# Supplementary material for: gtAI: an improved species-specific tRNA adaptation index using the genetic algorithm
Source: Front Mol Biosci. 2023 Jul 4;10:1218518. doi: 10.3389/fmolb.2023.1218518 (PMC10352787; doi:10.3389/fmolb.2023.1218518)
Supplement: Supplementary file 1 [file Table2.XLSX]

## Sheet: Ferroglobus placidus
gene id	gtAI	CAI	StAI
lcl|NC_013849.1_cds_10	0.367044	0.54625	0.400604
lcl|NC_013849.1_cds_1034	0.320643	0.592033	0.341527
lcl|NC_013849.1_cds_111	0.320662	0.619148	0.339836
lcl|NC_013849.1_cds_1142	0.33367	0.572332	0.354047
lcl|NC_013849.1_cds_1229	0.365354	0.7031	0.395341
lcl|NC_013849.1_cds_1283	0.345374	0.629797	0.365368
lcl|NC_013849.1_cds_1378	0.341738	0.713905	0.365396
lcl|NC_013849.1_cds_1399	0.38377	0.699583	0.422098
lcl|NC_013849.1_cds_1468	0.32052	0.548464	0.344667
lcl|NC_013849.1_cds_1509	0.334251	0.695375	0.359759
lcl|NC_013849.1_cds_1511	0.343234	0.577561	0.362491
lcl|NC_013849.1_cds_1598	0.337595	0.523312	0.361128
lcl|NC_013849.1_cds_1599	0.343719	0.605936	0.365243
lcl|NC_013849.1_cds_1644	0.289679	0.466012	0.303212
lcl|NC_013849.1_cds_1649	0.32052	0.548464	0.344667
lcl|NC_013849.1_cds_173	0.334378	0.729983	0.359638
lcl|NC_013849.1_cds_180	0.319336	0.54342	0.342113
lcl|NC_013849.1_cds_1812	0.362413	0.563209	0.390812
lcl|NC_013849.1_cds_1857	0.292477	0.512589	0.300527
lcl|NC_013849.1_cds_1858	0.353857	0.50098	0.378928
lcl|NC_013849.1_cds_1904	0.287639	0.503628	0.30137
lcl|NC_013849.1_cds_2003	0.357323	0.523425	0.370707
lcl|NC_013849.1_cds_2021	0.332702	0.601616	0.364434
lcl|NC_013849.1_cds_2048	0.308086	0.653471	0.325509
lcl|NC_013849.1_cds_2118	0.341945	0.505599	0.368707
lcl|NC_013849.1_cds_2142	0.336701	0.582207	0.361344
lcl|NC_013849.1_cds_2152	0.307849	0.541985	0.325601
lcl|NC_013849.1_cds_2174	0.32324	0.750203	0.34358
lcl|NC_013849.1_cds_22	0.352899	0.593852	0.390156
lcl|NC_013849.1_cds_221	0.32052	0.548464	0.344667
lcl|NC_013849.1_cds_2259	0.32445	0.53607	0.348454
lcl|NC_013849.1_cds_228	0.313799	0.569952	0.333584
lcl|NC_013849.1_cds_2282	0.361845	0.598272	0.384083
lcl|NC_013849.1_cds_229	0.333255	0.649857	0.359038
lcl|NC_013849.1_cds_230	0.302182	0.654639	0.319888
lcl|NC_013849.1_cds_231	0.317226	0.578599	0.343179
lcl|NC_013849.1_cds_2320	0.351293	0.656165	0.38174
lcl|NC_013849.1_cds_2321	0.32871	0.597724	0.361111
lcl|NC_013849.1_cds_233	0.325447	0.538061	0.349524
lcl|NC_013849.1_cds_2331	0.299978	0.580919	0.316448
lcl|NC_013849.1_cds_2334	0.348795	0.630205	0.373722
lcl|NC_013849.1_cds_2338	0.341158	0.578937	0.364981
lcl|NC_013849.1_cds_2342	0.32052	0.548464	0.344667
lcl|NC_013849.1_cds_2356	0.34097	0.599723	0.366778
lcl|NC_013849.1_cds_2428	0.360857	0.569489	0.396336
lcl|NC_013849.1_cds_2478	0.345668	0.564988	0.376766
lcl|NC_013849.1_cds_263	0.32023	0.513566	0.338203
lcl|NC_013849.1_cds_353	0.332922	0.59434	0.355933
lcl|NC_013849.1_cds_401	0.320014	0.604912	0.341485
lcl|NC_013849.1_cds_439	0.32052	0.548464	0.344667
lcl|NC_013849.1_cds_484	0.325828	0.550285	0.347574
lcl|NC_013849.1_cds_489	0.318072	0.512685	0.335548
lcl|NC_013849.1_cds_563	0.363528	0.607143	0.393836
lcl|NC_013849.1_cds_57	0.323606	0.53757	0.349037
lcl|NC_013849.1_cds_58	0.361964	0.654927	0.398055
lcl|NC_013849.1_cds_705	0.32052	0.548464	0.344667
lcl|NC_013849.1_cds_710	0.360186	0.651582	0.393545
lcl|NC_013849.1_cds_76	0.341469	0.627365	0.369783
lcl|NC_013849.1_cds_775	0.333406	0.667401	0.359291
lcl|NC_013849.1_cds_842	0.320041	0.597725	0.336077
lcl|NC_013849.1_cds_910	0.336606	0.57617	0.362315
lcl|NC_013849.1_cds_930	0.357235	0.52602	0.390476
lcl|NC_013849.1_cds_WP_012964544.1_3	0.339473	0.69026	0.362929
lcl|NC_013849.1_cds_WP_012964545.1_4	0.342424	0.678485	0.364391
lcl|NC_013849.1_cds_WP_012964546.1_5	0.329056	0.68197	0.348519
lcl|NC_013849.1_cds_WP_012964547.1_6	0.323971	0.662459	0.34282
lcl|NC_013849.1_cds_WP_012964548.1_7	0.341947	0.701004	0.369583
lcl|NC_013849.1_cds_WP_012964549.1_8	0.343269	0.709223	0.37044
lcl|NC_013849.1_cds_WP_012964550.1_9	0.345146	0.655101	0.369481
lcl|NC_013849.1_cds_WP_012964553.1_13	0.346336	0.695714	0.370635
lcl|NC_013849.1_cds_WP_012964554.1_14	0.31423	0.685912	0.336049
lcl|NC_013849.1_cds_WP_012964555.1_15	0.34106	0.719818	0.365344
lcl|NC_013849.1_cds_WP_012964556.1_16	0.355415	0.709266	0.383501
lcl|NC_013849.1_cds_WP_012964557.1_17	0.318991	0.645362	0.341352
lcl|NC_013849.1_cds_WP_012964558.1_18	0.3507	0.715054	0.380276
lcl|NC_013849.1_cds_WP_012964559.1_19	0.332921	0.660849	0.357415
lcl|NC_013849.1_cds_WP_012964560.1_20	0.352056	0.768486	0.38603
lcl|NC_013849.1_cds_WP_012964561.1_21	0.320828	0.663173	0.339799
lcl|NC_013849.1_cds_WP_012964563.1_23	0.338616	0.625755	0.358691
lcl|NC_013849.1_cds_WP_012964564.1_24	0.326559	0.614024	0.342454
lcl|NC_013849.1_cds_WP_012964565.1_25	0.3573	0.671703	0.386031
lcl|NC_013849.1_cds_WP_012964566.1_26	0.353767	0.730701	0.382723
lcl|NC_013849.1_cds_WP_012964567.1_27	0.336346	0.705636	0.36206
lcl|NC_013849.1_cds_WP_012964568.1_28	0.361172	0.74887	0.398515
lcl|NC_013849.1_cds_WP_012964569.1_29	0.350445	0.689846	0.380155
lcl|NC_013849.1_cds_WP_012964570.1_30	0.34443	0.660542	0.369161
lcl|NC_013849.1_cds_WP_012964571.1_31	0.375849	0.703634	0.413929
lcl|NC_013849.1_cds_WP_012964572.1_32	0.363127	0.722639	0.408198
lcl|NC_013849.1_cds_WP_012964573.1_33	0.384484	0.720592	0.422386
lcl|NC_013849.1_cds_WP_012964574.1_34	0.356693	0.731285	0.390341
lcl|NC_013849.1_cds_WP_012964575.1_35	0.318505	0.739485	0.344808
lcl|NC_013849.1_cds_WP_012964576.1_36	0.308947	0.628887	0.327474
lcl|NC_013849.1_cds_WP_012964579.1_39	0.324516	0.608955	0.3462
lcl|NC_013849.1_cds_WP_012964580.1_40	0.300441	0.575605	0.314558
lcl|NC_013849.1_cds_WP_012964581.1_41	0.322225	0.600456	0.340884
lcl|NC_013849.1_cds_WP_012964584.1_44	0.331061	0.610712	0.350369
lcl|NC_013849.1_cds_WP_012964585.1_45	0.299576	0.644822	0.320364
lcl|NC_013849.1_cds_WP_012964586.1_46	0.346868	0.735814	0.374986
lcl|NC_013849.1_cds_WP_012964588.1_48	0.345326	0.689226	0.37666
lcl|NC_013849.1_cds_WP_012964590.1_50	0.342465	0.686094	0.366302
lcl|NC_013849.1_cds_WP_012964592.1_52	0.326425	0.612737	0.343761
lcl|NC_013849.1_cds_WP_012964593.1_53	0.342618	0.685659	0.367584
lcl|NC_013849.1_cds_WP_012964594.1_54	0.341656	0.706762	0.367965
lcl|NC_013849.1_cds_WP_012964595.1_55	0.335383	0.650036	0.359409
lcl|NC_013849.1_cds_WP_012964596.1_56	0.34641	0.716629	0.377404
lcl|NC_013849.1_cds_WP_012964597.1_59	0.348568	0.714291	0.37375
lcl|NC_013849.1_cds_WP_012964598.1_60	0.369942	0.783774	0.405944
lcl|NC_013849.1_cds_WP_012964599.1_61	0.329147	0.689118	0.349885
lcl|NC_013849.1_cds_WP_012964600.1_62	0.334385	0.642793	0.352794
lcl|NC_013849.1_cds_WP_012964601.1_63	0.33212	0.653781	0.355652
lcl|NC_013849.1_cds_WP_012964602.1_64	0.358929	0.742947	0.390497
lcl|NC_013849.1_cds_WP_012964603.1_65	0.348563	0.728903	0.380232
lcl|NC_013849.1_cds_WP_012964604.1_66	0.372682	0.65738	0.410417
lcl|NC_013849.1_cds_WP_012964606.1_68	0.347092	0.675821	0.375915
lcl|NC_013849.1_cds_WP_012964607.1_69	0.322514	0.601305	0.339759
lcl|NC_013849.1_cds_WP_012964608.1_70	0.364607	0.683661	0.396234
lcl|NC_013849.1_cds_WP_012964609.1_71	0.335676	0.6563	0.364948
lcl|NC_013849.1_cds_WP_012964610.1_72	0.341376	0.651341	0.370609
lcl|NC_013849.1_cds_WP_012964611.1_73	0.35365	0.69411	0.382638
lcl|NC_013849.1_cds_WP_012964612.1_101	0.320663	0.659017	0.357863
lcl|NC_013849.1_cds_WP_012964612.1_1446	0.320663	0.659017	0.357863
lcl|NC_013849.1_cds_WP_012964612.1_2333	0.320663	0.659017	0.357863
lcl|NC_013849.1_cds_WP_012964612.1_646	0.320663	0.659017	0.357863
lcl|NC_013849.1_cds_WP_012964612.1_74	0.320663	0.659017	0.357863
lcl|NC_013849.1_cds_WP_012964613.1_102	0.342542	0.682405	0.373632
lcl|NC_013849.1_cds_WP_012964613.1_1447	0.342542	0.682405	0.373632
lcl|NC_013849.1_cds_WP_012964613.1_645	0.342542	0.682405	0.373632
lcl|NC_013849.1_cds_WP_012964613.1_75	0.342542	0.682405	0.373632
lcl|NC_013849.1_cds_WP_012964615.1_77	0.331868	0.641031	0.358138
lcl|NC_013849.1_cds_WP_012964616.1_79	0.349905	0.724488	0.378174
lcl|NC_013849.1_cds_WP_012964617.1_80	0.335285	0.639496	0.356234
lcl|NC_013849.1_cds_WP_012964618.1_81	0.348321	0.635894	0.368417
lcl|NC_013849.1_cds_WP_012964620.1_83	0.361202	0.69175	0.394262
lcl|NC_013849.1_cds_WP_012964622.1_85	0.343766	0.66118	0.368697
lcl|NC_013849.1_cds_WP_012964623.1_86	0.334384	0.654561	0.361928
lcl|NC_013849.1_cds_WP_012964625.1_88	0.347473	0.633581	0.38128
lcl|NC_013849.1_cds_WP_012964626.1_89	0.361824	0.650184	0.396637
lcl|NC_013849.1_cds_WP_012964627.1_90	0.361944	0.720171	0.393398
lcl|NC_013849.1_cds_WP_012964628.1_91	0.358827	0.723806	0.389255
lcl|NC_013849.1_cds_WP_012964629.1_92	0.337308	0.705227	0.36167
lcl|NC_013849.1_cds_WP_012964630.1_93	0.365189	0.692902	0.395404
lcl|NC_013849.1_cds_WP_012964632.1_95	0.352797	0.691258	0.379108
lcl|NC_013849.1_cds_WP_012964633.1_96	0.338328	0.678289	0.364217
lcl|NC_013849.1_cds_WP_012964634.1_97	0.347247	0.653202	0.371813
lcl|NC_013849.1_cds_WP_012964635.1_98	0.345685	0.712049	0.369242
lcl|NC_013849.1_cds_WP_012964636.1_99	0.341485	0.681234	0.368185
lcl|NC_013849.1_cds_WP_012964637.1_100	0.35993	0.702815	0.387387
lcl|NC_013849.1_cds_WP_012964638.1_103	0.315692	0.576348	0.335842
lcl|NC_013849.1_cds_WP_012964640.1_105	0.330216	0.702741	0.357923
lcl|NC_013849.1_cds_WP_012964641.1_106	0.331413	0.7296	0.356159
lcl|NC_013849.1_cds_WP_012964642.1_107	0.336992	0.621572	0.358116
lcl|NC_013849.1_cds_WP_012964643.1_108	0.317447	0.646888	0.338742
lcl|NC_013849.1_cds_WP_012964644.1_109	0.338438	0.69407	0.363797
lcl|NC_013849.1_cds_WP_012964645.1_110	0.323774	0.637103	0.343994
lcl|NC_013849.1_cds_WP_012964647.1_113	0.351602	0.677284	0.383208
lcl|NC_013849.1_cds_WP_012964648.1_114	0.338697	0.623052	0.360367
lcl|NC_013849.1_cds_WP_012964649.1_115	0.344146	0.658406	0.374305
lcl|NC_013849.1_cds_WP_012964650.1_116	0.33401	0.733072	0.359412
lcl|NC_013849.1_cds_WP_012964651.1_117	0.339303	0.665522	0.365535
lcl|NC_013849.1_cds_WP_012964652.1_118	0.326641	0.706515	0.347069
lcl|NC_013849.1_cds_WP_012964653.1_119	0.316806	0.640398	0.334946
lcl|NC_013849.1_cds_WP_012964654.1_120	0.326744	0.672486	0.350708
lcl|NC_013849.1_cds_WP_012964655.1_121	0.336767	0.666722	0.359523
lcl|NC_013849.1_cds_WP_012964656.1_122	0.341118	0.68641	0.359319
lcl|NC_013849.1_cds_WP_012964658.1_124	0.342941	0.686428	0.368541
lcl|NC_013849.1_cds_WP_012964659.1_125	0.360148	0.725574	0.386218
lcl|NC_013849.1_cds_WP_012964661.1_127	0.362251	0.661127	0.385933
lcl|NC_013849.1_cds_WP_012964662.1_128	0.339958	0.619746	0.367607
lcl|NC_013849.1_cds_WP_012964663.1_129	0.334495	0.696668	0.356761
lcl|NC_013849.1_cds_WP_012964664.1_130	0.360465	0.640192	0.38397
lcl|NC_013849.1_cds_WP_012964665.1_131	0.351003	0.671184	0.376754
lcl|NC_013849.1_cds_WP_012964666.1_132	0.324745	0.609848	0.342163
lcl|NC_013849.1_cds_WP_012964669.1_135	0.350225	0.678113	0.379673
lcl|NC_013849.1_cds_WP_012964670.1_136	0.325151	0.736049	0.342969
lcl|NC_013849.1_cds_WP_012964672.1_138	0.355259	0.679005	0.377844
lcl|NC_013849.1_cds_WP_012964673.1_139	0.311792	0.725323	0.329105
lcl|NC_013849.1_cds_WP_012964674.1_140	0.330496	0.672004	0.354435
lcl|NC_013849.1_cds_WP_012964675.1_141	0.338815	0.732983	0.36585
lcl|NC_013849.1_cds_WP_012964676.1_142	0.339145	0.696575	0.365061
lcl|NC_013849.1_cds_WP_012964677.1_143	0.309658	0.658969	0.328867
lcl|NC_013849.1_cds_WP_012964678.1_144	0.342017	0.712251	0.366757
lcl|NC_013849.1_cds_WP_012964679.1_145	0.336375	0.665208	0.363089
lcl|NC_013849.1_cds_WP_012964680.1_147	0.358315	0.7204	0.391303
lcl|NC_013849.1_cds_WP_012964681.1_148	0.337397	0.713507	0.36269
lcl|NC_013849.1_cds_WP_012964682.1_149	0.33786	0.676882	0.359824
lcl|NC_013849.1_cds_WP_012964684.1_151	0.317772	0.657528	0.33905
lcl|NC_013849.1_cds_WP_012964685.1_152	0.342208	0.700421	0.369482
lcl|NC_013849.1_cds_WP_012964687.1_154	0.321355	0.683425	0.343403
lcl|NC_013849.1_cds_WP_012964688.1_155	0.362065	0.7011	0.391357
lcl|NC_013849.1_cds_WP_012964689.1_156	0.342224	0.675836	0.364246
lcl|NC_013849.1_cds_WP_012964690.1_157	0.387234	0.766276	0.426531
lcl|NC_013849.1_cds_WP_012964692.1_159	0.355947	0.695568	0.398107
lcl|NC_013849.1_cds_WP_012964693.1_160	0.341223	0.650465	0.363384
lcl|NC_013849.1_cds_WP_012964694.1_161	0.343553	0.668638	0.367423
lcl|NC_013849.1_cds_WP_012964695.1_162	0.34863	0.701739	0.372576
lcl|NC_013849.1_cds_WP_012964696.1_163	0.36311	0.644523	0.399645
lcl|NC_013849.1_cds_WP_012964697.1_164	0.364474	0.737174	0.396518
lcl|NC_013849.1_cds_WP_012964698.1_165	0.328497	0.655919	0.350251
lcl|NC_013849.1_cds_WP_012964699.1_166	0.33384	0.617522	0.350441
lcl|NC_013849.1_cds_WP_012964700.1_167	0.362162	0.743909	0.399536
lcl|NC_013849.1_cds_WP_012964701.1_168	0.341006	0.6693	0.364877
lcl|NC_013849.1_cds_WP_012964702.1_169	0.320301	0.689808	0.341706
lcl|NC_013849.1_cds_WP_012964703.1_170	0.32142	0.648192	0.344551
lcl|NC_013849.1_cds_WP_012964704.1_171	0.311123	0.654947	0.334165
lcl|NC_013849.1_cds_WP_012964707.1_174	0.367705	0.698176	0.407043
lcl|NC_013849.1_cds_WP_012964708.1_175	0.342739	0.707921	0.368342
lcl|NC_013849.1_cds_WP_012964709.1_176	0.351952	0.738693	0.386178
lcl|NC_013849.1_cds_WP_012964710.1_177	0.334128	0.662698	0.356297
lcl|NC_013849.1_cds_WP_012964711.1_178	0.360865	0.692127	0.391435
lcl|NC_013849.1_cds_WP_012964712.1_179	0.304352	0.601014	0.316863
lcl|NC_013849.1_cds_WP_012964714.1_181	0.337898	0.662207	0.360404
lcl|NC_013849.1_cds_WP_012964715.1_182	0.350363	0.656351	0.375054
lcl|NC_013849.1_cds_WP_012964716.1_183	0.345876	0.68297	0.369821
lcl|NC_013849.1_cds_WP_012964717.1_184	0.317077	0.62561	0.334992
lcl|NC_013849.1_cds_WP_012964718.1_186	0.354004	0.70268	0.381701
lcl|NC_013849.1_cds_WP_012964719.1_187	0.341937	0.672393	0.363511
lcl|NC_013849.1_cds_WP_012964720.1_188	0.336812	0.667393	0.362793
lcl|NC_013849.1_cds_WP_012964721.1_189	0.344417	0.67888	0.373771
lcl|NC_013849.1_cds_WP_012964722.1_190	0.325893	0.700071	0.347986
lcl|NC_013849.1_cds_WP_012964724.1_192	0.331253	0.652589	0.358363
lcl|NC_013849.1_cds_WP_012964725.1_193	0.3495	0.701902	0.370057
lcl|NC_013849.1_cds_WP_012964727.1_195	0.343399	0.720335	0.372809
lcl|NC_013849.1_cds_WP_012964728.1_196	0.320422	0.709374	0.348917
lcl|NC_013849.1_cds_WP_012964729.1_197	0.316498	0.638397	0.337925
lcl|NC_013849.1_cds_WP_012964730.1_198	0.33551	0.59897	0.360016
lcl|NC_013849.1_cds_WP_012964731.1_199	0.318691	0.605091	0.333933
lcl|NC_013849.1_cds_WP_012964732.1_200	0.324457	0.690175	0.34738
lcl|NC_013849.1_cds_WP_012964733.1_201	0.367914	0.697675	0.405796
lcl|NC_013849.1_cds_WP_012964735.1_203	0.317866	0.636958	0.336788
lcl|NC_013849.1_cds_WP_012964736.1_204	0.299408	0.640012	0.322655
lcl|NC_013849.1_cds_WP_012964737.1_205	0.335837	0.693579	0.356047
lcl|NC_013849.1_cds_WP_012964738.1_206	0.320186	0.652622	0.336536
lcl|NC_013849.1_cds_WP_012964739.1_207	0.327436	0.631912	0.348192
lcl|NC_013849.1_cds_WP_012964742.1_210	0.334385	0.660793	0.353871
lcl|NC_013849.1_cds_WP_012964743.1_211	0.340878	0.653928	0.36706
lcl|NC_013849.1_cds_WP_012964744.1_212	0.331829	0.70241	0.354739
lcl|NC_013849.1_cds_WP_012964745.1_213	0.333045	0.627428	0.350456
lcl|NC_013849.1_cds_WP_012964746.1_214	0.314041	0.643666	0.333939
lcl|NC_013849.1_cds_WP_012964747.1_215	0.358472	0.775045	0.394643
lcl|NC_013849.1_cds_WP_012964749.1_217	0.345164	0.684196	0.376113
lcl|NC_013849.1_cds_WP_012964750.1_218	0.323459	0.648046	0.348774
lcl|NC_013849.1_cds_WP_012964751.1_219	0.341069	0.598917	0.373824
lcl|NC_013849.1_cds_WP_012964754.1_222	0.328133	0.66229	0.347968
lcl|NC_013849.1_cds_WP_012964755.1_223	0.345237	0.676944	0.371771
lcl|NC_013849.1_cds_WP_012964756.1_224	0.333845	0.618307	0.358239
lcl|NC_013849.1_cds_WP_012964757.1_225	0.322747	0.600523	0.344727
lcl|NC_013849.1_cds_WP_012964759.1_227	0.302019	0.628041	0.322611
lcl|NC_013849.1_cds_WP_012964763.1_234	0.314566	0.566147	0.331533
lcl|NC_013849.1_cds_WP_012964765.1_236	0.320581	0.583512	0.335975
lcl|NC_013849.1_cds_WP_012964767.1_238	0.365002	0.709081	0.393819
lcl|NC_013849.1_cds_WP_012964768.1_239	0.36287	0.733088	0.393677
lcl|NC_013849.1_cds_WP_012964769.1_240	0.331781	0.654669	0.360693
lcl|NC_013849.1_cds_WP_012964770.1_241	0.382426	0.737195	0.415915
lcl|NC_013849.1_cds_WP_012964771.1_242	0.329103	0.670025	0.351357
lcl|NC_013849.1_cds_WP_012964772.1_243	0.326704	0.657706	0.3462
lcl|NC_013849.1_cds_WP_012964773.1_244	0.372998	0.751373	0.406455
lcl|NC_013849.1_cds_WP_012964774.1_245	0.35584	0.745372	0.389784
lcl|NC_013849.1_cds_WP_012964775.1_246	0.321921	0.713029	0.345036
lcl|NC_013849.1_cds_WP_012964776.1_247	0.355234	0.740818	0.381993
lcl|NC_013849.1_cds_WP_012964777.1_248	0.343483	0.783181	0.38341
lcl|NC_013849.1_cds_WP_012964778.1_249	0.328369	0.65474	0.346746
lcl|NC_013849.1_cds_WP_012964779.1_250	0.35228	0.72567	0.377394
lcl|NC_013849.1_cds_WP_012964780.1_251	0.347829	0.678314	0.375039
lcl|NC_013849.1_cds_WP_012964781.1_252	0.351609	0.702948	0.374261
lcl|NC_013849.1_cds_WP_012964782.1_253	0.362869	0.69674	0.388195
lcl|NC_013849.1_cds_WP_012964784.1_255	0.344907	0.701783	0.381909
lcl|NC_013849.1_cds_WP_012964785.1_256	0.316076	0.601107	0.334661
lcl|NC_013849.1_cds_WP_012964787.1_259	0.347812	0.583328	0.374511
lcl|NC_013849.1_cds_WP_012964788.1_260	0.32834	0.606969	0.351432
lcl|NC_013849.1_cds_WP_012964789.1_261	0.338114	0.607324	0.365071
lcl|NC_013849.1_cds_WP_012964790.1_262	0.348305	0.590602	0.381985
lcl|NC_013849.1_cds_WP_012964791.1_264	0.324382	0.683364	0.346476
lcl|NC_013849.1_cds_WP_012964793.1_266	0.349041	0.678088	0.37335
lcl|NC_013849.1_cds_WP_012964794.1_267	0.336532	0.718641	0.365098
lcl|NC_013849.1_cds_WP_012964795.1_268	0.338104	0.705781	0.363148
lcl|NC_013849.1_cds_WP_012964797.1_270	0.322857	0.675284	0.341761
lcl|NC_013849.1_cds_WP_012964798.1_271	0.326625	0.673745	0.348306
lcl|NC_013849.1_cds_WP_012964799.1_272	0.353729	0.713429	0.382804
lcl|NC_013849.1_cds_WP_012964800.1_273	0.344156	0.647565	0.373568
lcl|NC_013849.1_cds_WP_012964801.1_274	0.33489	0.71333	0.365472
lcl|NC_013849.1_cds_WP_012964802.1_275	0.342238	0.701573	0.375645
lcl|NC_013849.1_cds_WP_012964803.1_276	0.359251	0.694937	0.396796
lcl|NC_013849.1_cds_WP_012964804.1_277	0.319423	0.65274	0.341027
lcl|NC_013849.1_cds_WP_012964806.1_279	0.340518	0.701796	0.367174
lcl|NC_013849.1_cds_WP_012964807.1_280	0.299603	0.606818	0.311703
lcl|NC_013849.1_cds_WP_012964808.1_281	0.314452	0.639956	0.333674
lcl|NC_013849.1_cds_WP_012964809.1_282	0.341589	0.683772	0.366976
lcl|NC_013849.1_cds_WP_012964810.1_283	0.320978	0.608695	0.340057
lcl|NC_013849.1_cds_WP_012964811.1_284	0.347675	0.734359	0.379526
lcl|NC_013849.1_cds_WP_012964812.1_285	0.324846	0.647689	0.346695
lcl|NC_013849.1_cds_WP_012964813.1_286	0.323107	0.70329	0.34295
lcl|NC_013849.1_cds_WP_012964814.1_287	0.339185	0.725677	0.361182
lcl|NC_013849.1_cds_WP_012964816.1_289	0.343858	0.683131	0.371135
lcl|NC_013849.1_cds_WP_012964817.1_290	0.324648	0.606884	0.341151
lcl|NC_013849.1_cds_WP_012964818.1_291	0.294694	0.574945	0.312879
lcl|NC_013849.1_cds_WP_012964819.1_292	0.301687	0.569517	0.315694
lcl|NC_013849.1_cds_WP_012964821.1_294	0.341148	0.618602	0.371435
lcl|NC_013849.1_cds_WP_012964822.1_295	0.376591	0.719875	0.412246
lcl|NC_013849.1_cds_WP_012964823.1_296	0.333689	0.624674	0.362928
lcl|NC_013849.1_cds_WP_012964824.1_297	0.35963	0.727072	0.389788
lcl|NC_013849.1_cds_WP_012964825.1_298	0.325309	0.677668	0.349686
lcl|NC_013849.1_cds_WP_012964826.1_299	0.366502	0.726309	0.39798
lcl|NC_013849.1_cds_WP_012964827.1_300	0.36085	0.710993	0.396168
lcl|NC_013849.1_cds_WP_012964828.1_301	0.355564	0.696666	0.390071
lcl|NC_013849.1_cds_WP_012964829.1_302	0.355665	0.742678	0.382621
lcl|NC_013849.1_cds_WP_012964830.1_303	0.322865	0.693728	0.349003
lcl|NC_013849.1_cds_WP_012964831.1_304	0.368382	0.74605	0.408345
lcl|NC_013849.1_cds_WP_012964833.1_306	0.331596	0.722139	0.349834
lcl|NC_013849.1_cds_WP_012964834.1_307	0.375224	0.713219	0.404967
lcl|NC_013849.1_cds_WP_012964835.1_308	0.322668	0.704518	0.342841
lcl|NC_013849.1_cds_WP_012964837.1_310	0.316058	0.612743	0.335808
lcl|NC_013849.1_cds_WP_012964838.1_311	0.347349	0.69201	0.369306
lcl|NC_013849.1_cds_WP_012964839.1_312	0.341744	0.701156	0.360672
lcl|NC_013849.1_cds_WP_012964840.1_313	0.319812	0.672942	0.33772
lcl|NC_013849.1_cds_WP_012964841.1_314	0.34192	0.646169	0.36118
lcl|NC_013849.1_cds_WP_012964842.1_315	0.335415	0.632524	0.35445
lcl|NC_013849.1_cds_WP_012964843.1_317	0.329268	0.631255	0.354289
lcl|NC_013849.1_cds_WP_012964844.1_318	0.352294	0.714105	0.379142
lcl|NC_013849.1_cds_WP_012964845.1_319	0.351966	0.738202	0.378323
lcl|NC_013849.1_cds_WP_012964846.1_320	0.364291	0.695882	0.393493
lcl|NC_013849.1_cds_WP_012964847.1_321	0.328972	0.646991	0.353563
lcl|NC_013849.1_cds_WP_012964848.1_322	0.387091	0.728589	0.421224
lcl|NC_013849.1_cds_WP_012964849.1_323	0.339824	0.705026	0.363918
lcl|NC_013849.1_cds_WP_012964850.1_324	0.350504	0.719799	0.379558
lcl|NC_013849.1_cds_WP_012964851.1_325	0.338162	0.682562	0.360331
lcl|NC_013849.1_cds_WP_012964853.1_327	0.366394	0.660845	0.394676
lcl|NC_013849.1_cds_WP_012964854.1_329	0.348057	0.711208	0.370633
lcl|NC_013849.1_cds_WP_012964856.1_330	0.32893	0.627746	0.345746
lcl|NC_013849.1_cds_WP_012964857.1_331	0.380124	0.71996	0.410921
lcl|NC_013849.1_cds_WP_012964858.1_332	0.328717	0.714891	0.347294
lcl|NC_013849.1_cds_WP_012964861.1_334	0.31588	0.652177	0.342143
lcl|NC_013849.1_cds_WP_012964862.1_335	0.327368	0.566563	0.353
lcl|NC_013849.1_cds_WP_012964863.1_336	0.333231	0.625243	0.358163
lcl|NC_013849.1_cds_WP_012964865.1_337	0.359888	0.642467	0.385946
lcl|NC_013849.1_cds_WP_012964866.1_338	0.333835	0.668918	0.356864
lcl|NC_013849.1_cds_WP_012964867.1_339	0.370912	0.679335	0.410019
lcl|NC_013849.1_cds_WP_012964869.1_340	0.321235	0.710119	0.341966
lcl|NC_013849.1_cds_WP_012964870.1_341	0.335815	0.62762	0.364774
lcl|NC_013849.1_cds_WP_012964871.1_342	0.340693	0.708486	0.364663
lcl|NC_013849.1_cds_WP_012964872.1_343	0.345413	0.77037	0.380028
lcl|NC_013849.1_cds_WP_012964873.1_344	0.348023	0.699679	0.380108
lcl|NC_013849.1_cds_WP_012964874.1_345	0.344339	0.695232	0.37561
lcl|NC_013849.1_cds_WP_012964875.1_346	0.339612	0.623713	0.365651
lcl|NC_013849.1_cds_WP_012964876.1_347	0.342951	0.656627	0.371328
lcl|NC_013849.1_cds_WP_012964877.1_348	0.3366	0.699966	0.362444
lcl|NC_013849.1_cds_WP_012964878.1_349	0.330636	0.629658	0.348147
lcl|NC_013849.1_cds_WP_012964879.1_350	0.339881	0.694285	0.36035
lcl|NC_013849.1_cds_WP_012964880.1_351	0.392199	0.703131	0.428939
lcl|NC_013849.1_cds_WP_012964882.1_354	0.29629	0.509862	0.306134
lcl|NC_013849.1_cds_WP_012964883.1_355	0.318411	0.678739	0.340277
lcl|NC_013849.1_cds_WP_012964884.1_356	0.33399	0.68729	0.363218
lcl|NC_013849.1_cds_WP_012964885.1_357	0.325971	0.689506	0.343801
lcl|NC_013849.1_cds_WP_012964886.1_358	0.350455	0.716088	0.386293
lcl|NC_013849.1_cds_WP_012964887.1_359	0.337624	0.683047	0.355885
lcl|NC_013849.1_cds_WP_012964888.1_360	0.374117	0.7649	0.411791
lcl|NC_013849.1_cds_WP_012964889.1_361	0.329529	0.622351	0.353353
lcl|NC_013849.1_cds_WP_012964890.1_362	0.328168	0.667233	0.346797
lcl|NC_013849.1_cds_WP_012964891.1_363	0.343903	0.698918	0.372023
lcl|NC_013849.1_cds_WP_012964892.1_364	0.347761	0.660702	0.371256
lcl|NC_013849.1_cds_WP_012964893.1_365	0.327464	0.635809	0.349693
lcl|NC_013849.1_cds_WP_012964894.1_366	0.325553	0.628096	0.349255
lcl|NC_013849.1_cds_WP_012964895.1_367	0.326003	0.702235	0.350849
lcl|NC_013849.1_cds_WP_012964896.1_368	0.341957	0.680963	0.367683
lcl|NC_013849.1_cds_WP_012964897.1_369	0.34634	0.685248	0.372975
lcl|NC_013849.1_cds_WP_012964898.1_372	0.318658	0.69482	0.338587
lcl|NC_013849.1_cds_WP_012964899.1_373	0.33303	0.684937	0.356318
lcl|NC_013849.1_cds_WP_012964900.1_374	0.35466	0.666508	0.379982
lcl|NC_013849.1_cds_WP_012964901.1_375	0.337736	0.663993	0.36157
lcl|NC_013849.1_cds_WP_012964902.1_376	0.328881	0.678385	0.354103
lcl|NC_013849.1_cds_WP_012964903.1_377	0.336994	0.655152	0.365311
lcl|NC_013849.1_cds_WP_012964904.1_378	0.3487	0.671973	0.372062
lcl|NC_013849.1_cds_WP_012964905.1_379	0.344934	0.710612	0.372339
lcl|NC_013849.1_cds_WP_012964906.1_380	0.3433	0.720313	0.372896
lcl|NC_013849.1_cds_WP_012964907.1_381	0.351605	0.728603	0.380081
lcl|NC_013849.1_cds_WP_012964908.1_382	0.340736	0.706076	0.377903
lcl|NC_013849.1_cds_WP_012964909.1_383	0.336269	0.654391	0.357742
lcl|NC_013849.1_cds_WP_012964910.1_384	0.360453	0.672116	0.38913
lcl|NC_013849.1_cds_WP_012964911.1_385	0.334117	0.708128	0.360832
lcl|NC_013849.1_cds_WP_012964912.1_386	0.358582	0.75349	0.386539
lcl|NC_013849.1_cds_WP_012964913.1_387	0.367375	0.733503	0.404477
lcl|NC_013849.1_cds_WP_012964914.1_388	0.34171	0.684633	0.368575
lcl|NC_013849.1_cds_WP_012964917.1_391	0.345314	0.688714	0.370084
lcl|NC_013849.1_cds_WP_012964919.1_393	0.319922	0.588563	0.333184
lcl|NC_013849.1_cds_WP_012964921.1_394	0.318613	0.622259	0.334992
lcl|NC_013849.1_cds_WP_012964922.1_395	0.314568	0.582837	0.32805
lcl|NC_013849.1_cds_WP_012964923.1_396	0.293573	0.543753	0.303819
lcl|NC_013849.1_cds_WP_012964924.1_397	0.307916	0.612943	0.321648
lcl|NC_013849.1_cds_WP_012964925.1_398	0.293657	0.566505	0.307764
lcl|NC_013849.1_cds_WP_012964926.1_399	0.309114	0.690748	0.323781
lcl|NC_013849.1_cds_WP_012964927.1_400	0.30748	0.608521	0.322017
lcl|NC_013849.1_cds_WP_012964930.1_402	0.295434	0.561597	0.306908
lcl|NC_013849.1_cds_WP_012964931.1_403	0.299813	0.57424	0.314487
lcl|NC_013849.1_cds_WP_012964932.1_404	0.327978	0.637699	0.345607
lcl|NC_013849.1_cds_WP_012964933.1_405	0.313717	0.579838	0.327805
lcl|NC_013849.1_cds_WP_012964934.1_406	0.341084	0.611004	0.361076
lcl|NC_013849.1_cds_WP_012964936.1_407	0.351189	0.557555	0.378871
lcl|NC_013849.1_cds_WP_012964938.1_409	0.35543	0.645303	0.38498
lcl|NC_013849.1_cds_WP_012964939.1_410	0.347082	0.588299	0.372796
lcl|NC_013849.1_cds_WP_012964941.1_412	0.312698	0.526923	0.328969
lcl|NC_013849.1_cds_WP_012964944.1_417	0.354656	0.636949	0.388126
lcl|NC_013849.1_cds_WP_012964945.1_418	0.310006	0.567054	0.323208
lcl|NC_013849.1_cds_WP_012964946.1_419	0.306915	0.601533	0.322933
lcl|NC_013849.1_cds_WP_012964947.1_420	0.359169	0.637105	0.388196
lcl|NC_013849.1_cds_WP_012964948.1_421	0.33989	0.634824	0.366918
lcl|NC_013849.1_cds_WP_012964949.1_422	0.339572	0.652318	0.362034
lcl|NC_013849.1_cds_WP_012964950.1_423	0.3214	0.800437	0.340782
lcl|NC_013849.1_cds_WP_012964951.1_424	0.316441	0.564608	0.330446
lcl|NC_013849.1_cds_WP_012964954.1_428	0.351205	0.650593	0.37566
lcl|NC_013849.1_cds_WP_012964955.1_429	0.353855	0.658425	0.37521
lcl|NC_013849.1_cds_WP_012964956.1_430	0.352433	0.602366	0.377342
lcl|NC_013849.1_cds_WP_012964957.1_431	0.324593	0.562222	0.347352
lcl|NC_013849.1_cds_WP_012964959.1_433	0.332291	0.645793	0.359213
lcl|NC_013849.1_cds_WP_012964960.1_434	0.313023	0.678152	0.33701
lcl|NC_013849.1_cds_WP_012964963.1_437	0.297235	0.571827	0.308776
lcl|NC_013849.1_cds_WP_012964964.1_438	0.299749	0.55712	0.313768
lcl|NC_013849.1_cds_WP_012964965.1_440	0.338569	0.611243	0.368578
lcl|NC_013849.1_cds_WP_012964966.1_441	0.371787	0.647149	0.417377
lcl|NC_013849.1_cds_WP_012964967.1_442	0.339328	0.621247	0.362833
lcl|NC_013849.1_cds_WP_012964968.1_443	0.340866	0.534396	0.360807
lcl|NC_013849.1_cds_WP_012964969.1_444	0.365193	0.62621	0.404921
lcl|NC_013849.1_cds_WP_012964970.1_445	0.362422	0.552016	0.398693
lcl|NC_013849.1_cds_WP_012964971.1_446	0.36569	0.630556	0.402892
lcl|NC_013849.1_cds_WP_012964972.1_447	0.357047	0.645423	0.398485
lcl|NC_013849.1_cds_WP_012964974.1_449	0.354175	0.594967	0.383402
lcl|NC_013849.1_cds_WP_012964975.1_450	0.358789	0.569672	0.396447
lcl|NC_013849.1_cds_WP_012964976.1_451	0.333729	0.60802	0.358979
lcl|NC_013849.1_cds_WP_012964979.1_455	0.377908	0.55473	0.409904
lcl|NC_013849.1_cds_WP_012964981.1_456	0.365964	0.613278	0.404178
lcl|NC_013849.1_cds_WP_012964983.1_457	0.346333	0.598214	0.377219
lcl|NC_013849.1_cds_WP_012964984.1_458	0.343347	0.599196	0.374188
lcl|NC_013849.1_cds_WP_012964985.1_459	0.339236	0.659035	0.371228
lcl|NC_013849.1_cds_WP_012964986.1_460	0.328408	0.552367	0.354071
lcl|NC_013849.1_cds_WP_012964987.1_461	0.364228	0.607556	0.39764
lcl|NC_013849.1_cds_WP_012964988.1_462	0.360629	0.641298	0.397251
lcl|NC_013849.1_cds_WP_012964989.1_463	0.35708	0.624029	0.397472
lcl|NC_013849.1_cds_WP_012964990.1_464	0.346223	0.627172	0.380302
lcl|NC_013849.1_cds_WP_012964991.1_465	0.345708	0.545422	0.370531
lcl|NC_013849.1_cds_WP_012964992.1_466	0.356343	0.634192	0.381716
lcl|NC_013849.1_cds_WP_012964993.1_467	0.349962	0.6285	0.380116
lcl|NC_013849.1_cds_WP_012964995.1_469	0.338185	0.601318	0.369168
lcl|NC_013849.1_cds_WP_012964996.1_470	0.352873	0.660559	0.378399
lcl|NC_013849.1_cds_WP_012964997.1_471	0.359412	0.635863	0.388391
lcl|NC_013849.1_cds_WP_012964999.1_473	0.336487	0.628463	0.369227
lcl|NC_013849.1_cds_WP_012965001.1_475	0.3683	0.579431	0.407477
lcl|NC_013849.1_cds_WP_012965002.1_476	0.368901	0.653115	0.411308
lcl|NC_013849.1_cds_WP_012965004.1_477	0.353727	0.553099	0.388439
lcl|NC_013849.1_cds_WP_012965005.1_478	0.340348	0.607667	0.365317
lcl|NC_013849.1_cds_WP_012965006.1_479	0.342407	0.614369	0.367114
lcl|NC_013849.1_cds_WP_012965007.1_480	0.352161	0.586904	0.380788
lcl|NC_013849.1_cds_WP_012965009.1_482	0.368321	0.573052	0.398832
lcl|NC_013849.1_cds_WP_012965010.1_483	0.378043	0.626977	0.423962
lcl|NC_013849.1_cds_WP_012965013.1_485	0.339603	0.614054	0.367018
lcl|NC_013849.1_cds_WP_012965014.1_486	0.346244	0.582913	0.372831
lcl|NC_013849.1_cds_WP_012965015.1_487	0.350284	0.548242	0.374223
lcl|NC_013849.1_cds_WP_012965017.1_490	0.340392	0.580744	0.373989
lcl|NC_013849.1_cds_WP_012965019.1_492	0.335865	0.597309	0.36572
lcl|NC_013849.1_cds_WP_012965021.1_493	0.368291	0.54922	0.402961
lcl|NC_013849.1_cds_WP_012965022.1_494	0.364725	0.621143	0.392368
lcl|NC_013849.1_cds_WP_012965023.1_495	0.364045	0.527389	0.393759
lcl|NC_013849.1_cds_WP_012965024.1_496	0.371618	0.619421	0.406141
lcl|NC_013849.1_cds_WP_012965025.1_497	0.323405	0.624646	0.34315
lcl|NC_013849.1_cds_WP_012965026.1_498	0.361123	0.580617	0.400497
lcl|NC_013849.1_cds_WP_012965028.1_500	0.364362	0.592228	0.406347
lcl|NC_013849.1_cds_WP_012965029.1_501	0.339512	0.605823	0.366441
lcl|NC_013849.1_cds_WP_012965030.1_502	0.382489	0.670913	0.429808
lcl|NC_013849.1_cds_WP_012965031.1_503	0.351896	0.600995	0.377244
lcl|NC_013849.1_cds_WP_012965032.1_504	0.406911	0.664816	0.433102
lcl|NC_013849.1_cds_WP_012965033.1_505	0.375562	0.646136	0.413617
lcl|NC_013849.1_cds_WP_012965034.1_506	0.370764	0.633927	0.411187
lcl|NC_013849.1_cds_WP_012965036.1_508	0.400771	0.650897	0.453734
lcl|NC_013849.1_cds_WP_012965037.1_509	0.351744	0.631607	0.384929
lcl|NC_013849.1_cds_WP_012965038.1_510	0.377785	0.654141	0.415404
lcl|NC_013849.1_cds_WP_012965039.1_511	0.350385	0.629157	0.382174
lcl|NC_013849.1_cds_WP_012965040.1_512	0.352928	0.60929	0.387988
lcl|NC_013849.1_cds_WP_012965041.1_513	0.354103	0.646468	0.385775
lcl|NC_013849.1_cds_WP_012965044.1_516	0.336473	0.644715	0.354996
lcl|NC_013849.1_cds_WP_012965046.1_517	0.35592	0.536493	0.383445
lcl|NC_013849.1_cds_WP_012965047.1_518	0.370437	0.608725	0.409937
lcl|NC_013849.1_cds_WP_012965048.1_519	0.354657	0.639893	0.393323
lcl|NC_013849.1_cds_WP_012965049.1_520	0.358903	0.698192	0.397032
lcl|NC_013849.1_cds_WP_012965050.1_521	0.365496	0.721046	0.403588
lcl|NC_013849.1_cds_WP_012965051.1_522	0.319313	0.616993	0.350102
lcl|NC_013849.1_cds_WP_012965052.1_523	0.342393	0.616897	0.368863
lcl|NC_013849.1_cds_WP_012965053.1_524	0.352707	0.638645	0.387652
lcl|NC_013849.1_cds_WP_012965054.1_525	0.365111	0.612618	0.398651
lcl|NC_013849.1_cds_WP_012965055.1_526	0.337907	0.663465	0.366849
lcl|NC_013849.1_cds_WP_012965057.1_527	0.366168	0.585014	0.399278
lcl|NC_013849.1_cds_WP_012965058.1_528	0.335399	0.626262	0.360189
lcl|NC_013849.1_cds_WP_012965059.1_529	0.313174	0.573074	0.327158
lcl|NC_013849.1_cds_WP_012965060.1_530	0.328779	0.565487	0.34485
lcl|NC_013849.1_cds_WP_012965061.1_531	0.31812	0.59797	0.335415
lcl|NC_013849.1_cds_WP_012965063.1_532	0.372123	0.632011	0.409727
lcl|NC_013849.1_cds_WP_012965064.1_533	0.350368	0.600803	0.379958
lcl|NC_013849.1_cds_WP_012965066.1_535	0.320752	0.611022	0.341251
lcl|NC_013849.1_cds_WP_012965068.1_536	0.305293	0.62714	0.323695
lcl|NC_013849.1_cds_WP_012965071.1_537	0.354549	0.629467	0.38571
lcl|NC_013849.1_cds_WP_012965072.1_538	0.337073	0.604281	0.364094
lcl|NC_013849.1_cds_WP_012965074.1_541	0.349465	0.609022	0.380386
lcl|NC_013849.1_cds_WP_012965075.1_542	0.336224	0.621461	0.366315
lcl|NC_013849.1_cds_WP_012965076.1_543	0.381473	0.670723	0.42929
lcl|NC_013849.1_cds_WP_012965077.1_544	0.361631	0.566428	0.396364
lcl|NC_013849.1_cds_WP_012965079.1_546	0.326601	0.61476	0.35488
lcl|NC_013849.1_cds_WP_012965081.1_548	0.376014	0.528037	0.411917
lcl|NC_013849.1_cds_WP_012965082.1_549	0.338576	0.560876	0.36224
lcl|NC_013849.1_cds_WP_012965083.1_550	0.35309	0.663049	0.379122
lcl|NC_013849.1_cds_WP_012965084.1_551	0.309119	0.5496	0.320013
lcl|NC_013849.1_cds_WP_012965085.1_552	0.390569	0.676052	0.42829
lcl|NC_013849.1_cds_WP_012965086.1_553	0.372021	0.601538	0.411921
lcl|NC_013849.1_cds_WP_012965087.1_554	0.373439	0.624921	0.405017
lcl|NC_013849.1_cds_WP_012965088.1_555	0.347775	0.647482	0.376894
lcl|NC_013849.1_cds_WP_012965089.1_556	0.36751	0.594945	0.397645
lcl|NC_013849.1_cds_WP_012965090.1_557	0.385822	0.655044	0.426874
lcl|NC_013849.1_cds_WP_012965092.1_559	0.36025	0.629621	0.394759
lcl|NC_013849.1_cds_WP_012965094.1_561	0.363239	0.586755	0.394425
lcl|NC_013849.1_cds_WP_012965096.1_562	0.334209	0.571854	0.356257
lcl|NC_013849.1_cds_WP_012965098.1_564	0.366737	0.585082	0.408785
lcl|NC_013849.1_cds_WP_012965099.1_565	0.353225	0.581021	0.379995
lcl|NC_013849.1_cds_WP_012965100.1_566	0.359421	0.644278	0.386135
lcl|NC_013849.1_cds_WP_012965101.1_567	0.351469	0.536403	0.385467
lcl|NC_013849.1_cds_WP_012965103.1_569	0.350627	0.665991	0.385226
lcl|NC_013849.1_cds_WP_012965104.1_570	0.329421	0.600156	0.347275
lcl|NC_013849.1_cds_WP_012965105.1_571	0.364464	0.634269	0.400589
lcl|NC_013849.1_cds_WP_012965108.1_574	0.359853	0.596472	0.390908
lcl|NC_013849.1_cds_WP_012965110.1_576	0.331012	0.706697	0.355289
lcl|NC_013849.1_cds_WP_012965111.1_577	0.318721	0.699054	0.340229
lcl|NC_013849.1_cds_WP_012965112.1_578	0.336321	0.744552	0.369101
lcl|NC_013849.1_cds_WP_012965113.1_579	0.340593	0.665209	0.36768
lcl|NC_013849.1_cds_WP_012965114.1_580	0.3727	0.730947	0.402855
lcl|NC_013849.1_cds_WP_012965115.1_581	0.337097	0.682982	0.362689
lcl|NC_013849.1_cds_WP_012965116.1_582	0.354844	0.747554	0.38583
lcl|NC_013849.1_cds_WP_012965117.1_583	0.340725	0.67461	0.362654
lcl|NC_013849.1_cds_WP_012965118.1_584	0.334789	0.697878	0.359732
lcl|NC_013849.1_cds_WP_012965119.1_585	0.319922	0.656036	0.347759
lcl|NC_013849.1_cds_WP_012965120.1_586	0.332233	0.68753	0.355256
lcl|NC_013849.1_cds_WP_012965121.1_587	0.342138	0.724563	0.36719
lcl|NC_013849.1_cds_WP_012965122.1_588	0.341969	0.723299	0.364555
lcl|NC_013849.1_cds_WP_012965123.1_589	0.334559	0.677919	0.359014
lcl|NC_013849.1_cds_WP_012965124.1_590	0.359831	0.741427	0.384962
lcl|NC_013849.1_cds_WP_012965125.1_591	0.34411	0.669471	0.371897
lcl|NC_013849.1_cds_WP_012965126.1_592	0.34933	0.680502	0.38005
lcl|NC_013849.1_cds_WP_012965127.1_594	0.356411	0.720148	0.383665
lcl|NC_013849.1_cds_WP_012965128.1_595	0.369165	0.730199	0.414097
lcl|NC_013849.1_cds_WP_012965129.1_596	0.346152	0.722099	0.367631
lcl|NC_013849.1_cds_WP_012965131.1_598	0.347656	0.682778	0.37373
lcl|NC_013849.1_cds_WP_012965132.1_599	0.340733	0.703595	0.36881
lcl|NC_013849.1_cds_WP_012965133.1_600	0.354637	0.678998	0.379987
lcl|NC_013849.1_cds_WP_012965134.1_601	0.335317	0.711878	0.360958
lcl|NC_013849.1_cds_WP_012965135.1_602	0.356038	0.696726	0.380831
lcl|NC_013849.1_cds_WP_012965136.1_603	0.393037	0.733765	0.425259
lcl|NC_013849.1_cds_WP_012965137.1_604	0.361452	0.702481	0.397086
lcl|NC_013849.1_cds_WP_012965139.1_606	0.341627	0.688439	0.364923
lcl|NC_013849.1_cds_WP_012965140.1_607	0.377746	0.776686	0.408916
lcl|NC_013849.1_cds_WP_012965141.1_608	0.313548	0.695035	0.332887
lcl|NC_013849.1_cds_WP_012965142.1_609	0.344304	0.683813	0.370203
lcl|NC_013849.1_cds_WP_012965143.1_610	0.349252	0.684435	0.374703
lcl|NC_013849.1_cds_WP_012965145.1_611	0.349875	0.687744	0.374958
lcl|NC_013849.1_cds_WP_012965146.1_612	0.332831	0.595731	0.35458
lcl|NC_013849.1_cds_WP_012965147.1_613	0.378804	0.698956	0.423847
lcl|NC_013849.1_cds_WP_012965148.1_614	0.352924	0.701888	0.381701
lcl|NC_013849.1_cds_WP_012965149.1_615	0.352994	0.720738	0.379367
lcl|NC_013849.1_cds_WP_012965150.1_616	0.332992	0.616266	0.352542
lcl|NC_013849.1_cds_WP_012965152.1_617	0.330261	0.650288	0.352889
lcl|NC_013849.1_cds_WP_012965153.1_618	0.326173	0.570338	0.339359
lcl|NC_013849.1_cds_WP_012965154.1_619	0.320619	0.569506	0.337913
lcl|NC_013849.1_cds_WP_012965157.1_621	0.329192	0.671125	0.357239
lcl|NC_013849.1_cds_WP_012965158.1_622	0.342057	0.635647	0.364321
lcl|NC_013849.1_cds_WP_012965159.1_623	0.329848	0.672492	0.357638
lcl|NC_013849.1_cds_WP_012965160.1_624	0.355624	0.725254	0.386856
lcl|NC_013849.1_cds_WP_012965162.1_626	0.358	0.701306	0.381787
lcl|NC_013849.1_cds_WP_012965163.1_627	0.355139	0.646627	0.374097
lcl|NC_013849.1_cds_WP_012965164.1_628	0.335425	0.676121	0.358625
lcl|NC_013849.1_cds_WP_012965165.1_629	0.333448	0.657066	0.35747
lcl|NC_013849.1_cds_WP_012965166.1_630	0.349216	0.680058	0.37132
lcl|NC_013849.1_cds_WP_012965167.1_631	0.317114	0.641945	0.338751
lcl|NC_013849.1_cds_WP_012965168.1_632	0.329138	0.728967	0.349563
lcl|NC_013849.1_cds_WP_012965169.1_633	0.340082	0.67846	0.362282
lcl|NC_013849.1_cds_WP_012965170.1_634	0.337424	0.671778	0.362996
lcl|NC_013849.1_cds_WP_012965172.1_636	0.331614	0.622668	0.351411
lcl|NC_013849.1_cds_WP_012965173.1_637	0.347954	0.700147	0.371869
lcl|NC_013849.1_cds_WP_012965174.1_638	0.356065	0.715164	0.385482
lcl|NC_013849.1_cds_WP_012965175.1_639	0.350619	0.651569	0.367545
lcl|NC_013849.1_cds_WP_012965176.1_640	0.330761	0.653237	0.357512
lcl|NC_013849.1_cds_WP_012965178.1_642	0.307768	0.618604	0.326329
lcl|NC_013849.1_cds_WP_012965181.1_643	0.314423	0.623017	0.337415
lcl|NC_013849.1_cds_WP_012965182.1_644	0.329249	0.596701	0.346403
lcl|NC_013849.1_cds_WP_012965183.1_647	0.306655	0.605818	0.319974
lcl|NC_013849.1_cds_WP_012965184.1_648	0.301272	0.577687	0.315609
lcl|NC_013849.1_cds_WP_012965185.1_649	0.332001	0.646072	0.349408
lcl|NC_013849.1_cds_WP_012965186.1_650	0.347074	0.689421	0.368477
lcl|NC_013849.1_cds_WP_012965187.1_651	0.326084	0.631138	0.345229
lcl|NC_013849.1_cds_WP_012965188.1_652	0.308677	0.657292	0.325965
lcl|NC_013849.1_cds_WP_012965189.1_653	0.334779	0.66228	0.354181
lcl|NC_013849.1_cds_WP_012965190.1_654	0.319737	0.635059	0.335595
lcl|NC_013849.1_cds_WP_012965191.1_655	0.326524	0.639263	0.344153
lcl|NC_013849.1_cds_WP_012965194.1_658	0.337479	0.75733	0.361778
lcl|NC_013849.1_cds_WP_012965195.1_659	0.371538	0.641828	0.402881
lcl|NC_013849.1_cds_WP_012965196.1_660	0.33036	0.641264	0.358117
lcl|NC_013849.1_cds_WP_012965197.1_661	0.32214	0.680127	0.343476
lcl|NC_013849.1_cds_WP_012965199.1_663	0.33541	0.689542	0.355029
lcl|NC_013849.1_cds_WP_012965200.1_664	0.335261	0.735747	0.35776
lcl|NC_013849.1_cds_WP_012965201.1_665	0.338589	0.711663	0.368955
lcl|NC_013849.1_cds_WP_012965202.1_666	0.365269	0.713355	0.403078
lcl|NC_013849.1_cds_WP_012965203.1_667	0.352147	0.744183	0.38466
lcl|NC_013849.1_cds_WP_012965204.1_668	0.356736	0.67544	0.384457
lcl|NC_013849.1_cds_WP_012965206.1_670	0.358963	0.7156	0.387109
lcl|NC_013849.1_cds_WP_012965207.1_672	0.335994	0.648121	0.363187
lcl|NC_013849.1_cds_WP_012965208.1_673	0.31995	0.615078	0.342774
lcl|NC_013849.1_cds_WP_012965209.1_674	0.33498	0.760791	0.359807
lcl|NC_013849.1_cds_WP_012965210.1_675	0.354047	0.75782	0.38109
lcl|NC_013849.1_cds_WP_012965211.1_676	0.361184	0.684239	0.389841
lcl|NC_013849.1_cds_WP_012965212.1_677	0.350667	0.7052	0.381867
lcl|NC_013849.1_cds_WP_012965213.1_678	0.345787	0.736845	0.373915
lcl|NC_013849.1_cds_WP_012965214.1_679	0.35386	0.72612	0.382545
lcl|NC_013849.1_cds_WP_012965215.1_680	0.349064	0.712881	0.373389
lcl|NC_013849.1_cds_WP_012965216.1_681	0.343359	0.706445	0.366207
lcl|NC_013849.1_cds_WP_012965219.1_683	0.331073	0.643614	0.348931
lcl|NC_013849.1_cds_WP_012965220.1_684	0.34619	0.659498	0.374348
lcl|NC_013849.1_cds_WP_012965221.1_685	0.327439	0.625582	0.346998
lcl|NC_013849.1_cds_WP_012965222.1_686	0.341232	0.699125	0.366227
lcl|NC_013849.1_cds_WP_012965223.1_687	0.318721	0.644978	0.341585
lcl|NC_013849.1_cds_WP_012965224.1_688	0.341588	0.680646	0.359024
lcl|NC_013849.1_cds_WP_012965225.1_689	0.356331	0.696246	0.384079
lcl|NC_013849.1_cds_WP_012965226.1_690	0.335377	0.701243	0.356691
lcl|NC_013849.1_cds_WP_012965227.1_691	0.338492	0.706268	0.367007
lcl|NC_013849.1_cds_WP_012965228.1_692	0.343275	0.645214	0.361409
lcl|NC_013849.1_cds_WP_012965229.1_693	0.357497	0.583273	0.378269
lcl|NC_013849.1_cds_WP_012965230.1_694	0.340169	0.640516	0.362437
lcl|NC_013849.1_cds_WP_012965231.1_695	0.35502	0.658272	0.37449
lcl|NC_013849.1_cds_WP_012965232.1_696	0.385734	0.704489	0.415513
lcl|NC_013849.1_cds_WP_012965234.1_698	0.348803	0.667468	0.37457
lcl|NC_013849.1_cds_WP_012965235.1_699	0.355995	0.649197	0.378865
lcl|NC_013849.1_cds_WP_012965236.1_700	0.340347	0.630185	0.354224
lcl|NC_013849.1_cds_WP_012965237.1_701	0.35073	0.670493	0.377449
lcl|NC_013849.1_cds_WP_012965238.1_702	0.337393	0.651636	0.361768
lcl|NC_013849.1_cds_WP_012965239.1_703	0.332818	0.724485	0.354907
lcl|NC_013849.1_cds_WP_012965240.1_704	0.353202	0.720734	0.379804
lcl|NC_013849.1_cds_WP_012965241.1_706	0.331939	0.708409	0.354746
lcl|NC_013849.1_cds_WP_012965243.1_708	0.325844	0.659449	0.343867
lcl|NC_013849.1_cds_WP_012965244.1_709	0.34996	0.702334	0.378374
lcl|NC_013849.1_cds_WP_012965246.1_711	0.362908	0.728127	0.393524
lcl|NC_013849.1_cds_WP_012965247.1_712	0.350511	0.705179	0.38032
lcl|NC_013849.1_cds_WP_012965248.1_713	0.351488	0.716495	0.380615
lcl|NC_013849.1_cds_WP_012965249.1_714	0.337432	0.707652	0.360688
lcl|NC_013849.1_cds_WP_012965250.1_715	0.318988	0.686484	0.34136
lcl|NC_013849.1_cds_WP_012965251.1_716	0.339486	0.670814	0.365963
lcl|NC_013849.1_cds_WP_012965253.1_718	0.33126	0.592481	0.346351
lcl|NC_013849.1_cds_WP_012965255.1_720	0.334446	0.677327	0.363972
lcl|NC_013849.1_cds_WP_012965256.1_721	0.357148	0.70601	0.38574
lcl|NC_013849.1_cds_WP_012965257.1_722	0.332026	0.631901	0.358988
lcl|NC_013849.1_cds_WP_012965258.1_723	0.330661	0.687186	0.354188
lcl|NC_013849.1_cds_WP_012965259.1_724	0.348279	0.724572	0.381765
lcl|NC_013849.1_cds_WP_012965261.1_726	0.346815	0.6794	0.367953
lcl|NC_013849.1_cds_WP_012965263.1_728	0.345719	0.727953	0.375451
lcl|NC_013849.1_cds_WP_012965265.1_730	0.318785	0.650412	0.341691
lcl|NC_013849.1_cds_WP_012965266.1_731	0.335307	0.663941	0.3553
lcl|NC_013849.1_cds_WP_012965267.1_732	0.355388	0.722588	0.386839
lcl|NC_013849.1_cds_WP_012965268.1_733	0.366531	0.758904	0.399803
lcl|NC_013849.1_cds_WP_012965269.1_734	0.340845	0.734214	0.370639
lcl|NC_013849.1_cds_WP_012965270.1_735	0.36826	0.712562	0.402916
lcl|NC_013849.1_cds_WP_012965271.1_736	0.339194	0.708158	0.3645
lcl|NC_013849.1_cds_WP_012965272.1_737	0.351639	0.697925	0.386044
lcl|NC_013849.1_cds_WP_012965273.1_738	0.355602	0.731572	0.38688
lcl|NC_013849.1_cds_WP_012965274.1_739	0.357132	0.718025	0.386382
lcl|NC_013849.1_cds_WP_012965275.1_740	0.355426	0.7003	0.385688
lcl|NC_013849.1_cds_WP_012965276.1_741	0.358537	0.702408	0.384191
lcl|NC_013849.1_cds_WP_012965277.1_742	0.298738	0.728133	0.321093
lcl|NC_013849.1_cds_WP_012965279.1_744	0.333843	0.660923	0.35649
lcl|NC_013849.1_cds_WP_012965280.1_745	0.343098	0.776905	0.378941
lcl|NC_013849.1_cds_WP_012965281.1_746	0.336857	0.671569	0.359278
lcl|NC_013849.1_cds_WP_012965283.1_748	0.349381	0.689653	0.383216
lcl|NC_013849.1_cds_WP_012965284.1_750	0.343552	0.72654	0.36728
lcl|NC_013849.1_cds_WP_012965285.1_751	0.352273	0.719002	0.381126
lcl|NC_013849.1_cds_WP_012965286.1_752	0.341113	0.732133	0.36624
lcl|NC_013849.1_cds_WP_012965287.1_753	0.363123	0.685026	0.393197
lcl|NC_013849.1_cds_WP_012965288.1_754	0.348737	0.713343	0.379733
lcl|NC_013849.1_cds_WP_012965289.1_755	0.340889	0.69454	0.36819
lcl|NC_013849.1_cds_WP_012965290.1_756	0.338659	0.658322	0.365999
lcl|NC_013849.1_cds_WP_012965292.1_758	0.355659	0.771202	0.389671
lcl|NC_013849.1_cds_WP_012965294.1_760	0.346081	0.686161	0.373194
lcl|NC_013849.1_cds_WP_012965296.1_762	0.372402	0.700548	0.401631
lcl|NC_013849.1_cds_WP_012965298.1_764	0.345828	0.724527	0.370326
lcl|NC_013849.1_cds_WP_012965299.1_765	0.350327	0.718758	0.377668
lcl|NC_013849.1_cds_WP_012965300.1_766	0.342167	0.715601	0.364002
lcl|NC_013849.1_cds_WP_012965301.1_767	0.388373	0.601004	0.411953
lcl|NC_013849.1_cds_WP_012965303.1_769	0.341859	0.649891	0.363916
lcl|NC_013849.1_cds_WP_012965304.1_770	0.326839	0.678705	0.338471
lcl|NC_013849.1_cds_WP_012965305.1_771	0.324889	0.576764	0.341728
lcl|NC_013849.1_cds_WP_012965306.1_772	0.3478	0.684695	0.375767
lcl|NC_013849.1_cds_WP_012965307.1_773	0.340466	0.644262	0.359872
lcl|NC_013849.1_cds_WP_012965308.1_774	0.331754	0.696324	0.351941
lcl|NC_013849.1_cds_WP_012965310.1_777	0.35952	0.689178	0.393267
lcl|NC_013849.1_cds_WP_012965312.1_779	0.330007	0.658008	0.350849
lcl|NC_013849.1_cds_WP_012965313.1_780	0.349204	0.67999	0.376617
lcl|NC_013849.1_cds_WP_012965314.1_781	0.331671	0.656307	0.358799
lcl|NC_013849.1_cds_WP_012965315.1_782	0.327914	0.68324	0.352494
lcl|NC_013849.1_cds_WP_012965316.1_783	0.306738	0.62258	0.323935
lcl|NC_013849.1_cds_WP_012965317.1_784	0.350329	0.728282	0.374808
lcl|NC_013849.1_cds_WP_012965318.1_785	0.349795	0.588323	0.367645
lcl|NC_013849.1_cds_WP_012965319.1_786	0.331909	0.706801	0.357137
lcl|NC_013849.1_cds_WP_012965321.1_788	0.357931	0.714656	0.388677
lcl|NC_013849.1_cds_WP_012965322.1_789	0.337073	0.662016	0.363051
lcl|NC_013849.1_cds_WP_012965323.1_790	0.34609	0.710789	0.374485
lcl|NC_013849.1_cds_WP_012965324.1_791	0.337141	0.668921	0.35769
lcl|NC_013849.1_cds_WP_012965325.1_792	0.345198	0.699589	0.372226
lcl|NC_013849.1_cds_WP_012965326.1_793	0.316804	0.652551	0.339413
lcl|NC_013849.1_cds_WP_012965327.1_794	0.366577	0.752065	0.402826
lcl|NC_013849.1_cds_WP_012965328.1_795	0.31767	0.622634	0.342128
lcl|NC_013849.1_cds_WP_012965329.1_796	0.334211	0.706742	0.35302
lcl|NC_013849.1_cds_WP_012965330.1_797	0.338126	0.662084	0.3651
lcl|NC_013849.1_cds_WP_012965331.1_798	0.331343	0.626807	0.352857
lcl|NC_013849.1_cds_WP_012965332.1_799	0.349214	0.711819	0.379262
lcl|NC_013849.1_cds_WP_012965333.1_800	0.34877	0.694101	0.382292
lcl|NC_013849.1_cds_WP_012965334.1_801	0.321046	0.656606	0.339507
lcl|NC_013849.1_cds_WP_012965335.1_802	0.339253	0.708512	0.358798
lcl|NC_013849.1_cds_WP_012965337.1_804	0.353997	0.730487	0.383267
lcl|NC_013849.1_cds_WP_012965338.1_805	0.355572	0.689803	0.381263
lcl|NC_013849.1_cds_WP_012965339.1_806	0.33836	0.66924	0.365932
lcl|NC_013849.1_cds_WP_012965340.1_807	0.341592	0.680458	0.362286
lcl|NC_013849.1_cds_WP_012965341.1_808	0.345759	0.620046	0.370929
lcl|NC_013849.1_cds_WP_012965342.1_809	0.363246	0.672094	0.394078
lcl|NC_013849.1_cds_WP_012965343.1_810	0.338222	0.662018	0.36042
lcl|NC_013849.1_cds_WP_012965344.1_811	0.342104	0.698761	0.362575
lcl|NC_013849.1_cds_WP_012965345.1_812	0.347253	0.662523	0.366801
lcl|NC_013849.1_cds_WP_012965346.1_813	0.314552	0.62906	0.333374
lcl|NC_013849.1_cds_WP_012965347.1_814	0.328976	0.6597	0.350094
lcl|NC_013849.1_cds_WP_012965348.1_815	0.322493	0.661059	0.339193
lcl|NC_013849.1_cds_WP_012965350.1_817	0.328393	0.640629	0.349606
lcl|NC_013849.1_cds_WP_012965351.1_818	0.322598	0.673622	0.345535
lcl|NC_013849.1_cds_WP_012965352.1_819	0.337762	0.661527	0.35981
lcl|NC_013849.1_cds_WP_012965354.1_821	0.357113	0.680981	0.383532
lcl|NC_013849.1_cds_WP_012965355.1_822	0.353308	0.648031	0.37412
lcl|NC_013849.1_cds_WP_012965356.1_823	0.341191	0.678092	0.36598
lcl|NC_013849.1_cds_WP_012965357.1_824	0.326431	0.685852	0.35444
lcl|NC_013849.1_cds_WP_012965358.1_825	0.35754	0.725962	0.392798
lcl|NC_013849.1_cds_WP_012965359.1_826	0.379636	0.722954	0.41757
lcl|NC_013849.1_cds_WP_012965361.1_828	0.327743	0.638046	0.354003
lcl|NC_013849.1_cds_WP_012965362.1_829	0.356512	0.722483	0.378913
lcl|NC_013849.1_cds_WP_012965363.1_830	0.317915	0.687083	0.333781
lcl|NC_013849.1_cds_WP_012965364.1_831	0.337595	0.683519	0.35928
lcl|NC_013849.1_cds_WP_012965365.1_832	0.334687	0.678041	0.36077
lcl|NC_013849.1_cds_WP_012965366.1_833	0.333289	0.641454	0.358881
lcl|NC_013849.1_cds_WP_012965367.1_834	0.338125	0.666079	0.368797
lcl|NC_013849.1_cds_WP_012965368.1_835	0.311855	0.688246	0.335466
lcl|NC_013849.1_cds_WP_012965369.1_836	0.344017	0.71102	0.374293
lcl|NC_013849.1_cds_WP_012965370.1_837	0.328212	0.62743	0.34564
lcl|NC_013849.1_cds_WP_012965371.1_838	0.335962	0.649823	0.359473
lcl|NC_013849.1_cds_WP_012965372.1_839	0.322311	0.649977	0.347603
lcl|NC_013849.1_cds_WP_012965373.1_840	0.349912	0.708455	0.375409
lcl|NC_013849.1_cds_WP_012965374.1_841	0.320138	0.636853	0.342495
lcl|NC_013849.1_cds_WP_012965376.1_844	0.347789	0.641623	0.370928
lcl|NC_013849.1_cds_WP_012965378.1_846	0.335337	0.601094	0.353619
lcl|NC_013849.1_cds_WP_012965379.1_847	0.333614	0.668577	0.360419
lcl|NC_013849.1_cds_WP_012965381.1_848	0.334647	0.681536	0.362246
lcl|NC_013849.1_cds_WP_012965382.1_849	0.383715	0.711648	0.419137
lcl|NC_013849.1_cds_WP_012965383.1_850	0.329561	0.679719	0.34906
lcl|NC_013849.1_cds_WP_012965384.1_851	0.348091	0.707907	0.383431
lcl|NC_013849.1_cds_WP_012965386.1_853	0.34402	0.683664	0.374022
lcl|NC_013849.1_cds_WP_012965389.1_856	0.354676	0.723437	0.378844
lcl|NC_013849.1_cds_WP_012965390.1_857	0.344001	0.669178	0.373407
lcl|NC_013849.1_cds_WP_012965391.1_858	0.349939	0.743932	0.380897
lcl|NC_013849.1_cds_WP_012965392.1_859	0.347773	0.717857	0.373904
lcl|NC_013849.1_cds_WP_012965393.1_860	0.349296	0.660116	0.376893
lcl|NC_013849.1_cds_WP_012965394.1_861	0.376375	0.721434	0.406325
lcl|NC_013849.1_cds_WP_012965398.1_864	0.329329	0.687773	0.353343
lcl|NC_013849.1_cds_WP_012965399.1_865	0.348193	0.707713	0.376137
lcl|NC_013849.1_cds_WP_012965401.1_866	0.355895	0.723799	0.38074
lcl|NC_013849.1_cds_WP_012965402.1_867	0.351279	0.733977	0.378698
lcl|NC_013849.1_cds_WP_012965405.1_870	0.342012	0.657595	0.369653
lcl|NC_013849.1_cds_WP_012965406.1_871	0.343104	0.685949	0.367172
lcl|NC_013849.1_cds_WP_012965407.1_872	0.343683	0.714945	0.370361
lcl|NC_013849.1_cds_WP_012965408.1_873	0.338323	0.66804	0.364306
lcl|NC_013849.1_cds_WP_012965409.1_874	0.34583	0.687057	0.371036
lcl|NC_013849.1_cds_WP_012965410.1_875	0.344179	0.725694	0.361752
lcl|NC_013849.1_cds_WP_012965411.1_876	0.331639	0.708681	0.357616
lcl|NC_013849.1_cds_WP_012965412.1_877	0.324502	0.687888	0.350873
lcl|NC_013849.1_cds_WP_012965413.1_878	0.354811	0.726479	0.380959
lcl|NC_013849.1_cds_WP_012965414.1_879	0.335184	0.707392	0.357608
lcl|NC_013849.1_cds_WP_012965415.1_880	0.349156	0.659739	0.376915
lcl|NC_013849.1_cds_WP_012965416.1_881	0.344807	0.642433	0.375499
lcl|NC_013849.1_cds_WP_012965417.1_883	0.318789	0.64417	0.339471
lcl|NC_013849.1_cds_WP_012965421.1_886	0.340319	0.711984	0.361854
lcl|NC_013849.1_cds_WP_012965422.1_887	0.355376	0.694379	0.38453
lcl|NC_013849.1_cds_WP_012965423.1_888	0.348235	0.699046	0.373842
lcl|NC_013849.1_cds_WP_012965424.1_889	0.337435	0.644455	0.361625
lcl|NC_013849.1_cds_WP_012965425.1_890	0.356665	0.777461	0.380782
lcl|NC_013849.1_cds_WP_012965426.1_891	0.323907	0.700921	0.349163
lcl|NC_013849.1_cds_WP_012965427.1_892	0.374561	0.725017	0.407721
lcl|NC_013849.1_cds_WP_012965428.1_893	0.329479	0.681902	0.352139
lcl|NC_013849.1_cds_WP_012965429.1_894	0.372901	0.701441	0.412291
lcl|NC_013849.1_cds_WP_012965430.1_895	0.325769	0.652087	0.346054
lcl|NC_013849.1_cds_WP_012965431.1_896	0.321603	0.666205	0.340816
lcl|NC_013849.1_cds_WP_012965432.1_897	0.36143	0.677795	0.396983
lcl|NC_013849.1_cds_WP_012965433.1_898	0.324688	0.648273	0.345486
lcl|NC_013849.1_cds_WP_012965434.1_899	0.334659	0.614842	0.352477
lcl|NC_013849.1_cds_WP_012965435.1_900	0.340767	0.631005	0.366466
lcl|NC_013849.1_cds_WP_012965436.1_901	0.335348	0.700144	0.360897
lcl|NC_013849.1_cds_WP_012965437.1_902	0.361124	0.735014	0.390089
lcl|NC_013849.1_cds_WP_012965438.1_903	0.338209	0.689081	0.367039
lcl|NC_013849.1_cds_WP_012965439.1_904	0.364575	0.717386	0.396369
lcl|NC_013849.1_cds_WP_012965440.1_905	0.351892	0.66633	0.375661
lcl|NC_013849.1_cds_WP_012965441.1_906	0.351762	0.658201	0.376077
lcl|NC_013849.1_cds_WP_012965442.1_907	0.353199	0.64203	0.386051
lcl|NC_013849.1_cds_WP_012965443.1_908	0.355856	0.701396	0.387266
lcl|NC_013849.1_cds_WP_012965444.1_909	0.345878	0.722726	0.374417
lcl|NC_013849.1_cds_WP_012965446.1_912	0.3582	0.70185	0.385048
lcl|NC_013849.1_cds_WP_012965447.1_913	0.335433	0.737972	0.361316
lcl|NC_013849.1_cds_WP_012965448.1_914	0.335378	0.622618	0.359897
lcl|NC_013849.1_cds_WP_012965449.1_915	0.349241	0.65979	0.373632
lcl|NC_013849.1_cds_WP_012965450.1_916	0.342778	0.722707	0.364812
lcl|NC_013849.1_cds_WP_012965451.1_917	0.332814	0.689514	0.354448
lcl|NC_013849.1_cds_WP_012965453.1_919	0.32745	0.675355	0.349682
lcl|NC_013849.1_cds_WP_012965455.1_921	0.366268	0.716073	0.40036
lcl|NC_013849.1_cds_WP_012965456.1_922	0.349525	0.712023	0.377005
lcl|NC_013849.1_cds_WP_012965457.1_923	0.337305	0.665963	0.364603
lcl|NC_013849.1_cds_WP_012965458.1_924	0.346711	0.682329	0.371183
lcl|NC_013849.1_cds_WP_012965460.1_926	0.334043	0.719326	0.360704
lcl|NC_013849.1_cds_WP_012965462.1_928	0.34029	0.71561	0.369965
lcl|NC_013849.1_cds_WP_012965464.1_931	0.342559	0.626829	0.362671
lcl|NC_013849.1_cds_WP_012965467.1_933	0.338043	0.684182	0.37034
lcl|NC_013849.1_cds_WP_012965468.1_934	0.352783	0.684184	0.382684
lcl|NC_013849.1_cds_WP_012965469.1_935	0.350609	0.72818	0.377765
lcl|NC_013849.1_cds_WP_012965470.1_936	0.336365	0.648866	0.356414
lcl|NC_013849.1_cds_WP_012965471.1_937	0.35385	0.640438	0.379007
lcl|NC_013849.1_cds_WP_012965472.1_938	0.351485	0.734024	0.37974
lcl|NC_013849.1_cds_WP_012965473.1_939	0.313602	0.727847	0.336317
lcl|NC_013849.1_cds_WP_012965474.1_940	0.361469	0.759382	0.393715
lcl|NC_013849.1_cds_WP_012965476.1_942	0.346457	0.723191	0.374433
lcl|NC_013849.1_cds_WP_012965477.1_943	0.346064	0.664104	0.364665
lcl|NC_013849.1_cds_WP_012965479.1_944	0.342025	0.703115	0.361057
lcl|NC_013849.1_cds_WP_012965480.1_945	0.335013	0.669704	0.362766
lcl|NC_013849.1_cds_WP_012965481.1_946	0.347456	0.721296	0.369772
lcl|NC_013849.1_cds_WP_012965482.1_947	0.332712	0.743731	0.351735
lcl|NC_013849.1_cds_WP_012965483.1_948	0.356436	0.689711	0.386668
lcl|NC_013849.1_cds_WP_012965484.1_949	0.336376	0.675173	0.357419
lcl|NC_013849.1_cds_WP_012965485.1_950	0.336771	0.674983	0.365633
lcl|NC_013849.1_cds_WP_012965486.1_951	0.37774	0.734305	0.40881
lcl|NC_013849.1_cds_WP_012965487.1_952	0.333393	0.672603	0.35952
lcl|NC_013849.1_cds_WP_012965488.1_953	0.342742	0.582788	0.368837
lcl|NC_013849.1_cds_WP_012965489.1_954	0.351202	0.677691	0.388683
lcl|NC_013849.1_cds_WP_012965490.1_955	0.351895	0.670087	0.384765
lcl|NC_013849.1_cds_WP_012965491.1_956	0.357628	0.71844	0.388411
lcl|NC_013849.1_cds_WP_012965492.1_957	0.397872	0.769073	0.435769
lcl|NC_013849.1_cds_WP_012965493.1_2279	0.358741	0.698991	0.401491
lcl|NC_013849.1_cds_WP_012965493.1_958	0.358741	0.698991	0.401491
lcl|NC_013849.1_cds_WP_012965494.1_959	0.333455	0.668096	0.360668
lcl|NC_013849.1_cds_WP_012965495.1_960	0.330618	0.521941	0.352596
lcl|NC_013849.1_cds_WP_012965497.1_962	0.35635	0.707109	0.383265
lcl|NC_013849.1_cds_WP_012965498.1_963	0.343362	0.640134	0.362531
lcl|NC_013849.1_cds_WP_012965499.1_964	0.358956	0.719142	0.390173
lcl|NC_013849.1_cds_WP_012965500.1_965	0.346828	0.74115	0.374171
lcl|NC_013849.1_cds_WP_012965501.1_966	0.330779	0.688736	0.350781
lcl|NC_013849.1_cds_WP_012965502.1_967	0.352517	0.677244	0.379251
lcl|NC_013849.1_cds_WP_012965503.1_968	0.325942	0.634758	0.352742
lcl|NC_013849.1_cds_WP_012965504.1_969	0.344743	0.675172	0.372025
lcl|NC_013849.1_cds_WP_012965505.1_970	0.341596	0.584849	0.360033
lcl|NC_013849.1_cds_WP_012965506.1_971	0.330997	0.700025	0.359784
lcl|NC_013849.1_cds_WP_012965507.1_972	0.350229	0.708769	0.379414
lcl|NC_013849.1_cds_WP_012965508.1_973	0.355267	0.711981	0.386912
lcl|NC_013849.1_cds_WP_012965509.1_974	0.33608	0.698916	0.358988
lcl|NC_013849.1_cds_WP_012965510.1_975	0.334608	0.667049	0.354227
lcl|NC_013849.1_cds_WP_012965511.1_976	0.345536	0.659429	0.367106
lcl|NC_013849.1_cds_WP_012965512.1_977	0.3448	0.606355	0.36498
lcl|NC_013849.1_cds_WP_012965513.1_978	0.305741	0.60342	0.32886
lcl|NC_013849.1_cds_WP_012965517.1_982	0.320646	0.660101	0.337309
lcl|NC_013849.1_cds_WP_012965518.1_983	0.345053	0.702046	0.367748
lcl|NC_013849.1_cds_WP_012965520.1_985	0.339124	0.716908	0.356481
lcl|NC_013849.1_cds_WP_012965521.1_986	0.318216	0.585165	0.338641
lcl|NC_013849.1_cds_WP_012965523.1_987	0.341463	0.742824	0.370076
lcl|NC_013849.1_cds_WP_012965524.1_988	0.330033	0.664423	0.351885
lcl|NC_013849.1_cds_WP_012965526.1_990	0.327178	0.652867	0.355369
lcl|NC_013849.1_cds_WP_012965527.1_991	0.33464	0.663166	0.364797
lcl|NC_013849.1_cds_WP_012965528.1_992	0.344566	0.658895	0.37263
lcl|NC_013849.1_cds_WP_012965529.1_993	0.336246	0.629706	0.359526
lcl|NC_013849.1_cds_WP_012965530.1_994	0.349274	0.689063	0.377603
lcl|NC_013849.1_cds_WP_012965531.1_995	0.347591	0.713159	0.372071
lcl|NC_013849.1_cds_WP_012965532.1_996	0.367124	0.726755	0.39792
lcl|NC_013849.1_cds_WP_012965533.1_997	0.357895	0.714871	0.385311
lcl|NC_013849.1_cds_WP_012965534.1_998	0.364316	0.793008	0.402503
lcl|NC_013849.1_cds_WP_012965535.1_999	0.324055	0.66381	0.347033
lcl|NC_013849.1_cds_WP_012965536.1_1000	0.339203	0.701887	0.365676
lcl|NC_013849.1_cds_WP_012965537.1_1001	0.336367	0.633542	0.356986
lcl|NC_013849.1_cds_WP_012965538.1_1002	0.336767	0.688748	0.364193
lcl|NC_013849.1_cds_WP_012965539.1_1003	0.336404	0.664903	0.354001
lcl|NC_013849.1_cds_WP_012965541.1_1005	0.366201	0.701773	0.399011
lcl|NC_013849.1_cds_WP_012965542.1_1006	0.37659	0.777122	0.407884
lcl|NC_013849.1_cds_WP_012965544.1_1008	0.314421	0.635545	0.336125
lcl|NC_013849.1_cds_WP_012965545.1_1009	0.369786	0.698368	0.398726
lcl|NC_013849.1_cds_WP_012965546.1_1010	0.316348	0.693956	0.33516
lcl|NC_013849.1_cds_WP_012965547.1_1011	0.34976	0.69172	0.375273
lcl|NC_013849.1_cds_WP_012965548.1_1012	0.346207	0.64736	0.375683
lcl|NC_013849.1_cds_WP_012965549.1_1013	0.351299	0.713982	0.381458
lcl|NC_013849.1_cds_WP_012965550.1_1014	0.335811	0.612417	0.354992
lcl|NC_013849.1_cds_WP_012965551.1_1015	0.326013	0.656135	0.345265
lcl|NC_013849.1_cds_WP_012965555.1_1019	0.358622	0.735233	0.397474
lcl|NC_013849.1_cds_WP_012965556.1_1020	0.353216	0.697042	0.377667
lcl|NC_013849.1_cds_WP_012965557.1_1021	0.344498	0.701747	0.372724
lcl|NC_013849.1_cds_WP_012965558.1_1022	0.342625	0.670619	0.3739
lcl|NC_013849.1_cds_WP_012965559.1_1023	0.345468	0.72316	0.373374
lcl|NC_013849.1_cds_WP_012965560.1_1024	0.353679	0.684487	0.38809
lcl|NC_013849.1_cds_WP_012965561.1_1025	0.344386	0.706989	0.369766
lcl|NC_013849.1_cds_WP_012965562.1_1026	0.338572	0.625742	0.363582
lcl|NC_013849.1_cds_WP_012965563.1_1027	0.352665	0.597777	0.383153
lcl|NC_013849.1_cds_WP_012965564.1_1028	0.318543	0.602824	0.342268
lcl|NC_013849.1_cds_WP_012965565.1_1029	0.318504	0.597281	0.338109
lcl|NC_013849.1_cds_WP_012965566.1_1030	0.339305	0.662122	0.368801
lcl|NC_013849.1_cds_WP_012965569.1_1033	0.305534	0.547307	0.321135
lcl|NC_013849.1_cds_WP_012965572.1_1036	0.320997	0.708419	0.352187
lcl|NC_013849.1_cds_WP_012965573.1_1037	0.347261	0.643232	0.386293
lcl|NC_013849.1_cds_WP_012965574.1_1038	0.318068	0.609164	0.339017
lcl|NC_013849.1_cds_WP_012965575.1_1039	0.316825	0.585212	0.339255
lcl|NC_013849.1_cds_WP_012965576.1_1040	0.31615	0.62635	0.337183
lcl|NC_013849.1_cds_WP_012965577.1_1041	0.314389	0.658125	0.336221
lcl|NC_013849.1_cds_WP_012965578.1_1042	0.30877	0.636388	0.328951
lcl|NC_013849.1_cds_WP_012965579.1_1043	0.346333	0.64679	0.37792
lcl|NC_013849.1_cds_WP_012965580.1_1044	0.3238	0.624955	0.344292
lcl|NC_013849.1_cds_WP_012965581.1_1045	0.32943	0.626378	0.359303
lcl|NC_013849.1_cds_WP_012965582.1_1046	0.295874	0.574705	0.314894
lcl|NC_013849.1_cds_WP_012965583.1_1047	0.325645	0.548957	0.343513
lcl|NC_013849.1_cds_WP_012965584.1_1048	0.336739	0.731845	0.365473
lcl|NC_013849.1_cds_WP_012965585.1_1049	0.345318	0.701677	0.367988
lcl|NC_013849.1_cds_WP_012965586.1_1050	0.344682	0.726607	0.368385
lcl|NC_013849.1_cds_WP_012965587.1_1051	0.358725	0.746207	0.39717
lcl|NC_013849.1_cds_WP_012965589.1_1053	0.334741	0.695379	0.361762
lcl|NC_013849.1_cds_WP_012965590.1_1054	0.339414	0.602734	0.360794
lcl|NC_013849.1_cds_WP_012965591.1_1055	0.361042	0.772463	0.398685
lcl|NC_013849.1_cds_WP_012965592.1_1056	0.327126	0.608528	0.34705
lcl|NC_013849.1_cds_WP_012965593.1_1057	0.356522	0.693187	0.39385
lcl|NC_013849.1_cds_WP_012965594.1_1058	0.343399	0.700373	0.368422
lcl|NC_013849.1_cds_WP_012965595.1_1059	0.360843	0.655552	0.389541
lcl|NC_013849.1_cds_WP_012965596.1_1060	0.348589	0.719935	0.371066
lcl|NC_013849.1_cds_WP_012965597.1_1061	0.367345	0.698715	0.396446
lcl|NC_013849.1_cds_WP_012965600.1_1064	0.345748	0.717509	0.368317
lcl|NC_013849.1_cds_WP_012965601.1_1065	0.324265	0.689096	0.340462
lcl|NC_013849.1_cds_WP_012965602.1_1066	0.359776	0.666645	0.384492
lcl|NC_013849.1_cds_WP_012965603.1_1067	0.333792	0.67809	0.363519
lcl|NC_013849.1_cds_WP_012965604.1_1068	0.377375	0.718347	0.416835
lcl|NC_013849.1_cds_WP_012965605.1_1069	0.325936	0.649434	0.347427
lcl|NC_013849.1_cds_WP_012965606.1_1070	0.346203	0.748276	0.375021
lcl|NC_013849.1_cds_WP_012965607.1_1071	0.350172	0.700598	0.379336
lcl|NC_013849.1_cds_WP_012965608.1_1072	0.349626	0.721404	0.380561
lcl|NC_013849.1_cds_WP_012965609.1_1073	0.356144	0.688478	0.385616
lcl|NC_013849.1_cds_WP_012965611.1_1074	0.326681	0.644038	0.350165
lcl|NC_013849.1_cds_WP_012965612.1_1075	0.328196	0.695476	0.347808
lcl|NC_013849.1_cds_WP_012965613.1_1076	0.318907	0.62346	0.332492
lcl|NC_013849.1_cds_WP_012965615.1_1078	0.31805	0.596544	0.339947
lcl|NC_013849.1_cds_WP_012965616.1_1079	0.32784	0.572073	0.347559
lcl|NC_013849.1_cds_WP_012965618.1_1081	0.350235	0.699155	0.393184
lcl|NC_013849.1_cds_WP_012965619.1_1082	0.33481	0.581246	0.357071
lcl|NC_013849.1_cds_WP_012965620.1_1083	0.326348	0.645871	0.346276
lcl|NC_013849.1_cds_WP_012965621.1_1084	0.354826	0.722472	0.388898
lcl|NC_013849.1_cds_WP_012965622.1_1085	0.313395	0.665303	0.329854
lcl|NC_013849.1_cds_WP_012965623.1_1086	0.345441	0.685728	0.378432
lcl|NC_013849.1_cds_WP_012965624.1_1087	0.34003	0.654583	0.361758
lcl|NC_013849.1_cds_WP_012965625.1_1088	0.339537	0.675897	0.367293
lcl|NC_013849.1_cds_WP_012965626.1_1089	0.332969	0.655637	0.356118
lcl|NC_013849.1_cds_WP_012965627.1_1090	0.330196	0.6449	0.350389
lcl|NC_013849.1_cds_WP_012965628.1_1091	0.330951	0.667623	0.356478
lcl|NC_013849.1_cds_WP_012965629.1_1092	0.345013	0.698751	0.381731
lcl|NC_013849.1_cds_WP_012965630.1_1093	0.331191	0.71902	0.357715
lcl|NC_013849.1_cds_WP_012965631.1_1094	0.322597	0.627995	0.340645
lcl|NC_013849.1_cds_WP_012965633.1_1096	0.324637	0.695575	0.345091
lcl|NC_013849.1_cds_WP_012965634.1_1097	0.313535	0.598993	0.329284
lcl|NC_013849.1_cds_WP_012965636.1_1099	0.329269	0.671077	0.355492
lcl|NC_013849.1_cds_WP_012965637.1_1100	0.352326	0.605157	0.38763
lcl|NC_013849.1_cds_WP_012965638.1_1101	0.349734	0.691849	0.378031
lcl|NC_013849.1_cds_WP_012965639.1_1102	0.330391	0.719683	0.357208
lcl|NC_013849.1_cds_WP_012965640.1_1103	0.362487	0.722791	0.407985
lcl|NC_013849.1_cds_WP_012965641.1_1104	0.308103	0.661277	0.329724
lcl|NC_013849.1_cds_WP_012965642.1_1105	0.367116	0.711233	0.404332
lcl|NC_013849.1_cds_WP_012965643.1_1106	0.368691	0.725758	0.410177
lcl|NC_013849.1_cds_WP_012965644.1_1107	0.356415	0.72255	0.386787
lcl|NC_013849.1_cds_WP_012965647.1_1110	0.362072	0.728065	0.402027
lcl|NC_013849.1_cds_WP_012965648.1_1111	0.335033	0.682928	0.370592
lcl|NC_013849.1_cds_WP_012965649.1_1112	0.358984	0.801011	0.394204
lcl|NC_013849.1_cds_WP_012965650.1_1113	0.335928	0.720699	0.361725
lcl|NC_013849.1_cds_WP_012965652.1_1115	0.350113	0.744766	0.375605
lcl|NC_013849.1_cds_WP_012965653.1_1116	0.356688	0.729048	0.380121
lcl|NC_013849.1_cds_WP_012965655.1_1118	0.374264	0.696016	0.408461
lcl|NC_013849.1_cds_WP_012965656.1_1119	0.352011	0.769517	0.382562
lcl|NC_013849.1_cds_WP_012965657.1_1120	0.355318	0.687913	0.380603
lcl|NC_013849.1_cds_WP_012965658.1_1121	0.345969	0.724309	0.370997
lcl|NC_013849.1_cds_WP_012965659.1_1122	0.364385	0.736222	0.398157
lcl|NC_013849.1_cds_WP_012965660.1_1123	0.362164	0.757671	0.392803
lcl|NC_013849.1_cds_WP_012965661.1_1124	0.351112	0.657249	0.37201
lcl|NC_013849.1_cds_WP_012965662.1_1125	0.372486	0.67394	0.395529
lcl|NC_013849.1_cds_WP_012965663.1_1126	0.358265	0.676399	0.387887
lcl|NC_013849.1_cds_WP_012965664.1_1127	0.352088	0.709263	0.378665
lcl|NC_013849.1_cds_WP_012965666.1_1129	0.335127	0.659408	0.3618
lcl|NC_013849.1_cds_WP_012965667.1_1130	0.344754	0.702002	0.369292
lcl|NC_013849.1_cds_WP_012965668.1_1131	0.34629	0.661543	0.370486
lcl|NC_013849.1_cds_WP_012965669.1_1132	0.350372	0.680398	0.382564
lcl|NC_013849.1_cds_WP_012965670.1_1134	0.344275	0.713543	0.368344
lcl|NC_013849.1_cds_WP_012965671.1_1135	0.329701	0.626326	0.345656
lcl|NC_013849.1_cds_WP_012965672.1_1136	0.342606	0.585356	0.362944
lcl|NC_013849.1_cds_WP_012965673.1_1137	0.340868	0.68461	0.367552
lcl|NC_013849.1_cds_WP_012965674.1_1138	0.343652	0.654793	0.36601
lcl|NC_013849.1_cds_WP_012965676.1_1140	0.322973	0.68849	0.352365
lcl|NC_013849.1_cds_WP_012965677.1_1141	0.33134	0.672336	0.351629
lcl|NC_013849.1_cds_WP_012965679.1_1143	0.360595	0.695757	0.393574
lcl|NC_013849.1_cds_WP_012965680.1_1144	0.349016	0.688355	0.378443
lcl|NC_013849.1_cds_WP_012965681.1_1145	0.329174	0.699104	0.352265
lcl|NC_013849.1_cds_WP_012965682.1_1146	0.372714	0.687757	0.398246
lcl|NC_013849.1_cds_WP_012965683.1_1147	0.330291	0.632665	0.349598
lcl|NC_013849.1_cds_WP_012965684.1_1148	0.35397	0.704166	0.382809
lcl|NC_013849.1_cds_WP_012965687.1_1151	0.323411	0.696028	0.346856
lcl|NC_013849.1_cds_WP_012965688.1_1152	0.343256	0.669473	0.369646
lcl|NC_013849.1_cds_WP_012965689.1_1153	0.342519	0.713368	0.370033
lcl|NC_013849.1_cds_WP_012965690.1_1154	0.355317	0.685897	0.38212
lcl|NC_013849.1_cds_WP_012965691.1_1155	0.349094	0.704781	0.375982
lcl|NC_013849.1_cds_WP_012965692.1_1156	0.363543	0.751285	0.393953
lcl|NC_013849.1_cds_WP_012965694.1_1158	0.336077	0.577191	0.35258
lcl|NC_013849.1_cds_WP_012965695.1_1159	0.29534	0.557417	0.310556
lcl|NC_013849.1_cds_WP_012965696.1_1160	0.339998	0.663917	0.363946
lcl|NC_013849.1_cds_WP_012965697.1_1161	0.314158	0.547279	0.329287
lcl|NC_013849.1_cds_WP_012965699.1_1162	0.340914	0.672656	0.363349
lcl|NC_013849.1_cds_WP_012965700.1_1163	0.347473	0.711197	0.37248
lcl|NC_013849.1_cds_WP_012965701.1_1164	0.349905	0.648275	0.377874
lcl|NC_013849.1_cds_WP_012965703.1_1166	0.322742	0.552766	0.339575
lcl|NC_013849.1_cds_WP_012965707.1_1167	0.326484	0.618009	0.345873
lcl|NC_013849.1_cds_WP_012965708.1_1168	0.340631	0.599015	0.3596
lcl|NC_013849.1_cds_WP_012965709.1_1169	0.339217	0.618816	0.359137
lcl|NC_013849.1_cds_WP_012965710.1_1170	0.312055	0.574551	0.328452
lcl|NC_013849.1_cds_WP_012965712.1_1172	0.325018	0.617089	0.344587
lcl|NC_013849.1_cds_WP_012965714.1_1174	0.298735	0.582167	0.311619
lcl|NC_013849.1_cds_WP_012965715.1_1175	0.340168	0.615331	0.363001
lcl|NC_013849.1_cds_WP_012965717.1_1177	0.337887	0.619171	0.356212
lcl|NC_013849.1_cds_WP_012965719.1_1179	0.353637	0.54067	0.37933
lcl|NC_013849.1_cds_WP_012965720.1_1180	0.322217	0.542964	0.337442
lcl|NC_013849.1_cds_WP_012965721.1_1181	0.348634	0.643791	0.37499
lcl|NC_013849.1_cds_WP_012965722.1_1183	0.365128	0.702249	0.406809
lcl|NC_013849.1_cds_WP_012965723.1_1185	0.33349	0.673085	0.361554
lcl|NC_013849.1_cds_WP_012965724.1_1186	0.32448	0.694144	0.348864
lcl|NC_013849.1_cds_WP_012965726.1_1188	0.327918	0.702284	0.349953
lcl|NC_013849.1_cds_WP_012965727.1_1189	0.332892	0.684706	0.360839
lcl|NC_013849.1_cds_WP_012965728.1_1190	0.35889	0.728856	0.39442
lcl|NC_013849.1_cds_WP_012965729.1_1191	0.360937	0.702218	0.390381
lcl|NC_013849.1_cds_WP_012965730.1_1193	0.336276	0.744478	0.364753
lcl|NC_013849.1_cds_WP_012965731.1_1194	0.360841	0.710756	0.39276
lcl|NC_013849.1_cds_WP_012965733.1_1195	0.335704	0.583819	0.358875
lcl|NC_013849.1_cds_WP_012965735.1_1197	0.337095	0.709151	0.362502
lcl|NC_013849.1_cds_WP_012965736.1_1198	0.311022	0.688439	0.333102
lcl|NC_013849.1_cds_WP_012965737.1_1199	0.34804	0.689707	0.377685
lcl|NC_013849.1_cds_WP_012965738.1_1200	0.353171	0.741286	0.381641
lcl|NC_013849.1_cds_WP_012965739.1_1201	0.336117	0.713512	0.361236
lcl|NC_013849.1_cds_WP_012965740.1_1202	0.351941	0.725732	0.378078
lcl|NC_013849.1_cds_WP_012965741.1_1203	0.331361	0.71559	0.353772
lcl|NC_013849.1_cds_WP_012965742.1_1204	0.357896	0.646707	0.381813
lcl|NC_013849.1_cds_WP_012965743.1_1205	0.331719	0.649638	0.34758
lcl|NC_013849.1_cds_WP_012965744.1_1206	0.35312	0.732286	0.381613
lcl|NC_013849.1_cds_WP_012965745.1_1207	0.319586	0.623061	0.33836
lcl|NC_013849.1_cds_WP_012965746.1_1208	0.335481	0.672021	0.366149
lcl|NC_013849.1_cds_WP_012965747.1_1209	0.345342	0.72574	0.375185
lcl|NC_013849.1_cds_WP_012965748.1_1210	0.33424	0.702508	0.356204
lcl|NC_013849.1_cds_WP_012965749.1_1211	0.35924	0.680131	0.384936
lcl|NC_013849.1_cds_WP_012965750.1_1212	0.319966	0.577487	0.333057
lcl|NC_013849.1_cds_WP_012965751.1_1213	0.347287	0.674578	0.376706
lcl|NC_013849.1_cds_WP_012965752.1_1214	0.354138	0.678119	0.378047
lcl|NC_013849.1_cds_WP_012965753.1_1215	0.336529	0.699626	0.356861
lcl|NC_013849.1_cds_WP_012965755.1_1217	0.353172	0.678429	0.37875
lcl|NC_013849.1_cds_WP_012965756.1_1218	0.350448	0.611474	0.373791
lcl|NC_013849.1_cds_WP_012965757.1_1219	0.331478	0.688816	0.352401
lcl|NC_013849.1_cds_WP_012965758.1_1220	0.348862	0.677149	0.373583
lcl|NC_013849.1_cds_WP_012965759.1_1221	0.345611	0.702987	0.374309
lcl|NC_013849.1_cds_WP_012965760.1_1222	0.338598	0.745703	0.366802
lcl|NC_013849.1_cds_WP_012965761.1_1223	0.339803	0.715715	0.364632
lcl|NC_013849.1_cds_WP_012965762.1_1224	0.357961	0.691217	0.387089
lcl|NC_013849.1_cds_WP_012965763.1_1225	0.361996	0.632571	0.388971
lcl|NC_013849.1_cds_WP_012965764.1_1226	0.328764	0.671961	0.350992
lcl|NC_013849.1_cds_WP_012965766.1_1228	0.360058	0.696503	0.380672
lcl|NC_013849.1_cds_WP_012965768.1_1230	0.384347	0.769921	0.425267
lcl|NC_013849.1_cds_WP_012965769.1_1231	0.345838	0.736408	0.371797
lcl|NC_013849.1_cds_WP_012965770.1_1232	0.350631	0.72945	0.381117
lcl|NC_013849.1_cds_WP_012965771.1_1233	0.321402	0.670256	0.34196
lcl|NC_013849.1_cds_WP_012965772.1_1234	0.312249	0.707334	0.333442
lcl|NC_013849.1_cds_WP_012965773.1_1235	0.382119	0.710684	0.422144
lcl|NC_013849.1_cds_WP_012965774.1_1236	0.343589	0.643284	0.375041
lcl|NC_013849.1_cds_WP_012965777.1_1239	0.364671	0.680075	0.395984
lcl|NC_013849.1_cds_WP_012965778.1_1240	0.345905	0.723727	0.371433
lcl|NC_013849.1_cds_WP_012965779.1_1241	0.335055	0.672833	0.363287
lcl|NC_013849.1_cds_WP_012965782.1_1244	0.34627	0.664628	0.368376
lcl|NC_013849.1_cds_WP_012965784.1_1246	0.342117	0.629572	0.364511
lcl|NC_013849.1_cds_WP_012965785.1_1247	0.340285	0.656562	0.368008
lcl|NC_013849.1_cds_WP_012965786.1_1248	0.362574	0.753058	0.393387
lcl|NC_013849.1_cds_WP_012965787.1_1249	0.355628	0.736857	0.388998
lcl|NC_013849.1_cds_WP_012965788.1_1250	0.360971	0.727663	0.396405
lcl|NC_013849.1_cds_WP_012965789.1_1251	0.358023	0.671787	0.387098
lcl|NC_013849.1_cds_WP_012965790.1_1252	0.332593	0.68345	0.354831
lcl|NC_013849.1_cds_WP_012965792.1_1254	0.336326	0.682261	0.360637
lcl|NC_013849.1_cds_WP_012965793.1_1255	0.349827	0.692138	0.371828
lcl|NC_013849.1_cds_WP_012965794.1_1256	0.338908	0.671529	0.368923
lcl|NC_013849.1_cds_WP_012965795.1_1257	0.353746	0.772698	0.388078
lcl|NC_013849.1_cds_WP_012965796.1_1258	0.345207	0.695846	0.36998
lcl|NC_013849.1_cds_WP_012965797.1_1259	0.331523	0.6378	0.354236
lcl|NC_013849.1_cds_WP_012965798.1_1260	0.324299	0.597149	0.342915
lcl|NC_013849.1_cds_WP_012965799.1_1261	0.3528	0.739332	0.385913
lcl|NC_013849.1_cds_WP_012965800.1_1262	0.346258	0.652867	0.379586
lcl|NC_013849.1_cds_WP_012965801.1_1263	0.333578	0.66634	0.359283
lcl|NC_013849.1_cds_WP_012965802.1_1264	0.344616	0.704324	0.377299
lcl|NC_013849.1_cds_WP_012965803.1_1265	0.320157	0.74426	0.340424
lcl|NC_013849.1_cds_WP_012965804.1_1266	0.336925	0.688798	0.361501
lcl|NC_013849.1_cds_WP_012965805.1_1267	0.338596	0.703836	0.366057
lcl|NC_013849.1_cds_WP_012965806.1_1268	0.337821	0.655134	0.3659
lcl|NC_013849.1_cds_WP_012965807.1_1269	0.343591	0.679055	0.372702
lcl|NC_013849.1_cds_WP_012965808.1_1270	0.324837	0.655765	0.347207
lcl|NC_013849.1_cds_WP_012965809.1_1271	0.341831	0.704501	0.370757
lcl|NC_013849.1_cds_WP_012965811.1_1274	0.348719	0.730735	0.379724
lcl|NC_013849.1_cds_WP_012965813.1_1275	0.337093	0.699275	0.358779
lcl|NC_013849.1_cds_WP_012965814.1_1276	0.332356	0.69484	0.356875
lcl|NC_013849.1_cds_WP_012965815.1_1277	0.356444	0.669643	0.385184
lcl|NC_013849.1_cds_WP_012965816.1_1278	0.356028	0.73647	0.387917
lcl|NC_013849.1_cds_WP_012965817.1_1279	0.337035	0.630061	0.362437
lcl|NC_013849.1_cds_WP_012965818.1_1280	0.346637	0.728577	0.372823
lcl|NC_013849.1_cds_WP_012965819.1_1281	0.345244	0.723031	0.370596
lcl|NC_013849.1_cds_WP_012965820.1_1282	0.339406	0.709316	0.364
lcl|NC_013849.1_cds_WP_012965821.1_1284	0.326463	0.626816	0.342255
lcl|NC_013849.1_cds_WP_012965822.1_1285	0.342494	0.688376	0.371289
lcl|NC_013849.1_cds_WP_012965823.1_1286	0.331855	0.705401	0.357421
lcl|NC_013849.1_cds_WP_012965824.1_1287	0.346861	0.699714	0.375251
lcl|NC_013849.1_cds_WP_012965825.1_1288	0.332584	0.686723	0.357542
lcl|NC_013849.1_cds_WP_012965826.1_1289	0.32353	0.67857	0.347623
lcl|NC_013849.1_cds_WP_012965827.1_1290	0.341257	0.672592	0.364838
lcl|NC_013849.1_cds_WP_012965828.1_1291	0.335125	0.717045	0.359291
lcl|NC_013849.1_cds_WP_012965830.1_1292	0.31794	0.608481	0.338478
lcl|NC_013849.1_cds_WP_012965832.1_1294	0.339467	0.694022	0.366282
lcl|NC_013849.1_cds_WP_012965833.1_1295	0.345958	0.66142	0.370893
lcl|NC_013849.1_cds_WP_012965834.1_1296	0.338567	0.634685	0.354572
lcl|NC_013849.1_cds_WP_012965835.1_1297	0.359695	0.661595	0.38101
lcl|NC_013849.1_cds_WP_012965836.1_1298	0.36262	0.704926	0.389227
lcl|NC_013849.1_cds_WP_012965837.1_1299	0.352803	0.682094	0.379391
lcl|NC_013849.1_cds_WP_012965838.1_1300	0.331063	0.612472	0.354097
lcl|NC_013849.1_cds_WP_012965839.1_1301	0.336122	0.625686	0.35775
lcl|NC_013849.1_cds_WP_012965840.1_1302	0.327361	0.67315	0.350396
lcl|NC_013849.1_cds_WP_012965841.1_1303	0.333315	0.625638	0.353639
lcl|NC_013849.1_cds_WP_012965842.1_1304	0.341888	0.658813	0.367889
lcl|NC_013849.1_cds_WP_012965843.1_1305	0.341557	0.737415	0.364286
lcl|NC_013849.1_cds_WP_012965844.1_1306	0.355645	0.689541	0.384214
lcl|NC_013849.1_cds_WP_012965845.1_1307	0.346087	0.679814	0.377383
lcl|NC_013849.1_cds_WP_012965846.1_1308	0.34143	0.667954	0.37297
lcl|NC_013849.1_cds_WP_012965847.1_1309	0.396882	0.651001	0.436964
lcl|NC_013849.1_cds_WP_012965848.1_1310	0.338487	0.688507	0.36833
lcl|NC_013849.1_cds_WP_012965849.1_1311	0.335586	0.690638	0.35974
lcl|NC_013849.1_cds_WP_012965850.1_1312	0.324118	0.613328	0.34309
lcl|NC_013849.1_cds_WP_012965852.1_1314	0.331556	0.683379	0.351577
lcl|NC_013849.1_cds_WP_012965854.1_1316	0.33002	0.683776	0.352802
lcl|NC_013849.1_cds_WP_012965855.1_1317	0.340874	0.670187	0.363853
lcl|NC_013849.1_cds_WP_012965856.1_1318	0.334502	0.678893	0.35989
lcl|NC_013849.1_cds_WP_012965857.1_1319	0.340777	0.63056	0.361728
lcl|NC_013849.1_cds_WP_012965858.1_1320	0.319324	0.621112	0.337723
lcl|NC_013849.1_cds_WP_012965859.1_1321	0.350686	0.638447	0.371857
lcl|NC_013849.1_cds_WP_012965860.1_1322	0.325875	0.700712	0.348465
lcl|NC_013849.1_cds_WP_012965861.1_1323	0.3434	0.692051	0.367111
lcl|NC_013849.1_cds_WP_012965862.1_1324	0.32962	0.675897	0.353701
lcl|NC_013849.1_cds_WP_012965863.1_1325	0.307271	0.582862	0.321082
lcl|NC_013849.1_cds_WP_012965864.1_1326	0.325119	0.584044	0.340351
lcl|NC_013849.1_cds_WP_012965865.1_1327	0.355182	0.64178	0.376053
lcl|NC_013849.1_cds_WP_012965866.1_1328	0.332446	0.694366	0.354063
lcl|NC_013849.1_cds_WP_012965868.1_1330	0.333032	0.649201	0.357044
lcl|NC_013849.1_cds_WP_012965869.1_1331	0.323322	0.667294	0.346677
lcl|NC_013849.1_cds_WP_012965870.1_1332	0.381197	0.719298	0.408358
lcl|NC_013849.1_cds_WP_012965871.1_1333	0.33	0.694499	0.350655
lcl|NC_013849.1_cds_WP_012965873.1_1334	0.342964	0.66505	0.366455
lcl|NC_013849.1_cds_WP_012965874.1_1335	0.33912	0.692833	0.368582
lcl|NC_013849.1_cds_WP_012965875.1_1336	0.311468	0.668672	0.3297
lcl|NC_013849.1_cds_WP_012965876.1_1337	0.345814	0.701694	0.371434
lcl|NC_013849.1_cds_WP_012965877.1_1338	0.401858	0.715154	0.44396
lcl|NC_013849.1_cds_WP_012965878.1_1339	0.322449	0.67275	0.347448
lcl|NC_013849.1_cds_WP_012965879.1_1340	0.338301	0.683374	0.353133
lcl|NC_013849.1_cds_WP_012965880.1_1341	0.34563	0.700418	0.373278
lcl|NC_013849.1_cds_WP_012965881.1_1342	0.344353	0.69347	0.370558
lcl|NC_013849.1_cds_WP_012965882.1_1343	0.316827	0.659579	0.337081
lcl|NC_013849.1_cds_WP_012965883.1_1344	0.340633	0.718746	0.369711
lcl|NC_013849.1_cds_WP_012965885.1_1346	0.32807	0.630117	0.35122
lcl|NC_013849.1_cds_WP_012965886.1_1347	0.35678	0.624143	0.37742
lcl|NC_013849.1_cds_WP_012965887.1_1348	0.344478	0.718079	0.36829
lcl|NC_013849.1_cds_WP_012965889.1_1350	0.338268	0.706623	0.36405
lcl|NC_013849.1_cds_WP_012965890.1_1351	0.344353	0.642347	0.367014
lcl|NC_013849.1_cds_WP_012965892.1_1353	0.34892	0.719665	0.376155
lcl|NC_013849.1_cds_WP_012965895.1_1355	0.352489	0.666251	0.378506
lcl|NC_013849.1_cds_WP_012965896.1_1356	0.342744	0.650354	0.383346
lcl|NC_013849.1_cds_WP_012965898.1_1358	0.366223	0.695665	0.404562
lcl|NC_013849.1_cds_WP_012965899.1_1359	0.326622	0.733591	0.351403
lcl|NC_013849.1_cds_WP_012965900.1_1360	0.353375	0.692126	0.386675
lcl|NC_013849.1_cds_WP_012965901.1_1361	0.34065	0.606687	0.357969
lcl|NC_013849.1_cds_WP_012965902.1_1362	0.331173	0.658445	0.353782
lcl|NC_013849.1_cds_WP_012965903.1_1363	0.312949	0.5838	0.325742
lcl|NC_013849.1_cds_WP_012965904.1_1364	0.35306	0.684176	0.381067
lcl|NC_013849.1_cds_WP_012965905.1_1365	0.343051	0.687121	0.366536
lcl|NC_013849.1_cds_WP_012965906.1_1366	0.353161	0.638532	0.381455
lcl|NC_013849.1_cds_WP_012965907.1_1367	0.347305	0.726399	0.374957
lcl|NC_013849.1_cds_WP_012965908.1_1368	0.36394	0.674381	0.400698
lcl|NC_013849.1_cds_WP_012965909.1_1369	0.394531	0.759962	0.43599
lcl|NC_013849.1_cds_WP_012965910.1_1370	0.315339	0.663717	0.333088
lcl|NC_013849.1_cds_WP_012965911.1_1371	0.361353	0.692505	0.388373
lcl|NC_013849.1_cds_WP_012965912.1_1372	0.359872	0.711572	0.385287
lcl|NC_013849.1_cds_WP_012965913.1_1373	0.340553	0.712967	0.363857
lcl|NC_013849.1_cds_WP_012965914.1_1374	0.35241	0.733748	0.381214
lcl|NC_013849.1_cds_WP_012965915.1_1375	0.34783	0.684583	0.370989
lcl|NC_013849.1_cds_WP_012965916.1_1376	0.346669	0.708797	0.374457
lcl|NC_013849.1_cds_WP_012965917.1_1377	0.326962	0.718564	0.348761
lcl|NC_013849.1_cds_WP_012965919.1_1379	0.307637	0.627759	0.321897
lcl|NC_013849.1_cds_WP_012965920.1_1380	0.327644	0.634827	0.35481
lcl|NC_013849.1_cds_WP_012965922.1_1382	0.342863	0.728001	0.369474
lcl|NC_013849.1_cds_WP_012965923.1_1383	0.344999	0.691437	0.376268
lcl|NC_013849.1_cds_WP_012965924.1_1384	0.344761	0.656204	0.3755
lcl|NC_013849.1_cds_WP_012965925.1_1385	0.338673	0.675562	0.362712
lcl|NC_013849.1_cds_WP_012965926.1_1386	0.335803	0.61519	0.36041
lcl|NC_013849.1_cds_WP_012965927.1_1387	0.329099	0.705632	0.359562
lcl|NC_013849.1_cds_WP_012965929.1_1389	0.334604	0.703189	0.358557
lcl|NC_013849.1_cds_WP_012965930.1_1390	0.328553	0.626781	0.361415
lcl|NC_013849.1_cds_WP_012965931.1_1391	0.351382	0.636073	0.369695
lcl|NC_013849.1_cds_WP_012965932.1_1392	0.33749	0.691811	0.362729
lcl|NC_013849.1_cds_WP_012965933.1_1393	0.348245	0.684587	0.37592
lcl|NC_013849.1_cds_WP_012965934.1_1394	0.347229	0.725573	0.374182
lcl|NC_013849.1_cds_WP_012965935.1_1395	0.349458	0.70491	0.375254
lcl|NC_013849.1_cds_WP_012965936.1_1396	0.353253	0.689545	0.379989
lcl|NC_013849.1_cds_WP_012965937.1_1397	0.339089	0.745043	0.3561
lcl|NC_013849.1_cds_WP_012965938.1_1398	0.33517	0.673232	0.356326
lcl|NC_013849.1_cds_WP_012965940.1_1400	0.330713	0.681151	0.355642
lcl|NC_013849.1_cds_WP_012965941.1_1401	0.335506	0.691665	0.363688
lcl|NC_013849.1_cds_WP_012965942.1_1402	0.34032	0.672362	0.364041
lcl|NC_013849.1_cds_WP_012965943.1_1403	0.339919	0.67015	0.362995
lcl|NC_013849.1_cds_WP_012965945.1_1405	0.317033	0.621361	0.332079
lcl|NC_013849.1_cds_WP_012965946.1_1406	0.355959	0.712515	0.38812
lcl|NC_013849.1_cds_WP_012965947.1_1407	0.356593	0.719476	0.398268
lcl|NC_013849.1_cds_WP_012965948.1_1408	0.337825	0.614782	0.364964
lcl|NC_013849.1_cds_WP_012965949.1_1409	0.357922	0.637948	0.388145
lcl|NC_013849.1_cds_WP_012965951.1_1411	0.383262	0.723056	0.430278
lcl|NC_013849.1_cds_WP_012965952.1_1412	0.375233	0.717371	0.412471
lcl|NC_013849.1_cds_WP_012965953.1_1413	0.336622	0.633411	0.360328
lcl|NC_013849.1_cds_WP_012965954.1_1414	0.314795	0.602758	0.339705
lcl|NC_013849.1_cds_WP_012965955.1_1415	0.344362	0.623026	0.370922
lcl|NC_013849.1_cds_WP_012965956.1_1416	0.357725	0.717328	0.389492
lcl|NC_013849.1_cds_WP_012965957.1_1417	0.355887	0.640712	0.383452
lcl|NC_013849.1_cds_WP_012965958.1_1418	0.344793	0.633856	0.366808
lcl|NC_013849.1_cds_WP_012965959.1_1419	0.339649	0.622962	0.364672
lcl|NC_013849.1_cds_WP_012965960.1_1420	0.349225	0.691206	0.380919
lcl|NC_013849.1_cds_WP_012965961.1_1421	0.339373	0.690454	0.364607
lcl|NC_013849.1_cds_WP_012965962.1_1422	0.377502	0.745261	0.411134
lcl|NC_013849.1_cds_WP_012965966.1_1426	0.366497	0.732522	0.39396
lcl|NC_013849.1_cds_WP_012965967.1_1427	0.357049	0.760975	0.384771
lcl|NC_013849.1_cds_WP_012965969.1_1428	0.341245	0.667767	0.364741
lcl|NC_013849.1_cds_WP_012965970.1_1429	0.345493	0.724068	0.370213
lcl|NC_013849.1_cds_WP_012965971.1_1430	0.347616	0.679711	0.376358
lcl|NC_013849.1_cds_WP_012965974.1_1432	0.35068	0.71022	0.379807
lcl|NC_013849.1_cds_WP_012965975.1_1433	0.340949	0.712833	0.366715
lcl|NC_013849.1_cds_WP_012965976.1_1434	0.353886	0.714092	0.384204
lcl|NC_013849.1_cds_WP_012965977.1_1435	0.344122	0.729181	0.366925
lcl|NC_013849.1_cds_WP_012965979.1_1437	0.34678	0.65664	0.362857
lcl|NC_013849.1_cds_WP_012965980.1_1438	0.357664	0.650787	0.393758
lcl|NC_013849.1_cds_WP_012965981.1_1439	0.328827	0.652959	0.351015
lcl|NC_013849.1_cds_WP_012965982.1_1440	0.357771	0.723775	0.386311
lcl|NC_013849.1_cds_WP_012965983.1_1441	0.345185	0.730209	0.374151
lcl|NC_013849.1_cds_WP_012965984.1_1442	0.341714	0.706789	0.371611
lcl|NC_013849.1_cds_WP_012965986.1_1444	0.336536	0.633008	0.35547
lcl|NC_013849.1_cds_WP_012965987.1_1445	0.347875	0.6912	0.376707
lcl|NC_013849.1_cds_WP_012965988.1_1448	0.364537	0.711074	0.392346
lcl|NC_013849.1_cds_WP_012965989.1_1449	0.337403	0.665269	0.358941
lcl|NC_013849.1_cds_WP_012965990.1_1450	0.338434	0.630087	0.358727
lcl|NC_013849.1_cds_WP_012965991.1_1451	0.33868	0.668657	0.367313
lcl|NC_013849.1_cds_WP_012965992.1_1452	0.34674	0.688316	0.377508
lcl|NC_013849.1_cds_WP_012965993.1_1453	0.361038	0.74292	0.390711
lcl|NC_013849.1_cds_WP_012965994.1_1454	0.353777	0.738661	0.381234
lcl|NC_013849.1_cds_WP_012965995.1_1455	0.337194	0.684236	0.362436
lcl|NC_013849.1_cds_WP_012965996.1_1456	0.346927	0.744348	0.37772
lcl|NC_013849.1_cds_WP_012965997.1_1457	0.336559	0.727852	0.361099
lcl|NC_013849.1_cds_WP_012965998.1_1458	0.351814	0.700366	0.380391
lcl|NC_013849.1_cds_WP_012965999.1_1459	0.344634	0.698144	0.376585
lcl|NC_013849.1_cds_WP_012966000.1_1460	0.327947	0.712877	0.360221
lcl|NC_013849.1_cds_WP_012966001.1_1461	0.343959	0.694368	0.369492
lcl|NC_013849.1_cds_WP_012966002.1_1462	0.336744	0.745294	0.359595
lcl|NC_013849.1_cds_WP_012966003.1_1463	0.338209	0.681363	0.365511
lcl|NC_013849.1_cds_WP_012966004.1_1464	0.327602	0.675113	0.348253
lcl|NC_013849.1_cds_WP_012966005.1_1465	0.340587	0.673806	0.369813
lcl|NC_013849.1_cds_WP_012966007.1_1467	0.363724	0.702078	0.395725
lcl|NC_013849.1_cds_WP_012966008.1_1469	0.345339	0.687485	0.372007
lcl|NC_013849.1_cds_WP_012966009.1_1470	0.340546	0.695919	0.368618
lcl|NC_013849.1_cds_WP_012966010.1_1471	0.322239	0.7116	0.34505
lcl|NC_013849.1_cds_WP_012966011.1_1472	0.336183	0.713899	0.368121
lcl|NC_013849.1_cds_WP_012966012.1_1473	0.346356	0.713033	0.376151
lcl|NC_013849.1_cds_WP_012966013.1_1474	0.358848	0.719657	0.394013
lcl|NC_013849.1_cds_WP_012966014.1_1475	0.35109	0.715557	0.381578
lcl|NC_013849.1_cds_WP_012966015.1_1476	0.359341	0.707915	0.390165
lcl|NC_013849.1_cds_WP_012966016.1_1477	0.355405	0.687996	0.388299
lcl|NC_013849.1_cds_WP_012966017.1_1478	0.350913	0.736579	0.380795
lcl|NC_013849.1_cds_WP_012966018.1_1479	0.335019	0.701623	0.356782
lcl|NC_013849.1_cds_WP_012966019.1_1480	0.338845	0.683938	0.361807
lcl|NC_013849.1_cds_WP_012966020.1_1481	0.324998	0.6227	0.34347
lcl|NC_013849.1_cds_WP_012966021.1_1484	0.325733	0.567164	0.348325
lcl|NC_013849.1_cds_WP_012966022.1_1485	0.350461	0.688923	0.376389
lcl|NC_013849.1_cds_WP_012966023.1_1486	0.354604	0.703781	0.381109
lcl|NC_013849.1_cds_WP_012966024.1_1487	0.348525	0.688924	0.374254
lcl|NC_013849.1_cds_WP_012966025.1_1488	0.344165	0.654417	0.368682
lcl|NC_013849.1_cds_WP_012966026.1_1489	0.322229	0.656131	0.340668
lcl|NC_013849.1_cds_WP_012966027.1_1490	0.344558	0.660257	0.375677
lcl|NC_013849.1_cds_WP_012966028.1_1491	0.319291	0.640171	0.342562
lcl|NC_013849.1_cds_WP_012966029.1_1492	0.305341	0.595238	0.323685
lcl|NC_013849.1_cds_WP_012966030.1_1493	0.303412	0.597246	0.319968
lcl|NC_013849.1_cds_WP_012966031.1_1494	0.357371	0.714938	0.385332
lcl|NC_013849.1_cds_WP_012966032.1_1495	0.344988	0.682401	0.36765
lcl|NC_013849.1_cds_WP_012966033.1_1496	0.334202	0.696988	0.354968
lcl|NC_013849.1_cds_WP_012966034.1_1497	0.328605	0.696716	0.355022
lcl|NC_013849.1_cds_WP_012966035.1_1498	0.312647	0.787192	0.338537
lcl|NC_013849.1_cds_WP_012966036.1_1499	0.345336	0.671828	0.374738
lcl|NC_013849.1_cds_WP_012966037.1_1500	0.368845	0.770567	0.399968
lcl|NC_013849.1_cds_WP_012966038.1_1501	0.342053	0.72486	0.36938
lcl|NC_013849.1_cds_WP_012966039.1_1502	0.344789	0.642856	0.365089
lcl|NC_013849.1_cds_WP_012966040.1_1503	0.334623	0.683885	0.359536
lcl|NC_013849.1_cds_WP_012966041.1_1504	0.358242	0.701763	0.391638
lcl|NC_013849.1_cds_WP_012966042.1_1505	0.347151	0.709621	0.372194
lcl|NC_013849.1_cds_WP_012966043.1_1506	0.339773	0.603757	0.356753
lcl|NC_013849.1_cds_WP_012966044.1_1507	0.323303	0.66183	0.346319
lcl|NC_013849.1_cds_WP_012966045.1_1508	0.319468	0.624932	0.342144
lcl|NC_013849.1_cds_WP_012966047.1_1510	0.366702	0.628411	0.400254
lcl|NC_013849.1_cds_WP_012966049.1_1512	0.339081	0.614479	0.367426
lcl|NC_013849.1_cds_WP_012966050.1_1513	0.314644	0.647848	0.335602
lcl|NC_013849.1_cds_WP_012966051.1_1514	0.361965	0.6832	0.387763
lcl|NC_013849.1_cds_WP_012966052.1_1515	0.324083	0.615465	0.350504
lcl|NC_013849.1_cds_WP_012966053.1_1516	0.338062	0.63472	0.370597
lcl|NC_013849.1_cds_WP_012966054.1_1520	0.32488	0.680003	0.345867
lcl|NC_013849.1_cds_WP_012966055.1_1522	0.338623	0.682309	0.360563
lcl|NC_013849.1_cds_WP_012966056.1_1523	0.34474	0.682577	0.369532
lcl|NC_013849.1_cds_WP_012966058.1_1525	0.346269	0.691967	0.372077
lcl|NC_013849.1_cds_WP_012966059.1_1526	0.316629	0.626845	0.336754
lcl|NC_013849.1_cds_WP_012966060.1_1527	0.335645	0.699559	0.357944
lcl|NC_013849.1_cds_WP_012966061.1_1528	0.342595	0.641701	0.367787
lcl|NC_013849.1_cds_WP_012966062.1_1529	0.34632	0.664844	0.370526
lcl|NC_013849.1_cds_WP_012966063.1_1530	0.343647	0.650767	0.372977
lcl|NC_013849.1_cds_WP_012966064.1_1531	0.312919	0.589855	0.330207
lcl|NC_013849.1_cds_WP_012966066.1_1533	0.314797	0.570089	0.329387
lcl|NC_013849.1_cds_WP_012966067.1_1534	0.328294	0.544756	0.347396
lcl|NC_013849.1_cds_WP_012966068.1_1535	0.337824	0.700377	0.36345
lcl|NC_013849.1_cds_WP_012966069.1_1536	0.353009	0.745159	0.383535
lcl|NC_013849.1_cds_WP_012966070.1_1537	0.332048	0.714929	0.35847
lcl|NC_013849.1_cds_WP_012966071.1_1538	0.33453	0.663431	0.362225
lcl|NC_013849.1_cds_WP_012966072.1_1539	0.351415	0.726427	0.386823
lcl|NC_013849.1_cds_WP_012966073.1_1540	0.347204	0.697959	0.376093
lcl|NC_013849.1_cds_WP_012966074.1_1541	0.308491	0.589526	0.320404
lcl|NC_013849.1_cds_WP_012966075.1_1542	0.289849	0.598758	0.299537
lcl|NC_013849.1_cds_WP_012966076.1_1543	0.312359	0.571049	0.329263
lcl|NC_013849.1_cds_WP_012966077.1_1544	0.340652	0.718452	0.366536
lcl|NC_013849.1_cds_WP_012966078.1_1545	0.358611	0.747847	0.392032
lcl|NC_013849.1_cds_WP_012966079.1_1546	0.342248	0.741111	0.371686
lcl|NC_013849.1_cds_WP_012966080.1_1547	0.358115	0.67706	0.384805
lcl|NC_013849.1_cds_WP_012966081.1_1548	0.358924	0.727726	0.388569
lcl|NC_013849.1_cds_WP_012966082.1_1549	0.347599	0.720637	0.372826
lcl|NC_013849.1_cds_WP_012966083.1_1550	0.349368	0.727755	0.375829
lcl|NC_013849.1_cds_WP_012966084.1_1551	0.334107	0.7115	0.354785
lcl|NC_013849.1_cds_WP_012966085.1_1552	0.349772	0.65532	0.371482
lcl|NC_013849.1_cds_WP_012966086.1_1553	0.313845	0.590438	0.331175
lcl|NC_013849.1_cds_WP_012966087.1_1554	0.36725	0.716779	0.399812
lcl|NC_013849.1_cds_WP_012966088.1_1555	0.364112	0.688259	0.406526
lcl|NC_013849.1_cds_WP_012966089.1_1556	0.350293	0.652541	0.383252
lcl|NC_013849.1_cds_WP_012966093.1_1559	0.325319	0.656578	0.349655
lcl|NC_013849.1_cds_WP_012966094.1_1560	0.34066	0.635498	0.360943
lcl|NC_013849.1_cds_WP_012966095.1_1561	0.333554	0.639375	0.354044
lcl|NC_013849.1_cds_WP_012966096.1_1562	0.334818	0.684813	0.353784
lcl|NC_013849.1_cds_WP_012966097.1_1563	0.350498	0.697805	0.376962
lcl|NC_013849.1_cds_WP_012966098.1_1564	0.366454	0.7378	0.395671
lcl|NC_013849.1_cds_WP_012966099.1_1565	0.333217	0.693648	0.354058
lcl|NC_013849.1_cds_WP_012966101.1_1566	0.3251	0.661742	0.347594
lcl|NC_013849.1_cds_WP_012966102.1_1567	0.337047	0.704168	0.359619
lcl|NC_013849.1_cds_WP_012966103.1_1568	0.357065	0.712315	0.38433
lcl|NC_013849.1_cds_WP_012966104.1_1569	0.339651	0.702415	0.363022
lcl|NC_013849.1_cds_WP_012966105.1_1570	0.351206	0.697551	0.381072
lcl|NC_013849.1_cds_WP_012966106.1_1571	0.34214	0.684245	0.368406
lcl|NC_013849.1_cds_WP_012966107.1_1572	0.35309	0.674755	0.3864
lcl|NC_013849.1_cds_WP_012966109.1_1574	0.361838	0.664189	0.388258
lcl|NC_013849.1_cds_WP_012966110.1_1575	0.307249	0.63717	0.335741
lcl|NC_013849.1_cds_WP_012966112.1_1578	0.352871	0.718754	0.379631
lcl|NC_013849.1_cds_WP_012966113.1_1579	0.326359	0.636357	0.34984
lcl|NC_013849.1_cds_WP_012966114.1_1580	0.341178	0.679231	0.368619
lcl|NC_013849.1_cds_WP_012966116.1_1581	0.330962	0.670743	0.357994
lcl|NC_013849.1_cds_WP_012966117.1_1582	0.316209	0.663834	0.337266
lcl|NC_013849.1_cds_WP_012966118.1_1583	0.345237	0.704128	0.371009
lcl|NC_013849.1_cds_WP_012966119.1_1584	0.34715	0.680128	0.378635
lcl|NC_013849.1_cds_WP_012966120.1_1585	0.359968	0.700088	0.393862
lcl|NC_013849.1_cds_WP_012966121.1_1586	0.347881	0.721053	0.37247
lcl|NC_013849.1_cds_WP_012966122.1_1587	0.330514	0.594922	0.345361
lcl|NC_013849.1_cds_WP_012966123.1_1588	0.345066	0.673013	0.373099
lcl|NC_013849.1_cds_WP_012966124.1_1589	0.34492	0.63481	0.363773
lcl|NC_013849.1_cds_WP_012966126.1_1591	0.342301	0.722625	0.373529
lcl|NC_013849.1_cds_WP_012966127.1_1592	0.348105	0.727295	0.377721
lcl|NC_013849.1_cds_WP_012966128.1_1593	0.351805	0.676758	0.374321
lcl|NC_013849.1_cds_WP_012966129.1_1594	0.333402	0.714724	0.362031
lcl|NC_013849.1_cds_WP_012966130.1_1595	0.338006	0.691231	0.359916
lcl|NC_013849.1_cds_WP_012966132.1_1597	0.315546	0.554622	0.333985
lcl|NC_013849.1_cds_WP_012966133.1_1600	0.3499	0.722273	0.373903
lcl|NC_013849.1_cds_WP_012966134.1_1601	0.337718	0.702379	0.363669
lcl|NC_013849.1_cds_WP_012966135.1_1602	0.34702	0.622986	0.368218
lcl|NC_013849.1_cds_WP_012966137.1_1604	0.321097	0.629474	0.340431
lcl|NC_013849.1_cds_WP_012966138.1_1605	0.346435	0.641425	0.367758
lcl|NC_013849.1_cds_WP_012966139.1_1606	0.322874	0.676231	0.345061
lcl|NC_013849.1_cds_WP_012966140.1_1607	0.329524	0.605639	0.349803
lcl|NC_013849.1_cds_WP_012966142.1_1609	0.322661	0.623171	0.337672
lcl|NC_013849.1_cds_WP_012966143.1_1610	0.309672	0.597037	0.323879
lcl|NC_013849.1_cds_WP_012966144.1_1613	0.342391	0.689203	0.364515
lcl|NC_013849.1_cds_WP_012966145.1_1614	0.361187	0.679802	0.390675
lcl|NC_013849.1_cds_WP_012966146.1_1615	0.328273	0.716563	0.349749
lcl|NC_013849.1_cds_WP_012966147.1_1616	0.331168	0.700757	0.351044
lcl|NC_013849.1_cds_WP_012966148.1_1617	0.338538	0.675306	0.363231
lcl|NC_013849.1_cds_WP_012966149.1_1618	0.361804	0.637891	0.396203
lcl|NC_013849.1_cds_WP_012966150.1_1619	0.355921	0.717173	0.377689
lcl|NC_013849.1_cds_WP_012966151.1_1620	0.33215	0.690296	0.353857
lcl|NC_013849.1_cds_WP_012966153.1_1622	0.337537	0.686289	0.358837
lcl|NC_013849.1_cds_WP_012966154.1_1623	0.36525	0.729389	0.394798
lcl|NC_013849.1_cds_WP_012966156.1_1625	0.331866	0.728206	0.35587
lcl|NC_013849.1_cds_WP_012966159.1_1628	0.307423	0.590256	0.324804
lcl|NC_013849.1_cds_WP_012966162.1_1630	0.355978	0.694845	0.391772
lcl|NC_013849.1_cds_WP_012966163.1_1631	0.340337	0.670799	0.366736
lcl|NC_013849.1_cds_WP_012966164.1_1632	0.348783	0.681333	0.375534
lcl|NC_013849.1_cds_WP_012966165.1_1633	0.361423	0.706201	0.387605
lcl|NC_013849.1_cds_WP_012966166.1_1634	0.368004	0.719415	0.397717
lcl|NC_013849.1_cds_WP_012966168.1_1636	0.339905	0.66203	0.356717
lcl|NC_013849.1_cds_WP_012966169.1_1637	0.352354	0.71325	0.379253
lcl|NC_013849.1_cds_WP_012966170.1_1638	0.346712	0.699222	0.373583
lcl|NC_013849.1_cds_WP_012966171.1_1639	0.337015	0.712852	0.367594
lcl|NC_013849.1_cds_WP_012966173.1_1641	0.341744	0.718386	0.374997
lcl|NC_013849.1_cds_WP_012966174.1_1642	0.349001	0.705364	0.37947
lcl|NC_013849.1_cds_WP_012966175.1_1643	0.380852	0.702569	0.412536
lcl|NC_013849.1_cds_WP_012966176.1_1645	0.340494	0.706208	0.375553
lcl|NC_013849.1_cds_WP_012966177.1_1646	0.351725	0.65052	0.379494
lcl|NC_013849.1_cds_WP_012966179.1_1648	0.348691	0.63691	0.372098
lcl|NC_013849.1_cds_WP_012966180.1_1650	0.329241	0.683062	0.345208
lcl|NC_013849.1_cds_WP_012966181.1_1651	0.333605	0.558539	0.349411
lcl|NC_013849.1_cds_WP_012966182.1_1652	0.32974	0.648193	0.355386
lcl|NC_013849.1_cds_WP_012966183.1_1653	0.312041	0.60627	0.328177
lcl|NC_013849.1_cds_WP_012966185.1_1655	0.322281	0.646756	0.342329
lcl|NC_013849.1_cds_WP_012966186.1_1656	0.327543	0.637801	0.344563
lcl|NC_013849.1_cds_WP_012966187.1_1657	0.346783	0.625804	0.37133
lcl|NC_013849.1_cds_WP_012966188.1_1658	0.355342	0.663849	0.376992
lcl|NC_013849.1_cds_WP_012966189.1_1659	0.357285	0.681681	0.378183
lcl|NC_013849.1_cds_WP_012966190.1_1660	0.341042	0.6499	0.363903
lcl|NC_013849.1_cds_WP_012966191.1_1661	0.355611	0.605715	0.377732
lcl|NC_013849.1_cds_WP_012966193.1_1663	0.345648	0.690669	0.369757
lcl|NC_013849.1_cds_WP_012966195.1_1665	0.331564	0.735361	0.356782
lcl|NC_013849.1_cds_WP_012966196.1_1666	0.341106	0.681197	0.364279
lcl|NC_013849.1_cds_WP_012966197.1_1667	0.334669	0.69683	0.356531
lcl|NC_013849.1_cds_WP_012966198.1_1668	0.342765	0.663592	0.366067
lcl|NC_013849.1_cds_WP_012966199.1_1669	0.33037	0.676793	0.350114
lcl|NC_013849.1_cds_WP_012966200.1_1670	0.326592	0.620785	0.349916
lcl|NC_013849.1_cds_WP_012966202.1_1672	0.331985	0.713211	0.358532
lcl|NC_013849.1_cds_WP_012966203.1_1673	0.351364	0.741776	0.376424
lcl|NC_013849.1_cds_WP_012966204.1_1674	0.329565	0.706696	0.349955
lcl|NC_013849.1_cds_WP_012966205.1_1675	0.326411	0.702509	0.347788
lcl|NC_013849.1_cds_WP_012966206.1_1676	0.356373	0.741728	0.386968
lcl|NC_013849.1_cds_WP_012966207.1_1677	0.328879	0.723303	0.351731
lcl|NC_013849.1_cds_WP_012966208.1_1678	0.333592	0.689265	0.361374
lcl|NC_013849.1_cds_WP_012966209.1_1679	0.340512	0.673724	0.364215
lcl|NC_013849.1_cds_WP_012966210.1_1680	0.33665	0.710876	0.360077
lcl|NC_013849.1_cds_WP_012966211.1_1681	0.376296	0.718977	0.421396
lcl|NC_013849.1_cds_WP_012966212.1_1682	0.342751	0.676145	0.365151
lcl|NC_013849.1_cds_WP_012966213.1_1683	0.336514	0.731649	0.361409
lcl|NC_013849.1_cds_WP_012966214.1_1684	0.340518	0.6369	0.365448
lcl|NC_013849.1_cds_WP_012966215.1_1685	0.341946	0.682927	0.363912
lcl|NC_013849.1_cds_WP_012966216.1_1686	0.337823	0.671335	0.363194
lcl|NC_013849.1_cds_WP_012966217.1_1687	0.331919	0.701878	0.356869
lcl|NC_013849.1_cds_WP_012966218.1_1688	0.334423	0.712476	0.365729
lcl|NC_013849.1_cds_WP_012966219.1_1689	0.332255	0.700029	0.358388
lcl|NC_013849.1_cds_WP_012966221.1_1691	0.356827	0.691282	0.386172
lcl|NC_013849.1_cds_WP_012966222.1_1692	0.355116	0.686812	0.382248
lcl|NC_013849.1_cds_WP_012966223.1_1693	0.348546	0.693034	0.376536
lcl|NC_013849.1_cds_WP_012966224.1_1694	0.33538	0.664542	0.362842
lcl|NC_013849.1_cds_WP_012966225.1_1695	0.356966	0.713362	0.38696
lcl|NC_013849.1_cds_WP_012966226.1_1696	0.356572	0.727227	0.390637
lcl|NC_013849.1_cds_WP_012966227.1_1697	0.347305	0.718651	0.377714
lcl|NC_013849.1_cds_WP_012966228.1_1698	0.335875	0.696771	0.359923
lcl|NC_013849.1_cds_WP_012966229.1_1699	0.341946	0.702582	0.364548
lcl|NC_013849.1_cds_WP_012966230.1_1700	0.349083	0.711904	0.375688
lcl|NC_013849.1_cds_WP_012966231.1_1701	0.323051	0.690044	0.34588
lcl|NC_013849.1_cds_WP_012966232.1_1702	0.344355	0.653798	0.374672
lcl|NC_013849.1_cds_WP_012966233.1_1703	0.329745	0.664269	0.354405
lcl|NC_013849.1_cds_WP_012966234.1_1704	0.32548	0.600865	0.340006
lcl|NC_013849.1_cds_WP_012966235.1_1705	0.343155	0.639862	0.368575
lcl|NC_013849.1_cds_WP_012966237.1_1707	0.331187	0.670626	0.351408
lcl|NC_013849.1_cds_WP_012966238.1_1708	0.30516	0.65087	0.320778
lcl|NC_013849.1_cds_WP_012966239.1_1709	0.326074	0.670925	0.341242
lcl|NC_013849.1_cds_WP_012966241.1_1711	0.319737	0.647936	0.342446
lcl|NC_013849.1_cds_WP_012966242.1_1712	0.329582	0.670557	0.350053
lcl|NC_013849.1_cds_WP_012966243.1_1714	0.327784	0.669337	0.35464
lcl|NC_013849.1_cds_WP_012966244.1_1715	0.351632	0.689764	0.379884
lcl|NC_013849.1_cds_WP_012966245.1_1716	0.34358	0.702817	0.36973
lcl|NC_013849.1_cds_WP_012966246.1_1717	0.343483	0.76505	0.370353
lcl|NC_013849.1_cds_WP_012966247.1_1718	0.333696	0.669252	0.358528
lcl|NC_013849.1_cds_WP_012966249.1_1720	0.377336	0.697696	0.419941
lcl|NC_013849.1_cds_WP_012966250.1_1721	0.329928	0.689916	0.353904
lcl|NC_013849.1_cds_WP_012966252.1_1723	0.34694	0.711845	0.374317
lcl|NC_013849.1_cds_WP_012966253.1_1724	0.337017	0.701109	0.365411
lcl|NC_013849.1_cds_WP_012966254.1_1725	0.331709	0.715191	0.357892
lcl|NC_013849.1_cds_WP_012966256.1_1727	0.336034	0.703236	0.358656
lcl|NC_013849.1_cds_WP_012966257.1_1728	0.372283	0.664886	0.408456
lcl|NC_013849.1_cds_WP_012966258.1_1729	0.337718	0.639221	0.361867
lcl|NC_013849.1_cds_WP_012966259.1_1730	0.329239	0.654001	0.346325
lcl|NC_013849.1_cds_WP_012966260.1_1731	0.33575	0.632948	0.35911
lcl|NC_013849.1_cds_WP_012966261.1_1732	0.343996	0.64387	0.370215
lcl|NC_013849.1_cds_WP_012966262.1_1733	0.339804	0.654706	0.372769
lcl|NC_013849.1_cds_WP_012966263.1_1734	0.353488	0.727394	0.383507
lcl|NC_013849.1_cds_WP_012966264.1_1735	0.342501	0.712227	0.369722
lcl|NC_013849.1_cds_WP_012966265.1_1736	0.332818	0.67409	0.355565
lcl|NC_013849.1_cds_WP_012966266.1_1737	0.379647	0.756121	0.408934
lcl|NC_013849.1_cds_WP_012966267.1_1738	0.361799	0.752708	0.392431
lcl|NC_013849.1_cds_WP_012966268.1_1739	0.356373	0.638562	0.387202
lcl|NC_013849.1_cds_WP_012966269.1_1740	0.31638	0.629772	0.344759
lcl|NC_013849.1_cds_WP_012966270.1_1741	0.365594	0.737631	0.401109
lcl|NC_013849.1_cds_WP_012966271.1_1742	0.357696	0.758691	0.391172
lcl|NC_013849.1_cds_WP_012966272.1_1743	0.338633	0.690089	0.368251
lcl|NC_013849.1_cds_WP_012966273.1_1744	0.325567	0.645478	0.346213
lcl|NC_013849.1_cds_WP_012966274.1_1745	0.359929	0.715099	0.39191
lcl|NC_013849.1_cds_WP_012966275.1_1746	0.35949	0.714466	0.390382
lcl|NC_013849.1_cds_WP_012966276.1_1747	0.333303	0.587076	0.352875
lcl|NC_013849.1_cds_WP_012966277.1_1748	0.353535	0.727744	0.393883
lcl|NC_013849.1_cds_WP_012966278.1_1749	0.334902	0.68808	0.360092
lcl|NC_013849.1_cds_WP_012966280.1_1751	0.29656	0.589727	0.314071
lcl|NC_013849.1_cds_WP_012966284.1_1755	0.34087	0.689342	0.363938
lcl|NC_013849.1_cds_WP_012966285.1_1756	0.334482	0.674114	0.363384
lcl|NC_013849.1_cds_WP_012966286.1_1757	0.331803	0.680489	0.360065
lcl|NC_013849.1_cds_WP_012966287.1_1758	0.358274	0.677936	0.392977
lcl|NC_013849.1_cds_WP_012966288.1_1759	0.333867	0.70067	0.355375
lcl|NC_013849.1_cds_WP_012966289.1_1760	0.351878	0.682441	0.3838
lcl|NC_013849.1_cds_WP_012966290.1_1761	0.369558	0.642705	0.395357
lcl|NC_013849.1_cds_WP_012966291.1_1762	0.347364	0.547146	0.388366
lcl|NC_013849.1_cds_WP_012966292.1_1763	0.336807	0.648514	0.361406
lcl|NC_013849.1_cds_WP_012966294.1_1765	0.342247	0.692534	0.364702
lcl|NC_013849.1_cds_WP_012966295.1_1766	0.331935	0.723782	0.358638
lcl|NC_013849.1_cds_WP_012966296.1_1767	0.326895	0.683047	0.347192
lcl|NC_013849.1_cds_WP_012966297.1_1768	0.338215	0.684363	0.365542
lcl|NC_013849.1_cds_WP_012966298.1_1769	0.325118	0.690921	0.347731
lcl|NC_013849.1_cds_WP_012966299.1_1770	0.360411	0.734116	0.388818
lcl|NC_013849.1_cds_WP_012966300.1_1771	0.329609	0.597964	0.350805
lcl|NC_013849.1_cds_WP_012966301.1_1772	0.346249	0.727913	0.382001
lcl|NC_013849.1_cds_WP_012966302.1_1773	0.363179	0.728551	0.395352
lcl|NC_013849.1_cds_WP_012966303.1_1774	0.347569	0.681298	0.371879
lcl|NC_013849.1_cds_WP_012966304.1_1776	0.348645	0.687242	0.370865
lcl|NC_013849.1_cds_WP_012966305.1_1777	0.33665	0.704467	0.360498
lcl|NC_013849.1_cds_WP_012966306.1_1778	0.338469	0.669457	0.361896
lcl|NC_013849.1_cds_WP_012966307.1_1779	0.338277	0.695633	0.3628
lcl|NC_013849.1_cds_WP_012966309.1_1781	0.341186	0.65616	0.364049
lcl|NC_013849.1_cds_WP_012966310.1_1782	0.349196	0.704681	0.373511
lcl|NC_013849.1_cds_WP_012966311.1_1783	0.361496	0.725762	0.390061
lcl|NC_013849.1_cds_WP_012966312.1_1784	0.349981	0.715129	0.380307
lcl|NC_013849.1_cds_WP_012966313.1_1785	0.320334	0.700148	0.341976
lcl|NC_013849.1_cds_WP_012966314.1_1786	0.338313	0.761781	0.371741
lcl|NC_013849.1_cds_WP_012966315.1_1787	0.342808	0.705453	0.366198
lcl|NC_013849.1_cds_WP_012966317.1_1788	0.330696	0.696821	0.357818
lcl|NC_013849.1_cds_WP_012966318.1_1789	0.371699	0.728667	0.403089
lcl|NC_013849.1_cds_WP_012966319.1_1790	0.332926	0.682016	0.357052
lcl|NC_013849.1_cds_WP_012966320.1_1791	0.347045	0.747609	0.370317
lcl|NC_013849.1_cds_WP_012966321.1_1792	0.336105	0.660387	0.358034
lcl|NC_013849.1_cds_WP_012966322.1_1793	0.346713	0.650452	0.376594
lcl|NC_013849.1_cds_WP_012966323.1_1794	0.346794	0.761338	0.373438
lcl|NC_013849.1_cds_WP_012966324.1_1795	0.335328	0.693049	0.360022
lcl|NC_013849.1_cds_WP_012966325.1_1796	0.326661	0.667704	0.346374
lcl|NC_013849.1_cds_WP_012966326.1_1797	0.334382	0.641088	0.356766
lcl|NC_013849.1_cds_WP_012966327.1_1798	0.340856	0.639198	0.365461
lcl|NC_013849.1_cds_WP_012966328.1_1799	0.343988	0.674943	0.366928
lcl|NC_013849.1_cds_WP_012966329.1_1800	0.317329	0.72964	0.343989
lcl|NC_013849.1_cds_WP_012966330.1_1801	0.307342	0.609747	0.322679
lcl|NC_013849.1_cds_WP_012966332.1_1803	0.309098	0.619587	0.32824
lcl|NC_013849.1_cds_WP_012966334.1_1805	0.336068	0.625824	0.368844
lcl|NC_013849.1_cds_WP_012966335.1_1806	0.316196	0.598845	0.34161
lcl|NC_013849.1_cds_WP_012966336.1_1807	0.301032	0.627009	0.314633
lcl|NC_013849.1_cds_WP_012966337.1_1808	0.283703	0.589876	0.294076
lcl|NC_013849.1_cds_WP_012966339.1_1809	0.352409	0.683659	0.378425
lcl|NC_013849.1_cds_WP_012966340.1_1810	0.339339	0.713369	0.369297
lcl|NC_013849.1_cds_WP_012966341.1_1811	0.343657	0.647992	0.375693
lcl|NC_013849.1_cds_WP_012966342.1_1815	0.298537	0.50692	0.31081
lcl|NC_013849.1_cds_WP_012966343.1_1816	0.303542	0.565109	0.317416
lcl|NC_013849.1_cds_WP_012966344.1_1817	0.311055	0.614986	0.327268
lcl|NC_013849.1_cds_WP_012966345.1_1818	0.300681	0.503135	0.314496
lcl|NC_013849.1_cds_WP_012966346.1_1819	0.306169	0.591472	0.320629
lcl|NC_013849.1_cds_WP_012966347.1_1820	0.303489	0.551439	0.317929
lcl|NC_013849.1_cds_WP_012966348.1_1821	0.33464	0.666429	0.361511
lcl|NC_013849.1_cds_WP_012966349.1_1822	0.333597	0.641441	0.363243
lcl|NC_013849.1_cds_WP_012966350.1_1823	0.340861	0.734107	0.364433
lcl|NC_013849.1_cds_WP_012966351.1_1824	0.342878	0.684333	0.367994
lcl|NC_013849.1_cds_WP_012966352.1_1825	0.357697	0.764161	0.384322
lcl|NC_013849.1_cds_WP_012966353.1_1826	0.320076	0.635673	0.339108
lcl|NC_013849.1_cds_WP_012966354.1_1827	0.333428	0.678067	0.359052
lcl|NC_013849.1_cds_WP_012966355.1_1829	0.306568	0.619684	0.323333
lcl|NC_013849.1_cds_WP_012966356.1_1830	0.350403	0.73328	0.380905
lcl|NC_013849.1_cds_WP_012966357.1_1831	0.319655	0.658044	0.339355
lcl|NC_013849.1_cds_WP_012966358.1_1832	0.355916	0.690473	0.391137
lcl|NC_013849.1_cds_WP_012966359.1_1833	0.35488	0.711232	0.382187
lcl|NC_013849.1_cds_WP_012966360.1_1834	0.330609	0.513075	0.353902
lcl|NC_013849.1_cds_WP_012966362.1_1835	0.301439	0.535197	0.311665
lcl|NC_013849.1_cds_WP_012966363.1_1836	0.334425	0.672849	0.351633
lcl|NC_013849.1_cds_WP_012966364.1_1837	0.342804	0.676611	0.370458
lcl|NC_013849.1_cds_WP_012966365.1_1838	0.356685	0.714407	0.386597
lcl|NC_013849.1_cds_WP_012966366.1_1839	0.349114	0.702979	0.381328
lcl|NC_013849.1_cds_WP_012966367.1_1840	0.351233	0.718133	0.37695
lcl|NC_013849.1_cds_WP_012966368.1_1841	0.311118	0.692648	0.332838
lcl|NC_013849.1_cds_WP_012966369.1_1842	0.350017	0.751267	0.389322
lcl|NC_013849.1_cds_WP_012966370.1_1843	0.344693	0.679357	0.369369
lcl|NC_013849.1_cds_WP_012966372.1_1845	0.349383	0.666806	0.376831
lcl|NC_013849.1_cds_WP_012966373.1_1846	0.351849	0.696669	0.377083
lcl|NC_013849.1_cds_WP_012966374.1_1847	0.329542	0.640844	0.350513
lcl|NC_013849.1_cds_WP_012966375.1_1848	0.321785	0.651636	0.341367
lcl|NC_013849.1_cds_WP_012966376.1_1849	0.375079	0.680188	0.414518
lcl|NC_013849.1_cds_WP_012966378.1_1851	0.344613	0.680573	0.369853
lcl|NC_013849.1_cds_WP_012966379.1_1852	0.371094	0.655028	0.40192
lcl|NC_013849.1_cds_WP_012966380.1_1853	0.325669	0.643992	0.351373
lcl|NC_013849.1_cds_WP_012966381.1_1854	0.32544	0.627627	0.345304
lcl|NC_013849.1_cds_WP_012966382.1_1856	0.339539	0.664036	0.36471
lcl|NC_013849.1_cds_WP_012966384.1_1859	0.341849	0.648955	0.364434
lcl|NC_013849.1_cds_WP_012966385.1_1860	0.342491	0.657114	0.364979
lcl|NC_013849.1_cds_WP_012966387.1_1862	0.327853	0.669363	0.346514
lcl|NC_013849.1_cds_WP_012966388.1_1863	0.326089	0.618488	0.343578
lcl|NC_013849.1_cds_WP_012966389.1_1864	0.30508	0.607542	0.322729
lcl|NC_013849.1_cds_WP_012966390.1_1865	0.308965	0.591574	0.324845
lcl|NC_013849.1_cds_WP_012966391.1_1866	0.320274	0.582824	0.339371
lcl|NC_013849.1_cds_WP_012966392.1_1867	0.332713	0.643185	0.353026
lcl|NC_013849.1_cds_WP_012966393.1_1868	0.30706	0.62486	0.326026
lcl|NC_013849.1_cds_WP_012966394.1_1869	0.317001	0.61866	0.339801
lcl|NC_013849.1_cds_WP_012966395.1_1870	0.329123	0.628158	0.351567
lcl|NC_013849.1_cds_WP_012966396.1_1872	0.33129	0.63089	0.363291
lcl|NC_013849.1_cds_WP_012966396.1_2069	0.33129	0.63089	0.363291
lcl|NC_013849.1_cds_WP_012966396.1_2212	0.33129	0.63089	0.363291
lcl|NC_013849.1_cds_WP_012966396.1_2404	0.33129	0.63089	0.363291
lcl|NC_013849.1_cds_WP_012966396.1_2464	0.33129	0.63089	0.363291
lcl|NC_013849.1_cds_WP_012966397.1_1874	0.334824	0.633287	0.356563
lcl|NC_013849.1_cds_WP_012966398.1_1875	0.319397	0.661992	0.336894
lcl|NC_013849.1_cds_WP_012966399.1_1876	0.325792	0.60805	0.342226
lcl|NC_013849.1_cds_WP_012966400.1_1877	0.312645	0.626316	0.330632
lcl|NC_013849.1_cds_WP_012966402.1_1880	0.302939	0.560976	0.319368
lcl|NC_013849.1_cds_WP_012966403.1_1881	0.344281	0.617399	0.366446
lcl|NC_013849.1_cds_WP_012966404.1_1882	0.327701	0.601646	0.345075
lcl|NC_013849.1_cds_WP_012966405.1_1883	0.321653	0.54367	0.347452
lcl|NC_013849.1_cds_WP_012966406.1_1884	0.316892	0.60185	0.332567
lcl|NC_013849.1_cds_WP_012966407.1_1885	0.326059	0.603758	0.346268
lcl|NC_013849.1_cds_WP_012966408.1_1886	0.353365	0.708264	0.380358
lcl|NC_013849.1_cds_WP_012966409.1_1887	0.339237	0.627261	0.358446
lcl|NC_013849.1_cds_WP_012966410.1_1888	0.315674	0.643585	0.330216
lcl|NC_013849.1_cds_WP_012966411.1_1889	0.351021	0.697231	0.380009
lcl|NC_013849.1_cds_WP_012966412.1_1890	0.352144	0.722775	0.385039
lcl|NC_013849.1_cds_WP_012966413.1_1891	0.32849	0.700694	0.355681
lcl|NC_013849.1_cds_WP_012966414.1_1892	0.364113	0.737255	0.395147
lcl|NC_013849.1_cds_WP_012966415.1_1893	0.327938	0.628712	0.354188
lcl|NC_013849.1_cds_WP_012966416.1_1894	0.305368	0.634513	0.323076
lcl|NC_013849.1_cds_WP_012966417.1_1895	0.343932	0.696779	0.370703
lcl|NC_013849.1_cds_WP_012966418.1_1896	0.344147	0.691871	0.374302
lcl|NC_013849.1_cds_WP_012966419.1_1897	0.348481	0.708747	0.374648
lcl|NC_013849.1_cds_WP_012966421.1_1899	0.33041	0.681493	0.352123
lcl|NC_013849.1_cds_WP_012966422.1_1900	0.363598	0.73614	0.396891
lcl|NC_013849.1_cds_WP_012966423.1_1901	0.341116	0.705789	0.364098
lcl|NC_013849.1_cds_WP_012966424.1_1902	0.319037	0.645792	0.335964
lcl|NC_013849.1_cds_WP_012966425.1_1903	0.327654	0.692775	0.3491
lcl|NC_013849.1_cds_WP_012966427.1_1905	0.352874	0.722621	0.385252
lcl|NC_013849.1_cds_WP_012966428.1_1906	0.345047	0.703909	0.379836
lcl|NC_013849.1_cds_WP_012966429.1_1907	0.327463	0.627679	0.349468
lcl|NC_013849.1_cds_WP_012966430.1_1908	0.342675	0.687069	0.366651
lcl|NC_013849.1_cds_WP_012966431.1_1909	0.354153	0.75319	0.380239
lcl|NC_013849.1_cds_WP_012966432.1_1910	0.36728	0.744566	0.400868
lcl|NC_013849.1_cds_WP_012966433.1_1911	0.325886	0.595731	0.348372
lcl|NC_013849.1_cds_WP_012966434.1_1912	0.354968	0.651227	0.383124
lcl|NC_013849.1_cds_WP_012966436.1_1914	0.329848	0.716761	0.349658
lcl|NC_013849.1_cds_WP_012966437.1_1915	0.331744	0.69629	0.357631
lcl|NC_013849.1_cds_WP_012966438.1_1916	0.362028	0.647488	0.404482
lcl|NC_013849.1_cds_WP_012966439.1_1917	0.40004	0.742994	0.451371
lcl|NC_013849.1_cds_WP_012966440.1_1918	0.343405	0.754518	0.36974
lcl|NC_013849.1_cds_WP_012966441.1_1919	0.361868	0.668907	0.399545
lcl|NC_013849.1_cds_WP_012966442.1_1920	0.302245	0.542996	0.315873
lcl|NC_013849.1_cds_WP_012966444.1_1922	0.330298	0.681401	0.352909
lcl|NC_013849.1_cds_WP_012966445.1_1923	0.324048	0.679503	0.346404
lcl|NC_013849.1_cds_WP_012966446.1_1924	0.32143	0.637273	0.339737
lcl|NC_013849.1_cds_WP_012966447.1_1925	0.321305	0.616875	0.34325
lcl|NC_013849.1_cds_WP_012966448.1_1926	0.311705	0.650387	0.331069
lcl|NC_013849.1_cds_WP_012966449.1_1927	0.359516	0.671738	0.390135
lcl|NC_013849.1_cds_WP_012966451.1_1929	0.325727	0.701919	0.350453
lcl|NC_013849.1_cds_WP_012966452.1_1930	0.348402	0.698634	0.375371
lcl|NC_013849.1_cds_WP_012966453.1_1931	0.327693	0.666031	0.352535
lcl|NC_013849.1_cds_WP_012966454.1_1932	0.328248	0.696257	0.351108
lcl|NC_013849.1_cds_WP_012966455.1_1933	0.328573	0.696736	0.348263
lcl|NC_013849.1_cds_WP_012966456.1_1934	0.33685	0.74309	0.361234
lcl|NC_013849.1_cds_WP_012966457.1_1935	0.349699	0.71224	0.379092
lcl|NC_013849.1_cds_WP_012966458.1_1936	0.340977	0.668843	0.370033
lcl|NC_013849.1_cds_WP_012966459.1_1937	0.353737	0.738971	0.379498
lcl|NC_013849.1_cds_WP_012966460.1_1938	0.361987	0.731655	0.390792
lcl|NC_013849.1_cds_WP_012966461.1_1939	0.357362	0.70436	0.383921
lcl|NC_013849.1_cds_WP_012966462.1_1940	0.376744	0.707819	0.407929
lcl|NC_013849.1_cds_WP_012966463.1_1941	0.343975	0.698275	0.367496
lcl|NC_013849.1_cds_WP_012966464.1_1942	0.339294	0.705784	0.364246
lcl|NC_013849.1_cds_WP_012966466.1_1944	0.290044	0.597669	0.302072
lcl|NC_013849.1_cds_WP_012966467.1_1945	0.355778	0.678879	0.385013
lcl|NC_013849.1_cds_WP_012966468.1_1946	0.340863	0.789034	0.358047
lcl|NC_013849.1_cds_WP_012966469.1_1947	0.35567	0.703664	0.383022
lcl|NC_013849.1_cds_WP_012966471.1_1949	0.320332	0.698081	0.338368
lcl|NC_013849.1_cds_WP_012966472.1_1950	0.33059	0.681093	0.353034
lcl|NC_013849.1_cds_WP_012966473.1_1951	0.321899	0.648649	0.343021
lcl|NC_013849.1_cds_WP_012966474.1_1952	0.319067	0.698988	0.34046
lcl|NC_013849.1_cds_WP_012966475.1_1953	0.343571	0.649851	0.369184
lcl|NC_013849.1_cds_WP_012966476.1_1954	0.319999	0.664995	0.342509
lcl|NC_013849.1_cds_WP_012966477.1_1955	0.343001	0.716393	0.366247
lcl|NC_013849.1_cds_WP_012966479.1_1957	0.325861	0.721753	0.349098
lcl|NC_013849.1_cds_WP_012966481.1_1958	0.329305	0.610998	0.349785
lcl|NC_013849.1_cds_WP_012966482.1_1959	0.313129	0.577593	0.325557
lcl|NC_013849.1_cds_WP_012966483.1_1960	0.356265	0.743713	0.385566
lcl|NC_013849.1_cds_WP_012966484.1_1961	0.318162	0.671489	0.338063
lcl|NC_013849.1_cds_WP_012966485.1_1962	0.357279	0.71974	0.386372
lcl|NC_013849.1_cds_WP_012966486.1_1963	0.348302	0.736436	0.373132
lcl|NC_013849.1_cds_WP_012966487.1_1964	0.324794	0.658756	0.34871
lcl|NC_013849.1_cds_WP_012966488.1_1965	0.334608	0.646302	0.355713
lcl|NC_013849.1_cds_WP_012966489.1_1966	0.325607	0.703269	0.351575
lcl|NC_013849.1_cds_WP_012966490.1_1967	0.317103	0.686927	0.333524
lcl|NC_013849.1_cds_WP_012966491.1_1968	0.351779	0.706677	0.380084
lcl|NC_013849.1_cds_WP_012966492.1_1969	0.33051	0.703274	0.354652
lcl|NC_013849.1_cds_WP_012966494.1_1971	0.381916	0.749801	0.420702
lcl|NC_013849.1_cds_WP_012966495.1_1972	0.349715	0.689526	0.372213
lcl|NC_013849.1_cds_WP_012966497.1_1974	0.330755	0.631755	0.35113
lcl|NC_013849.1_cds_WP_012966498.1_1975	0.355165	0.751184	0.381244
lcl|NC_013849.1_cds_WP_012966499.1_1976	0.339014	0.705479	0.365948
lcl|NC_013849.1_cds_WP_012966500.1_1977	0.338128	0.713173	0.362858
lcl|NC_013849.1_cds_WP_012966501.1_1978	0.341747	0.698855	0.371217
lcl|NC_013849.1_cds_WP_012966503.1_1980	0.349398	0.705213	0.377674
lcl|NC_013849.1_cds_WP_012966504.1_1981	0.349599	0.698955	0.385777
lcl|NC_013849.1_cds_WP_012966505.1_1982	0.327264	0.693849	0.348318
lcl|NC_013849.1_cds_WP_012966507.1_1984	0.344431	0.674864	0.370187
lcl|NC_013849.1_cds_WP_012966508.1_1985	0.372604	0.746996	0.395904
lcl|NC_013849.1_cds_WP_012966511.1_1989	0.357872	0.702053	0.399133
lcl|NC_013849.1_cds_WP_012966514.1_1992	0.339089	0.625313	0.376254
lcl|NC_013849.1_cds_WP_012966516.1_1994	0.356526	0.679086	0.391691
lcl|NC_013849.1_cds_WP_012966517.1_1995	0.354104	0.671153	0.384148
lcl|NC_013849.1_cds_WP_012966520.1_1997	0.321949	0.566758	0.338625
lcl|NC_013849.1_cds_WP_012966521.1_1998	0.34077	0.676922	0.366256
lcl|NC_013849.1_cds_WP_012966522.1_1999	0.339283	0.607235	0.352202
lcl|NC_013849.1_cds_WP_012966523.1_2000	0.311801	0.625215	0.328691
lcl|NC_013849.1_cds_WP_012966524.1_2001	0.348918	0.65912	0.384506
lcl|NC_013849.1_cds_WP_012966525.1_2002	0.322514	0.624117	0.346232
lcl|NC_013849.1_cds_WP_012966526.1_2004	0.33129	0.63089	0.363291
lcl|NC_013849.1_cds_WP_012966527.1_2005	0.331417	0.608712	0.355644
lcl|NC_013849.1_cds_WP_012966528.1_2006	0.34424	0.579328	0.364027
lcl|NC_013849.1_cds_WP_012966529.1_2007	0.347887	0.683821	0.371872
lcl|NC_013849.1_cds_WP_012966530.1_2008	0.36262	0.677859	0.393033
lcl|NC_013849.1_cds_WP_012966531.1_2009	0.334604	0.62098	0.356006
lcl|NC_013849.1_cds_WP_012966532.1_2010	0.318878	0.610693	0.34197
lcl|NC_013849.1_cds_WP_012966533.1_2011	0.339005	0.676716	0.363884
lcl|NC_013849.1_cds_WP_012966534.1_2012	0.330466	0.667852	0.357469
lcl|NC_013849.1_cds_WP_012966535.1_2013	0.352607	0.735728	0.378917
lcl|NC_013849.1_cds_WP_012966536.1_2014	0.382163	0.737211	0.419403
lcl|NC_013849.1_cds_WP_012966537.1_2015	0.329228	0.571606	0.346623
lcl|NC_013849.1_cds_WP_012966539.1_2017	0.350495	0.585278	0.372056
lcl|NC_013849.1_cds_WP_012966540.1_2019	0.347023	0.679589	0.380221
lcl|NC_013849.1_cds_WP_012966541.1_2020	0.312302	0.63316	0.330419
lcl|NC_013849.1_cds_WP_012966542.1_2022	0.313187	0.561208	0.332542
lcl|NC_013849.1_cds_WP_012966544.1_2023	0.331955	0.578687	0.355485
lcl|NC_013849.1_cds_WP_012966545.1_2024	0.327497	0.584743	0.340348
lcl|NC_013849.1_cds_WP_012966546.1_2025	0.308509	0.596254	0.325356
lcl|NC_013849.1_cds_WP_012966547.1_2026	0.345189	0.622765	0.359281
lcl|NC_013849.1_cds_WP_012966548.1_2028	0.32936	0.676031	0.351433
lcl|NC_013849.1_cds_WP_012966549.1_2029	0.330397	0.656576	0.351261
lcl|NC_013849.1_cds_WP_012966550.1_2030	0.346428	0.636805	0.368218
lcl|NC_013849.1_cds_WP_012966551.1_2031	0.3483	0.680223	0.373614
lcl|NC_013849.1_cds_WP_012966552.1_2032	0.326852	0.668713	0.349505
lcl|NC_013849.1_cds_WP_012966554.1_2034	0.346426	0.706657	0.371012
lcl|NC_013849.1_cds_WP_012966555.1_2035	0.325672	0.631656	0.342411
lcl|NC_013849.1_cds_WP_012966556.1_2036	0.330914	0.636243	0.356205
lcl|NC_013849.1_cds_WP_012966557.1_2037	0.333885	0.670025	0.360355
lcl|NC_013849.1_cds_WP_012966558.1_2038	0.355041	0.701296	0.384106
lcl|NC_013849.1_cds_WP_012966559.1_2039	0.363643	0.717246	0.393404
lcl|NC_013849.1_cds_WP_012966560.1_2040	0.360799	0.700447	0.383554
lcl|NC_013849.1_cds_WP_012966561.1_2041	0.343696	0.700821	0.368342
lcl|NC_013849.1_cds_WP_012966563.1_2043	0.324094	0.721571	0.346096
lcl|NC_013849.1_cds_WP_012966564.1_2044	0.300846	0.620757	0.314562
lcl|NC_013849.1_cds_WP_012966566.1_2046	0.307368	0.543266	0.318948
lcl|NC_013849.1_cds_WP_012966567.1_2047	0.328762	0.595568	0.344746
lcl|NC_013849.1_cds_WP_012966568.1_2049	0.343634	0.653923	0.366343
lcl|NC_013849.1_cds_WP_012966570.1_2050	0.358008	0.73917	0.387059
lcl|NC_013849.1_cds_WP_012966571.1_2051	0.384993	0.74689	0.423665
lcl|NC_013849.1_cds_WP_012966572.1_2052	0.335109	0.663279	0.35522
lcl|NC_013849.1_cds_WP_012966573.1_2053	0.344419	0.708207	0.368484
lcl|NC_013849.1_cds_WP_012966574.1_2054	0.339004	0.635682	0.368866
lcl|NC_013849.1_cds_WP_012966575.1_2055	0.33744	0.746964	0.361313
lcl|NC_013849.1_cds_WP_012966576.1_2056	0.354655	0.732731	0.382554
lcl|NC_013849.1_cds_WP_012966577.1_2057	0.331813	0.732347	0.352111
lcl|NC_013849.1_cds_WP_012966578.1_2058	0.335278	0.689518	0.359017
lcl|NC_013849.1_cds_WP_012966579.1_2059	0.323462	0.643279	0.344625
lcl|NC_013849.1_cds_WP_012966580.1_2060	0.35584	0.718615	0.384341
lcl|NC_013849.1_cds_WP_012966581.1_2061	0.348422	0.705688	0.375915
lcl|NC_013849.1_cds_WP_012966582.1_2062	0.325177	0.745475	0.35005
lcl|NC_013849.1_cds_WP_012966583.1_2063	0.349759	0.662566	0.372004
lcl|NC_013849.1_cds_WP_012966584.1_2064	0.347274	0.694078	0.374649
lcl|NC_013849.1_cds_WP_012966587.1_2066	0.356285	0.693827	0.388596
lcl|NC_013849.1_cds_WP_012966588.1_2067	0.345829	0.671396	0.371155
lcl|NC_013849.1_cds_WP_012966589.1_2068	0.348359	0.731861	0.377689
lcl|NC_013849.1_cds_WP_012966590.1_2070	0.31588	0.646095	0.334951
lcl|NC_013849.1_cds_WP_012966591.1_2071	0.349273	0.68792	0.37631
lcl|NC_013849.1_cds_WP_012966592.1_2072	0.345031	0.631285	0.368016
lcl|NC_013849.1_cds_WP_012966593.1_2073	0.349819	0.724477	0.375851
lcl|NC_013849.1_cds_WP_012966594.1_2074	0.327371	0.699454	0.352701
lcl|NC_013849.1_cds_WP_012966595.1_2075	0.344216	0.714417	0.36849
lcl|NC_013849.1_cds_WP_012966596.1_2076	0.357497	0.688839	0.381718
lcl|NC_013849.1_cds_WP_012966597.1_2077	0.330085	0.706204	0.356007
lcl|NC_013849.1_cds_WP_012966598.1_2078	0.336511	0.737877	0.359997
lcl|NC_013849.1_cds_WP_012966601.1_2081	0.325312	0.680736	0.350374
lcl|NC_013849.1_cds_WP_012966602.1_2082	0.337559	0.714215	0.362647
lcl|NC_013849.1_cds_WP_012966603.1_2083	0.366204	0.718897	0.396346
lcl|NC_013849.1_cds_WP_012966604.1_2084	0.360951	0.746415	0.394189
lcl|NC_013849.1_cds_WP_012966605.1_2085	0.353141	0.716873	0.37728
lcl|NC_013849.1_cds_WP_012966606.1_2086	0.330271	0.650366	0.35251
lcl|NC_013849.1_cds_WP_012966607.1_2087	0.352444	0.732482	0.386044
lcl|NC_013849.1_cds_WP_012966608.1_2088	0.340775	0.695468	0.367244
lcl|NC_013849.1_cds_WP_012966609.1_2089	0.352573	0.686217	0.381632
lcl|NC_013849.1_cds_WP_012966610.1_2090	0.349746	0.714599	0.375215
lcl|NC_013849.1_cds_WP_012966612.1_2092	0.338889	0.643444	0.358643
lcl|NC_013849.1_cds_WP_012966613.1_2093	0.356321	0.712938	0.388836
lcl|NC_013849.1_cds_WP_012966614.1_2094	0.351322	0.702273	0.377326
lcl|NC_013849.1_cds_WP_012966615.1_2095	0.349453	0.68569	0.37795
lcl|NC_013849.1_cds_WP_012966616.1_2096	0.348289	0.69883	0.37735
lcl|NC_013849.1_cds_WP_012966617.1_2097	0.331796	0.630911	0.352168
lcl|NC_013849.1_cds_WP_012966618.1_2098	0.339038	0.649318	0.359273
lcl|NC_013849.1_cds_WP_012966619.1_2099	0.336073	0.695043	0.36149
lcl|NC_013849.1_cds_WP_012966620.1_2100	0.357073	0.70608	0.381879
lcl|NC_013849.1_cds_WP_012966621.1_2101	0.352105	0.713629	0.383339
lcl|NC_013849.1_cds_WP_012966623.1_2103	0.342752	0.661449	0.367408
lcl|NC_013849.1_cds_WP_012966625.1_2104	0.323727	0.637183	0.34502
lcl|NC_013849.1_cds_WP_012966626.1_2105	0.337686	0.676466	0.362384
lcl|NC_013849.1_cds_WP_012966627.1_2106	0.323669	0.710806	0.347758
lcl|NC_013849.1_cds_WP_012966629.1_2108	0.328889	0.693487	0.353353
lcl|NC_013849.1_cds_WP_012966630.1_2109	0.34518	0.691289	0.376598
lcl|NC_013849.1_cds_WP_012966631.1_2110	0.351997	0.749263	0.38764
lcl|NC_013849.1_cds_WP_012966632.1_2111	0.342372	0.721372	0.368398
lcl|NC_013849.1_cds_WP_012966634.1_2112	0.318928	0.625536	0.33767
lcl|NC_013849.1_cds_WP_012966635.1_2113	0.333174	0.627561	0.354911
lcl|NC_013849.1_cds_WP_012966636.1_2115	0.291867	0.530517	0.303719
lcl|NC_013849.1_cds_WP_012966637.1_2116	0.328993	0.677268	0.358494
lcl|NC_013849.1_cds_WP_012966638.1_2117	0.346662	0.631429	0.374524
lcl|NC_013849.1_cds_WP_012966639.1_2119	0.3106	0.581567	0.330776
lcl|NC_013849.1_cds_WP_012966640.1_2120	0.322456	0.556345	0.338751
lcl|NC_013849.1_cds_WP_012966641.1_2121	0.329945	0.63823	0.355282
lcl|NC_013849.1_cds_WP_012966642.1_2122	0.352565	0.70231	0.377939
lcl|NC_013849.1_cds_WP_012966643.1_2123	0.335641	0.685931	0.362132
lcl|NC_013849.1_cds_WP_012966644.1_2124	0.353382	0.702275	0.384765
lcl|NC_013849.1_cds_WP_012966645.1_2125	0.341848	0.682785	0.365718
lcl|NC_013849.1_cds_WP_012966646.1_2126	0.323582	0.629538	0.339664
lcl|NC_013849.1_cds_WP_012966647.1_2127	0.362393	0.736659	0.391557
lcl|NC_013849.1_cds_WP_012966648.1_2128	0.337006	0.687609	0.36341
lcl|NC_013849.1_cds_WP_012966649.1_2129	0.339002	0.686821	0.364462
lcl|NC_013849.1_cds_WP_012966650.1_2130	0.335689	0.723247	0.360418
lcl|NC_013849.1_cds_WP_012966651.1_2131	0.357024	0.719579	0.388271
lcl|NC_013849.1_cds_WP_012966653.1_2132	0.34764	0.719557	0.373894
lcl|NC_013849.1_cds_WP_012966654.1_2133	0.354602	0.736138	0.392686
lcl|NC_013849.1_cds_WP_012966655.1_2134	0.306277	0.598381	0.321215
lcl|NC_013849.1_cds_WP_012966656.1_2135	0.335334	0.662502	0.364296
lcl|NC_013849.1_cds_WP_012966657.1_2136	0.369701	0.658192	0.411041
lcl|NC_013849.1_cds_WP_012966658.1_2137	0.315829	0.557375	0.337669
lcl|NC_013849.1_cds_WP_012966660.1_2139	0.301728	0.580735	0.315507
lcl|NC_013849.1_cds_WP_012966661.1_2140	0.351866	0.686289	0.375044
lcl|NC_013849.1_cds_WP_012966662.1_2141	0.375126	0.698225	0.411458
lcl|NC_013849.1_cds_WP_012966664.1_2143	0.373828	0.754193	0.413041
lcl|NC_013849.1_cds_WP_012966665.1_2144	0.3422	0.688473	0.36893
lcl|NC_013849.1_cds_WP_012966666.1_2145	0.340189	0.731158	0.359375
lcl|NC_013849.1_cds_WP_012966667.1_2146	0.333679	0.707874	0.360791
lcl|NC_013849.1_cds_WP_012966668.1_2147	0.317473	0.653621	0.337271
lcl|NC_013849.1_cds_WP_012966669.1_2149	0.339622	0.681139	0.367274
lcl|NC_013849.1_cds_WP_012966670.1_2150	0.340563	0.684682	0.362591
lcl|NC_013849.1_cds_WP_012966671.1_2151	0.354153	0.672165	0.382865
lcl|NC_013849.1_cds_WP_012966672.1_2153	0.312385	0.662158	0.334389
lcl|NC_013849.1_cds_WP_012966673.1_2154	0.392491	0.75811	0.434673
lcl|NC_013849.1_cds_WP_012966674.1_2155	0.37198	0.756756	0.41282
lcl|NC_013849.1_cds_WP_012966675.1_2156	0.3465	0.704218	0.374641
lcl|NC_013849.1_cds_WP_012966676.1_2157	0.336593	0.688015	0.368012
lcl|NC_013849.1_cds_WP_012966677.1_2158	0.341167	0.699438	0.370864
lcl|NC_013849.1_cds_WP_012966678.1_2159	0.352202	0.727597	0.37839
lcl|NC_013849.1_cds_WP_012966680.1_2161	0.3319	0.742217	0.350728
lcl|NC_013849.1_cds_WP_012966681.1_2162	0.355759	0.721064	0.381467
lcl|NC_013849.1_cds_WP_012966682.1_2163	0.343553	0.703535	0.36917
lcl|NC_013849.1_cds_WP_012966683.1_2164	0.347234	0.736131	0.3776
lcl|NC_013849.1_cds_WP_012966684.1_2165	0.336624	0.7035	0.360821
lcl|NC_013849.1_cds_WP_012966686.1_2167	0.360187	0.637711	0.39681
lcl|NC_013849.1_cds_WP_012966687.1_2168	0.340157	0.674968	0.360608
lcl|NC_013849.1_cds_WP_012966689.1_2170	0.3785	0.679919	0.421014
lcl|NC_013849.1_cds_WP_012966690.1_2171	0.37739	0.729354	0.414659
lcl|NC_013849.1_cds_WP_012966691.1_2172	0.343665	0.665136	0.368614
lcl|NC_013849.1_cds_WP_012966692.1_2173	0.358581	0.740766	0.386971
lcl|NC_013849.1_cds_WP_012966694.1_2175	0.344532	0.695223	0.368739
lcl|NC_013849.1_cds_WP_012966695.1_2176	0.355536	0.704162	0.394029
lcl|NC_013849.1_cds_WP_012966696.1_2177	0.333045	0.751789	0.351052
lcl|NC_013849.1_cds_WP_012966697.1_2178	0.347904	0.708997	0.375743
lcl|NC_013849.1_cds_WP_012966698.1_2179	0.351564	0.698755	0.380242
lcl|NC_013849.1_cds_WP_012966699.1_2180	0.356813	0.683799	0.38804
lcl|NC_013849.1_cds_WP_012966700.1_2181	0.345903	0.695705	0.37722
lcl|NC_013849.1_cds_WP_012966701.1_2182	0.351835	0.765714	0.373592
lcl|NC_013849.1_cds_WP_012966702.1_2183	0.351104	0.70418	0.380852
lcl|NC_013849.1_cds_WP_012966703.1_2184	0.342308	0.678362	0.367914
lcl|NC_013849.1_cds_WP_012966704.1_2185	0.369519	0.728556	0.401468
lcl|NC_013849.1_cds_WP_012966705.1_2186	0.337242	0.7184	0.365913
lcl|NC_013849.1_cds_WP_012966706.1_2187	0.334619	0.702574	0.356307
lcl|NC_013849.1_cds_WP_012966708.1_2190	0.350005	0.681288	0.379757
lcl|NC_013849.1_cds_WP_012966709.1_2191	0.332067	0.670527	0.354621
lcl|NC_013849.1_cds_WP_012966710.1_2192	0.339728	0.717833	0.368365
lcl|NC_013849.1_cds_WP_012966711.1_2193	0.353013	0.697763	0.383326
lcl|NC_013849.1_cds_WP_012966712.1_2194	0.344003	0.706253	0.367148
lcl|NC_013849.1_cds_WP_012966713.1_2195	0.348764	0.709031	0.378568
lcl|NC_013849.1_cds_WP_012966714.1_2196	0.356882	0.773169	0.385759
lcl|NC_013849.1_cds_WP_012966715.1_2197	0.349514	0.70726	0.378794
lcl|NC_013849.1_cds_WP_012966718.1_2199	0.348205	0.643262	0.377778
lcl|NC_013849.1_cds_WP_012966719.1_2200	0.35044	0.577391	0.385654
lcl|NC_013849.1_cds_WP_012966720.1_2201	0.331928	0.695113	0.355667
lcl|NC_013849.1_cds_WP_012966721.1_2202	0.342694	0.721296	0.368879
lcl|NC_013849.1_cds_WP_012966722.1_2203	0.335347	0.655873	0.357895
lcl|NC_013849.1_cds_WP_012966723.1_2204	0.358304	0.670122	0.39231
lcl|NC_013849.1_cds_WP_012966724.1_2205	0.315464	0.68175	0.33308
lcl|NC_013849.1_cds_WP_012966726.1_2206	0.358331	0.767564	0.386355
lcl|NC_013849.1_cds_WP_012966727.1_2207	0.331873	0.701639	0.3529
lcl|NC_013849.1_cds_WP_012966728.1_2208	0.381698	0.746757	0.421376
lcl|NC_013849.1_cds_WP_012966729.1_2209	0.369793	0.585283	0.408038
lcl|NC_013849.1_cds_WP_012966730.1_2210	0.34927	0.687943	0.377662
lcl|NC_013849.1_cds_WP_012966731.1_2211	0.352993	0.710176	0.385177
lcl|NC_013849.1_cds_WP_012966732.1_2213	0.351664	0.702822	0.383066
lcl|NC_013849.1_cds_WP_012966733.1_2214	0.338419	0.700322	0.361226
lcl|NC_013849.1_cds_WP_012966734.1_2215	0.320666	0.709616	0.342859
lcl|NC_013849.1_cds_WP_012966735.1_2216	0.345039	0.697277	0.376344
lcl|NC_013849.1_cds_WP_012966736.1_2217	0.348714	0.691841	0.379005
lcl|NC_013849.1_cds_WP_012966739.1_2220	0.328358	0.661369	0.346251
lcl|NC_013849.1_cds_WP_012966740.1_2221	0.318397	0.65584	0.340621
lcl|NC_013849.1_cds_WP_012966741.1_2222	0.337961	0.756052	0.367288
lcl|NC_013849.1_cds_WP_012966742.1_2223	0.342328	0.676747	0.367723
lcl|NC_013849.1_cds_WP_012966744.1_2225	0.338608	0.663448	0.364666
lcl|NC_013849.1_cds_WP_012966745.1_2226	0.350917	0.693527	0.379615
lcl|NC_013849.1_cds_WP_012966746.1_2227	0.33611	0.721777	0.361191
lcl|NC_013849.1_cds_WP_012966747.1_2228	0.352165	0.72753	0.381858
lcl|NC_013849.1_cds_WP_012966748.1_2229	0.316404	0.677481	0.335826
lcl|NC_013849.1_cds_WP_012966749.1_2230	0.341848	0.685184	0.371371
lcl|NC_013849.1_cds_WP_012966750.1_2231	0.341408	0.672535	0.367127
lcl|NC_013849.1_cds_WP_012966751.1_2232	0.357555	0.689989	0.383161
lcl|NC_013849.1_cds_WP_012966752.1_2233	0.32833	0.623704	0.347338
lcl|NC_013849.1_cds_WP_012966753.1_2234	0.349386	0.736698	0.376671
lcl|NC_013849.1_cds_WP_012966754.1_2235	0.344291	0.74715	0.376491
lcl|NC_013849.1_cds_WP_012966755.1_2236	0.366928	0.699773	0.394213
lcl|NC_013849.1_cds_WP_012966756.1_2237	0.322787	0.628587	0.344424
lcl|NC_013849.1_cds_WP_012966757.1_2238	0.342568	0.704873	0.364749
lcl|NC_013849.1_cds_WP_012966758.1_2239	0.303743	0.559843	0.314636
lcl|NC_013849.1_cds_WP_012966759.1_2240	0.384521	0.755616	0.419999
lcl|NC_013849.1_cds_WP_012966760.1_2241	0.363205	0.637897	0.396195
lcl|NC_013849.1_cds_WP_012966761.1_2242	0.317066	0.723674	0.338154
lcl|NC_013849.1_cds_WP_012966763.1_2243	0.360005	0.740133	0.389644
lcl|NC_013849.1_cds_WP_012966764.1_2244	0.353132	0.732499	0.377957
lcl|NC_013849.1_cds_WP_012966765.1_2245	0.359491	0.725678	0.384484
lcl|NC_013849.1_cds_WP_012966766.1_2246	0.297049	0.688379	0.315444
lcl|NC_013849.1_cds_WP_012966767.1_2247	0.382475	0.725998	0.416749
lcl|NC_013849.1_cds_WP_012966768.1_2248	0.348175	0.744917	0.37886
lcl|NC_013849.1_cds_WP_012966769.1_2249	0.319492	0.616156	0.345678
lcl|NC_013849.1_cds_WP_012966770.1_2250	0.338733	0.669346	0.361826
lcl|NC_013849.1_cds_WP_012966771.1_2251	0.34776	0.738128	0.378067
lcl|NC_013849.1_cds_WP_012966772.1_2252	0.347491	0.727305	0.368234
lcl|NC_013849.1_cds_WP_012966773.1_2253	0.333344	0.667279	0.351333
lcl|NC_013849.1_cds_WP_012966774.1_2254	0.332936	0.634316	0.356275
lcl|NC_013849.1_cds_WP_012966776.1_2255	0.335142	0.622156	0.351866
lcl|NC_013849.1_cds_WP_012966777.1_2256	0.310886	0.649084	0.327013
lcl|NC_013849.1_cds_WP_012966778.1_2257	0.293281	0.65861	0.312536
lcl|NC_013849.1_cds_WP_012966780.1_2260	0.309688	0.620293	0.324486
lcl|NC_013849.1_cds_WP_012966781.1_2261	0.327938	0.677907	0.349699
lcl|NC_013849.1_cds_WP_012966782.1_2262	0.323224	0.584999	0.344966
lcl|NC_013849.1_cds_WP_012966783.1_2263	0.331759	0.673168	0.354945
lcl|NC_013849.1_cds_WP_012966784.1_2264	0.325602	0.687085	0.344604
lcl|NC_013849.1_cds_WP_012966785.1_2265	0.319269	0.65452	0.339483
lcl|NC_013849.1_cds_WP_012966786.1_2269	0.323037	0.659454	0.346046
lcl|NC_013849.1_cds_WP_012966787.1_2270	0.321974	0.701406	0.346646
lcl|NC_013849.1_cds_WP_012966788.1_2271	0.339734	0.669006	0.363374
lcl|NC_013849.1_cds_WP_012966789.1_2272	0.340903	0.66864	0.365865
lcl|NC_013849.1_cds_WP_012966790.1_2273	0.307905	0.685899	0.326216
lcl|NC_013849.1_cds_WP_012966791.1_2274	0.319237	0.654149	0.337153
lcl|NC_013849.1_cds_WP_012966792.1_2275	0.336144	0.716143	0.361092
lcl|NC_013849.1_cds_WP_012966793.1_2276	0.320363	0.539301	0.343618
lcl|NC_013849.1_cds_WP_012966794.1_2280	0.354658	0.666097	0.386584
lcl|NC_013849.1_cds_WP_012966795.1_2281	0.322371	0.715172	0.340003
lcl|NC_013849.1_cds_WP_012966796.1_2283	0.340673	0.64865	0.362627
lcl|NC_013849.1_cds_WP_012966798.1_2285	0.346632	0.700089	0.372558
lcl|NC_013849.1_cds_WP_012966799.1_2286	0.332649	0.649044	0.354494
lcl|NC_013849.1_cds_WP_012966800.1_2287	0.345639	0.676839	0.368271
lcl|NC_013849.1_cds_WP_012966801.1_2288	0.332637	0.681358	0.355927
lcl|NC_013849.1_cds_WP_012966802.1_2289	0.369195	0.649605	0.398892
lcl|NC_013849.1_cds_WP_012966803.1_2290	0.341601	0.701774	0.364848
lcl|NC_013849.1_cds_WP_012966804.1_2291	0.319232	0.706143	0.345834
lcl|NC_013849.1_cds_WP_012966805.1_2292	0.338875	0.649522	0.362851
lcl|NC_013849.1_cds_WP_012966807.1_2294	0.328316	0.615463	0.3498
lcl|NC_013849.1_cds_WP_012966808.1_2295	0.300803	0.585565	0.313943
lcl|NC_013849.1_cds_WP_012966809.1_2296	0.313543	0.564487	0.327991
lcl|NC_013849.1_cds_WP_012966810.1_2297	0.324395	0.621258	0.344839
lcl|NC_013849.1_cds_WP_012966811.1_2299	0.359188	0.719319	0.392302
lcl|NC_013849.1_cds_WP_012966812.1_2300	0.39794	0.695084	0.441694
lcl|NC_013849.1_cds_WP_012966813.1_2301	0.347336	0.709706	0.374762
lcl|NC_013849.1_cds_WP_012966814.1_2302	0.332202	0.684581	0.359759
lcl|NC_013849.1_cds_WP_012966815.1_2303	0.360046	0.704215	0.387206
lcl|NC_013849.1_cds_WP_012966816.1_2304	0.36067	0.704547	0.392552
lcl|NC_013849.1_cds_WP_012966817.1_2305	0.350047	0.649138	0.371077
lcl|NC_013849.1_cds_WP_012966818.1_2306	0.402932	0.646358	0.44389
lcl|NC_013849.1_cds_WP_012966819.1_2307	0.35056	0.671876	0.378235
lcl|NC_013849.1_cds_WP_012966820.1_2308	0.329777	0.670804	0.352263
lcl|NC_013849.1_cds_WP_012966821.1_2309	0.348108	0.706169	0.376045
lcl|NC_013849.1_cds_WP_012966822.1_2310	0.331674	0.698538	0.354319
lcl|NC_013849.1_cds_WP_012966823.1_2311	0.329611	0.577921	0.35099
lcl|NC_013849.1_cds_WP_012966825.1_2313	0.318145	0.67428	0.338481
lcl|NC_013849.1_cds_WP_012966826.1_2314	0.315791	0.674455	0.337234
lcl|NC_013849.1_cds_WP_012966827.1_2315	0.31977	0.6575	0.340079
lcl|NC_013849.1_cds_WP_012966828.1_2316	0.335419	0.644347	0.357645
lcl|NC_013849.1_cds_WP_012966829.1_2317	0.317863	0.641882	0.336684
lcl|NC_013849.1_cds_WP_012966830.1_2318	0.31357	0.642014	0.333581
lcl|NC_013849.1_cds_WP_012966831.1_2319	0.323794	0.674272	0.346422
lcl|NC_013849.1_cds_WP_012966834.1_2322	0.371877	0.664193	0.408507
lcl|NC_013849.1_cds_WP_012966835.1_2323	0.314806	0.673567	0.339632
[truncated: 505 more rows]

## Sheet: Halomicrobium mukohataei
gene id	gtAI	CAI	StAI
lcl|NC_013201.1_cds_3123	0.340441	0.301218	0.38082
lcl|NC_013201.1_cds_3124	0.383352	0.407172	0.390259
lcl|NC_013201.1_cds_3127	0.393856	0.346341	0.407569
lcl|NC_013201.1_cds_3129	0.410055	0.37316	0.405821
lcl|NC_013201.1_cds_3149	0.322898	0.284151	0.38183
lcl|NC_013201.1_cds_3164	0.358024	0.263673	0.382049
lcl|NC_013201.1_cds_3173	0.439695	0.61801	0.405416
lcl|NC_013201.1_cds_3193	0.378176	0.278744	0.390731
lcl|NC_013201.1_cds_3198	0.381535	0.435943	0.388703
lcl|NC_013201.1_cds_3221	0.397375	0.342208	0.409334
lcl|NC_013201.1_cds_3225	0.300741	0.229685	0.371406
lcl|NC_013201.1_cds_3228	0.358024	0.295349	0.382564
lcl|NC_013201.1_cds_WP_012807402.1_3107	0.463474	0.735761	0.426073
lcl|NC_013201.1_cds_WP_012807403.1_3108	0.454963	0.648471	0.408322
lcl|NC_013201.1_cds_WP_012807404.1_3109	0.461533	0.645731	0.414168
lcl|NC_013201.1_cds_WP_012807405.1_3110	0.452398	0.698168	0.414716
lcl|NC_013201.1_cds_WP_012807406.1_3111	0.432552	0.681357	0.403931
lcl|NC_013201.1_cds_WP_012807407.1_3112	0.425304	0.623173	0.408897
lcl|NC_013201.1_cds_WP_012807409.1_3113	0.367785	0.347973	0.385733
lcl|NC_013201.1_cds_WP_012807410.1_3114	0.451668	0.730583	0.415539
lcl|NC_013201.1_cds_WP_012807411.1_3115	0.426009	0.633561	0.390631
lcl|NC_013201.1_cds_WP_012807412.1_3116	0.437379	0.685837	0.40351
lcl|NC_013201.1_cds_WP_012807413.1_3117	0.429649	0.78431	0.393325
lcl|NC_013201.1_cds_WP_012807414.1_3118	0.432855	0.717525	0.40872
lcl|NC_013201.1_cds_WP_012807415.1_3119	0.428907	0.559043	0.387818
lcl|NC_013201.1_cds_WP_012807416.1_3120	0.432083	0.580871	0.39693
lcl|NC_013201.1_cds_WP_012807417.1_3121	0.43103	0.656807	0.401697
lcl|NC_013201.1_cds_WP_012807418.1_3122	0.445563	0.602806	0.401965
lcl|NC_013201.1_cds_WP_012807422.1_3125	0.347564	0.408034	0.385758
lcl|NC_013201.1_cds_WP_012807423.1_3126	0.338637	0.393026	0.377285
lcl|NC_013201.1_cds_WP_012807426.1_3130	0.411251	0.639755	0.394067
lcl|NC_013201.1_cds_WP_012807427.1_3131	0.411493	0.510899	0.393715
lcl|NC_013201.1_cds_WP_012807428.1_3132	0.435035	0.61371	0.407996
lcl|NC_013201.1_cds_WP_012807429.1_3133	0.444611	0.684522	0.402979
lcl|NC_013201.1_cds_WP_012807430.1_3134	0.429592	0.664882	0.39291
lcl|NC_013201.1_cds_WP_012807431.1_3135	0.431145	0.642872	0.396077
lcl|NC_013201.1_cds_WP_012807432.1_3136	0.4449	0.639194	0.40192
lcl|NC_013201.1_cds_WP_012807433.1_3137	0.440148	0.599428	0.397933
lcl|NC_013201.1_cds_WP_012807434.1_3138	0.422464	0.647407	0.401441
lcl|NC_013201.1_cds_WP_012807435.1_3139	0.446098	0.625083	0.406053
lcl|NC_013201.1_cds_WP_012807436.1_3140	0.462262	0.658027	0.416481
lcl|NC_013201.1_cds_WP_012807437.1_3141	0.433481	0.543055	0.408097
lcl|NC_013201.1_cds_WP_012807438.1_3142	0.452998	0.618457	0.406126
lcl|NC_013201.1_cds_WP_012807439.1_3143	0.435986	0.570784	0.398025
lcl|NC_013201.1_cds_WP_012807440.1_3144	0.387581	0.546266	0.398655
lcl|NC_013201.1_cds_WP_012807441.1_3145	0.389973	0.432598	0.401769
lcl|NC_013201.1_cds_WP_012807442.1_3146	0.421199	0.485783	0.407335
lcl|NC_013201.1_cds_WP_012807443.1_3147	0.397255	0.449114	0.406188
lcl|NC_013201.1_cds_WP_012807444.1_3148	0.436541	0.489074	0.404662
lcl|NC_013201.1_cds_WP_012807445.1_3150	0.40818	0.495389	0.381803
lcl|NC_013201.1_cds_WP_012807446.1_3151	0.322043	0.179908	0.392001
lcl|NC_013201.1_cds_WP_012807447.1_3152	0.452532	0.598082	0.40686
lcl|NC_013201.1_cds_WP_012807448.1_3153	0.392606	0.476342	0.387863
lcl|NC_013201.1_cds_WP_012807449.1_3154	0.430869	0.59636	0.397385
lcl|NC_013201.1_cds_WP_012807450.1_3155	0.448072	0.656516	0.407834
lcl|NC_013201.1_cds_WP_012807451.1_3156	0.411476	0.609295	0.391635
lcl|NC_013201.1_cds_WP_012807452.1_3157	0.411692	0.518288	0.396858
lcl|NC_013201.1_cds_WP_012807453.1_3158	0.400706	0.545836	0.385191
lcl|NC_013201.1_cds_WP_012807454.1_3159	0.458831	0.682557	0.391679
lcl|NC_013201.1_cds_WP_012807455.1_3160	0.441098	0.691102	0.407679
lcl|NC_013201.1_cds_WP_012807456.1_3161	0.450801	0.714172	0.395429
lcl|NC_013201.1_cds_WP_012807457.1_3162	0.461505	0.703761	0.424607
lcl|NC_013201.1_cds_WP_012807458.1_3163	0.466985	0.657976	0.418393
lcl|NC_013201.1_cds_WP_012807460.1_3165	0.462644	0.664185	0.406416
lcl|NC_013201.1_cds_WP_012807461.1_3166	0.438703	0.63513	0.402085
lcl|NC_013201.1_cds_WP_012807462.1_3167	0.46464	0.663328	0.405181
lcl|NC_013201.1_cds_WP_012807463.1_3168	0.466201	0.634764	0.407517
lcl|NC_013201.1_cds_WP_012807464.1_3169	0.434611	0.626139	0.410996
lcl|NC_013201.1_cds_WP_012807465.1_3170	0.443745	0.618089	0.418909
lcl|NC_013201.1_cds_WP_012807466.1_3171	0.453353	0.636364	0.40378
lcl|NC_013201.1_cds_WP_012807467.1_3172	0.368238	0.387093	0.393
lcl|NC_013201.1_cds_WP_012807468.1_3174	0.425708	0.689272	0.398276
lcl|NC_013201.1_cds_WP_012807469.1_3175	0.358689	0.362062	0.394297
lcl|NC_013201.1_cds_WP_012807471.1_3176	0.382888	0.502501	0.404041
lcl|NC_013201.1_cds_WP_012807472.1_3177	0.423863	0.652547	0.395108
lcl|NC_013201.1_cds_WP_012807473.1_3178	0.418899	0.582279	0.402012
lcl|NC_013201.1_cds_WP_012807474.1_3179	0.428852	0.651834	0.390002
lcl|NC_013201.1_cds_WP_012807475.1_3180	0.45397	0.676433	0.412555
lcl|NC_013201.1_cds_WP_012807476.1_3181	0.441852	0.689522	0.394006
lcl|NC_013201.1_cds_WP_012807477.1_3182	0.431341	0.613289	0.398172
lcl|NC_013201.1_cds_WP_012807478.1_3183	0.424098	0.512245	0.394203
lcl|NC_013201.1_cds_WP_012807479.1_3184	0.422955	0.543249	0.403176
lcl|NC_013201.1_cds_WP_012807480.1_3185	0.423667	0.67581	0.387566
lcl|NC_013201.1_cds_WP_012807481.1_3186	0.436294	0.699123	0.399195
lcl|NC_013201.1_cds_WP_012807482.1_3187	0.465897	0.625974	0.417784
lcl|NC_013201.1_cds_WP_012807483.1_3188	0.420481	0.551811	0.397638
lcl|NC_013201.1_cds_WP_012807484.1_3189	0.412638	0.428165	0.406487
lcl|NC_013201.1_cds_WP_012807485.1_3190	0.409802	0.593269	0.392732
lcl|NC_013201.1_cds_WP_012807486.1_3191	0.39633	0.575914	0.398804
lcl|NC_013201.1_cds_WP_012807487.1_3192	0.414623	0.562796	0.400224
lcl|NC_013201.1_cds_WP_012807488.1_3194	0.417809	0.609922	0.40262
lcl|NC_013201.1_cds_WP_012807489.1_3195	0.364619	0.431306	0.37952
lcl|NC_013201.1_cds_WP_012807490.1_3196	0.37923	0.38941	0.406039
lcl|NC_013201.1_cds_WP_012807491.1_3197	0.353754	0.2974	0.384675
lcl|NC_013201.1_cds_WP_012807493.1_3199	0.387137	0.490319	0.385299
lcl|NC_013201.1_cds_WP_012807494.1_3200	0.432607	0.725361	0.413994
lcl|NC_013201.1_cds_WP_012807495.1_3201	0.426004	0.62118	0.408901
lcl|NC_013201.1_cds_WP_012807496.1_3202	0.426628	0.638585	0.397905
lcl|NC_013201.1_cds_WP_012807497.1_3203	0.424605	0.615289	0.402309
lcl|NC_013201.1_cds_WP_012807498.1_3204	0.436835	0.682184	0.40347
lcl|NC_013201.1_cds_WP_012807499.1_3205	0.433718	0.694806	0.395166
lcl|NC_013201.1_cds_WP_012807500.1_3206	0.451341	0.669856	0.413341
lcl|NC_013201.1_cds_WP_012807501.1_3207	0.417125	0.678599	0.394443
lcl|NC_013201.1_cds_WP_012807502.1_3208	0.404076	0.55527	0.388201
lcl|NC_013201.1_cds_WP_012807503.1_3209	0.417517	0.526367	0.407114
lcl|NC_013201.1_cds_WP_012807504.1_3210	0.416018	0.461996	0.383489
lcl|NC_013201.1_cds_WP_012807505.1_3211	0.39956	0.566042	0.391922
lcl|NC_013201.1_cds_WP_012807506.1_3212	0.412374	0.562938	0.398287
lcl|NC_013201.1_cds_WP_012807507.1_3213	0.381685	0.457489	0.41024
lcl|NC_013201.1_cds_WP_012807508.1_3214	0.435588	0.438194	0.396118
lcl|NC_013201.1_cds_WP_012807509.1_3215	0.418836	0.539313	0.409706
lcl|NC_013201.1_cds_WP_012807510.1_3216	0.364781	0.472455	0.394546
lcl|NC_013201.1_cds_WP_012807511.1_3217	0.346192	0.306624	0.377243
lcl|NC_013201.1_cds_WP_012807512.1_3219	0.385298	0.609238	0.383147
lcl|NC_013201.1_cds_WP_012807513.1_3220	0.374041	0.383336	0.393623
lcl|NC_013201.1_cds_WP_012807514.1_3222	0.435101	0.642028	0.400496
lcl|NC_013201.1_cds_WP_012807515.1_3223	0.449012	0.655556	0.412894
lcl|NC_013201.1_cds_WP_012807516.1_3224	0.356158	0.399306	0.38329
lcl|NC_013201.1_cds_WP_012807517.1_3226	0.344964	0.358076	0.387034
lcl|NC_013201.1_cds_WP_012807518.1_3227	0.420348	0.570319	0.385001
lcl|NC_013201.1_cds_WP_012807520.1_3229	0.385701	0.359534	0.401406
lcl|NC_013201.1_cds_WP_012807521.1_3230	0.351858	0.267194	0.392218
lcl|NC_013201.1_cds_WP_012807523.1_3231	0.34348	0.263848	0.391122
lcl|NC_013201.1_cds_WP_012807524.1_3232	0.308508	0.171601	0.390487
lcl|NC_013201.1_cds_WP_012807525.1_3233	0.356248	0.327629	0.397888
lcl|NC_013201.1_cds_WP_012807527.1_3235	0.416345	0.525208	0.403047
lcl|NC_013201.1_cds_WP_012807528.1_3236	0.412393	0.556194	0.393337
lcl|NC_013201.1_cds_WP_012807529.1_3237	0.408515	0.511326	0.385283
lcl|NC_013201.1_cds_WP_012807530.1_3238	0.308629	0.343516	0.388074
lcl|NC_013201.1_cds_WP_012807532.1_3240	0.430493	0.607796	0.405981
lcl|NC_013201.1_cds_WP_012807534.1_3241	0.43354	0.598526	0.396107
lcl|NC_013201.1_cds_WP_012807535.1_3242	0.42193	0.609808	0.402464
lcl|NC_013201.1_cds_WP_012807536.1_3243	0.416579	0.593615	0.404942
lcl|NC_013201.1_cds_WP_012807537.1_3244	0.436102	0.495207	0.414272
lcl|NC_013201.1_cds_WP_012807539.1_3246	0.399253	0.5022	0.394779
lcl|NC_013201.1_cds_WP_012807540.1_3247	0.433684	0.58027	0.394606
lcl|NC_013201.1_cds_WP_012807541.1_3248	0.434008	0.67742	0.405276
lcl|NC_013201.1_cds_WP_012807542.1_3250	0.421389	0.647513	0.404114
lcl|NC_013201.1_cds_WP_012807544.1_3251	0.445231	0.682866	0.403813
lcl|NC_013201.1_cds_WP_015764167.1_3252	0.425144	0.624505	0.399585
lcl|NC_013201.1_cds_WP_015764168.1_3253	0.46722	0.779996	0.431241
lcl|NC_013201.1_cds_WP_015764169.1_3254	0.442686	0.649724	0.425805
lcl|NC_013201.1_cds_WP_015764170.1_3255	0.449435	0.747457	0.415267
lcl|NC_013201.1_cds_WP_015764173.1_3258	0.421676	0.587343	0.390562
lcl|NC_013201.1_cds_WP_015764175.1_3260	0.430248	0.723955	0.400101
lcl|NC_013201.1_cds_WP_015764176.1_3261	0.452392	0.691108	0.412724
lcl|NC_013201.1_cds_WP_015764177.1_3262	0.462519	0.714962	0.417384
lcl|NC_013201.1_cds_WP_015764178.1_3263	0.4429	0.784014	0.407708
lcl|NC_013201.1_cds_WP_015764179.1_3264	0.456807	0.731964	0.418132
lcl|NC_013201.1_cds_WP_015764180.1_3265	0.444781	0.647622	0.390164
lcl|NC_013201.1_cds_WP_015764181.1_3266	0.435318	0.662778	0.395875
lcl|NC_013201.1_cds_WP_015764182.1_3267	0.455566	0.700567	0.404323
lcl|NC_013201.1_cds_WP_015764183.1_3268	0.438916	0.615399	0.394228
lcl|NC_013201.1_cds_WP_015764184.1_3269	0.429043	0.594902	0.394921
lcl|NC_013201.1_cds_WP_015764185.1_3270	0.438847	0.615747	0.400669
lcl|NC_013201.1_cds_WP_015764186.1_3271	0.430822	0.558211	0.398495
lcl|NC_013201.1_cds_WP_015764188.1_3273	0.415662	0.661802	0.382963
lcl|NC_013201.1_cds_WP_015764189.1_3274	0.407172	0.573354	0.392261
lcl|NC_013201.1_cds_WP_015764190.1_3275	0.417031	0.678961	0.387213
lcl|NC_013201.1_cds_WP_015764191.1_3276	0.425595	0.660209	0.397936
lcl|NC_013201.1_cds_WP_015764192.1_3277	0.4314	0.712667	0.411696
lcl|NC_013201.1_cds_WP_015764193.1_3278	0.438522	0.662222	0.397791
lcl|NC_013201.1_cds_WP_015764194.1_3279	0.444251	0.720251	0.403103
lcl|NC_013201.1_cds_WP_015764195.1_3280	0.43688	0.656915	0.402384
lcl|NC_013201.1_cds_WP_015764196.1_3281	0.433389	0.692361	0.398755
lcl|NC_013201.1_cds_WP_015764197.1_3282	0.445382	0.620367	0.401661
lcl|NC_013201.1_cds_WP_015764198.1_3283	0.429554	0.615156	0.388447
lcl|NC_013201.1_cds_WP_015764199.1_3284	0.442608	0.692404	0.405849
lcl|NC_013201.1_cds_WP_018258919.1_3259	0.441164	0.598053	0.416
lcl|NC_013201.1_cds_WP_049940908.1_3128	0.3625	0.315278	0.402568
lcl|NC_013201.1_cds_WP_049940917.1_3234	0.383182	0.393144	0.411423
lcl|NC_013201.1_cds_WP_049940918.1_3256	0.44387	0.646889	0.39998
lcl|NC_013201.1_cds_WP_049940920.1_3239	0.425383	0.616859	0.38008
lcl|NC_013201.1_cds_WP_049940922.1_3245	0.429733	0.618091	0.410953
lcl|NC_013201.1_cds_WP_049940923.1_3257	0.415697	0.629012	0.392889
lcl|NC_013201.1_cds_WP_049940925.1_3272	0.407207	0.613139	0.39018
lcl|NC_013201.1_cds_WP_079979674.1_3218	0.336983	0.256667	0.388605
lcl|NC_013201.1_cds_WP_079979675.1_3249	0.409313	0.545893	0.401942
lcl|NC_013202.1_cds_1002	0.353888	0.380295	0.358365
lcl|NC_013202.1_cds_1099	0.406774	0.47435	0.387043
lcl|NC_013202.1_cds_1152	0.33388	0.255577	0.383896
lcl|NC_013202.1_cds_1161	0.38801	0.427321	0.404223
lcl|NC_013202.1_cds_1163	0.338827	0.291812	0.371655
lcl|NC_013202.1_cds_1196	0.367278	0.401469	0.381113
lcl|NC_013202.1_cds_1197	0.367879	0.398417	0.386098
lcl|NC_013202.1_cds_139	0.425073	0.440402	0.386248
lcl|NC_013202.1_cds_1390	0.378818	0.399455	0.39079
lcl|NC_013202.1_cds_140	0.392276	0.538339	0.394888
lcl|NC_013202.1_cds_1405	0.377351	0.315486	0.39049
lcl|NC_013202.1_cds_1408	0.377857	0.397452	0.390306
lcl|NC_013202.1_cds_1419	0.409362	0.41093	0.394616
lcl|NC_013202.1_cds_1438	0.400702	0.319677	0.381549
lcl|NC_013202.1_cds_1440	0.480117	0.748666	0.453111
lcl|NC_013202.1_cds_1441	0.415711	0.607976	0.427524
lcl|NC_013202.1_cds_1442	0.411627	0.505498	0.40325
lcl|NC_013202.1_cds_1502	0.378957	0.327964	0.378937
lcl|NC_013202.1_cds_1626	0.39637	0.466825	0.397031
lcl|NC_013202.1_cds_1630	0.361357	0.297389	0.385712
lcl|NC_013202.1_cds_1815	0.313105	0.228143	0.395588
lcl|NC_013202.1_cds_1829	0.382694	0.33597	0.388037
lcl|NC_013202.1_cds_2043	0.35711	0.419617	0.378722
lcl|NC_013202.1_cds_2350	0.402261	0.603051	0.399611
lcl|NC_013202.1_cds_2352	0.421414	0.530546	0.391549
lcl|NC_013202.1_cds_2355	0.368177	0.41449	0.389474
lcl|NC_013202.1_cds_2460	0.399905	0.40462	0.393195
lcl|NC_013202.1_cds_2463	0.378658	0.400112	0.387725
lcl|NC_013202.1_cds_362	0.312041	0.219583	0.397166
lcl|NC_013202.1_cds_604	0.411021	0.428512	0.405742
lcl|NC_013202.1_cds_61	0.333151	0.317589	0.383373
lcl|NC_013202.1_cds_62	0.374433	0.382064	0.381524
lcl|NC_013202.1_cds_66	0.33391	0.262164	0.380505
lcl|NC_013202.1_cds_68	0.354865	0.305469	0.395733
lcl|NC_013202.1_cds_732	0.446848	0.673149	0.404772
lcl|NC_013202.1_cds_77	0.412783	0.475047	0.397611
lcl|NC_013202.1_cds_791	0.400171	0.351548	0.389776
lcl|NC_013202.1_cds_823	0.468376	0.718408	0.423463
lcl|NC_013202.1_cds_970	0.408792	0.398109	0.387135
lcl|NC_013202.1_cds_981	0.410215	0.596141	0.377192
lcl|NC_013202.1_cds_WP_007540613.1_540	0.341731	0.363351	0.387166
lcl|NC_013202.1_cds_WP_012807489.1_1412	0.364619	0.431306	0.37952
lcl|NC_013202.1_cds_WP_012807489.1_1637	0.364619	0.431306	0.37952
lcl|NC_013202.1_cds_WP_012807489.1_828	0.364619	0.431306	0.37952
lcl|NC_013202.1_cds_WP_012807545.1_1	0.438998	0.684185	0.400357
lcl|NC_013202.1_cds_WP_012807546.1_2	0.445844	0.762882	0.423132
lcl|NC_013202.1_cds_WP_012807548.1_4	0.440034	0.60811	0.392902
lcl|NC_013202.1_cds_WP_012807549.1_5	0.451147	0.687133	0.43221
lcl|NC_013202.1_cds_WP_012807550.1_6	0.441875	0.569258	0.401316
lcl|NC_013202.1_cds_WP_012807551.1_7	0.450989	0.655305	0.440776
lcl|NC_013202.1_cds_WP_012807552.1_8	0.448718	0.67171	0.419445
lcl|NC_013202.1_cds_WP_012807553.1_9	0.438338	0.758752	0.40447
lcl|NC_013202.1_cds_WP_012807554.1_10	0.434185	0.670135	0.416165
lcl|NC_013202.1_cds_WP_012807555.1_11	0.426333	0.659888	0.400392
lcl|NC_013202.1_cds_WP_012807556.1_12	0.396066	0.647665	0.391617
lcl|NC_013202.1_cds_WP_012807557.1_13	0.384527	0.703315	0.385209
lcl|NC_013202.1_cds_WP_012807559.1_15	0.437137	0.669889	0.404805
lcl|NC_013202.1_cds_WP_012807560.1_16	0.411867	0.637329	0.383576
lcl|NC_013202.1_cds_WP_012807561.1_17	0.436103	0.699416	0.393591
lcl|NC_013202.1_cds_WP_012807562.1_18	0.435237	0.762942	0.414559
lcl|NC_013202.1_cds_WP_012807563.1_19	0.436462	0.701853	0.407735
lcl|NC_013202.1_cds_WP_012807564.1_20	0.447932	0.682914	0.408172
lcl|NC_013202.1_cds_WP_012807565.1_21	0.458104	0.716168	0.40123
lcl|NC_013202.1_cds_WP_012807566.1_22	0.456579	0.692907	0.402966
lcl|NC_013202.1_cds_WP_012807567.1_23	0.424317	0.633656	0.390524
lcl|NC_013202.1_cds_WP_012807568.1_24	0.428348	0.670405	0.385553
lcl|NC_013202.1_cds_WP_012807570.1_26	0.452859	0.618907	0.413327
lcl|NC_013202.1_cds_WP_012807571.1_27	0.426667	0.697593	0.394731
lcl|NC_013202.1_cds_WP_012807572.1_28	0.412825	0.555945	0.390364
lcl|NC_013202.1_cds_WP_012807573.1_29	0.440298	0.755216	0.418144
lcl|NC_013202.1_cds_WP_012807574.1_30	0.436432	0.659773	0.402224
lcl|NC_013202.1_cds_WP_012807575.1_31	0.427455	0.662672	0.389338
lcl|NC_013202.1_cds_WP_012807576.1_32	0.457174	0.680522	0.405983
lcl|NC_013202.1_cds_WP_012807577.1_33	0.429715	0.641563	0.394332
lcl|NC_013202.1_cds_WP_012807578.1_34	0.457841	0.685015	0.404111
lcl|NC_013202.1_cds_WP_012807579.1_35	0.423106	0.639436	0.395975
lcl|NC_013202.1_cds_WP_012807580.1_36	0.434651	0.634489	0.399727
lcl|NC_013202.1_cds_WP_012807581.1_37	0.43431	0.659372	0.398148
lcl|NC_013202.1_cds_WP_012807582.1_38	0.438419	0.6724	0.394498
lcl|NC_013202.1_cds_WP_012807585.1_40	0.438196	0.687846	0.406188
lcl|NC_013202.1_cds_WP_012807587.1_41	0.460081	0.656931	0.410705
lcl|NC_013202.1_cds_WP_012807589.1_43	0.435915	0.607805	0.404367
lcl|NC_013202.1_cds_WP_012807591.1_45	0.457951	0.7099	0.42153
lcl|NC_013202.1_cds_WP_012807592.1_46	0.448927	0.700476	0.412656
lcl|NC_013202.1_cds_WP_012807593.1_47	0.439697	0.68093	0.398023
lcl|NC_013202.1_cds_WP_012807594.1_48	0.452768	0.743187	0.417129
lcl|NC_013202.1_cds_WP_012807595.1_49	0.438291	0.733778	0.407273
lcl|NC_013202.1_cds_WP_012807596.1_50	0.44706	0.698409	0.420602
lcl|NC_013202.1_cds_WP_012807597.1_51	0.445149	0.549679	0.415962
lcl|NC_013202.1_cds_WP_012807598.1_52	0.421422	0.562199	0.41107
lcl|NC_013202.1_cds_WP_012807599.1_53	0.424628	0.503421	0.424925
lcl|NC_013202.1_cds_WP_012807600.1_54	0.41936	0.581026	0.398716
lcl|NC_013202.1_cds_WP_012807601.1_55	0.335798	0.357941	0.366745
lcl|NC_013202.1_cds_WP_012807603.1_57	0.329984	0.285528	0.391414
lcl|NC_013202.1_cds_WP_012807604.1_58	0.422346	0.616902	0.389737
lcl|NC_013202.1_cds_WP_012807605.1_59	0.439364	0.59915	0.393557
lcl|NC_013202.1_cds_WP_012807606.1_60	0.427836	0.62723	0.397298
lcl|NC_013202.1_cds_WP_012807608.1_63	0.338187	0.308318	0.377636
lcl|NC_013202.1_cds_WP_012807609.1_64	0.293729	0.125139	0.385233
lcl|NC_013202.1_cds_WP_012807610.1_65	0.287374	0.129916	0.388225
lcl|NC_013202.1_cds_WP_012807612.1_69	0.355601	0.37412	0.408835
lcl|NC_013202.1_cds_WP_012807613.1_70	0.310521	0.155754	0.391522
lcl|NC_013202.1_cds_WP_012807615.1_71	0.377033	0.360425	0.387677
lcl|NC_013202.1_cds_WP_012807617.1_73	0.320363	0.235633	0.382277
lcl|NC_013202.1_cds_WP_012807618.1_74	0.330765	0.231025	0.392375
lcl|NC_013202.1_cds_WP_012807619.1_75	0.34928	0.267854	0.389641
lcl|NC_013202.1_cds_WP_012807620.1_76	0.36773	0.351501	0.402887
lcl|NC_013202.1_cds_WP_012807621.1_78	0.395832	0.553124	0.403882
lcl|NC_013202.1_cds_WP_012807622.1_79	0.429255	0.648442	0.399897
lcl|NC_013202.1_cds_WP_012807624.1_80	0.441548	0.648316	0.396672
lcl|NC_013202.1_cds_WP_012807625.1_81	0.418134	0.607642	0.397011
lcl|NC_013202.1_cds_WP_012807626.1_82	0.43443	0.607015	0.402484
lcl|NC_013202.1_cds_WP_012807628.1_84	0.429834	0.639454	0.392836
lcl|NC_013202.1_cds_WP_012807629.1_85	0.416858	0.571963	0.38865
lcl|NC_013202.1_cds_WP_012807630.1_86	0.411025	0.582466	0.387753
lcl|NC_013202.1_cds_WP_012807631.1_87	0.438312	0.700595	0.40402
lcl|NC_013202.1_cds_WP_012807632.1_88	0.450491	0.651118	0.407249
lcl|NC_013202.1_cds_WP_012807633.1_89	0.432348	0.617436	0.400581
lcl|NC_013202.1_cds_WP_012807634.1_90	0.452996	0.749206	0.417935
lcl|NC_013202.1_cds_WP_012807635.1_91	0.419322	0.670984	0.392268
lcl|NC_013202.1_cds_WP_012807636.1_92	0.449159	0.738045	0.40727
lcl|NC_013202.1_cds_WP_012807637.1_94	0.401591	0.540786	0.380633
lcl|NC_013202.1_cds_WP_012807638.1_95	0.421945	0.666133	0.387017
lcl|NC_013202.1_cds_WP_012807639.1_96	0.443821	0.694022	0.393385
lcl|NC_013202.1_cds_WP_012807640.1_97	0.441809	0.65411	0.3938
lcl|NC_013202.1_cds_WP_012807641.1_98	0.435477	0.670357	0.396011
lcl|NC_013202.1_cds_WP_012807642.1_99	0.439534	0.704893	0.40008
lcl|NC_013202.1_cds_WP_012807643.1_100	0.436255	0.689753	0.400266
lcl|NC_013202.1_cds_WP_012807644.1_101	0.452355	0.741692	0.403442
lcl|NC_013202.1_cds_WP_012807645.1_102	0.447621	0.679046	0.40928
lcl|NC_013202.1_cds_WP_012807646.1_103	0.443616	0.642835	0.403086
lcl|NC_013202.1_cds_WP_012807647.1_104	0.4399	0.747522	0.411782
lcl|NC_013202.1_cds_WP_012807648.1_105	0.454256	0.676442	0.410914
lcl|NC_013202.1_cds_WP_012807649.1_106	0.447601	0.735545	0.403207
lcl|NC_013202.1_cds_WP_012807650.1_107	0.442604	0.727806	0.400904
lcl|NC_013202.1_cds_WP_012807651.1_108	0.443711	0.701357	0.396867
lcl|NC_013202.1_cds_WP_012807652.1_109	0.448591	0.6211	0.402362
lcl|NC_013202.1_cds_WP_012807653.1_110	0.449089	0.801828	0.410393
lcl|NC_013202.1_cds_WP_012807654.1_111	0.434589	0.748645	0.408096
lcl|NC_013202.1_cds_WP_012807655.1_112	0.441703	0.665059	0.403853
lcl|NC_013202.1_cds_WP_012807657.1_114	0.447899	0.685863	0.400089
lcl|NC_013202.1_cds_WP_012807658.1_115	0.415229	0.598321	0.384961
lcl|NC_013202.1_cds_WP_012807659.1_116	0.441152	0.645575	0.394347
lcl|NC_013202.1_cds_WP_012807660.1_117	0.412898	0.545322	0.385988
lcl|NC_013202.1_cds_WP_012807661.1_118	0.446279	0.588488	0.395412
lcl|NC_013202.1_cds_WP_012807662.1_119	0.441223	0.585057	0.389256
lcl|NC_013202.1_cds_WP_012807663.1_120	0.40492	0.605782	0.396881
lcl|NC_013202.1_cds_WP_012807664.1_121	0.42421	0.563312	0.385965
lcl|NC_013202.1_cds_WP_012807665.1_122	0.446334	0.562476	0.411602
lcl|NC_013202.1_cds_WP_012807666.1_123	0.420414	0.577391	0.403531
lcl|NC_013202.1_cds_WP_012807667.1_124	0.403327	0.533401	0.39795
lcl|NC_013202.1_cds_WP_012807668.1_125	0.443684	0.556986	0.411518
lcl|NC_013202.1_cds_WP_012807669.1_126	0.439041	0.5716	0.428745
lcl|NC_013202.1_cds_WP_012807670.1_127	0.431973	0.675139	0.40108
lcl|NC_013202.1_cds_WP_012807671.1_128	0.408131	0.622213	0.39198
lcl|NC_013202.1_cds_WP_012807674.1_131	0.422933	0.649547	0.386016
lcl|NC_013202.1_cds_WP_012807675.1_132	0.419738	0.579697	0.393638
lcl|NC_013202.1_cds_WP_012807676.1_133	0.431547	0.671697	0.396868
lcl|NC_013202.1_cds_WP_012807677.1_134	0.429137	0.728032	0.404891
lcl|NC_013202.1_cds_WP_012807679.1_135	0.4406	0.706928	0.403165
lcl|NC_013202.1_cds_WP_012807680.1_136	0.433562	0.65187	0.399285
lcl|NC_013202.1_cds_WP_012807681.1_137	0.434889	0.669335	0.400949
lcl|NC_013202.1_cds_WP_012807682.1_138	0.409201	0.58033	0.392111
lcl|NC_013202.1_cds_WP_012807686.1_141	0.394221	0.491078	0.396185
lcl|NC_013202.1_cds_WP_012807687.1_142	0.371524	0.529935	0.397109
lcl|NC_013202.1_cds_WP_012807689.1_143	0.380746	0.464292	0.380595
lcl|NC_013202.1_cds_WP_012807690.1_144	0.422088	0.535411	0.428741
lcl|NC_013202.1_cds_WP_012807691.1_145	0.370878	0.371555	0.395898
lcl|NC_013202.1_cds_WP_012807693.1_148	0.377277	0.406809	0.37866
lcl|NC_013202.1_cds_WP_012807695.1_149	0.399034	0.601264	0.408094
lcl|NC_013202.1_cds_WP_012807696.1_150	0.417961	0.576825	0.416394
lcl|NC_013202.1_cds_WP_012807697.1_151	0.399772	0.564395	0.398093
lcl|NC_013202.1_cds_WP_012807698.1_152	0.42024	0.454791	0.398176
lcl|NC_013202.1_cds_WP_012807699.1_153	0.44154	0.739026	0.41209
lcl|NC_013202.1_cds_WP_012807700.1_154	0.421934	0.566065	0.403112
lcl|NC_013202.1_cds_WP_012807702.1_155	0.461138	0.693969	0.414749
lcl|NC_013202.1_cds_WP_012807703.1_156	0.457124	0.665927	0.413499
lcl|NC_013202.1_cds_WP_012807704.1_157	0.431328	0.54728	0.41043
lcl|NC_013202.1_cds_WP_012807705.1_158	0.433522	0.720081	0.41188
lcl|NC_013202.1_cds_WP_012807706.1_159	0.425643	0.637076	0.396503
lcl|NC_013202.1_cds_WP_012807707.1_160	0.395002	0.525733	0.388473
lcl|NC_013202.1_cds_WP_012807708.1_161	0.437454	0.653628	0.399279
lcl|NC_013202.1_cds_WP_012807709.1_162	0.422537	0.627741	0.393489
lcl|NC_013202.1_cds_WP_012807710.1_163	0.426546	0.657051	0.390866
lcl|NC_013202.1_cds_WP_012807711.1_164	0.43624	0.626179	0.393949
lcl|NC_013202.1_cds_WP_012807712.1_165	0.4331	0.649005	0.394429
lcl|NC_013202.1_cds_WP_012807713.1_166	0.412494	0.553538	0.398017
lcl|NC_013202.1_cds_WP_012807714.1_167	0.432323	0.661805	0.389281
lcl|NC_013202.1_cds_WP_012807715.1_168	0.419159	0.738275	0.398912
lcl|NC_013202.1_cds_WP_012807716.1_169	0.462263	0.683046	0.409199
lcl|NC_013202.1_cds_WP_012807717.1_170	0.433211	0.661246	0.413665
lcl|NC_013202.1_cds_WP_012807718.1_171	0.43718	0.661836	0.401426
lcl|NC_013202.1_cds_WP_012807719.1_172	0.439806	0.51296	0.394835
lcl|NC_013202.1_cds_WP_012807720.1_173	0.424243	0.666135	0.405397
lcl|NC_013202.1_cds_WP_012807721.1_174	0.449821	0.788612	0.404212
lcl|NC_013202.1_cds_WP_012807722.1_175	0.409664	0.66846	0.38076
lcl|NC_013202.1_cds_WP_012807723.1_176	0.43665	0.591817	0.402617
lcl|NC_013202.1_cds_WP_012807724.1_177	0.426867	0.517137	0.396441
lcl|NC_013202.1_cds_WP_012807725.1_178	0.413977	0.575288	0.396435
lcl|NC_013202.1_cds_WP_012807726.1_179	0.45523	0.711156	0.409129
lcl|NC_013202.1_cds_WP_012807727.1_180	0.437267	0.704616	0.404735
lcl|NC_013202.1_cds_WP_012807728.1_181	0.421592	0.628767	0.394288
lcl|NC_013202.1_cds_WP_012807729.1_182	0.447924	0.693362	0.41167
lcl|NC_013202.1_cds_WP_012807730.1_183	0.434381	0.694579	0.408784
lcl|NC_013202.1_cds_WP_012807731.1_184	0.430538	0.695625	0.401764
lcl|NC_013202.1_cds_WP_012807732.1_185	0.440741	0.740223	0.409821
lcl|NC_013202.1_cds_WP_012807733.1_186	0.430652	0.622516	0.403958
lcl|NC_013202.1_cds_WP_012807734.1_187	0.439617	0.582094	0.402021
lcl|NC_013202.1_cds_WP_012807735.1_188	0.411646	0.526424	0.395043
lcl|NC_013202.1_cds_WP_012807737.1_190	0.412713	0.553209	0.400632
lcl|NC_013202.1_cds_WP_012807738.1_191	0.401351	0.486513	0.39786
lcl|NC_013202.1_cds_WP_012807739.1_192	0.398786	0.513586	0.399172
lcl|NC_013202.1_cds_WP_012807740.1_193	0.415929	0.566105	0.405566
lcl|NC_013202.1_cds_WP_012807741.1_194	0.398632	0.635586	0.388011
lcl|NC_013202.1_cds_WP_012807742.1_195	0.446134	0.692149	0.406216
lcl|NC_013202.1_cds_WP_012807743.1_196	0.408919	0.488146	0.385346
lcl|NC_013202.1_cds_WP_012807744.1_197	0.419909	0.613454	0.387468
lcl|NC_013202.1_cds_WP_012807745.1_198	0.435728	0.629481	0.398411
lcl|NC_013202.1_cds_WP_012807746.1_199	0.419624	0.578376	0.396071
lcl|NC_013202.1_cds_WP_012807747.1_200	0.434337	0.706759	0.409508
lcl|NC_013202.1_cds_WP_012807748.1_201	0.434147	0.644411	0.40007
lcl|NC_013202.1_cds_WP_012807749.1_202	0.426145	0.620748	0.402205
lcl|NC_013202.1_cds_WP_012807750.1_203	0.453511	0.713864	0.422857
lcl|NC_013202.1_cds_WP_012807751.1_204	0.422111	0.648719	0.382218
lcl|NC_013202.1_cds_WP_012807752.1_205	0.437544	0.67698	0.39409
lcl|NC_013202.1_cds_WP_012807753.1_206	0.432939	0.714809	0.402
lcl|NC_013202.1_cds_WP_012807754.1_207	0.43468	0.758332	0.396157
lcl|NC_013202.1_cds_WP_012807755.1_208	0.436916	0.752574	0.413108
lcl|NC_013202.1_cds_WP_012807756.1_209	0.390463	0.47151	0.397551
lcl|NC_013202.1_cds_WP_012807757.1_210	0.44438	0.78779	0.416022
lcl|NC_013202.1_cds_WP_012807759.1_211	0.451674	0.7381	0.413082
lcl|NC_013202.1_cds_WP_012807760.1_212	0.440941	0.714633	0.408531
lcl|NC_013202.1_cds_WP_012807761.1_213	0.446587	0.672085	0.409981
lcl|NC_013202.1_cds_WP_012807762.1_214	0.407627	0.594845	0.399551
lcl|NC_013202.1_cds_WP_012807763.1_215	0.461678	0.682614	0.422688
lcl|NC_013202.1_cds_WP_012807764.1_216	0.442252	0.668656	0.431799
lcl|NC_013202.1_cds_WP_012807765.1_217	0.432057	0.620894	0.4123
lcl|NC_013202.1_cds_WP_012807766.1_218	0.460941	0.725345	0.421399
lcl|NC_013202.1_cds_WP_012807767.1_219	0.439034	0.603788	0.421056
lcl|NC_013202.1_cds_WP_012807768.1_220	0.396681	0.598173	0.380228
lcl|NC_013202.1_cds_WP_012807769.1_221	0.399158	0.627976	0.375935
lcl|NC_013202.1_cds_WP_012807770.1_222	0.454037	0.701034	0.421015
lcl|NC_013202.1_cds_WP_012807771.1_223	0.382954	0.435345	0.412426
lcl|NC_013202.1_cds_WP_012807772.1_224	0.370613	0.387979	0.407353
lcl|NC_013202.1_cds_WP_012807773.1_225	0.371694	0.401783	0.403841
lcl|NC_013202.1_cds_WP_012807774.1_226	0.420856	0.588744	0.407058
lcl|NC_013202.1_cds_WP_012807775.1_227	0.415049	0.591474	0.400478
lcl|NC_013202.1_cds_WP_012807776.1_228	0.435964	0.651938	0.413182
lcl|NC_013202.1_cds_WP_012807777.1_229	0.430034	0.661314	0.398311
lcl|NC_013202.1_cds_WP_012807778.1_230	0.444501	0.627014	0.410481
lcl|NC_013202.1_cds_WP_012807779.1_231	0.461684	0.703843	0.420342
lcl|NC_013202.1_cds_WP_012807780.1_232	0.442836	0.700022	0.405346
lcl|NC_013202.1_cds_WP_012807781.1_233	0.448362	0.678276	0.392213
lcl|NC_013202.1_cds_WP_012807782.1_234	0.439985	0.694198	0.397892
lcl|NC_013202.1_cds_WP_012807783.1_235	0.461731	0.660925	0.426046
lcl|NC_013202.1_cds_WP_012807784.1_236	0.431052	0.663617	0.405085
lcl|NC_013202.1_cds_WP_012807785.1_237	0.433811	0.719523	0.412671
lcl|NC_013202.1_cds_WP_012807786.1_238	0.440617	0.709101	0.407222
lcl|NC_013202.1_cds_WP_012807787.1_239	0.452726	0.723895	0.412862
lcl|NC_013202.1_cds_WP_012807789.1_241	0.454983	0.706139	0.410272
lcl|NC_013202.1_cds_WP_012807790.1_242	0.439157	0.670479	0.396552
lcl|NC_013202.1_cds_WP_012807792.1_244	0.429607	0.61869	0.38441
lcl|NC_013202.1_cds_WP_012807793.1_245	0.436011	0.726838	0.404274
lcl|NC_013202.1_cds_WP_012807794.1_246	0.434004	0.7506	0.392284
lcl|NC_013202.1_cds_WP_012807795.1_247	0.458361	0.646216	0.410709
lcl|NC_013202.1_cds_WP_012807796.1_248	0.434618	0.747223	0.398217
lcl|NC_013202.1_cds_WP_012807797.1_249	0.391018	0.54568	0.394694
lcl|NC_013202.1_cds_WP_012807798.1_250	0.404011	0.471722	0.411208
lcl|NC_013202.1_cds_WP_012807799.1_251	0.424975	0.680487	0.395794
lcl|NC_013202.1_cds_WP_012807800.1_252	0.396025	0.749494	0.377774
lcl|NC_013202.1_cds_WP_012807801.1_253	0.418603	0.690462	0.371596
lcl|NC_013202.1_cds_WP_012807802.1_254	0.463288	0.757513	0.420503
lcl|NC_013202.1_cds_WP_012807803.1_255	0.461492	0.574858	0.42494
lcl|NC_013202.1_cds_WP_012807804.1_256	0.378454	0.446174	0.387201
lcl|NC_013202.1_cds_WP_012807806.1_257	0.439479	0.659197	0.398592
lcl|NC_013202.1_cds_WP_012807807.1_258	0.418708	0.718867	0.39857
lcl|NC_013202.1_cds_WP_012807808.1_259	0.4418	0.698718	0.396278
lcl|NC_013202.1_cds_WP_012807809.1_260	0.437158	0.677375	0.402381
lcl|NC_013202.1_cds_WP_012807810.1_261	0.446416	0.710236	0.404469
lcl|NC_013202.1_cds_WP_012807811.1_263	0.445414	0.711747	0.413189
lcl|NC_013202.1_cds_WP_012807812.1_264	0.441088	0.662933	0.4046
lcl|NC_013202.1_cds_WP_012807815.1_265	0.448891	0.626551	0.401577
lcl|NC_013202.1_cds_WP_012807816.1_266	0.433943	0.690273	0.389846
lcl|NC_013202.1_cds_WP_012807817.1_267	0.429874	0.708878	0.403318
lcl|NC_013202.1_cds_WP_012807818.1_268	0.438728	0.641443	0.397481
lcl|NC_013202.1_cds_WP_012807820.1_269	0.427692	0.678268	0.39652
lcl|NC_013202.1_cds_WP_012807822.1_270	0.431199	0.744806	0.397401
lcl|NC_013202.1_cds_WP_012807823.1_271	0.378385	0.49983	0.394583
lcl|NC_013202.1_cds_WP_012807824.1_272	0.443978	0.7695	0.414611
lcl|NC_013202.1_cds_WP_012807826.1_274	0.433964	0.647271	0.385549
lcl|NC_013202.1_cds_WP_012807827.1_275	0.428054	0.636107	0.391872
lcl|NC_013202.1_cds_WP_012807828.1_276	0.396387	0.682798	0.390525
lcl|NC_013202.1_cds_WP_012807829.1_277	0.444161	0.743854	0.415825
lcl|NC_013202.1_cds_WP_012807830.1_278	0.400086	0.617986	0.374379
lcl|NC_013202.1_cds_WP_012807831.1_279	0.447581	0.74789	0.405378
lcl|NC_013202.1_cds_WP_012807832.1_280	0.433988	0.645357	0.393293
lcl|NC_013202.1_cds_WP_012807833.1_281	0.426228	0.720773	0.399958
lcl|NC_013202.1_cds_WP_012807834.1_282	0.442298	0.664928	0.398731
lcl|NC_013202.1_cds_WP_012807835.1_283	0.444061	0.718875	0.400457
lcl|NC_013202.1_cds_WP_012807836.1_284	0.418147	0.65435	0.383597
lcl|NC_013202.1_cds_WP_012807837.1_285	0.417664	0.699891	0.377476
lcl|NC_013202.1_cds_WP_012807839.1_287	0.450603	0.78117	0.406853
lcl|NC_013202.1_cds_WP_012807840.1_288	0.421766	0.517727	0.405389
lcl|NC_013202.1_cds_WP_012807841.1_289	0.444629	0.658457	0.415992
lcl|NC_013202.1_cds_WP_012807842.1_290	0.437806	0.744378	0.406526
lcl|NC_013202.1_cds_WP_012807843.1_291	0.402984	0.540209	0.38587
lcl|NC_013202.1_cds_WP_012807844.1_292	0.423111	0.649667	0.411014
lcl|NC_013202.1_cds_WP_012807845.1_293	0.436559	0.644534	0.40308
lcl|NC_013202.1_cds_WP_012807846.1_294	0.427284	0.678225	0.408314
lcl|NC_013202.1_cds_WP_012807847.1_295	0.451653	0.814732	0.415759
lcl|NC_013202.1_cds_WP_012807848.1_296	0.449523	0.747005	0.407351
lcl|NC_013202.1_cds_WP_012807849.1_297	0.439538	0.57908	0.399018
lcl|NC_013202.1_cds_WP_012807850.1_299	0.450788	0.678731	0.407886
lcl|NC_013202.1_cds_WP_012807851.1_300	0.443034	0.723561	0.405487
lcl|NC_013202.1_cds_WP_012807852.1_301	0.445193	0.738348	0.398797
lcl|NC_013202.1_cds_WP_012807853.1_302	0.452677	0.669577	0.407124
lcl|NC_013202.1_cds_WP_012807854.1_303	0.436787	0.760544	0.3953
lcl|NC_013202.1_cds_WP_012807856.1_305	0.459981	0.745248	0.409747
lcl|NC_013202.1_cds_WP_012807857.1_306	0.446039	0.700505	0.401953
lcl|NC_013202.1_cds_WP_012807858.1_307	0.423528	0.657198	0.40378
lcl|NC_013202.1_cds_WP_012807859.1_308	0.462679	0.689809	0.415018
lcl|NC_013202.1_cds_WP_012807860.1_309	0.444708	0.631346	0.408639
lcl|NC_013202.1_cds_WP_012807861.1_310	0.453879	0.637331	0.406367
lcl|NC_013202.1_cds_WP_012807864.1_313	0.444608	0.609256	0.398076
lcl|NC_013202.1_cds_WP_012807865.1_314	0.440561	0.619856	0.400796
lcl|NC_013202.1_cds_WP_012807866.1_315	0.436735	0.637724	0.392346
lcl|NC_013202.1_cds_WP_012807867.1_316	0.439298	0.692157	0.390398
lcl|NC_013202.1_cds_WP_012807868.1_317	0.45411	0.641842	0.41056
lcl|NC_013202.1_cds_WP_012807869.1_318	0.383472	0.567807	0.407025
lcl|NC_013202.1_cds_WP_012807870.1_319	0.414672	0.523985	0.386538
lcl|NC_013202.1_cds_WP_012807871.1_320	0.427103	0.703803	0.393015
lcl|NC_013202.1_cds_WP_012807872.1_321	0.424353	0.701588	0.39676
lcl|NC_013202.1_cds_WP_012807874.1_323	0.43302	0.668029	0.402309
lcl|NC_013202.1_cds_WP_012807875.1_324	0.43482	0.647407	0.405565
lcl|NC_013202.1_cds_WP_012807876.1_325	0.460889	0.656321	0.405804
lcl|NC_013202.1_cds_WP_012807877.1_326	0.467847	0.706526	0.418411
lcl|NC_013202.1_cds_WP_012807878.1_327	0.41967	0.668386	0.375646
lcl|NC_013202.1_cds_WP_012807879.1_328	0.420292	0.641713	0.390968
lcl|NC_013202.1_cds_WP_012807880.1_329	0.458274	0.614116	0.412913
lcl|NC_013202.1_cds_WP_012807881.1_330	0.424568	0.659249	0.395767
lcl|NC_013202.1_cds_WP_012807882.1_331	0.455503	0.682847	0.41965
lcl|NC_013202.1_cds_WP_012807883.1_332	0.422194	0.669613	0.390574
lcl|NC_013202.1_cds_WP_012807884.1_333	0.425115	0.636713	0.405846
lcl|NC_013202.1_cds_WP_012807885.1_334	0.411662	0.532033	0.394558
lcl|NC_013202.1_cds_WP_012807886.1_335	0.426408	0.575659	0.40444
lcl|NC_013202.1_cds_WP_012807887.1_336	0.417222	0.683868	0.404355
lcl|NC_013202.1_cds_WP_012807888.1_337	0.45096	0.717624	0.407291
lcl|NC_013202.1_cds_WP_012807889.1_338	0.472562	0.689476	0.421063
lcl|NC_013202.1_cds_WP_012807890.1_340	0.341976	0.271117	0.391101
lcl|NC_013202.1_cds_WP_012807891.1_341	0.447042	0.736435	0.411926
lcl|NC_013202.1_cds_WP_012807892.1_342	0.459895	0.695139	0.437015
lcl|NC_013202.1_cds_WP_012807894.1_343	0.457845	0.716637	0.40861
lcl|NC_013202.1_cds_WP_012807895.1_344	0.452903	0.683017	0.404433
lcl|NC_013202.1_cds_WP_012807896.1_345	0.458613	0.720837	0.414808
lcl|NC_013202.1_cds_WP_012807897.1_346	0.443404	0.671786	0.390502
lcl|NC_013202.1_cds_WP_012807898.1_347	0.433349	0.655569	0.403304
lcl|NC_013202.1_cds_WP_012807899.1_348	0.416552	0.675542	0.383017
lcl|NC_013202.1_cds_WP_012807900.1_349	0.465756	0.722598	0.429841
lcl|NC_013202.1_cds_WP_012807901.1_350	0.489879	0.729575	0.41997
lcl|NC_013202.1_cds_WP_012807902.1_351	0.439882	0.688214	0.417351
lcl|NC_013202.1_cds_WP_012807903.1_352	0.434346	0.686843	0.398258
lcl|NC_013202.1_cds_WP_012807904.1_353	0.403492	0.699299	0.373164
lcl|NC_013202.1_cds_WP_012807905.1_354	0.427437	0.613808	0.389378
lcl|NC_013202.1_cds_WP_012807906.1_355	0.437363	0.670283	0.398045
lcl|NC_013202.1_cds_WP_012807907.1_356	0.456492	0.684198	0.407002
lcl|NC_013202.1_cds_WP_012807908.1_357	0.436376	0.721998	0.403037
lcl|NC_013202.1_cds_WP_012807909.1_358	0.452059	0.634987	0.399389
lcl|NC_013202.1_cds_WP_012807910.1_359	0.432563	0.567072	0.388452
lcl|NC_013202.1_cds_WP_012807911.1_360	0.450456	0.76483	0.406285
lcl|NC_013202.1_cds_WP_012807913.1_363	0.443942	0.698012	0.400852
lcl|NC_013202.1_cds_WP_012807914.1_364	0.419466	0.728797	0.400703
lcl|NC_013202.1_cds_WP_012807916.1_365	0.458496	0.710846	0.406818
lcl|NC_013202.1_cds_WP_012807918.1_366	0.439818	0.739664	0.404067
lcl|NC_013202.1_cds_WP_012807919.1_367	0.494867	0.808695	0.43208
lcl|NC_013202.1_cds_WP_012807920.1_368	0.415035	0.494715	0.390215
lcl|NC_013202.1_cds_WP_012807921.1_369	0.421945	0.680224	0.385738
lcl|NC_013202.1_cds_WP_012807922.1_370	0.445882	0.692764	0.412831
lcl|NC_013202.1_cds_WP_012807923.1_371	0.421537	0.622698	0.400133
lcl|NC_013202.1_cds_WP_012807924.1_372	0.444337	0.69016	0.413466
lcl|NC_013202.1_cds_WP_012807925.1_373	0.405244	0.545805	0.400904
lcl|NC_013202.1_cds_WP_012807926.1_374	0.42392	0.666886	0.407121
lcl|NC_013202.1_cds_WP_012807928.1_376	0.351608	0.284076	0.391451
lcl|NC_013202.1_cds_WP_012807929.1_377	0.449402	0.733192	0.409549
lcl|NC_013202.1_cds_WP_012807930.1_378	0.414785	0.687894	0.398906
lcl|NC_013202.1_cds_WP_012807931.1_379	0.442621	0.623376	0.401771
lcl|NC_013202.1_cds_WP_012807932.1_380	0.434513	0.604026	0.394742
lcl|NC_013202.1_cds_WP_012807933.1_381	0.462732	0.705537	0.41044
lcl|NC_013202.1_cds_WP_012807934.1_382	0.435986	0.707088	0.406854
lcl|NC_013202.1_cds_WP_012807935.1_383	0.436042	0.628793	0.395776
lcl|NC_013202.1_cds_WP_012807936.1_384	0.438533	0.746213	0.428429
lcl|NC_013202.1_cds_WP_012807937.1_385	0.441889	0.732935	0.408734
lcl|NC_013202.1_cds_WP_012807938.1_386	0.443414	0.614563	0.407865
lcl|NC_013202.1_cds_WP_012807941.1_389	0.432225	0.719611	0.409352
lcl|NC_013202.1_cds_WP_012807942.1_390	0.450696	0.712049	0.409751
lcl|NC_013202.1_cds_WP_012807943.1_391	0.35391	0.346434	0.391363
lcl|NC_013202.1_cds_WP_012807944.1_392	0.436515	0.703841	0.404101
lcl|NC_013202.1_cds_WP_012807945.1_393	0.402345	0.455486	0.40649
lcl|NC_013202.1_cds_WP_012807946.1_394	0.456836	0.701142	0.407865
lcl|NC_013202.1_cds_WP_012807948.1_395	0.405347	0.64721	0.383462
lcl|NC_013202.1_cds_WP_012807949.1_396	0.446386	0.605031	0.404591
lcl|NC_013202.1_cds_WP_012807950.1_397	0.46391	0.71228	0.40608
lcl|NC_013202.1_cds_WP_012807951.1_398	0.428767	0.663127	0.402484
lcl|NC_013202.1_cds_WP_012807952.1_399	0.41792	0.748757	0.394443
lcl|NC_013202.1_cds_WP_012807953.1_400	0.426294	0.750091	0.401095
lcl|NC_013202.1_cds_WP_012807954.1_401	0.452649	0.709293	0.414447
lcl|NC_013202.1_cds_WP_012807955.1_402	0.45764	0.441359	0.41026
lcl|NC_013202.1_cds_WP_012807956.1_403	0.438259	0.560312	0.406324
lcl|NC_013202.1_cds_WP_012807957.1_404	0.44474	0.64427	0.381269
lcl|NC_013202.1_cds_WP_012807958.1_405	0.42809	0.624812	0.400119
lcl|NC_013202.1_cds_WP_012807959.1_406	0.393233	0.645568	0.385142
lcl|NC_013202.1_cds_WP_012807961.1_407	0.397311	0.618394	0.406055
lcl|NC_013202.1_cds_WP_012807962.1_408	0.438305	0.801345	0.409549
lcl|NC_013202.1_cds_WP_012807963.1_409	0.399412	0.519107	0.392963
lcl|NC_013202.1_cds_WP_012807964.1_410	0.444509	0.64347	0.410856
lcl|NC_013202.1_cds_WP_012807965.1_411	0.389067	0.666512	0.39129
lcl|NC_013202.1_cds_WP_012807966.1_412	0.428915	0.677795	0.408521
lcl|NC_013202.1_cds_WP_012807967.1_413	0.441178	0.689899	0.417637
lcl|NC_013202.1_cds_WP_012807968.1_414	0.430818	0.49617	0.401453
lcl|NC_013202.1_cds_WP_012807969.1_415	0.414453	0.587779	0.393888
lcl|NC_013202.1_cds_WP_012807971.1_417	0.45863	0.501398	0.433802
lcl|NC_013202.1_cds_WP_012807973.1_418	0.399573	0.444201	0.393761
lcl|NC_013202.1_cds_WP_012807974.1_419	0.346974	0.276662	0.401987
lcl|NC_013202.1_cds_WP_012807975.1_420	0.338316	0.242315	0.386378
lcl|NC_013202.1_cds_WP_012807976.1_421	0.36366	0.312063	0.398814
lcl|NC_013202.1_cds_WP_012807977.1_422	0.35488	0.345383	0.386889
lcl|NC_013202.1_cds_WP_012807979.1_424	0.34663	0.303278	0.382966
lcl|NC_013202.1_cds_WP_012807980.1_425	0.427286	0.553306	0.40073
lcl|NC_013202.1_cds_WP_012807981.1_426	0.402701	0.497951	0.406322
lcl|NC_013202.1_cds_WP_012807982.1_427	0.438465	0.706623	0.399046
lcl|NC_013202.1_cds_WP_012807983.1_428	0.379477	0.596041	0.376364
lcl|NC_013202.1_cds_WP_012807984.1_429	0.402247	0.521638	0.412627
lcl|NC_013202.1_cds_WP_012807985.1_430	0.405575	0.555425	0.392733
lcl|NC_013202.1_cds_WP_012807986.1_431	0.423535	0.657677	0.402282
lcl|NC_013202.1_cds_WP_012807987.1_432	0.42487	0.594912	0.411525
lcl|NC_013202.1_cds_WP_012807988.1_433	0.354855	0.368091	0.38337
lcl|NC_013202.1_cds_WP_012807990.1_435	0.41471	0.586262	0.401395
lcl|NC_013202.1_cds_WP_012807992.1_437	0.362065	0.374905	0.386364
lcl|NC_013202.1_cds_WP_012807994.1_439	0.432873	0.610486	0.396264
lcl|NC_013202.1_cds_WP_012807995.1_440	0.45211	0.624128	0.412761
lcl|NC_013202.1_cds_WP_012807996.1_441	0.457845	0.704338	0.40932
lcl|NC_013202.1_cds_WP_012807997.1_442	0.407152	0.516887	0.393186
lcl|NC_013202.1_cds_WP_012807998.1_444	0.403952	0.432657	0.408359
lcl|NC_013202.1_cds_WP_012807999.1_445	0.502593	0.689015	0.445707
lcl|NC_013202.1_cds_WP_012808000.1_446	0.432228	0.534167	0.383109
lcl|NC_013202.1_cds_WP_012808001.1_1644	0.38929	0.477945	0.418299
lcl|NC_013202.1_cds_WP_012808001.1_447	0.38929	0.477945	0.418299
lcl|NC_013202.1_cds_WP_012808002.1_448	0.427139	0.499361	0.429837
lcl|NC_013202.1_cds_WP_012808003.1_449	0.412177	0.455902	0.402262
lcl|NC_013202.1_cds_WP_012808005.1_451	0.439606	0.572328	0.419362
lcl|NC_013202.1_cds_WP_012808006.1_452	0.418493	0.41449	0.414426
lcl|NC_013202.1_cds_WP_012808007.1_453	0.436389	0.580871	0.406594
lcl|NC_013202.1_cds_WP_012808008.1_454	0.447704	0.6554	0.417258
lcl|NC_013202.1_cds_WP_012808009.1_455	0.3882	0.58078	0.383057
lcl|NC_013202.1_cds_WP_012808012.1_457	0.468492	0.659049	0.432708
lcl|NC_013202.1_cds_WP_012808013.1_458	0.486734	0.653911	0.430767
lcl|NC_013202.1_cds_WP_012808014.1_459	0.488743	0.639751	0.447132
lcl|NC_013202.1_cds_WP_012808015.1_460	0.452673	0.555882	0.428123
lcl|NC_013202.1_cds_WP_012808016.1_461	0.43782	0.599253	0.402233
lcl|NC_013202.1_cds_WP_012808017.1_462	0.399012	0.504262	0.404128
lcl|NC_013202.1_cds_WP_012808018.1_463	0.350068	0.310936	0.392
lcl|NC_013202.1_cds_WP_012808020.1_464	0.420531	0.599056	0.391512
lcl|NC_013202.1_cds_WP_012808023.1_466	0.446769	0.706436	0.408843
lcl|NC_013202.1_cds_WP_012808024.1_467	0.421667	0.797479	0.404222
lcl|NC_013202.1_cds_WP_012808025.1_468	0.416077	0.708344	0.391427
lcl|NC_013202.1_cds_WP_012808026.1_469	0.426643	0.715282	0.394738
lcl|NC_013202.1_cds_WP_012808027.1_470	0.433022	0.636117	0.403586
lcl|NC_013202.1_cds_WP_012808028.1_471	0.443149	0.652136	0.40539
lcl|NC_013202.1_cds_WP_012808029.1_472	0.454714	0.703073	0.40163
lcl|NC_013202.1_cds_WP_012808030.1_473	0.437072	0.65175	0.408916
lcl|NC_013202.1_cds_WP_012808031.1_474	0.453734	0.776754	0.418931
lcl|NC_013202.1_cds_WP_012808032.1_475	0.42635	0.661047	0.400804
lcl|NC_013202.1_cds_WP_012808033.1_476	0.415207	0.556279	0.371821
lcl|NC_013202.1_cds_WP_012808034.1_477	0.422617	0.618201	0.39326
lcl|NC_013202.1_cds_WP_012808035.1_478	0.4244	0.566837	0.391836
lcl|NC_013202.1_cds_WP_012808036.1_479	0.4654	0.816491	0.412631
lcl|NC_013202.1_cds_WP_012808037.1_480	0.397779	0.673688	0.386976
lcl|NC_013202.1_cds_WP_012808038.1_481	0.438636	0.744554	0.403202
lcl|NC_013202.1_cds_WP_012808039.1_482	0.463025	0.751887	0.413317
lcl|NC_013202.1_cds_WP_012808040.1_483	0.441804	0.737051	0.413627
lcl|NC_013202.1_cds_WP_012808041.1_484	0.440631	0.712174	0.403106
lcl|NC_013202.1_cds_WP_012808042.1_485	0.435595	0.717627	0.402332
lcl|NC_013202.1_cds_WP_012808043.1_486	0.428704	0.531962	0.419332
lcl|NC_013202.1_cds_WP_012808044.1_487	0.471979	0.695712	0.405019
lcl|NC_013202.1_cds_WP_012808045.1_488	0.437321	0.629818	0.390169
lcl|NC_013202.1_cds_WP_012808046.1_489	0.403419	0.592519	0.385603
lcl|NC_013202.1_cds_WP_012808047.1_490	0.410672	0.69522	0.386854
lcl|NC_013202.1_cds_WP_012808048.1_491	0.468234	0.664989	0.421025
lcl|NC_013202.1_cds_WP_012808049.1_492	0.444269	0.637899	0.393707
lcl|NC_013202.1_cds_WP_012808050.1_493	0.446806	0.74441	0.403925
lcl|NC_013202.1_cds_WP_012808051.1_494	0.426497	0.601251	0.379887
lcl|NC_013202.1_cds_WP_012808052.1_495	0.415038	0.648768	0.387375
lcl|NC_013202.1_cds_WP_012808053.1_496	0.457363	0.787868	0.42205
lcl|NC_013202.1_cds_WP_012808054.1_497	0.449754	0.681661	0.406735
lcl|NC_013202.1_cds_WP_012808055.1_498	0.446603	0.724203	0.411064
lcl|NC_013202.1_cds_WP_012808056.1_499	0.430767	0.649816	0.402813
lcl|NC_013202.1_cds_WP_012808057.1_500	0.407507	0.716625	0.392556
lcl|NC_013202.1_cds_WP_012808058.1_501	0.424375	0.582757	0.396124
lcl|NC_013202.1_cds_WP_012808059.1_502	0.4171	0.659519	0.409109
lcl|NC_013202.1_cds_WP_012808060.1_503	0.435708	0.556515	0.407885
lcl|NC_013202.1_cds_WP_012808061.1_504	0.45914	0.759274	0.415195
lcl|NC_013202.1_cds_WP_012808062.1_505	0.443704	0.737897	0.410038
lcl|NC_013202.1_cds_WP_012808063.1_506	0.422084	0.594237	0.394151
lcl|NC_013202.1_cds_WP_012808065.1_508	0.446951	0.728268	0.411935
lcl|NC_013202.1_cds_WP_012808066.1_509	0.415469	0.584091	0.401947
lcl|NC_013202.1_cds_WP_012808067.1_510	0.425637	0.589334	0.402149
lcl|NC_013202.1_cds_WP_012808068.1_511	0.425581	0.679561	0.409842
lcl|NC_013202.1_cds_WP_012808069.1_512	0.438843	0.68729	0.404622
lcl|NC_013202.1_cds_WP_012808070.1_513	0.439481	0.671222	0.411017
lcl|NC_013202.1_cds_WP_012808071.1_514	0.431204	0.744378	0.390981
lcl|NC_013202.1_cds_WP_012808072.1_515	0.447049	0.46722	0.404979
lcl|NC_013202.1_cds_WP_012808073.1_516	0.427734	0.790866	0.401494
lcl|NC_013202.1_cds_WP_012808074.1_517	0.447961	0.557051	0.382059
lcl|NC_013202.1_cds_WP_012808075.1_518	0.454309	0.719802	0.412135
lcl|NC_013202.1_cds_WP_012808076.1_519	0.447609	0.627999	0.408735
lcl|NC_013202.1_cds_WP_012808077.1_520	0.36098	0.389176	0.399712
lcl|NC_013202.1_cds_WP_012808078.1_521	0.446632	0.728037	0.408283
lcl|NC_013202.1_cds_WP_012808079.1_522	0.426298	0.656932	0.391611
lcl|NC_013202.1_cds_WP_012808080.1_523	0.445673	0.756943	0.402549
lcl|NC_013202.1_cds_WP_012808081.1_524	0.446955	0.581624	0.410397
lcl|NC_013202.1_cds_WP_012808082.1_525	0.30141	0.170972	0.398193
lcl|NC_013202.1_cds_WP_012808083.1_527	0.452004	0.69248	0.416421
lcl|NC_013202.1_cds_WP_012808085.1_528	0.387052	0.504808	0.393632
lcl|NC_013202.1_cds_WP_012808086.1_529	0.448533	0.673404	0.414116
lcl|NC_013202.1_cds_WP_012808087.1_530	0.42374	0.555101	0.412343
lcl|NC_013202.1_cds_WP_012808088.1_531	0.386484	0.561597	0.417323
lcl|NC_013202.1_cds_WP_012808089.1_532	0.460792	0.635124	0.398651
lcl|NC_013202.1_cds_WP_012808090.1_533	0.419753	0.707701	0.407471
lcl|NC_013202.1_cds_WP_012808091.1_534	0.44364	0.656497	0.386208
lcl|NC_013202.1_cds_WP_012808092.1_535	0.453683	0.677531	0.424636
lcl|NC_013202.1_cds_WP_012808094.1_537	0.450209	0.718423	0.414912
lcl|NC_013202.1_cds_WP_012808095.1_538	0.442061	0.688562	0.388509
lcl|NC_013202.1_cds_WP_012808096.1_539	0.396238	0.491777	0.404188
lcl|NC_013202.1_cds_WP_012808097.1_541	0.37698	0.355218	0.390328
lcl|NC_013202.1_cds_WP_012808098.1_542	0.436452	0.547458	0.407046
lcl|NC_013202.1_cds_WP_012808099.1_543	0.424576	0.476319	0.382294
lcl|NC_013202.1_cds_WP_012808100.1_546	0.423133	0.729694	0.4031
lcl|NC_013202.1_cds_WP_015761557.1_547	0.4785	0.757532	0.432205
lcl|NC_013202.1_cds_WP_015761558.1_548	0.412015	0.599569	0.400816
lcl|NC_013202.1_cds_WP_015761559.1_549	0.474883	0.773682	0.427353
lcl|NC_013202.1_cds_WP_015761560.1_550	0.425211	0.670156	0.401808
lcl|NC_013202.1_cds_WP_015761561.1_551	0.417864	0.741195	0.386614
lcl|NC_013202.1_cds_WP_015761562.1_552	0.444123	0.691679	0.406828
lcl|NC_013202.1_cds_WP_015761563.1_553	0.445404	0.706247	0.405456
lcl|NC_013202.1_cds_WP_015761564.1_554	0.443138	0.678894	0.403581
lcl|NC_013202.1_cds_WP_015761565.1_555	0.44035	0.739963	0.404549
lcl|NC_013202.1_cds_WP_015761566.1_556	0.354623	0.353402	0.383771
lcl|NC_013202.1_cds_WP_015761567.1_557	0.349548	0.309167	0.392917
lcl|NC_013202.1_cds_WP_015761568.1_558	0.454578	0.649158	0.397628
lcl|NC_013202.1_cds_WP_015761569.1_559	0.441154	0.667168	0.409137
lcl|NC_013202.1_cds_WP_015761570.1_560	0.439903	0.636563	0.402281
lcl|NC_013202.1_cds_WP_015761571.1_561	0.464407	0.720781	0.419342
lcl|NC_013202.1_cds_WP_015761572.1_562	0.461842	0.71981	0.415094
lcl|NC_013202.1_cds_WP_015761573.1_563	0.448034	0.750411	0.413033
lcl|NC_013202.1_cds_WP_015761574.1_564	0.455519	0.727663	0.406337
lcl|NC_013202.1_cds_WP_015761575.1_565	0.47831	0.663968	0.446541
lcl|NC_013202.1_cds_WP_015761576.1_566	0.390934	0.668475	0.380275
lcl|NC_013202.1_cds_WP_015761577.1_567	0.432304	0.780078	0.410601
lcl|NC_013202.1_cds_WP_015761578.1_568	0.451492	0.61993	0.397107
lcl|NC_013202.1_cds_WP_015761579.1_569	0.421208	0.664474	0.387513
lcl|NC_013202.1_cds_WP_015761580.1_570	0.460946	0.806245	0.429067
lcl|NC_013202.1_cds_WP_015761581.1_571	0.455786	0.761942	0.409748
lcl|NC_013202.1_cds_WP_015761582.1_572	0.428449	0.61693	0.388498
lcl|NC_013202.1_cds_WP_015761583.1_573	0.451985	0.717267	0.405641
lcl|NC_013202.1_cds_WP_015761584.1_574	0.432798	0.721071	0.385757
lcl|NC_013202.1_cds_WP_015761585.1_575	0.455311	0.662224	0.397275
lcl|NC_013202.1_cds_WP_015761586.1_576	0.452111	0.719574	0.401118
lcl|NC_013202.1_cds_WP_015761587.1_577	0.425086	0.596624	0.395759
lcl|NC_013202.1_cds_WP_015761588.1_578	0.451122	0.692865	0.408801
lcl|NC_013202.1_cds_WP_015761589.1_579	0.402184	0.62086	0.379656
lcl|NC_013202.1_cds_WP_015761590.1_580	0.404227	0.629793	0.372205
lcl|NC_013202.1_cds_WP_015761591.1_581	0.43098	0.682158	0.395993
lcl|NC_013202.1_cds_WP_015761592.1_582	0.46321	0.697527	0.405111
lcl|NC_013202.1_cds_WP_015761593.1_583	0.442257	0.669015	0.392234
lcl|NC_013202.1_cds_WP_015761594.1_584	0.463799	0.726419	0.425147
lcl|NC_013202.1_cds_WP_015761596.1_586	0.435931	0.712643	0.390915
lcl|NC_013202.1_cds_WP_015761597.1_587	0.451345	0.707628	0.40933
lcl|NC_013202.1_cds_WP_015761598.1_588	0.430905	0.711143	0.408853
lcl|NC_013202.1_cds_WP_015761599.1_589	0.459753	0.665689	0.419159
lcl|NC_013202.1_cds_WP_015761600.1_590	0.428724	0.701498	0.40431
lcl|NC_013202.1_cds_WP_015761601.1_591	0.441474	0.68031	0.402505
lcl|NC_013202.1_cds_WP_015761602.1_592	0.459984	0.743664	0.424626
lcl|NC_013202.1_cds_WP_015761603.1_593	0.446628	0.745601	0.404692
lcl|NC_013202.1_cds_WP_015761604.1_594	0.432503	0.747906	0.397616
lcl|NC_013202.1_cds_WP_015761605.1_595	0.430279	0.74842	0.402628
lcl|NC_013202.1_cds_WP_015761606.1_596	0.435435	0.68128	0.400412
lcl|NC_013202.1_cds_WP_015761607.1_597	0.418097	0.625496	0.403902
lcl|NC_013202.1_cds_WP_015761608.1_598	0.432139	0.671601	0.394344
lcl|NC_013202.1_cds_WP_015761609.1_599	0.446699	0.683112	0.395376
lcl|NC_013202.1_cds_WP_015761610.1_600	0.448448	0.650747	0.401698
lcl|NC_013202.1_cds_WP_015761611.1_601	0.465004	0.709982	0.429147
lcl|NC_013202.1_cds_WP_015761612.1_602	0.445084	0.601668	0.402203
lcl|NC_013202.1_cds_WP_015761614.1_603	0.408486	0.710436	0.388393
lcl|NC_013202.1_cds_WP_015761616.1_605	0.290163	0.137315	0.376051
lcl|NC_013202.1_cds_WP_015761617.1_606	0.465315	0.681606	0.409928
lcl|NC_013202.1_cds_WP_015761618.1_607	0.42033	0.619655	0.399441
lcl|NC_013202.1_cds_WP_015761619.1_608	0.455874	0.693376	0.407798
lcl|NC_013202.1_cds_WP_015761620.1_609	0.416758	0.666832	0.389703
lcl|NC_013202.1_cds_WP_015761621.1_610	0.433783	0.56353	0.38355
lcl|NC_013202.1_cds_WP_015761622.1_611	0.423868	0.52059	0.393668
lcl|NC_013202.1_cds_WP_015761623.1_612	0.440163	0.70644	0.401811
lcl|NC_013202.1_cds_WP_015761625.1_614	0.442807	0.695227	0.405934
lcl|NC_013202.1_cds_WP_015761626.1_615	0.440975	0.651496	0.40068
lcl|NC_013202.1_cds_WP_015761628.1_617	0.44691	0.741807	0.397123
lcl|NC_013202.1_cds_WP_015761629.1_618	0.431303	0.615711	0.396357
lcl|NC_013202.1_cds_WP_015761630.1_619	0.489141	0.705354	0.41602
lcl|NC_013202.1_cds_WP_015761631.1_620	0.40918	0.565566	0.403051
lcl|NC_013202.1_cds_WP_015761632.1_621	0.444453	0.73017	0.416221
lcl|NC_013202.1_cds_WP_015761633.1_622	0.430242	0.776989	0.394111
lcl|NC_013202.1_cds_WP_015761634.1_623	0.402301	0.505194	0.412515
lcl|NC_013202.1_cds_WP_015761636.1_624	0.32257	0.300572	0.392745
lcl|NC_013202.1_cds_WP_015761637.1_625	0.4273	0.649264	0.394395
lcl|NC_013202.1_cds_WP_015761638.1_626	0.42385	0.603585	0.416734
lcl|NC_013202.1_cds_WP_015761639.1_627	0.418289	0.68869	0.405797
lcl|NC_013202.1_cds_WP_015761640.1_628	0.402284	0.531147	0.40311
lcl|NC_013202.1_cds_WP_015761641.1_629	0.384112	0.540151	0.39246
lcl|NC_013202.1_cds_WP_015761642.1_630	0.435626	0.605117	0.397708
lcl|NC_013202.1_cds_WP_015761643.1_631	0.444452	0.744983	0.414777
lcl|NC_013202.1_cds_WP_015761644.1_632	0.451268	0.715637	0.414159
lcl|NC_013202.1_cds_WP_015761645.1_633	0.438953	0.715831	0.410814
lcl|NC_013202.1_cds_WP_015761646.1_634	0.427889	0.647558	0.390092
lcl|NC_013202.1_cds_WP_015761647.1_635	0.417194	0.759672	0.39767
lcl|NC_013202.1_cds_WP_015761648.1_636	0.411562	0.60767	0.394057
lcl|NC_013202.1_cds_WP_015761649.1_637	0.394424	0.63047	0.380864
lcl|NC_013202.1_cds_WP_015761650.1_638	0.464859	0.750189	0.417758
lcl|NC_013202.1_cds_WP_015761652.1_640	0.440722	0.703809	0.398314
lcl|NC_013202.1_cds_WP_015761653.1_641	0.427372	0.646054	0.397474
lcl|NC_013202.1_cds_WP_015761654.1_642	0.446895	0.673667	0.403374
lcl|NC_013202.1_cds_WP_015761655.1_643	0.448461	0.766533	0.403015
lcl|NC_013202.1_cds_WP_015761656.1_644	0.439815	0.693254	0.39955
lcl|NC_013202.1_cds_WP_015761657.1_645	0.387458	0.441634	0.40008
lcl|NC_013202.1_cds_WP_015761658.1_646	0.447994	0.697196	0.401728
lcl|NC_013202.1_cds_WP_015761659.1_647	0.445762	0.640457	0.395329
lcl|NC_013202.1_cds_WP_015761660.1_648	0.420989	0.693301	0.394115
lcl|NC_013202.1_cds_WP_015761661.1_649	0.46323	0.755544	0.418526
lcl|NC_013202.1_cds_WP_015761662.1_650	0.453634	0.701866	0.402102
lcl|NC_013202.1_cds_WP_015761663.1_651	0.432783	0.738511	0.402939
lcl|NC_013202.1_cds_WP_015761664.1_652	0.453065	0.696414	0.414795
lcl|NC_013202.1_cds_WP_015761665.1_653	0.434654	0.701676	0.395897
lcl|NC_013202.1_cds_WP_015761666.1_654	0.451733	0.756895	0.419526
lcl|NC_013202.1_cds_WP_015761667.1_655	0.441809	0.785852	0.420054
lcl|NC_013202.1_cds_WP_015761668.1_656	0.450132	0.706743	0.406415
lcl|NC_013202.1_cds_WP_015761669.1_657	0.433322	0.739702	0.387589
lcl|NC_013202.1_cds_WP_015761670.1_658	0.402224	0.584978	0.396863
lcl|NC_013202.1_cds_WP_015761671.1_659	0.429444	0.733967	0.403703
lcl|NC_013202.1_cds_WP_015761672.1_660	0.43815	0.742164	0.406327
lcl|NC_013202.1_cds_WP_015761673.1_661	0.456023	0.635198	0.391688
lcl|NC_013202.1_cds_WP_015761674.1_662	0.427462	0.67849	0.402916
lcl|NC_013202.1_cds_WP_015761675.1_663	0.424867	0.698564	0.405895
lcl|NC_013202.1_cds_WP_015761676.1_664	0.40122	0.650029	0.379687
lcl|NC_013202.1_cds_WP_015761677.1_665	0.460559	0.715485	0.422941
lcl|NC_013202.1_cds_WP_015761678.1_666	0.442458	0.805499	0.419089
lcl|NC_013202.1_cds_WP_015761679.1_667	0.417439	0.623801	0.40445
lcl|NC_013202.1_cds_WP_015761680.1_668	0.436618	0.720457	0.401432
lcl|NC_013202.1_cds_WP_015761681.1_669	0.435548	0.707213	0.418805
lcl|NC_013202.1_cds_WP_015761682.1_670	0.443639	0.68333	0.408685
lcl|NC_013202.1_cds_WP_015761684.1_673	0.398974	0.689042	0.395013
lcl|NC_013202.1_cds_WP_015761685.1_674	0.443458	0.691908	0.401267
lcl|NC_013202.1_cds_WP_015761686.1_675	0.437316	0.745801	0.400086
lcl|NC_013202.1_cds_WP_015761687.1_676	0.445913	0.689785	0.408042
lcl|NC_013202.1_cds_WP_015761688.1_677	0.440974	0.782493	0.410153
lcl|NC_013202.1_cds_WP_015761689.1_678	0.405961	0.583164	0.385445
lcl|NC_013202.1_cds_WP_015761690.1_679	0.41739	0.595787	0.391267
lcl|NC_013202.1_cds_WP_015761691.1_680	0.414854	0.645395	0.378251
lcl|NC_013202.1_cds_WP_015761692.1_681	0.439219	0.732144	0.402549
lcl|NC_013202.1_cds_WP_015761693.1_682	0.437556	0.761262	0.408861
lcl|NC_013202.1_cds_WP_015761694.1_683	0.446438	0.655893	0.403318
lcl|NC_013202.1_cds_WP_015761695.1_684	0.433659	0.703554	0.402315
lcl|NC_013202.1_cds_WP_015761696.1_685	0.433593	0.654067	0.406359
lcl|NC_013202.1_cds_WP_015761697.1_686	0.413586	0.56052	0.390141
lcl|NC_013202.1_cds_WP_015761698.1_687	0.380476	0.678009	0.371216
lcl|NC_013202.1_cds_WP_015761699.1_688	0.415392	0.655579	0.387877
lcl|NC_013202.1_cds_WP_015761700.1_689	0.43322	0.66405	0.407253
lcl|NC_013202.1_cds_WP_015761701.1_690	0.427797	0.709568	0.397701
lcl|NC_013202.1_cds_WP_015761702.1_691	0.337189	0.286819	0.39447
lcl|NC_013202.1_cds_WP_015761705.1_692	0.456371	0.716638	0.408427
lcl|NC_013202.1_cds_WP_015761706.1_693	0.39404	0.73307	0.39708
lcl|NC_013202.1_cds_WP_015761707.1_694	0.408723	0.632239	0.392133
lcl|NC_013202.1_cds_WP_015761708.1_695	0.400626	0.481539	0.389335
lcl|NC_013202.1_cds_WP_015761709.1_696	0.424535	0.695863	0.405089
lcl|NC_013202.1_cds_WP_015761710.1_697	0.445875	0.605916	0.423013
lcl|NC_013202.1_cds_WP_015761712.1_699	0.444477	0.698907	0.399792
lcl|NC_013202.1_cds_WP_015761713.1_700	0.429751	0.7096	0.394801
lcl|NC_013202.1_cds_WP_015761714.1_701	0.459311	0.736526	0.420411
lcl|NC_013202.1_cds_WP_015761715.1_702	0.437866	0.723911	0.399135
lcl|NC_013202.1_cds_WP_015761716.1_703	0.455866	0.749375	0.404971
lcl|NC_013202.1_cds_WP_015761717.1_704	0.418451	0.611707	0.395368
lcl|NC_013202.1_cds_WP_015761718.1_705	0.41304	0.617098	0.392373
lcl|NC_013202.1_cds_WP_015761719.1_706	0.426343	0.702013	0.40764
lcl|NC_013202.1_cds_WP_015761720.1_707	0.462753	0.758022	0.423229
lcl|NC_013202.1_cds_WP_015761721.1_708	0.412901	0.647577	0.403247
lcl|NC_013202.1_cds_WP_015761722.1_709	0.43193	0.704407	0.394634
lcl|NC_013202.1_cds_WP_015761723.1_710	0.462213	0.782601	0.411301
lcl|NC_013202.1_cds_WP_015761724.1_711	0.438388	0.665163	0.403693
lcl|NC_013202.1_cds_WP_015761725.1_712	0.448372	0.699077	0.401958
lcl|NC_013202.1_cds_WP_015761726.1_713	0.431755	0.550855	0.391252
lcl|NC_013202.1_cds_WP_015761727.1_714	0.472862	0.736234	0.425465
lcl|NC_013202.1_cds_WP_015761728.1_715	0.430213	0.663711	0.385395
lcl|NC_013202.1_cds_WP_015761729.1_716	0.45859	0.723612	0.407905
lcl|NC_013202.1_cds_WP_015761731.1_718	0.450562	0.751095	0.416748
lcl|NC_013202.1_cds_WP_015761732.1_719	0.39879	0.439228	0.39312
lcl|NC_013202.1_cds_WP_015761733.1_720	0.46747	0.717536	0.413906
lcl|NC_013202.1_cds_WP_015761734.1_721	0.440664	0.662196	0.417626
lcl|NC_013202.1_cds_WP_015761735.1_722	0.460758	0.769615	0.420978
lcl|NC_013202.1_cds_WP_015761736.1_723	0.457263	0.610113	0.414565
lcl|NC_013202.1_cds_WP_015761737.1_724	0.440792	0.742736	0.40799
lcl|NC_013202.1_cds_WP_015761738.1_725	0.449535	0.654206	0.398648
lcl|NC_013202.1_cds_WP_015761739.1_726	0.442739	0.660484	0.410549
lcl|NC_013202.1_cds_WP_015761741.1_728	0.366344	0.502178	0.381462
lcl|NC_013202.1_cds_WP_015761742.1_729	0.441844	0.747544	0.408327
lcl|NC_013202.1_cds_WP_015761743.1_730	0.42866	0.683513	0.407487
lcl|NC_013202.1_cds_WP_015761746.1_734	0.434071	0.620901	0.406149
lcl|NC_013202.1_cds_WP_015761747.1_735	0.444229	0.580755	0.405018
lcl|NC_013202.1_cds_WP_015761748.1_736	0.438963	0.749657	0.408851
lcl|NC_013202.1_cds_WP_015761749.1_737	0.462445	0.716014	0.413275
lcl|NC_013202.1_cds_WP_015761750.1_738	0.403334	0.688474	0.396042
lcl|NC_013202.1_cds_WP_015761751.1_739	0.445533	0.715127	0.411909
lcl|NC_013202.1_cds_WP_015761752.1_740	0.420828	0.714573	0.400802
lcl|NC_013202.1_cds_WP_015761753.1_741	0.424626	0.632533	0.41126
lcl|NC_013202.1_cds_WP_015761754.1_742	0.459677	0.718595	0.415236
lcl|NC_013202.1_cds_WP_015761755.1_743	0.447437	0.727465	0.4098
lcl|NC_013202.1_cds_WP_015761756.1_744	0.46814	0.787041	0.421949
lcl|NC_013202.1_cds_WP_015761758.1_745	0.438287	0.668501	0.393458
lcl|NC_013202.1_cds_WP_015761759.1_746	0.435911	0.762266	0.388565
lcl|NC_013202.1_cds_WP_015761760.1_747	0.440419	0.727928	0.397325
lcl|NC_013202.1_cds_WP_015761761.1_748	0.438945	0.692421	0.401029
lcl|NC_013202.1_cds_WP_015761762.1_749	0.395627	0.468239	0.396982
lcl|NC_013202.1_cds_WP_015761763.1_750	0.414876	0.476771	0.407874
lcl|NC_013202.1_cds_WP_015761765.1_752	0.403664	0.406785	0.383874
lcl|NC_013202.1_cds_WP_015761766.1_753	0.39484	0.393246	0.394331
lcl|NC_013202.1_cds_WP_015761768.1_755	0.391098	0.404976	0.403688
lcl|NC_013202.1_cds_WP_015761769.1_756	0.407268	0.479898	0.400556
lcl|NC_013202.1_cds_WP_015761771.1_757	0.440325	0.572763	0.369152
lcl|NC_013202.1_cds_WP_015761772.1_758	0.433637	0.732399	0.401241
lcl|NC_013202.1_cds_WP_015761774.1_759	0.44712	0.724724	0.420827
lcl|NC_013202.1_cds_WP_015761775.1_760	0.435124	0.757153	0.404305
lcl|NC_013202.1_cds_WP_015761776.1_761	0.460428	0.6463	0.417143
lcl|NC_013202.1_cds_WP_015761777.1_762	0.40979	0.563488	0.387919
lcl|NC_013202.1_cds_WP_015761778.1_763	0.43789	0.67798	0.398951
lcl|NC_013202.1_cds_WP_015761779.1_764	0.45772	0.704269	0.409241
lcl|NC_013202.1_cds_WP_015761780.1_765	0.414753	0.519202	0.387825
lcl|NC_013202.1_cds_WP_015761781.1_766	0.427715	0.630563	0.408832
lcl|NC_013202.1_cds_WP_015761782.1_767	0.432229	0.661866	0.411836
lcl|NC_013202.1_cds_WP_015761786.1_769	0.370731	0.492284	0.384522
lcl|NC_013202.1_cds_WP_015761787.1_770	0.36352	0.37871	0.375327
lcl|NC_013202.1_cds_WP_015761788.1_771	0.352101	0.321062	0.385948
lcl|NC_013202.1_cds_WP_015761789.1_772	0.378729	0.485603	0.38456
lcl|NC_013202.1_cds_WP_015761790.1_773	0.362598	0.327851	0.398284
lcl|NC_013202.1_cds_WP_015761791.1_774	0.418165	0.62548	0.414122
lcl|NC_013202.1_cds_WP_015761792.1_775	0.451097	0.654649	0.415661
lcl|NC_013202.1_cds_WP_015761793.1_776	0.437663	0.611632	0.413065
lcl|NC_013202.1_cds_WP_015761794.1_777	0.428591	0.663529	0.398014
lcl|NC_013202.1_cds_WP_015761795.1_778	0.413425	0.612825	0.399457
lcl|NC_013202.1_cds_WP_015761796.1_779	0.428001	0.647374	0.406807
lcl|NC_013202.1_cds_WP_015761797.1_780	0.376047	0.35128	0.385999
lcl|NC_013202.1_cds_WP_015761798.1_781	0.435604	0.708011	0.406255
lcl|NC_013202.1_cds_WP_015761799.1_782	0.457759	0.585536	0.411913
lcl|NC_013202.1_cds_WP_015761800.1_783	0.455731	0.697832	0.417188
lcl|NC_013202.1_cds_WP_015761802.1_784	0.447768	0.72272	0.411696
lcl|NC_013202.1_cds_WP_015761803.1_785	0.431068	0.616054	0.403834
lcl|NC_013202.1_cds_WP_015761804.1_786	0.417576	0.542796	0.391198
lcl|NC_013202.1_cds_WP_015761805.1_787	0.42323	0.558605	0.399633
lcl|NC_013202.1_cds_WP_015761807.1_788	0.452977	0.778662	0.421632
lcl|NC_013202.1_cds_WP_015761808.1_789	0.417354	0.517736	0.410002
lcl|NC_013202.1_cds_WP_015761810.1_790	0.398359	0.485651	0.40723
lcl|NC_013202.1_cds_WP_015761813.1_792	0.457131	0.716368	0.401842
lcl|NC_013202.1_cds_WP_015761814.1_793	0.444403	0.742224	0.411177
lcl|NC_013202.1_cds_WP_015761815.1_794	0.410009	0.565117	0.39594
lcl|NC_013202.1_cds_WP_015761816.1_795	0.442637	0.752163	0.412833
lcl|NC_013202.1_cds_WP_015761817.1_796	0.458579	0.674711	0.403634
lcl|NC_013202.1_cds_WP_015761818.1_797	0.432479	0.669756	0.378649
lcl|NC_013202.1_cds_WP_015761819.1_798	0.428628	0.673765	0.393534
lcl|NC_013202.1_cds_WP_015761820.1_799	0.435846	0.65696	0.401255
lcl|NC_013202.1_cds_WP_015761821.1_800	0.416829	0.752047	0.396343
lcl|NC_013202.1_cds_WP_015761822.1_801	0.440675	0.730849	0.405576
lcl|NC_013202.1_cds_WP_015761823.1_802	0.43831	0.658226	0.382453
lcl|NC_013202.1_cds_WP_015761824.1_803	0.416524	0.726686	0.391073
lcl|NC_013202.1_cds_WP_015761825.1_804	0.453847	0.675422	0.407838
lcl|NC_013202.1_cds_WP_015761826.1_805	0.449542	0.759635	0.412909
lcl|NC_013202.1_cds_WP_015761827.1_806	0.419797	0.663427	0.395448
lcl|NC_013202.1_cds_WP_015761828.1_807	0.43296	0.727491	0.400571
lcl|NC_013202.1_cds_WP_015761829.1_808	0.435079	0.745174	0.416326
lcl|NC_013202.1_cds_WP_015761830.1_809	0.435086	0.673135	0.405324
lcl|NC_013202.1_cds_WP_015761831.1_810	0.436971	0.697304	0.401282
lcl|NC_013202.1_cds_WP_015761832.1_811	0.44989	0.733573	0.391061
lcl|NC_013202.1_cds_WP_015761833.1_812	0.425641	0.768187	0.410738
lcl|NC_013202.1_cds_WP_015761834.1_813	0.451021	0.651728	0.408934
lcl|NC_013202.1_cds_WP_015761835.1_814	0.413097	0.774642	0.407801
lcl|NC_013202.1_cds_WP_015761836.1_815	0.429636	0.659519	0.396133
lcl|NC_013202.1_cds_WP_015761837.1_816	0.443456	0.712425	0.412533
lcl|NC_013202.1_cds_WP_015761838.1_817	0.442251	0.661743	0.406311
lcl|NC_013202.1_cds_WP_015761839.1_818	0.434387	0.70492	0.394932
lcl|NC_013202.1_cds_WP_015761840.1_819	0.434472	0.641931	0.397725
lcl|NC_013202.1_cds_WP_015761842.1_820	0.463702	0.764643	0.408629
lcl|NC_013202.1_cds_WP_015761843.1_821	0.442861	0.728979	0.407245
lcl|NC_013202.1_cds_WP_015761844.1_822	0.431665	0.649677	0.400653
lcl|NC_013202.1_cds_WP_015761846.1_825	0.374658	0.423474	0.390504
lcl|NC_013202.1_cds_WP_015761848.1_827	0.396603	0.450743	0.396913
lcl|NC_013202.1_cds_WP_015761849.1_829	0.378145	0.39395	0.412815
lcl|NC_013202.1_cds_WP_015761851.1_830	0.434853	0.743171	0.393069
lcl|NC_013202.1_cds_WP_015761852.1_831	0.423982	0.659509	0.3936
lcl|NC_013202.1_cds_WP_015761853.1_832	0.431268	0.699848	0.391453
lcl|NC_013202.1_cds_WP_015761854.1_833	0.445781	0.667151	0.408353
lcl|NC_013202.1_cds_WP_015761855.1_834	0.462065	0.702808	0.431529
lcl|NC_013202.1_cds_WP_015761856.1_835	0.433018	0.684519	0.394244
lcl|NC_013202.1_cds_WP_015761857.1_836	0.43739	0.68851	0.389194
lcl|NC_013202.1_cds_WP_015761858.1_837	0.451912	0.761043	0.415516
lcl|NC_013202.1_cds_WP_015761859.1_838	0.446632	0.727219	0.403545
lcl|NC_013202.1_cds_WP_015761860.1_839	0.449389	0.690171	0.421049
lcl|NC_013202.1_cds_WP_015761861.1_840	0.42818	0.616781	0.394622
lcl|NC_013202.1_cds_WP_015761862.1_841	0.444304	0.699608	0.400038
lcl|NC_013202.1_cds_WP_015761863.1_842	0.42044	0.692219	0.387283
lcl|NC_013202.1_cds_WP_015761864.1_843	0.447004	0.741198	0.409592
lcl|NC_013202.1_cds_WP_015761865.1_844	0.463721	0.65632	0.405276
lcl|NC_013202.1_cds_WP_015761866.1_845	0.431325	0.728265	0.388649
lcl|NC_013202.1_cds_WP_015761867.1_846	0.432426	0.662813	0.39441
lcl|NC_013202.1_cds_WP_015761868.1_847	0.446485	0.750359	0.397829
lcl|NC_013202.1_cds_WP_015761870.1_848	0.465759	0.660867	0.424829
lcl|NC_013202.1_cds_WP_015761871.1_849	0.433845	0.632229	0.394223
lcl|NC_013202.1_cds_WP_015761872.1_850	0.442492	0.702778	0.401637
lcl|NC_013202.1_cds_WP_015761873.1_851	0.474821	0.750599	0.413977
lcl|NC_013202.1_cds_WP_015761874.1_852	0.411116	0.701025	0.388495
lcl|NC_013202.1_cds_WP_015761875.1_853	0.43352	0.71047	0.410201
lcl|NC_013202.1_cds_WP_015761876.1_854	0.45652	0.737393	0.411815
lcl|NC_013202.1_cds_WP_015761877.1_855	0.447114	0.711894	0.411165
lcl|NC_013202.1_cds_WP_015761878.1_856	0.452299	0.762485	0.412625
lcl|NC_013202.1_cds_WP_015761879.1_857	0.433132	0.69117	0.39394
lcl|NC_013202.1_cds_WP_015761880.1_858	0.450676	0.68175	0.414347
lcl|NC_013202.1_cds_WP_015761881.1_859	0.438711	0.769866	0.402467
lcl|NC_013202.1_cds_WP_015761882.1_860	0.421519	0.616691	0.392699
lcl|NC_013202.1_cds_WP_015761883.1_861	0.428039	0.747113	0.392683
lcl|NC_013202.1_cds_WP_015761884.1_862	0.429858	0.809597	0.411473
lcl|NC_013202.1_cds_WP_015761885.1_863	0.435186	0.681593	0.390026
lcl|NC_013202.1_cds_WP_015761886.1_864	0.427502	0.655593	0.389744
lcl|NC_013202.1_cds_WP_015761887.1_865	0.430886	0.693871	0.400875
lcl|NC_013202.1_cds_WP_015761888.1_866	0.450992	0.763394	0.414629
lcl|NC_013202.1_cds_WP_015761889.1_867	0.43216	0.690962	0.391391
lcl|NC_013202.1_cds_WP_015761890.1_868	0.445044	0.752516	0.406325
lcl|NC_013202.1_cds_WP_015761891.1_869	0.45176	0.658983	0.402911
lcl|NC_013202.1_cds_WP_015761892.1_870	0.444781	0.706796	0.404516
lcl|NC_013202.1_cds_WP_015761893.1_871	0.477283	0.796704	0.428674
lcl|NC_013202.1_cds_WP_015761894.1_872	0.384584	0.331493	0.398269
lcl|NC_013202.1_cds_WP_015761895.1_873	0.450545	0.682677	0.399326
lcl|NC_013202.1_cds_WP_015761896.1_874	0.465313	0.692481	0.43384
lcl|NC_013202.1_cds_WP_015761897.1_875	0.459214	0.711377	0.414379
lcl|NC_013202.1_cds_WP_015761898.1_876	0.450659	0.694385	0.407502
lcl|NC_013202.1_cds_WP_015761899.1_877	0.420698	0.708284	0.402603
lcl|NC_013202.1_cds_WP_015761900.1_878	0.410888	0.641389	0.391364
lcl|NC_013202.1_cds_WP_015761901.1_879	0.45288	0.75503	0.412427
lcl|NC_013202.1_cds_WP_015761902.1_880	0.409623	0.585811	0.399209
lcl|NC_013202.1_cds_WP_015761903.1_881	0.445084	0.755936	0.39442
lcl|NC_013202.1_cds_WP_015761904.1_882	0.457118	0.705601	0.418848
lcl|NC_013202.1_cds_WP_015761905.1_883	0.439731	0.671637	0.399934
lcl|NC_013202.1_cds_WP_015761906.1_884	0.446374	0.611939	0.405913
lcl|NC_013202.1_cds_WP_015761907.1_885	0.445656	0.72289	0.413651
lcl|NC_013202.1_cds_WP_015761908.1_886	0.465141	0.77999	0.409382
lcl|NC_013202.1_cds_WP_015761909.1_887	0.442952	0.744838	0.408629
lcl|NC_013202.1_cds_WP_015761910.1_888	0.449987	0.672456	0.419638
lcl|NC_013202.1_cds_WP_015761911.1_889	0.428467	0.559761	0.412677
lcl|NC_013202.1_cds_WP_015761912.1_890	0.443359	0.774093	0.411195
lcl|NC_013202.1_cds_WP_015761913.1_891	0.433935	0.597274	0.396845
lcl|NC_013202.1_cds_WP_015761915.1_892	0.4422	0.662428	0.414445
lcl|NC_013202.1_cds_WP_015761916.1_893	0.430623	0.668358	0.396811
lcl|NC_013202.1_cds_WP_015761917.1_894	0.432644	0.687764	0.404927
lcl|NC_013202.1_cds_WP_015761919.1_896	0.443344	0.72473	0.394479
lcl|NC_013202.1_cds_WP_015761921.1_898	0.416804	0.707842	0.399674
lcl|NC_013202.1_cds_WP_015761922.1_899	0.427762	0.658553	0.410987
lcl|NC_013202.1_cds_WP_015761923.1_900	0.428723	0.565811	0.388695
lcl|NC_013202.1_cds_WP_015761924.1_901	0.42328	0.687905	0.398519
lcl|NC_013202.1_cds_WP_015761925.1_902	0.422808	0.718675	0.390569
lcl|NC_013202.1_cds_WP_015761927.1_903	0.377293	0.497228	0.398215
lcl|NC_013202.1_cds_WP_015761928.1_904	0.370389	0.434898	0.388348
lcl|NC_013202.1_cds_WP_015761930.1_905	0.430672	0.609751	0.413288
lcl|NC_013202.1_cds_WP_015761931.1_906	0.422217	0.68425	0.409252
lcl|NC_013202.1_cds_WP_015761933.1_908	0.426515	0.435472	0.404472
lcl|NC_013202.1_cds_WP_015761934.1_909	0.362486	0.504586	0.388829
lcl|NC_013202.1_cds_WP_015761935.1_910	0.398228	0.540379	0.404236
lcl|NC_013202.1_cds_WP_015761936.1_911	0.377372	0.396559	0.396573
lcl|NC_013202.1_cds_WP_015761937.1_912	0.281004	0.118927	0.379435
lcl|NC_013202.1_cds_WP_015761938.1_913	0.406507	0.476906	0.408978
lcl|NC_013202.1_cds_WP_015761939.1_914	0.412286	0.483986	0.398373
lcl|NC_013202.1_cds_WP_015761941.1_916	0.381806	0.295286	0.37909
lcl|NC_013202.1_cds_WP_015761943.1_918	0.445689	0.7319	0.40328
lcl|NC_013202.1_cds_WP_015761944.1_920	0.419202	0.627369	0.396019
lcl|NC_013202.1_cds_WP_015761945.1_921	0.486406	0.700032	0.433808
lcl|NC_013202.1_cds_WP_015761946.1_922	0.448959	0.791968	0.415427
lcl|NC_013202.1_cds_WP_015761947.1_923	0.403304	0.486398	0.413886
lcl|NC_013202.1_cds_WP_015761949.1_924	0.417899	0.560027	0.400729
lcl|NC_013202.1_cds_WP_015761950.1_925	0.42784	0.609035	0.394237
lcl|NC_013202.1_cds_WP_015761951.1_926	0.417346	0.534053	0.394131
lcl|NC_013202.1_cds_WP_015761952.1_927	0.42038	0.635699	0.409195
lcl|NC_013202.1_cds_WP_015761953.1_928	0.440078	0.679275	0.414943
lcl|NC_013202.1_cds_WP_015761954.1_929	0.446182	0.680704	0.410822
lcl|NC_013202.1_cds_WP_015761955.1_930	0.412942	0.567003	0.393637
lcl|NC_013202.1_cds_WP_015761956.1_931	0.428107	0.745918	0.402866
lcl|NC_013202.1_cds_WP_015761957.1_932	0.443796	0.689898	0.404229
lcl|NC_013202.1_cds_WP_015761958.1_933	0.435591	0.765993	0.394013
lcl|NC_013202.1_cds_WP_015761959.1_934	0.434538	0.597481	0.406661
lcl|NC_013202.1_cds_WP_015761960.1_935	0.453997	0.746069	0.400796
lcl|NC_013202.1_cds_WP_015761961.1_936	0.436264	0.607832	0.399469
lcl|NC_013202.1_cds_WP_015761962.1_937	0.431916	0.702662	0.402869
lcl|NC_013202.1_cds_WP_015761963.1_938	0.463449	0.709166	0.434151
lcl|NC_013202.1_cds_WP_015761964.1_939	0.467798	0.841146	0.414656
lcl|NC_013202.1_cds_WP_015761965.1_940	0.475067	0.81794	0.431922
lcl|NC_013202.1_cds_WP_015761966.1_941	0.451209	0.731439	0.416601
lcl|NC_013202.1_cds_WP_015761967.1_942	0.44576	0.718535	0.400687
lcl|NC_013202.1_cds_WP_015761968.1_943	0.459534	0.739349	0.417749
lcl|NC_013202.1_cds_WP_015761969.1_944	0.412076	0.633612	0.379494
lcl|NC_013202.1_cds_WP_015761970.1_946	0.470189	0.615044	0.425947
lcl|NC_013202.1_cds_WP_015761972.1_948	0.454459	0.687359	0.414926
lcl|NC_013202.1_cds_WP_015761973.1_949	0.430061	0.630041	0.398552
lcl|NC_013202.1_cds_WP_015761974.1_950	0.413518	0.693086	0.398836
lcl|NC_013202.1_cds_WP_015761975.1_951	0.449899	0.694284	0.410509
lcl|NC_013202.1_cds_WP_015761977.1_953	0.439593	0.703361	0.398262
lcl|NC_013202.1_cds_WP_015761978.1_954	0.357086	0.374473	0.404223
lcl|NC_013202.1_cds_WP_015761979.1_955	0.437626	0.757018	0.403007
lcl|NC_013202.1_cds_WP_015761980.1_956	0.44733	0.664199	0.398966
lcl|NC_013202.1_cds_WP_015761981.1_957	0.410929	0.691265	0.382456
lcl|NC_013202.1_cds_WP_015761982.1_958	0.44799	0.717045	0.398641
lcl|NC_013202.1_cds_WP_015761983.1_959	0.413424	0.564657	0.38511
lcl|NC_013202.1_cds_WP_015761984.1_960	0.421783	0.609358	0.389821
lcl|NC_013202.1_cds_WP_015761985.1_961	0.432169	0.557963	0.402114
lcl|NC_013202.1_cds_WP_015761986.1_962	0.419244	0.609155	0.388882
lcl|NC_013202.1_cds_WP_015761987.1_963	0.424572	0.683377	0.380458
lcl|NC_013202.1_cds_WP_015761988.1_964	0.406616	0.631425	0.380855
lcl|NC_013202.1_cds_WP_015761990.1_966	0.441349	0.697842	0.415706
lcl|NC_013202.1_cds_WP_015761991.1_967	0.41111	0.514902	0.398069
lcl|NC_013202.1_cds_WP_015761993.1_969	0.449803	0.705729	0.409211
lcl|NC_013202.1_cds_WP_015761994.1_971	0.42601	0.752175	0.412982
lcl|NC_013202.1_cds_WP_015761995.1_972	0.412568	0.546484	0.389981
lcl|NC_013202.1_cds_WP_015761996.1_973	0.426456	0.674827	0.401558
lcl|NC_013202.1_cds_WP_015761997.1_974	0.408448	0.660972	0.381365
lcl|NC_013202.1_cds_WP_015761998.1_975	0.425655	0.640022	0.396221
lcl|NC_013202.1_cds_WP_015761999.1_976	0.430561	0.691089	0.402483
lcl|NC_013202.1_cds_WP_015762000.1_977	0.45972	0.729512	0.418666
lcl|NC_013202.1_cds_WP_015762001.1_978	0.446532	0.758262	0.410921
lcl|NC_013202.1_cds_WP_015762002.1_979	0.429184	0.722254	0.399024
lcl|NC_013202.1_cds_WP_015762003.1_980	0.437737	0.633987	0.405763
lcl|NC_013202.1_cds_WP_015762005.1_982	0.436186	0.699204	0.400409
lcl|NC_013202.1_cds_WP_015762006.1_983	0.44947	0.701583	0.399674
lcl|NC_013202.1_cds_WP_015762007.1_984	0.427009	0.584624	0.391918
lcl|NC_013202.1_cds_WP_015762008.1_985	0.43076	0.691255	0.396237
lcl|NC_013202.1_cds_WP_015762009.1_986	0.428488	0.688811	0.397812
lcl|NC_013202.1_cds_WP_015762010.1_987	0.414562	0.434593	0.394734
lcl|NC_013202.1_cds_WP_015762011.1_988	0.386948	0.371578	0.397677
lcl|NC_013202.1_cds_WP_015762012.1_989	0.401978	0.439733	0.388811
lcl|NC_013202.1_cds_WP_015762013.1_990	0.432829	0.611737	0.411141
lcl|NC_013202.1_cds_WP_015762014.1_991	0.441962	0.669746	0.403664
lcl|NC_013202.1_cds_WP_015762015.1_992	0.437518	0.660384	0.413754
lcl|NC_013202.1_cds_WP_015762016.1_993	0.42297	0.603267	0.376689
lcl|NC_013202.1_cds_WP_015762017.1_994	0.411342	0.611411	0.385146
lcl|NC_013202.1_cds_WP_015762018.1_995	0.437945	0.601611	0.400331
lcl|NC_013202.1_cds_WP_015762019.1_996	0.409823	0.628712	0.394521
lcl|NC_013202.1_cds_WP_015762020.1_997	0.407442	0.604313	0.385142
lcl|NC_013202.1_cds_WP_015762021.1_998	0.43426	0.641772	0.399898
lcl|NC_013202.1_cds_WP_015762022.1_999	0.448309	0.643081	0.407238
lcl|NC_013202.1_cds_WP_015762023.1_1000	0.417315	0.779863	0.400397
lcl|NC_013202.1_cds_WP_015762024.1_1001	0.430931	0.572102	0.406662
lcl|NC_013202.1_cds_WP_015762026.1_1004	0.441223	0.689593	0.400446
lcl|NC_013202.1_cds_WP_015762027.1_1005	0.39187	0.641597	0.386409
lcl|NC_013202.1_cds_WP_015762028.1_1006	0.450926	0.768639	0.413848
lcl|NC_013202.1_cds_WP_015762029.1_1007	0.464621	0.681143	0.430959
lcl|NC_013202.1_cds_WP_015762030.1_1008	0.477323	0.641868	0.418725
lcl|NC_013202.1_cds_WP_015762032.1_1009	0.445787	0.723952	0.405285
lcl|NC_013202.1_cds_WP_015762034.1_1011	0.443768	0.746696	0.413111
lcl|NC_013202.1_cds_WP_015762035.1_1012	0.432651	0.666989	0.401292
lcl|NC_013202.1_cds_WP_015762036.1_1013	0.414642	0.663084	0.394048
lcl|NC_013202.1_cds_WP_015762037.1_1014	0.435518	0.721012	0.407118
lcl|NC_013202.1_cds_WP_015762038.1_1015	0.429663	0.58926	0.39711
lcl|NC_013202.1_cds_WP_015762039.1_1016	0.4502	0.706852	0.417197
lcl|NC_013202.1_cds_WP_015762040.1_1017	0.442451	0.747702	0.402556
lcl|NC_013202.1_cds_WP_015762041.1_1018	0.453538	0.690689	0.394733
lcl|NC_013202.1_cds_WP_015762042.1_1019	0.453227	0.646632	0.393693
lcl|NC_013202.1_cds_WP_015762044.1_1020	0.448774	0.705281	0.412564
lcl|NC_013202.1_cds_WP_015762045.1_1021	0.436618	0.711905	0.401386
lcl|NC_013202.1_cds_WP_015762046.1_1022	0.422513	0.587584	0.391221
lcl|NC_013202.1_cds_WP_015762047.1_1023	0.454854	0.703652	0.402729
lcl|NC_013202.1_cds_WP_015762048.1_1024	0.446992	0.617207	0.395527
lcl|NC_013202.1_cds_WP_015762049.1_1025	0.43747	0.571138	0.410616
lcl|NC_013202.1_cds_WP_015762050.1_1026	0.438118	0.617202	0.39615
lcl|NC_013202.1_cds_WP_015762051.1_1027	0.482245	0.653089	0.423501
lcl|NC_013202.1_cds_WP_015762052.1_1028	0.407319	0.572624	0.387644
lcl|NC_013202.1_cds_WP_015762053.1_1029	0.454632	0.591034	0.404865
lcl|NC_013202.1_cds_WP_015762054.1_1030	0.423142	0.468855	0.402084
lcl|NC_013202.1_cds_WP_015762055.1_1031	0.441441	0.653407	0.405929
lcl|NC_013202.1_cds_WP_015762056.1_1032	0.46082	0.709127	0.403686
lcl|NC_013202.1_cds_WP_015762057.1_1033	0.440041	0.724683	0.395617
lcl|NC_013202.1_cds_WP_015762058.1_1034	0.421827	0.737659	0.402908
lcl|NC_013202.1_cds_WP_015762059.1_1035	0.434549	0.674518	0.393778
lcl|NC_013202.1_cds_WP_015762060.1_1036	0.456187	0.708011	0.415227
lcl|NC_013202.1_cds_WP_015762061.1_1037	0.457157	0.777134	0.420233
lcl|NC_013202.1_cds_WP_015762062.1_1038	0.468388	0.720182	0.420463
lcl|NC_013202.1_cds_WP_015762064.1_1040	0.422553	0.65437	0.398938
lcl|NC_013202.1_cds_WP_015762065.1_1041	0.437705	0.645776	0.393005
lcl|NC_013202.1_cds_WP_015762066.1_1042	0.447263	0.707103	0.39908
lcl|NC_013202.1_cds_WP_015762067.1_1043	0.452205	0.65735	0.397447
lcl|NC_013202.1_cds_WP_015762068.1_1044	0.451365	0.695753	0.401641
lcl|NC_013202.1_cds_WP_015762070.1_1046	0.430301	0.742766	0.408737
lcl|NC_013202.1_cds_WP_015762071.1_1047	0.443327	0.706289	0.420444
lcl|NC_013202.1_cds_WP_015762072.1_1048	0.461363	0.6633	0.413497
lcl|NC_013202.1_cds_WP_015762073.1_1049	0.430228	0.609475	0.400554
lcl|NC_013202.1_cds_WP_015762074.1_1050	0.422819	0.647188	0.387863
lcl|NC_013202.1_cds_WP_015762075.1_1051	0.450045	0.765134	0.415059
lcl|NC_013202.1_cds_WP_015762076.1_1052	0.44813	0.679845	0.409983
lcl|NC_013202.1_cds_WP_015762077.1_1053	0.450235	0.720626	0.406544
lcl|NC_013202.1_cds_WP_015762078.1_1054	0.458209	0.69131	0.401655
lcl|NC_013202.1_cds_WP_015762079.1_1055	0.460696	0.600922	0.406199
lcl|NC_013202.1_cds_WP_015762080.1_1056	0.445683	0.709943	0.400832
lcl|NC_013202.1_cds_WP_015762081.1_1057	0.45384	0.64944	0.412539
lcl|NC_013202.1_cds_WP_015762084.1_1059	0.436615	0.661669	0.403165
lcl|NC_013202.1_cds_WP_015762085.1_1060	0.434783	0.707175	0.387848
lcl|NC_013202.1_cds_WP_015762086.1_1061	0.394637	0.662719	0.384269
lcl|NC_013202.1_cds_WP_015762087.1_1062	0.447798	0.689872	0.42067
lcl|NC_013202.1_cds_WP_015762088.1_1063	0.430571	0.704256	0.394696
lcl|NC_013202.1_cds_WP_015762090.1_1064	0.401081	0.604949	0.405953
lcl|NC_013202.1_cds_WP_015762091.1_1066	0.398934	0.474446	0.41918
lcl|NC_013202.1_cds_WP_015762092.1_1067	0.453903	0.67064	0.422564
lcl|NC_013202.1_cds_WP_015762093.1_1068	0.441829	0.708583	0.402259
lcl|NC_013202.1_cds_WP_015762094.1_1069	0.464108	0.665191	0.423037
lcl|NC_013202.1_cds_WP_015762095.1_1070	0.461368	0.660967	0.405879
lcl|NC_013202.1_cds_WP_015762096.1_1071	0.444737	0.775028	0.408463
lcl|NC_013202.1_cds_WP_015762097.1_1072	0.446624	0.627949	0.410447
lcl|NC_013202.1_cds_WP_015762098.1_1073	0.434669	0.631264	0.406763
lcl|NC_013202.1_cds_WP_015762099.1_1074	0.441462	0.754723	0.410902
lcl|NC_013202.1_cds_WP_015762100.1_1075	0.408973	0.569753	0.398291
lcl|NC_013202.1_cds_WP_015762101.1_1076	0.420987	0.624756	0.39647
lcl|NC_013202.1_cds_WP_015762102.1_1077	0.460186	0.77777	0.407125
lcl|NC_013202.1_cds_WP_015762104.1_1078	0.445804	0.673284	0.39762
lcl|NC_013202.1_cds_WP_015762105.1_1079	0.426133	0.669022	0.388991
lcl|NC_013202.1_cds_WP_015762106.1_1080	0.445319	0.736709	0.405233
lcl|NC_013202.1_cds_WP_015762107.1_1081	0.436525	0.64706	0.407373
lcl|NC_013202.1_cds_WP_015762108.1_1082	0.435749	0.62731	0.406974
lcl|NC_013202.1_cds_WP_015762109.1_1083	0.445817	0.731024	0.40537
lcl|NC_013202.1_cds_WP_015762111.1_1084	0.44089	0.75818	0.387818
lcl|NC_013202.1_cds_WP_015762112.1_1085	0.452081	0.727089	0.407293
lcl|NC_013202.1_cds_WP_015762113.1_1086	0.419443	0.626812	0.3719
lcl|NC_013202.1_cds_WP_015762114.1_1087	0.457263	0.715839	0.400144
lcl|NC_013202.1_cds_WP_015762115.1_1088	0.414933	0.63634	0.394355
lcl|NC_013202.1_cds_WP_015762116.1_1089	0.410498	0.582186	0.387752
lcl|NC_013202.1_cds_WP_015762117.1_1090	0.435418	0.712895	0.409439
lcl|NC_013202.1_cds_WP_015762119.1_1092	0.441198	0.735542	0.402777
lcl|NC_013202.1_cds_WP_015762120.1_1093	0.444079	0.631523	0.402306
lcl|NC_013202.1_cds_WP_015762121.1_1094	0.446078	0.731516	0.415833
lcl|NC_013202.1_cds_WP_015762122.1_1095	0.452747	0.638545	0.410326
lcl|NC_013202.1_cds_WP_015762124.1_1097	0.454481	0.657278	0.409455
lcl|NC_013202.1_cds_WP_015762125.1_1098	0.450494	0.724502	0.408613
lcl|NC_013202.1_cds_WP_015762127.1_1100	0.391122	0.556363	0.38472
lcl|NC_013202.1_cds_WP_015762128.1_1102	0.399417	0.452358	0.412031
lcl|NC_013202.1_cds_WP_015762129.1_1103	0.424749	0.616626	0.38667
lcl|NC_013202.1_cds_WP_015762130.1_1104	0.423161	0.719477	0.400578
lcl|NC_013202.1_cds_WP_015762131.1_1105	0.441959	0.639817	0.391234
lcl|NC_013202.1_cds_WP_015762132.1_1106	0.437423	0.691443	0.408816
lcl|NC_013202.1_cds_WP_015762133.1_1107	0.442141	0.73692	0.403711
lcl|NC_013202.1_cds_WP_015762135.1_1108	0.473914	0.753366	0.422596
lcl|NC_013202.1_cds_WP_015762136.1_1109	0.460364	0.746889	0.408183
lcl|NC_013202.1_cds_WP_015762137.1_1110	0.426256	0.721004	0.403134
lcl|NC_013202.1_cds_WP_015762139.1_1112	0.436158	0.65814	0.394826
lcl|NC_013202.1_cds_WP_015762140.1_1113	0.434665	0.615105	0.391711
lcl|NC_013202.1_cds_WP_015762141.1_1114	0.454357	0.689055	0.417889
lcl|NC_013202.1_cds_WP_015762142.1_1115	0.372447	0.525131	0.376201
lcl|NC_013202.1_cds_WP_015762143.1_1116	0.455481	0.710867	0.410955
lcl|NC_013202.1_cds_WP_015762144.1_1117	0.404025	0.82694	0.399412
lcl|NC_013202.1_cds_WP_015762145.1_1118	0.415232	0.67245	0.395945
lcl|NC_013202.1_cds_WP_015762146.1_1119	0.433733	0.66908	0.413902
lcl|NC_013202.1_cds_WP_015762147.1_1120	0.431646	0.656264	0.395817
lcl|NC_013202.1_cds_WP_015762148.1_1121	0.425356	0.723116	0.391413
lcl|NC_013202.1_cds_WP_015762150.1_1122	0.420296	0.64881	0.384882
lcl|NC_013202.1_cds_WP_015762151.1_1123	0.450802	0.707561	0.412094
lcl|NC_013202.1_cds_WP_015762152.1_1124	0.421143	0.680574	0.396196
lcl|NC_013202.1_cds_WP_015762153.1_1125	0.417482	0.692801	0.402821
lcl|NC_013202.1_cds_WP_015762155.1_1127	0.395762	0.587045	0.378425
lcl|NC_013202.1_cds_WP_015762156.1_1128	0.427909	0.743436	0.395447
lcl|NC_013202.1_cds_WP_015762157.1_1129	0.436929	0.736757	0.409717
lcl|NC_013202.1_cds_WP_015762158.1_1130	0.432035	0.662524	0.401115
lcl|NC_013202.1_cds_WP_015762160.1_1132	0.456062	0.718223	0.408901
lcl|NC_013202.1_cds_WP_015762161.1_1133	0.425643	0.665775	0.416131
lcl|NC_013202.1_cds_WP_015762162.1_1134	0.435898	0.492096	0.401023
lcl|NC_013202.1_cds_WP_015762163.1_1135	0.43971	0.62396	0.402904
lcl|NC_013202.1_cds_WP_015762164.1_1136	0.438041	0.613887	0.409875
lcl|NC_013202.1_cds_WP_015762165.1_1137	0.442321	0.684819	0.412298
lcl|NC_013202.1_cds_WP_015762166.1_1138	0.421361	0.597212	0.391983
lcl|NC_013202.1_cds_WP_015762167.1_1139	0.428561	0.594711	0.403582
lcl|NC_013202.1_cds_WP_015762168.1_1140	0.450045	0.703132	0.405613
lcl|NC_013202.1_cds_WP_015762169.1_1141	0.41577	0.630685	0.391591
lcl|NC_013202.1_cds_WP_015762170.1_1142	0.43949	0.744114	0.404022
lcl|NC_013202.1_cds_WP_015762171.1_1143	0.41955	0.611806	0.402978
lcl|NC_013202.1_cds_WP_015762172.1_1144	0.429995	0.712457	0.390759
lcl|NC_013202.1_cds_WP_015762173.1_1145	0.425289	0.668455	0.395923
lcl|NC_013202.1_cds_WP_015762174.1_1146	0.421147	0.612932	0.401407
lcl|NC_013202.1_cds_WP_015762175.1_1147	0.447158	0.675016	0.408652
lcl|NC_013202.1_cds_WP_015762176.1_1148	0.440994	0.714183	0.412729
lcl|NC_013202.1_cds_WP_015762177.1_1149	0.436189	0.806073	0.430801
lcl|NC_013202.1_cds_WP_015762178.1_1150	0.453645	0.755376	0.418821
lcl|NC_013202.1_cds_WP_015762179.1_1151	0.455652	0.671269	0.404467
lcl|NC_013202.1_cds_WP_015762181.1_1153	0.29552	0.13535	0.383725
lcl|NC_013202.1_cds_WP_015762182.1_1154	0.271307	0.0935084	0.38212
lcl|NC_013202.1_cds_WP_015762183.1_1155	0.350433	0.339935	0.385523
lcl|NC_013202.1_cds_WP_015762184.1_1156	0.384807	0.49197	0.396754
lcl|NC_013202.1_cds_WP_015762185.1_1157	0.366878	0.60381	0.393985
lcl|NC_013202.1_cds_WP_015762186.1_1158	0.349303	0.345369	0.394637
lcl|NC_013202.1_cds_WP_015762187.1_1159	0.348066	0.398218	0.386608
lcl|NC_013202.1_cds_WP_015762189.1_1162	0.357158	0.347983	0.384849
lcl|NC_013202.1_cds_WP_015762189.1_1507	0.357158	0.347983	0.384849
lcl|NC_013202.1_cds_WP_015762190.1_1164	0.452693	0.675737	0.409565
lcl|NC_013202.1_cds_WP_015762191.1_1165	0.441038	0.680816	0.406981
lcl|NC_013202.1_cds_WP_015762192.1_1166	0.448554	0.743049	0.402381
lcl|NC_013202.1_cds_WP_015762193.1_1167	0.425909	0.709672	0.390925
lcl|NC_013202.1_cds_WP_015762194.1_1168	0.484969	0.709778	0.437511
lcl|NC_013202.1_cds_WP_015762195.1_1169	0.451597	0.678597	0.419274
lcl|NC_013202.1_cds_WP_015762196.1_1170	0.441764	0.801508	0.416874
lcl|NC_013202.1_cds_WP_015762197.1_1171	0.443375	0.683175	0.40793
lcl|NC_013202.1_cds_WP_015762198.1_1172	0.46456	0.749652	0.42719
lcl|NC_013202.1_cds_WP_015762199.1_1173	0.41617	0.645706	0.39106
lcl|NC_013202.1_cds_WP_015762200.1_1174	0.40654	0.671635	0.389069
lcl|NC_013202.1_cds_WP_015762201.1_1175	0.41308	0.662742	0.388335
lcl|NC_013202.1_cds_WP_015762202.1_1176	0.421063	0.694357	0.403936
lcl|NC_013202.1_cds_WP_015762203.1_1177	0.419806	0.61785	0.4033
lcl|NC_013202.1_cds_WP_015762204.1_1178	0.423177	0.625246	0.394126
lcl|NC_013202.1_cds_WP_015762205.1_1179	0.428446	0.58556	0.397668
lcl|NC_013202.1_cds_WP_015762206.1_1180	0.450978	0.73933	0.407736
lcl|NC_013202.1_cds_WP_015762207.1_1181	0.369117	0.573144	0.382425
lcl|NC_013202.1_cds_WP_015762208.1_1182	0.432404	0.702791	0.398342
lcl|NC_013202.1_cds_WP_015762209.1_1183	0.474914	0.745017	0.430435
lcl|NC_013202.1_cds_WP_015762210.1_1184	0.446881	0.746252	0.410994
lcl|NC_013202.1_cds_WP_015762211.1_1185	0.429114	0.667088	0.408829
lcl|NC_013202.1_cds_WP_015762212.1_1186	0.419017	0.64042	0.391205
lcl|NC_013202.1_cds_WP_015762214.1_1188	0.462211	0.748739	0.412985
lcl|NC_013202.1_cds_WP_015762215.1_1189	0.445342	0.692213	0.406054
lcl|NC_013202.1_cds_WP_015762216.1_1190	0.405027	0.565386	0.395153
lcl|NC_013202.1_cds_WP_015762217.1_1191	0.43779	0.675137	0.402239
lcl|NC_013202.1_cds_WP_015762218.1_1192	0.450563	0.693252	0.418396
lcl|NC_013202.1_cds_WP_015762219.1_1193	0.430362	0.624863	0.391601
lcl|NC_013202.1_cds_WP_015762221.1_1195	0.448385	0.681158	0.411428
lcl|NC_013202.1_cds_WP_015762224.1_1198	0.42802	0.635534	0.387817
lcl|NC_013202.1_cds_WP_015762225.1_1199	0.453949	0.649723	0.403756
lcl|NC_013202.1_cds_WP_015762226.1_1200	0.43818	0.671174	0.399388
lcl|NC_013202.1_cds_WP_015762227.1_1201	0.418822	0.655645	0.390265
lcl|NC_013202.1_cds_WP_015762228.1_1202	0.420054	0.768185	0.386244
lcl|NC_013202.1_cds_WP_015762229.1_1203	0.424007	0.645363	0.388736
lcl|NC_013202.1_cds_WP_015762230.1_1204	0.490444	0.770193	0.436212
lcl|NC_013202.1_cds_WP_015762231.1_1205	0.451114	0.724546	0.401692
lcl|NC_013202.1_cds_WP_015762234.1_1207	0.43285	0.588734	0.402215
lcl|NC_013202.1_cds_WP_015762236.1_1209	0.444617	0.697948	0.40682
lcl|NC_013202.1_cds_WP_015762237.1_1210	0.439462	0.62243	0.412143
lcl|NC_013202.1_cds_WP_015762238.1_1211	0.439996	0.589753	0.407503
lcl|NC_013202.1_cds_WP_015762239.1_1212	0.416388	0.595735	0.393569
lcl|NC_013202.1_cds_WP_015762240.1_1213	0.434419	0.613719	0.40365
lcl|NC_013202.1_cds_WP_015762241.1_1214	0.435682	0.695002	0.402917
lcl|NC_013202.1_cds_WP_015762242.1_1215	0.397605	0.526822	0.396585
lcl|NC_013202.1_cds_WP_015762243.1_1216	0.433078	0.690045	0.405885
lcl|NC_013202.1_cds_WP_015762244.1_1217	0.351988	0.407115	0.387543
lcl|NC_013202.1_cds_WP_015762245.1_1218	0.414466	0.618728	0.400082
lcl|NC_013202.1_cds_WP_015762246.1_1219	0.420682	0.665799	0.393481
lcl|NC_013202.1_cds_WP_015762247.1_1220	0.437228	0.639567	0.421897
lcl|NC_013202.1_cds_WP_015762248.1_1221	0.442709	0.697582	0.41619
lcl|NC_013202.1_cds_WP_015762249.1_1222	0.443206	0.718992	0.416242
lcl|NC_013202.1_cds_WP_015762251.1_1224	0.428596	0.572039	0.395878
lcl|NC_013202.1_cds_WP_015762252.1_1225	0.402921	0.561264	0.391177
lcl|NC_013202.1_cds_WP_015762253.1_1226	0.443264	0.725742	0.411978
lcl|NC_013202.1_cds_WP_015762254.1_1227	0.396777	0.588345	0.392638
lcl|NC_013202.1_cds_WP_015762256.1_1229	0.440903	0.708878	0.404237
lcl|NC_013202.1_cds_WP_015762258.1_1231	0.447297	0.726629	0.404111
lcl|NC_013202.1_cds_WP_015762259.1_1232	0.430765	0.701952	0.395645
lcl|NC_013202.1_cds_WP_015762260.1_1233	0.437232	0.701102	0.399291
lcl|NC_013202.1_cds_WP_015762261.1_1234	0.411237	0.626399	0.385738
lcl|NC_013202.1_cds_WP_015762262.1_1235	0.435303	0.695159	0.402513
lcl|NC_013202.1_cds_WP_015762263.1_1236	0.434099	0.689002	0.395696
lcl|NC_013202.1_cds_WP_015762264.1_1237	0.452782	0.66796	0.417021
lcl|NC_013202.1_cds_WP_015762265.1_1238	0.40054	0.621764	0.392744
lcl|NC_013202.1_cds_WP_015762266.1_1239	0.413966	0.782724	0.396833
lcl|NC_013202.1_cds_WP_015762267.1_1240	0.47377	0.703303	0.413077
lcl|NC_013202.1_cds_WP_015762268.1_1241	0.420678	0.64683	0.389885
lcl|NC_013202.1_cds_WP_015762269.1_1242	0.452364	0.768932	0.407934
lcl|NC_013202.1_cds_WP_015762270.1_1243	0.411601	0.605649	0.392418
lcl|NC_013202.1_cds_WP_015762271.1_1244	0.428966	0.700356	0.406321
lcl|NC_013202.1_cds_WP_015762272.1_1245	0.391003	0.597791	0.387335
lcl|NC_013202.1_cds_WP_015762273.1_1246	0.45978	0.750243	0.410913
lcl|NC_013202.1_cds_WP_015762274.1_1247	0.450528	0.752798	0.403675
lcl|NC_013202.1_cds_WP_015762275.1_1248	0.440824	0.578113	0.417889
lcl|NC_013202.1_cds_WP_015762276.1_1249	0.424535	0.639138	0.39143
lcl|NC_013202.1_cds_WP_015762277.1_1250	0.452572	0.63199	0.420942
lcl|NC_013202.1_cds_WP_015762278.1_1251	0.457399	0.548399	0.414599
lcl|NC_013202.1_cds_WP_015762279.1_1252	0.445589	0.730117	0.409448
lcl|NC_013202.1_cds_WP_015762280.1_1253	0.480394	0.748337	0.429986
lcl|NC_013202.1_cds_WP_015762281.1_1254	0.457515	0.618236	0.422959
lcl|NC_013202.1_cds_WP_015762282.1_1255	0.420814	0.681411	0.411195
lcl|NC_013202.1_cds_WP_015762283.1_1256	0.443011	0.591666	0.387997
lcl|NC_013202.1_cds_WP_015762284.1_1257	0.43451	0.565055	0.394795
lcl|NC_013202.1_cds_WP_015762285.1_1258	0.448056	0.703458	0.404014
lcl|NC_013202.1_cds_WP_015762286.1_1259	0.415417	0.581769	0.398276
lcl|NC_013202.1_cds_WP_015762287.1_1260	0.424733	0.669539	0.395144
lcl|NC_013202.1_cds_WP_015762288.1_1261	0.457562	0.640862	0.41961
lcl|NC_013202.1_cds_WP_015762289.1_1262	0.434954	0.693528	0.399291
lcl|NC_013202.1_cds_WP_015762290.1_1263	0.44131	0.677326	0.396329
lcl|NC_013202.1_cds_WP_015762291.1_1264	0.431731	0.789048	0.399492
lcl|NC_013202.1_cds_WP_015762292.1_1265	0.457857	0.66146	0.421893
lcl|NC_013202.1_cds_WP_015762293.1_1266	0.379276	0.575402	0.398167
lcl|NC_013202.1_cds_WP_015762294.1_1267	0.448252	0.687305	0.395699
lcl|NC_013202.1_cds_WP_015762295.1_1268	0.460336	0.684219	0.406074
lcl|NC_013202.1_cds_WP_015762296.1_1269	0.455447	0.766021	0.415938
lcl|NC_013202.1_cds_WP_015762297.1_1270	0.445697	0.683916	0.407293
lcl|NC_013202.1_cds_WP_015762298.1_1271	0.470693	0.690831	0.41877
lcl|NC_013202.1_cds_WP_015762299.1_1272	0.44153	0.658709	0.392585
lcl|NC_013202.1_cds_WP_015762300.1_1273	0.426367	0.596501	0.392493
lcl|NC_013202.1_cds_WP_015762301.1_1274	0.442875	0.75236	0.413418
lcl|NC_013202.1_cds_WP_015762302.1_1275	0.404854	0.397037	0.404255
lcl|NC_013202.1_cds_WP_015762303.1_1276	0.435963	0.601381	0.405163
lcl|NC_013202.1_cds_WP_015762304.1_1277	0.43365	0.688354	0.405337
lcl|NC_013202.1_cds_WP_015762306.1_1279	0.446801	0.663664	0.403069
lcl|NC_013202.1_cds_WP_015762307.1_1280	0.430363	0.600882	0.38419
lcl|NC_013202.1_cds_WP_015762308.1_1281	0.409737	0.60009	0.39266
lcl|NC_013202.1_cds_WP_015762309.1_1282	0.438715	0.673526	0.406247
lcl|NC_013202.1_cds_WP_015762310.1_1283	0.353941	0.318458	0.392751
lcl|NC_013202.1_cds_WP_015762311.1_1284	0.456538	0.779542	0.413878
lcl|NC_013202.1_cds_WP_015762312.1_1285	0.426822	0.712017	0.400856
lcl|NC_013202.1_cds_WP_015762313.1_1286	0.406043	0.568602	0.399127
lcl|NC_013202.1_cds_WP_015762314.1_1287	0.440575	0.764834	0.410246
lcl|NC_013202.1_cds_WP_015762315.1_1288	0.437931	0.694211	0.387916
lcl|NC_013202.1_cds_WP_015762316.1_1289	0.43877	0.706936	0.406814
lcl|NC_013202.1_cds_WP_015762317.1_1290	0.44738	0.643134	0.405945
lcl|NC_013202.1_cds_WP_015762318.1_1291	0.442409	0.67982	0.415102
lcl|NC_013202.1_cds_WP_015762319.1_1292	0.444081	0.639609	0.39925
lcl|NC_013202.1_cds_WP_015762321.1_1294	0.427453	0.62394	0.401869
lcl|NC_013202.1_cds_WP_015762322.1_1295	0.442411	0.647784	0.405438
lcl|NC_013202.1_cds_WP_015762323.1_1296	0.448145	0.783861	0.428903
lcl|NC_013202.1_cds_WP_015762324.1_1297	0.443378	0.650589	0.399002
lcl|NC_013202.1_cds_WP_015762325.1_1298	0.453615	0.787289	0.41557
lcl|NC_013202.1_cds_WP_015762326.1_1299	0.43591	0.673466	0.391469
lcl|NC_013202.1_cds_WP_015762327.1_1300	0.430623	0.753825	0.400092
lcl|NC_013202.1_cds_WP_015762328.1_1301	0.443316	0.690407	0.403846
lcl|NC_013202.1_cds_WP_015762329.1_1302	0.472653	0.680313	0.416756
lcl|NC_013202.1_cds_WP_015762330.1_1303	0.41303	0.664245	0.387656
lcl|NC_013202.1_cds_WP_015762331.1_1304	0.437697	0.669701	0.396859
lcl|NC_013202.1_cds_WP_015762332.1_1305	0.473085	0.675078	0.410793
lcl|NC_013202.1_cds_WP_015762333.1_1306	0.429208	0.593082	0.395232
lcl|NC_013202.1_cds_WP_015762334.1_1307	0.455306	0.627475	0.412326
lcl|NC_013202.1_cds_WP_015762335.1_1308	0.431248	0.667076	0.391674
lcl|NC_013202.1_cds_WP_015762336.1_1309	0.444258	0.605041	0.393441
lcl|NC_013202.1_cds_WP_015762337.1_1310	0.389003	0.387524	0.389033
lcl|NC_013202.1_cds_WP_015762338.1_1311	0.360809	0.489435	0.376982
lcl|NC_013202.1_cds_WP_015762339.1_1312	0.392173	0.390419	0.414091
lcl|NC_013202.1_cds_WP_015762340.1_1313	0.44319	0.648422	0.403964
lcl|NC_013202.1_cds_WP_015762341.1_1314	0.423209	0.67759	0.391362
lcl|NC_013202.1_cds_WP_015762342.1_1315	0.438588	0.562699	0.403138
lcl|NC_013202.1_cds_WP_015762343.1_1316	0.441949	0.642754	0.406251
lcl|NC_013202.1_cds_WP_015762344.1_1317	0.432003	0.728679	0.39094
lcl|NC_013202.1_cds_WP_015762345.1_1318	0.447487	0.638386	0.405306
lcl|NC_013202.1_cds_WP_015762346.1_1319	0.422864	0.603043	0.392399
lcl|NC_013202.1_cds_WP_015762347.1_1320	0.465613	0.701487	0.410736
lcl|NC_013202.1_cds_WP_015762348.1_1321	0.438297	0.699604	0.397224
lcl|NC_013202.1_cds_WP_015762349.1_1322	0.434178	0.62243	0.40633
lcl|NC_013202.1_cds_WP_015762350.1_1323	0.411076	0.543589	0.38764
lcl|NC_013202.1_cds_WP_015762352.1_1326	0.398775	0.582545	0.405312
lcl|NC_013202.1_cds_WP_015762353.1_1327	0.448832	0.646606	0.397806
lcl|NC_013202.1_cds_WP_015762354.1_1328	0.413235	0.456116	0.405842
lcl|NC_013202.1_cds_WP_015762355.1_1329	0.464567	0.65757	0.423975
lcl|NC_013202.1_cds_WP_015762356.1_1330	0.455547	0.778403	0.416394
lcl|NC_013202.1_cds_WP_015762357.1_1331	0.446506	0.657787	0.398518
lcl|NC_013202.1_cds_WP_015762358.1_1332	0.472739	0.722868	0.413435
lcl|NC_013202.1_cds_WP_015762360.1_1334	0.441292	0.683223	0.413414
lcl|NC_013202.1_cds_WP_015762361.1_1335	0.432571	0.757342	0.401689
lcl|NC_013202.1_cds_WP_015762362.1_1336	0.419583	0.686606	0.394016
lcl|NC_013202.1_cds_WP_015762363.1_1337	0.439021	0.51225	0.414067
lcl|NC_013202.1_cds_WP_015762365.1_1339	0.426387	0.735365	0.401848
lcl|NC_013202.1_cds_WP_015762366.1_1340	0.430162	0.679162	0.394057
lcl|NC_013202.1_cds_WP_015762369.1_1342	0.420919	0.663774	0.399589
lcl|NC_013202.1_cds_WP_015762370.1_1343	0.406405	0.620497	0.410202
lcl|NC_013202.1_cds_WP_015762371.1_1344	0.460988	0.678892	0.402621
lcl|NC_013202.1_cds_WP_015762372.1_1345	0.445162	0.638118	0.38506
lcl|NC_013202.1_cds_WP_015762373.1_1346	0.431504	0.641086	0.400589
lcl|NC_013202.1_cds_WP_015762374.1_1347	0.446681	0.601349	0.400993
lcl|NC_013202.1_cds_WP_015762375.1_1348	0.417382	0.734913	0.393502
lcl|NC_013202.1_cds_WP_015762376.1_1349	0.456164	0.580642	0.408233
lcl|NC_013202.1_cds_WP_015762377.1_1350	0.435737	0.689354	0.40029
lcl|NC_013202.1_cds_WP_015762378.1_1351	0.455688	0.742224	0.400719
lcl|NC_013202.1_cds_WP_015762379.1_1352	0.415269	0.666796	0.396178
lcl|NC_013202.1_cds_WP_015762381.1_1354	0.429337	0.64308	0.40909
lcl|NC_013202.1_cds_WP_015762382.1_1355	0.442198	0.680969	0.397535
lcl|NC_013202.1_cds_WP_015762383.1_1356	0.45448	0.763769	0.41428
lcl|NC_013202.1_cds_WP_015762384.1_1357	0.438381	0.696118	0.410192
lcl|NC_013202.1_cds_WP_015762385.1_1358	0.445748	0.760887	0.405777
lcl|NC_013202.1_cds_WP_015762386.1_1359	0.424656	0.617222	0.401844
lcl|NC_013202.1_cds_WP_015762387.1_1360	0.420986	0.712425	0.408225
lcl|NC_013202.1_cds_WP_015762388.1_1361	0.427631	0.659717	0.398707
lcl|NC_013202.1_cds_WP_015762389.1_1362	0.379135	0.411648	0.399332
lcl|NC_013202.1_cds_WP_015762391.1_1363	0.411756	0.467545	0.405293
lcl|NC_013202.1_cds_WP_015762392.1_1364	0.456703	0.657295	0.394812
lcl|NC_013202.1_cds_WP_015762393.1_1365	0.405733	0.646442	0.398825
lcl|NC_013202.1_cds_WP_015762394.1_1366	0.404125	0.535763	0.397157
lcl|NC_013202.1_cds_WP_015762395.1_1367	0.438041	0.764245	0.409285
lcl|NC_013202.1_cds_WP_015762397.1_1369	0.436173	0.70813	0.403228
lcl|NC_013202.1_cds_WP_015762398.1_1370	0.43647	0.729421	0.403936
lcl|NC_013202.1_cds_WP_015762399.1_1371	0.43196	0.72878	0.400765
lcl|NC_013202.1_cds_WP_015762400.1_1372	0.448241	0.732324	0.398182
lcl|NC_013202.1_cds_WP_015762401.1_1373	0.451939	0.742235	0.409272
lcl|NC_013202.1_cds_WP_015762402.1_1374	0.405616	0.483462	0.393122
lcl|NC_013202.1_cds_WP_015762403.1_1375	0.39037	0.451958	0.391847
lcl|NC_013202.1_cds_WP_015762404.1_1376	0.426408	0.566963	0.394468
lcl|NC_013202.1_cds_WP_015762405.1_1377	0.420939	0.649102	0.38613
lcl|NC_013202.1_cds_WP_015762406.1_1378	0.415648	0.603251	0.39455
lcl|NC_013202.1_cds_WP_015762407.1_1379	0.42614	0.612708	0.407208
lcl|NC_013202.1_cds_WP_015762408.1_1380	0.436474	0.613919	0.410954
lcl|NC_013202.1_cds_WP_015762409.1_1381	0.412483	0.530758	0.388894
lcl|NC_013202.1_cds_WP_015762411.1_1383	0.438301	0.767232	0.403028
lcl|NC_013202.1_cds_WP_015762412.1_1384	0.436444	0.683789	0.397829
lcl|NC_013202.1_cds_WP_015762413.1_1385	0.453493	0.703957	0.406934
lcl|NC_013202.1_cds_WP_015762414.1_1386	0.431385	0.66188	0.403163
lcl|NC_013202.1_cds_WP_015762415.1_1387	0.414466	0.679724	0.385752
lcl|NC_013202.1_cds_WP_015762416.1_1388	0.408638	0.624296	0.394526
lcl|NC_013202.1_cds_WP_015762417.1_1389	0.367264	0.388353	0.390425
lcl|NC_013202.1_cds_WP_015762418.1_1391	0.312589	0.194119	0.383865
lcl|NC_013202.1_cds_WP_015762419.1_1392	0.362381	0.280075	0.388049
lcl|NC_013202.1_cds_WP_015762420.1_1393	0.341854	0.253333	0.372875
lcl|NC_013202.1_cds_WP_015762421.1_1394	0.411577	0.46617	0.402929
lcl|NC_013202.1_cds_WP_015762422.1_1395	0.393331	0.442192	0.397637
lcl|NC_013202.1_cds_WP_015762423.1_1396	0.321014	0.295607	0.38226
lcl|NC_013202.1_cds_WP_015762424.1_1397	0.377073	0.352655	0.396294
lcl|NC_013202.1_cds_WP_015762425.1_1398	0.362005	0.417697	0.390274
lcl|NC_013202.1_cds_WP_015762427.1_1400	0.380322	0.442508	0.394542
lcl|NC_013202.1_cds_WP_015762428.1_1401	0.338213	0.271814	0.38565
lcl|NC_013202.1_cds_WP_015762429.1_1402	0.402795	0.484327	0.404861
lcl|NC_013202.1_cds_WP_015762430.1_1403	0.426124	0.595647	0.408997
lcl|NC_013202.1_cds_WP_015762431.1_1404	0.382291	0.429349	0.382987
lcl|NC_013202.1_cds_WP_015762432.1_1406	0.388864	0.479893	0.39613
lcl|NC_013202.1_cds_WP_015762433.1_1407	0.392966	0.466871	0.388005
lcl|NC_013202.1_cds_WP_015762435.1_1410	0.31295	0.204412	0.384539
lcl|NC_013202.1_cds_WP_015762436.1_1411	0.338806	0.25416	0.384902
lcl|NC_013202.1_cds_WP_015762437.1_1413	0.348872	0.319729	0.387493
lcl|NC_013202.1_cds_WP_015762440.1_1415	0.378295	0.496275	0.388349
lcl|NC_013202.1_cds_WP_015762441.1_1416	0.377169	0.392817	0.397511
lcl|NC_013202.1_cds_WP_015762442.1_1417	0.414563	0.570394	0.398128
lcl|NC_013202.1_cds_WP_015762443.1_1418	0.38358	0.421942	0.407167
lcl|NC_013202.1_cds_WP_015762446.1_1420	0.391617	0.345349	0.406376
lcl|NC_013202.1_cds_WP_015762448.1_1421	0.4348	0.721941	0.404627
lcl|NC_013202.1_cds_WP_015762449.1_1422	0.439731	0.645175	0.396529
lcl|NC_013202.1_cds_WP_015762450.1_1423	0.443723	0.75999	0.407188
lcl|NC_013202.1_cds_WP_015762451.1_1424	0.445012	0.683797	0.397409
lcl|NC_013202.1_cds_WP_015762452.1_1425	0.442645	0.775381	0.413075
lcl|NC_013202.1_cds_WP_015762453.1_1426	0.442126	0.662669	0.410323
lcl|NC_013202.1_cds_WP_015762454.1_1427	0.433058	0.693169	0.391318
lcl|NC_013202.1_cds_WP_015762455.1_1428	0.432649	0.626362	0.406869
lcl|NC_013202.1_cds_WP_015762456.1_1429	0.417804	0.649424	0.401245
lcl|NC_013202.1_cds_WP_015762458.1_1431	0.430385	0.688353	0.403585
lcl|NC_013202.1_cds_WP_015762459.1_1432	0.439408	0.722402	0.401787
lcl|NC_013202.1_cds_WP_015762460.1_1433	0.394935	0.503939	0.384109
lcl|NC_013202.1_cds_WP_015762461.1_1434	0.432202	0.647342	0.385095
lcl|NC_013202.1_cds_WP_015762462.1_1435	0.435795	0.690181	0.404725
lcl|NC_013202.1_cds_WP_015762463.1_1436	0.412769	0.585745	0.393348
lcl|NC_013202.1_cds_WP_015762464.1_1437	0.412289	0.750719	0.397067
lcl|NC_013202.1_cds_WP_015762466.1_1443	0.445671	0.790036	0.418336
lcl|NC_013202.1_cds_WP_015762467.1_1444	0.438423	0.66868	0.401318
lcl|NC_013202.1_cds_WP_015762468.1_1445	0.42588	0.680609	0.407203
lcl|NC_013202.1_cds_WP_015762469.1_1446	0.444862	0.675957	0.400246
lcl|NC_013202.1_cds_WP_015762470.1_1447	0.424565	0.59487	0.41349
lcl|NC_013202.1_cds_WP_015762471.1_1448	0.439454	0.683697	0.402739
lcl|NC_013202.1_cds_WP_015762472.1_1449	0.41112	0.599101	0.392175
lcl|NC_013202.1_cds_WP_015762473.1_1450	0.413785	0.72776	0.389005
lcl|NC_013202.1_cds_WP_015762474.1_1451	0.446389	0.670591	0.399887
lcl|NC_013202.1_cds_WP_015762475.1_1452	0.453491	0.660495	0.395267
lcl|NC_013202.1_cds_WP_015762476.1_1453	0.432422	0.681246	0.391604
lcl|NC_013202.1_cds_WP_015762477.1_1454	0.423224	0.670266	0.398513
lcl|NC_013202.1_cds_WP_015762478.1_1455	0.459734	0.678209	0.406834
lcl|NC_013202.1_cds_WP_015762479.1_1456	0.42122	0.667209	0.38354
lcl|NC_013202.1_cds_WP_015762480.1_1457	0.431774	0.638994	0.387819
lcl|NC_013202.1_cds_WP_015762481.1_1458	0.452437	0.75384	0.416908
lcl|NC_013202.1_cds_WP_015762483.1_1459	0.448312	0.732582	0.404228
lcl|NC_013202.1_cds_WP_015762484.1_1460	0.442281	0.687407	0.403669
lcl|NC_013202.1_cds_WP_015762485.1_1461	0.459114	0.685219	0.406069
lcl|NC_013202.1_cds_WP_015762487.1_1462	0.460895	0.785279	0.411319
lcl|NC_013202.1_cds_WP_015762488.1_1463	0.433153	0.700447	0.389326
lcl|NC_013202.1_cds_WP_015762489.1_1464	0.445032	0.616296	0.403404
lcl|NC_013202.1_cds_WP_015762490.1_1465	0.429664	0.644264	0.39126
lcl|NC_013202.1_cds_WP_015762491.1_1466	0.460044	0.712486	0.407482
lcl|NC_013202.1_cds_WP_015762492.1_1467	0.443039	0.647611	0.398214
lcl|NC_013202.1_cds_WP_015762493.1_1468	0.410925	0.672054	0.38674
lcl|NC_013202.1_cds_WP_015762494.1_1469	0.448508	0.684893	0.403041
lcl|NC_013202.1_cds_WP_015762495.1_1470	0.39757	0.446206	0.401509
lcl|NC_013202.1_cds_WP_015762496.1_1471	0.457021	0.773689	0.416194
lcl|NC_013202.1_cds_WP_015762497.1_1472	0.371636	0.396903	0.390819
lcl|NC_013202.1_cds_WP_015762498.1_1473	0.452975	0.697868	0.403948
lcl|NC_013202.1_cds_WP_015762499.1_1474	0.416042	0.651089	0.397518
lcl|NC_013202.1_cds_WP_015762500.1_1475	0.401883	0.635438	0.39301
lcl|NC_013202.1_cds_WP_015762501.1_1476	0.439516	0.73199	0.405336
lcl|NC_013202.1_cds_WP_015762503.1_1478	0.430387	0.693427	0.404453
lcl|NC_013202.1_cds_WP_015762504.1_1479	0.44715	0.688862	0.406564
lcl|NC_013202.1_cds_WP_015762505.1_1480	0.457857	0.693247	0.400252
lcl|NC_013202.1_cds_WP_015762506.1_1481	0.434419	0.665666	0.397299
lcl|NC_013202.1_cds_WP_015762507.1_1482	0.432157	0.650716	0.397231
lcl|NC_013202.1_cds_WP_015762508.1_1483	0.40809	0.669333	0.378634
lcl|NC_013202.1_cds_WP_015762509.1_1484	0.394791	0.565237	0.417634
lcl|NC_013202.1_cds_WP_015762510.1_1485	0.420399	0.574772	0.426222
lcl|NC_013202.1_cds_WP_015762511.1_1486	0.44257	0.704261	0.414882
lcl|NC_013202.1_cds_WP_015762512.1_1487	0.421068	0.636794	0.38849
lcl|NC_013202.1_cds_WP_015762513.1_1488	0.420329	0.737245	0.408382
lcl|NC_013202.1_cds_WP_015762514.1_1489	0.454157	0.64547	0.406367
lcl|NC_013202.1_cds_WP_015762515.1_1490	0.413644	0.591912	0.402615
lcl|NC_013202.1_cds_WP_015762516.1_1491	0.428735	0.645459	0.40438
lcl|NC_013202.1_cds_WP_015762517.1_1492	0.420334	0.56803	0.407444
lcl|NC_013202.1_cds_WP_015762518.1_1493	0.434418	0.540551	0.402786
lcl|NC_013202.1_cds_WP_015762519.1_1494	0.470311	0.647283	0.420867
lcl|NC_013202.1_cds_WP_015762520.1_1495	0.453035	0.737533	0.41733
lcl|NC_013202.1_cds_WP_015762521.1_1496	0.43519	0.731106	0.403798
lcl|NC_013202.1_cds_WP_015762522.1_1497	0.44433	0.699934	0.40332
lcl|NC_013202.1_cds_WP_015762523.1_1498	0.461525	0.697767	0.411435
lcl|NC_013202.1_cds_WP_015762524.1_1499	0.442528	0.624881	0.405108
lcl|NC_013202.1_cds_WP_015762525.1_1500	0.455716	0.666236	0.414676
lcl|NC_013202.1_cds_WP_015762526.1_1501	0.418578	0.516164	0.404499
lcl|NC_013202.1_cds_WP_015762527.1_1503	0.442287	0.635846	0.419948
lcl|NC_013202.1_cds_WP_015762528.1_1504	0.391603	0.534232	0.388542
lcl|NC_013202.1_cds_WP_015762529.1_1506	0.436713	0.604162	0.400051
lcl|NC_013202.1_cds_WP_015762533.1_1508	0.324852	0.278169	0.380447
lcl|NC_013202.1_cds_WP_015762534.1_1509	0.350231	0.335683	0.395285
lcl|NC_013202.1_cds_WP_015762535.1_1510	0.386637	0.456465	0.400962
lcl|NC_013202.1_cds_WP_015762538.1_1513	0.406114	0.602616	0.400864
lcl|NC_013202.1_cds_WP_015762539.1_1514	0.436785	0.648676	0.398317
lcl|NC_013202.1_cds_WP_015762540.1_1515	0.445698	0.640275	0.40004
lcl|NC_013202.1_cds_WP_015762541.1_1516	0.455757	0.76269	0.413806
lcl|NC_013202.1_cds_WP_015762542.1_1517	0.447356	0.707384	0.404114
lcl|NC_013202.1_cds_WP_015762543.1_1518	0.444274	0.749555	0.4049
lcl|NC_013202.1_cds_WP_015762544.1_1519	0.441531	0.728697	0.404825
lcl|NC_013202.1_cds_WP_015762545.1_1520	0.441897	0.715233	0.402162
lcl|NC_013202.1_cds_WP_015762546.1_1521	0.421228	0.638814	0.393428
lcl|NC_013202.1_cds_WP_015762547.1_1522	0.417367	0.624384	0.407896
lcl|NC_013202.1_cds_WP_015762548.1_1523	0.429384	0.573526	0.398852
lcl|NC_013202.1_cds_WP_015762549.1_1524	0.453251	0.802852	0.415841
lcl|NC_013202.1_cds_WP_015762550.1_1525	0.424749	0.606784	0.39064
lcl|NC_013202.1_cds_WP_015762551.1_1526	0.460987	0.773123	0.429594
lcl|NC_013202.1_cds_WP_015762552.1_1527	0.432363	0.656607	0.394864
lcl|NC_013202.1_cds_WP_015762553.1_1528	0.431359	0.667703	0.40068
lcl|NC_013202.1_cds_WP_015762554.1_1529	0.437201	0.697732	0.394061
lcl|NC_013202.1_cds_WP_015762555.1_1530	0.443967	0.652014	0.395205
lcl|NC_013202.1_cds_WP_015762556.1_1531	0.433289	0.694556	0.402768
lcl|NC_013202.1_cds_WP_015762557.1_1532	0.387685	0.506906	0.378784
lcl|NC_013202.1_cds_WP_015762558.1_1533	0.420037	0.675736	0.405107
lcl|NC_013202.1_cds_WP_015762559.1_1534	0.43908	0.779493	0.406118
lcl|NC_013202.1_cds_WP_015762560.1_1535	0.41746	0.644879	0.403647
lcl|NC_013202.1_cds_WP_015762561.1_1536	0.41832	0.644309	0.400399
lcl|NC_013202.1_cds_WP_015762562.1_1537	0.461977	0.736848	0.422817
lcl|NC_013202.1_cds_WP_015762563.1_1538	0.425901	0.666302	0.388591
lcl|NC_013202.1_cds_WP_015762564.1_1539	0.441938	0.677286	0.397843
lcl|NC_013202.1_cds_WP_015762565.1_1540	0.440751	0.607696	0.414261
lcl|NC_013202.1_cds_WP_015762566.1_1541	0.426115	0.629344	0.395649
lcl|NC_013202.1_cds_WP_015762567.1_1542	0.429967	0.723787	0.409342
lcl|NC_013202.1_cds_WP_015762568.1_1543	0.420061	0.637131	0.395076
lcl|NC_013202.1_cds_WP_015762569.1_1544	0.441192	0.703474	0.414151
lcl|NC_013202.1_cds_WP_015762570.1_1545	0.454838	0.73896	0.41665
lcl|NC_013202.1_cds_WP_015762571.1_1546	0.413399	0.557697	0.399655
lcl|NC_013202.1_cds_WP_015762572.1_1547	0.456185	0.70325	0.404539
lcl|NC_013202.1_cds_WP_015762573.1_1548	0.415737	0.672488	0.398986
lcl|NC_013202.1_cds_WP_015762574.1_1549	0.397561	0.735447	0.399706
lcl|NC_013202.1_cds_WP_015762575.1_1550	0.416752	0.607753	0.398617
lcl|NC_013202.1_cds_WP_015762577.1_1551	0.422634	0.681771	0.390295
lcl|NC_013202.1_cds_WP_015762578.1_1552	0.413499	0.638359	0.39313
lcl|NC_013202.1_cds_WP_015762580.1_1554	0.419317	0.664257	0.390262
lcl|NC_013202.1_cds_WP_015762581.1_1555	0.453353	0.700166	0.406455
lcl|NC_013202.1_cds_WP_015762582.1_1556	0.443882	0.762375	0.405474
lcl|NC_013202.1_cds_WP_015762583.1_1557	0.387684	0.632474	0.376567
lcl|NC_013202.1_cds_WP_015762584.1_1558	0.440727	0.712307	0.407037
lcl|NC_013202.1_cds_WP_015762585.1_1559	0.441934	0.613367	0.395193
lcl|NC_013202.1_cds_WP_015762586.1_1560	0.458993	0.661777	0.418532
lcl|NC_013202.1_cds_WP_015762587.1_1561	0.437943	0.638794	0.399715
lcl|NC_013202.1_cds_WP_015762588.1_1562	0.434746	0.649963	0.39789
lcl|NC_013202.1_cds_WP_015762589.1_1563	0.439986	0.682074	0.404641
lcl|NC_013202.1_cds_WP_015762590.1_1564	0.449507	0.758322	0.41285
lcl|NC_013202.1_cds_WP_015762592.1_1566	0.465762	0.731268	0.420651
lcl|NC_013202.1_cds_WP_015762593.1_1567	0.404814	0.498296	0.400908
lcl|NC_013202.1_cds_WP_015762594.1_1568	0.376762	0.376266	0.381123
lcl|NC_013202.1_cds_WP_015762595.1_1569	0.418843	0.724131	0.398358
lcl|NC_013202.1_cds_WP_015762596.1_1570	0.417748	0.581285	0.40411
lcl|NC_013202.1_cds_WP_015762597.1_1571	0.437376	0.757359	0.40815
lcl|NC_013202.1_cds_WP_015762600.1_1574	0.441686	0.742643	0.4044
lcl|NC_013202.1_cds_WP_015762601.1_1575	0.429815	0.636959	0.398394
lcl|NC_013202.1_cds_WP_015762602.1_1576	0.436319	0.691312	0.399624
lcl|NC_013202.1_cds_WP_015762603.1_1577	0.44774	0.547619	0.414764
lcl|NC_013202.1_cds_WP_015762604.1_1578	0.442316	0.578238	0.400578
lcl|NC_013202.1_cds_WP_015762605.1_1579	0.430589	0.619619	0.397551
lcl|NC_013202.1_cds_WP_015762606.1_1580	0.421257	0.6288	0.388993
lcl|NC_013202.1_cds_WP_015762607.1_1581	0.441717	0.75753	0.410339
lcl|NC_013202.1_cds_WP_015762608.1_1582	0.455738	0.673686	0.403872
lcl|NC_013202.1_cds_WP_015762609.1_1583	0.459988	0.672986	0.412147
lcl|NC_013202.1_cds_WP_015762610.1_1584	0.459323	0.736221	0.421707
lcl|NC_013202.1_cds_WP_015762611.1_1585	0.44594	0.732487	0.396795
lcl|NC_013202.1_cds_WP_015762612.1_1586	0.46195	0.746258	0.408879
lcl|NC_013202.1_cds_WP_015762613.1_1587	0.460698	0.70071	0.415587
lcl|NC_013202.1_cds_WP_015762614.1_1588	0.449274	0.690971	0.414782
lcl|NC_013202.1_cds_WP_015762615.1_1589	0.292844	0.130165	0.380322
lcl|NC_013202.1_cds_WP_015762616.1_1590	0.455566	0.770302	0.412192
lcl|NC_013202.1_cds_WP_015762618.1_1592	0.4369	0.60817	0.395062
lcl|NC_013202.1_cds_WP_015762619.1_1593	0.439552	0.764946	0.415264
lcl|NC_013202.1_cds_WP_015762620.1_1594	0.426975	0.593505	0.399382
lcl|NC_013202.1_cds_WP_015762621.1_1595	0.413862	0.597164	0.387628
lcl|NC_013202.1_cds_WP_015762622.1_1596	0.453486	0.633731	0.421437
lcl|NC_013202.1_cds_WP_015762623.1_1597	0.405792	0.61056	0.393061
lcl|NC_013202.1_cds_WP_015762624.1_1598	0.452961	0.682691	0.410603
lcl|NC_013202.1_cds_WP_015762625.1_1599	0.436302	0.661144	0.408526
lcl|NC_013202.1_cds_WP_015762626.1_1600	0.440442	0.697149	0.400045
lcl|NC_013202.1_cds_WP_015762627.1_1601	0.428049	0.70514	0.405472
lcl|NC_013202.1_cds_WP_015762628.1_1602	0.440246	0.67128	0.403153
lcl|NC_013202.1_cds_WP_015762629.1_1603	0.368319	0.396658	0.39131
lcl|NC_013202.1_cds_WP_015762630.1_1604	0.428761	0.629487	0.406598
lcl|NC_013202.1_cds_WP_015762631.1_1605	0.460865	0.734014	0.40833
lcl|NC_013202.1_cds_WP_015762632.1_1606	0.438099	0.660426	0.396051
lcl|NC_013202.1_cds_WP_015762633.1_1607	0.44368	0.701573	0.402984
lcl|NC_013202.1_cds_WP_015762634.1_1608	0.450295	0.669718	0.404731
lcl|NC_013202.1_cds_WP_015762636.1_1610	0.423814	0.710552	0.403245
lcl|NC_013202.1_cds_WP_015762637.1_1611	0.429857	0.655192	0.402261
lcl|NC_013202.1_cds_WP_015762638.1_1612	0.431826	0.701999	0.402597
lcl|NC_013202.1_cds_WP_015762639.1_1613	0.407753	0.608611	0.373912
lcl|NC_013202.1_cds_WP_015762640.1_1614	0.464627	0.678469	0.418051
lcl|NC_013202.1_cds_WP_015762641.1_1615	0.432811	0.70074	0.391212
lcl|NC_013202.1_cds_WP_015762642.1_1616	0.431079	0.671908	0.406998
lcl|NC_013202.1_cds_WP_015762643.1_1617	0.422624	0.669211	0.383053
lcl|NC_013202.1_cds_WP_015762644.1_1618	0.461906	0.73887	0.411767
lcl|NC_013202.1_cds_WP_015762645.1_1619	0.444781	0.66737	0.414905
lcl|NC_013202.1_cds_WP_015762646.1_1620	0.460124	0.633198	0.41437
lcl|NC_013202.1_cds_WP_015762647.1_1621	0.433204	0.656922	0.389534
lcl|NC_013202.1_cds_WP_015762648.1_1622	0.45509	0.653628	0.415106
lcl|NC_013202.1_cds_WP_015762649.1_1623	0.435813	0.577046	0.393659
lcl|NC_013202.1_cds_WP_015762650.1_1624	0.439156	0.74316	0.409253
lcl|NC_013202.1_cds_WP_015762651.1_1625	0.437391	0.675858	0.414182
lcl|NC_013202.1_cds_WP_015762653.1_1627	0.432283	0.684703	0.403743
lcl|NC_013202.1_cds_WP_015762654.1_1628	0.438936	0.760523	0.415416
lcl|NC_013202.1_cds_WP_015762655.1_1629	0.335342	0.267939	0.396568
lcl|NC_013202.1_cds_WP_015762657.1_1631	0.439691	0.645966	0.404695
lcl|NC_013202.1_cds_WP_015762658.1_1632	0.44205	0.676003	0.40715
lcl|NC_013202.1_cds_WP_015762659.1_1633	0.382988	0.404882	0.4008
lcl|NC_013202.1_cds_WP_015762660.1_1634	0.375422	0.429953	0.389182
lcl|NC_013202.1_cds_WP_015762661.1_1635	0.424628	0.420129	0.410517
lcl|NC_013202.1_cds_WP_015762662.1_1636	0.295437	0.162143	0.37732
lcl|NC_013202.1_cds_WP_015762664.1_1638	0.34807	0.260482	0.377508
lcl|NC_013202.1_cds_WP_015762665.1_1639	0.38896	0.343117	0.399663
lcl|NC_013202.1_cds_WP_015762666.1_1640	0.37469	0.447714	0.403852
lcl|NC_013202.1_cds_WP_015762668.1_1642	0.478646	0.630469	0.415402
lcl|NC_013202.1_cds_WP_015762669.1_1643	0.448714	0.52448	0.391771
lcl|NC_013202.1_cds_WP_015762670.1_1645	0.429054	0.483782	0.420906
lcl|NC_013202.1_cds_WP_015762671.1_1646	0.414478	0.526694	0.396098
lcl|NC_013202.1_cds_WP_015762672.1_1647	0.421332	0.539118	0.417041
lcl|NC_013202.1_cds_WP_015762673.1_1648	0.44033	0.554728	0.418015
lcl|NC_013202.1_cds_WP_015762674.1_1649	0.423039	0.419912	0.418754
lcl|NC_013202.1_cds_WP_015762675.1_1650	0.439968	0.580224	0.415016
lcl|NC_013202.1_cds_WP_015762676.1_1651	0.457707	0.691393	0.41665
lcl|NC_013202.1_cds_WP_015762677.1_1652	0.376757	0.542055	0.381256
lcl|NC_013202.1_cds_WP_015762681.1_1655	0.452159	0.585556	0.403552
lcl|NC_013202.1_cds_WP_015762682.1_1656	0.478619	0.600938	0.444465
lcl|NC_013202.1_cds_WP_015762683.1_1657	0.425622	0.505767	0.416976
lcl|NC_013202.1_cds_WP_015762684.1_1658	0.432352	0.579736	0.409596
lcl|NC_013202.1_cds_WP_015762685.1_1659	0.366683	0.351258	0.392184
lcl|NC_013202.1_cds_WP_015762686.1_1660	0.408714	0.558009	0.39475
lcl|NC_013202.1_cds_WP_015762687.1_1661	0.380702	0.500944	0.386107
lcl|NC_013202.1_cds_WP_015762688.1_1662	0.385818	0.559505	0.391997
lcl|NC_013202.1_cds_WP_015762689.1_1663	0.418919	0.705047	0.393964
lcl|NC_013202.1_cds_WP_015762690.1_1664	0.434587	0.713693	0.407488
lcl|NC_013202.1_cds_WP_015762691.1_1665	0.464736	0.685005	0.430491
lcl|NC_013202.1_cds_WP_015762692.1_1666	0.435599	0.744111	0.423398
lcl|NC_013202.1_cds_WP_015762693.1_1667	0.437006	0.667299	0.410831
lcl|NC_013202.1_cds_WP_015762694.1_1668	0.412656	0.54613	0.406257
lcl|NC_013202.1_cds_WP_015762695.1_1669	0.435572	0.705189	0.411024
lcl|NC_013202.1_cds_WP_015762697.1_1671	0.402571	0.501561	0.392031
lcl|NC_013202.1_cds_WP_015762698.1_1672	0.433886	0.674514	0.403914
lcl|NC_013202.1_cds_WP_015762699.1_1673	0.438159	0.718664	0.398627
lcl|NC_013202.1_cds_WP_015762700.1_1674	0.441451	0.695748	0.398411
lcl|NC_013202.1_cds_WP_015762701.1_1675	0.424646	0.657956	0.393775
lcl|NC_013202.1_cds_WP_015762702.1_1676	0.423499	0.695856	0.389981
lcl|NC_013202.1_cds_WP_015762703.1_1677	0.445908	0.689172	0.408745
lcl|NC_013202.1_cds_WP_015762704.1_1678	0.446613	0.663199	0.411168
lcl|NC_013202.1_cds_WP_015762705.1_1679	0.419232	0.630597	0.393139
lcl|NC_013202.1_cds_WP_015762706.1_1680	0.443063	0.562777	0.423335
lcl|NC_013202.1_cds_WP_015762707.1_1681	0.422805	0.585533	0.400874
lcl|NC_013202.1_cds_WP_015762708.1_1682	0.40885	0.605005	0.385936
lcl|NC_013202.1_cds_WP_015762709.1_1683	0.410198	0.66726	0.388757
lcl|NC_013202.1_cds_WP_015762710.1_1684	0.451457	0.710415	0.410235
lcl|NC_013202.1_cds_WP_015762711.1_1685	0.449428	0.669634	0.409541
lcl|NC_013202.1_cds_WP_015762712.1_1686	0.412115	0.626998	0.40249
lcl|NC_013202.1_cds_WP_015762713.1_1687	0.453212	0.703774	0.414619
lcl|NC_013202.1_cds_WP_015762716.1_1690	0.424206	0.718559	0.401026
lcl|NC_013202.1_cds_WP_015762717.1_1691	0.407485	0.560467	0.378922
lcl|NC_013202.1_cds_WP_015762718.1_1692	0.440539	0.650669	0.40686
lcl|NC_013202.1_cds_WP_015762720.1_1693	0.421603	0.669517	0.396576
lcl|NC_013202.1_cds_WP_015762721.1_1694	0.44942	0.641334	0.399619
lcl|NC_013202.1_cds_WP_015762722.1_1695	0.443411	0.768116	0.4097
lcl|NC_013202.1_cds_WP_015762723.1_1696	0.401943	0.609399	0.370961
lcl|NC_013202.1_cds_WP_015762724.1_1697	0.426089	0.685559	0.40143
lcl|NC_013202.1_cds_WP_015762725.1_1698	0.447392	0.71699	0.405919
lcl|NC_013202.1_cds_WP_015762726.1_1699	0.450201	0.691549	0.400334
lcl|NC_013202.1_cds_WP_015762727.1_1700	0.44954	0.705486	0.406214
lcl|NC_013202.1_cds_WP_015762728.1_1701	0.462143	0.634552	0.411693
lcl|NC_013202.1_cds_WP_015762729.1_1702	0.42759	0.636954	0.409304
lcl|NC_013202.1_cds_WP_015762730.1_1703	0.430772	0.674884	0.401215
lcl|NC_013202.1_cds_WP_015762731.1_1704	0.422763	0.693071	0.406509
lcl|NC_013202.1_cds_WP_015762732.1_1705	0.416763	0.658138	0.403857
lcl|NC_013202.1_cds_WP_015762734.1_1706	0.398889	0.514928	0.396718
lcl|NC_013202.1_cds_WP_015762735.1_1707	0.415889	0.535616	0.381059
lcl|NC_013202.1_cds_WP_015762736.1_1708	0.448029	0.695952	0.412929
lcl|NC_013202.1_cds_WP_015762737.1_1709	0.418676	0.660635	0.409889
lcl|NC_013202.1_cds_WP_015762738.1_1710	0.426803	0.667189	0.404164
lcl|NC_013202.1_cds_WP_015762739.1_1711	0.426975	0.689801	0.385843
lcl|NC_013202.1_cds_WP_015762740.1_1712	0.441486	0.648345	0.396511
lcl|NC_013202.1_cds_WP_015762741.1_1713	0.373175	0.568218	0.385821
lcl|NC_013202.1_cds_WP_015762742.1_1714	0.429887	0.688279	0.394775
lcl|NC_013202.1_cds_WP_015762743.1_1715	0.428892	0.694198	0.408416
lcl|NC_013202.1_cds_WP_015762744.1_1716	0.434463	0.720268	0.401675
lcl|NC_013202.1_cds_WP_015762745.1_1717	0.425774	0.603645	0.391698
lcl|NC_013202.1_cds_WP_015762746.1_1718	0.442933	0.68825	0.411387
lcl|NC_013202.1_cds_WP_015762747.1_1719	0.438756	0.653489	0.400268
lcl|NC_013202.1_cds_WP_015762748.1_1720	0.448236	0.654921	0.400736
lcl|NC_013202.1_cds_WP_015762749.1_1721	0.425323	0.661059	0.406135
lcl|NC_013202.1_cds_WP_015762750.1_1722	0.464511	0.696589	0.417526
lcl|NC_013202.1_cds_WP_015762751.1_1723	0.447512	0.679995	0.393641
lcl|NC_013202.1_cds_WP_015762752.1_1724	0.429571	0.659122	0.394496
lcl|NC_013202.1_cds_WP_015762753.1_1725	0.414852	0.753483	0.396368
lcl|NC_013202.1_cds_WP_015762754.1_1726	0.416187	0.691638	0.392104
lcl|NC_013202.1_cds_WP_015762755.1_1727	0.431855	0.615626	0.399649
lcl|NC_013202.1_cds_WP_015762757.1_1729	0.417388	0.705596	0.394187
lcl|NC_013202.1_cds_WP_015762759.1_1730	0.325383	0.216848	0.384058
lcl|NC_013202.1_cds_WP_015762760.1_1731	0.397631	0.707702	0.412857
lcl|NC_013202.1_cds_WP_015762761.1_1732	0.408987	0.590403	0.374141
lcl|NC_013202.1_cds_WP_015762763.1_1734	0.425095	0.589658	0.417661
lcl|NC_013202.1_cds_WP_015762764.1_1735	0.447114	0.698962	0.405182
lcl|NC_013202.1_cds_WP_015762765.1_1737	0.438568	0.703035	0.399373
lcl|NC_013202.1_cds_WP_015762766.1_1738	0.436879	0.665362	0.407685
lcl|NC_013202.1_cds_WP_015762767.1_1739	0.436613	0.712013	0.417312
lcl|NC_013202.1_cds_WP_015762769.1_1741	0.441402	0.704945	0.406923
lcl|NC_013202.1_cds_WP_015762770.1_1742	0.434141	0.670057	0.408035
lcl|NC_013202.1_cds_WP_015762771.1_1743	0.427926	0.588554	0.37866
lcl|NC_013202.1_cds_WP_015762772.1_1744	0.448335	0.704686	0.404473
lcl|NC_013202.1_cds_WP_015762773.1_1745	0.436935	0.589375	0.406223
lcl|NC_013202.1_cds_WP_015762774.1_1746	0.453339	0.739402	0.406242
lcl|NC_013202.1_cds_WP_015762776.1_1747	0.421452	0.524628	0.406162
lcl|NC_013202.1_cds_WP_015762777.1_1748	0.446199	0.704304	0.412814
lcl|NC_013202.1_cds_WP_015762778.1_1749	0.454745	0.648181	0.403384
lcl|NC_013202.1_cds_WP_015762779.1_1750	0.452471	0.684636	0.410111
lcl|NC_013202.1_cds_WP_015762780.1_1751	0.429638	0.693119	0.410254
lcl|NC_013202.1_cds_WP_015762781.1_1752	0.400315	0.639829	0.382623
lcl|NC_013202.1_cds_WP_015762782.1_1753	0.402652	0.497541	0.400517
lcl|NC_013202.1_cds_WP_015762783.1_1754	0.412919	0.463848	0.390151
lcl|NC_013202.1_cds_WP_015762784.1_1755	0.42571	0.651134	0.401148
lcl|NC_013202.1_cds_WP_015762785.1_1756	0.421707	0.64773	0.399871
lcl|NC_013202.1_cds_WP_015762786.1_1757	0.48339	0.745887	0.437029
lcl|NC_013202.1_cds_WP_015762787.1_1758	0.396053	0.646987	0.385043
lcl|NC_013202.1_cds_WP_015762788.1_1759	0.414617	0.582538	0.400645
lcl|NC_013202.1_cds_WP_015762789.1_1760	0.436274	0.694436	0.40503
lcl|NC_013202.1_cds_WP_015762790.1_1761	0.434363	0.702161	0.414891
lcl|NC_013202.1_cds_WP_015762791.1_1762	0.427987	0.712335	0.39345
lcl|NC_013202.1_cds_WP_015762792.1_1763	0.414325	0.577424	0.394138
lcl|NC_013202.1_cds_WP_015762793.1_1764	0.417105	0.589395	0.406323
lcl|NC_013202.1_cds_WP_015762794.1_1765	0.425111	0.688969	0.397713
lcl|NC_013202.1_cds_WP_015762795.1_1766	0.430366	0.616719	0.406465
lcl|NC_013202.1_cds_WP_015762796.1_1767	0.430693	0.694314	0.406394
lcl|NC_013202.1_cds_WP_015762797.1_1768	0.430565	0.724197	0.406309
lcl|NC_013202.1_cds_WP_015762798.1_1769	0.402137	0.623957	0.386325
lcl|NC_013202.1_cds_WP_015762799.1_1770	0.394698	0.686074	0.385416
lcl|NC_013202.1_cds_WP_015762800.1_1771	0.411568	0.614181	0.40188
lcl|NC_013202.1_cds_WP_015762801.1_1772	0.419613	0.709339	0.400474
lcl|NC_013202.1_cds_WP_015762802.1_1773	0.424018	0.625736	0.405188
lcl|NC_013202.1_cds_WP_015762803.1_1774	0.412964	0.518858	0.399586
lcl|NC_013202.1_cds_WP_015762804.1_1775	0.419125	0.70706	0.401221
lcl|NC_013202.1_cds_WP_015762805.1_1776	0.452551	0.702369	0.420737
lcl|NC_013202.1_cds_WP_015762806.1_1777	0.395763	0.669258	0.39554
lcl|NC_013202.1_cds_WP_015762807.1_1778	0.43955	0.680002	0.409744
lcl|NC_013202.1_cds_WP_015762808.1_1779	0.383305	0.477994	0.396368
lcl|NC_013202.1_cds_WP_015762810.1_1781	0.423727	0.701111	0.38837
lcl|NC_013202.1_cds_WP_015762811.1_1782	0.423836	0.666485	0.39837
lcl|NC_013202.1_cds_WP_015762812.1_1783	0.417087	0.686804	0.390511
lcl|NC_013202.1_cds_WP_015762813.1_1784	0.445529	0.695566	0.400705
lcl|NC_013202.1_cds_WP_015762814.1_1785	0.453506	0.695232	0.410567
lcl|NC_013202.1_cds_WP_015762815.1_1786	0.451231	0.721541	0.410754
lcl|NC_013202.1_cds_WP_015762816.1_1787	0.442404	0.661069	0.405199
lcl|NC_013202.1_cds_WP_015762817.1_1788	0.42024	0.610052	0.404366
lcl|NC_013202.1_cds_WP_015762818.1_1789	0.402054	0.599522	0.394716
lcl|NC_013202.1_cds_WP_015762819.1_1790	0.404911	0.768787	0.387721
lcl|NC_013202.1_cds_WP_015762820.1_1791	0.418391	0.659051	0.387585
lcl|NC_013202.1_cds_WP_015762821.1_1792	0.424963	0.650973	0.383497
lcl|NC_013202.1_cds_WP_015762822.1_1793	0.438592	0.743213	0.400782
lcl|NC_013202.1_cds_WP_015762823.1_1794	0.461143	0.700291	0.405897
lcl|NC_013202.1_cds_WP_015762824.1_1795	0.445862	0.660753	0.409317
lcl|NC_013202.1_cds_WP_015762825.1_1796	0.44325	0.752721	0.414319
lcl|NC_013202.1_cds_WP_015762826.1_1797	0.450713	0.74259	0.407276
lcl|NC_013202.1_cds_WP_015762827.1_1798	0.472166	0.76136	0.423772
lcl|NC_013202.1_cds_WP_015762828.1_1799	0.450833	0.695986	0.420525
lcl|NC_013202.1_cds_WP_015762829.1_1800	0.463415	0.69081	0.403628
lcl|NC_013202.1_cds_WP_015762830.1_1801	0.42135	0.634993	0.395502
lcl|NC_013202.1_cds_WP_015762831.1_1802	0.453934	0.661583	0.403668
lcl|NC_013202.1_cds_WP_015762832.1_1803	0.426249	0.614948	0.404985
lcl|NC_013202.1_cds_WP_015762833.1_1804	0.416208	0.654093	0.397635
lcl|NC_013202.1_cds_WP_015762834.1_1805	0.451076	0.761233	0.40441
lcl|NC_013202.1_cds_WP_015762835.1_1806	0.450162	0.646163	0.401404
lcl|NC_013202.1_cds_WP_015762836.1_1807	0.420724	0.721745	0.392676
lcl|NC_013202.1_cds_WP_015762837.1_1808	0.432052	0.705071	0.406122
lcl|NC_013202.1_cds_WP_015762838.1_1809	0.431515	0.626623	0.396489
lcl|NC_013202.1_cds_WP_015762839.1_1810	0.43612	0.701307	0.402368
lcl|NC_013202.1_cds_WP_015762840.1_1811	0.429884	0.714016	0.389306
lcl|NC_013202.1_cds_WP_015762841.1_1812	0.455696	0.616597	0.405239
lcl|NC_013202.1_cds_WP_015762842.1_1813	0.418259	0.55345	0.401714
lcl|NC_013202.1_cds_WP_015762843.1_1814	0.433067	0.605016	0.402219
lcl|NC_013202.1_cds_WP_015762844.1_1816	0.359375	0.313106	0.39906
lcl|NC_013202.1_cds_WP_015762846.1_1818	0.363946	0.438892	0.383569
lcl|NC_013202.1_cds_WP_015762847.1_1819	0.439865	0.646716	0.411779
lcl|NC_013202.1_cds_WP_015762848.1_1820	0.451653	0.745947	0.416038
lcl|NC_013202.1_cds_WP_015762849.1_1821	0.433578	0.606015	0.416451
lcl|NC_013202.1_cds_WP_015762850.1_1822	0.449582	0.713348	0.405276
lcl|NC_013202.1_cds_WP_015762851.1_1823	0.442209	0.723647	0.407688
lcl|NC_013202.1_cds_WP_015762852.1_1824	0.432977	0.725232	0.396676
lcl|NC_013202.1_cds_WP_015762853.1_1825	0.428068	0.634259	0.399476
lcl|NC_013202.1_cds_WP_015762854.1_1826	0.438992	0.55422	0.416498
lcl|NC_013202.1_cds_WP_015762855.1_1827	0.458146	0.563878	0.423524
lcl|NC_013202.1_cds_WP_015762857.1_1828	0.318109	0.199719	0.38177
lcl|NC_013202.1_cds_WP_015762859.1_1830	0.42389	0.736789	0.382989
lcl|NC_013202.1_cds_WP_015762860.1_1831	0.458837	0.716602	0.425495
lcl|NC_013202.1_cds_WP_015762861.1_1832	0.411021	0.650607	0.393472
lcl|NC_013202.1_cds_WP_015762862.1_1833	0.437416	0.742358	0.405818
lcl|NC_013202.1_cds_WP_015762863.1_1834	0.464313	0.679768	0.410782
lcl|NC_013202.1_cds_WP_015762865.1_1836	0.306274	0.242695	0.376769
lcl|NC_013202.1_cds_WP_015762866.1_1837	0.44424	0.783768	0.406965
lcl|NC_013202.1_cds_WP_015762867.1_1838	0.45865	0.674022	0.414077
lcl|NC_013202.1_cds_WP_015762868.1_1839	0.429981	0.649971	0.398289
lcl|NC_013202.1_cds_WP_015762869.1_1840	0.451449	0.669636	0.41039
lcl|NC_013202.1_cds_WP_015762870.1_1841	0.418763	0.663048	0.393084
lcl|NC_013202.1_cds_WP_015762871.1_1842	0.435067	0.632702	0.415681
lcl|NC_013202.1_cds_WP_015762872.1_1843	0.400076	0.489466	0.392489
lcl|NC_013202.1_cds_WP_015762873.1_1844	0.426768	0.685259	0.400694
lcl|NC_013202.1_cds_WP_015762874.1_1845	0.444626	0.755964	0.415976
lcl|NC_013202.1_cds_WP_015762875.1_1846	0.444622	0.701137	0.397899
lcl|NC_013202.1_cds_WP_015762876.1_1847	0.423022	0.785648	0.408536
lcl|NC_013202.1_cds_WP_015762877.1_1848	0.452411	0.527548	0.413916
lcl|NC_013202.1_cds_WP_015762878.1_1849	0.434546	0.618828	0.416832
lcl|NC_013202.1_cds_WP_015762879.1_1850	0.435943	0.625861	0.399556
lcl|NC_013202.1_cds_WP_015762880.1_1851	0.437888	0.673654	0.405451
lcl|NC_013202.1_cds_WP_015762881.1_1852	0.448468	0.677449	0.415108
lcl|NC_013202.1_cds_WP_015762882.1_1853	0.439481	0.687556	0.402569
lcl|NC_013202.1_cds_WP_015762883.1_1854	0.416779	0.630771	0.390206
lcl|NC_013202.1_cds_WP_015762885.1_1855	0.43538	0.621432	0.388775
lcl|NC_013202.1_cds_WP_015762886.1_1856	0.469176	0.824994	0.427952
lcl|NC_013202.1_cds_WP_015762888.1_1858	0.454456	0.731288	0.414873
lcl|NC_013202.1_cds_WP_015762889.1_1859	0.444944	0.645342	0.398578
lcl|NC_013202.1_cds_WP_015762890.1_1860	0.450084	0.702271	0.402511
lcl|NC_013202.1_cds_WP_015762891.1_1861	0.457106	0.679882	0.414065
lcl|NC_013202.1_cds_WP_015762892.1_1862	0.441178	0.618864	0.41109
lcl|NC_013202.1_cds_WP_015762893.1_1863	0.440183	0.703759	0.409347
lcl|NC_013202.1_cds_WP_015762894.1_1864	0.448685	0.701672	0.41411
lcl|NC_013202.1_cds_WP_015762896.1_1865	0.442005	0.726524	0.405925
lcl|NC_013202.1_cds_WP_015762897.1_1866	0.457341	0.669641	0.429796
lcl|NC_013202.1_cds_WP_015762898.1_1867	0.43883	0.646334	0.411693
lcl|NC_013202.1_cds_WP_015762899.1_1868	0.480236	0.685545	0.42558
lcl|NC_013202.1_cds_WP_015762900.1_1869	0.42594	0.70297	0.392998
lcl|NC_013202.1_cds_WP_015762901.1_1870	0.390801	0.441399	0.397463
lcl|NC_013202.1_cds_WP_015762902.1_1871	0.444227	0.665543	0.411949
lcl|NC_013202.1_cds_WP_015762903.1_1872	0.433522	0.757916	0.419419
lcl|NC_013202.1_cds_WP_015762904.1_1873	0.411867	0.489468	0.409181
lcl|NC_013202.1_cds_WP_015762905.1_1874	0.374879	0.476409	0.389342
lcl|NC_013202.1_cds_WP_015762906.1_1875	0.404078	0.641098	0.418529
lcl|NC_013202.1_cds_WP_015762907.1_1876	0.412642	0.569391	0.401838
lcl|NC_013202.1_cds_WP_015762908.1_1877	0.421956	0.706661	0.39789
lcl|NC_013202.1_cds_WP_015762909.1_1878	0.419571	0.670827	0.395418
lcl|NC_013202.1_cds_WP_015762911.1_1880	0.423925	0.677762	0.399844
lcl|NC_013202.1_cds_WP_015762912.1_1881	0.387032	0.604407	0.392146
lcl|NC_013202.1_cds_WP_015762914.1_1883	0.411013	0.570488	0.397985
lcl|NC_013202.1_cds_WP_015762915.1_1884	0.423569	0.641003	0.397943
lcl|NC_013202.1_cds_WP_015762916.1_1885	0.492125	0.765589	0.444352
lcl|NC_013202.1_cds_WP_015762917.1_1886	0.432547	0.69298	0.403308
lcl|NC_013202.1_cds_WP_015762918.1_1887	0.391488	0.526879	0.395947
lcl|NC_013202.1_cds_WP_015762919.1_1888	0.423144	0.714905	0.405681
lcl|NC_013202.1_cds_WP_015762920.1_1889	0.463586	0.68385	0.420622
lcl|NC_013202.1_cds_WP_015762921.1_1890	0.43377	0.723816	0.403869
lcl|NC_013202.1_cds_WP_015762923.1_1892	0.445946	0.639903	0.420833
lcl|NC_013202.1_cds_WP_015762924.1_1893	0.433192	0.720108	0.395698
lcl|NC_013202.1_cds_WP_015762925.1_1894	0.451739	0.686198	0.408701
lcl|NC_013202.1_cds_WP_015762926.1_1895	0.419371	0.717488	0.38613
lcl|NC_013202.1_cds_WP_015762927.1_1896	0.462522	0.644206	0.4154
lcl|NC_013202.1_cds_WP_015762928.1_1897	0.440304	0.712252	0.394947
lcl|NC_013202.1_cds_WP_015762929.1_1898	0.429342	0.640995	0.401517
lcl|NC_013202.1_cds_WP_015762930.1_1899	0.442118	0.656318	0.387218
lcl|NC_013202.1_cds_WP_015762931.1_1900	0.490173	0.739654	0.447405
lcl|NC_013202.1_cds_WP_015762932.1_1901	0.425809	0.649342	0.393621
lcl|NC_013202.1_cds_WP_015762933.1_1902	0.395571	0.482047	0.388009
lcl|NC_013202.1_cds_WP_015762934.1_1903	0.451192	0.607041	0.398319
lcl|NC_013202.1_cds_WP_015762935.1_1904	0.436182	0.670515	0.407096
lcl|NC_013202.1_cds_WP_015762936.1_1905	0.409546	0.628251	0.387143
lcl|NC_013202.1_cds_WP_015762937.1_1906	0.419988	0.477336	0.407417
lcl|NC_013202.1_cds_WP_015762938.1_1907	0.439903	0.746403	0.399406
lcl|NC_013202.1_cds_WP_015762939.1_1908	0.415828	0.724719	0.393259
lcl|NC_013202.1_cds_WP_015762940.1_1909	0.411324	0.429583	0.404275
lcl|NC_013202.1_cds_WP_015762941.1_1910	0.431955	0.674993	0.392429
lcl|NC_013202.1_cds_WP_015762942.1_1911	0.43383	0.645926	0.389986
lcl|NC_013202.1_cds_WP_015762943.1_1912	0.440531	0.578111	0.409016
lcl|NC_013202.1_cds_WP_015762944.1_1913	0.407601	0.484149	0.412902
lcl|NC_013202.1_cds_WP_015762945.1_1914	0.41267	0.664278	0.39512
lcl|NC_013202.1_cds_WP_015762946.1_1915	0.424732	0.711669	0.403079
lcl|NC_013202.1_cds_WP_015762947.1_1916	0.432171	0.706994	0.408212
lcl|NC_013202.1_cds_WP_015762948.1_1917	0.439427	0.716948	0.408042
lcl|NC_013202.1_cds_WP_015762950.1_1919	0.422448	0.741165	0.403918
lcl|NC_013202.1_cds_WP_015762951.1_1920	0.43048	0.672715	0.399043
lcl|NC_013202.1_cds_WP_015762952.1_1921	0.439267	0.658678	0.400084
lcl|NC_013202.1_cds_WP_015762954.1_1923	0.416933	0.625731	0.406791
lcl|NC_013202.1_cds_WP_015762955.1_1924	0.421133	0.708261	0.399585
lcl|NC_013202.1_cds_WP_015762956.1_1925	0.423209	0.537669	0.393779
lcl|NC_013202.1_cds_WP_015762957.1_1926	0.432353	0.632899	0.388215
lcl|NC_013202.1_cds_WP_015762958.1_1927	0.475549	0.688026	0.420299
lcl|NC_013202.1_cds_WP_015762959.1_1928	0.425255	0.574034	0.396877
lcl|NC_013202.1_cds_WP_015762960.1_1929	0.448175	0.610124	0.409268
lcl|NC_013202.1_cds_WP_015762961.1_1930	0.369429	0.373679	0.394304
lcl|NC_013202.1_cds_WP_015762962.1_1931	0.41147	0.585746	0.392976
lcl|NC_013202.1_cds_WP_015762963.1_1932	0.414786	0.610807	0.394672
lcl|NC_013202.1_cds_WP_015762964.1_1933	0.42679	0.62781	0.396706
lcl|NC_013202.1_cds_WP_015762965.1_1934	0.391317	0.546539	0.386986
lcl|NC_013202.1_cds_WP_015762967.1_1935	0.440308	0.653818	0.423958
lcl|NC_013202.1_cds_WP_015762968.1_1936	0.45706	0.763801	0.41464
lcl|NC_013202.1_cds_WP_015762969.1_1937	0.431129	0.690144	0.39749
lcl|NC_013202.1_cds_WP_015762970.1_1938	0.443604	0.684693	0.403787
lcl|NC_013202.1_cds_WP_015762971.1_1939	0.440463	0.708267	0.398282
lcl|NC_013202.1_cds_WP_015762972.1_1940	0.444839	0.762227	0.413252
lcl|NC_013202.1_cds_WP_015762973.1_1941	0.425021	0.63291	0.397206
lcl|NC_013202.1_cds_WP_015762974.1_1942	0.450611	0.654106	0.395365
lcl|NC_013202.1_cds_WP_015762975.1_1943	0.444304	0.642331	0.403584
lcl|NC_013202.1_cds_WP_015762976.1_1944	0.434218	0.59641	0.399777
lcl|NC_013202.1_cds_WP_015762977.1_1945	0.444404	0.644354	0.40049
lcl|NC_013202.1_cds_WP_015762978.1_1946	0.449371	0.640817	0.398518
lcl|NC_013202.1_cds_WP_015762979.1_1947	0.414912	0.587917	0.386746
lcl|NC_013202.1_cds_WP_015762981.1_1949	0.462749	0.622041	0.408602
lcl|NC_013202.1_cds_WP_015762983.1_1950	0.425477	0.618113	0.396161
lcl|NC_013202.1_cds_WP_015762984.1_1951	0.443899	0.676994	0.403489
lcl|NC_013202.1_cds_WP_015762985.1_1952	0.434412	0.384979	0.410133
lcl|NC_013202.1_cds_WP_015762986.1_1953	0.418884	0.575495	0.385375
[truncated: 1,285 more rows]

## Sheet: Methanocaldococcus jannaschii
Table S2: The gtAI, stAI, and CAI values for the three archaeal organisms used in the study.
gene id	gtAI	CAI	StAI
lcl|NC_000909.1_cds_1019	0.179256	0.567559	0.313419
lcl|NC_000909.1_cds_107	0.233257	0.684912	0.301213
lcl|NC_000909.1_cds_1091	0.161459	0.343261	0.292201
lcl|NC_000909.1_cds_1097	0.161459	0.343261	0.292201
lcl|NC_000909.1_cds_1100	0.223766	0.674469	0.279233
lcl|NC_000909.1_cds_1124	0.273261	0.630753	0.273382
lcl|NC_000909.1_cds_1169	0.223748	0.628216	0.299414
lcl|NC_000909.1_cds_1228	0.184752	0.497382	0.31415
lcl|NC_000909.1_cds_1239	0.25783	0.494112	0.315089
lcl|NC_000909.1_cds_1260	0.267922	0.583471	0.295729
lcl|NC_000909.1_cds_13	0.215914	0.507105	0.289947
lcl|NC_000909.1_cds_131	0.243568	0.544242	0.299545
lcl|NC_000909.1_cds_132	0.264212	0.741182	0.294576
lcl|NC_000909.1_cds_1322	0.178353	0.429959	0.321082
lcl|NC_000909.1_cds_1336	0.18181	0.361407	0.277173
lcl|NC_000909.1_cds_1339	0.281568	0.592259	0.287427
lcl|NC_000909.1_cds_134	0.23907	0.656796	0.29757
lcl|NC_000909.1_cds_1343	0.217051	0.51223	0.308078
lcl|NC_000909.1_cds_1348	0.25926	0.582148	0.280778
lcl|NC_000909.1_cds_1392	0.188352	0.518004	0.333733
lcl|NC_000909.1_cds_1393	0.226047	0.568941	0.29576
lcl|NC_000909.1_cds_1399	0.232306	0.554086	0.297695
lcl|NC_000909.1_cds_1453	0.231285	0.540147	0.307988
lcl|NC_000909.1_cds_1461	0.19063	0.356814	0.288355
lcl|NC_000909.1_cds_1465	0.286324	0.727923	0.273851
lcl|NC_000909.1_cds_1484	0.164282	0.31421	0.293844
lcl|NC_000909.1_cds_15	0.207123	0.577362	0.292481
lcl|NC_000909.1_cds_16	0.253894	0.514675	0.293916
lcl|NC_000909.1_cds_1618	0.263434	0.477426	0.285252
lcl|NC_000909.1_cds_1645	0.208922	0.593272	0.292961
lcl|NC_000909.1_cds_1658	0.250041	0.579318	0.290484
lcl|NC_000909.1_cds_1660	0.252032	0.621374	0.264381
lcl|NC_000909.1_cds_1691	0.212304	0.520752	0.27949
lcl|NC_000909.1_cds_1692	0.253894	0.514675	0.293916
lcl|NC_000909.1_cds_1742	0.275516	0.676173	0.300374
lcl|NC_000909.1_cds_279	0.194896	0.575784	0.294544
lcl|NC_000909.1_cds_3	0.26498	0.642764	0.271061
lcl|NC_000909.1_cds_302	0.179619	0.368293	0.275638
lcl|NC_000909.1_cds_447	0.180252	0.474867	0.320063
lcl|NC_000909.1_cds_543	0.196762	0.477897	0.300824
lcl|NC_000909.1_cds_676	0.199028	0.388126	0.281782
lcl|NC_000909.1_cds_73	0.205224	0.503493	0.324839
lcl|NC_000909.1_cds_741	0.251814	0.675023	0.299411
lcl|NC_000909.1_cds_793	0.26939	0.547366	0.314441
lcl|NC_000909.1_cds_817	0.245419	0.702589	0.300448
lcl|NC_000909.1_cds_824	0.287897	0.565364	0.294391
lcl|NC_000909.1_cds_853	0.272342	0.663183	0.268001
lcl|NC_000909.1_cds_854	0.225673	0.706371	0.310734
lcl|NC_000909.1_cds_855	0.254165	0.742106	0.289443
lcl|NC_000909.1_cds_861	0.223828	0.630946	0.309937
lcl|NC_000909.1_cds_865	0.245193	0.666797	0.302449
lcl|NC_000909.1_cds_866	0.224564	0.653774	0.313994
lcl|NC_000909.1_cds_894	0.226889	0.517224	0.293594
lcl|NC_000909.1_cds_910	0.250007	0.681608	0.288523
lcl|NC_000909.1_cds_913	0.272603	0.532124	0.280043
lcl|NC_000909.1_cds_920	0.187223	0.582496	0.308792
lcl|NC_000909.1_cds_WP_010869494.1_1	0.224448	0.673652	0.284878
lcl|NC_000909.1_cds_WP_010869495.1_2	0.221688	0.622883	0.284571
lcl|NC_000909.1_cds_WP_010869496.1_4	0.264048	0.684659	0.297552
lcl|NC_000909.1_cds_WP_010869497.1_5	0.246468	0.692599	0.293122
lcl|NC_000909.1_cds_WP_010869499.1_7	0.242832	0.651929	0.27939
lcl|NC_000909.1_cds_WP_010869501.1_9	0.212102	0.589654	0.293399
lcl|NC_000909.1_cds_WP_010869502.1_10	0.239986	0.597124	0.29759
lcl|NC_000909.1_cds_WP_010869503.1_11	0.227508	0.601146	0.299783
lcl|NC_000909.1_cds_WP_010869504.1_12	0.250479	0.647464	0.295285
lcl|NC_000909.1_cds_WP_010869506.1_14	0.227971	0.534002	0.3198
lcl|NC_000909.1_cds_WP_010869509.1_17	0.22766	0.494872	0.313063
lcl|NC_000909.1_cds_WP_010869510.1_18	0.280589	0.684455	0.276756
lcl|NC_000909.1_cds_WP_010869511.1_19	0.219575	0.706257	0.307436
lcl|NC_000909.1_cds_WP_010869512.1_20	0.265839	0.687615	0.298068
lcl|NC_000909.1_cds_WP_010869513.1_21	0.248037	0.680652	0.305313
lcl|NC_000909.1_cds_WP_010869514.1_22	0.262349	0.716993	0.285467
lcl|NC_000909.1_cds_WP_010869516.1_24	0.280437	0.718122	0.298533
lcl|NC_000909.1_cds_WP_010869517.1_25	0.255169	0.663234	0.291279
lcl|NC_000909.1_cds_WP_010869519.1_27	0.251299	0.64681	0.280096
lcl|NC_000909.1_cds_WP_010869520.1_28	0.25806	0.591875	0.284196
lcl|NC_000909.1_cds_WP_010869524.1_33	0.238376	0.688858	0.295953
lcl|NC_000909.1_cds_WP_010869525.1_34	0.231806	0.674034	0.305115
lcl|NC_000909.1_cds_WP_010869527.1_36	0.224752	0.569849	0.333813
lcl|NC_000909.1_cds_WP_010869528.1_37	0.22402	0.64808	0.267439
lcl|NC_000909.1_cds_WP_010869529.1_38	0.287279	0.67226	0.315368
lcl|NC_000909.1_cds_WP_010869531.1_40	0.262467	0.758246	0.298601
lcl|NC_000909.1_cds_WP_010869533.1_42	0.282585	0.682287	0.320001
lcl|NC_000909.1_cds_WP_010869534.1_43	0.249813	0.66473	0.289013
lcl|NC_000909.1_cds_WP_010869535.1_44	0.260536	0.682456	0.278962
lcl|NC_000909.1_cds_WP_010869536.1_45	0.258515	0.676032	0.293854
lcl|NC_000909.1_cds_WP_010869537.1_46	0.243323	0.703959	0.289686
lcl|NC_000909.1_cds_WP_010869538.1_47	0.272096	0.658077	0.299721
lcl|NC_000909.1_cds_WP_010869543.1_52	0.221915	0.64	0.318922
lcl|NC_000909.1_cds_WP_010869544.1_53	0.238723	0.656392	0.294045
lcl|NC_000909.1_cds_WP_010869546.1_55	0.237891	0.717202	0.291963
lcl|NC_000909.1_cds_WP_010869547.1_56	0.268908	0.675251	0.303338
lcl|NC_000909.1_cds_WP_010869549.1_58	0.255543	0.587699	0.289086
lcl|NC_000909.1_cds_WP_010869551.1_60	0.202755	0.663103	0.306568
lcl|NC_000909.1_cds_WP_010869552.1_61	0.248685	0.68666	0.300167
lcl|NC_000909.1_cds_WP_010869553.1_62	0.27599	0.780851	0.269561
lcl|NC_000909.1_cds_WP_010869554.1_63	0.252195	0.658431	0.285594
lcl|NC_000909.1_cds_WP_010869555.1_64	0.296757	0.634132	0.304958
lcl|NC_000909.1_cds_WP_010869557.1_66	0.249196	0.718405	0.282357
lcl|NC_000909.1_cds_WP_010869559.1_68	0.228569	0.525416	0.28187
lcl|NC_000909.1_cds_WP_010869560.1_69	0.256363	0.634049	0.289583
lcl|NC_000909.1_cds_WP_010869562.1_71	0.231278	0.708962	0.354558
lcl|NC_000909.1_cds_WP_010869563.1_72	0.260912	0.694323	0.283677
lcl|NC_000909.1_cds_WP_010869566.1_74	0.22394	0.6658	0.282083
lcl|NC_000909.1_cds_WP_010869567.1_75	0.217058	0.598472	0.290971
lcl|NC_000909.1_cds_WP_010869568.1_76	0.215241	0.640467	0.304032
lcl|NC_000909.1_cds_WP_010869569.1_77	0.259965	0.619953	0.285809
lcl|NC_000909.1_cds_WP_010869570.1_78	0.229589	0.657341	0.290252
lcl|NC_000909.1_cds_WP_010869572.1_80	0.228923	0.538944	0.307864
lcl|NC_000909.1_cds_WP_010869573.1_81	0.254306	0.653632	0.301505
lcl|NC_000909.1_cds_WP_010869574.1_82	0.229314	0.657216	0.311554
lcl|NC_000909.1_cds_WP_010869575.1_83	0.255406	0.676995	0.309342
lcl|NC_000909.1_cds_WP_010869576.1_84	0.222059	0.669194	0.29849
lcl|NC_000909.1_cds_WP_010869577.1_85	0.236269	0.679804	0.293084
lcl|NC_000909.1_cds_WP_010869578.1_86	0.249035	0.618611	0.292473
lcl|NC_000909.1_cds_WP_010869579.1_87	0.242824	0.587124	0.29911
lcl|NC_000909.1_cds_WP_010869580.1_88	0.252577	0.681811	0.298631
lcl|NC_000909.1_cds_WP_010869583.1_91	0.265386	0.576519	0.285884
lcl|NC_000909.1_cds_WP_010869584.1_92	0.232189	0.643116	0.291573
lcl|NC_000909.1_cds_WP_010869585.1_93	0.249143	0.725309	0.299605
lcl|NC_000909.1_cds_WP_010869588.1_96	0.286864	0.614832	0.272383
lcl|NC_000909.1_cds_WP_010869589.1_97	0.231576	0.683502	0.295694
lcl|NC_000909.1_cds_WP_010869590.1_98	0.284264	0.777536	0.298779
lcl|NC_000909.1_cds_WP_010869591.1_99	0.224634	0.636482	0.30127
lcl|NC_000909.1_cds_WP_010869593.1_101	0.235693	0.674843	0.319743
lcl|NC_000909.1_cds_WP_010869594.1_102	0.283071	0.661631	0.287252
lcl|NC_000909.1_cds_WP_010869595.1_103	0.225716	0.644535	0.285818
lcl|NC_000909.1_cds_WP_010869597.1_105	0.253452	0.58741	0.29777
lcl|NC_000909.1_cds_WP_010869601.1_109	0.3011	0.699671	0.284579
lcl|NC_000909.1_cds_WP_010869603.1_111	0.256854	0.659443	0.289964
lcl|NC_000909.1_cds_WP_010869604.1_112	0.260002	0.698448	0.307199
lcl|NC_000909.1_cds_WP_010869605.1_113	0.283865	0.713763	0.320282
lcl|NC_000909.1_cds_WP_010869606.1_114	0.27199	0.701302	0.284775
lcl|NC_000909.1_cds_WP_010869607.1_115	0.249766	0.653676	0.301605
lcl|NC_000909.1_cds_WP_010869611.1_119	0.257056	0.672179	0.305099
lcl|NC_000909.1_cds_WP_010869613.1_121	0.266387	0.624544	0.29682
lcl|NC_000909.1_cds_WP_010869614.1_122	0.23497	0.62557	0.31593
lcl|NC_000909.1_cds_WP_010869616.1_124	0.296664	0.73847	0.293519
lcl|NC_000909.1_cds_WP_010869618.1_126	0.261477	0.741928	0.313122
lcl|NC_000909.1_cds_WP_010869619.1_127	0.286633	0.685642	0.299826
lcl|NC_000909.1_cds_WP_010869620.1_128	0.283176	0.740357	0.298412
lcl|NC_000909.1_cds_WP_010869621.1_129	0.287751	0.647258	0.2908
lcl|NC_000909.1_cds_WP_010869624.1_133	0.274643	0.634889	0.265768
lcl|NC_000909.1_cds_WP_010869627.1_136	0.218508	0.653234	0.301817
lcl|NC_000909.1_cds_WP_010869628.1_137	0.235945	0.657201	0.293245
lcl|NC_000909.1_cds_WP_010869629.1_138	0.250685	0.679012	0.298919
lcl|NC_000909.1_cds_WP_010869631.1_140	0.254985	0.69875	0.286535
lcl|NC_000909.1_cds_WP_010869632.1_141	0.247732	0.605568	0.283166
lcl|NC_000909.1_cds_WP_010869633.1_142	0.288443	0.635056	0.298483
lcl|NC_000909.1_cds_WP_010869634.1_143	0.197032	0.453188	0.311176
lcl|NC_000909.1_cds_WP_010869635.1_144	0.263462	0.715444	0.294023
lcl|NC_000909.1_cds_WP_010869636.1_145	0.290718	0.745929	0.281473
lcl|NC_000909.1_cds_WP_010869637.1_146	0.27668	0.752957	0.308507
lcl|NC_000909.1_cds_WP_010869638.1_147	0.254136	0.69149	0.316576
lcl|NC_000909.1_cds_WP_010869639.1_148	0.277898	0.697285	0.294156
lcl|NC_000909.1_cds_WP_010869640.1_149	0.256336	0.660212	0.286039
lcl|NC_000909.1_cds_WP_010869641.1_150	0.241707	0.605569	0.303809
lcl|NC_000909.1_cds_WP_010869643.1_152	0.199891	0.655735	0.295958
lcl|NC_000909.1_cds_WP_010869646.1_154	0.273287	0.677504	0.284252
lcl|NC_000909.1_cds_WP_010869648.1_156	0.248465	0.650863	0.306734
lcl|NC_000909.1_cds_WP_010869649.1_157	0.232467	0.604548	0.316394
lcl|NC_000909.1_cds_WP_010869650.1_158	0.277365	0.594202	0.305454
lcl|NC_000909.1_cds_WP_010869651.1_159	0.242402	0.635306	0.316235
lcl|NC_000909.1_cds_WP_010869653.1_161	0.251109	0.668115	0.284982
lcl|NC_000909.1_cds_WP_010869657.1_165	0.250475	0.671825	0.292823
lcl|NC_000909.1_cds_WP_010869658.1_166	0.248952	0.619092	0.290286
lcl|NC_000909.1_cds_WP_010869659.1_167	0.266933	0.700263	0.307455
lcl|NC_000909.1_cds_WP_010869660.1_168	0.250761	0.632124	0.302971
lcl|NC_000909.1_cds_WP_010869661.1_169	0.271358	0.692126	0.279595
lcl|NC_000909.1_cds_WP_010869662.1_170	0.304536	0.696993	0.299365
lcl|NC_000909.1_cds_WP_010869663.1_171	0.237767	0.772421	0.342399
lcl|NC_000909.1_cds_WP_010869666.1_174	0.21681	0.683119	0.302295
lcl|NC_000909.1_cds_WP_010869667.1_175	0.222813	0.633143	0.307663
lcl|NC_000909.1_cds_WP_010869669.1_177	0.272521	0.704057	0.299388
lcl|NC_000909.1_cds_WP_010869671.1_179	0.292351	0.734708	0.314026
lcl|NC_000909.1_cds_WP_010869672.1_180	0.293133	0.773035	0.305682
lcl|NC_000909.1_cds_WP_010869673.1_181	0.245581	0.705632	0.319738
lcl|NC_000909.1_cds_WP_010869674.1_182	0.28495	0.752335	0.300734
lcl|NC_000909.1_cds_WP_010869675.1_183	0.276378	0.72348	0.327478
lcl|NC_000909.1_cds_WP_010869676.1_184	0.267258	0.688503	0.281499
lcl|NC_000909.1_cds_WP_010869677.1_185	0.284623	0.709779	0.300078
lcl|NC_000909.1_cds_WP_010869681.1_187	0.254247	0.694313	0.294331
lcl|NC_000909.1_cds_WP_010869682.1_188	0.209955	0.745506	0.286461
lcl|NC_000909.1_cds_WP_010869683.1_189	0.232762	0.628882	0.292701
lcl|NC_000909.1_cds_WP_010869684.1_190	0.263592	0.729168	0.304664
lcl|NC_000909.1_cds_WP_010869685.1_191	0.274183	0.723533	0.320799
lcl|NC_000909.1_cds_WP_010869686.1_192	0.251234	0.731361	0.313758
lcl|NC_000909.1_cds_WP_010869687.1_193	0.294089	0.781083	0.304872
lcl|NC_000909.1_cds_WP_010869688.1_194	0.227885	0.745182	0.318621
lcl|NC_000909.1_cds_WP_010869689.1_195	0.249852	0.687725	0.317671
lcl|NC_000909.1_cds_WP_010869690.1_196	0.262836	0.708181	0.319651
lcl|NC_000909.1_cds_WP_010869691.1_197	0.288845	0.714972	0.292995
lcl|NC_000909.1_cds_WP_010869692.1_198	0.223309	0.712622	0.316422
lcl|NC_000909.1_cds_WP_010869693.1_199	0.278891	0.671058	0.284369
lcl|NC_000909.1_cds_WP_010869695.1_201	0.262698	0.765021	0.329379
lcl|NC_000909.1_cds_WP_010869696.1_202	0.256065	0.714098	0.28698
lcl|NC_000909.1_cds_WP_010869698.1_204	0.257479	0.681118	0.286039
lcl|NC_000909.1_cds_WP_010869699.1_205	0.252892	0.667399	0.28291
lcl|NC_000909.1_cds_WP_010869701.1_207	0.266727	0.735597	0.298095
lcl|NC_000909.1_cds_WP_010869702.1_208	0.26166	0.698893	0.295604
lcl|NC_000909.1_cds_WP_010869703.1_209	0.213438	0.652792	0.287729
lcl|NC_000909.1_cds_WP_010869705.1_211	0.272999	0.723553	0.30183
lcl|NC_000909.1_cds_WP_010869706.1_212	0.265072	0.635533	0.300633
lcl|NC_000909.1_cds_WP_010869707.1_213	0.272665	0.705331	0.291497
lcl|NC_000909.1_cds_WP_010869708.1_214	0.25198	0.591693	0.3239
lcl|NC_000909.1_cds_WP_010869709.1_215	0.215019	0.694979	0.281076
lcl|NC_000909.1_cds_WP_010869710.1_216	0.269382	0.738424	0.317684
lcl|NC_000909.1_cds_WP_010869712.1_218	0.241663	0.703031	0.313445
lcl|NC_000909.1_cds_WP_010869714.1_220	0.246221	0.628466	0.299785
lcl|NC_000909.1_cds_WP_010869715.1_221	0.257368	0.645494	0.30717
lcl|NC_000909.1_cds_WP_010869717.1_223	0.259562	0.573621	0.286233
lcl|NC_000909.1_cds_WP_010869718.1_224	0.243955	0.628134	0.307673
lcl|NC_000909.1_cds_WP_010869719.1_225	0.258497	0.690892	0.378452
lcl|NC_000909.1_cds_WP_010869723.1_229	0.295845	0.610793	0.271042
lcl|NC_000909.1_cds_WP_010869726.1_232	0.257383	0.72885	0.299142
lcl|NC_000909.1_cds_WP_010869727.1_233	0.235586	0.717962	0.304853
lcl|NC_000909.1_cds_WP_010869728.1_234	0.221212	0.548087	0.3257
lcl|NC_000909.1_cds_WP_010869729.1_235	0.262896	0.694258	0.28697
lcl|NC_000909.1_cds_WP_010869731.1_237	0.271148	0.662679	0.273449
lcl|NC_000909.1_cds_WP_010869733.1_239	0.229921	0.737828	0.324823
lcl|NC_000909.1_cds_WP_010869735.1_241	0.270165	0.69586	0.311795
lcl|NC_000909.1_cds_WP_010869736.1_242	0.242064	0.669038	0.285563
lcl|NC_000909.1_cds_WP_010869738.1_244	0.216225	0.690678	0.304743
lcl|NC_000909.1_cds_WP_010869739.1_245	0.253851	0.656124	0.304139
lcl|NC_000909.1_cds_WP_010869741.1_247	0.263746	0.648102	0.334866
lcl|NC_000909.1_cds_WP_010869742.1_248	0.265972	0.604967	0.299838
lcl|NC_000909.1_cds_WP_010869744.1_250	0.237867	0.659633	0.282994
lcl|NC_000909.1_cds_WP_010869747.1_253	0.223777	0.662011	0.308848
lcl|NC_000909.1_cds_WP_010869749.1_255	0.279803	0.697425	0.289892
lcl|NC_000909.1_cds_WP_010869751.1_257	0.253633	0.65129	0.287792
lcl|NC_000909.1_cds_WP_010869752.1_258	0.223938	0.630505	0.290421
lcl|NC_000909.1_cds_WP_010869753.1_259	0.258886	0.676619	0.284645
lcl|NC_000909.1_cds_WP_010869754.1_262	0.236956	0.669748	0.302598
lcl|NC_000909.1_cds_WP_010869756.1_264	0.258598	0.658742	0.298968
lcl|NC_000909.1_cds_WP_010869759.1_267	0.253427	0.69293	0.303679
lcl|NC_000909.1_cds_WP_010869760.1_268	0.29924	0.719021	0.300494
lcl|NC_000909.1_cds_WP_010869761.1_269	0.270141	0.650131	0.278745
lcl|NC_000909.1_cds_WP_010869765.1_273	0.292915	0.762581	0.30174
lcl|NC_000909.1_cds_WP_010869766.1_274	0.279434	0.790037	0.279823
lcl|NC_000909.1_cds_WP_010869768.1_277	0.275883	0.699037	0.283188
lcl|NC_000909.1_cds_WP_010869773.1_283	0.257647	0.611231	0.269239
lcl|NC_000909.1_cds_WP_010869775.1_285	0.256548	0.667993	0.296981
lcl|NC_000909.1_cds_WP_010869778.1_288	0.256629	0.74797	0.35924
lcl|NC_000909.1_cds_WP_010869779.1_289	0.258579	0.681194	0.287265
lcl|NC_000909.1_cds_WP_010869781.1_291	0.285491	0.674049	0.292925
lcl|NC_000909.1_cds_WP_010869783.1_293	0.284843	0.749893	0.32411
lcl|NC_000909.1_cds_WP_010869784.1_294	0.253284	0.560772	0.325143
lcl|NC_000909.1_cds_WP_010869785.1_295	0.219572	0.556863	0.297875
lcl|NC_000909.1_cds_WP_010869786.1_296	0.277889	0.569154	0.288245
lcl|NC_000909.1_cds_WP_010869787.1_297	0.306657	0.605708	0.297395
lcl|NC_000909.1_cds_WP_010869788.1_298	0.264584	0.685645	0.289666
lcl|NC_000909.1_cds_WP_010869789.1_299	0.296121	0.738001	0.316262
lcl|NC_000909.1_cds_WP_010869792.1_303	0.235632	0.670773	0.292465
lcl|NC_000909.1_cds_WP_010869793.1_304	0.28079	0.72164	0.286108
lcl|NC_000909.1_cds_WP_010869795.1_306	0.275317	0.68633	0.313126
lcl|NC_000909.1_cds_WP_010869796.1_307	0.29644	0.634685	0.267189
lcl|NC_000909.1_cds_WP_010869798.1_309	0.252895	0.699489	0.287232
lcl|NC_000909.1_cds_WP_010869799.1_310	0.269364	0.601674	0.293376
lcl|NC_000909.1_cds_WP_010869800.1_311	0.238976	0.707994	0.321002
lcl|NC_000909.1_cds_WP_010869802.1_313	0.243535	0.659684	0.270506
lcl|NC_000909.1_cds_WP_010869803.1_314	0.251251	0.614342	0.27508
lcl|NC_000909.1_cds_WP_010869805.1_316	0.256289	0.656933	0.333728
lcl|NC_000909.1_cds_WP_010869806.1_317	0.300359	0.732266	0.325646
lcl|NC_000909.1_cds_WP_010869807.1_318	0.281681	0.646184	0.294344
lcl|NC_000909.1_cds_WP_010869808.1_319	0.243687	0.626357	0.31723
lcl|NC_000909.1_cds_WP_010869809.1_320	0.302652	0.739664	0.291658
lcl|NC_000909.1_cds_WP_010869810.1_321	0.269935	0.624926	0.317012
lcl|NC_000909.1_cds_WP_010869811.1_322	0.245821	0.701419	0.288191
lcl|NC_000909.1_cds_WP_010869812.1_323	0.275581	0.646839	0.282044
lcl|NC_000909.1_cds_WP_010869814.1_325	0.278261	0.681886	0.308767
lcl|NC_000909.1_cds_WP_010869815.1_326	0.238475	0.652277	0.288821
lcl|NC_000909.1_cds_WP_010869816.1_327	0.255536	0.750871	0.300146
lcl|NC_000909.1_cds_WP_010869817.1_328	0.21904	0.73503	0.286868
lcl|NC_000909.1_cds_WP_010869819.1_330	0.279738	0.612596	0.287147
lcl|NC_000909.1_cds_WP_010869821.1_332	0.280823	0.656306	0.330223
lcl|NC_000909.1_cds_WP_010869822.1_333	0.254239	0.68411	0.297431
lcl|NC_000909.1_cds_WP_010869824.1_335	0.291826	0.785585	0.276456
lcl|NC_000909.1_cds_WP_010869825.1_336	0.239296	0.598869	0.32785
lcl|NC_000909.1_cds_WP_010869826.1_337	0.26094	0.565792	0.321927
lcl|NC_000909.1_cds_WP_010869828.1_339	0.222659	0.577301	0.325177
lcl|NC_000909.1_cds_WP_010869829.1_340	0.2409	0.59407	0.302876
lcl|NC_000909.1_cds_WP_010869830.1_341	0.284392	0.518493	0.27867
lcl|NC_000909.1_cds_WP_010869831.1_342	0.224675	0.527541	0.31849
lcl|NC_000909.1_cds_WP_010869832.1_343	0.26016	0.662785	0.326447
lcl|NC_000909.1_cds_WP_010869833.1_344	0.228843	0.498153	0.302346
lcl|NC_000909.1_cds_WP_010869834.1_345	0.259286	0.579246	0.291678
lcl|NC_000909.1_cds_WP_010869836.1_347	0.275144	0.595848	0.335
lcl|NC_000909.1_cds_WP_010869837.1_348	0.22257	0.576306	0.297159
lcl|NC_000909.1_cds_WP_010869838.1_349	0.227649	0.55783	0.294311
lcl|NC_000909.1_cds_WP_010869839.1_350	0.244669	0.613764	0.316139
lcl|NC_000909.1_cds_WP_010869840.1_351	0.254107	0.518814	0.301206
lcl|NC_000909.1_cds_WP_010869841.1_352	0.268798	0.661817	0.315365
lcl|NC_000909.1_cds_WP_010869842.1_353	0.30078	0.620119	0.30201
lcl|NC_000909.1_cds_WP_010869843.1_354	0.296222	0.615863	0.2801
lcl|NC_000909.1_cds_WP_010869844.1_355	0.309936	0.630231	0.282419
lcl|NC_000909.1_cds_WP_010869845.1_356	0.283275	0.680327	0.280617
lcl|NC_000909.1_cds_WP_010869846.1_357	0.266617	0.672003	0.284626
lcl|NC_000909.1_cds_WP_010869848.1_359	0.190832	0.660689	0.31006
lcl|NC_000909.1_cds_WP_010869849.1_360	0.19672	0.675762	0.302147
lcl|NC_000909.1_cds_WP_010869850.1_361	0.206381	0.555022	0.29361
lcl|NC_000909.1_cds_WP_010869851.1_362	0.184555	0.552657	0.322665
lcl|NC_000909.1_cds_WP_010869854.1_364	0.196682	0.622444	0.293309
lcl|NC_000909.1_cds_WP_010869855.1_365	0.217169	0.578028	0.296727
lcl|NC_000909.1_cds_WP_010869856.1_367	0.227328	0.643155	0.294373
lcl|NC_000909.1_cds_WP_010869857.1_368	0.229665	0.712231	0.281522
lcl|NC_000909.1_cds_WP_010869859.1_370	0.23819	0.585821	0.276475
lcl|NC_000909.1_cds_WP_010869860.1_372	0.306592	0.671534	0.28302
lcl|NC_000909.1_cds_WP_010869861.1_373	0.295308	0.716131	0.317387
lcl|NC_000909.1_cds_WP_010869862.1_374	0.229384	0.621333	0.291836
lcl|NC_000909.1_cds_WP_010869864.1_376	0.18812	0.516091	0.301463
lcl|NC_000909.1_cds_WP_010869866.1_378	0.17764	0.538602	0.290075
lcl|NC_000909.1_cds_WP_010869867.1_379	0.25935	0.620958	0.317437
lcl|NC_000909.1_cds_WP_010869868.1_380	0.247395	0.673989	0.31182
lcl|NC_000909.1_cds_WP_010869869.1_381	0.255052	0.663641	0.305773
lcl|NC_000909.1_cds_WP_010869870.1_382	0.273151	0.775209	0.284275
lcl|NC_000909.1_cds_WP_010869871.1_383	0.222088	0.686431	0.309662
lcl|NC_000909.1_cds_WP_010869872.1_384	0.289441	0.715902	0.310939
lcl|NC_000909.1_cds_WP_010869875.1_387	0.269482	0.670433	0.293396
lcl|NC_000909.1_cds_WP_010869876.1_388	0.221409	0.656199	0.301784
lcl|NC_000909.1_cds_WP_010869877.1_389	0.219958	0.59117	0.295932
lcl|NC_000909.1_cds_WP_010869880.1_392	0.270522	0.648502	0.297382
lcl|NC_000909.1_cds_WP_010869882.1_394	0.263732	0.607779	0.301455
lcl|NC_000909.1_cds_WP_010869884.1_396	0.26833	0.619312	0.277757
lcl|NC_000909.1_cds_WP_010869886.1_398	0.215327	0.623436	0.321441
lcl|NC_000909.1_cds_WP_010869888.1_400	0.23675	0.691848	0.30522
lcl|NC_000909.1_cds_WP_010869889.1_401	0.261023	0.725023	0.274235
lcl|NC_000909.1_cds_WP_010869891.1_403	0.236276	0.58659	0.296708
lcl|NC_000909.1_cds_WP_010869892.1_404	0.228421	0.668161	0.33083
lcl|NC_000909.1_cds_WP_010869893.1_405	0.280191	0.763509	0.342181
lcl|NC_000909.1_cds_WP_010869894.1_406	0.298608	0.59363	0.2873
lcl|NC_000909.1_cds_WP_010869895.1_407	0.259073	0.761962	0.31363
lcl|NC_000909.1_cds_WP_010869896.1_408	0.23363	0.661553	0.303508
lcl|NC_000909.1_cds_WP_010869897.1_409	0.266478	0.66049	0.279395
lcl|NC_000909.1_cds_WP_010869899.1_411	0.26233	0.648812	0.294773
lcl|NC_000909.1_cds_WP_010869900.1_412	0.324386	0.771936	0.309664
lcl|NC_000909.1_cds_WP_010869901.1_413	0.301976	0.714681	0.337204
lcl|NC_000909.1_cds_WP_010869902.1_414	0.266949	0.662892	0.29218
lcl|NC_000909.1_cds_WP_010869903.1_416	0.253416	0.641097	0.319017
lcl|NC_000909.1_cds_WP_010869907.1_420	0.270423	0.642096	0.302985
lcl|NC_000909.1_cds_WP_010869908.1_421	0.288644	0.650804	0.27418
lcl|NC_000909.1_cds_WP_010869909.1_422	0.26794	0.595403	0.289711
lcl|NC_000909.1_cds_WP_010869910.1_423	0.246814	0.680134	0.288456
lcl|NC_000909.1_cds_WP_010869913.1_426	0.252045	0.66817	0.301166
lcl|NC_000909.1_cds_WP_010869914.1_427	0.238844	0.508365	0.2966
lcl|NC_000909.1_cds_WP_010869915.1_428	0.260085	0.615961	0.298014
lcl|NC_000909.1_cds_WP_010869916.1_429	0.259867	0.638358	0.300733
lcl|NC_000909.1_cds_WP_010869918.1_431	0.240007	0.61585	0.273163
lcl|NC_000909.1_cds_WP_010869919.1_432	0.250714	0.610266	0.264385
lcl|NC_000909.1_cds_WP_010869920.1_433	0.25914	0.756568	0.280349
lcl|NC_000909.1_cds_WP_010869922.1_435	0.242936	0.548001	0.322307
lcl|NC_000909.1_cds_WP_010869925.1_437	0.266404	0.68235	0.315501
lcl|NC_000909.1_cds_WP_010869927.1_439	0.26815	0.684543	0.293525
lcl|NC_000909.1_cds_WP_010869928.1_440	0.242535	0.714044	0.306836
lcl|NC_000909.1_cds_WP_010869929.1_441	0.292359	0.707875	0.268062
lcl|NC_000909.1_cds_WP_010869931.1_443	0.238229	0.704857	0.287294
lcl|NC_000909.1_cds_WP_010869932.1_444	0.278668	0.77218	0.269332
lcl|NC_000909.1_cds_WP_010869933.1_445	0.261541	0.66951	0.295021
lcl|NC_000909.1_cds_WP_010869934.1_446	0.264981	0.621159	0.30367
lcl|NC_000909.1_cds_WP_010869936.1_448	0.249708	0.643943	0.298991
lcl|NC_000909.1_cds_WP_010869937.1_449	0.256003	0.655311	0.28395
lcl|NC_000909.1_cds_WP_010869940.1_452	0.258982	0.626763	0.272019
lcl|NC_000909.1_cds_WP_010869941.1_453	0.242452	0.648932	0.289484
lcl|NC_000909.1_cds_WP_010869943.1_455	0.248997	0.660663	0.293488
lcl|NC_000909.1_cds_WP_010869944.1_456	0.236577	0.699871	0.31977
lcl|NC_000909.1_cds_WP_010869946.1_458	0.267344	0.700889	0.30669
lcl|NC_000909.1_cds_WP_010869948.1_460	0.243042	0.626714	0.281836
lcl|NC_000909.1_cds_WP_010869949.1_461	0.264441	0.637283	0.28926
lcl|NC_000909.1_cds_WP_010869951.1_463	0.280602	0.635017	0.276318
lcl|NC_000909.1_cds_WP_010869952.1_464	0.252016	0.67064	0.302948
lcl|NC_000909.1_cds_WP_010869953.1_465	0.245759	0.693793	0.286613
lcl|NC_000909.1_cds_WP_010869954.1_466	0.266792	0.690886	0.30006
lcl|NC_000909.1_cds_WP_010869955.1_467	0.251918	0.58733	0.274088
lcl|NC_000909.1_cds_WP_010869956.1_468	0.244977	0.689657	0.292759
lcl|NC_000909.1_cds_WP_010869957.1_469	0.286579	0.729967	0.281934
lcl|NC_000909.1_cds_WP_010869959.1_471	0.284344	0.780951	0.336474
lcl|NC_000909.1_cds_WP_010869961.1_473	0.2832	0.721665	0.314257
lcl|NC_000909.1_cds_WP_010869962.1_474	0.324362	0.76291	0.370633
lcl|NC_000909.1_cds_WP_010869964.1_476	0.197856	0.480044	0.329803
lcl|NC_000909.1_cds_WP_010869965.1_477	0.289449	0.752594	0.314002
lcl|NC_000909.1_cds_WP_010869966.1_478	0.261211	0.712926	0.297152
lcl|NC_000909.1_cds_WP_010869967.1_479	0.260823	0.753519	0.314625
lcl|NC_000909.1_cds_WP_010869968.1_480	0.289075	0.735371	0.308895
lcl|NC_000909.1_cds_WP_010869969.1_481	0.264094	0.726103	0.320117
lcl|NC_000909.1_cds_WP_010869970.1_482	0.243672	0.688343	0.292797
lcl|NC_000909.1_cds_WP_010869971.1_483	0.249088	0.648106	0.315918
lcl|NC_000909.1_cds_WP_010869972.1_484	0.271317	0.709518	0.308762
lcl|NC_000909.1_cds_WP_010869973.1_485	0.224287	0.715067	0.332494
lcl|NC_000909.1_cds_WP_010869975.1_487	0.251299	0.729542	0.325467
lcl|NC_000909.1_cds_WP_010869976.1_488	0.237502	0.709268	0.300708
lcl|NC_000909.1_cds_WP_010869977.1_489	0.27081	0.718655	0.318884
lcl|NC_000909.1_cds_WP_010869978.1_490	0.248905	0.716017	0.309803
lcl|NC_000909.1_cds_WP_010869979.1_492	0.258353	0.645622	0.29909
lcl|NC_000909.1_cds_WP_010869981.1_494	0.262102	0.61842	0.292012
lcl|NC_000909.1_cds_WP_010869983.1_496	0.2731	0.736321	0.281013
lcl|NC_000909.1_cds_WP_010869986.1_499	0.223843	0.675597	0.295717
lcl|NC_000909.1_cds_WP_010869988.1_501	0.262256	0.720805	0.312187
lcl|NC_000909.1_cds_WP_010869991.1_504	0.245851	0.670006	0.289429
lcl|NC_000909.1_cds_WP_010869993.1_506	0.294064	0.63271	0.29353
lcl|NC_000909.1_cds_WP_010869994.1_507	0.278351	0.654654	0.294622
lcl|NC_000909.1_cds_WP_010869997.1_510	0.233215	0.607108	0.293495
lcl|NC_000909.1_cds_WP_010869998.1_511	0.259994	0.71377	0.282196
lcl|NC_000909.1_cds_WP_010870000.1_513	0.257503	0.679456	0.30294
lcl|NC_000909.1_cds_WP_010870002.1_515	0.262803	0.625627	0.297884
lcl|NC_000909.1_cds_WP_010870005.1_518	0.238447	0.71095	0.297559
lcl|NC_000909.1_cds_WP_010870006.1_519	0.295179	0.704779	0.282341
lcl|NC_000909.1_cds_WP_010870009.1_522	0.307894	0.823115	0.330912
lcl|NC_000909.1_cds_WP_010870010.1_523	0.266326	0.658368	0.32542
lcl|NC_000909.1_cds_WP_010870012.1_527	0.24327	0.581639	0.280343
lcl|NC_000909.1_cds_WP_010870015.1_530	0.244117	0.678908	0.293726
lcl|NC_000909.1_cds_WP_010870016.1_531	0.271887	0.696738	0.28219
lcl|NC_000909.1_cds_WP_010870019.1_534	0.247057	0.703528	0.29496
lcl|NC_000909.1_cds_WP_010870021.1_536	0.242076	0.564886	0.272378
lcl|NC_000909.1_cds_WP_010870022.1_537	0.310741	0.564267	0.299851
lcl|NC_000909.1_cds_WP_010870025.1_540	0.260233	0.569911	0.304178
lcl|NC_000909.1_cds_WP_010870029.1_544	0.239663	0.604696	0.289225
lcl|NC_000909.1_cds_WP_010870031.1_546	0.277229	0.588768	0.293213
lcl|NC_000909.1_cds_WP_010870032.1_547	0.224533	0.532539	0.28536
lcl|NC_000909.1_cds_WP_010870034.1_549	0.262605	0.63831	0.319556
lcl|NC_000909.1_cds_WP_010870036.1_551	0.262981	0.703461	0.301829
lcl|NC_000909.1_cds_WP_010870037.1_552	0.231094	0.687	0.291747
lcl|NC_000909.1_cds_WP_010870038.1_553	0.275669	0.640341	0.289303
lcl|NC_000909.1_cds_WP_010870039.1_554	0.298158	0.724186	0.278522
lcl|NC_000909.1_cds_WP_010870041.1_556	0.237876	0.670947	0.292839
lcl|NC_000909.1_cds_WP_010870042.1_557	0.265204	0.683569	0.297443
lcl|NC_000909.1_cds_WP_010870043.1_558	0.24624	0.690014	0.309355
lcl|NC_000909.1_cds_WP_010870044.1_559	0.218599	0.69713	0.286567
lcl|NC_000909.1_cds_WP_010870045.1_560	0.230356	0.642299	0.294507
lcl|NC_000909.1_cds_WP_010870047.1_562	0.286864	0.751694	0.320517
lcl|NC_000909.1_cds_WP_010870048.1_563	0.229716	0.6567	0.295201
lcl|NC_000909.1_cds_WP_010870049.1_564	0.293354	0.629881	0.27381
lcl|NC_000909.1_cds_WP_010870051.1_565	0.250288	0.638539	0.307938
lcl|NC_000909.1_cds_WP_010870052.1_566	0.247906	0.657241	0.297919
lcl|NC_000909.1_cds_WP_010870053.1_567	0.278916	0.714277	0.296887
lcl|NC_000909.1_cds_WP_010870054.1_568	0.284337	0.683118	0.299495
lcl|NC_000909.1_cds_WP_010870057.1_571	0.174577	0.584474	0.295286
lcl|NC_000909.1_cds_WP_010870058.1_572	0.27756	0.570736	0.294223
lcl|NC_000909.1_cds_WP_010870059.1_573	0.259499	0.671367	0.297261
lcl|NC_000909.1_cds_WP_010870061.1_575	0.262195	0.689523	0.293803
lcl|NC_000909.1_cds_WP_010870062.1_576	0.274844	0.673446	0.287998
lcl|NC_000909.1_cds_WP_010870064.1_578	0.27757	0.654579	0.319355
lcl|NC_000909.1_cds_WP_010870067.1_581	0.246877	0.696925	0.285499
lcl|NC_000909.1_cds_WP_010870068.1_582	0.234758	0.685038	0.303224
lcl|NC_000909.1_cds_WP_010870069.1_583	0.253923	0.648933	0.27215
lcl|NC_000909.1_cds_WP_010870070.1_584	0.265379	0.63954	0.293402
lcl|NC_000909.1_cds_WP_010870071.1_585	0.223887	0.662899	0.323797
lcl|NC_000909.1_cds_WP_010870072.1_586	0.254673	0.751818	0.312118
lcl|NC_000909.1_cds_WP_010870074.1_588	0.271327	0.673708	0.310249
lcl|NC_000909.1_cds_WP_010870075.1_589	0.253413	0.676442	0.306486
lcl|NC_000909.1_cds_WP_010870076.1_590	0.249839	0.71127	0.295565
lcl|NC_000909.1_cds_WP_010870077.1_591	0.251829	0.664134	0.316461
lcl|NC_000909.1_cds_WP_010870078.1_592	0.270679	0.659131	0.270819
lcl|NC_000909.1_cds_WP_010870079.1_593	0.222222	0.657196	0.299779
lcl|NC_000909.1_cds_WP_010870080.1_594	0.268566	0.584788	0.294118
lcl|NC_000909.1_cds_WP_010870084.1_598	0.276962	0.603873	0.303917
lcl|NC_000909.1_cds_WP_010870086.1_600	0.251883	0.65551	0.315559
lcl|NC_000909.1_cds_WP_010870089.1_602	0.261926	0.65462	0.305087
lcl|NC_000909.1_cds_WP_010870091.1_604	0.296582	0.595415	0.29952
lcl|NC_000909.1_cds_WP_010870092.1_605	0.223673	0.660416	0.305183
lcl|NC_000909.1_cds_WP_010870093.1_606	0.2196	0.646191	0.304495
lcl|NC_000909.1_cds_WP_010870094.1_608	0.264455	0.677185	0.293013
lcl|NC_000909.1_cds_WP_010870095.1_610	0.275883	0.658239	0.312744
lcl|NC_000909.1_cds_WP_010870097.1_612	0.274134	0.808868	0.299429
lcl|NC_000909.1_cds_WP_010870098.1_614	0.237931	0.668439	0.277436
lcl|NC_000909.1_cds_WP_010870100.1_617	0.237628	0.764212	0.315523
lcl|NC_000909.1_cds_WP_010870102.1_619	0.251446	0.713312	0.281083
lcl|NC_000909.1_cds_WP_010870103.1_620	0.282157	0.653794	0.280293
lcl|NC_000909.1_cds_WP_010870104.1_621	0.288717	0.765527	0.295777
lcl|NC_000909.1_cds_WP_010870106.1_623	0.241099	0.687567	0.304164
lcl|NC_000909.1_cds_WP_010870108.1_625	0.246346	0.686427	0.292616
lcl|NC_000909.1_cds_WP_010870109.1_626	0.210823	0.642052	0.318788
lcl|NC_000909.1_cds_WP_010870110.1_627	0.22399	0.637024	0.260129
lcl|NC_000909.1_cds_WP_010870111.1_628	0.21446	0.675688	0.293721
lcl|NC_000909.1_cds_WP_010870112.1_629	0.224161	0.705163	0.301072
lcl|NC_000909.1_cds_WP_010870113.1_630	0.265579	0.578258	0.292203
lcl|NC_000909.1_cds_WP_010870114.1_631	0.232954	0.629762	0.286964
lcl|NC_000909.1_cds_WP_010870115.1_633	0.294274	0.60468	0.294515
lcl|NC_000909.1_cds_WP_010870116.1_634	0.289425	0.659145	0.277215
lcl|NC_000909.1_cds_WP_010870117.1_635	0.231823	0.675588	0.293248
lcl|NC_000909.1_cds_WP_010870118.1_636	0.242204	0.707711	0.292624
lcl|NC_000909.1_cds_WP_010870120.1_638	0.230245	0.701801	0.327714
lcl|NC_000909.1_cds_WP_010870121.1_639	0.278825	0.708537	0.292641
lcl|NC_000909.1_cds_WP_010870122.1_640	0.277399	0.659703	0.301937
lcl|NC_000909.1_cds_WP_010870123.1_641	0.226761	0.764229	0.298081
lcl|NC_000909.1_cds_WP_010870124.1_642	0.271044	0.676178	0.291705
lcl|NC_000909.1_cds_WP_010870125.1_643	0.278299	0.69211	0.279937
lcl|NC_000909.1_cds_WP_010870126.1_644	0.209396	0.623013	0.298295
lcl|NC_000909.1_cds_WP_010870130.1_648	0.218577	0.680153	0.283745
lcl|NC_000909.1_cds_WP_010870132.1_650	0.279818	0.698047	0.279153
lcl|NC_000909.1_cds_WP_010870133.1_651	0.316682	0.708074	0.287385
lcl|NC_000909.1_cds_WP_010870135.1_653	0.278757	0.652002	0.27506
lcl|NC_000909.1_cds_WP_010870136.1_654	0.248938	0.691884	0.288377
lcl|NC_000909.1_cds_WP_010870137.1_655	0.256699	0.674021	0.287616
lcl|NC_000909.1_cds_WP_010870139.1_657	0.238778	0.68604	0.316473
lcl|NC_000909.1_cds_WP_010870140.1_658	0.276511	0.672465	0.299162
lcl|NC_000909.1_cds_WP_010870142.1_660	0.260104	0.743994	0.276598
lcl|NC_000909.1_cds_WP_010870143.1_661	0.254465	0.692856	0.276888
lcl|NC_000909.1_cds_WP_010870145.1_663	0.255817	0.719117	0.283141
lcl|NC_000909.1_cds_WP_010870147.1_665	0.277123	0.657986	0.29086
lcl|NC_000909.1_cds_WP_010870151.1_669	0.273456	0.69346	0.302677
lcl|NC_000909.1_cds_WP_010870152.1_670	0.147545	0.522483	0.331797
lcl|NC_000909.1_cds_WP_010870153.1_671	0.257196	0.73862	0.344869
lcl|NC_000909.1_cds_WP_010870156.1_674	0.263634	0.691434	0.297459
lcl|NC_000909.1_cds_WP_010870158.1_677	0.288047	0.712635	0.309367
lcl|NC_000909.1_cds_WP_010870160.1_679	0.231927	0.691858	0.321265
lcl|NC_000909.1_cds_WP_010870161.1_680	0.263176	0.661535	0.329915
lcl|NC_000909.1_cds_WP_010870162.1_681	0.300264	0.805009	0.312486
lcl|NC_000909.1_cds_WP_010870163.1_682	0.252499	0.669703	0.282422
lcl|NC_000909.1_cds_WP_010870164.1_683	0.269207	0.767924	0.334779
lcl|NC_000909.1_cds_WP_010870165.1_684	0.355236	0.687037	0.303815
lcl|NC_000909.1_cds_WP_010870167.1_686	0.263399	0.652338	0.273026
lcl|NC_000909.1_cds_WP_010870171.1_690	0.265986	0.655424	0.274491
lcl|NC_000909.1_cds_WP_010870172.1_691	0.278883	0.675395	0.303488
lcl|NC_000909.1_cds_WP_010870173.1_692	0.302161	0.762209	0.305682
lcl|NC_000909.1_cds_WP_010870177.1_696	0.277762	0.613334	0.279101
lcl|NC_000909.1_cds_WP_010870178.1_697	0.251522	0.747694	0.320542
lcl|NC_000909.1_cds_WP_010870179.1_698	0.271267	0.673971	0.286468
lcl|NC_000909.1_cds_WP_010870180.1_699	0.236594	0.67924	0.291313
lcl|NC_000909.1_cds_WP_010870181.1_700	0.247308	0.669956	0.294259
lcl|NC_000909.1_cds_WP_010870182.1_701	0.258096	0.710673	0.317041
lcl|NC_000909.1_cds_WP_010870183.1_702	0.259675	0.655725	0.293691
lcl|NC_000909.1_cds_WP_010870184.1_703	0.247754	0.686404	0.317791
lcl|NC_000909.1_cds_WP_010870185.1_704	0.255287	0.700704	0.296513
lcl|NC_000909.1_cds_WP_010870186.1_705	0.267018	0.716407	0.312707
lcl|NC_000909.1_cds_WP_010870187.1_706	0.245188	0.659125	0.316291
lcl|NC_000909.1_cds_WP_010870188.1_707	0.258566	0.632994	0.290892
lcl|NC_000909.1_cds_WP_010870189.1_708	0.25345	0.686852	0.296462
lcl|NC_000909.1_cds_WP_010870190.1_709	0.227701	0.659212	0.291454
lcl|NC_000909.1_cds_WP_010870191.1_710	0.289619	0.681803	0.29622
lcl|NC_000909.1_cds_WP_010870192.1_711	0.256139	0.674923	0.315889
lcl|NC_000909.1_cds_WP_010870196.1_715	0.224693	0.67035	0.338771
lcl|NC_000909.1_cds_WP_010870197.1_716	0.281187	0.702308	0.298791
lcl|NC_000909.1_cds_WP_010870199.1_718	0.232889	0.696362	0.305836
lcl|NC_000909.1_cds_WP_010870200.1_719	0.320169	0.738061	0.285817
lcl|NC_000909.1_cds_WP_010870201.1_720	0.277266	0.688556	0.284507
lcl|NC_000909.1_cds_WP_010870202.1_721	0.266302	0.727537	0.306165
lcl|NC_000909.1_cds_WP_010870205.1_724	0.279012	0.631519	0.285875
lcl|NC_000909.1_cds_WP_010870206.1_725	0.252964	0.663664	0.292651
lcl|NC_000909.1_cds_WP_010870207.1_726	0.252265	0.680139	0.301302
lcl|NC_000909.1_cds_WP_010870208.1_727	0.262135	0.67948	0.282799
lcl|NC_000909.1_cds_WP_010870210.1_729	0.307902	0.65602	0.29285
lcl|NC_000909.1_cds_WP_010870211.1_730	0.257378	0.675722	0.303358
lcl|NC_000909.1_cds_WP_010870212.1_731	0.282153	0.613249	0.285181
lcl|NC_000909.1_cds_WP_010870213.1_732	0.305743	0.820794	0.342727
lcl|NC_000909.1_cds_WP_010870215.1_734	0.279715	0.656848	0.289536
lcl|NC_000909.1_cds_WP_010870216.1_735	0.276093	0.638088	0.293243
lcl|NC_000909.1_cds_WP_010870217.1_736	0.266324	0.662069	0.304996
lcl|NC_000909.1_cds_WP_010870218.1_737	0.270885	0.679276	0.290304
lcl|NC_000909.1_cds_WP_010870221.1_740	0.235507	0.70148	0.291217
lcl|NC_000909.1_cds_WP_010870222.1_742	0.241686	0.756283	0.301048
lcl|NC_000909.1_cds_WP_010870223.1_743	0.276157	0.601608	0.283466
lcl|NC_000909.1_cds_WP_010870225.1_745	0.272773	0.736258	0.298104
lcl|NC_000909.1_cds_WP_010870226.1_746	0.244659	0.646014	0.297489
lcl|NC_000909.1_cds_WP_010870227.1_747	0.248241	0.657469	0.293737
lcl|NC_000909.1_cds_WP_010870230.1_750	0.256659	0.664039	0.299668
lcl|NC_000909.1_cds_WP_010870231.1_751	0.255577	0.676685	0.289674
lcl|NC_000909.1_cds_WP_010870232.1_752	0.244454	0.700302	0.30745
lcl|NC_000909.1_cds_WP_010870233.1_753	0.25375	0.666163	0.316183
lcl|NC_000909.1_cds_WP_010870235.1_755	0.231886	0.654883	0.303298
lcl|NC_000909.1_cds_WP_010870236.1_756	0.191975	0.638805	0.29115
lcl|NC_000909.1_cds_WP_010870240.1_760	0.266829	0.634105	0.310605
lcl|NC_000909.1_cds_WP_010870241.1_761	0.238046	0.648566	0.311979
lcl|NC_000909.1_cds_WP_010870242.1_762	0.280463	0.555545	0.320001
lcl|NC_000909.1_cds_WP_010870244.1_764	0.281288	0.640031	0.296734
lcl|NC_000909.1_cds_WP_010870246.1_766	0.291777	0.631409	0.322919
lcl|NC_000909.1_cds_WP_010870247.1_767	0.258267	0.638519	0.327423
lcl|NC_000909.1_cds_WP_010870248.1_768	0.284184	0.602519	0.315064
lcl|NC_000909.1_cds_WP_010870249.1_769	0.317694	0.66289	0.31327
lcl|NC_000909.1_cds_WP_010870251.1_771	0.284141	0.769496	0.358164
lcl|NC_000909.1_cds_WP_010870253.1_773	0.259854	0.639812	0.310783
lcl|NC_000909.1_cds_WP_010870254.1_774	0.249848	0.636537	0.285236
lcl|NC_000909.1_cds_WP_010870255.1_775	0.243014	0.639246	0.283347
lcl|NC_000909.1_cds_WP_010870256.1_776	0.227246	0.550272	0.294464
lcl|NC_000909.1_cds_WP_010870257.1_777	0.291405	0.749124	0.30531
lcl|NC_000909.1_cds_WP_010870258.1_778	0.2462	0.615536	0.288915
lcl|NC_000909.1_cds_WP_010870259.1_779	0.26759	0.694239	0.313528
lcl|NC_000909.1_cds_WP_010870260.1_781	0.271703	0.66881	0.306007
lcl|NC_000909.1_cds_WP_010870261.1_783	0.253454	0.654139	0.292613
lcl|NC_000909.1_cds_WP_010870266.1_788	0.223439	0.660234	0.297662
lcl|NC_000909.1_cds_WP_010870267.1_789	0.23856	0.525554	0.295292
lcl|NC_000909.1_cds_WP_010870268.1_790	0.205456	0.647568	0.306812
lcl|NC_000909.1_cds_WP_010870269.1_791	0.271895	0.66722	0.304634
lcl|NC_000909.1_cds_WP_010870270.1_792	0.268616	0.641378	0.299856
lcl|NC_000909.1_cds_WP_010870272.1_794	0.218633	0.696229	0.275372
lcl|NC_000909.1_cds_WP_010870273.1_795	0.240809	0.669242	0.299563
lcl|NC_000909.1_cds_WP_010870274.1_796	0.186785	0.643974	0.289407
lcl|NC_000909.1_cds_WP_010870275.1_797	0.22017	0.591192	0.298173
lcl|NC_000909.1_cds_WP_010870276.1_798	0.231655	0.594802	0.295976
lcl|NC_000909.1_cds_WP_010870277.1_799	0.247808	0.652342	0.292983
lcl|NC_000909.1_cds_WP_010870278.1_800	0.236758	0.530972	0.292627
lcl|NC_000909.1_cds_WP_010870279.1_801	0.238183	0.641546	0.301195
lcl|NC_000909.1_cds_WP_010870281.1_803	0.252648	0.687076	0.277579
lcl|NC_000909.1_cds_WP_010870283.1_805	0.226173	0.625977	0.289105
lcl|NC_000909.1_cds_WP_010870284.1_806	0.292557	0.623511	0.300503
lcl|NC_000909.1_cds_WP_010870285.1_807	0.275316	0.602464	0.305188
lcl|NC_000909.1_cds_WP_010870287.1_809	0.272032	0.657263	0.295146
lcl|NC_000909.1_cds_WP_010870288.1_810	0.210032	0.589665	0.27631
lcl|NC_000909.1_cds_WP_010870289.1_811	0.256792	0.630514	0.272467
lcl|NC_000909.1_cds_WP_010870290.1_812	0.293974	0.726895	0.323403
lcl|NC_000909.1_cds_WP_010870292.1_814	0.235315	0.639019	0.26777
lcl|NC_000909.1_cds_WP_010870294.1_816	0.229165	0.67429	0.296691
lcl|NC_000909.1_cds_WP_010870296.1_818	0.260502	0.697281	0.266553
lcl|NC_000909.1_cds_WP_010870297.1_819	0.270193	0.662176	0.268714
lcl|NC_000909.1_cds_WP_010870298.1_820	0.257685	0.688809	0.316229
lcl|NC_000909.1_cds_WP_010870299.1_821	0.223709	0.586569	0.272501
lcl|NC_000909.1_cds_WP_010870300.1_822	0.250772	0.595725	0.271112
lcl|NC_000909.1_cds_WP_010870301.1_823	0.295955	0.551477	0.283767
lcl|NC_000909.1_cds_WP_010870303.1_825	0.267067	0.659267	0.280894
lcl|NC_000909.1_cds_WP_010870304.1_826	0.257784	0.626373	0.285452
lcl|NC_000909.1_cds_WP_010870305.1_827	0.232226	0.662496	0.30775
lcl|NC_000909.1_cds_WP_010870306.1_828	0.245257	0.595663	0.267891
lcl|NC_000909.1_cds_WP_010870307.1_829	0.248432	0.677803	0.277527
lcl|NC_000909.1_cds_WP_010870308.1_830	0.278114	0.722206	0.30225
lcl|NC_000909.1_cds_WP_010870311.1_833	0.226681	0.604527	0.28568
lcl|NC_000909.1_cds_WP_010870312.1_834	0.215333	0.651184	0.298594
lcl|NC_000909.1_cds_WP_010870313.1_835	0.229106	0.572562	0.276373
lcl|NC_000909.1_cds_WP_010870318.1_840	0.259122	0.637668	0.299392
lcl|NC_000909.1_cds_WP_010870319.1_841	0.265853	0.593211	0.319867
lcl|NC_000909.1_cds_WP_010870320.1_843	0.270585	0.715628	0.302564
lcl|NC_000909.1_cds_WP_010870322.1_845	0.213705	0.647025	0.2954
lcl|NC_000909.1_cds_WP_010870323.1_846	0.236309	0.665039	0.300369
lcl|NC_000909.1_cds_WP_010870324.1_847	0.243037	0.659449	0.287313
lcl|NC_000909.1_cds_WP_010870326.1_849	0.273214	0.667884	0.287331
lcl|NC_000909.1_cds_WP_010870327.1_850	0.249613	0.699917	0.282802
lcl|NC_000909.1_cds_WP_010870328.1_851	0.27038	0.630714	0.286731
lcl|NC_000909.1_cds_WP_010870329.1_852	0.280263	0.673242	0.27921
lcl|NC_000909.1_cds_WP_010870333.1_856	0.332704	0.714048	0.301549
lcl|NC_000909.1_cds_WP_010870334.1_857	0.290849	0.772126	0.294951
lcl|NC_000909.1_cds_WP_010870335.1_858	0.254767	0.671036	0.290346
lcl|NC_000909.1_cds_WP_010870336.1_859	0.277307	0.714449	0.300544
lcl|NC_000909.1_cds_WP_010870337.1_860	0.250735	0.639752	0.307779
lcl|NC_000909.1_cds_WP_010870340.1_862	0.220425	0.670788	0.318657
lcl|NC_000909.1_cds_WP_010870341.1_863	0.282708	0.701812	0.283573
lcl|NC_000909.1_cds_WP_010870342.1_864	0.25238	0.628582	0.294496
lcl|NC_000909.1_cds_WP_010870344.1_867	0.294449	0.614424	0.273098
lcl|NC_000909.1_cds_WP_010870345.1_868	0.281579	0.639869	0.276783
lcl|NC_000909.1_cds_WP_010870346.1_869	0.30477	0.674407	0.282623
lcl|NC_000909.1_cds_WP_010870347.1_870	0.28538	0.631938	0.296559
lcl|NC_000909.1_cds_WP_010870349.1_872	0.300415	0.602206	0.285679
lcl|NC_000909.1_cds_WP_010870350.1_873	0.270602	0.737428	0.296537
lcl|NC_000909.1_cds_WP_010870351.1_874	0.280863	0.72243	0.295717
lcl|NC_000909.1_cds_WP_010870352.1_875	0.278982	0.709127	0.274626
lcl|NC_000909.1_cds_WP_010870353.1_876	0.295472	0.710216	0.286868
lcl|NC_000909.1_cds_WP_010870355.1_878	0.289839	0.748293	0.285261
lcl|NC_000909.1_cds_WP_010870358.1_881	0.242753	0.506756	0.304972
lcl|NC_000909.1_cds_WP_010870359.1_882	0.277575	0.711394	0.315357
lcl|NC_000909.1_cds_WP_010870360.1_883	0.265294	0.664871	0.321333
lcl|NC_000909.1_cds_WP_010870361.1_884	0.257846	0.665298	0.282235
lcl|NC_000909.1_cds_WP_010870362.1_885	0.28121	0.652226	0.296558
lcl|NC_000909.1_cds_WP_010870363.1_886	0.290057	0.642836	0.293099
lcl|NC_000909.1_cds_WP_010870364.1_887	0.250416	0.628611	0.299106
lcl|NC_000909.1_cds_WP_010870366.1_889	0.263632	0.61099	0.300241
lcl|NC_000909.1_cds_WP_010870367.1_890	0.23087	0.553025	0.320658
lcl|NC_000909.1_cds_WP_010870368.1_891	0.278285	0.698824	0.315945
lcl|NC_000909.1_cds_WP_010870369.1_892	0.265152	0.621622	0.313428
lcl|NC_000909.1_cds_WP_010870373.1_895	0.230451	0.64976	0.290089
lcl|NC_000909.1_cds_WP_010870376.1_898	0.271901	0.682624	0.299026
lcl|NC_000909.1_cds_WP_010870377.1_899	0.276584	0.708966	0.29028
lcl|NC_000909.1_cds_WP_010870378.1_900	0.261982	0.681787	0.310934
lcl|NC_000909.1_cds_WP_010870379.1_901	0.275338	0.770494	0.291547
lcl|NC_000909.1_cds_WP_010870381.1_903	0.250687	0.677878	0.280874
lcl|NC_000909.1_cds_WP_010870383.1_905	0.261837	0.718521	0.297152
lcl|NC_000909.1_cds_WP_010870385.1_907	0.259059	0.687117	0.304382
lcl|NC_000909.1_cds_WP_010870386.1_908	0.234596	0.623474	0.292076
lcl|NC_000909.1_cds_WP_010870390.1_911	0.282216	0.721402	0.301133
lcl|NC_000909.1_cds_WP_010870391.1_912	0.238007	0.568439	0.278987
lcl|NC_000909.1_cds_WP_010870392.1_914	0.269224	0.664731	0.297359
lcl|NC_000909.1_cds_WP_010870393.1_915	0.245039	0.704622	0.292838
lcl|NC_000909.1_cds_WP_010870394.1_916	0.25512	0.608104	0.273763
lcl|NC_000909.1_cds_WP_010870395.1_917	0.256076	0.652455	0.295995
lcl|NC_000909.1_cds_WP_010870396.1_918	0.25933	0.697742	0.278239
lcl|NC_000909.1_cds_WP_010870397.1_919	0.211891	0.658135	0.292965
lcl|NC_000909.1_cds_WP_010870398.1_921	0.226108	0.64935	0.30824
lcl|NC_000909.1_cds_WP_010870399.1_922	0.248049	0.661525	0.296802
lcl|NC_000909.1_cds_WP_010870400.1_923	0.259924	0.682355	0.291845
lcl|NC_000909.1_cds_WP_010870402.1_925	0.281864	0.641177	0.291443
lcl|NC_000909.1_cds_WP_010870403.1_926	0.270223	0.635655	0.278968
lcl|NC_000909.1_cds_WP_010870404.1_927	0.255627	0.675152	0.313217
lcl|NC_000909.1_cds_WP_010870405.1_928	0.283084	0.659439	0.299321
lcl|NC_000909.1_cds_WP_010870406.1_929	0.303781	0.645779	0.296617
lcl|NC_000909.1_cds_WP_010870408.1_931	0.25563	0.601527	0.30527
lcl|NC_000909.1_cds_WP_010870409.1_932	0.240975	0.609945	0.317949
lcl|NC_000909.1_cds_WP_010870411.1_934	0.254933	0.515143	0.279663
lcl|NC_000909.1_cds_WP_010870417.1_940	0.250265	0.653703	0.275068
lcl|NC_000909.1_cds_WP_010870418.1_941	0.243884	0.60068	0.286237
lcl|NC_000909.1_cds_WP_010870419.1_942	0.208435	0.461898	0.302228
lcl|NC_000909.1_cds_WP_010870420.1_943	0.247624	0.668239	0.287183
lcl|NC_000909.1_cds_WP_010870423.1_947	0.291482	0.679638	0.271495
lcl|NC_000909.1_cds_WP_010870429.1_956	0.256066	0.678121	0.277897
lcl|NC_000909.1_cds_WP_010870430.1_957	0.234516	0.609091	0.264595
lcl|NC_000909.1_cds_WP_010870432.1_959	0.270183	0.708477	0.303941
lcl|NC_000909.1_cds_WP_010870433.1_960	0.294727	0.634073	0.333362
lcl|NC_000909.1_cds_WP_010870434.1_961	0.240479	0.644647	0.30243
lcl|NC_000909.1_cds_WP_010870435.1_962	0.28872	0.656767	0.301149
lcl|NC_000909.1_cds_WP_010870436.1_963	0.285917	0.649037	0.295004
lcl|NC_000909.1_cds_WP_010870437.1_964	0.27819	0.614942	0.292892
lcl|NC_000909.1_cds_WP_010870439.1_966	0.228865	0.60432	0.344864
lcl|NC_000909.1_cds_WP_010870442.1_969	0.291251	0.645109	0.284251
lcl|NC_000909.1_cds_WP_010870444.1_971	0.287043	0.714921	0.305258
lcl|NC_000909.1_cds_WP_010870446.1_973	0.304141	0.756597	0.363589
lcl|NC_000909.1_cds_WP_010870449.1_976	0.273131	0.714607	0.273094
lcl|NC_000909.1_cds_WP_010870450.1_977	0.225131	0.650094	0.281598
lcl|NC_000909.1_cds_WP_010870451.1_978	0.2566	0.718915	0.313032
lcl|NC_000909.1_cds_WP_010870454.1_981	0.262696	0.616596	0.294385
lcl|NC_000909.1_cds_WP_010870456.1_983	0.253493	0.706123	0.29282
lcl|NC_000909.1_cds_WP_010870458.1_985	0.303894	0.698992	0.295333
lcl|NC_000909.1_cds_WP_010870459.1_986	0.256435	0.607612	0.283353
lcl|NC_000909.1_cds_WP_010870460.1_987	0.228415	0.672343	0.279831
lcl|NC_000909.1_cds_WP_010870461.1_988	0.246889	0.703715	0.310196
lcl|NC_000909.1_cds_WP_010870463.1_990	0.230327	0.654614	0.291821
lcl|NC_000909.1_cds_WP_010870467.1_994	0.250976	0.68351	0.281904
lcl|NC_000909.1_cds_WP_010870468.1_995	0.268183	0.638294	0.28406
lcl|NC_000909.1_cds_WP_010870470.1_997	0.23985	0.662293	0.288811
lcl|NC_000909.1_cds_WP_010870471.1_998	0.289854	0.66177	0.291407
lcl|NC_000909.1_cds_WP_010870472.1_999	0.271817	0.651559	0.275085
lcl|NC_000909.1_cds_WP_010870473.1_1000	0.25795	0.700161	0.32057
lcl|NC_000909.1_cds_WP_010870474.1_1001	0.266261	0.719534	0.315588
lcl|NC_000909.1_cds_WP_010870475.1_1002	0.250395	0.683859	0.30072
lcl|NC_000909.1_cds_WP_010870476.1_1003	0.226728	0.66909	0.335011
lcl|NC_000909.1_cds_WP_010870477.1_1004	0.278665	0.640606	0.286868
lcl|NC_000909.1_cds_WP_010870478.1_1005	0.235017	0.643657	0.293302
lcl|NC_000909.1_cds_WP_010870481.1_1008	0.281793	0.682162	0.30891
lcl|NC_000909.1_cds_WP_010870482.1_1009	0.244988	0.661745	0.298728
lcl|NC_000909.1_cds_WP_010870483.1_1010	0.304795	0.720901	0.275056
lcl|NC_000909.1_cds_WP_010870484.1_1011	0.259249	0.702815	0.292693
lcl|NC_000909.1_cds_WP_010870487.1_1014	0.273067	0.682279	0.288429
lcl|NC_000909.1_cds_WP_010870488.1_1015	0.264489	0.738867	0.279571
lcl|NC_000909.1_cds_WP_010870489.1_1016	0.278053	0.660838	0.308832
lcl|NC_000909.1_cds_WP_010870490.1_1017	0.286996	0.686414	0.280237
lcl|NC_000909.1_cds_WP_010870491.1_1018	0.249081	0.645206	0.299531
lcl|NC_000909.1_cds_WP_010870493.1_1020	0.271204	0.536828	0.299899
lcl|NC_000909.1_cds_WP_010870494.1_1021	0.27801	0.725812	0.326183
lcl|NC_000909.1_cds_WP_010870496.1_1023	0.250293	0.69335	0.314254
lcl|NC_000909.1_cds_WP_010870497.1_1024	0.263376	0.734715	0.322093
lcl|NC_000909.1_cds_WP_010870498.1_1025	0.256248	0.569071	0.300137
lcl|NC_000909.1_cds_WP_010870499.1_1026	0.289597	0.66171	0.315269
lcl|NC_000909.1_cds_WP_010870502.1_1029	0.211831	0.653642	0.288079
lcl|NC_000909.1_cds_WP_010870503.1_1030	0.253636	0.623897	0.300967
lcl|NC_000909.1_cds_WP_010870505.1_1032	0.206944	0.632085	0.294836
lcl|NC_000909.1_cds_WP_010870506.1_1033	0.285151	0.652451	0.28234
lcl|NC_000909.1_cds_WP_010870507.1_1034	0.222881	0.620945	0.287466
lcl|NC_000909.1_cds_WP_010870508.1_1035	0.268758	0.669905	0.295491
lcl|NC_000909.1_cds_WP_010870509.1_1036	0.246914	0.658888	0.276926
lcl|NC_000909.1_cds_WP_010870510.1_1037	0.253478	0.671581	0.295533
lcl|NC_000909.1_cds_WP_010870511.1_1039	0.259497	0.625551	0.2797
lcl|NC_000909.1_cds_WP_010870512.1_1040	0.289308	0.747473	0.333964
lcl|NC_000909.1_cds_WP_010870515.1_1043	0.26342	0.676098	0.295729
lcl|NC_000909.1_cds_WP_010870516.1_1044	0.257966	0.678971	0.299701
lcl|NC_000909.1_cds_WP_010870517.1_1045	0.220183	0.652218	0.302453
lcl|NC_000909.1_cds_WP_010870518.1_1046	0.218666	0.635988	0.289589
lcl|NC_000909.1_cds_WP_010870520.1_1048	0.235572	0.696654	0.306687
lcl|NC_000909.1_cds_WP_010870521.1_1049	0.258661	0.66328	0.28682
lcl|NC_000909.1_cds_WP_010870522.1_1050	0.267406	0.715548	0.311366
lcl|NC_000909.1_cds_WP_010870524.1_1053	0.259997	0.604041	0.30584
lcl|NC_000909.1_cds_WP_010870525.1_1054	0.198351	0.615924	0.302961
lcl|NC_000909.1_cds_WP_010870526.1_1055	0.265022	0.589194	0.307455
lcl|NC_000909.1_cds_WP_010870529.1_1058	0.266848	0.605996	0.304475
lcl|NC_000909.1_cds_WP_010870530.1_1059	0.25736	0.708706	0.287362
lcl|NC_000909.1_cds_WP_010870531.1_1060	0.2581	0.665402	0.304568
lcl|NC_000909.1_cds_WP_010870532.1_1061	0.265785	0.730853	0.293472
lcl|NC_000909.1_cds_WP_010870534.1_1063	0.27738	0.656909	0.317071
lcl|NC_000909.1_cds_WP_010870536.1_1065	0.221871	0.693735	0.292644
lcl|NC_000909.1_cds_WP_010870537.1_1066	0.267696	0.618095	0.279799
lcl|NC_000909.1_cds_WP_010870539.1_1068	0.257573	0.695118	0.306187
lcl|NC_000909.1_cds_WP_010870542.1_1071	0.235905	0.661852	0.289866
lcl|NC_000909.1_cds_WP_010870543.1_1072	0.233009	0.716798	0.291474
lcl|NC_000909.1_cds_WP_010870545.1_1074	0.24181	0.628937	0.289344
lcl|NC_000909.1_cds_WP_010870546.1_1075	0.26727	0.612585	0.301298
lcl|NC_000909.1_cds_WP_010870547.1_1076	0.226241	0.730586	0.308999
lcl|NC_000909.1_cds_WP_010870548.1_1077	0.26147	0.690179	0.330253
lcl|NC_000909.1_cds_WP_010870552.1_1081	0.216088	0.676999	0.284863
lcl|NC_000909.1_cds_WP_010870556.1_1085	0.236665	0.67581	0.301317
lcl|NC_000909.1_cds_WP_010870558.1_1087	0.2483	0.740189	0.299682
lcl|NC_000909.1_cds_WP_010870559.1_1088	0.251875	0.767693	0.303459
lcl|NC_000909.1_cds_WP_010870560.1_1089	0.290191	0.779182	0.316184
lcl|NC_000909.1_cds_WP_010870561.1_1090	0.272568	0.699993	0.324837
lcl|NC_000909.1_cds_WP_010870562.1_1092	0.264729	0.66278	0.302957
lcl|NC_000909.1_cds_WP_010870563.1_1093	0.252048	0.721108	0.291897
lcl|NC_000909.1_cds_WP_010870564.1_1094	0.274232	0.717345	0.283852
lcl|NC_000909.1_cds_WP_010870566.1_1096	0.228349	0.693203	0.347688
lcl|NC_000909.1_cds_WP_010870567.1_1098	0.24924	0.64564	0.293265
lcl|NC_000909.1_cds_WP_010870568.1_1099	0.246866	0.671986	0.281101
lcl|NC_000909.1_cds_WP_010870571.1_1102	0.288664	0.712644	0.29408
lcl|NC_000909.1_cds_WP_010870572.1_1103	0.264343	0.664403	0.292761
lcl|NC_000909.1_cds_WP_010870573.1_1104	0.291639	0.736298	0.276331
lcl|NC_000909.1_cds_WP_010870574.1_1105	0.282413	0.703605	0.291351
lcl|NC_000909.1_cds_WP_010870575.1_1106	0.279058	0.667348	0.288951
lcl|NC_000909.1_cds_WP_010870576.1_1107	0.27544	0.685592	0.279092
lcl|NC_000909.1_cds_WP_010870578.1_1109	0.281251	0.649992	0.303847
lcl|NC_000909.1_cds_WP_010870579.1_1110	0.257235	0.674844	0.304385
lcl|NC_000909.1_cds_WP_010870580.1_1111	0.264367	0.655721	0.27133
lcl|NC_000909.1_cds_WP_010870581.1_1112	0.256269	0.728701	0.282616
lcl|NC_000909.1_cds_WP_010870582.1_1113	0.269783	0.683743	0.259164
lcl|NC_000909.1_cds_WP_010870583.1_1114	0.231844	0.698338	0.275085
lcl|NC_000909.1_cds_WP_010870584.1_1115	0.278885	0.615284	0.306001
lcl|NC_000909.1_cds_WP_010870586.1_1117	0.231692	0.728013	0.303947
lcl|NC_000909.1_cds_WP_010870588.1_1119	0.274881	0.64578	0.284464
lcl|NC_000909.1_cds_WP_010870589.1_1120	0.238977	0.708358	0.312124
lcl|NC_000909.1_cds_WP_010870590.1_1121	0.273723	0.60926	0.276187
lcl|NC_000909.1_cds_WP_010870591.1_1123	0.281108	0.654794	0.266849
lcl|NC_000909.1_cds_WP_010870594.1_1126	0.232404	0.665782	0.292167
lcl|NC_000909.1_cds_WP_010870595.1_1127	0.286091	0.741825	0.290563
lcl|NC_000909.1_cds_WP_010870596.1_1128	0.258668	0.714467	0.300139
lcl|NC_000909.1_cds_WP_010870597.1_1129	0.296133	0.692323	0.295216
lcl|NC_000909.1_cds_WP_010870598.1_1130	0.272732	0.74248	0.300062
lcl|NC_000909.1_cds_WP_010870599.1_1131	0.264085	0.687675	0.294746
lcl|NC_000909.1_cds_WP_010870600.1_1132	0.249371	0.614898	0.295719
lcl|NC_000909.1_cds_WP_010870602.1_1134	0.321918	0.674931	0.312593
lcl|NC_000909.1_cds_WP_010870603.1_1135	0.273471	0.559886	0.315217
lcl|NC_000909.1_cds_WP_010870604.1_1136	0.289653	0.606633	0.29395
lcl|NC_000909.1_cds_WP_010870605.1_1137	0.245328	0.640076	0.292443
lcl|NC_000909.1_cds_WP_010870606.1_1138	0.239099	0.68008	0.299253
lcl|NC_000909.1_cds_WP_010870608.1_1140	0.246237	0.719394	0.291191
lcl|NC_000909.1_cds_WP_010870610.1_1142	0.221564	0.546987	0.27907
lcl|NC_000909.1_cds_WP_010870611.1_1143	0.261907	0.710768	0.296006
lcl|NC_000909.1_cds_WP_010870612.1_1144	0.269489	0.687755	0.296969
lcl|NC_000909.1_cds_WP_010870613.1_1145	0.265149	0.733414	0.288458
lcl|NC_000909.1_cds_WP_010870615.1_1147	0.229442	0.708328	0.266223
lcl|NC_000909.1_cds_WP_010870617.1_1149	0.246834	0.647976	0.289225
lcl|NC_000909.1_cds_WP_010870618.1_1150	0.240799	0.653168	0.310527
lcl|NC_000909.1_cds_WP_010870619.1_1151	0.291622	0.678466	0.310241
lcl|NC_000909.1_cds_WP_010870620.1_1152	0.270413	0.725612	0.295455
lcl|NC_000909.1_cds_WP_010870621.1_1153	0.258011	0.626724	0.290465
lcl|NC_000909.1_cds_WP_010870622.1_1154	0.249028	0.689954	0.298912
lcl|NC_000909.1_cds_WP_010870623.1_1155	0.22069	0.629856	0.288514
lcl|NC_000909.1_cds_WP_010870624.1_1156	0.246803	0.650056	0.279672
lcl|NC_000909.1_cds_WP_010870625.1_1158	0.273657	0.63308	0.310268
lcl|NC_000909.1_cds_WP_010870628.1_1161	0.282249	0.648941	0.274354
lcl|NC_000909.1_cds_WP_010870629.1_1162	0.28608	0.645432	0.304164
lcl|NC_000909.1_cds_WP_010870630.1_1163	0.262045	0.689799	0.296499
lcl|NC_000909.1_cds_WP_010870631.1_1164	0.239156	0.665378	0.276058
lcl|NC_000909.1_cds_WP_010870632.1_1165	0.304226	0.68523	0.284247
lcl|NC_000909.1_cds_WP_010870633.1_1166	0.242429	0.673794	0.337152
lcl|NC_000909.1_cds_WP_010870634.1_1167	0.281185	0.773826	0.30134
lcl|NC_000909.1_cds_WP_010870635.1_1168	0.250038	0.64753	0.296938
lcl|NC_000909.1_cds_WP_010870637.1_1170	0.2303	0.657024	0.304936
lcl|NC_000909.1_cds_WP_010870640.1_1173	0.26221	0.597539	0.328817
lcl|NC_000909.1_cds_WP_010870641.1_1174	0.239359	0.613918	0.296433
lcl|NC_000909.1_cds_WP_010870642.1_1175	0.242523	0.654664	0.312097
lcl|NC_000909.1_cds_WP_010870643.1_1176	0.31182	0.617803	0.300629
lcl|NC_000909.1_cds_WP_010870645.1_1178	0.22895	0.682313	0.290131
lcl|NC_000909.1_cds_WP_010870646.1_1179	0.251762	0.709251	0.293229
lcl|NC_000909.1_cds_WP_010870648.1_1181	0.288406	0.672928	0.272799
lcl|NC_000909.1_cds_WP_010870649.1_1182	0.246427	0.65715	0.284968
lcl|NC_000909.1_cds_WP_010870650.1_1183	0.226869	0.66394	0.287414
lcl|NC_000909.1_cds_WP_010870653.1_1186	0.230568	0.649786	0.329853
lcl|NC_000909.1_cds_WP_010870654.1_1187	0.263262	0.611412	0.277741
lcl|NC_000909.1_cds_WP_010870656.1_1190	0.255239	0.68251	0.327501
lcl|NC_000909.1_cds_WP_010870657.1_1191	0.263559	0.690682	0.298439
lcl|NC_000909.1_cds_WP_010870658.1_1192	0.291439	0.725758	0.282497
lcl|NC_000909.1_cds_WP_010870659.1_1193	0.258639	0.740047	0.318049
lcl|NC_000909.1_cds_WP_010870660.1_1194	0.253983	0.642629	0.288056
lcl|NC_000909.1_cds_WP_010870663.1_1197	0.279695	0.679548	0.309043
lcl|NC_000909.1_cds_WP_010870664.1_1198	0.31219	0.810629	0.38088
lcl|NC_000909.1_cds_WP_010870665.1_1199	0.234895	0.656443	0.297192
lcl|NC_000909.1_cds_WP_010870666.1_1200	0.252139	0.697896	0.292918
lcl|NC_000909.1_cds_WP_010870667.1_1201	0.282981	0.670697	0.27845
lcl|NC_000909.1_cds_WP_010870668.1_1202	0.249336	0.627996	0.275436
lcl|NC_000909.1_cds_WP_010870669.1_1203	0.261331	0.712574	0.319744
lcl|NC_000909.1_cds_WP_010870671.1_1205	0.246508	0.708331	0.283453
lcl|NC_000909.1_cds_WP_010870672.1_1206	0.262995	0.725093	0.300083
lcl|NC_000909.1_cds_WP_010870673.1_1207	0.261971	0.694342	0.299715
lcl|NC_000909.1_cds_WP_010870674.1_1208	0.288	0.638389	0.267101
lcl|NC_000909.1_cds_WP_010870676.1_1211	0.27471	0.683198	0.306438
lcl|NC_000909.1_cds_WP_010870678.1_1213	0.259704	0.602159	0.305891
lcl|NC_000909.1_cds_WP_010870679.1_1214	0.269683	0.707594	0.293219
lcl|NC_000909.1_cds_WP_010870680.1_1215	0.303507	0.760364	0.274107
lcl|NC_000909.1_cds_WP_010870681.1_1216	0.310157	0.704608	0.32923
lcl|NC_000909.1_cds_WP_010870682.1_1217	0.268612	0.681121	0.313724
lcl|NC_000909.1_cds_WP_010870684.1_1219	0.262348	0.736234	0.302054
lcl|NC_000909.1_cds_WP_010870686.1_1221	0.274276	0.671458	0.277685
lcl|NC_000909.1_cds_WP_010870689.1_1224	0.246525	0.674245	0.317952
lcl|NC_000909.1_cds_WP_010870691.1_1226	0.273455	0.577284	0.285499
lcl|NC_000909.1_cds_WP_010870692.1_1227	0.229088	0.645402	0.287543
lcl|NC_000909.1_cds_WP_010870695.1_1229	0.289429	0.64049	0.280613
lcl|NC_000909.1_cds_WP_010870697.1_1231	0.251903	0.652167	0.316014
lcl|NC_000909.1_cds_WP_010870698.1_1232	0.248855	0.689231	0.298099
lcl|NC_000909.1_cds_WP_010870702.1_1236	0.27655	0.611092	0.275414
lcl|NC_000909.1_cds_WP_010870705.1_1241	0.258536	0.663932	0.305279
lcl|NC_000909.1_cds_WP_010870707.1_1245	0.241875	0.686214	0.305938
lcl|NC_000909.1_cds_WP_010870708.1_1246	0.238789	0.563287	0.281064
lcl|NC_000909.1_cds_WP_010870710.1_1248	0.243481	0.668502	0.298522
lcl|NC_000909.1_cds_WP_010870713.1_1251	0.295662	0.703811	0.340582
lcl|NC_000909.1_cds_WP_010870715.1_1253	0.275572	0.728373	0.311503
lcl|NC_000909.1_cds_WP_010870716.1_1254	0.267351	0.676482	0.301529
lcl|NC_000909.1_cds_WP_010870717.1_1255	0.279221	0.607039	0.292388
lcl|NC_000909.1_cds_WP_010870719.1_1257	0.249265	0.666079	0.295282
lcl|NC_000909.1_cds_WP_010870720.1_1258	0.24295	0.717174	0.296963
lcl|NC_000909.1_cds_WP_010870721.1_1259	0.291974	0.709474	0.294543
lcl|NC_000909.1_cds_WP_010870724.1_1263	0.253146	0.590442	0.276297
lcl|NC_000909.1_cds_WP_010870725.1_1264	0.262645	0.623728	0.293739
lcl|NC_000909.1_cds_WP_010870728.1_1267	0.226001	0.672463	0.314299
lcl|NC_000909.1_cds_WP_010870729.1_1268	0.301947	0.652512	0.307429
lcl|NC_000909.1_cds_WP_010870735.1_1274	0.246429	0.580723	0.279094
lcl|NC_000909.1_cds_WP_010870736.1_1276	0.22202	0.629129	0.310775
lcl|NC_000909.1_cds_WP_010870739.1_1279	0.241403	0.692012	0.290335
lcl|NC_000909.1_cds_WP_010870740.1_1280	0.263467	0.757371	0.308933
lcl|NC_000909.1_cds_WP_010870741.1_1281	0.249819	0.683924	0.306953
lcl|NC_000909.1_cds_WP_010870743.1_1283	0.227603	0.664387	0.308834
lcl|NC_000909.1_cds_WP_010870744.1_1284	0.25125	0.681227	0.280057
lcl|NC_000909.1_cds_WP_010870746.1_1286	0.207617	0.691375	0.269677
lcl|NC_000909.1_cds_WP_010870747.1_1287	0.279125	0.739787	0.316644
lcl|NC_000909.1_cds_WP_010870748.1_1288	0.242344	0.676893	0.297876
lcl|NC_000909.1_cds_WP_010870749.1_1289	0.275729	0.662428	0.303547
lcl|NC_000909.1_cds_WP_010870750.1_1290	0.246172	0.682735	0.310389
lcl|NC_000909.1_cds_WP_010870751.1_1291	0.23525	0.727156	0.278442
lcl|NC_000909.1_cds_WP_010870752.1_1292	0.286437	0.654177	0.309277
lcl|NC_000909.1_cds_WP_010870755.1_1295	0.232133	0.683639	0.308458
lcl|NC_000909.1_cds_WP_010870756.1_1296	0.284112	0.643754	0.301943
lcl|NC_000909.1_cds_WP_010870757.1_1297	0.228645	0.676292	0.318384
lcl|NC_000909.1_cds_WP_010870760.1_1300	0.247155	0.702608	0.308598
lcl|NC_000909.1_cds_WP_010870761.1_1301	0.240263	0.662648	0.305981
lcl|NC_000909.1_cds_WP_010870762.1_1302	0.28669	0.642313	0.276313
lcl|NC_000909.1_cds_WP_010870763.1_1303	0.266332	0.690596	0.301254
lcl|NC_000909.1_cds_WP_010870765.1_1305	0.242914	0.661742	0.285721
lcl|NC_000909.1_cds_WP_010870766.1_1306	0.272054	0.616076	0.291098
lcl|NC_000909.1_cds_WP_010870767.1_1307	0.28326	0.665686	0.290723
lcl|NC_000909.1_cds_WP_010870769.1_1309	0.238563	0.643617	0.277419
lcl|NC_000909.1_cds_WP_010870770.1_1310	0.264277	0.64898	0.301121
lcl|NC_000909.1_cds_WP_010870771.1_1311	0.199532	0.595428	0.325272
lcl|NC_000909.1_cds_WP_010870773.1_1314	0.285528	0.732015	0.303977
lcl|NC_000909.1_cds_WP_010870776.1_1317	0.256891	0.674147	0.305255
lcl|NC_000909.1_cds_WP_010870777.1_1318	0.260567	0.70291	0.303357
lcl|NC_000909.1_cds_WP_010870778.1_1319	0.293091	0.734365	0.317201
lcl|NC_000909.1_cds_WP_010870779.1_1320	0.264543	0.6659	0.300199
lcl|NC_000909.1_cds_WP_010870783.1_1324	0.28869	0.653881	0.288717
lcl|NC_000909.1_cds_WP_010870784.1_1325	0.246257	0.650186	0.303971
lcl|NC_000909.1_cds_WP_010870785.1_1326	0.274829	0.665658	0.283329
lcl|NC_000909.1_cds_WP_010870786.1_1327	0.270052	0.729166	0.301598
lcl|NC_000909.1_cds_WP_010870787.1_1328	0.258409	0.675162	0.304904
lcl|NC_000909.1_cds_WP_010870788.1_1329	0.268842	0.588479	0.284476
lcl|NC_000909.1_cds_WP_010870791.1_1332	0.261408	0.698169	0.295463
lcl|NC_000909.1_cds_WP_010870793.1_1334	0.293481	0.660191	0.274324
lcl|NC_000909.1_cds_WP_010870795.1_1337	0.291775	0.667974	0.287905
lcl|NC_000909.1_cds_WP_010870796.1_1338	0.255656	0.606902	0.276058
lcl|NC_000909.1_cds_WP_010870799.1_1340	0.257644	0.653691	0.278785
lcl|NC_000909.1_cds_WP_010870800.1_1341	0.271923	0.680107	0.279791
lcl|NC_000909.1_cds_WP_010870804.1_1344	0.27488	0.647554	0.279675
lcl|NC_000909.1_cds_WP_010870805.1_1345	0.287963	0.644118	0.270417
lcl|NC_000909.1_cds_WP_010870806.1_1346	0.265817	0.659065	0.265784
lcl|NC_000909.1_cds_WP_010870807.1_1347	0.273332	0.627186	0.2816
lcl|NC_000909.1_cds_WP_010870811.1_1349	0.279301	0.704411	0.304924
lcl|NC_000909.1_cds_WP_010870812.1_1350	0.21532	0.612242	0.287555
lcl|NC_000909.1_cds_WP_010870815.1_1353	0.233149	0.633219	0.282756
lcl|NC_000909.1_cds_WP_010870819.1_1357	0.228089	0.630132	0.294512
lcl|NC_000909.1_cds_WP_010870821.1_1359	0.28612	0.644564	0.321567
lcl|NC_000909.1_cds_WP_010870822.1_1360	0.230891	0.672315	0.28216
lcl|NC_000909.1_cds_WP_010870823.1_1361	0.270578	0.628012	0.274628
lcl|NC_000909.1_cds_WP_010870824.1_1362	0.264089	0.622651	0.291414
lcl|NC_000909.1_cds_WP_010870826.1_1364	0.254467	0.568494	0.297619
lcl|NC_000909.1_cds_WP_010870829.1_1367	0.267851	0.7112	0.29344
lcl|NC_000909.1_cds_WP_010870830.1_1368	0.274261	0.705647	0.29025
lcl|NC_000909.1_cds_WP_010870831.1_1369	0.228377	0.63182	0.28092
lcl|NC_000909.1_cds_WP_010870834.1_1372	0.269412	0.624112	0.281295
lcl|NC_000909.1_cds_WP_010870836.1_1374	0.266563	0.594318	0.27471
lcl|NC_000909.1_cds_WP_010870837.1_1375	0.259675	0.735759	0.302388
lcl|NC_000909.1_cds_WP_010870838.1_1376	0.295407	0.692937	0.286583
lcl|NC_000909.1_cds_WP_010870839.1_1377	0.262575	0.68759	0.312032
lcl|NC_000909.1_cds_WP_010870840.1_1378	0.253478	0.719466	0.284564
lcl|NC_000909.1_cds_WP_010870841.1_1379	0.277055	0.639116	0.282936
lcl|NC_000909.1_cds_WP_010870842.1_1380	0.249745	0.692858	0.33468
lcl|NC_000909.1_cds_WP_010870848.1_1387	0.199061	0.631245	0.292092
lcl|NC_000909.1_cds_WP_010870850.1_1389	0.216337	0.668835	0.324757
lcl|NC_000909.1_cds_WP_010870851.1_1390	0.253426	0.503938	0.28846
lcl|NC_000909.1_cds_WP_010870852.1_1391	0.246515	0.663014	0.303968
lcl|NC_000909.1_cds_WP_010870855.1_1394	0.249789	0.727293	0.291422
lcl|NC_000909.1_cds_WP_010870857.1_1396	0.283274	0.692334	0.297518
lcl|NC_000909.1_cds_WP_010870858.1_1397	0.25639	0.611994	0.318988
lcl|NC_000909.1_cds_WP_010870859.1_1398	0.279514	0.735473	0.294961
lcl|NC_000909.1_cds_WP_010870862.1_1401	0.21087	0.65459	0.296026
lcl|NC_000909.1_cds_WP_010870863.1_1402	0.284827	0.642166	0.299143
lcl|NC_000909.1_cds_WP_010870866.1_1405	0.28403	0.706081	0.287852
lcl|NC_000909.1_cds_WP_010870869.1_1408	0.271213	0.691108	0.305916
lcl|NC_000909.1_cds_WP_010870871.1_1412	0.284425	0.569662	0.305144
lcl|NC_000909.1_cds_WP_010870872.1_1413	0.246237	0.697222	0.325347
lcl|NC_000909.1_cds_WP_010870873.1_1414	0.242059	0.693688	0.307121
lcl|NC_000909.1_cds_WP_010870874.1_1415	0.224769	0.607511	0.294969
lcl|NC_000909.1_cds_WP_010870875.1_1416	0.271086	0.624111	0.288747
lcl|NC_000909.1_cds_WP_010870876.1_1417	0.233932	0.637773	0.294301
lcl|NC_000909.1_cds_WP_010870878.1_1419	0.264	0.679485	0.283539
lcl|NC_000909.1_cds_WP_010870879.1_1420	0.227609	0.597153	0.298899
lcl|NC_000909.1_cds_WP_010870882.1_1423	0.244434	0.635734	0.298143
lcl|NC_000909.1_cds_WP_010870884.1_1425	0.251524	0.695591	0.276478
lcl|NC_000909.1_cds_WP_010870887.1_1428	0.241836	0.688555	0.292474
lcl|NC_000909.1_cds_WP_010870889.1_1430	0.241997	0.687801	0.294959
lcl|NC_000909.1_cds_WP_010870890.1_1431	0.287822	0.666033	0.270165
lcl|NC_000909.1_cds_WP_010870891.1_1432	0.246248	0.599875	0.29821
lcl|NC_000909.1_cds_WP_010870892.1_1433	0.27356	0.627292	0.279219
lcl|NC_000909.1_cds_WP_010870893.1_1434	0.276807	0.638571	0.294769
lcl|NC_000909.1_cds_WP_010870894.1_1435	0.246751	0.697201	0.304853
lcl|NC_000909.1_cds_WP_010870895.1_1436	0.243672	0.666458	0.298767
lcl|NC_000909.1_cds_WP_010870896.1_1438	0.259822	0.657506	0.29764
lcl|NC_000909.1_cds_WP_010870897.1_1439	0.273237	0.619322	0.288872
lcl|NC_000909.1_cds_WP_010870898.1_1440	0.229144	0.646916	0.302298
lcl|NC_000909.1_cds_WP_010870899.1_1441	0.234019	0.719515	0.297989
lcl|NC_000909.1_cds_WP_010870900.1_1442	0.193873	0.664685	0.294295
lcl|NC_000909.1_cds_WP_010870902.1_1444	0.263248	0.727251	0.297938
lcl|NC_000909.1_cds_WP_010870904.1_1445	0.251114	0.716789	0.273879
lcl|NC_000909.1_cds_WP_010870905.1_1446	0.26736	0.692109	0.31339
lcl|NC_000909.1_cds_WP_010870906.1_1447	0.28905	0.669612	0.295054
lcl|NC_000909.1_cds_WP_010870907.1_1448	0.264449	0.623092	0.283712
lcl|NC_000909.1_cds_WP_010870908.1_1449	0.244697	0.702222	0.307284
lcl|NC_000909.1_cds_WP_010870909.1_1450	0.266843	0.701069	0.295213
lcl|NC_000909.1_cds_WP_010870910.1_1451	0.285308	0.599986	0.294135
lcl|NC_000909.1_cds_WP_010870911.1_1452	0.276771	0.620471	0.283975
lcl|NC_000909.1_cds_WP_010870913.1_1454	0.275304	0.638254	0.279761
lcl|NC_000909.1_cds_WP_010870914.1_1455	0.274846	0.62291	0.277131
lcl|NC_000909.1_cds_WP_010870915.1_1457	0.2706	0.587197	0.279864
lcl|NC_000909.1_cds_WP_010870916.1_1458	0.264875	0.719666	0.299894
lcl|NC_000909.1_cds_WP_010870917.1_1459	0.298603	0.688118	0.289762
lcl|NC_000909.1_cds_WP_010870918.1_1460	0.237222	0.700211	0.297409
lcl|NC_000909.1_cds_WP_010870919.1_1462	0.310738	0.685145	0.29734
lcl|NC_000909.1_cds_WP_010870920.1_1463	0.288441	0.636791	0.302487
lcl|NC_000909.1_cds_WP_010870924.1_1468	0.261707	0.663787	0.274818
lcl|NC_000909.1_cds_WP_010870925.1_1469	0.228278	0.655243	0.308571
lcl|NC_000909.1_cds_WP_010870927.1_1471	0.270865	0.684878	0.287366
lcl|NC_000909.1_cds_WP_010870928.1_1472	0.251162	0.662671	0.296107
lcl|NC_000909.1_cds_WP_010870931.1_1475	0.256733	0.703152	0.2926
lcl|NC_000909.1_cds_WP_010870934.1_1478	0.251922	0.655461	0.293651
lcl|NC_000909.1_cds_WP_010870935.1_1479	0.276573	0.683598	0.298905
lcl|NC_000909.1_cds_WP_010870936.1_1481	0.265905	0.650115	0.2891
lcl|NC_000909.1_cds_WP_010870940.1_1487	0.257407	0.686497	0.306529
lcl|NC_000909.1_cds_WP_010870941.1_1488	0.246146	0.703496	0.291534
lcl|NC_000909.1_cds_WP_010870943.1_1490	0.246513	0.733054	0.295286
lcl|NC_000909.1_cds_WP_010870945.1_1492	0.282341	0.696906	0.280538
lcl|NC_000909.1_cds_WP_010870946.1_1493	0.284381	0.620031	0.302007
lcl|NC_000909.1_cds_WP_010870947.1_1494	0.269083	0.63537	0.296495
lcl|NC_000909.1_cds_WP_010870948.1_1495	0.28738	0.762657	0.310723
lcl|NC_000909.1_cds_WP_010870949.1_1496	0.250188	0.690767	0.299148
lcl|NC_000909.1_cds_WP_010870950.1_1497	0.283516	0.736538	0.303194
lcl|NC_000909.1_cds_WP_010870951.1_1498	0.259734	0.681213	0.287067
lcl|NC_000909.1_cds_WP_010870953.1_1500	0.243071	0.646039	0.307724
lcl|NC_000909.1_cds_WP_010870954.1_1501	0.243487	0.67062	0.30205
lcl|NC_000909.1_cds_WP_010870955.1_1502	0.252941	0.696151	0.300925
lcl|NC_000909.1_cds_WP_010870957.1_1504	0.264509	0.636631	0.283434
lcl|NC_000909.1_cds_WP_010870958.1_1505	0.274202	0.714847	0.281285
lcl|NC_000909.1_cds_WP_010870959.1_1506	0.23576	0.640423	0.301286
lcl|NC_000909.1_cds_WP_010870963.1_1508	0.252587	0.579308	0.311173
lcl|NC_000909.1_cds_WP_010870964.1_1509	0.227068	0.660569	0.298998
lcl|NC_000909.1_cds_WP_010870965.1_1510	0.250244	0.639454	0.278253
lcl|NC_000909.1_cds_WP_010870966.1_1511	0.250283	0.712217	0.298316
lcl|NC_000909.1_cds_WP_010870967.1_1512	0.247262	0.691246	0.298281
lcl|NC_000909.1_cds_WP_010870968.1_1513	0.263929	0.714724	0.297895
lcl|NC_000909.1_cds_WP_010870969.1_1514	0.297233	0.745174	0.296301
lcl|NC_000909.1_cds_WP_010870970.1_1515	0.252708	0.608466	0.290317
lcl|NC_000909.1_cds_WP_010870971.1_1516	0.247797	0.656626	0.30127
lcl|NC_000909.1_cds_WP_010870972.1_1517	0.260235	0.691323	0.293926
lcl|NC_000909.1_cds_WP_010870973.1_1518	0.285021	0.6693	0.288026
lcl|NC_000909.1_cds_WP_010870974.1_1519	0.268326	0.6685	0.302177
lcl|NC_000909.1_cds_WP_010870975.1_1520	0.23453	0.663661	0.315439
lcl|NC_000909.1_cds_WP_010870977.1_1522	0.284455	0.675977	0.290115
lcl|NC_000909.1_cds_WP_010870978.1_1523	0.232525	0.585314	0.298204
lcl|NC_000909.1_cds_WP_010870980.1_1525	0.29461	0.709568	0.306203
lcl|NC_000909.1_cds_WP_010870981.1_1526	0.25768	0.68019	0.319209
lcl|NC_000909.1_cds_WP_010870983.1_1528	0.256906	0.697366	0.319609
lcl|NC_000909.1_cds_WP_010870985.1_1530	0.264443	0.696173	0.302139
lcl|NC_000909.1_cds_WP_010870986.1_1531	0.221498	0.460004	0.319108
lcl|NC_000909.1_cds_WP_010870987.1_1532	0.261999	0.60927	0.277216
lcl|NC_000909.1_cds_WP_010870988.1_1533	0.285199	0.645073	0.273489
lcl|NC_000909.1_cds_WP_010870989.1_1534	0.243342	0.595132	0.301818
lcl|NC_000909.1_cds_WP_010870990.1_1535	0.28845	0.664295	0.278612
lcl|NC_000909.1_cds_WP_010870991.1_1536	0.285622	0.654337	0.267
lcl|NC_000909.1_cds_WP_010870992.1_1537	0.291073	0.594094	0.265997
lcl|NC_000909.1_cds_WP_010870993.1_1538	0.303275	0.634951	0.281435
lcl|NC_000909.1_cds_WP_010870996.1_1541	0.206644	0.716692	0.303227
lcl|NC_000909.1_cds_WP_010870998.1_1543	0.272405	0.704156	0.29436
lcl|NC_000909.1_cds_WP_010871000.1_1545	0.259758	0.637958	0.296123
lcl|NC_000909.1_cds_WP_010871002.1_1547	0.232941	0.657442	0.303008
lcl|NC_000909.1_cds_WP_010871003.1_1548	0.247175	0.681222	0.30425
lcl|NC_000909.1_cds_WP_010871004.1_1549	0.235486	0.624106	0.303883
lcl|NC_000909.1_cds_WP_010871006.1_1551	0.254994	0.642634	0.280044
lcl|NC_000909.1_cds_WP_010871007.1_1552	0.280885	0.647922	0.277615
lcl|NC_000909.1_cds_WP_010871009.1_1554	0.25749	0.672135	0.276955
lcl|NC_000909.1_cds_WP_010871010.1_1555	0.253488	0.692581	0.286439
lcl|NC_000909.1_cds_WP_010871012.1_1557	0.259225	0.583833	0.268106
lcl|NC_000909.1_cds_WP_010871013.1_1558	0.277602	0.686779	0.280749
lcl|NC_000909.1_cds_WP_010871015.1_1560	0.277395	0.659578	0.269628
lcl|NC_000909.1_cds_WP_010871017.1_1562	0.220994	0.632564	0.308549
lcl|NC_000909.1_cds_WP_010871020.1_1565	0.272689	0.682603	0.27683
lcl|NC_000909.1_cds_WP_010871021.1_1566	0.278342	0.689467	0.283376
lcl|NC_000909.1_cds_WP_010871022.1_1567	0.260506	0.615729	0.289452
lcl|NC_000909.1_cds_WP_010871023.1_1568	0.265972	0.703656	0.277745
lcl|NC_000909.1_cds_WP_010871024.1_1569	0.236925	0.703214	0.290482
lcl|NC_000909.1_cds_WP_010871026.1_1571	0.26184	0.703534	0.30263
lcl|NC_000909.1_cds_WP_010871027.1_1572	0.262523	0.660941	0.28747
lcl|NC_000909.1_cds_WP_010871028.1_1573	0.24607	0.696668	0.308414
lcl|NC_000909.1_cds_WP_010871029.1_1574	0.252984	0.681639	0.276789
lcl|NC_000909.1_cds_WP_010871032.1_1577	0.263545	0.709007	0.33066
lcl|NC_000909.1_cds_WP_010871033.1_1578	0.258879	0.63217	0.304361
lcl|NC_000909.1_cds_WP_010871034.1_1579	0.197701	0.688397	0.345216
lcl|NC_000909.1_cds_WP_010871035.1_1580	0.234921	0.649267	0.303308
lcl|NC_000909.1_cds_WP_010871037.1_1582	0.2509	0.612767	0.285174
lcl|NC_000909.1_cds_WP_010871038.1_1583	0.226866	0.618032	0.290319
lcl|NC_000909.1_cds_WP_010871041.1_1587	0.206222	0.6094	0.296472
lcl|NC_000909.1_cds_WP_010871043.1_1589	0.289513	0.711929	0.301495
lcl|NC_000909.1_cds_WP_010871044.1_1590	0.23804	0.663942	0.278964
lcl|NC_000909.1_cds_WP_010871045.1_1591	0.279179	0.580143	0.297148
lcl|NC_000909.1_cds_WP_010871046.1_1592	0.280666	0.761165	0.290779
lcl|NC_000909.1_cds_WP_010871047.1_1593	0.282309	0.671894	0.269051
lcl|NC_000909.1_cds_WP_010871048.1_1594	0.241005	0.641802	0.290923
lcl|NC_000909.1_cds_WP_010871049.1_1595	0.27401	0.628139	0.295889
lcl|NC_000909.1_cds_WP_010871050.1_1596	0.261411	0.658751	0.293756
lcl|NC_000909.1_cds_WP_010871051.1_1597	0.225698	0.605004	0.294771
lcl|NC_000909.1_cds_WP_010871052.1_1598	0.262316	0.689398	0.284512
lcl|NC_000909.1_cds_WP_010871053.1_1599	0.270938	0.712767	0.294422
lcl|NC_000909.1_cds_WP_010871054.1_1600	0.231555	0.603305	0.298848
lcl|NC_000909.1_cds_WP_010871055.1_1601	0.279415	0.690697	0.30194
lcl|NC_000909.1_cds_WP_010871056.1_1602	0.256062	0.709903	0.287826
lcl|NC_000909.1_cds_WP_010871058.1_1604	0.285849	0.73118	0.316463
lcl|NC_000909.1_cds_WP_010871059.1_1605	0.293559	0.695352	0.291099
lcl|NC_000909.1_cds_WP_010871060.1_1606	0.263883	0.705979	0.294042
lcl|NC_000909.1_cds_WP_010871064.1_1610	0.242384	0.726387	0.28407
lcl|NC_000909.1_cds_WP_010871065.1_1611	0.257933	0.64811	0.305916
lcl|NC_000909.1_cds_WP_010871066.1_1612	0.269285	0.636269	0.290171
lcl|NC_000909.1_cds_WP_010871070.1_1616	0.272904	0.65045	0.307799
lcl|NC_000909.1_cds_WP_010871071.1_1617	0.233771	0.626481	0.306359
lcl|NC_000909.1_cds_WP_010871073.1_1619	0.240939	0.636277	0.296904
lcl|NC_000909.1_cds_WP_010871074.1_1621	0.233255	0.55384	0.304733
lcl|NC_000909.1_cds_WP_010871075.1_1622	0.231922	0.749309	0.284861
lcl|NC_000909.1_cds_WP_010871077.1_1624	0.253493	0.668404	0.291521
lcl|NC_000909.1_cds_WP_010871078.1_1625	0.283454	0.646011	0.292642
lcl|NC_000909.1_cds_WP_010871080.1_1627	0.252423	0.623182	0.284963
lcl|NC_000909.1_cds_WP_010871082.1_1629	0.292943	0.633671	0.299025
lcl|NC_000909.1_cds_WP_010871083.1_1630	0.245654	0.698039	0.289411
lcl|NC_000909.1_cds_WP_010871084.1_1631	0.287511	0.642376	0.281679
lcl|NC_000909.1_cds_WP_010871085.1_1632	0.267264	0.650178	0.281069
lcl|NC_000909.1_cds_WP_010871086.1_1633	0.266302	0.552061	0.308291
lcl|NC_000909.1_cds_WP_010871088.1_1635	0.253947	0.714045	0.317723
lcl|NC_000909.1_cds_WP_010871089.1_1636	0.246144	0.671111	0.293752
lcl|NC_000909.1_cds_WP_010871090.1_1637	0.258214	0.671365	0.294323
lcl|NC_000909.1_cds_WP_010871092.1_1639	0.251785	0.710615	0.304017
lcl|NC_000909.1_cds_WP_010871093.1_1641	0.256566	0.626448	0.30419
lcl|NC_000909.1_cds_WP_010871094.1_1642	0.289473	0.577827	0.301973
lcl|NC_000909.1_cds_WP_010871096.1_1644	0.278386	0.66914	0.28684
lcl|NC_000909.1_cds_WP_010871100.1_1646	0.245466	0.720743	0.28469
lcl|NC_000909.1_cds_WP_010871101.1_1647	0.217222	0.650177	0.315238
lcl|NC_000909.1_cds_WP_010871102.1_1648	0.26062	0.598656	0.28785
lcl|NC_000909.1_cds_WP_010871103.1_1649	0.259243	0.666369	0.301549
lcl|NC_000909.1_cds_WP_010871104.1_1650	0.205846	0.637676	0.335372
lcl|NC_000909.1_cds_WP_010871106.1_1652	0.225618	0.669139	0.295694
lcl|NC_000909.1_cds_WP_010871107.1_1653	0.234845	0.645253	0.299234
lcl|NC_000909.1_cds_WP_010871108.1_1654	0.252766	0.608515	0.277373
lcl|NC_000909.1_cds_WP_010871109.1_1655	0.262223	0.646604	0.295501
lcl|NC_000909.1_cds_WP_010871114.1_1659	0.272138	0.636133	0.272849
lcl|NC_000909.1_cds_WP_010871116.1_1662	0.236588	0.699439	0.295253
lcl|NC_000909.1_cds_WP_010871117.1_1663	0.276956	0.761256	0.328716
lcl|NC_000909.1_cds_WP_010871118.1_1664	0.22555	0.782444	0.288372
lcl|NC_000909.1_cds_WP_010871121.1_1667	0.253	0.719962	0.300456
lcl|NC_000909.1_cds_WP_010871124.1_1669	0.236779	0.712394	0.306932
lcl|NC_000909.1_cds_WP_010871125.1_1670	0.26798	0.627196	0.267332
lcl|NC_000909.1_cds_WP_010871126.1_1671	0.247749	0.727179	0.299766
lcl|NC_000909.1_cds_WP_010871127.1_1672	0.276148	0.741925	0.301016
lcl|NC_000909.1_cds_WP_010871128.1_1673	0.304239	0.682139	0.304362
lcl|NC_000909.1_cds_WP_010871130.1_1675	0.277822	0.677423	0.290649
lcl|NC_000909.1_cds_WP_010871131.1_1676	0.282165	0.618006	0.291259
lcl|NC_000909.1_cds_WP_010871132.1_1677	0.26099	0.61447	0.296353
lcl|NC_000909.1_cds_WP_010871133.1_1678	0.24138	0.583213	0.340833
lcl|NC_000909.1_cds_WP_010871134.1_1679	0.253359	0.689869	0.282208
lcl|NC_000909.1_cds_WP_010871136.1_1681	0.241534	0.653473	0.292754
lcl|NC_000909.1_cds_WP_010871137.1_1682	0.22414	0.656102	0.299805
lcl|NC_000909.1_cds_WP_010871138.1_1683	0.256814	0.695429	0.305726
lcl|NC_000909.1_cds_WP_010871139.1_1684	0.267965	0.699633	0.282556
lcl|NC_000909.1_cds_WP_010871140.1_1685	0.247273	0.540459	0.31215
lcl|NC_000909.1_cds_WP_010871141.1_1686	0.263402	0.662052	0.301788
lcl|NC_000909.1_cds_WP_010871144.1_1689	0.285942	0.640672	0.292417
lcl|NC_000909.1_cds_WP_010871145.1_1690	0.26687	0.684017	0.288361
lcl|NC_000909.1_cds_WP_010871147.1_1693	0.2513	0.652361	0.294755
lcl|NC_000909.1_cds_WP_010871150.1_1696	0.230265	0.681107	0.298509
lcl|NC_000909.1_cds_WP_010871151.1_1697	0.235643	0.68828	0.301687
lcl|NC_000909.1_cds_WP_010871152.1_1698	0.241371	0.620661	0.285085
lcl|NC_000909.1_cds_WP_010871153.1_1699	0.23828	0.660236	0.292498
lcl|NC_000909.1_cds_WP_010871155.1_1702	0.283503	0.660585	0.298515
lcl|NC_000909.1_cds_WP_010871156.1_1703	0.264189	0.655511	0.275779
lcl|NC_000909.1_cds_WP_010871158.1_1705	0.265166	0.690466	0.286224
lcl|NC_000909.1_cds_WP_010871159.1_1706	0.252082	0.55687	0.290662
lcl|NC_000909.1_cds_WP_010871160.1_1707	0.276641	0.662764	0.298447
lcl|NC_000909.1_cds_WP_010871161.1_1708	0.253299	0.596772	0.294276
lcl|NC_000909.1_cds_WP_010871162.1_1709	0.24285	0.680966	0.291747
lcl|NC_000909.1_cds_WP_010871163.1_1710	0.273994	0.596866	0.270016
lcl|NC_000909.1_cds_WP_010871164.1_1711	0.23924	0.678898	0.280609
lcl|NC_000909.1_cds_WP_010871166.1_1713	0.280438	0.678552	0.277744
lcl|NC_000909.1_cds_WP_010871167.1_1714	0.198212	0.635455	0.31583
lcl|NC_000909.1_cds_WP_010871168.1_1715	0.264233	0.62548	0.265506
lcl|NC_000909.1_cds_WP_010871169.1_1716	0.247728	0.670965	0.306273
lcl|NC_000909.1_cds_WP_010871171.1_1718	0.256344	0.700965	0.333683
lcl|NC_000909.1_cds_WP_010871172.1_1719	0.28753	0.711744	0.29102
lcl|NC_000909.1_cds_WP_010871177.1_1724	0.2394	0.694826	0.293843
lcl|NC_000909.1_cds_WP_010871178.1_1725	0.247474	0.633475	0.305581
lcl|NC_000909.1_cds_WP_010871179.1_1726	0.249877	0.661749	0.300855
lcl|NC_000909.1_cds_WP_010871181.1_1728	0.231886	0.580887	0.293298
lcl|NC_000909.1_cds_WP_010871182.1_1729	0.18147	0.644986	0.277862
lcl|NC_000909.1_cds_WP_010871183.1_1730	0.230185	0.64973	0.282129
lcl|NC_000909.1_cds_WP_010871185.1_1732	0.249436	0.711203	0.292795
lcl|NC_000909.1_cds_WP_010871186.1_1733	0.258101	0.665385	0.31499
lcl|NC_000909.1_cds_WP_010871187.1_1734	0.252805	0.609243	0.287434
lcl|NC_000909.1_cds_WP_010871188.1_1735	0.246813	0.645557	0.277786
lcl|NC_000909.1_cds_WP_010871189.1_1736	0.259813	0.682774	0.305433
lcl|NC_000909.1_cds_WP_010871190.1_1737	0.2865	0.683557	0.292392
lcl|NC_000909.1_cds_WP_010871192.1_1739	0.249325	0.695411	0.293063
lcl|NC_000909.1_cds_WP_010871193.1_1740	0.259896	0.70932	0.301299
lcl|NC_000909.1_cds_WP_010871194.1_1741	0.262265	0.695232	0.302321
lcl|NC_000909.1_cds_WP_010871197.1_1743	0.291416	0.695944	0.26763
lcl|NC_000909.1_cds_WP_010871198.1_1744	0.248435	0.666276	0.291206
lcl|NC_000909.1_cds_WP_010871199.1_1745	0.255285	0.631627	0.303373
lcl|NC_000909.1_cds_WP_010871200.1_1746	0.285137	0.638656	0.278658
lcl|NC_000909.1_cds_WP_010871201.1_1747	0.237362	0.61869	0.297389
lcl|NC_000909.1_cds_WP_010871203.1_1749	0.25888	0.718279	0.327281
lcl|NC_000909.1_cds_WP_010871204.1_1750	0.299634	0.698454	0.270293
lcl|NC_000909.1_cds_WP_010871205.1_1751	0.258362	0.663639	0.300594
lcl|NC_000909.1_cds_WP_010871206.1_1752	0.26728	0.651123	0.321642
lcl|NC_000909.1_cds_WP_012980417.1_1242	0.319676	0.710954	0.312501
lcl|NC_000909.1_cds_WP_012980426.1_1252	0.328456	0.79839	0.298024
lcl|NC_000909.1_cds_WP_012980461.1_1482	0.26208	0.699584	0.318155
lcl|NC_000909.1_cds_WP_012981234.1_1086	0.260728	0.605453	0.308154
lcl|NC_000909.1_cds_WP_012981301.1_470	0.258281	0.685055	0.312944
lcl|NC_000909.1_cds_WP_012981369.1_254	0.187989	0.688654	0.304866
lcl|NC_000909.1_cds_WP_048196713.1_765	0.287732	0.629678	0.307525
lcl|NC_000909.1_cds_WP_048201890.1_331	0.271329	0.726065	0.312911
lcl|NC_000909.1_cds_WP_048202361.1_521	0.263397	0.694291	0.29969
lcl|NC_000909.1_cds_WP_064496362.1_6	0.232626	0.64211	0.30092
lcl|NC_000909.1_cds_WP_064496363.1_8	0.228291	0.674194	0.318653
lcl|NC_000909.1_cds_WP_064496367.1_26	0.273976	0.738467	0.296946
lcl|NC_000909.1_cds_WP_064496369.1_30	0.261275	0.679413	0.286807
lcl|NC_000909.1_cds_WP_064496370.1_31	0.293187	0.662844	0.299044
lcl|NC_000909.1_cds_WP_064496371.1_32	0.263307	0.687108	0.309831
lcl|NC_000909.1_cds_WP_064496372.1_35	0.227554	0.659697	0.305881
lcl|NC_000909.1_cds_WP_064496373.1_39	0.260577	0.730112	0.316286
lcl|NC_000909.1_cds_WP_064496374.1_41	0.255946	0.680493	0.3017
lcl|NC_000909.1_cds_WP_064496375.1_48	0.295879	0.59833	0.289302
lcl|NC_000909.1_cds_WP_064496376.1_50	0.240066	0.659071	0.328639
lcl|NC_000909.1_cds_WP_064496377.1_51	0.264617	0.635884	0.294348
lcl|NC_000909.1_cds_WP_064496378.1_54	0.250211	0.715324	0.306535
lcl|NC_000909.1_cds_WP_064496379.1_57	0.230043	0.655702	0.28909
lcl|NC_000909.1_cds_WP_064496380.1_59	0.265677	0.673411	0.286943
lcl|NC_000909.1_cds_WP_064496382.1_65	0.318946	0.67076	0.300504
lcl|NC_000909.1_cds_WP_064496383.1_67	0.246367	0.690351	0.297818
lcl|NC_000909.1_cds_WP_064496385.1_79	0.236663	0.652274	0.301528
lcl|NC_000909.1_cds_WP_064496386.1_89	0.230222	0.669221	0.285555
lcl|NC_000909.1_cds_WP_064496387.1_90	0.24406	0.679255	0.291018
lcl|NC_000909.1_cds_WP_064496388.1_94	0.244719	0.666597	0.299093
lcl|NC_000909.1_cds_WP_064496389.1_95	0.225382	0.683536	0.292393
lcl|NC_000909.1_cds_WP_064496390.1_100	0.254657	0.665015	0.29153
lcl|NC_000909.1_cds_WP_064496391.1_104	0.232497	0.663969	0.309594
lcl|NC_000909.1_cds_WP_064496393.1_106	0.271263	0.62912	0.304651
lcl|NC_000909.1_cds_WP_064496394.1_108	0.242095	0.679068	0.301515
lcl|NC_000909.1_cds_WP_064496395.1_110	0.24967	0.58186	0.294537
lcl|NC_000909.1_cds_WP_064496397.1_116	0.24706	0.699114	0.302408
lcl|NC_000909.1_cds_WP_064496398.1_117	0.257849	0.737096	0.323006
lcl|NC_000909.1_cds_WP_064496399.1_118	0.22509	0.692495	0.315217
lcl|NC_000909.1_cds_WP_064496401.1_120	0.260843	0.673769	0.289773
lcl|NC_000909.1_cds_WP_064496402.1_130	0.276796	0.607297	0.272753
lcl|NC_000909.1_cds_WP_064496404.1_135	0.244789	0.703938	0.280599
lcl|NC_000909.1_cds_WP_064496405.1_139	0.247776	0.681887	0.301001
lcl|NC_000909.1_cds_WP_064496406.1_151	0.263271	0.659042	0.288015
lcl|NC_000909.1_cds_WP_064496407.1_153	0.280957	0.648326	0.295924
lcl|NC_000909.1_cds_WP_064496408.1_160	0.277685	0.671146	0.302463
lcl|NC_000909.1_cds_WP_064496409.1_162	0.242909	0.639325	0.292986
lcl|NC_000909.1_cds_WP_064496410.1_163	0.23798	0.664472	0.311033
lcl|NC_000909.1_cds_WP_064496411.1_164	0.241011	0.694499	0.29863
lcl|NC_000909.1_cds_WP_064496413.1_172	0.279151	0.679556	0.288627
lcl|NC_000909.1_cds_WP_064496414.1_173	0.23623	0.602633	0.288502
lcl|NC_000909.1_cds_WP_064496415.1_176	0.272206	0.673741	0.316113
lcl|NC_000909.1_cds_WP_064496416.1_178	0.255369	0.686926	0.304617
lcl|NC_000909.1_cds_WP_064496417.1_186	0.275353	0.630738	0.288416
lcl|NC_000909.1_cds_WP_064496418.1_200	0.331167	0.700753	0.306625
lcl|NC_000909.1_cds_WP_064496419.1_203	0.238069	0.675249	0.297662
lcl|NC_000909.1_cds_WP_064496420.1_206	0.250468	0.666574	0.311105
lcl|NC_000909.1_cds_WP_064496422.1_210	0.240817	0.74474	0.302177
lcl|NC_000909.1_cds_WP_064496423.1_217	0.214725	0.618876	0.292516
lcl|NC_000909.1_cds_WP_064496424.1_219	0.268296	0.716046	0.324163
lcl|NC_000909.1_cds_WP_064496425.1_222	0.245992	0.716195	0.352228
lcl|NC_000909.1_cds_WP_064496427.1_227	0.263528	0.667704	0.298183
lcl|NC_000909.1_cds_WP_064496428.1_228	0.274071	0.774506	0.295438
lcl|NC_000909.1_cds_WP_064496429.1_230	0.287904	0.687215	0.253916
lcl|NC_000909.1_cds_WP_064496430.1_231	0.308598	0.715469	0.288607
lcl|NC_000909.1_cds_WP_064496432.1_240	0.251634	0.676371	0.283168
lcl|NC_000909.1_cds_WP_064496433.1_243	0.282907	0.652596	0.304699
lcl|NC_000909.1_cds_WP_064496434.1_249	0.273488	0.805251	0.306938
lcl|NC_000909.1_cds_WP_064496435.1_252	0.266008	0.658583	0.278415
lcl|NC_000909.1_cds_WP_064496436.1_256	0.255718	0.709023	0.296196
lcl|NC_000909.1_cds_WP_064496437.1_260	0.282089	0.639495	0.310411
lcl|NC_000909.1_cds_WP_064496438.1_261	0.256854	0.66134	0.283126
lcl|NC_000909.1_cds_WP_064496439.1_263	0.259375	0.709971	0.275024
lcl|NC_000909.1_cds_WP_064496440.1_265	0.268983	0.625439	0.275844
lcl|NC_000909.1_cds_WP_064496441.1_266	0.240993	0.671476	0.285603
lcl|NC_000909.1_cds_WP_064496443.1_270	0.272086	0.68288	0.290039
lcl|NC_000909.1_cds_WP_064496444.1_271	0.258222	0.683589	0.306035
lcl|NC_000909.1_cds_WP_064496445.1_272	0.256881	0.705966	0.30496
lcl|NC_000909.1_cds_WP_064496446.1_275	0.25184	0.58015	0.294463
lcl|NC_000909.1_cds_WP_064496447.1_276	0.283524	0.648154	0.284419
lcl|NC_000909.1_cds_WP_064496448.1_278	0.199698	0.627025	0.292786
lcl|NC_000909.1_cds_WP_064496449.1_282	0.29243	0.714501	0.289682
lcl|NC_000909.1_cds_WP_064496450.1_287	0.253071	0.611467	0.274975
lcl|NC_000909.1_cds_WP_064496452.1_290	0.283762	0.667575	0.316435
lcl|NC_000909.1_cds_WP_064496454.1_300	0.294419	0.646236	0.275357
lcl|NC_000909.1_cds_WP_064496455.1_301	0.264775	0.746881	0.287739
lcl|NC_000909.1_cds_WP_064496456.1_305	0.267065	0.665091	0.275663
lcl|NC_000909.1_cds_WP_064496457.1_308	0.261415	0.68915	0.31866
lcl|NC_000909.1_cds_WP_064496458.1_312	0.221296	0.670914	0.302525
lcl|NC_000909.1_cds_WP_064496460.1_315	0.260472	0.667746	0.308016
lcl|NC_000909.1_cds_WP_064496461.1_324	0.265095	0.611818	0.31284
lcl|NC_000909.1_cds_WP_064496462.1_329	0.221733	0.664418	0.30425
lcl|NC_000909.1_cds_WP_064496463.1_334	0.270979	0.605504	0.289586
lcl|NC_000909.1_cds_WP_064496465.1_338	0.280038	0.564286	0.310162
lcl|NC_000909.1_cds_WP_064496467.1_346	0.257098	0.645664	0.305314
lcl|NC_000909.1_cds_WP_064496468.1_358	0.289167	0.575441	0.290509
lcl|NC_000909.1_cds_WP_064496469.1_363	0.129013	0.463495	0.283524
lcl|NC_000909.1_cds_WP_064496470.1_366	0.25745	0.598381	0.267725
lcl|NC_000909.1_cds_WP_064496471.1_369	0.218844	0.545438	0.312606
lcl|NC_000909.1_cds_WP_064496472.1_371	0.30422	0.51702	0.291199
lcl|NC_000909.1_cds_WP_064496473.1_375	0.257294	0.664269	0.274752
lcl|NC_000909.1_cds_WP_064496474.1_377	0.1624	0.547135	0.308027
lcl|NC_000909.1_cds_WP_064496475.1_385	0.2942	0.694556	0.277214
lcl|NC_000909.1_cds_WP_064496476.1_386	0.240387	0.665273	0.289234
lcl|NC_000909.1_cds_WP_064496477.1_390	0.324032	0.644193	0.287407
lcl|NC_000909.1_cds_WP_064496478.1_393	0.276295	0.577016	0.304931
lcl|NC_000909.1_cds_WP_064496479.1_395	0.264014	0.625857	0.284281
lcl|NC_000909.1_cds_WP_064496481.1_402	0.27345	0.769117	0.275939
lcl|NC_000909.1_cds_WP_064496482.1_410	0.275889	0.698972	0.295913
lcl|NC_000909.1_cds_WP_064496483.1_415	0.284632	0.724538	0.294301
lcl|NC_000909.1_cds_WP_064496484.1_417	0.289534	0.648318	0.282383
lcl|NC_000909.1_cds_WP_064496485.1_418	0.255579	0.622854	0.289861
lcl|NC_000909.1_cds_WP_064496486.1_419	0.242491	0.714109	0.306551
lcl|NC_000909.1_cds_WP_064496487.1_425	0.26708	0.597359	0.304646
lcl|NC_000909.1_cds_WP_064496489.1_430	0.257636	0.698854	0.275664
lcl|NC_000909.1_cds_WP_064496490.1_434	0.242377	0.735226	0.286197
lcl|NC_000909.1_cds_WP_064496493.1_438	0.220188	0.581403	0.31037
lcl|NC_000909.1_cds_WP_064496494.1_442	0.297671	0.783299	0.296001
lcl|NC_000909.1_cds_WP_064496495.1_450	0.249434	0.686865	0.288267
lcl|NC_000909.1_cds_WP_064496496.1_451	0.241452	0.659088	0.273309
lcl|NC_000909.1_cds_WP_064496497.1_454	0.213804	0.687968	0.305882
lcl|NC_000909.1_cds_WP_064496498.1_457	0.218228	0.671444	0.3139
lcl|NC_000909.1_cds_WP_064496499.1_459	0.262623	0.711378	0.280988
lcl|NC_000909.1_cds_WP_064496500.1_462	0.241028	0.648287	0.295002
lcl|NC_000909.1_cds_WP_064496502.1_472	0.276285	0.704793	0.325054
lcl|NC_000909.1_cds_WP_064496503.1_475	0.27147	0.69649	0.293116
lcl|NC_000909.1_cds_WP_064496504.1_486	0.268587	0.682169	0.316531
lcl|NC_000909.1_cds_WP_064496505.1_491	0.292575	0.737602	0.256334
lcl|NC_000909.1_cds_WP_064496506.1_493	0.258834	0.692524	0.316111
lcl|NC_000909.1_cds_WP_064496507.1_495	0.250427	0.681563	0.300795
lcl|NC_000909.1_cds_WP_064496508.1_497	0.275601	0.703131	0.285818
lcl|NC_000909.1_cds_WP_064496509.1_500	0.246393	0.671326	0.295841
lcl|NC_000909.1_cds_WP_064496510.1_502	0.245995	0.705286	0.300117
lcl|NC_000909.1_cds_WP_064496511.1_503	0.263539	0.69822	0.291731
lcl|NC_000909.1_cds_WP_064496512.1_505	0.243002	0.720032	0.289987
lcl|NC_000909.1_cds_WP_064496513.1_508	0.23539	0.691933	0.292987
lcl|NC_000909.1_cds_WP_064496514.1_512	0.228873	0.727709	0.315339
lcl|NC_000909.1_cds_WP_064496515.1_514	0.25448	0.615574	0.296455
lcl|NC_000909.1_cds_WP_064496517.1_516	0.259159	0.691473	0.28854
lcl|NC_000909.1_cds_WP_064496518.1_517	0.232036	0.624206	0.307635
lcl|NC_000909.1_cds_WP_064496519.1_520	0.262198	0.687564	0.292264
lcl|NC_000909.1_cds_WP_064496520.1_524	0.241886	0.614268	0.32934
lcl|NC_000909.1_cds_WP_064496521.1_526	0.286948	0.57868	0.27909
lcl|NC_000909.1_cds_WP_064496522.1_528	0.291309	0.715902	0.301259
lcl|NC_000909.1_cds_WP_064496523.1_529	0.23129	0.637128	0.295662
lcl|NC_000909.1_cds_WP_064496524.1_532	0.237953	0.659816	0.29737
lcl|NC_000909.1_cds_WP_064496525.1_533	0.238547	0.649694	0.307923
lcl|NC_000909.1_cds_WP_064496526.1_535	0.205788	0.64849	0.306974
lcl|NC_000909.1_cds_WP_064496528.1_538	0.274791	0.570654	0.287023
lcl|NC_000909.1_cds_WP_064496529.1_539	0.246541	0.653167	0.267431
lcl|NC_000909.1_cds_WP_064496530.1_541	0.235713	0.624422	0.292789
lcl|NC_000909.1_cds_WP_064496531.1_542	0.276322	0.561767	0.297792
lcl|NC_000909.1_cds_WP_064496532.1_545	0.296512	0.622063	0.307925
lcl|NC_000909.1_cds_WP_064496533.1_548	0.274169	0.654104	0.299205
lcl|NC_000909.1_cds_WP_064496534.1_550	0.238075	0.692342	0.317764
lcl|NC_000909.1_cds_WP_064496537.1_555	0.200042	0.697329	0.306959
lcl|NC_000909.1_cds_WP_064496538.1_561	0.256544	0.688214	0.312743
lcl|NC_000909.1_cds_WP_064496540.1_569	0.251102	0.663211	0.290335
lcl|NC_000909.1_cds_WP_064496541.1_574	0.273729	0.563566	0.298911
lcl|NC_000909.1_cds_WP_064496542.1_577	0.234751	0.653219	0.292589
lcl|NC_000909.1_cds_WP_064496543.1_579	0.250719	0.669298	0.294916
lcl|NC_000909.1_cds_WP_064496544.1_580	0.271806	0.715553	0.303173
lcl|NC_000909.1_cds_WP_064496545.1_595	0.271655	0.661745	0.290852
lcl|NC_000909.1_cds_WP_064496546.1_596	0.253136	0.648122	0.281879
lcl|NC_000909.1_cds_WP_064496547.1_597	0.260259	0.669725	0.283389
lcl|NC_000909.1_cds_WP_064496548.1_599	0.259651	0.578689	0.319158
lcl|NC_000909.1_cds_WP_064496549.1_601	0.241343	0.51958	0.298236
lcl|NC_000909.1_cds_WP_064496550.1_603	0.282775	0.735599	0.302569
lcl|NC_000909.1_cds_WP_064496551.1_607	0.315698	0.753665	0.283095
lcl|NC_000909.1_cds_WP_064496552.1_611	0.268992	0.667674	0.301025
lcl|NC_000909.1_cds_WP_064496553.1_613	0.208909	0.563783	0.307429
lcl|NC_000909.1_cds_WP_064496554.1_615	0.25349	0.676353	0.295924
lcl|NC_000909.1_cds_WP_064496555.1_618	0.232507	0.680216	0.302537
lcl|NC_000909.1_cds_WP_064496556.1_622	0.256183	0.697455	0.300943
lcl|NC_000909.1_cds_WP_064496557.1_624	0.227958	0.696959	0.287542
lcl|NC_000909.1_cds_WP_064496558.1_632	0.299948	0.579063	0.292884
lcl|NC_000909.1_cds_WP_064496559.1_637	0.277584	0.698309	0.330313
lcl|NC_000909.1_cds_WP_064496560.1_645	0.286721	0.669604	0.296204
lcl|NC_000909.1_cds_WP_064496561.1_646	0.257043	0.713426	0.273402
lcl|NC_000909.1_cds_WP_064496562.1_649	0.255015	0.700571	0.285654
lcl|NC_000909.1_cds_WP_064496563.1_652	0.260604	0.724017	0.301504
lcl|NC_000909.1_cds_WP_064496564.1_656	0.253239	0.721085	0.31438
lcl|NC_000909.1_cds_WP_064496565.1_659	0.243369	0.66384	0.286795
lcl|NC_000909.1_cds_WP_064496566.1_662	0.252882	0.696919	0.310355
lcl|NC_000909.1_cds_WP_064496567.1_664	0.245321	0.665736	0.295758
lcl|NC_000909.1_cds_WP_064496568.1_666	0.240943	0.660958	0.300124
lcl|NC_000909.1_cds_WP_064496569.1_667	0.267714	0.646925	0.283658
lcl|NC_000909.1_cds_WP_064496570.1_672	0.278194	0.724274	0.298959
lcl|NC_000909.1_cds_WP_064496571.1_673	0.266419	0.638585	0.268995
lcl|NC_000909.1_cds_WP_064496572.1_675	0.23892	0.747231	0.307854
lcl|NC_000909.1_cds_WP_064496573.1_678	0.269215	0.743499	0.28402
lcl|NC_000909.1_cds_WP_064496574.1_688	0.278568	0.727907	0.291808
lcl|NC_000909.1_cds_WP_064496575.1_689	0.250666	0.641385	0.287328
lcl|NC_000909.1_cds_WP_064496577.1_694	0.257653	0.746053	0.295585
lcl|NC_000909.1_cds_WP_064496578.1_695	0.250953	0.666394	0.29748
lcl|NC_000909.1_cds_WP_064496579.1_712	0.267961	0.761958	0.285009
lcl|NC_000909.1_cds_WP_064496580.1_713	0.173649	0.659226	0.317006
lcl|NC_000909.1_cds_WP_064496581.1_714	0.252827	0.63131	0.285859
lcl|NC_000909.1_cds_WP_064496582.1_717	0.259827	0.720271	0.296486
lcl|NC_000909.1_cds_WP_064496583.1_722	0.22294	0.667623	0.285777
lcl|NC_000909.1_cds_WP_064496584.1_723	0.242374	0.618221	0.291531
lcl|NC_000909.1_cds_WP_064496585.1_728	0.292227	0.647833	0.266377
lcl|NC_000909.1_cds_WP_064496586.1_733	0.25741	0.632603	0.304125
lcl|NC_000909.1_cds_WP_064496588.1_738	0.243384	0.658573	0.284395
lcl|NC_000909.1_cds_WP_064496590.1_739	0.254547	0.651412	0.318609
lcl|NC_000909.1_cds_WP_064496592.1_744	0.22298	0.687469	0.291223
lcl|NC_000909.1_cds_WP_064496594.1_748	0.259267	0.67052	0.319215
lcl|NC_000909.1_cds_WP_064496597.1_749	0.222957	0.693781	0.30584
lcl|NC_000909.1_cds_WP_064496599.1_754	0.277155	0.696544	0.28522
lcl|NC_000909.1_cds_WP_064496601.1_757	0.29112	0.610654	0.301837
lcl|NC_000909.1_cds_WP_064496603.1_758	0.318077	0.718372	0.313385
lcl|NC_000909.1_cds_WP_064496605.1_759	0.239398	0.692735	0.308493
lcl|NC_000909.1_cds_WP_064496607.1_763	0.229336	0.690062	0.319467
lcl|NC_000909.1_cds_WP_064496615.1_780	0.23961	0.625896	0.284299
lcl|NC_000909.1_cds_WP_064496616.1_782	0.329525	0.706176	0.266256
lcl|NC_000909.1_cds_WP_064496617.1_784	0.236269	0.615519	0.29417
lcl|NC_000909.1_cds_WP_064496618.1_785	0.263154	0.598663	0.304383
lcl|NC_000909.1_cds_WP_064496619.1_786	0.267528	0.689542	0.299304
lcl|NC_000909.1_cds_WP_064496620.1_787	0.239626	0.698487	0.316171
lcl|NC_000909.1_cds_WP_064496622.1_802	0.208055	0.689533	0.295641
lcl|NC_000909.1_cds_WP_064496623.1_804	0.228231	0.625543	0.311492
lcl|NC_000909.1_cds_WP_064496624.1_808	0.285678	0.652286	0.292747
lcl|NC_000909.1_cds_WP_064496625.1_813	0.212173	0.656269	0.297554
lcl|NC_000909.1_cds_WP_064496626.1_815	0.233611	0.689382	0.294512
lcl|NC_000909.1_cds_WP_064496628.1_831	0.255556	0.699608	0.307769
lcl|NC_000909.1_cds_WP_064496629.1_832	0.265235	0.706134	0.310463
lcl|NC_000909.1_cds_WP_064496630.1_837	0.229396	0.696537	0.290172
lcl|NC_000909.1_cds_WP_064496631.1_838	0.242196	0.689257	0.301481
lcl|NC_000909.1_cds_WP_064496632.1_839	0.261025	0.694309	0.292256
lcl|NC_000909.1_cds_WP_064496633.1_842	0.304382	0.627252	0.289427
lcl|NC_000909.1_cds_WP_064496635.1_844	0.253184	0.654848	0.311513
lcl|NC_000909.1_cds_WP_064496638.1_871	0.260893	0.6669	0.277083
lcl|NC_000909.1_cds_WP_064496639.1_879	0.308315	0.705412	0.315358
lcl|NC_000909.1_cds_WP_064496640.1_888	0.283627	0.686586	0.315872
lcl|NC_000909.1_cds_WP_064496641.1_893	0.246524	0.64109	0.30746
lcl|NC_000909.1_cds_WP_064496642.1_896	0.261035	0.727663	0.289573
lcl|NC_000909.1_cds_WP_064496643.1_904	0.237823	0.658554	0.30282
lcl|NC_000909.1_cds_WP_064496644.1_906	0.255843	0.67918	0.303664
lcl|NC_000909.1_cds_WP_064496645.1_909	0.276664	0.64452	0.301042
lcl|NC_000909.1_cds_WP_064496647.1_924	0.262773	0.71514	0.294201
lcl|NC_000909.1_cds_WP_064496650.1_933	0.249878	0.64403	0.320121
lcl|NC_000909.1_cds_WP_064496651.1_935	0.252835	0.613874	0.265706
lcl|NC_000909.1_cds_WP_064496652.1_936	0.247442	0.704493	0.287651
lcl|NC_000909.1_cds_WP_064496653.1_937	0.25105	0.599419	0.310066
lcl|NC_000909.1_cds_WP_064496654.1_938	0.257728	0.605987	0.278021
lcl|NC_000909.1_cds_WP_064496655.1_939	0.272389	0.604934	0.286364
lcl|NC_000909.1_cds_WP_064496656.1_944	0.278536	0.676787	0.276646
lcl|NC_000909.1_cds_WP_064496657.1_945	0.237232	0.650671	0.303562
lcl|NC_000909.1_cds_WP_064496658.1_946	0.19728	0.721511	0.303426
lcl|NC_000909.1_cds_WP_064496659.1_949	0.238989	0.671208	0.291165
lcl|NC_000909.1_cds_WP_064496660.1_950	0.229936	0.685985	0.31447
lcl|NC_000909.1_cds_WP_064496661.1_951	0.244699	0.651094	0.278276
lcl|NC_000909.1_cds_WP_064496662.1_952	0.301073	0.680409	0.308755
lcl|NC_000909.1_cds_WP_064496663.1_953	0.254866	0.697882	0.297961
lcl|NC_000909.1_cds_WP_064496664.1_955	0.344456	0.814598	0.293591
lcl|NC_000909.1_cds_WP_064496665.1_958	0.248816	0.646822	0.285561
lcl|NC_000909.1_cds_WP_064496666.1_965	0.245185	0.588468	0.29684
lcl|NC_000909.1_cds_WP_064496667.1_968	0.270426	0.675705	0.274386
lcl|NC_000909.1_cds_WP_064496668.1_970	0.26616	0.690574	0.327429
lcl|NC_000909.1_cds_WP_064496669.1_972	0.270293	0.701434	0.296308
lcl|NC_000909.1_cds_WP_064496670.1_975	0.272624	0.650195	0.283569
lcl|NC_000909.1_cds_WP_064496671.1_979	0.261202	0.589338	0.308377
lcl|NC_000909.1_cds_WP_064496672.1_982	0.252117	0.638657	0.315137
lcl|NC_000909.1_cds_WP_064496673.1_984	0.2988	0.6946	0.288001
lcl|NC_000909.1_cds_WP_064496675.1_989	0.258259	0.655415	0.311858
lcl|NC_000909.1_cds_WP_064496676.1_991	0.229025	0.624106	0.299955
lcl|NC_000909.1_cds_WP_064496677.1_992	0.237953	0.638967	0.304516
lcl|NC_000909.1_cds_WP_064496678.1_993	0.289859	0.799677	0.325915
lcl|NC_000909.1_cds_WP_064496679.1_996	0.263874	0.70775	0.290035
lcl|NC_000909.1_cds_WP_064496681.1_1006	0.217752	0.679051	0.297154
lcl|NC_000909.1_cds_WP_064496682.1_1007	0.247307	0.682735	0.286722
lcl|NC_000909.1_cds_WP_064496683.1_1012	0.278197	0.688793	0.292729
lcl|NC_000909.1_cds_WP_064496684.1_1013	0.268688	0.56863	0.275502
lcl|NC_000909.1_cds_WP_064496687.1_1022	0.247732	0.687487	0.28949
lcl|NC_000909.1_cds_WP_064496689.1_1027	0.276074	0.726468	0.300825
lcl|NC_000909.1_cds_WP_064496690.1_1028	0.235362	0.749236	0.354851
lcl|NC_000909.1_cds_WP_064496691.1_1031	0.277648	0.700536	0.31898
lcl|NC_000909.1_cds_WP_064496693.1_1038	0.268455	0.569727	0.305501
lcl|NC_000909.1_cds_WP_064496694.1_1041	0.2014	0.648727	0.307413
lcl|NC_000909.1_cds_WP_064496695.1_1042	0.257225	0.669243	0.290499
lcl|NC_000909.1_cds_WP_064496696.1_1047	0.247451	0.659237	0.286182
lcl|NC_000909.1_cds_WP_064496697.1_1051	0.240328	0.640829	0.288554
lcl|NC_000909.1_cds_WP_064496698.1_1052	0.259034	0.614858	0.283652
lcl|NC_000909.1_cds_WP_064496699.1_1056	0.270561	0.621619	0.288511
lcl|NC_000909.1_cds_WP_064496700.1_1057	0.276404	0.669702	0.303231
lcl|NC_000909.1_cds_WP_064496701.1_1062	0.267208	0.67973	0.300031
lcl|NC_000909.1_cds_WP_064496703.1_1067	0.285878	0.683597	0.289304
lcl|NC_000909.1_cds_WP_064496704.1_1069	0.236959	0.678373	0.297093
lcl|NC_000909.1_cds_WP_064496705.1_1070	0.258345	0.681843	0.307546
lcl|NC_000909.1_cds_WP_064496706.1_1073	0.266296	0.591182	0.286347
lcl|NC_000909.1_cds_WP_064496707.1_1078	0.241506	0.522892	0.290679
lcl|NC_000909.1_cds_WP_064496708.1_1079	0.242341	0.692835	0.30037
lcl|NC_000909.1_cds_WP_064496709.1_1080	0.214726	0.684629	0.301421
lcl|NC_000909.1_cds_WP_064496710.1_1082	0.265393	0.681038	0.303797
lcl|NC_000909.1_cds_WP_064496711.1_1083	0.243401	0.669655	0.31092
lcl|NC_000909.1_cds_WP_064496712.1_1095	0.27515	0.77741	0.296832
lcl|NC_000909.1_cds_WP_064496715.1_1108	0.248652	0.703591	0.269269
lcl|NC_000909.1_cds_WP_064496718.1_1122	0.267473	0.693024	0.262221
lcl|NC_000909.1_cds_WP_064496720.1_1125	0.255823	0.662051	0.286683
lcl|NC_000909.1_cds_WP_064496721.1_1133	0.275813	0.6362	0.28958
lcl|NC_000909.1_cds_WP_064496722.1_1139	0.259303	0.641279	0.299909
lcl|NC_000909.1_cds_WP_064496723.1_1141	0.268636	0.680213	0.30674
lcl|NC_000909.1_cds_WP_064496724.1_1146	0.255002	0.696155	0.295942
lcl|NC_000909.1_cds_WP_064496725.1_1148	0.290776	0.683525	0.283295
lcl|NC_000909.1_cds_WP_064496727.1_1157	0.275011	0.545055	0.271215
lcl|NC_000909.1_cds_WP_064496728.1_1159	0.243141	0.634202	0.279939
lcl|NC_000909.1_cds_WP_064496729.1_1160	0.191211	0.622711	0.293721
lcl|NC_000909.1_cds_WP_064496731.1_1172	0.288822	0.625403	0.287711
lcl|NC_000909.1_cds_WP_064496732.1_1177	0.223381	0.649297	0.282889
lcl|NC_000909.1_cds_WP_064496733.1_1180	0.244649	0.642008	0.322381
lcl|NC_000909.1_cds_WP_064496734.1_1184	0.266925	0.677627	0.287764
lcl|NC_000909.1_cds_WP_064496735.1_1188	0.260275	0.658814	0.285471
lcl|NC_000909.1_cds_WP_064496736.1_1189	0.228976	0.635374	0.286409
lcl|NC_000909.1_cds_WP_064496737.1_1195	0.225539	0.671975	0.279765
lcl|NC_000909.1_cds_WP_064496738.1_1196	0.278019	0.791071	0.330048
lcl|NC_000909.1_cds_WP_064496739.1_1204	0.241058	0.740868	0.306977
lcl|NC_000909.1_cds_WP_064496741.1_1209	0.263905	0.569957	0.280303
lcl|NC_000909.1_cds_WP_064496742.1_1210	0.27763	0.716852	0.272747
lcl|NC_000909.1_cds_WP_064496743.1_1212	0.248546	0.649379	0.312813
lcl|NC_000909.1_cds_WP_064496744.1_1218	0.323942	0.637451	0.288494
lcl|NC_000909.1_cds_WP_064496745.1_1220	0.31414	0.712208	0.311416
lcl|NC_000909.1_cds_WP_064496746.1_1222	0.232914	0.67928	0.300246
lcl|NC_000909.1_cds_WP_064496747.1_1223	0.259025	0.692601	0.296948
lcl|NC_000909.1_cds_WP_064496748.1_1225	0.262009	0.635285	0.279527
lcl|NC_000909.1_cds_WP_064496749.1_1230	0.311354	0.601589	0.295366
lcl|NC_000909.1_cds_WP_064496750.1_1234	0.26921	0.703476	0.299676
lcl|NC_000909.1_cds_WP_064496751.1_1243	0.214677	0.605819	0.291539
lcl|NC_000909.1_cds_WP_064496752.1_1247	0.241325	0.676556	0.313671
lcl|NC_000909.1_cds_WP_064496753.1_1249	0.263423	0.712318	0.293572
lcl|NC_000909.1_cds_WP_064496754.1_1250	0.258717	0.654165	0.290526
lcl|NC_000909.1_cds_WP_064496755.1_1256	0.253194	0.640186	0.295397
lcl|NC_000909.1_cds_WP_064496756.1_1261	0.253473	0.636876	0.317226
lcl|NC_000909.1_cds_WP_064496757.1_1262	0.245761	0.63368	0.304545
lcl|NC_000909.1_cds_WP_064496758.1_1265	0.268898	0.68605	0.30111
lcl|NC_000909.1_cds_WP_064496759.1_1266	0.268769	0.696844	0.298826
lcl|NC_000909.1_cds_WP_064496760.1_1270	0.278059	0.595678	0.25711
lcl|NC_000909.1_cds_WP_064496761.1_1272	0.264654	0.644746	0.310025
lcl|NC_000909.1_cds_WP_064496762.1_1278	0.239752	0.640649	0.296996
lcl|NC_000909.1_cds_WP_064496763.1_1282	0.306739	0.799897	0.29218
lcl|NC_000909.1_cds_WP_064496764.1_1285	0.224936	0.681507	0.28987
lcl|NC_000909.1_cds_WP_064496765.1_1293	0.240506	0.608239	0.287252
lcl|NC_000909.1_cds_WP_064496766.1_1294	0.242824	0.683179	0.308507
lcl|NC_000909.1_cds_WP_064496767.1_1299	0.268489	0.667307	0.286161
lcl|NC_000909.1_cds_WP_064496768.1_1304	0.257688	0.717161	0.28558
lcl|NC_000909.1_cds_WP_064496769.1_1308	0.289702	0.674901	0.285839
lcl|NC_000909.1_cds_WP_064496770.1_1312	0.294066	0.690924	0.30329
lcl|NC_000909.1_cds_WP_064496771.1_1313	0.229653	0.638495	0.297268
lcl|NC_000909.1_cds_WP_064496772.1_1315	0.243013	0.692058	0.301505
lcl|NC_000909.1_cds_WP_064496773.1_1321	0.244105	0.657203	0.305396
lcl|NC_000909.1_cds_WP_064496774.1_1323	0.258743	0.643525	0.272655
lcl|NC_000909.1_cds_WP_064496775.1_1330	0.254766	0.687558	0.29876
lcl|NC_000909.1_cds_WP_064496776.1_1333	0.294187	0.624365	0.296063
lcl|NC_000909.1_cds_WP_064496777.1_1335	0.282924	0.6809	0.289841
lcl|NC_000909.1_cds_WP_064496778.1_1342	0.253662	0.586328	0.291449
lcl|NC_000909.1_cds_WP_064496779.1_1352	0.23022	0.68943	0.308177
lcl|NC_000909.1_cds_WP_064496780.1_1354	0.256947	0.694731	0.279918
lcl|NC_000909.1_cds_WP_064496781.1_1355	0.253098	0.628629	0.300485
lcl|NC_000909.1_cds_WP_064496782.1_1356	0.260204	0.612129	0.28927
lcl|NC_000909.1_cds_WP_064496783.1_1358	0.286371	0.659601	0.290942
lcl|NC_000909.1_cds_WP_064496784.1_1363	0.216182	0.575088	0.296089
lcl|NC_000909.1_cds_WP_064496785.1_1365	0.281559	0.60765	0.275946
lcl|NC_000909.1_cds_WP_064496786.1_1366	0.246653	0.648299	0.299247
lcl|NC_000909.1_cds_WP_064496787.1_1370	0.255399	0.68008	0.284349
lcl|NC_000909.1_cds_WP_064496788.1_1371	0.255626	0.7151	0.276057
lcl|NC_000909.1_cds_WP_064496789.1_1373	0.264003	0.625974	0.302272
lcl|NC_000909.1_cds_WP_064496792.1_1381	0.223699	0.634754	0.287954
lcl|NC_000909.1_cds_WP_064496793.1_1382	0.260536	0.64493	0.279447
lcl|NC_000909.1_cds_WP_064496794.1_1383	0.295203	0.664245	0.288071
lcl|NC_000909.1_cds_WP_064496795.1_1384	0.267171	0.648362	0.296154
lcl|NC_000909.1_cds_WP_064496796.1_1386	0.223208	0.618535	0.295524
lcl|NC_000909.1_cds_WP_064496798.1_1395	0.250223	0.652442	0.300017
lcl|NC_000909.1_cds_WP_064496800.1_1403	0.284533	0.675341	0.323594
lcl|NC_000909.1_cds_WP_064496801.1_1404	0.215839	0.678883	0.304657
lcl|NC_000909.1_cds_WP_064496803.1_1406	0.252332	0.632973	0.300928
lcl|NC_000909.1_cds_WP_064496804.1_1407	0.277263	0.689141	0.295871
lcl|NC_000909.1_cds_WP_064496805.1_1409	0.280101	0.702293	0.304821
lcl|NC_000909.1_cds_WP_064496806.1_1410	0.230174	0.669794	0.288709
lcl|NC_000909.1_cds_WP_064496809.1_1418	0.263459	0.635243	0.313421
lcl|NC_000909.1_cds_WP_064496810.1_1421	0.279887	0.74489	0.268428
lcl|NC_000909.1_cds_WP_064496811.1_1427	0.293239	0.745786	0.285315
lcl|NC_000909.1_cds_WP_064496812.1_1429	0.269606	0.688757	0.28224
lcl|NC_000909.1_cds_WP_064496813.1_1437	0.246423	0.692546	0.304807
lcl|NC_000909.1_cds_WP_064496814.1_1443	0.228207	0.648698	0.292532
lcl|NC_000909.1_cds_WP_064496817.1_1464	0.272677	0.73647	0.311472
lcl|NC_000909.1_cds_WP_064496818.1_1466	0.26993	0.752734	0.297404
lcl|NC_000909.1_cds_WP_064496819.1_1467	0.210888	0.381998	0.273766
lcl|NC_000909.1_cds_WP_064496820.1_1470	0.299268	0.707264	0.31328
lcl|NC_000909.1_cds_WP_064496821.1_1474	0.261574	0.616006	0.302125
lcl|NC_000909.1_cds_WP_064496822.1_1476	0.245953	0.700071	0.304167
lcl|NC_000909.1_cds_WP_064496823.1_1477	0.243659	0.69376	0.293965
lcl|NC_000909.1_cds_WP_064496824.1_1480	0.221785	0.566567	0.328584
lcl|NC_000909.1_cds_WP_064496825.1_1485	0.255102	0.663607	0.288499
lcl|NC_000909.1_cds_WP_064496826.1_1486	0.303971	0.631082	0.294551
lcl|NC_000909.1_cds_WP_064496827.1_1489	0.239441	0.587902	0.282297
lcl|NC_000909.1_cds_WP_064496828.1_1491	0.255795	0.655679	0.301957
lcl|NC_000909.1_cds_WP_064496830.1_1503	0.276905	0.661968	0.272107
lcl|NC_000909.1_cds_WP_064496831.1_1507	0.268435	0.725857	0.308523
lcl|NC_000909.1_cds_WP_064496833.1_1521	0.255253	0.73872	0.294626
lcl|NC_000909.1_cds_WP_064496835.1_1527	0.223712	0.687773	0.30552
lcl|NC_000909.1_cds_WP_064496836.1_1529	0.243933	0.690632	0.296332
lcl|NC_000909.1_cds_WP_064496838.1_1539	0.249197	0.671687	0.281097
lcl|NC_000909.1_cds_WP_064496839.1_1540	0.239606	0.692436	0.288748
lcl|NC_000909.1_cds_WP_064496840.1_1542	0.250706	0.69026	0.303523
lcl|NC_000909.1_cds_WP_064496841.1_1544	0.232406	0.684618	0.292626
lcl|NC_000909.1_cds_WP_064496842.1_1546	0.271196	0.732699	0.28981
lcl|NC_000909.1_cds_WP_064496843.1_1550	0.297471	0.643865	0.278862
lcl|NC_000909.1_cds_WP_064496844.1_1553	0.240997	0.716811	0.296485
lcl|NC_000909.1_cds_WP_064496845.1_1556	0.241974	0.676207	0.296557
lcl|NC_000909.1_cds_WP_064496846.1_1559	0.265945	0.587485	0.276936
lcl|NC_000909.1_cds_WP_064496847.1_1561	0.273097	0.740517	0.288249
lcl|NC_000909.1_cds_WP_064496848.1_1563	0.260139	0.697337	0.312378
lcl|NC_000909.1_cds_WP_064496851.1_1575	0.243166	0.682382	0.289848
lcl|NC_000909.1_cds_WP_064496852.1_1576	0.21724	0.674356	0.307317
lcl|NC_000909.1_cds_WP_064496853.1_1581	0.235555	0.648365	0.295898
lcl|NC_000909.1_cds_WP_064496854.1_1584	0.250847	0.543001	0.30106
lcl|NC_000909.1_cds_WP_064496855.1_1585	0.235449	0.469568	0.320165
lcl|NC_000909.1_cds_WP_064496856.1_1586	0.224168	0.362605	0.297446
lcl|NC_000909.1_cds_WP_064496857.1_1588	0.240329	0.654593	0.288473
lcl|NC_000909.1_cds_WP_064496860.1_1603	0.243184	0.670569	0.315718
lcl|NC_000909.1_cds_WP_064496861.1_1608	0.243253	0.701241	0.295865
lcl|NC_000909.1_cds_WP_064496862.1_1609	0.29573	0.728583	0.327798
lcl|NC_000909.1_cds_WP_064496863.1_1613	0.261953	0.747185	0.321623
lcl|NC_000909.1_cds_WP_064496864.1_1615	0.266441	0.703482	0.299161
lcl|NC_000909.1_cds_WP_064496865.1_1620	0.252072	0.53447	0.261088
lcl|NC_000909.1_cds_WP_064496866.1_1626	0.245975	0.714632	0.31431
lcl|NC_000909.1_cds_WP_064496869.1_1634	0.258049	0.681673	0.319573
lcl|NC_000909.1_cds_WP_064496870.1_1638	0.240205	0.701618	0.29068
lcl|NC_000909.1_cds_WP_064496872.1_1656	0.242049	0.648686	0.301083
lcl|NC_000909.1_cds_WP_064496873.1_1657	0.246769	0.68809	0.287629
lcl|NC_000909.1_cds_WP_064496874.1_1665	0.280285	0.596771	0.277907
lcl|NC_000909.1_cds_WP_064496875.1_1674	0.237069	0.681585	0.296863
lcl|NC_000909.1_cds_WP_064496876.1_1680	0.256514	0.620262	0.295339
lcl|NC_000909.1_cds_WP_064496877.1_1687	0.301129	0.654242	0.307056
lcl|NC_000909.1_cds_WP_064496878.1_1688	0.295547	0.666045	0.284124
lcl|NC_000909.1_cds_WP_064496879.1_1694	0.265454	0.676501	0.299449
lcl|NC_000909.1_cds_WP_064496881.1_1700	0.234573	0.673064	0.300672
lcl|NC_000909.1_cds_WP_064496882.1_1701	0.275689	0.618195	0.279835
lcl|NC_000909.1_cds_WP_064496884.1_1704	0.287296	0.67344	0.300134
lcl|NC_000909.1_cds_WP_064496886.1_1712	0.213419	0.604759	0.305976
lcl|NC_000909.1_cds_WP_064496888.1_1717	0.227141	0.648701	0.29583
lcl|NC_000909.1_cds_WP_064496889.1_1720	0.252413	0.708422	0.290722
lcl|NC_000909.1_cds_WP_064496890.1_1722	0.243647	0.688079	0.277529
lcl|NC_000909.1_cds_WP_064496891.1_1723	0.252747	0.677806	0.307324
lcl|NC_000909.1_cds_WP_064496894.1_1738	0.281169	0.721428	0.283051
lcl|NC_000909.1_cds_WP_064496895.1_49	0.235293	0.803407	0.31206
lcl|NC_000909.1_cds_WP_064496896.1_70	0.203551	0.634441	0.3079
lcl|NC_000909.1_cds_WP_064496898.1_123	0.27897	0.663373	0.308552
lcl|NC_000909.1_cds_WP_064496901.1_226	0.257348	0.600986	0.284795
lcl|NC_000909.1_cds_WP_064496902.1_236	0.25932	0.714689	0.299964
lcl|NC_000909.1_cds_WP_064496904.1_251	0.264463	0.703093	0.300125
lcl|NC_000909.1_cds_WP_064496905.1_280	0.247552	0.624492	0.290578
lcl|NC_000909.1_cds_WP_064496906.1_281	0.239514	0.68269	0.288025
lcl|NC_000909.1_cds_WP_064496907.1_284	0.252363	0.694221	0.308884
lcl|NC_000909.1_cds_WP_064496908.1_286	0.303357	0.675658	0.307542
lcl|NC_000909.1_cds_WP_064496909.1_292	0.254711	0.700473	0.273487
lcl|NC_000909.1_cds_WP_064496910.1_391	0.277902	0.631501	0.321115
lcl|NC_000909.1_cds_WP_064496911.1_397	0.25726	0.775366	0.28148
lcl|NC_000909.1_cds_WP_064496912.1_424	0.266955	0.680985	0.301676
lcl|NC_000909.1_cds_WP_064496916.1_498	0.247971	0.667516	0.284482
lcl|NC_000909.1_cds_WP_064496917.1_509	0.220211	0.63109	0.29538
lcl|NC_000909.1_cds_WP_064496920.1_570	0.23302	0.683217	0.280115
lcl|NC_000909.1_cds_WP_064496921.1_587	0.252749	0.696578	0.287614
lcl|NC_000909.1_cds_WP_064496922.1_616	0.272053	0.696146	0.316178
lcl|NC_000909.1_cds_WP_064496924.1_647	0.256698	0.68123	0.271744
lcl|NC_000909.1_cds_WP_064496925.1_668	0.223307	0.58089	0.29327
lcl|NC_000909.1_cds_WP_064496927.1_687	0.258919	0.637643	0.292367
lcl|NC_000909.1_cds_WP_064496931.1_836	0.244192	0.655171	0.285386
lcl|NC_000909.1_cds_WP_064496932.1_848	0.260696	0.637829	0.307108
lcl|NC_000909.1_cds_WP_064496933.1_877	0.269447	0.71865	0.282085
lcl|NC_000909.1_cds_WP_064496934.1_880	0.257457	0.523775	0.325118
lcl|NC_000909.1_cds_WP_064496935.1_897	0.268158	0.721658	0.306497
lcl|NC_000909.1_cds_WP_064496936.1_902	0.217946	0.644918	0.286436
lcl|NC_000909.1_cds_WP_064496937.1_930	0.26704	0.570579	0.287028
lcl|NC_000909.1_cds_WP_064496939.1_954	0.281314	0.68501	0.301036
lcl|NC_000909.1_cds_WP_064496941.1_974	0.276724	0.67906	0.276348
lcl|NC_000909.1_cds_WP_064496942.1_980	0.268356	0.693785	0.294839
lcl|NC_000909.1_cds_WP_064496944.1_1064	0.256614	0.642834	0.288005
lcl|NC_000909.1_cds_WP_064496945.1_1084	0.244335	0.654209	0.309047
lcl|NC_000909.1_cds_WP_064496946.1_1118	0.244678	0.674254	0.302633
lcl|NC_000909.1_cds_WP_064496949.1_1171	0.248191	0.701919	0.298812
lcl|NC_000909.1_cds_WP_064496950.1_1185	0.228223	0.569812	0.290985
lcl|NC_000909.1_cds_WP_064496951.1_1233	0.269922	0.682508	0.306893
lcl|NC_000909.1_cds_WP_064496952.1_1235	0.303718	0.672395	0.297631
lcl|NC_000909.1_cds_WP_064496953.1_1240	0.276237	0.677753	0.307979
lcl|NC_000909.1_cds_WP_064496955.1_1273	0.222689	0.636348	0.287409
lcl|NC_000909.1_cds_WP_064496956.1_1275	0.259279	0.614661	0.260513
lcl|NC_000909.1_cds_WP_064496957.1_1277	0.230699	0.626939	0.307385
lcl|NC_000909.1_cds_WP_064496958.1_1316	0.279379	0.682056	0.295795
lcl|NC_000909.1_cds_WP_064496959.1_1331	0.244897	0.748518	0.31151
lcl|NC_000909.1_cds_WP_064496960.1_1351	0.252524	0.625082	0.295434
lcl|NC_000909.1_cds_WP_064496963.1_1388	0.237527	0.686499	0.300647
lcl|NC_000909.1_cds_WP_064496964.1_1400	0.28984	0.62447	0.294396
lcl|NC_000909.1_cds_WP_064496965.1_1422	0.266027	0.716094	0.300469
lcl|NC_000909.1_cds_WP_064496966.1_1424	0.266371	0.707727	0.290078
lcl|NC_000909.1_cds_WP_064496967.1_1426	0.24409	0.586748	0.282219
lcl|NC_000909.1_cds_WP_064496969.1_1456	0.237089	0.500901	0.274489
lcl|NC_000909.1_cds_WP_064496971.1_1499	0.249918	0.649424	0.301843
lcl|NC_000909.1_cds_WP_064496972.1_1524	0.267869	0.668576	0.289367
lcl|NC_000909.1_cds_WP_064496973.1_1564	0.325818	0.71393	0.287862
lcl|NC_000909.1_cds_WP_064496975.1_1607	0.259655	0.677669	0.297846
lcl|NC_000909.1_cds_WP_064496977.1_1623	0.269648	0.732121	0.292934
lcl|NC_000909.1_cds_WP_064496979.1_1628	0.278145	0.681511	0.293256
lcl|NC_000909.1_cds_WP_064496980.1_1651	0.21287	0.608325	0.293404
lcl|NC_000909.1_cds_WP_064496983.1_1666	0.247163	0.725191	0.295616
lcl|NC_000909.1_cds_WP_064496984.1_1668	0.249487	0.667703	0.290398
lcl|NC_000909.1_cds_WP_064496986.1_1721	0.250508	0.693739	0.301798
lcl|NC_000909.1_cds_WP_064496987.1_1727	0.252179	0.687358	0.301587
lcl|NC_000909.1_cds_WP_064496988.1_1731	0.224942	0.661923	0.302784
lcl|NC_000909.1_cds_WP_064496989.1_1748	0.231591	0.68338	0.304821
lcl|NC_000909.1_cds_WP_081874506.1_246	0.152972	0.69053	0.358457
lcl|NC_000909.1_cds_WP_083774535.1_29	0.290461	0.694731	0.318668
lcl|NC_000909.1_cds_WP_083774537.1_155	0.250869	0.614132	0.308983
lcl|NC_000909.1_cds_WP_083774538.1_436	0.26808	0.614662	0.316228
lcl|NC_000909.1_cds_WP_083774539.1_525	0.27193	0.643606	0.298528
lcl|NC_000909.1_cds_WP_083774540.1_609	0.236546	0.623264	0.276628
lcl|NC_000909.1_cds_WP_083774541.1_685	0.239365	0.685096	0.274748
lcl|NC_000909.1_cds_WP_083774542.1_693	0.2499	0.709567	0.286597
lcl|NC_000909.1_cds_WP_083774543.1_770	0.289569	0.664962	0.299958
lcl|NC_000909.1_cds_WP_083774544.1_948	0.231201	0.879471	0.276931
lcl|NC_000909.1_cds_WP_083774545.1_967	0.264802	0.737612	0.304703
lcl|NC_000909.1_cds_WP_083774546.1_1116	0.225246	0.653443	0.296966
lcl|NC_000909.1_cds_WP_083774547.1_1237	0.265775	0.633868	0.297578
lcl|NC_000909.1_cds_WP_083774548.1_1244	0.257477	0.64331	0.30763
lcl|NC_000909.1_cds_WP_083774549.1_1269	0.265342	0.659915	0.302138
lcl|NC_000909.1_cds_WP_083774550.1_1298	0.234806	0.723335	0.304107
lcl|NC_000909.1_cds_WP_083774551.1_1411	0.271732	0.663848	0.295992
lcl|NC_000909.1_cds_WP_083774552.1_1483	0.260829	0.688433	0.294098
lcl|NC_000909.1_cds_WP_083774553.1_1614	0.23852	0.651217	0.2876
lcl|NC_000909.1_cds_WP_083774554.1_1640	0.245707	0.63017	0.281807
lcl|NC_000909.1_cds_WP_083774555.1_1661	0.258486	0.667602	0.303464
lcl|NC_000909.1_cds_WP_083774556.1_1695	0.240544	0.681125	0.302314
lcl|NC_000909.1_cds_WP_083774557.1_23	0.245008	0.750252	0.305289
lcl|NC_000909.1_cds_WP_083774558.1_238	0.242224	0.640851	0.299702
lcl|NC_000909.1_cds_WP_083774559.1_772	0.265187	0.677161	0.314837
lcl|NC_000909.1_cds_WP_083774560.1_1238	0.268732	0.670594	0.303075
lcl|NC_000909.1_cds_WP_083774561.1_1570	0.270425	0.685549	0.295106
