# Supplementary material for: gtAI: an improved species-specific tRNA adaptation index using the genetic algorithm
Source: Front Mol Biosci. 2023 Jul 4;10:1218518. doi: 10.3389/fmolb.2023.1218518 (PMC10352787; doi:10.3389/fmolb.2023.1218518)
Supplement: Supplementary file 2 [file Table3.XLSX]

## Sheet: Escherichia coli
gene id	gtAI	CAI	StAI
lcl|CP014225.1_cds_1137	0.289229	0.274806	0.25089
lcl|CP014225.1_cds_1173	0.245971	0.332643	0.236746
lcl|CP014225.1_cds_1286	0.274555	0.43103	0.242348
lcl|CP014225.1_cds_1338	0.210822	0.231341	0.19746
lcl|CP014225.1_cds_1339	0.258409	0.280634	0.222812
lcl|CP014225.1_cds_1420	0.288353	0.528988	0.261458
lcl|CP014225.1_cds_1501	0.282294	0.355835	0.251436
lcl|CP014225.1_cds_1705	0.243367	0.32407	0.216798
lcl|CP014225.1_cds_1766	0.281443	0.272401	0.233528
lcl|CP014225.1_cds_1772	0.284348	0.332083	0.247543
lcl|CP014225.1_cds_1792	0.276113	0.270884	0.24685
lcl|CP014225.1_cds_1893	0.27573	0.279878	0.247838
lcl|CP014225.1_cds_2	0.249465	0.277315	0.233257
lcl|CP014225.1_cds_2065	0.276617	0.460822	0.251962
lcl|CP014225.1_cds_2073	0.259623	0.345203	0.232431
lcl|CP014225.1_cds_226	0.27764	0.277151	0.243856
lcl|CP014225.1_cds_227	0.257998	0.26417	0.225435
lcl|CP014225.1_cds_2294	0.25904	0.450359	0.235197
lcl|CP014225.1_cds_2344	0.257917	0.223599	0.220387
lcl|CP014225.1_cds_2395	0.241203	0.467445	0.220201
lcl|CP014225.1_cds_2417	0.287836	0.29082	0.230072
lcl|CP014225.1_cds_255	0.305941	0.414192	0.259198
lcl|CP014225.1_cds_2565	0.246388	0.313671	0.228801
lcl|CP014225.1_cds_2577	0.266819	0.334536	0.241227
lcl|CP014225.1_cds_2612	0.255052	0.292594	0.231755
lcl|CP014225.1_cds_2645	0.272843	0.377298	0.242953
lcl|CP014225.1_cds_268	0.281867	0.319232	0.251532
lcl|CP014225.1_cds_2767	0.289018	0.303631	0.248342
lcl|CP014225.1_cds_283	0.283342	0.418984	0.279556
lcl|CP014225.1_cds_287	0.286099	0.440483	0.258342
lcl|CP014225.1_cds_2966	0.235627	0.345102	0.220007
lcl|CP014225.1_cds_2968	0.275462	0.366667	0.252775
lcl|CP014225.1_cds_3081	0.305747	0.531341	0.250496
lcl|CP014225.1_cds_3084	0.350187	0.814017	0.300188
lcl|CP014225.1_cds_319	0.297306	0.385943	0.257704
lcl|CP014225.1_cds_3249	0.326255	0.501415	0.282834
lcl|CP014225.1_cds_3250	0.29877	0.412607	0.271767
lcl|CP014225.1_cds_3254	0.278664	0.300767	0.244849
lcl|CP014225.1_cds_3273	0.22897	0.248627	0.209802
lcl|CP014225.1_cds_3280	0.293209	0.460484	0.252384
lcl|CP014225.1_cds_3347	0.257676	0.356561	0.232475
lcl|CP014225.1_cds_3403	0.276872	0.345491	0.243952
lcl|CP014225.1_cds_3404	0.279912	0.387099	0.251822
lcl|CP014225.1_cds_3465	0.227314	0.230414	0.197832
lcl|CP014225.1_cds_3524	0.235953	0.348214	0.210602
lcl|CP014225.1_cds_3533	0.28435	0.442066	0.253746
lcl|CP014225.1_cds_3736	0.295203	0.310971	0.266036
lcl|CP014225.1_cds_3737	0.231339	0.354151	0.20546
lcl|CP014225.1_cds_377	0.292038	0.403075	0.261748
lcl|CP014225.1_cds_379	0.280095	0.430299	0.244398
lcl|CP014225.1_cds_3878	0.274623	0.366734	0.225054
lcl|CP014225.1_cds_3893	0.290014	0.406245	0.249194
lcl|CP014225.1_cds_3966	0.24463	0.383835	0.234114
lcl|CP014225.1_cds_399	0.286743	0.27637	0.231448
lcl|CP014225.1_cds_4	0.260858	0.357503	0.240139
lcl|CP014225.1_cds_404	0.251109	0.371253	0.227119
lcl|CP014225.1_cds_4053	0.311651	0.484978	0.276823
lcl|CP014225.1_cds_4078	0.276298	0.300328	0.225836
lcl|CP014225.1_cds_4101	0.3073	0.488094	0.27304
lcl|CP014225.1_cds_4108	0.290925	0.590202	0.248425
lcl|CP014225.1_cds_4110	0.302087	0.624836	0.253457
lcl|CP014225.1_cds_4112	0.261272	0.593807	0.248798
lcl|CP014225.1_cds_4143	0.30998	0.531736	0.263288
lcl|CP014225.1_cds_4175	0.273595	0.364893	0.240159
lcl|CP014225.1_cds_4215	0.259249	0.250554	0.232998
lcl|CP014225.1_cds_4251	0.280383	0.402961	0.243163
lcl|CP014225.1_cds_427	0.236483	0.260169	0.216286
lcl|CP014225.1_cds_4326	0.271175	0.380922	0.253285
lcl|CP014225.1_cds_4472	0.247312	0.3255	0.227223
lcl|CP014225.1_cds_4486	0.27057	0.381065	0.242842
lcl|CP014225.1_cds_4487	0.286749	0.410658	0.247979
lcl|CP014225.1_cds_4489	0.295543	0.434276	0.255947
lcl|CP014225.1_cds_5	0.241843	0.318864	0.219756
lcl|CP014225.1_cds_508	0.245419	0.215226	0.234413
lcl|CP014225.1_cds_6	0.267162	0.31104	0.231353
lcl|CP014225.1_cds_635	0.296824	0.557397	0.261903
lcl|CP014225.1_cds_7	0.255251	0.401573	0.231036
lcl|CP014225.1_cds_71	0.292117	0.467516	0.25483
lcl|CP014225.1_cds_74	0.307429	0.475172	0.26597
lcl|CP014225.1_cds_863	0.279749	0.381032	0.24624
lcl|CP014225.1_cds_938	0.223943	0.286682	0.200742
lcl|CP014225.1_cds_971	0.23156	0.361599	0.212549
lcl|CP014225.1_cds_AMC94701.1_3	0.332342	0.467913	0.287313
lcl|CP014225.1_cds_AMC94702.1_8	0.302203	0.434849	0.253442
lcl|CP014225.1_cds_AMC94703.1_9	0.286423	0.458032	0.264745
lcl|CP014225.1_cds_AMC94704.1_10	0.264725	0.416913	0.240257
lcl|CP014225.1_cds_AMC94705.1_11	0.320602	0.622281	0.285901
lcl|CP014225.1_cds_AMC94706.1_12	0.27398	0.292118	0.241253
lcl|CP014225.1_cds_AMC94707.1_13	0.305332	0.511753	0.266702
lcl|CP014225.1_cds_AMC94708.1_14	0.299632	0.566796	0.266098
lcl|CP014225.1_cds_AMC94709.1_15	0.280242	0.46232	0.245655
lcl|CP014225.1_cds_AMC94710.1_16	0.318785	0.551972	0.279155
lcl|CP014225.1_cds_AMC94711.1_17	0.299061	0.467016	0.25687
lcl|CP014225.1_cds_AMC94712.1_18	0.346441	0.552537	0.313454
lcl|CP014225.1_cds_AMC94713.1_19	0.305936	0.522611	0.266812
lcl|CP014225.1_cds_AMC94714.1_20	0.32999	0.526289	0.282584
lcl|CP014225.1_cds_AMC94715.1_21	0.316486	0.615002	0.285067
lcl|CP014225.1_cds_AMC94716.1_22	0.319487	0.536469	0.275535
lcl|CP014225.1_cds_AMC94717.1_23	0.254405	0.248781	0.224361
lcl|CP014225.1_cds_AMC94718.1_24	0.271041	0.406348	0.245617
lcl|CP014225.1_cds_AMC94719.1_25	0.302714	0.487371	0.267926
lcl|CP014225.1_cds_AMC94720.1_26	0.371247	0.725839	0.341356
lcl|CP014225.1_cds_AMC94721.1_27	0.278651	0.435472	0.251074
lcl|CP014225.1_cds_AMC94722.1_28	0.292566	0.509432	0.25518
lcl|CP014225.1_cds_AMC94723.1_29	0.280499	0.487823	0.244669
lcl|CP014225.1_cds_AMC94724.1_30	0.299456	0.555485	0.266863
lcl|CP014225.1_cds_AMC94725.1_31	0.301989	0.591685	0.269559
lcl|CP014225.1_cds_AMC94726.1_32	0.322735	0.609358	0.282455
lcl|CP014225.1_cds_AMC94727.1_33	0.259559	0.409362	0.233122
lcl|CP014225.1_cds_AMC94728.1_34	0.31927	0.573899	0.279785
lcl|CP014225.1_cds_AMC94729.1_35	0.288243	0.457095	0.260368
lcl|CP014225.1_cds_AMC94730.1_36	0.278508	0.502633	0.253286
lcl|CP014225.1_cds_AMC94731.1_37	0.282854	0.464796	0.253147
lcl|CP014225.1_cds_AMC94732.1_38	0.270089	0.430762	0.236993
lcl|CP014225.1_cds_AMC94733.1_39	0.271355	0.401476	0.239911
lcl|CP014225.1_cds_AMC94734.1_40	0.302177	0.569723	0.27356
lcl|CP014225.1_cds_AMC94735.1_41	0.263875	0.410914	0.236341
lcl|CP014225.1_cds_AMC94736.1_42	0.264857	0.457534	0.243621
lcl|CP014225.1_cds_AMC94737.1_43	0.275949	0.44911	0.246237
lcl|CP014225.1_cds_AMC94738.1_44	0.323567	0.620155	0.28651
lcl|CP014225.1_cds_AMC94739.1_45	0.267584	0.363061	0.243748
lcl|CP014225.1_cds_AMC94740.1_46	0.293992	0.545477	0.262872
lcl|CP014225.1_cds_AMC94741.1_47	0.317039	0.612889	0.282807
lcl|CP014225.1_cds_AMC94742.1_48	0.220611	0.258077	0.19751
lcl|CP014225.1_cds_AMC94743.1_49	0.308732	0.576005	0.272737
lcl|CP014225.1_cds_AMC94744.1_50	0.230561	0.323262	0.201776
lcl|CP014225.1_cds_AMC94745.1_51	0.321652	0.604529	0.279578
lcl|CP014225.1_cds_AMC94746.1_52	0.310902	0.535641	0.266784
lcl|CP014225.1_cds_AMC94747.1_53	0.277788	0.507078	0.250472
lcl|CP014225.1_cds_AMC94748.1_54	0.272589	0.358303	0.238356
lcl|CP014225.1_cds_AMC94749.1_55	0.301906	0.413142	0.263651
lcl|CP014225.1_cds_AMC94750.1_56	0.303067	0.441045	0.267163
lcl|CP014225.1_cds_AMC94751.1_57	0.302835	0.445441	0.263513
lcl|CP014225.1_cds_AMC94752.1_58	0.312318	0.544963	0.277535
lcl|CP014225.1_cds_AMC94753.1_59	0.32374	0.535386	0.28255
lcl|CP014225.1_cds_AMC94754.1_60	0.279974	0.401082	0.248115
lcl|CP014225.1_cds_AMC94755.1_61	0.320393	0.582961	0.284636
lcl|CP014225.1_cds_AMC94756.1_62	0.332353	0.504553	0.293414
lcl|CP014225.1_cds_AMC94757.1_63	0.300361	0.530613	0.273262
lcl|CP014225.1_cds_AMC94758.1_64	0.364509	0.839108	0.325871
lcl|CP014225.1_cds_AMC94759.1_65	0.303954	0.600627	0.273535
lcl|CP014225.1_cds_AMC94760.1_66	0.282476	0.419699	0.250721
lcl|CP014225.1_cds_AMC94761.1_67	0.328448	0.715805	0.288316
lcl|CP014225.1_cds_AMC94762.1_68	0.311794	0.547779	0.273185
lcl|CP014225.1_cds_AMC94763.1_69	0.316939	0.559521	0.279813
lcl|CP014225.1_cds_AMC94764.1_72	0.286631	0.438673	0.253253
lcl|CP014225.1_cds_AMC94765.1_73	0.27129	0.488312	0.250362
lcl|CP014225.1_cds_AMC94766.1_75	0.282429	0.475826	0.26371
lcl|CP014225.1_cds_AMC94767.1_76	0.283077	0.432996	0.260496
lcl|CP014225.1_cds_AMC94768.1_77	0.283865	0.467607	0.247778
lcl|CP014225.1_cds_AMC94769.1_78	0.265598	0.341173	0.241048
lcl|CP014225.1_cds_AMC94770.1_79	0.260619	0.377993	0.239828
lcl|CP014225.1_cds_AMC94771.1_80	0.309191	0.557784	0.271296
lcl|CP014225.1_cds_AMC94772.1_81	0.278853	0.503086	0.238331
lcl|CP014225.1_cds_AMC94773.1_82	0.288465	0.46136	0.256909
lcl|CP014225.1_cds_AMC94774.1_83	0.277857	0.454085	0.234741
lcl|CP014225.1_cds_AMC94775.1_84	0.308437	0.467224	0.255482
lcl|CP014225.1_cds_AMC94776.1_85	0.326226	0.593734	0.277418
lcl|CP014225.1_cds_AMC94777.1_86	0.279025	0.455097	0.262676
lcl|CP014225.1_cds_AMC94778.1_87	0.29689	0.478796	0.251573
lcl|CP014225.1_cds_AMC94779.1_89	0.294105	0.536836	0.257746
lcl|CP014225.1_cds_AMC94780.1_91	0.307417	0.645833	0.269008
lcl|CP014225.1_cds_AMC94781.1_92	0.271694	0.451749	0.249521
lcl|CP014225.1_cds_AMC94782.1_93	0.297403	0.518502	0.264983
lcl|CP014225.1_cds_AMC94783.1_94	0.317293	0.55746	0.279677
lcl|CP014225.1_cds_AMC94784.1_95	0.308736	0.488337	0.265797
lcl|CP014225.1_cds_AMC94785.1_96	0.30373	0.537891	0.272988
lcl|CP014225.1_cds_AMC94786.1_97	0.288499	0.508551	0.259194
lcl|CP014225.1_cds_AMC94787.1_98	0.325297	0.682132	0.278962
lcl|CP014225.1_cds_AMC94788.1_99	0.313287	0.421742	0.284093
lcl|CP014225.1_cds_AMC94789.1_100	0.300209	0.543051	0.281433
lcl|CP014225.1_cds_AMC94790.1_101	0.29276	0.521879	0.256691
lcl|CP014225.1_cds_AMC94791.1_102	0.285045	0.472568	0.254244
lcl|CP014225.1_cds_AMC94792.1_103	0.327403	0.666323	0.286406
lcl|CP014225.1_cds_AMC94793.1_104	0.2836	0.455769	0.253845
lcl|CP014225.1_cds_AMC94794.1_105	0.315389	0.593647	0.273436
lcl|CP014225.1_cds_AMC94795.1_106	0.242178	0.333105	0.227543
lcl|CP014225.1_cds_AMC94796.1_107	0.332491	0.60694	0.293618
lcl|CP014225.1_cds_AMC94797.1_108	0.334184	0.694049	0.293045
lcl|CP014225.1_cds_AMC94798.1_109	0.3381	0.660073	0.298903
lcl|CP014225.1_cds_AMC94799.1_110	0.300488	0.430823	0.264346
lcl|CP014225.1_cds_AMC94800.1_111	0.254234	0.291724	0.239269
lcl|CP014225.1_cds_AMC94801.1_112	0.301606	0.503578	0.262896
lcl|CP014225.1_cds_AMC94802.1_113	0.281318	0.455701	0.255437
lcl|CP014225.1_cds_AMC94803.1_114	0.346394	0.741279	0.283452
lcl|CP014225.1_cds_AMC94804.1_115	0.267389	0.486398	0.256007
lcl|CP014225.1_cds_AMC94805.1_116	0.267076	0.423942	0.2477
lcl|CP014225.1_cds_AMC94806.1_117	0.310136	0.471439	0.278382
lcl|CP014225.1_cds_AMC94807.1_118	0.281814	0.527046	0.243718
lcl|CP014225.1_cds_AMC94808.1_119	0.26356	0.302925	0.226002
lcl|CP014225.1_cds_AMC94809.1_120	0.317824	0.53323	0.274928
lcl|CP014225.1_cds_AMC94810.1_121	0.280532	0.433027	0.2528
lcl|CP014225.1_cds_AMC94811.1_122	0.323226	0.61667	0.281744
lcl|CP014225.1_cds_AMC94812.1_123	0.327572	0.585656	0.285144
lcl|CP014225.1_cds_AMC94813.1_124	0.3179	0.558684	0.289269
lcl|CP014225.1_cds_AMC94814.1_125	0.28234	0.46001	0.259012
lcl|CP014225.1_cds_AMC94815.1_126	0.283834	0.424053	0.254811
lcl|CP014225.1_cds_AMC94816.1_127	0.306302	0.545517	0.267444
lcl|CP014225.1_cds_AMC94817.1_129	0.28525	0.452354	0.267351
lcl|CP014225.1_cds_AMC94818.1_131	0.268874	0.424097	0.24051
lcl|CP014225.1_cds_AMC94819.1_132	0.303216	0.525935	0.293536
lcl|CP014225.1_cds_AMC94820.1_134	0.278013	0.421227	0.249874
lcl|CP014225.1_cds_AMC94821.1_135	0.26655	0.461645	0.245557
lcl|CP014225.1_cds_AMC94822.1_136	0.306106	0.458105	0.273752
lcl|CP014225.1_cds_AMC94823.1_137	0.266696	0.40975	0.243356
lcl|CP014225.1_cds_AMC94824.1_138	0.300992	0.535089	0.268093
lcl|CP014225.1_cds_AMC94825.1_139	0.302074	0.518357	0.267407
lcl|CP014225.1_cds_AMC94826.1_140	0.310565	0.531031	0.281688
lcl|CP014225.1_cds_AMC94827.1_141	0.303411	0.369632	0.259595
lcl|CP014225.1_cds_AMC94828.1_142	0.288283	0.495928	0.245153
lcl|CP014225.1_cds_AMC94829.1_143	0.317595	0.575472	0.289242
lcl|CP014225.1_cds_AMC94830.1_144	0.303025	0.525759	0.269342
lcl|CP014225.1_cds_AMC94831.1_145	0.335213	0.745542	0.29164
lcl|CP014225.1_cds_AMC94832.1_146	0.302463	0.566753	0.266137
lcl|CP014225.1_cds_AMC94833.1_147	0.334886	0.634828	0.294267
lcl|CP014225.1_cds_AMC94834.1_148	0.307675	0.35847	0.290874
lcl|CP014225.1_cds_AMC94835.1_149	0.300901	0.47318	0.268213
lcl|CP014225.1_cds_AMC94836.1_150	0.343343	0.637142	0.305139
lcl|CP014225.1_cds_AMC94837.1_151	0.308482	0.495005	0.266588
lcl|CP014225.1_cds_AMC94838.1_152	0.313492	0.552654	0.270072
lcl|CP014225.1_cds_AMC94839.1_154	0.292585	0.435001	0.259945
lcl|CP014225.1_cds_AMC94840.1_155	0.299497	0.482024	0.252055
lcl|CP014225.1_cds_AMC94841.1_156	0.32517	0.556712	0.273528
lcl|CP014225.1_cds_AMC94842.1_157	0.307336	0.534915	0.281436
lcl|CP014225.1_cds_AMC94843.1_158	0.269062	0.396843	0.23421
lcl|CP014225.1_cds_AMC94844.1_159	0.314434	0.583335	0.273584
lcl|CP014225.1_cds_AMC94845.1_160	0.364206	0.779177	0.325175
lcl|CP014225.1_cds_AMC94846.1_162	0.355262	0.758147	0.311961
lcl|CP014225.1_cds_AMC94847.1_163	0.283237	0.498861	0.251361
lcl|CP014225.1_cds_AMC94848.1_164	0.26293	0.432434	0.243651
lcl|CP014225.1_cds_AMC94849.1_165	0.310941	0.552903	0.279705
lcl|CP014225.1_cds_AMC94850.1_166	0.322255	0.606127	0.288664
lcl|CP014225.1_cds_AMC94851.1_167	0.303234	0.551609	0.263509
lcl|CP014225.1_cds_AMC94852.1_168	0.311397	0.583508	0.270795
lcl|CP014225.1_cds_AMC94853.1_169	0.284273	0.473961	0.262813
lcl|CP014225.1_cds_AMC94854.1_170	0.285284	0.43556	0.257827
lcl|CP014225.1_cds_AMC94855.1_171	0.271165	0.47614	0.236645
lcl|CP014225.1_cds_AMC94856.1_172	0.346506	0.695031	0.308125
lcl|CP014225.1_cds_AMC94857.1_173	0.281988	0.378617	0.254132
lcl|CP014225.1_cds_AMC94858.1_174	0.251163	0.300205	0.22388
lcl|CP014225.1_cds_AMC94859.1_175	0.296856	0.476606	0.261302
lcl|CP014225.1_cds_AMC94860.1_176	0.299135	0.503639	0.263543
lcl|CP014225.1_cds_AMC94861.1_177	0.29845	0.498063	0.270505
lcl|CP014225.1_cds_AMC94862.1_178	0.33008	0.508594	0.292035
lcl|CP014225.1_cds_AMC94863.1_179	0.301867	0.498407	0.269986
lcl|CP014225.1_cds_AMC94864.1_180	0.285758	0.486268	0.256548
lcl|CP014225.1_cds_AMC94865.1_181	0.295377	0.52139	0.262717
lcl|CP014225.1_cds_AMC94866.1_182	0.305889	0.540274	0.273976
lcl|CP014225.1_cds_AMC94867.1_183	0.309463	0.524242	0.270906
lcl|CP014225.1_cds_AMC94868.1_184	0.305117	0.500753	0.272843
lcl|CP014225.1_cds_AMC94869.1_185	0.297433	0.460533	0.26338
lcl|CP014225.1_cds_AMC94870.1_186	0.300666	0.514137	0.267083
lcl|CP014225.1_cds_AMC94871.1_187	0.280644	0.458251	0.261117
lcl|CP014225.1_cds_AMC94872.1_188	0.295498	0.440366	0.263797
lcl|CP014225.1_cds_AMC94873.1_189	0.286631	0.438673	0.253253
lcl|CP014225.1_cds_AMC94874.1_190	0.254059	0.413004	0.229643
lcl|CP014225.1_cds_AMC94875.1_191	0.294595	0.48217	0.261605
lcl|CP014225.1_cds_AMC94876.1_192	0.279998	0.417481	0.254545
lcl|CP014225.1_cds_AMC94877.1_193	0.305537	0.558829	0.269578
lcl|CP014225.1_cds_AMC94878.1_194	0.310451	0.545197	0.274676
lcl|CP014225.1_cds_AMC94879.1_195	0.341514	0.681794	0.303999
lcl|CP014225.1_cds_AMC94880.1_196	0.319848	0.539351	0.297792
lcl|CP014225.1_cds_AMC94881.1_197	0.302316	0.55346	0.269724
lcl|CP014225.1_cds_AMC94882.1_198	0.25146	0.370988	0.231773
lcl|CP014225.1_cds_AMC94883.1_199	0.247006	0.420781	0.231947
lcl|CP014225.1_cds_AMC94884.1_200	0.324849	0.60704	0.290639
lcl|CP014225.1_cds_AMC94885.1_201	0.304922	0.541641	0.276762
lcl|CP014225.1_cds_AMC94886.1_202	0.281448	0.45744	0.242963
lcl|CP014225.1_cds_AMC94887.1_203	0.284395	0.514756	0.252517
lcl|CP014225.1_cds_AMC94888.1_204	0.27747	0.50122	0.247369
lcl|CP014225.1_cds_AMC94889.1_205	0.303534	0.544572	0.269386
lcl|CP014225.1_cds_AMC94890.1_206	0.294911	0.47039	0.268519
lcl|CP014225.1_cds_AMC94891.1_207	0.297024	0.322213	0.268412
lcl|CP014225.1_cds_AMC94892.1_208	0.353924	0.548227	0.32459
lcl|CP014225.1_cds_AMC94893.1_209	0.302368	0.449417	0.268386
lcl|CP014225.1_cds_AMC94894.1_210	0.310333	0.529367	0.271972
lcl|CP014225.1_cds_AMC94895.1_211	0.302687	0.518637	0.258807
lcl|CP014225.1_cds_AMC94896.1_212	0.301412	0.517415	0.268985
lcl|CP014225.1_cds_AMC94897.1_213	0.349958	0.648854	0.300682
lcl|CP014225.1_cds_AMC94898.1_214	0.27514	0.443982	0.245561
lcl|CP014225.1_cds_AMC94899.1_215	0.301659	0.467817	0.264766
lcl|CP014225.1_cds_AMC94900.1_216	0.329645	0.607171	0.277579
lcl|CP014225.1_cds_AMC94901.1_217	0.292556	0.558945	0.264267
lcl|CP014225.1_cds_AMC94902.1_218	0.3024	0.455943	0.271584
lcl|CP014225.1_cds_AMC94903.1_219	0.303312	0.525537	0.266098
lcl|CP014225.1_cds_AMC94904.1_220	0.311744	0.565368	0.269536
lcl|CP014225.1_cds_AMC94905.1_221	0.306527	0.576847	0.266504
lcl|CP014225.1_cds_AMC94906.1_222	0.318842	0.605238	0.284877
lcl|CP014225.1_cds_AMC94907.1_223	0.308595	0.542878	0.258034
lcl|CP014225.1_cds_AMC94908.1_224	0.281663	0.472464	0.257981
lcl|CP014225.1_cds_AMC94909.1_225	0.256497	0.381504	0.229151
lcl|CP014225.1_cds_AMC94910.1_228	0.27547	0.364696	0.249548
lcl|CP014225.1_cds_AMC94911.1_229	0.295977	0.513308	0.2597
lcl|CP014225.1_cds_AMC94912.1_230	0.304856	0.546974	0.268015
lcl|CP014225.1_cds_AMC94913.1_231	0.339108	0.626891	0.295373
lcl|CP014225.1_cds_AMC94914.1_232	0.287266	0.487121	0.254886
lcl|CP014225.1_cds_AMC94915.1_233	0.302913	0.550021	0.262634
lcl|CP014225.1_cds_AMC94916.1_234	0.341352	0.547761	0.301276
lcl|CP014225.1_cds_AMC94917.1_235	0.265483	0.45674	0.24271
lcl|CP014225.1_cds_AMC94918.1_236	0.285638	0.510634	0.255927
lcl|CP014225.1_cds_AMC94919.1_237	0.311808	0.57896	0.273499
lcl|CP014225.1_cds_AMC94920.1_238	0.32798	0.594179	0.280697
lcl|CP014225.1_cds_AMC94921.1_239	0.286991	0.467242	0.256737
lcl|CP014225.1_cds_AMC94922.1_240	0.289998	0.457132	0.255295
lcl|CP014225.1_cds_AMC94923.1_241	0.315502	0.453104	0.276868
lcl|CP014225.1_cds_AMC94924.1_242	0.284603	0.442829	0.254714
lcl|CP014225.1_cds_AMC94925.1_243	0.291243	0.377343	0.253654
lcl|CP014225.1_cds_AMC94926.1_244	0.326306	0.545143	0.286567
lcl|CP014225.1_cds_AMC94927.1_245	0.296006	0.700657	0.268539
lcl|CP014225.1_cds_AMC94928.1_246	0.280809	0.45073	0.254543
lcl|CP014225.1_cds_AMC94929.1_247	0.286914	0.487417	0.256246
lcl|CP014225.1_cds_AMC94930.1_248	0.278041	0.498108	0.257002
lcl|CP014225.1_cds_AMC94931.1_249	0.298992	0.487797	0.266852
lcl|CP014225.1_cds_AMC94932.1_250	0.288373	0.470841	0.253704
lcl|CP014225.1_cds_AMC94933.1_251	0.277673	0.486436	0.247805
lcl|CP014225.1_cds_AMC94934.1_252	0.30227	0.569353	0.268423
lcl|CP014225.1_cds_AMC94935.1_253	0.278678	0.5286	0.252673
lcl|CP014225.1_cds_AMC94936.1_256	0.251556	0.354798	0.21624
lcl|CP014225.1_cds_AMC94937.1_257	0.300328	0.559556	0.268464
lcl|CP014225.1_cds_AMC94938.1_258	0.263264	0.298292	0.231287
lcl|CP014225.1_cds_AMC94939.1_260	0.264524	0.350169	0.241232
lcl|CP014225.1_cds_AMC94940.1_261	0.298342	0.502875	0.256512
lcl|CP014225.1_cds_AMC94941.1_262	0.262984	0.369357	0.230977
lcl|CP014225.1_cds_AMC94942.1_263	0.286067	0.421697	0.25612
lcl|CP014225.1_cds_AMC94943.1_264	0.281899	0.369922	0.261428
lcl|CP014225.1_cds_AMC94944.1_265	0.255719	0.262693	0.242918
lcl|CP014225.1_cds_AMC94945.1_267	0.287307	0.460264	0.25348
lcl|CP014225.1_cds_AMC94946.1_269	0.279161	0.417585	0.252386
lcl|CP014225.1_cds_AMC94947.1_270	0.277628	0.45565	0.248448
lcl|CP014225.1_cds_AMC94948.1_271	0.314635	0.485514	0.276767
lcl|CP014225.1_cds_AMC94949.1_272	0.268358	0.364152	0.233918
lcl|CP014225.1_cds_AMC94950.1_273	0.274493	0.377442	0.242879
lcl|CP014225.1_cds_AMC94951.1_274	0.266895	0.380715	0.242201
lcl|CP014225.1_cds_AMC94952.1_275	0.280735	0.423062	0.245682
lcl|CP014225.1_cds_AMC94953.1_276	0.290562	0.401935	0.258572
lcl|CP014225.1_cds_AMC94954.1_277	0.295033	0.460724	0.265892
lcl|CP014225.1_cds_AMC94955.1_278	0.28498	0.432662	0.246665
lcl|CP014225.1_cds_AMC94956.1_279	0.301689	0.487021	0.270791
lcl|CP014225.1_cds_AMC94957.1_280	0.263909	0.321486	0.245651
lcl|CP014225.1_cds_AMC94958.1_281	0.264166	0.380124	0.244308
lcl|CP014225.1_cds_AMC94959.1_282	0.272712	0.366777	0.24435
lcl|CP014225.1_cds_AMC94960.1_284	0.307878	0.49389	0.249227
lcl|CP014225.1_cds_AMC94961.1_285	0.286703	0.463456	0.261583
lcl|CP014225.1_cds_AMC94962.1_286	0.304896	0.520401	0.265007
lcl|CP014225.1_cds_AMC94963.1_289	0.308897	0.627327	0.273347
lcl|CP014225.1_cds_AMC94964.1_290	0.276945	0.453911	0.250186
lcl|CP014225.1_cds_AMC94965.1_291	0.286071	0.462513	0.257718
lcl|CP014225.1_cds_AMC94966.1_292	0.315403	0.600623	0.264062
lcl|CP014225.1_cds_AMC94967.1_295	0.388045	0.733764	0.345585
lcl|CP014225.1_cds_AMC94968.1_296	0.289571	0.474768	0.252068
lcl|CP014225.1_cds_AMC94969.1_297	0.302473	0.510323	0.256753
lcl|CP014225.1_cds_AMC94970.1_298	0.296957	0.494478	0.259348
lcl|CP014225.1_cds_AMC94971.1_300	0.299787	0.591845	0.263959
lcl|CP014225.1_cds_AMC94972.1_301	0.281457	0.421713	0.245083
lcl|CP014225.1_cds_AMC94973.1_302	0.329081	0.717986	0.294055
lcl|CP014225.1_cds_AMC94974.1_303	0.279073	0.464819	0.254674
lcl|CP014225.1_cds_AMC94975.1_304	0.278007	0.425724	0.251438
lcl|CP014225.1_cds_AMC94976.1_305	0.28874	0.431083	0.247036
lcl|CP014225.1_cds_AMC94977.1_306	0.300338	0.435194	0.271928
lcl|CP014225.1_cds_AMC94978.1_307	0.347359	0.661315	0.30999
lcl|CP014225.1_cds_AMC94979.1_308	0.300118	0.62163	0.265143
lcl|CP014225.1_cds_AMC94980.1_309	0.306051	0.595501	0.269505
lcl|CP014225.1_cds_AMC94981.1_310	0.324697	0.643675	0.286614
lcl|CP014225.1_cds_AMC94982.1_311	0.317478	0.651668	0.284079
lcl|CP014225.1_cds_AMC94983.1_312	0.325438	0.661033	0.28241
lcl|CP014225.1_cds_AMC94984.1_313	0.328856	0.640238	0.290198
lcl|CP014225.1_cds_AMC94985.1_314	0.317546	0.599977	0.287239
lcl|CP014225.1_cds_AMC94986.1_315	0.310709	0.4661	0.26065
lcl|CP014225.1_cds_AMC94987.1_316	0.317545	0.517006	0.274623
lcl|CP014225.1_cds_AMC94988.1_317	0.341979	0.710078	0.296312
lcl|CP014225.1_cds_AMC94989.1_318	0.302444	0.484752	0.271948
lcl|CP014225.1_cds_AMC94990.1_320	0.294935	0.382855	0.262109
lcl|CP014225.1_cds_AMC94991.1_321	0.276252	0.338746	0.232797
lcl|CP014225.1_cds_AMC94992.1_322	0.270954	0.317042	0.241787
lcl|CP014225.1_cds_AMC94993.1_323	0.269028	0.302239	0.233713
lcl|CP014225.1_cds_AMC94994.1_324	0.29773	0.370327	0.255052
lcl|CP014225.1_cds_AMC94995.1_325	0.262801	0.273555	0.23091
lcl|CP014225.1_cds_AMC94996.1_326	0.265392	0.341508	0.229129
lcl|CP014225.1_cds_AMC94997.1_327	0.309417	0.451959	0.262238
lcl|CP014225.1_cds_AMC94998.1_328	0.28481	0.428869	0.25469
lcl|CP014225.1_cds_AMC94999.1_329	0.291975	0.488564	0.249193
lcl|CP014225.1_cds_AMC95000.1_330	0.321772	0.563025	0.287777
lcl|CP014225.1_cds_AMC95001.1_331	0.297527	0.47026	0.264869
lcl|CP014225.1_cds_AMC95002.1_332	0.303222	0.525652	0.270658
lcl|CP014225.1_cds_AMC95003.1_333	0.305911	0.586911	0.276087
lcl|CP014225.1_cds_AMC95004.1_334	0.306372	0.570639	0.270288
lcl|CP014225.1_cds_AMC95005.1_335	0.309677	0.597798	0.276075
lcl|CP014225.1_cds_AMC95006.1_336	0.326753	0.635782	0.285838
lcl|CP014225.1_cds_AMC95007.1_337	0.308181	0.649263	0.26768
lcl|CP014225.1_cds_AMC95008.1_338	0.32163	0.592846	0.285869
lcl|CP014225.1_cds_AMC95009.1_339	0.289145	0.485458	0.255542
lcl|CP014225.1_cds_AMC95010.1_340	0.303661	0.607632	0.271734
lcl|CP014225.1_cds_AMC95011.1_341	0.330461	0.727523	0.295195
lcl|CP014225.1_cds_AMC95012.1_342	0.271257	0.414547	0.239098
lcl|CP014225.1_cds_AMC95013.1_343	0.315935	0.513094	0.28349
lcl|CP014225.1_cds_AMC95014.1_344	0.296491	0.443138	0.255771
lcl|CP014225.1_cds_AMC95015.1_345	0.303006	0.592018	0.266639
lcl|CP014225.1_cds_AMC95016.1_346	0.308949	0.635175	0.271543
lcl|CP014225.1_cds_AMC95017.1_347	0.319418	0.62773	0.28018
lcl|CP014225.1_cds_AMC95018.1_348	0.327925	0.640878	0.285672
lcl|CP014225.1_cds_AMC95019.1_349	0.302341	0.55968	0.278227
lcl|CP014225.1_cds_AMC95020.1_350	0.3252	0.572468	0.2808
lcl|CP014225.1_cds_AMC95021.1_351	0.306596	0.526113	0.264816
lcl|CP014225.1_cds_AMC95022.1_352	0.298464	0.453709	0.253757
lcl|CP014225.1_cds_AMC95023.1_353	0.304017	0.628571	0.269949
lcl|CP014225.1_cds_AMC95024.1_354	0.309962	0.559318	0.281286
lcl|CP014225.1_cds_AMC95025.1_355	0.289939	0.472575	0.259022
lcl|CP014225.1_cds_AMC95026.1_356	0.282608	0.458042	0.250033
lcl|CP014225.1_cds_AMC95027.1_357	0.294886	0.530008	0.244575
lcl|CP014225.1_cds_AMC95028.1_358	0.318468	0.638944	0.279619
lcl|CP014225.1_cds_AMC95029.1_359	0.284105	0.455031	0.25571
lcl|CP014225.1_cds_AMC95030.1_360	0.30766	0.439273	0.272603
lcl|CP014225.1_cds_AMC95031.1_362	0.289982	0.487573	0.251477
lcl|CP014225.1_cds_AMC95032.1_363	0.308956	0.580544	0.274417
lcl|CP014225.1_cds_AMC95033.1_364	0.304648	0.592984	0.265554
lcl|CP014225.1_cds_AMC95034.1_365	0.309523	0.549756	0.268835
lcl|CP014225.1_cds_AMC95035.1_366	0.299005	0.490608	0.268373
lcl|CP014225.1_cds_AMC95036.1_367	0.301974	0.516464	0.26822
lcl|CP014225.1_cds_AMC95037.1_368	0.311563	0.583646	0.272123
lcl|CP014225.1_cds_AMC95038.1_369	0.299731	0.548834	0.267365
lcl|CP014225.1_cds_AMC95039.1_370	0.32974	0.668031	0.288954
lcl|CP014225.1_cds_AMC95040.1_371	0.232691	0.239065	0.219317
lcl|CP014225.1_cds_AMC95041.1_372	0.306707	0.368281	0.270661
lcl|CP014225.1_cds_AMC95042.1_373	0.29446	0.434045	0.257159
lcl|CP014225.1_cds_AMC95043.1_374	0.315606	0.487161	0.26078
lcl|CP014225.1_cds_AMC95044.1_375	0.313427	0.508796	0.292929
lcl|CP014225.1_cds_AMC95045.1_376	0.27978	0.463265	0.252082
lcl|CP014225.1_cds_AMC95046.1_378	0.279185	0.456133	0.248049
lcl|CP014225.1_cds_AMC95047.1_380	0.297677	0.471412	0.260155
lcl|CP014225.1_cds_AMC95048.1_381	0.261355	0.385252	0.23305
lcl|CP014225.1_cds_AMC95049.1_382	0.292723	0.505032	0.260281
lcl|CP014225.1_cds_AMC95050.1_383	0.288147	0.50756	0.256796
lcl|CP014225.1_cds_AMC95051.1_384	0.307972	0.567967	0.274855
lcl|CP014225.1_cds_AMC95052.1_385	0.308074	0.574543	0.274386
lcl|CP014225.1_cds_AMC95053.1_386	0.291585	0.564019	0.265671
lcl|CP014225.1_cds_AMC95054.1_387	0.285691	0.498219	0.25382
lcl|CP014225.1_cds_AMC95055.1_388	0.284534	0.497111	0.248446
lcl|CP014225.1_cds_AMC95056.1_389	0.290459	0.450444	0.248288
lcl|CP014225.1_cds_AMC95057.1_390	0.280559	0.499454	0.246753
lcl|CP014225.1_cds_AMC95058.1_391	0.264221	0.443135	0.244338
lcl|CP014225.1_cds_AMC95059.1_392	0.328644	0.612017	0.289903
lcl|CP014225.1_cds_AMC95060.1_393	0.272386	0.463848	0.254442
lcl|CP014225.1_cds_AMC95061.1_394	0.294287	0.517378	0.255521
lcl|CP014225.1_cds_AMC95062.1_395	0.268064	0.338321	0.238633
lcl|CP014225.1_cds_AMC95063.1_396	0.283339	0.418782	0.239413
lcl|CP014225.1_cds_AMC95064.1_397	0.316703	0.407851	0.265419
lcl|CP014225.1_cds_AMC95065.1_398	0.305415	0.540998	0.259287
lcl|CP014225.1_cds_AMC95066.1_400	0.264727	0.362724	0.229431
lcl|CP014225.1_cds_AMC95067.1_401	0.306806	0.581761	0.271639
lcl|CP014225.1_cds_AMC95068.1_402	0.337532	0.726683	0.293208
lcl|CP014225.1_cds_AMC95069.1_403	0.2771	0.407047	0.250945
lcl|CP014225.1_cds_AMC95070.1_405	0.28086	0.434855	0.254511
lcl|CP014225.1_cds_AMC95071.1_406	0.267015	0.292411	0.238384
lcl|CP014225.1_cds_AMC95072.1_407	0.298683	0.509863	0.269429
lcl|CP014225.1_cds_AMC95073.1_408	0.267283	0.437377	0.246207
lcl|CP014225.1_cds_AMC95074.1_409	0.284582	0.472462	0.255416
lcl|CP014225.1_cds_AMC95075.1_410	0.267929	0.464896	0.24668
lcl|CP014225.1_cds_AMC95076.1_411	0.341953	0.650286	0.298325
lcl|CP014225.1_cds_AMC95077.1_412	0.340498	0.612571	0.292906
lcl|CP014225.1_cds_AMC95078.1_413	0.295816	0.506353	0.264314
lcl|CP014225.1_cds_AMC95079.1_414	0.291607	0.444187	0.258991
lcl|CP014225.1_cds_AMC95080.1_415	0.284887	0.444811	0.252735
lcl|CP014225.1_cds_AMC95081.1_416	0.330444	0.4478	0.283187
lcl|CP014225.1_cds_AMC95082.1_417	0.277234	0.489871	0.243528
lcl|CP014225.1_cds_AMC95083.1_418	0.304873	0.50317	0.269886
lcl|CP014225.1_cds_AMC95084.1_419	0.286176	0.511873	0.252306
lcl|CP014225.1_cds_AMC95085.1_420	0.299713	0.507751	0.259324
lcl|CP014225.1_cds_AMC95086.1_421	0.326155	0.64127	0.28313
lcl|CP014225.1_cds_AMC95087.1_422	0.314032	0.58991	0.276904
lcl|CP014225.1_cds_AMC95088.1_423	0.311458	0.575503	0.274309
lcl|CP014225.1_cds_AMC95089.1_424	0.285935	0.538524	0.256656
lcl|CP014225.1_cds_AMC95090.1_425	0.290473	0.509439	0.242642
lcl|CP014225.1_cds_AMC95091.1_426	0.290335	0.496389	0.251782
lcl|CP014225.1_cds_AMC95092.1_428	0.321511	0.309131	0.262478
lcl|CP014225.1_cds_AMC95093.1_430	0.309818	0.524375	0.268738
lcl|CP014225.1_cds_AMC95094.1_431	0.290555	0.504774	0.260726
lcl|CP014225.1_cds_AMC95095.1_432	0.287016	0.546689	0.25767
lcl|CP014225.1_cds_AMC95096.1_433	0.299149	0.468376	0.256441
lcl|CP014225.1_cds_AMC95097.1_434	0.302146	0.486022	0.262215
lcl|CP014225.1_cds_AMC95098.1_435	0.284468	0.485634	0.252255
lcl|CP014225.1_cds_AMC95099.1_436	0.307577	0.559556	0.270027
lcl|CP014225.1_cds_AMC95100.1_437	0.307856	0.572003	0.268628
lcl|CP014225.1_cds_AMC95101.1_438	0.318051	0.484919	0.271959
lcl|CP014225.1_cds_AMC95102.1_439	0.350936	0.718534	0.302726
lcl|CP014225.1_cds_AMC95103.1_440	0.305522	0.54263	0.268937
lcl|CP014225.1_cds_AMC95104.1_442	0.279181	0.44324	0.245052
lcl|CP014225.1_cds_AMC95105.1_443	0.309452	0.589403	0.278639
lcl|CP014225.1_cds_AMC95106.1_444	0.275216	0.425508	0.243033
lcl|CP014225.1_cds_AMC95107.1_445	0.282115	0.550096	0.24948
lcl|CP014225.1_cds_AMC95108.1_446	0.3159	0.625722	0.277446
lcl|CP014225.1_cds_AMC95109.1_447	0.322879	0.692891	0.280178
lcl|CP014225.1_cds_AMC95110.1_448	0.281624	0.492455	0.251778
lcl|CP014225.1_cds_AMC95111.1_449	0.300734	0.619172	0.265547
lcl|CP014225.1_cds_AMC95112.1_450	0.294819	0.583428	0.27149
lcl|CP014225.1_cds_AMC95113.1_451	0.289034	0.515746	0.260102
lcl|CP014225.1_cds_AMC95114.1_452	0.287247	0.484472	0.251181
lcl|CP014225.1_cds_AMC95115.1_453	0.311291	0.546249	0.275739
lcl|CP014225.1_cds_AMC95116.1_454	0.272994	0.394468	0.241023
lcl|CP014225.1_cds_AMC95117.1_455	0.304719	0.549773	0.270571
lcl|CP014225.1_cds_AMC95118.1_456	0.303806	0.585703	0.268999
lcl|CP014225.1_cds_AMC95119.1_457	0.295687	0.451779	0.2565
lcl|CP014225.1_cds_AMC95120.1_458	0.333816	0.671397	0.291101
lcl|CP014225.1_cds_AMC95121.1_459	0.310742	0.608685	0.280631
lcl|CP014225.1_cds_AMC95122.1_460	0.318791	0.593338	0.282297
lcl|CP014225.1_cds_AMC95123.1_461	0.294461	0.52192	0.264269
lcl|CP014225.1_cds_AMC95124.1_462	0.271339	0.48953	0.248094
lcl|CP014225.1_cds_AMC95125.1_463	0.355816	0.673141	0.309577
lcl|CP014225.1_cds_AMC95126.1_464	0.288544	0.51308	0.256341
lcl|CP014225.1_cds_AMC95127.1_465	0.280261	0.456793	0.24877
lcl|CP014225.1_cds_AMC95128.1_466	0.290379	0.391214	0.254707
lcl|CP014225.1_cds_AMC95129.1_467	0.310687	0.514823	0.272154
lcl|CP014225.1_cds_AMC95130.1_468	0.296538	0.479047	0.264307
lcl|CP014225.1_cds_AMC95131.1_469	0.308894	0.519486	0.266969
lcl|CP014225.1_cds_AMC95132.1_470	0.307624	0.585227	0.26767
lcl|CP014225.1_cds_AMC95133.1_471	0.279335	0.447505	0.247381
lcl|CP014225.1_cds_AMC95134.1_472	0.278285	0.410156	0.245155
lcl|CP014225.1_cds_AMC95135.1_473	0.268515	0.469136	0.226781
lcl|CP014225.1_cds_AMC95136.1_474	0.288023	0.533597	0.258936
lcl|CP014225.1_cds_AMC95137.1_475	0.301677	0.577214	0.266993
lcl|CP014225.1_cds_AMC95138.1_476	0.300488	0.551001	0.269233
lcl|CP014225.1_cds_AMC95139.1_477	0.361428	0.812905	0.321606
lcl|CP014225.1_cds_AMC95140.1_478	0.309696	0.565062	0.27334
lcl|CP014225.1_cds_AMC95141.1_479	0.305506	0.560168	0.287687
lcl|CP014225.1_cds_AMC95142.1_480	0.299855	0.524483	0.262289
lcl|CP014225.1_cds_AMC95143.1_481	0.308206	0.468516	0.261029
lcl|CP014225.1_cds_AMC95144.1_482	0.302444	0.484752	0.271948
lcl|CP014225.1_cds_AMC95145.1_483	0.268713	0.413424	0.248033
lcl|CP014225.1_cds_AMC95146.1_484	0.320344	0.519895	0.281513
lcl|CP014225.1_cds_AMC95147.1_485	0.316974	0.55402	0.276488
lcl|CP014225.1_cds_AMC95148.1_486	0.31158	0.563193	0.271262
lcl|CP014225.1_cds_AMC95149.1_487	0.304341	0.581767	0.266891
lcl|CP014225.1_cds_AMC95150.1_488	0.329317	0.614288	0.279292
lcl|CP014225.1_cds_AMC95151.1_489	0.297413	0.592118	0.266657
lcl|CP014225.1_cds_AMC95152.1_490	0.311763	0.560149	0.27459
lcl|CP014225.1_cds_AMC95153.1_491	0.274454	0.432195	0.252582
lcl|CP014225.1_cds_AMC95154.1_493	0.313897	0.588215	0.274338
lcl|CP014225.1_cds_AMC95155.1_494	0.293884	0.60905	0.258993
lcl|CP014225.1_cds_AMC95156.1_495	0.268638	0.517696	0.242005
lcl|CP014225.1_cds_AMC95157.1_496	0.289022	0.555369	0.257139
lcl|CP014225.1_cds_AMC95158.1_497	0.331943	0.735767	0.292146
lcl|CP014225.1_cds_AMC95159.1_498	0.283918	0.61433	0.252628
lcl|CP014225.1_cds_AMC95160.1_499	0.256765	0.515582	0.235185
lcl|CP014225.1_cds_AMC95161.1_500	0.265295	0.354685	0.22973
lcl|CP014225.1_cds_AMC95162.1_501	0.325134	0.566852	0.282749
lcl|CP014225.1_cds_AMC95163.1_502	0.312934	0.586006	0.271839
lcl|CP014225.1_cds_AMC95164.1_503	0.302096	0.527221	0.268999
lcl|CP014225.1_cds_AMC95165.1_504	0.28253	0.491377	0.248775
lcl|CP014225.1_cds_AMC95166.1_505	0.285896	0.472145	0.263368
lcl|CP014225.1_cds_AMC95167.1_506	0.314018	0.612885	0.277734
lcl|CP014225.1_cds_AMC95168.1_507	0.378833	0.844668	0.332111
lcl|CP014225.1_cds_AMC95169.1_509	0.336897	0.332182	0.289403
lcl|CP014225.1_cds_AMC95170.1_510	0.304817	0.486058	0.268913
lcl|CP014225.1_cds_AMC95171.1_511	0.323552	0.584445	0.284667
lcl|CP014225.1_cds_AMC95172.1_512	0.295791	0.478223	0.256362
lcl|CP014225.1_cds_AMC95173.1_513	0.306325	0.454472	0.269931
lcl|CP014225.1_cds_AMC95174.1_514	0.297813	0.457469	0.265007
lcl|CP014225.1_cds_AMC95175.1_515	0.299107	0.469713	0.271167
lcl|CP014225.1_cds_AMC95176.1_516	0.298055	0.491628	0.264917
lcl|CP014225.1_cds_AMC95177.1_517	0.297193	0.497071	0.267519
lcl|CP014225.1_cds_AMC95178.1_518	0.302705	0.492214	0.269024
lcl|CP014225.1_cds_AMC95179.1_519	0.289924	0.479633	0.250071
lcl|CP014225.1_cds_AMC95180.1_520	0.26979	0.43195	0.241041
lcl|CP014225.1_cds_AMC95181.1_521	0.297167	0.506155	0.263783
lcl|CP014225.1_cds_AMC95182.1_522	0.293163	0.508941	0.258559
lcl|CP014225.1_cds_AMC95183.1_523	0.288519	0.440037	0.255539
lcl|CP014225.1_cds_AMC95184.1_524	0.293193	0.490852	0.256692
lcl|CP014225.1_cds_AMC95185.1_525	0.346511	0.726147	0.308204
lcl|CP014225.1_cds_AMC95186.1_526	0.318895	0.588757	0.278255
lcl|CP014225.1_cds_AMC95187.1_527	0.294284	0.495772	0.248612
lcl|CP014225.1_cds_AMC95188.1_528	0.228571	0.283669	0.214987
lcl|CP014225.1_cds_AMC95189.1_529	0.332626	0.726637	0.290973
lcl|CP014225.1_cds_AMC95190.1_531	0.286554	0.579438	0.261911
lcl|CP014225.1_cds_AMC95191.1_532	0.318321	0.559924	0.282982
lcl|CP014225.1_cds_AMC95192.1_533	0.270451	0.335677	0.241746
lcl|CP014225.1_cds_AMC95193.1_534	0.327936	0.550829	0.277397
lcl|CP014225.1_cds_AMC95194.1_535	0.312337	0.602325	0.272749
lcl|CP014225.1_cds_AMC95195.1_536	0.310711	0.61011	0.280161
lcl|CP014225.1_cds_AMC95196.1_537	0.280613	0.472102	0.253566
lcl|CP014225.1_cds_AMC95197.1_538	0.306042	0.600522	0.271512
lcl|CP014225.1_cds_AMC95198.1_539	0.287678	0.435576	0.260417
lcl|CP014225.1_cds_AMC95199.1_540	0.310741	0.502568	0.269778
lcl|CP014225.1_cds_AMC95200.1_541	0.291221	0.481862	0.256323
lcl|CP014225.1_cds_AMC95201.1_542	0.2889	0.477169	0.254581
lcl|CP014225.1_cds_AMC95202.1_543	0.305072	0.587723	0.26886
lcl|CP014225.1_cds_AMC95203.1_544	0.265477	0.405104	0.240098
lcl|CP014225.1_cds_AMC95204.1_545	0.290258	0.515515	0.264086
lcl|CP014225.1_cds_AMC95205.1_546	0.316916	0.568764	0.26669
lcl|CP014225.1_cds_AMC95206.1_547	0.312187	0.456963	0.265369
lcl|CP014225.1_cds_AMC95207.1_548	0.287924	0.486817	0.251032
lcl|CP014225.1_cds_AMC95208.1_549	0.285852	0.45823	0.25211
lcl|CP014225.1_cds_AMC95209.1_550	0.297144	0.511461	0.265197
lcl|CP014225.1_cds_AMC95210.1_551	0.298024	0.554364	0.260594
lcl|CP014225.1_cds_AMC95211.1_552	0.290139	0.515701	0.253874
lcl|CP014225.1_cds_AMC95212.1_553	0.280688	0.458441	0.249005
lcl|CP014225.1_cds_AMC95213.1_554	0.275723	0.468643	0.249397
lcl|CP014225.1_cds_AMC95214.1_555	0.271357	0.380785	0.252586
lcl|CP014225.1_cds_AMC95215.1_556	0.284984	0.435468	0.258979
lcl|CP014225.1_cds_AMC95216.1_557	0.281094	0.477425	0.245835
lcl|CP014225.1_cds_AMC95217.1_558	0.301121	0.537485	0.266943
lcl|CP014225.1_cds_AMC95218.1_559	0.355879	0.780312	0.31611
lcl|CP014225.1_cds_AMC95219.1_560	0.269516	0.482038	0.245979
lcl|CP014225.1_cds_AMC95220.1_561	0.278965	0.53885	0.250819
lcl|CP014225.1_cds_AMC95221.1_562	0.279602	0.453157	0.252762
lcl|CP014225.1_cds_AMC95222.1_563	0.312	0.524995	0.27357
lcl|CP014225.1_cds_AMC95223.1_564	0.279665	0.474167	0.243687
lcl|CP014225.1_cds_AMC95224.1_566	0.27934	0.328041	0.245623
lcl|CP014225.1_cds_AMC95225.1_567	0.299561	0.429846	0.261183
lcl|CP014225.1_cds_AMC95226.1_568	0.281438	0.393267	0.244461
lcl|CP014225.1_cds_AMC95227.1_569	0.282535	0.36718	0.245498
lcl|CP014225.1_cds_AMC95228.1_570	0.275926	0.319792	0.241721
lcl|CP014225.1_cds_AMC95229.1_571	0.263609	0.414298	0.234269
lcl|CP014225.1_cds_AMC95230.1_572	0.272872	0.376011	0.244477
lcl|CP014225.1_cds_AMC95231.1_573	0.31226	0.641041	0.275795
lcl|CP014225.1_cds_AMC95232.1_574	0.316945	0.635921	0.278758
lcl|CP014225.1_cds_AMC95233.1_575	0.327833	0.681364	0.292944
lcl|CP014225.1_cds_AMC95234.1_576	0.301463	0.528744	0.285275
lcl|CP014225.1_cds_AMC95235.1_577	0.325921	0.634211	0.281367
lcl|CP014225.1_cds_AMC95236.1_578	0.324895	0.661202	0.292719
lcl|CP014225.1_cds_AMC95237.1_579	0.314561	0.673954	0.277947
lcl|CP014225.1_cds_AMC95238.1_580	0.320072	0.714545	0.285551
lcl|CP014225.1_cds_AMC95239.1_581	0.328417	0.669712	0.293933
lcl|CP014225.1_cds_AMC95240.1_582	0.29523	0.646726	0.266611
lcl|CP014225.1_cds_AMC95241.1_583	0.319226	0.697079	0.28662
lcl|CP014225.1_cds_AMC95242.1_584	0.335187	0.636343	0.291904
lcl|CP014225.1_cds_AMC95243.1_585	0.315999	0.606633	0.284597
lcl|CP014225.1_cds_AMC95244.1_586	0.292063	0.451413	0.26011
lcl|CP014225.1_cds_AMC95245.1_587	0.31513	0.606299	0.278865
lcl|CP014225.1_cds_AMC95246.1_588	0.304829	0.533066	0.276118
lcl|CP014225.1_cds_AMC95247.1_589	0.301888	0.492207	0.267551
lcl|CP014225.1_cds_AMC95248.1_590	0.275004	0.494906	0.247107
lcl|CP014225.1_cds_AMC95249.1_591	0.323553	0.535875	0.282344
lcl|CP014225.1_cds_AMC95250.1_592	0.2816	0.422209	0.246473
lcl|CP014225.1_cds_AMC95251.1_594	0.345774	0.776053	0.313174
lcl|CP014225.1_cds_AMC95252.1_595	0.343775	0.795217	0.306096
lcl|CP014225.1_cds_AMC95253.1_596	0.302723	0.530899	0.265555
lcl|CP014225.1_cds_AMC95254.1_597	0.311184	0.533496	0.279499
lcl|CP014225.1_cds_AMC95255.1_598	0.292855	0.510662	0.260025
lcl|CP014225.1_cds_AMC95256.1_599	0.281163	0.476785	0.246794
lcl|CP014225.1_cds_AMC95257.1_600	0.281628	0.427497	0.244103
lcl|CP014225.1_cds_AMC95258.1_601	0.326351	0.57155	0.28243
lcl|CP014225.1_cds_AMC95259.1_602	0.291335	0.483789	0.25508
lcl|CP014225.1_cds_AMC95260.1_603	0.284281	0.387853	0.255349
lcl|CP014225.1_cds_AMC95261.1_604	0.308293	0.507529	0.277695
lcl|CP014225.1_cds_AMC95262.1_605	0.292686	0.533695	0.261572
lcl|CP014225.1_cds_AMC95263.1_606	0.308632	0.523225	0.262919
lcl|CP014225.1_cds_AMC95264.1_607	0.331324	0.60503	0.289547
lcl|CP014225.1_cds_AMC95265.1_608	0.308885	0.569548	0.267615
lcl|CP014225.1_cds_AMC95266.1_609	0.282952	0.50509	0.252586
lcl|CP014225.1_cds_AMC95267.1_610	0.33155	0.667421	0.287567
lcl|CP014225.1_cds_AMC95268.1_611	0.272075	0.500996	0.242495
lcl|CP014225.1_cds_AMC95269.1_612	0.30518	0.53943	0.253318
lcl|CP014225.1_cds_AMC95270.1_613	0.297043	0.571754	0.264176
lcl|CP014225.1_cds_AMC95271.1_614	0.324924	0.63824	0.293148
lcl|CP014225.1_cds_AMC95272.1_615	0.303497	0.530465	0.267318
lcl|CP014225.1_cds_AMC95273.1_616	0.292373	0.513101	0.263402
lcl|CP014225.1_cds_AMC95274.1_617	0.322278	0.649091	0.286536
lcl|CP014225.1_cds_AMC95275.1_618	0.300475	0.523373	0.265077
lcl|CP014225.1_cds_AMC95276.1_619	0.278127	0.402207	0.248658
lcl|CP014225.1_cds_AMC95277.1_620	0.283356	0.478786	0.257063
lcl|CP014225.1_cds_AMC95278.1_621	0.344236	0.780113	0.310309
lcl|CP014225.1_cds_AMC95279.1_622	0.276068	0.460486	0.242399
lcl|CP014225.1_cds_AMC95280.1_623	0.296231	0.598276	0.262717
lcl|CP014225.1_cds_AMC95281.1_624	0.278499	0.548596	0.242088
lcl|CP014225.1_cds_AMC95282.1_625	0.294232	0.460841	0.258752
lcl|CP014225.1_cds_AMC95283.1_626	0.277961	0.495921	0.248943
lcl|CP014225.1_cds_AMC95284.1_627	0.309564	0.62406	0.278344
lcl|CP014225.1_cds_AMC95285.1_628	0.320147	0.68583	0.277286
lcl|CP014225.1_cds_AMC95286.1_629	0.280081	0.503546	0.237069
lcl|CP014225.1_cds_AMC95287.1_630	0.273368	0.3969	0.241316
lcl|CP014225.1_cds_AMC95288.1_631	0.301127	0.44455	0.26185
lcl|CP014225.1_cds_AMC95289.1_632	0.270739	0.452902	0.237932
lcl|CP014225.1_cds_AMC95290.1_633	0.284022	0.400891	0.25215
lcl|CP014225.1_cds_AMC95291.1_634	0.304439	0.539093	0.26508
lcl|CP014225.1_cds_AMC95292.1_636	0.344167	0.697837	0.290859
lcl|CP014225.1_cds_AMC95293.1_637	0.295931	0.539241	0.268741
lcl|CP014225.1_cds_AMC95294.1_638	0.298067	0.491152	0.266013
lcl|CP014225.1_cds_AMC95295.1_639	0.300352	0.513753	0.271272
lcl|CP014225.1_cds_AMC95296.1_640	0.314827	0.758258	0.293377
lcl|CP014225.1_cds_AMC95297.1_641	0.312279	0.611553	0.269868
lcl|CP014225.1_cds_AMC95298.1_642	0.299502	0.393302	0.260475
lcl|CP014225.1_cds_AMC95299.1_643	0.305939	0.571429	0.264056
lcl|CP014225.1_cds_AMC95300.1_644	0.316526	0.500382	0.280899
lcl|CP014225.1_cds_AMC95301.1_645	0.301338	0.43393	0.27232
lcl|CP014225.1_cds_AMC95302.1_646	0.26211	0.415624	0.236092
lcl|CP014225.1_cds_AMC95303.1_647	0.284599	0.343554	0.249758
lcl|CP014225.1_cds_AMC95304.1_648	0.266159	0.278747	0.231259
lcl|CP014225.1_cds_AMC95305.1_649	0.286178	0.449152	0.248914
lcl|CP014225.1_cds_AMC95306.1_650	0.298052	0.464741	0.25426
lcl|CP014225.1_cds_AMC95307.1_651	0.276834	0.396736	0.242211
lcl|CP014225.1_cds_AMC95308.1_652	0.300131	0.612918	0.26552
lcl|CP014225.1_cds_AMC95309.1_653	0.265286	0.432422	0.240399
lcl|CP014225.1_cds_AMC95310.1_654	0.282034	0.576716	0.254684
lcl|CP014225.1_cds_AMC95311.1_655	0.332059	0.573993	0.29676
lcl|CP014225.1_cds_AMC95312.1_656	0.331153	0.624925	0.290192
lcl|CP014225.1_cds_AMC95313.1_657	0.293938	0.483436	0.272818
lcl|CP014225.1_cds_AMC95314.1_658	0.304846	0.456032	0.27988
lcl|CP014225.1_cds_AMC95315.1_659	0.323294	0.46533	0.286934
lcl|CP014225.1_cds_AMC95316.1_660	0.284428	0.41785	0.251838
lcl|CP014225.1_cds_AMC95317.1_661	0.270124	0.405438	0.244545
lcl|CP014225.1_cds_AMC95318.1_662	0.290297	0.431351	0.259061
lcl|CP014225.1_cds_AMC95319.1_663	0.30221	0.5207	0.273463
lcl|CP014225.1_cds_AMC95320.1_664	0.254469	0.303869	0.224075
lcl|CP014225.1_cds_AMC95321.1_665	0.289851	0.406468	0.252892
lcl|CP014225.1_cds_AMC95322.1_666	0.3089	0.445467	0.27957
lcl|CP014225.1_cds_AMC95323.1_668	0.27105	0.351815	0.239357
lcl|CP014225.1_cds_AMC95324.1_669	0.285116	0.422136	0.25477
lcl|CP014225.1_cds_AMC95325.1_670	0.303976	0.470867	0.262497
lcl|CP014225.1_cds_AMC95326.1_671	0.302835	0.519743	0.266722
lcl|CP014225.1_cds_AMC95327.1_672	0.338	0.520546	0.299227
lcl|CP014225.1_cds_AMC95328.1_673	0.247091	0.298244	0.225481
lcl|CP014225.1_cds_AMC95329.1_674	0.262434	0.388879	0.221052
lcl|CP014225.1_cds_AMC95330.1_675	0.30375	0.421441	0.264194
lcl|CP014225.1_cds_AMC95331.1_676	0.31944	0.504586	0.288316
lcl|CP014225.1_cds_AMC95332.1_677	0.315952	0.63295	0.279802
lcl|CP014225.1_cds_AMC95333.1_678	0.30268	0.53618	0.263382
lcl|CP014225.1_cds_AMC95334.1_679	0.312838	0.588623	0.278739
lcl|CP014225.1_cds_AMC95335.1_680	0.280611	0.49674	0.245413
lcl|CP014225.1_cds_AMC95336.1_681	0.300775	0.586733	0.270143
lcl|CP014225.1_cds_AMC95337.1_682	0.294609	0.532976	0.26086
lcl|CP014225.1_cds_AMC95338.1_683	0.289934	0.531107	0.25386
lcl|CP014225.1_cds_AMC95339.1_684	0.305364	0.603354	0.268463
lcl|CP014225.1_cds_AMC95340.1_685	0.340704	0.744219	0.30777
lcl|CP014225.1_cds_AMC95341.1_686	0.295314	0.543727	0.259264
lcl|CP014225.1_cds_AMC95342.1_687	0.265331	0.386808	0.239222
lcl|CP014225.1_cds_AMC95343.1_688	0.316028	0.572733	0.276678
lcl|CP014225.1_cds_AMC95344.1_689	0.274185	0.413457	0.25791
lcl|CP014225.1_cds_AMC95345.1_690	0.289727	0.502456	0.251546
lcl|CP014225.1_cds_AMC95346.1_691	0.344027	0.716754	0.31087
lcl|CP014225.1_cds_AMC95347.1_692	0.26782	0.33554	0.243008
lcl|CP014225.1_cds_AMC95348.1_693	0.276981	0.42981	0.242259
lcl|CP014225.1_cds_AMC95349.1_694	0.292753	0.41198	0.257984
lcl|CP014225.1_cds_AMC95350.1_695	0.306987	0.419487	0.27638
lcl|CP014225.1_cds_AMC95351.1_696	0.32949	0.733418	0.290587
lcl|CP014225.1_cds_AMC95352.1_697	0.279787	0.3694	0.250384
lcl|CP014225.1_cds_AMC95353.1_698	0.300091	0.403283	0.244682
lcl|CP014225.1_cds_AMC95354.1_699	0.302739	0.51195	0.269556
lcl|CP014225.1_cds_AMC95355.1_700	0.301196	0.545012	0.267758
lcl|CP014225.1_cds_AMC95356.1_701	0.315334	0.575692	0.274777
lcl|CP014225.1_cds_AMC95357.1_702	0.282827	0.454227	0.250469
lcl|CP014225.1_cds_AMC95358.1_703	0.29651	0.545984	0.257862
lcl|CP014225.1_cds_AMC95359.1_704	0.336865	0.444506	0.287995
lcl|CP014225.1_cds_AMC95360.1_705	0.31245	0.614863	0.282557
lcl|CP014225.1_cds_AMC95361.1_706	0.289347	0.565433	0.259979
lcl|CP014225.1_cds_AMC95362.1_707	0.283324	0.466688	0.246076
lcl|CP014225.1_cds_AMC95363.1_708	0.326511	0.595792	0.28003
lcl|CP014225.1_cds_AMC95364.1_709	0.330514	0.736255	0.3038
lcl|CP014225.1_cds_AMC95365.1_710	0.345426	0.641392	0.303623
lcl|CP014225.1_cds_AMC95366.1_711	0.352376	0.755648	0.302056
lcl|CP014225.1_cds_AMC95367.1_712	0.289054	0.483673	0.255564
lcl|CP014225.1_cds_AMC95368.1_713	0.283919	0.430466	0.246131
lcl|CP014225.1_cds_AMC95369.1_714	0.313423	0.486394	0.280261
lcl|CP014225.1_cds_AMC95370.1_715	0.313217	0.550139	0.279874
lcl|CP014225.1_cds_AMC95371.1_716	0.310319	0.652108	0.27429
lcl|CP014225.1_cds_AMC95372.1_717	0.315744	0.62056	0.277328
lcl|CP014225.1_cds_AMC95373.1_718	0.295504	0.584749	0.260194
lcl|CP014225.1_cds_AMC95374.1_719	0.337324	0.71532	0.29435
lcl|CP014225.1_cds_AMC95375.1_720	0.316909	0.588444	0.277142
lcl|CP014225.1_cds_AMC95376.1_721	0.295733	0.493286	0.268651
lcl|CP014225.1_cds_AMC95377.1_722	0.317116	0.587432	0.273191
lcl|CP014225.1_cds_AMC95378.1_723	0.304841	0.546256	0.272184
lcl|CP014225.1_cds_AMC95379.1_724	0.310353	0.558902	0.265909
lcl|CP014225.1_cds_AMC95380.1_725	0.319197	0.71221	0.287057
lcl|CP014225.1_cds_AMC95381.1_726	0.308679	0.57422	0.2762
lcl|CP014225.1_cds_AMC95382.1_727	0.267163	0.437448	0.230225
lcl|CP014225.1_cds_AMC95383.1_728	0.317103	0.499024	0.274335
lcl|CP014225.1_cds_AMC95384.1_729	0.298999	0.539515	0.268861
lcl|CP014225.1_cds_AMC95385.1_730	0.301601	0.556638	0.267805
lcl|CP014225.1_cds_AMC95386.1_731	0.29133	0.487502	0.259088
lcl|CP014225.1_cds_AMC95387.1_732	0.288057	0.45953	0.266564
lcl|CP014225.1_cds_AMC95388.1_733	0.298355	0.617024	0.259979
lcl|CP014225.1_cds_AMC95389.1_734	0.320222	0.674984	0.283344
lcl|CP014225.1_cds_AMC95390.1_735	0.321905	0.661516	0.289386
lcl|CP014225.1_cds_AMC95391.1_736	0.271358	0.337577	0.238575
lcl|CP014225.1_cds_AMC95392.1_737	0.29104	0.355967	0.264213
lcl|CP014225.1_cds_AMC95393.1_738	0.285772	0.540442	0.258523
lcl|CP014225.1_cds_AMC95394.1_739	0.283695	0.424563	0.259137
lcl|CP014225.1_cds_AMC95395.1_740	0.307044	0.363302	0.267601
lcl|CP014225.1_cds_AMC95396.1_741	0.297461	0.524774	0.26763
lcl|CP014225.1_cds_AMC95397.1_742	0.304232	0.378584	0.26217
lcl|CP014225.1_cds_AMC95398.1_743	0.32297	0.472967	0.289968
lcl|CP014225.1_cds_AMC95399.1_745	0.289703	0.5565	0.257206
lcl|CP014225.1_cds_AMC95400.1_746	0.341544	0.634813	0.307484
lcl|CP014225.1_cds_AMC95401.1_747	0.285656	0.572848	0.259323
lcl|CP014225.1_cds_AMC95402.1_748	0.289647	0.585832	0.260708
lcl|CP014225.1_cds_AMC95403.1_749	0.319429	0.638472	0.288474
lcl|CP014225.1_cds_AMC95404.1_750	0.289242	0.538615	0.260885
lcl|CP014225.1_cds_AMC95405.1_752	0.281166	0.515635	0.256499
lcl|CP014225.1_cds_AMC95406.1_753	0.287235	0.560251	0.259453
lcl|CP014225.1_cds_AMC95407.1_754	0.325091	0.699025	0.291206
lcl|CP014225.1_cds_AMC95408.1_755	0.283247	0.422379	0.24518
lcl|CP014225.1_cds_AMC95409.1_756	0.300144	0.490413	0.269112
lcl|CP014225.1_cds_AMC95410.1_757	0.327576	0.680476	0.290793
lcl|CP014225.1_cds_AMC95411.1_758	0.308138	0.546535	0.272089
lcl|CP014225.1_cds_AMC95412.1_759	0.306199	0.579503	0.266238
lcl|CP014225.1_cds_AMC95413.1_760	0.277734	0.453664	0.240518
lcl|CP014225.1_cds_AMC95414.1_761	0.330505	0.589214	0.284939
lcl|CP014225.1_cds_AMC95415.1_762	0.293078	0.576896	0.26966
lcl|CP014225.1_cds_AMC95416.1_763	0.297793	0.484915	0.258959
lcl|CP014225.1_cds_AMC95417.1_764	0.311841	0.568422	0.272082
lcl|CP014225.1_cds_AMC95418.1_765	0.267359	0.349898	0.230508
lcl|CP014225.1_cds_AMC95419.1_766	0.308152	0.538136	0.279567
lcl|CP014225.1_cds_AMC95420.1_767	0.297884	0.524716	0.264411
lcl|CP014225.1_cds_AMC95421.1_768	0.311715	0.54956	0.258482
lcl|CP014225.1_cds_AMC95422.1_769	0.292677	0.578771	0.25613
lcl|CP014225.1_cds_AMC95423.1_770	0.261461	0.406524	0.237888
lcl|CP014225.1_cds_AMC95424.1_771	0.305379	0.537846	0.269303
lcl|CP014225.1_cds_AMC95425.1_772	0.36493	0.730371	0.318211
lcl|CP014225.1_cds_AMC95426.1_773	0.283585	0.477561	0.266878
lcl|CP014225.1_cds_AMC95427.1_774	0.315394	0.653068	0.274594
lcl|CP014225.1_cds_AMC95428.1_775	0.307565	0.546092	0.272087
lcl|CP014225.1_cds_AMC95429.1_776	0.277021	0.448298	0.252695
lcl|CP014225.1_cds_AMC95430.1_777	0.318855	0.654424	0.283543
lcl|CP014225.1_cds_AMC95431.1_778	0.25659	0.498787	0.237609
lcl|CP014225.1_cds_AMC95432.1_779	0.286603	0.448171	0.261863
lcl|CP014225.1_cds_AMC95433.1_780	0.28551	0.462442	0.260615
lcl|CP014225.1_cds_AMC95434.1_781	0.289511	0.507766	0.257211
lcl|CP014225.1_cds_AMC95435.1_782	0.302316	0.514877	0.271575
lcl|CP014225.1_cds_AMC95436.1_783	0.284945	0.475838	0.257458
lcl|CP014225.1_cds_AMC95437.1_784	0.309718	0.54761	0.271681
lcl|CP014225.1_cds_AMC95438.1_785	0.281244	0.513684	0.256043
lcl|CP014225.1_cds_AMC95439.1_786	0.25816	0.431171	0.229396
lcl|CP014225.1_cds_AMC95440.1_787	0.290352	0.54206	0.257569
lcl|CP014225.1_cds_AMC95441.1_788	0.275788	0.428744	0.250516
lcl|CP014225.1_cds_AMC95442.1_789	0.275094	0.473519	0.253839
lcl|CP014225.1_cds_AMC95443.1_790	0.309102	0.53851	0.265818
lcl|CP014225.1_cds_AMC95444.1_791	0.305525	0.529803	0.264371
lcl|CP014225.1_cds_AMC95445.1_792	0.333076	0.528537	0.294578
lcl|CP014225.1_cds_AMC95446.1_794	0.302394	0.547916	0.268298
lcl|CP014225.1_cds_AMC95447.1_795	0.341899	0.720433	0.301725
lcl|CP014225.1_cds_AMC95448.1_796	0.323842	0.652509	0.278734
lcl|CP014225.1_cds_AMC95449.1_797	0.299656	0.584916	0.262555
lcl|CP014225.1_cds_AMC95450.1_798	0.322599	0.560289	0.281654
lcl|CP014225.1_cds_AMC95451.1_799	0.304084	0.484549	0.271888
lcl|CP014225.1_cds_AMC95452.1_800	0.297625	0.447796	0.257686
lcl|CP014225.1_cds_AMC95453.1_801	0.343361	0.459378	0.27752
lcl|CP014225.1_cds_AMC95454.1_802	0.280232	0.517305	0.267818
lcl|CP014225.1_cds_AMC95455.1_803	0.3084	0.528133	0.272498
lcl|CP014225.1_cds_AMC95456.1_804	0.321155	0.520839	0.284828
lcl|CP014225.1_cds_AMC95457.1_805	0.340667	0.753038	0.303514
lcl|CP014225.1_cds_AMC95458.1_807	0.294134	0.486171	0.262784
lcl|CP014225.1_cds_AMC95459.1_808	0.26358	0.514941	0.257005
lcl|CP014225.1_cds_AMC95460.1_809	0.338654	0.634929	0.296152
lcl|CP014225.1_cds_AMC95461.1_810	0.31024	0.610659	0.269189
lcl|CP014225.1_cds_AMC95462.1_811	0.329141	0.596704	0.283433
lcl|CP014225.1_cds_AMC95463.1_812	0.32824	0.615162	0.288054
lcl|CP014225.1_cds_AMC95464.1_813	0.3355	0.652307	0.293885
lcl|CP014225.1_cds_AMC95465.1_814	0.289773	0.503041	0.254109
lcl|CP014225.1_cds_AMC95466.1_815	0.337624	0.686913	0.301027
lcl|CP014225.1_cds_AMC95467.1_816	0.345013	0.792033	0.299896
lcl|CP014225.1_cds_AMC95468.1_817	0.280929	0.45352	0.243603
lcl|CP014225.1_cds_AMC95469.1_818	0.306638	0.537708	0.266034
lcl|CP014225.1_cds_AMC95470.1_819	0.29818	0.510533	0.260861
lcl|CP014225.1_cds_AMC95471.1_820	0.298035	0.504598	0.267372
lcl|CP014225.1_cds_AMC95472.1_821	0.314508	0.644409	0.276601
lcl|CP014225.1_cds_AMC95473.1_822	0.295101	0.55746	0.259044
lcl|CP014225.1_cds_AMC95474.1_823	0.28137	0.646366	0.260651
lcl|CP014225.1_cds_AMC95475.1_824	0.318524	0.666336	0.28451
lcl|CP014225.1_cds_AMC95476.1_825	0.295238	0.547049	0.270565
lcl|CP014225.1_cds_AMC95477.1_826	0.333652	0.647526	0.297419
lcl|CP014225.1_cds_AMC95478.1_827	0.333955	0.747425	0.301614
lcl|CP014225.1_cds_AMC95479.1_828	0.346421	0.748484	0.311977
lcl|CP014225.1_cds_AMC95480.1_829	0.312243	0.617969	0.276451
lcl|CP014225.1_cds_AMC95481.1_830	0.318706	0.602719	0.27137
lcl|CP014225.1_cds_AMC95482.1_831	0.343152	0.772761	0.30897
lcl|CP014225.1_cds_AMC95483.1_832	0.288418	0.514723	0.252324
lcl|CP014225.1_cds_AMC95484.1_833	0.268791	0.409231	0.242212
lcl|CP014225.1_cds_AMC95485.1_834	0.281814	0.506294	0.251067
lcl|CP014225.1_cds_AMC95486.1_835	0.284746	0.448524	0.253131
lcl|CP014225.1_cds_AMC95487.1_836	0.297757	0.568343	0.264151
lcl|CP014225.1_cds_AMC95488.1_837	0.293781	0.510243	0.270372
lcl|CP014225.1_cds_AMC95489.1_838	0.262191	0.502557	0.228251
lcl|CP014225.1_cds_AMC95490.1_839	0.296786	0.523848	0.26269
lcl|CP014225.1_cds_AMC95491.1_840	0.291964	0.473968	0.253403
lcl|CP014225.1_cds_AMC95492.1_841	0.292437	0.431213	0.250732
lcl|CP014225.1_cds_AMC95493.1_842	0.268226	0.493029	0.230938
lcl|CP014225.1_cds_AMC95494.1_844	0.299536	0.536002	0.25764
lcl|CP014225.1_cds_AMC95495.1_845	0.30778	0.540043	0.271307
lcl|CP014225.1_cds_AMC95496.1_846	0.315885	0.504078	0.268868
lcl|CP014225.1_cds_AMC95497.1_847	0.296107	0.560262	0.263419
lcl|CP014225.1_cds_AMC95498.1_848	0.283909	0.496059	0.242776
lcl|CP014225.1_cds_AMC95499.1_849	0.347148	0.803919	0.307902
lcl|CP014225.1_cds_AMC95500.1_850	0.318466	0.632007	0.277625
lcl|CP014225.1_cds_AMC95501.1_851	0.353905	0.663458	0.303991
lcl|CP014225.1_cds_AMC95502.1_852	0.299401	0.536153	0.266655
lcl|CP014225.1_cds_AMC95503.1_853	0.276821	0.47206	0.243586
lcl|CP014225.1_cds_AMC95504.1_854	0.287572	0.463534	0.260993
lcl|CP014225.1_cds_AMC95505.1_855	0.324472	0.677733	0.287345
lcl|CP014225.1_cds_AMC95506.1_856	0.307698	0.526771	0.271338
lcl|CP014225.1_cds_AMC95507.1_858	0.280324	0.452526	0.244391
lcl|CP014225.1_cds_AMC95508.1_859	0.297783	0.483744	0.2708
lcl|CP014225.1_cds_AMC95509.1_860	0.272251	0.530335	0.240942
lcl|CP014225.1_cds_AMC95510.1_861	0.291776	0.442877	0.267224
lcl|CP014225.1_cds_AMC95511.1_864	0.310835	0.474268	0.272289
lcl|CP014225.1_cds_AMC95512.1_865	0.330471	0.668978	0.29539
lcl|CP014225.1_cds_AMC95513.1_866	0.299142	0.489034	0.276679
lcl|CP014225.1_cds_AMC95514.1_867	0.329944	0.666416	0.298099
lcl|CP014225.1_cds_AMC95515.1_868	0.299008	0.503209	0.270622
lcl|CP014225.1_cds_AMC95516.1_869	0.308547	0.58787	0.26556
lcl|CP014225.1_cds_AMC95517.1_870	0.337424	0.686498	0.299271
lcl|CP014225.1_cds_AMC95518.1_871	0.254421	0.461548	0.230137
lcl|CP014225.1_cds_AMC95519.1_872	0.284238	0.46539	0.251991
lcl|CP014225.1_cds_AMC95520.1_873	0.299262	0.491202	0.268904
lcl|CP014225.1_cds_AMC95521.1_874	0.295151	0.439174	0.258285
lcl|CP014225.1_cds_AMC95522.1_875	0.25961	0.278097	0.241831
lcl|CP014225.1_cds_AMC95523.1_876	0.291997	0.493206	0.258634
lcl|CP014225.1_cds_AMC95524.1_877	0.278006	0.492886	0.24608
lcl|CP014225.1_cds_AMC95525.1_878	0.324454	0.622186	0.288582
lcl|CP014225.1_cds_AMC95526.1_879	0.272102	0.268523	0.250286
lcl|CP014225.1_cds_AMC95527.1_880	0.26829	0.4129	0.2391
lcl|CP014225.1_cds_AMC95528.1_881	0.264133	0.448858	0.235398
lcl|CP014225.1_cds_AMC95529.1_882	0.359793	0.79152	0.313537
lcl|CP014225.1_cds_AMC95530.1_883	0.274112	0.480175	0.245547
lcl|CP014225.1_cds_AMC95531.1_884	0.329333	0.675807	0.284849
lcl|CP014225.1_cds_AMC95532.1_885	0.280578	0.355919	0.234851
lcl|CP014225.1_cds_AMC95533.1_886	0.291873	0.52184	0.256235
lcl|CP014225.1_cds_AMC95534.1_887	0.2757	0.431857	0.25017
lcl|CP014225.1_cds_AMC95535.1_888	0.286686	0.476543	0.256341
lcl|CP014225.1_cds_AMC95536.1_889	0.314655	0.534599	0.272243
lcl|CP014225.1_cds_AMC95537.1_890	0.255449	0.454116	0.226031
lcl|CP014225.1_cds_AMC95538.1_891	0.278379	0.406003	0.250238
lcl|CP014225.1_cds_AMC95539.1_893	0.334609	0.609859	0.294403
lcl|CP014225.1_cds_AMC95540.1_894	0.279115	0.495054	0.246199
lcl|CP014225.1_cds_AMC95541.1_895	0.315227	0.587945	0.281576
lcl|CP014225.1_cds_AMC95542.1_896	0.32797	0.574397	0.285824
lcl|CP014225.1_cds_AMC95543.1_897	0.238705	0.298975	0.221165
lcl|CP014225.1_cds_AMC95544.1_898	0.324868	0.542922	0.30154
lcl|CP014225.1_cds_AMC95545.1_899	0.293122	0.499042	0.260484
lcl|CP014225.1_cds_AMC95546.1_900	0.297651	0.525033	0.258258
lcl|CP014225.1_cds_AMC95547.1_901	0.31566	0.566156	0.277977
lcl|CP014225.1_cds_AMC95548.1_902	0.265162	0.396555	0.231964
lcl|CP014225.1_cds_AMC95549.1_903	0.263439	0.379522	0.236799
lcl|CP014225.1_cds_AMC95550.1_905	0.282394	0.396089	0.252473
lcl|CP014225.1_cds_AMC95551.1_906	0.351362	0.727648	0.311092
lcl|CP014225.1_cds_AMC95552.1_907	0.293878	0.442623	0.266212
lcl|CP014225.1_cds_AMC95553.1_908	0.312979	0.562002	0.268864
lcl|CP014225.1_cds_AMC95554.1_909	0.346462	0.737894	0.305655
lcl|CP014225.1_cds_AMC95555.1_910	0.353439	0.641297	0.311828
lcl|CP014225.1_cds_AMC95556.1_913	0.358417	0.691243	0.312817
lcl|CP014225.1_cds_AMC95557.1_914	0.282576	0.354471	0.256291
lcl|CP014225.1_cds_AMC95558.1_915	0.288619	0.496198	0.260191
lcl|CP014225.1_cds_AMC95559.1_916	0.304563	0.536966	0.281592
lcl|CP014225.1_cds_AMC95560.1_917	0.316979	0.497401	0.282369
lcl|CP014225.1_cds_AMC95561.1_918	0.295767	0.454039	0.260243
lcl|CP014225.1_cds_AMC95562.1_919	0.279002	0.417811	0.245346
lcl|CP014225.1_cds_AMC95563.1_920	0.320132	0.581304	0.295719
lcl|CP014225.1_cds_AMC95564.1_921	0.282405	0.407449	0.257431
lcl|CP014225.1_cds_AMC95565.1_923	0.253398	0.265938	0.226904
lcl|CP014225.1_cds_AMC95566.1_924	0.291619	0.353822	0.257578
lcl|CP014225.1_cds_AMC95567.1_925	0.277782	0.324353	0.252002
lcl|CP014225.1_cds_AMC95568.1_926	0.275007	0.429661	0.244454
lcl|CP014225.1_cds_AMC95569.1_927	0.270854	0.421542	0.245502
lcl|CP014225.1_cds_AMC95570.1_928	0.272118	0.371373	0.245949
lcl|CP014225.1_cds_AMC95571.1_929	0.276519	0.36938	0.247886
lcl|CP014225.1_cds_AMC95572.1_930	0.292527	0.44175	0.264211
lcl|CP014225.1_cds_AMC95573.1_931	0.278961	0.4376	0.248526
lcl|CP014225.1_cds_AMC95574.1_932	0.290473	0.464132	0.257084
lcl|CP014225.1_cds_AMC95575.1_933	0.271577	0.416937	0.247313
lcl|CP014225.1_cds_AMC95576.1_934	0.293375	0.523072	0.254135
lcl|CP014225.1_cds_AMC95577.1_935	0.304781	0.539029	0.277007
lcl|CP014225.1_cds_AMC95578.1_936	0.270886	0.432522	0.242766
lcl|CP014225.1_cds_AMC95579.1_937	0.287905	0.476102	0.261104
lcl|CP014225.1_cds_AMC95580.1_939	0.286361	0.2935	0.246068
lcl|CP014225.1_cds_AMC95581.1_940	0.288283	0.544628	0.253092
lcl|CP014225.1_cds_AMC95582.1_941	0.306971	0.502886	0.279174
lcl|CP014225.1_cds_AMC95583.1_942	0.2885	0.529364	0.263916
lcl|CP014225.1_cds_AMC95584.1_943	0.296933	0.430327	0.256746
lcl|CP014225.1_cds_AMC95585.1_944	0.297058	0.435181	0.252643
lcl|CP014225.1_cds_AMC95586.1_945	0.276701	0.367894	0.240409
lcl|CP014225.1_cds_AMC95587.1_946	0.301154	0.371126	0.265535
lcl|CP014225.1_cds_AMC95588.1_947	0.293905	0.417316	0.260946
lcl|CP014225.1_cds_AMC95589.1_948	0.291347	0.347238	0.26306
lcl|CP014225.1_cds_AMC95590.1_949	0.270756	0.278267	0.240523
lcl|CP014225.1_cds_AMC95591.1_950	0.310247	0.59491	0.272068
lcl|CP014225.1_cds_AMC95592.1_951	0.293177	0.524035	0.263419
lcl|CP014225.1_cds_AMC95593.1_952	0.328909	0.689605	0.290945
lcl|CP014225.1_cds_AMC95594.1_953	0.308165	0.633678	0.271656
lcl|CP014225.1_cds_AMC95595.1_954	0.285121	0.468743	0.255946
lcl|CP014225.1_cds_AMC95596.1_955	0.292476	0.461817	0.260141
lcl|CP014225.1_cds_AMC95597.1_956	0.317457	0.57519	0.26405
lcl|CP014225.1_cds_AMC95598.1_957	0.278927	0.475791	0.222302
lcl|CP014225.1_cds_AMC95599.1_958	0.267684	0.402423	0.249237
lcl|CP014225.1_cds_AMC95600.1_959	0.28474	0.398192	0.246422
lcl|CP014225.1_cds_AMC95601.1_960	0.338195	0.588924	0.295852
lcl|CP014225.1_cds_AMC95602.1_961	0.297034	0.570131	0.263744
lcl|CP014225.1_cds_AMC95603.1_962	0.282179	0.444328	0.253462
lcl|CP014225.1_cds_AMC95604.1_963	0.301183	0.513049	0.26464
lcl|CP014225.1_cds_AMC95605.1_964	0.298404	0.597946	0.269508
lcl|CP014225.1_cds_AMC95606.1_965	0.296189	0.503221	0.259256
lcl|CP014225.1_cds_AMC95607.1_966	0.313112	0.549689	0.274835
lcl|CP014225.1_cds_AMC95608.1_967	0.305682	0.513325	0.266622
lcl|CP014225.1_cds_AMC95609.1_968	0.307355	0.448983	0.270292
lcl|CP014225.1_cds_AMC95610.1_969	0.299267	0.560098	0.259056
lcl|CP014225.1_cds_AMC95611.1_970	0.319444	0.651318	0.285047
lcl|CP014225.1_cds_AMC95612.1_972	0.279322	0.490519	0.254217
lcl|CP014225.1_cds_AMC95613.1_973	0.292284	0.487734	0.258604
lcl|CP014225.1_cds_AMC95614.1_974	0.291533	0.489013	0.267486
lcl|CP014225.1_cds_AMC95615.1_975	0.325928	0.601572	0.283066
lcl|CP014225.1_cds_AMC95616.1_976	0.290106	0.537761	0.250192
lcl|CP014225.1_cds_AMC95617.1_977	0.323344	0.6297	0.286064
lcl|CP014225.1_cds_AMC95618.1_978	0.319706	0.585575	0.277915
lcl|CP014225.1_cds_AMC95619.1_979	0.250236	0.343381	0.232414
lcl|CP014225.1_cds_AMC95620.1_980	0.285378	0.484279	0.257913
lcl|CP014225.1_cds_AMC95621.1_981	0.325726	0.57252	0.279958
lcl|CP014225.1_cds_AMC95622.1_982	0.33357	0.684094	0.293226
lcl|CP014225.1_cds_AMC95623.1_984	0.311837	0.556602	0.276126
lcl|CP014225.1_cds_AMC95624.1_985	0.360268	0.775942	0.323154
lcl|CP014225.1_cds_AMC95625.1_986	0.300587	0.557569	0.274876
lcl|CP014225.1_cds_AMC95626.1_987	0.308793	0.592813	0.267177
lcl|CP014225.1_cds_AMC95627.1_988	0.298328	0.523509	0.267447
lcl|CP014225.1_cds_AMC95628.1_989	0.301252	0.56545	0.269032
lcl|CP014225.1_cds_AMC95629.1_990	0.269544	0.550901	0.250092
lcl|CP014225.1_cds_AMC95630.1_991	0.316939	0.606389	0.272458
lcl|CP014225.1_cds_AMC95631.1_992	0.273565	0.432994	0.249256
lcl|CP014225.1_cds_AMC95632.1_993	0.303584	0.529262	0.272826
lcl|CP014225.1_cds_AMC95633.1_994	0.326626	0.616862	0.294805
lcl|CP014225.1_cds_AMC95634.1_995	0.282698	0.476101	0.250437
lcl|CP014225.1_cds_AMC95635.1_996	0.314084	0.621559	0.27884
lcl|CP014225.1_cds_AMC95636.1_997	0.307154	0.505843	0.269389
lcl|CP014225.1_cds_AMC95637.1_998	0.281198	0.533667	0.255259
lcl|CP014225.1_cds_AMC95638.1_999	0.304547	0.713618	0.277707
lcl|CP014225.1_cds_AMC95639.1_1001	0.303275	0.585108	0.270968
lcl|CP014225.1_cds_AMC95640.1_1003	0.328915	0.607159	0.285709
lcl|CP014225.1_cds_AMC95641.1_1004	0.304442	0.564336	0.273403
lcl|CP014225.1_cds_AMC95642.1_1005	0.308103	0.62968	0.274628
lcl|CP014225.1_cds_AMC95643.1_1006	0.284715	0.633824	0.262334
lcl|CP014225.1_cds_AMC95644.1_1007	0.338478	0.758664	0.298322
lcl|CP014225.1_cds_AMC95645.1_1008	0.306919	0.666561	0.272053
lcl|CP014225.1_cds_AMC95646.1_1009	0.309271	0.625696	0.274012
lcl|CP014225.1_cds_AMC95647.1_1010	0.273305	0.581279	0.249148
lcl|CP014225.1_cds_AMC95648.1_1012	0.297061	0.585209	0.267276
lcl|CP014225.1_cds_AMC95649.1_1014	0.316169	0.649022	0.288676
lcl|CP014225.1_cds_AMC95650.1_1015	0.323119	0.59645	0.284219
lcl|CP014225.1_cds_AMC95651.1_1016	0.291715	0.602404	0.258198
lcl|CP014225.1_cds_AMC95652.1_1017	0.310221	0.593317	0.28245
lcl|CP014225.1_cds_AMC95653.1_1018	0.309784	0.545755	0.277775
lcl|CP014225.1_cds_AMC95654.1_1019	0.303211	0.588815	0.282957
lcl|CP014225.1_cds_AMC95655.1_1020	0.321404	0.597162	0.284615
lcl|CP014225.1_cds_AMC95656.1_1021	0.280506	0.402614	0.249208
lcl|CP014225.1_cds_AMC95657.1_1022	0.279038	0.444904	0.253842
lcl|CP014225.1_cds_AMC95658.1_1023	0.303795	0.520195	0.268562
lcl|CP014225.1_cds_AMC95659.1_1024	0.297762	0.534568	0.266059
lcl|CP014225.1_cds_AMC95660.1_1025	0.287533	0.472492	0.252416
lcl|CP014225.1_cds_AMC95661.1_1026	0.283616	0.45437	0.260244
lcl|CP014225.1_cds_AMC95662.1_1027	0.286731	0.435443	0.254969
lcl|CP014225.1_cds_AMC95663.1_1028	0.326583	0.549358	0.287465
lcl|CP014225.1_cds_AMC95664.1_1029	0.289451	0.506324	0.252625
lcl|CP014225.1_cds_AMC95665.1_1030	0.287559	0.447937	0.248568
lcl|CP014225.1_cds_AMC95666.1_1031	0.287925	0.509149	0.247197
lcl|CP014225.1_cds_AMC95667.1_1032	0.301691	0.525038	0.265061
lcl|CP014225.1_cds_AMC95668.1_1033	0.295706	0.521299	0.260588
lcl|CP014225.1_cds_AMC95669.1_1034	0.272315	0.476626	0.252464
lcl|CP014225.1_cds_AMC95670.1_1035	0.302756	0.44929	0.259777
lcl|CP014225.1_cds_AMC95671.1_1036	0.292262	0.455763	0.265986
lcl|CP014225.1_cds_AMC95672.1_1037	0.291604	0.476692	0.2574
lcl|CP014225.1_cds_AMC95673.1_1038	0.314369	0.613277	0.273333
lcl|CP014225.1_cds_AMC95674.1_1039	0.328195	0.643243	0.288821
lcl|CP014225.1_cds_AMC95675.1_1040	0.291365	0.402493	0.254961
lcl|CP014225.1_cds_AMC95676.1_1042	0.271288	0.387019	0.251833
lcl|CP014225.1_cds_AMC95677.1_1043	0.25652	0.344008	0.232921
lcl|CP014225.1_cds_AMC95678.1_1044	0.23517	0.286806	0.217527
lcl|CP014225.1_cds_AMC95679.1_1045	0.298473	0.455104	0.266495
lcl|CP014225.1_cds_AMC95680.1_1046	0.263614	0.295624	0.236342
lcl|CP014225.1_cds_AMC95681.1_1047	0.265777	0.334503	0.236845
lcl|CP014225.1_cds_AMC95682.1_1048	0.265918	0.355991	0.237569
lcl|CP014225.1_cds_AMC95683.1_1049	0.32739	0.576071	0.28842
lcl|CP014225.1_cds_AMC95684.1_1050	0.323294	0.650218	0.287399
lcl|CP014225.1_cds_AMC95685.1_1051	0.310091	0.607917	0.277574
lcl|CP014225.1_cds_AMC95686.1_1052	0.279712	0.552516	0.251524
lcl|CP014225.1_cds_AMC95687.1_1053	0.277884	0.487272	0.253196
lcl|CP014225.1_cds_AMC95688.1_1054	0.261735	0.482858	0.233601
lcl|CP014225.1_cds_AMC95689.1_1055	0.296192	0.524748	0.256296
lcl|CP014225.1_cds_AMC95690.1_1056	0.282834	0.500254	0.24991
lcl|CP014225.1_cds_AMC95691.1_1057	0.287704	0.441206	0.25442
lcl|CP014225.1_cds_AMC95692.1_1058	0.270168	0.44965	0.243944
lcl|CP014225.1_cds_AMC95693.1_1059	0.325854	0.653126	0.285873
lcl|CP014225.1_cds_AMC95694.1_1060	0.311247	0.534179	0.26433
lcl|CP014225.1_cds_AMC95695.1_1061	0.300018	0.512167	0.270596
lcl|CP014225.1_cds_AMC95696.1_1062	0.307964	0.523692	0.266191
lcl|CP014225.1_cds_AMC95697.1_1063	0.286179	0.501848	0.245713
lcl|CP014225.1_cds_AMC95698.1_1064	0.322103	0.433073	0.267394
lcl|CP014225.1_cds_AMC95699.1_1065	0.271463	0.387117	0.247086
lcl|CP014225.1_cds_AMC95700.1_1066	0.37995	0.848251	0.338689
lcl|CP014225.1_cds_AMC95701.1_1067	0.330675	0.678364	0.290095
lcl|CP014225.1_cds_AMC95702.1_1068	0.316399	0.569563	0.288305
lcl|CP014225.1_cds_AMC95703.1_1069	0.284553	0.412649	0.263505
lcl|CP014225.1_cds_AMC95704.1_1070	0.295503	0.46955	0.249894
lcl|CP014225.1_cds_AMC95705.1_1071	0.306111	0.590471	0.273867
lcl|CP014225.1_cds_AMC95706.1_1072	0.292905	0.458774	0.266684
lcl|CP014225.1_cds_AMC95707.1_1073	0.308409	0.503397	0.27231
lcl|CP014225.1_cds_AMC95708.1_1074	0.331874	0.627528	0.285423
lcl|CP014225.1_cds_AMC95709.1_1075	0.300843	0.549725	0.265661
lcl|CP014225.1_cds_AMC95710.1_1076	0.310541	0.578423	0.271511
lcl|CP014225.1_cds_AMC95711.1_1077	0.302832	0.548164	0.261359
lcl|CP014225.1_cds_AMC95712.1_1078	0.292035	0.485265	0.265606
lcl|CP014225.1_cds_AMC95713.1_1079	0.27675	0.506855	0.252305
lcl|CP014225.1_cds_AMC95714.1_1080	0.262952	0.212497	0.240557
lcl|CP014225.1_cds_AMC95715.1_1081	0.275057	0.427043	0.248042
lcl|CP014225.1_cds_AMC95716.1_1082	0.296162	0.536592	0.25863
lcl|CP014225.1_cds_AMC95717.1_1083	0.318722	0.570056	0.281932
lcl|CP014225.1_cds_AMC95718.1_1084	0.352355	0.769357	0.313957
lcl|CP014225.1_cds_AMC95719.1_1085	0.323297	0.691943	0.289886
lcl|CP014225.1_cds_AMC95720.1_1086	0.268696	0.461964	0.242737
lcl|CP014225.1_cds_AMC95721.1_1087	0.306603	0.580721	0.264174
lcl|CP014225.1_cds_AMC95722.1_1088	0.27927	0.468953	0.256162
lcl|CP014225.1_cds_AMC95723.1_1089	0.279463	0.447243	0.254228
lcl|CP014225.1_cds_AMC95724.1_1090	0.319138	0.639751	0.287417
lcl|CP014225.1_cds_AMC95725.1_1091	0.289432	0.461796	0.253032
lcl|CP014225.1_cds_AMC95726.1_1092	0.280679	0.4264	0.253727
lcl|CP014225.1_cds_AMC95727.1_1093	0.296177	0.488846	0.267095
lcl|CP014225.1_cds_AMC95728.1_1094	0.313646	0.587558	0.27023
lcl|CP014225.1_cds_AMC95729.1_1095	0.278175	0.575974	0.262626
lcl|CP014225.1_cds_AMC95730.1_1096	0.268464	0.41238	0.241597
lcl|CP014225.1_cds_AMC95731.1_1097	0.35441	0.679613	0.304962
lcl|CP014225.1_cds_AMC95732.1_1098	0.288993	0.534599	0.256172
lcl|CP014225.1_cds_AMC95733.1_1099	0.278079	0.453279	0.247307
lcl|CP014225.1_cds_AMC95734.1_1100	0.314631	0.613976	0.269525
lcl|CP014225.1_cds_AMC95735.1_1101	0.323398	0.636529	0.27694
lcl|CP014225.1_cds_AMC95736.1_1102	0.314631	0.547435	0.278114
lcl|CP014225.1_cds_AMC95737.1_1103	0.304738	0.536993	0.265487
lcl|CP014225.1_cds_AMC95738.1_1104	0.281021	0.471308	0.251722
lcl|CP014225.1_cds_AMC95739.1_1105	0.299289	0.524419	0.266242
lcl|CP014225.1_cds_AMC95740.1_1106	0.307709	0.540386	0.267963
lcl|CP014225.1_cds_AMC95741.1_1107	0.289912	0.514701	0.259017
lcl|CP014225.1_cds_AMC95742.1_1108	0.265087	0.366315	0.240741
lcl|CP014225.1_cds_AMC95743.1_1109	0.27518	0.447813	0.238931
lcl|CP014225.1_cds_AMC95744.1_1110	0.295904	0.529312	0.261443
lcl|CP014225.1_cds_AMC95745.1_1111	0.248673	0.359863	0.228749
lcl|CP014225.1_cds_AMC95746.1_1112	0.315099	0.639613	0.281187
lcl|CP014225.1_cds_AMC95747.1_1113	0.306101	0.585381	0.264644
lcl|CP014225.1_cds_AMC95748.1_1114	0.308233	0.485997	0.276016
lcl|CP014225.1_cds_AMC95749.1_1115	0.298157	0.439137	0.263357
lcl|CP014225.1_cds_AMC95750.1_1116	0.244945	0.346015	0.221065
lcl|CP014225.1_cds_AMC95751.1_1117	0.256171	0.397587	0.235703
lcl|CP014225.1_cds_AMC95752.1_1118	0.277498	0.424738	0.248328
lcl|CP014225.1_cds_AMC95753.1_1119	0.307487	0.526949	0.273934
lcl|CP014225.1_cds_AMC95754.1_1120	0.321841	0.553707	0.280221
lcl|CP014225.1_cds_AMC95755.1_1121	0.302073	0.543306	0.272156
lcl|CP014225.1_cds_AMC95756.1_1122	0.300905	0.516137	0.260766
lcl|CP014225.1_cds_AMC95757.1_1123	0.309945	0.531235	0.280601
lcl|CP014225.1_cds_AMC95758.1_1124	0.300294	0.539804	0.266075
lcl|CP014225.1_cds_AMC95759.1_1125	0.298455	0.551178	0.258042
lcl|CP014225.1_cds_AMC95760.1_1126	0.255802	0.428551	0.235046
lcl|CP014225.1_cds_AMC95761.1_1127	0.285207	0.468092	0.2578
lcl|CP014225.1_cds_AMC95762.1_1128	0.316683	0.54631	0.278689
lcl|CP014225.1_cds_AMC95763.1_1129	0.303609	0.53111	0.261209
lcl|CP014225.1_cds_AMC95764.1_1130	0.308901	0.563595	0.269079
lcl|CP014225.1_cds_AMC95765.1_1131	0.292425	0.481273	0.257169
lcl|CP014225.1_cds_AMC95766.1_1132	0.28639	0.420119	0.254747
lcl|CP014225.1_cds_AMC95767.1_1134	0.276507	0.357142	0.246598
lcl|CP014225.1_cds_AMC95768.1_1135	0.281714	0.309425	0.246621
lcl|CP014225.1_cds_AMC95769.1_1136	0.278691	0.315375	0.239427
lcl|CP014225.1_cds_AMC95770.1_1138	0.300055	0.396579	0.257175
lcl|CP014225.1_cds_AMC95771.1_1139	0.273806	0.305271	0.247479
lcl|CP014225.1_cds_AMC95772.1_1140	0.279895	0.329985	0.240273
lcl|CP014225.1_cds_AMC95773.1_1141	0.294186	0.275989	0.255606
lcl|CP014225.1_cds_AMC95774.1_1142	0.288533	0.339643	0.252616
lcl|CP014225.1_cds_AMC95775.1_1143	0.287852	0.387455	0.247442
lcl|CP014225.1_cds_AMC95776.1_1144	0.269016	0.359286	0.24652
lcl|CP014225.1_cds_AMC95777.1_1145	0.318199	0.33387	0.279639
lcl|CP014225.1_cds_AMC95778.1_1147	0.264166	0.380124	0.244308
lcl|CP014225.1_cds_AMC95779.1_1148	0.272712	0.366777	0.24435
lcl|CP014225.1_cds_AMC95780.1_1149	0.264649	0.260982	0.23435
lcl|CP014225.1_cds_AMC95781.1_1150	0.283694	0.36473	0.245838
lcl|CP014225.1_cds_AMC95782.1_1151	0.289377	0.458565	0.253189
lcl|CP014225.1_cds_AMC95783.1_1152	0.290755	0.511418	0.263351
lcl|CP014225.1_cds_AMC95784.1_1153	0.281831	0.522447	0.256136
lcl|CP014225.1_cds_AMC95785.1_1154	0.279303	0.437536	0.257243
lcl|CP014225.1_cds_AMC95786.1_1155	0.284095	0.414696	0.251557
lcl|CP014225.1_cds_AMC95787.1_1156	0.336128	0.652252	0.305061
lcl|CP014225.1_cds_AMC95788.1_1157	0.321452	0.635395	0.287696
lcl|CP014225.1_cds_AMC95789.1_1158	0.337588	0.732481	0.301009
lcl|CP014225.1_cds_AMC95790.1_1160	0.329423	0.597461	0.28601
lcl|CP014225.1_cds_AMC95791.1_1161	0.295053	0.473734	0.26121
lcl|CP014225.1_cds_AMC95792.1_1162	0.253862	0.400732	0.234827
lcl|CP014225.1_cds_AMC95793.1_1163	0.271393	0.341958	0.238827
lcl|CP014225.1_cds_AMC95794.1_1164	0.30777	0.569302	0.279158
lcl|CP014225.1_cds_AMC95795.1_1165	0.300929	0.564585	0.271707
lcl|CP014225.1_cds_AMC95796.1_1166	0.316527	0.556997	0.276634
lcl|CP014225.1_cds_AMC95797.1_1167	0.309731	0.613471	0.272586
lcl|CP014225.1_cds_AMC95798.1_1168	0.286774	0.452231	0.256114
lcl|CP014225.1_cds_AMC95799.1_1169	0.306854	0.541868	0.277416
lcl|CP014225.1_cds_AMC95800.1_1170	0.308457	0.528913	0.271041
lcl|CP014225.1_cds_AMC95801.1_1171	0.252044	0.437349	0.230765
lcl|CP014225.1_cds_AMC95802.1_1172	0.284902	0.503374	0.257013
lcl|CP014225.1_cds_AMC95803.1_1174	0.289323	0.43158	0.254502
lcl|CP014225.1_cds_AMC95804.1_1175	0.285329	0.313261	0.273633
lcl|CP014225.1_cds_AMC95805.1_1176	0.280599	0.463568	0.252942
lcl|CP014225.1_cds_AMC95806.1_1177	0.351542	0.758122	0.313764
lcl|CP014225.1_cds_AMC95807.1_1178	0.341744	0.721418	0.30094
lcl|CP014225.1_cds_AMC95808.1_1179	0.304825	0.522376	0.269108
lcl|CP014225.1_cds_AMC95809.1_1180	0.311475	0.584659	0.278468
lcl|CP014225.1_cds_AMC95810.1_1181	0.287163	0.472411	0.255317
lcl|CP014225.1_cds_AMC95811.1_1182	0.309311	0.610903	0.273356
lcl|CP014225.1_cds_AMC95812.1_1183	0.274567	0.367964	0.237043
lcl|CP014225.1_cds_AMC95813.1_1184	0.333811	0.601082	0.298814
lcl|CP014225.1_cds_AMC95814.1_1185	0.319766	0.595249	0.281275
lcl|CP014225.1_cds_AMC95815.1_1186	0.279591	0.498401	0.244852
lcl|CP014225.1_cds_AMC95816.1_1187	0.327902	0.593833	0.289086
lcl|CP014225.1_cds_AMC95817.1_1189	0.279729	0.441723	0.250355
lcl|CP014225.1_cds_AMC95818.1_1190	0.323273	0.709099	0.290056
lcl|CP014225.1_cds_AMC95819.1_1191	0.324974	0.752247	0.297672
lcl|CP014225.1_cds_AMC95820.1_1192	0.324165	0.643868	0.289821
lcl|CP014225.1_cds_AMC95821.1_1193	0.294839	0.541409	0.262375
lcl|CP014225.1_cds_AMC95822.1_1194	0.277884	0.523859	0.257328
lcl|CP014225.1_cds_AMC95823.1_1195	0.321039	0.631981	0.290439
lcl|CP014225.1_cds_AMC95824.1_1196	0.307437	0.547772	0.279408
lcl|CP014225.1_cds_AMC95825.1_1197	0.309136	0.427167	0.277392
lcl|CP014225.1_cds_AMC95826.1_1198	0.276244	0.385688	0.245075
lcl|CP014225.1_cds_AMC95827.1_1199	0.329305	0.641719	0.289518
lcl|CP014225.1_cds_AMC95828.1_1201	0.250693	0.317478	0.224969
lcl|CP014225.1_cds_AMC95829.1_1202	0.287991	0.480675	0.26541
lcl|CP014225.1_cds_AMC95830.1_1203	0.312202	0.614223	0.279503
lcl|CP014225.1_cds_AMC95831.1_1204	0.300982	0.504099	0.269748
lcl|CP014225.1_cds_AMC95832.1_1205	0.313619	0.611952	0.282949
lcl|CP014225.1_cds_AMC95833.1_1206	0.300266	0.553209	0.261226
lcl|CP014225.1_cds_AMC95834.1_1207	0.293186	0.423089	0.255269
lcl|CP014225.1_cds_AMC95835.1_1208	0.304979	0.575667	0.268124
lcl|CP014225.1_cds_AMC95836.1_1209	0.288645	0.45672	0.251639
lcl|CP014225.1_cds_AMC95837.1_1210	0.325313	0.589937	0.278056
lcl|CP014225.1_cds_AMC95838.1_1211	0.351076	0.835923	0.307746
lcl|CP014225.1_cds_AMC95839.1_1212	0.360424	0.795459	0.324487
lcl|CP014225.1_cds_AMC95840.1_1213	0.292239	0.494885	0.263547
lcl|CP014225.1_cds_AMC95841.1_1214	0.284415	0.433445	0.246463
lcl|CP014225.1_cds_AMC95842.1_1215	0.294161	0.479587	0.256766
lcl|CP014225.1_cds_AMC95843.1_1216	0.312234	0.534129	0.274941
lcl|CP014225.1_cds_AMC95844.1_1217	0.307663	0.552388	0.270533
lcl|CP014225.1_cds_AMC95845.1_1218	0.313274	0.511278	0.271
lcl|CP014225.1_cds_AMC95846.1_1219	0.265873	0.392131	0.240902
lcl|CP014225.1_cds_AMC95847.1_1220	0.345231	0.814173	0.303907
lcl|CP014225.1_cds_AMC95848.1_1221	0.313025	0.528649	0.278226
lcl|CP014225.1_cds_AMC95849.1_1222	0.331103	0.72245	0.28301
lcl|CP014225.1_cds_AMC95850.1_1223	0.325656	0.660036	0.285323
lcl|CP014225.1_cds_AMC95851.1_1224	0.269762	0.381318	0.238885
lcl|CP014225.1_cds_AMC95852.1_1225	0.258925	0.313145	0.230469
lcl|CP014225.1_cds_AMC95853.1_1226	0.284037	0.412715	0.252069
lcl|CP014225.1_cds_AMC95854.1_1227	0.340958	0.747724	0.306973
lcl|CP014225.1_cds_AMC95855.1_1228	0.327882	0.617475	0.291485
lcl|CP014225.1_cds_AMC95856.1_1229	0.306242	0.543673	0.282824
lcl|CP014225.1_cds_AMC95857.1_1230	0.316888	0.64046	0.272435
lcl|CP014225.1_cds_AMC95858.1_1231	0.296714	0.53283	0.263521
lcl|CP014225.1_cds_AMC95859.1_1232	0.338626	0.653052	0.295637
lcl|CP014225.1_cds_AMC95860.1_1233	0.316863	0.550468	0.264418
lcl|CP014225.1_cds_AMC95861.1_1234	0.302309	0.546649	0.274622
lcl|CP014225.1_cds_AMC95862.1_1235	0.273349	0.40088	0.239754
lcl|CP014225.1_cds_AMC95863.1_1236	0.309356	0.525287	0.286533
lcl|CP014225.1_cds_AMC95864.1_1237	0.32219	0.54802	0.273064
lcl|CP014225.1_cds_AMC95865.1_1238	0.297722	0.538225	0.25603
lcl|CP014225.1_cds_AMC95866.1_1239	0.319908	0.664183	0.285112
lcl|CP014225.1_cds_AMC95867.1_1240	0.295143	0.548189	0.25598
lcl|CP014225.1_cds_AMC95868.1_1241	0.316034	0.51607	0.271864
lcl|CP014225.1_cds_AMC95869.1_1242	0.342697	0.684078	0.298042
lcl|CP014225.1_cds_AMC95870.1_1243	0.337301	0.627346	0.288033
lcl|CP014225.1_cds_AMC95871.1_1244	0.288223	0.396702	0.249385
lcl|CP014225.1_cds_AMC95872.1_1245	0.336675	0.716437	0.294803
lcl|CP014225.1_cds_AMC95873.1_1246	0.316191	0.614401	0.289005
lcl|CP014225.1_cds_AMC95874.1_1247	0.271808	0.476252	0.242438
lcl|CP014225.1_cds_AMC95875.1_1248	0.341851	0.564396	0.298977
lcl|CP014225.1_cds_AMC95876.1_1249	0.30994	0.577475	0.267143
lcl|CP014225.1_cds_AMC95877.1_1250	0.316291	0.645282	0.28281
lcl|CP014225.1_cds_AMC95878.1_1251	0.284223	0.533894	0.251207
lcl|CP014225.1_cds_AMC95879.1_1252	0.286692	0.46737	0.260766
lcl|CP014225.1_cds_AMC95880.1_1253	0.277273	0.408972	0.242856
lcl|CP014225.1_cds_AMC95881.1_1255	0.299133	0.491871	0.265506
lcl|CP014225.1_cds_AMC95882.1_1256	0.270024	0.341314	0.244452
lcl|CP014225.1_cds_AMC95883.1_1257	0.261165	0.367626	0.239761
lcl|CP014225.1_cds_AMC95884.1_1258	0.314428	0.606053	0.271377
lcl|CP014225.1_cds_AMC95885.1_1259	0.293017	0.294405	0.249278
lcl|CP014225.1_cds_AMC95886.1_1260	0.289863	0.523639	0.25637
lcl|CP014225.1_cds_AMC95887.1_1261	0.320347	0.622869	0.279556
lcl|CP014225.1_cds_AMC95888.1_1262	0.305897	0.616185	0.271113
lcl|CP014225.1_cds_AMC95889.1_1263	0.293798	0.51659	0.268206
lcl|CP014225.1_cds_AMC95890.1_1264	0.279813	0.480691	0.252825
lcl|CP014225.1_cds_AMC95891.1_1265	0.300697	0.546166	0.276543
lcl|CP014225.1_cds_AMC95892.1_1266	0.292145	0.491837	0.259667
lcl|CP014225.1_cds_AMC95893.1_1267	0.29382	0.494452	0.255142
lcl|CP014225.1_cds_AMC95894.1_1268	0.302444	0.484752	0.271948
lcl|CP014225.1_cds_AMC95895.1_1269	0.277398	0.479999	0.239723
lcl|CP014225.1_cds_AMC95896.1_1270	0.294523	0.489974	0.260697
lcl|CP014225.1_cds_AMC95897.1_1271	0.28482	0.416191	0.252195
lcl|CP014225.1_cds_AMC95898.1_1272	0.283895	0.43442	0.255332
lcl|CP014225.1_cds_AMC95899.1_1273	0.303253	0.503415	0.271913
lcl|CP014225.1_cds_AMC95900.1_1274	0.313984	0.635857	0.277055
lcl|CP014225.1_cds_AMC95901.1_1275	0.312852	0.587625	0.270213
lcl|CP014225.1_cds_AMC95902.1_1276	0.315396	0.610922	0.280551
lcl|CP014225.1_cds_AMC95903.1_1277	0.245485	0.546912	0.223032
lcl|CP014225.1_cds_AMC95904.1_1278	0.299957	0.528295	0.26224
lcl|CP014225.1_cds_AMC95905.1_1279	0.300538	0.509224	0.268687
lcl|CP014225.1_cds_AMC95906.1_1280	0.320844	0.722316	0.279297
lcl|CP014225.1_cds_AMC95907.1_1281	0.313439	0.623708	0.277395
lcl|CP014225.1_cds_AMC95908.1_1282	0.31141	0.647141	0.279018
lcl|CP014225.1_cds_AMC95909.1_1283	0.299207	0.639798	0.267594
lcl|CP014225.1_cds_AMC95910.1_1284	0.275608	0.360639	0.235039
lcl|CP014225.1_cds_AMC95911.1_1285	0.317374	0.463016	0.278275
lcl|CP014225.1_cds_AMC95912.1_1287	0.300021	0.489096	0.262302
lcl|CP014225.1_cds_AMC95913.1_1288	0.330169	0.550834	0.286963
lcl|CP014225.1_cds_AMC95914.1_1289	0.297652	0.562929	0.261734
lcl|CP014225.1_cds_AMC95915.1_1290	0.329623	0.586148	0.288961
lcl|CP014225.1_cds_AMC95916.1_1291	0.318879	0.589765	0.278789
lcl|CP014225.1_cds_AMC95917.1_1293	0.293568	0.521778	0.26259
lcl|CP014225.1_cds_AMC95918.1_1294	0.293485	0.488423	0.267269
lcl|CP014225.1_cds_AMC95919.1_1295	0.302274	0.486033	0.266506
lcl|CP014225.1_cds_AMC95920.1_1296	0.251746	0.385344	0.232226
lcl|CP014225.1_cds_AMC95921.1_1297	0.334536	0.673148	0.293063
lcl|CP014225.1_cds_AMC95922.1_1298	0.308499	0.535709	0.276584
lcl|CP014225.1_cds_AMC95923.1_1299	0.293243	0.46916	0.256823
lcl|CP014225.1_cds_AMC95924.1_1300	0.294252	0.427925	0.25967
lcl|CP014225.1_cds_AMC95925.1_1301	0.314141	0.64742	0.275086
lcl|CP014225.1_cds_AMC95926.1_1302	0.296431	0.508316	0.258961
lcl|CP014225.1_cds_AMC95927.1_1303	0.299154	0.531431	0.267116
lcl|CP014225.1_cds_AMC95928.1_1304	0.330828	0.643557	0.287563
lcl|CP014225.1_cds_AMC95929.1_1305	0.291284	0.482173	0.255167
lcl|CP014225.1_cds_AMC95930.1_1306	0.284952	0.419062	0.260145
lcl|CP014225.1_cds_AMC95931.1_1307	0.276298	0.375593	0.247219
lcl|CP014225.1_cds_AMC95932.1_1308	0.28277	0.533532	0.251913
lcl|CP014225.1_cds_AMC95933.1_1309	0.34239	0.662655	0.295405
lcl|CP014225.1_cds_AMC95934.1_1310	0.323977	0.497535	0.291867
lcl|CP014225.1_cds_AMC95935.1_1311	0.288031	0.433107	0.258218
lcl|CP014225.1_cds_AMC95936.1_1312	0.261467	0.254915	0.23477
lcl|CP014225.1_cds_AMC95937.1_1313	0.334239	0.665756	0.293947
lcl|CP014225.1_cds_AMC95938.1_1314	0.313752	0.652019	0.28577
lcl|CP014225.1_cds_AMC95939.1_1315	0.324176	0.637611	0.281482
lcl|CP014225.1_cds_AMC95940.1_1316	0.290643	0.557953	0.256059
lcl|CP014225.1_cds_AMC95941.1_1317	0.269546	0.537253	0.245311
lcl|CP014225.1_cds_AMC95942.1_1318	0.280519	0.42622	0.255239
lcl|CP014225.1_cds_AMC95943.1_1319	0.287106	0.452137	0.260621
lcl|CP014225.1_cds_AMC95944.1_1320	0.312008	0.594826	0.27217
lcl|CP014225.1_cds_AMC95945.1_1321	0.277755	0.426663	0.249277
lcl|CP014225.1_cds_AMC95946.1_1322	0.315416	0.626383	0.289069
lcl|CP014225.1_cds_AMC95947.1_1323	0.311681	0.595834	0.27139
lcl|CP014225.1_cds_AMC95948.1_1324	0.278344	0.46873	0.23892
lcl|CP014225.1_cds_AMC95949.1_1325	0.278856	0.41183	0.252097
lcl|CP014225.1_cds_AMC95950.1_1326	0.294751	0.415962	0.270964
lcl|CP014225.1_cds_AMC95951.1_1327	0.340015	0.630356	0.295542
lcl|CP014225.1_cds_AMC95952.1_1328	0.29683	0.416522	0.276822
lcl|CP014225.1_cds_AMC95953.1_1329	0.334405	0.604842	0.290427
lcl|CP014225.1_cds_AMC95954.1_1330	0.272712	0.366777	0.24435
lcl|CP014225.1_cds_AMC95955.1_1331	0.264166	0.380124	0.244308
lcl|CP014225.1_cds_AMC95956.1_1332	0.283831	0.418919	0.243527
lcl|CP014225.1_cds_AMC95957.1_1333	0.306161	0.353804	0.266777
lcl|CP014225.1_cds_AMC95958.1_1334	0.286437	0.377423	0.250812
lcl|CP014225.1_cds_AMC95959.1_1335	0.290272	0.432697	0.259072
lcl|CP014225.1_cds_AMC95960.1_1336	0.255285	0.358989	0.231283
lcl|CP014225.1_cds_AMC95961.1_1337	0.321123	0.528399	0.283871
lcl|CP014225.1_cds_AMC95962.1_1340	0.331352	0.62908	0.288232
lcl|CP014225.1_cds_AMC95963.1_1341	0.299148	0.534916	0.264856
lcl|CP014225.1_cds_AMC95964.1_1342	0.30063	0.59487	0.269516
lcl|CP014225.1_cds_AMC95965.1_1344	0.316687	0.576601	0.27794
lcl|CP014225.1_cds_AMC95966.1_1345	0.293005	0.530569	0.257548
lcl|CP014225.1_cds_AMC95967.1_1346	0.302826	0.543504	0.258539
lcl|CP014225.1_cds_AMC95968.1_1347	0.308982	0.584667	0.270675
lcl|CP014225.1_cds_AMC95969.1_1348	0.268343	0.425516	0.245223
lcl|CP014225.1_cds_AMC95970.1_1349	0.289143	0.445567	0.257271
lcl|CP014225.1_cds_AMC95971.1_1351	0.321448	0.650032	0.290856
lcl|CP014225.1_cds_AMC95972.1_1352	0.288199	0.509323	0.254997
lcl|CP014225.1_cds_AMC95973.1_1353	0.307517	0.5918	0.275395
lcl|CP014225.1_cds_AMC95974.1_1354	0.378182	0.775245	0.341806
lcl|CP014225.1_cds_AMC95975.1_1355	0.294957	0.441136	0.26646
lcl|CP014225.1_cds_AMC95976.1_1356	0.355463	0.762112	0.318711
lcl|CP014225.1_cds_AMC95977.1_1357	0.291567	0.474307	0.24489
lcl|CP014225.1_cds_AMC95978.1_1358	0.294985	0.567736	0.258308
lcl|CP014225.1_cds_AMC95979.1_1359	0.302476	0.607448	0.26117
lcl|CP014225.1_cds_AMC95980.1_1360	0.300642	0.553714	0.266522
lcl|CP014225.1_cds_AMC95981.1_1362	0.339012	0.601723	0.307897
lcl|CP014225.1_cds_AMC95982.1_1363	0.309164	0.55321	0.277142
lcl|CP014225.1_cds_AMC95983.1_1364	0.306531	0.65178	0.270373
lcl|CP014225.1_cds_AMC95984.1_1365	0.298034	0.55274	0.264776
lcl|CP014225.1_cds_AMC95985.1_1366	0.311003	0.577186	0.2729
lcl|CP014225.1_cds_AMC95986.1_1367	0.303342	0.555512	0.274456
lcl|CP014225.1_cds_AMC95987.1_1368	0.317526	0.617612	0.277327
lcl|CP014225.1_cds_AMC95988.1_1369	0.297535	0.527205	0.266261
lcl|CP014225.1_cds_AMC95989.1_1370	0.300804	0.435184	0.270158
lcl|CP014225.1_cds_AMC95990.1_1371	0.32085	0.491049	0.288332
lcl|CP014225.1_cds_AMC95991.1_1372	0.266718	0.384362	0.244174
lcl|CP014225.1_cds_AMC95992.1_1373	0.299586	0.5928	0.261647
lcl|CP014225.1_cds_AMC95993.1_1374	0.296798	0.497757	0.26118
lcl|CP014225.1_cds_AMC95994.1_1375	0.29643	0.50263	0.265815
lcl|CP014225.1_cds_AMC95995.1_1377	0.311274	0.578539	0.268179
lcl|CP014225.1_cds_AMC95996.1_1378	0.314854	0.620121	0.277661
lcl|CP014225.1_cds_AMC95997.1_1379	0.288195	0.44798	0.257345
lcl|CP014225.1_cds_AMC95998.1_1380	0.322603	0.651466	0.28661
lcl|CP014225.1_cds_AMC95999.1_1381	0.344452	0.790761	0.306736
lcl|CP014225.1_cds_AMC96000.1_1383	0.325401	0.639496	0.290597
lcl|CP014225.1_cds_AMC96001.1_1384	0.289966	0.438436	0.254561
lcl|CP014225.1_cds_AMC96002.1_1385	0.264794	0.413373	0.253363
lcl|CP014225.1_cds_AMC96003.1_1386	0.321551	0.552174	0.288058
lcl|CP014225.1_cds_AMC96004.1_1387	0.322537	0.62038	0.283031
lcl|CP014225.1_cds_AMC96005.1_1388	0.308077	0.453346	0.276006
lcl|CP014225.1_cds_AMC96006.1_1389	0.29551	0.465638	0.272167
lcl|CP014225.1_cds_AMC96007.1_1390	0.350539	0.611631	0.302081
lcl|CP014225.1_cds_AMC96008.1_1391	0.298543	0.584184	0.26225
lcl|CP014225.1_cds_AMC96009.1_1392	0.313849	0.542705	0.273182
lcl|CP014225.1_cds_AMC96010.1_1393	0.287902	0.456275	0.24626
lcl|CP014225.1_cds_AMC96011.1_1394	0.29486	0.498518	0.266524
lcl|CP014225.1_cds_AMC96012.1_1395	0.267549	0.436953	0.235088
lcl|CP014225.1_cds_AMC96013.1_1396	0.322877	0.542173	0.290131
lcl|CP014225.1_cds_AMC96014.1_1397	0.289496	0.554362	0.257928
lcl|CP014225.1_cds_AMC96015.1_1398	0.308501	0.544477	0.269011
lcl|CP014225.1_cds_AMC96016.1_1399	0.307332	0.531901	0.278589
lcl|CP014225.1_cds_AMC96017.1_1400	0.297745	0.612344	0.262766
lcl|CP014225.1_cds_AMC96018.1_1401	0.330859	0.660073	0.290769
lcl|CP014225.1_cds_AMC96019.1_1402	0.297784	0.504724	0.259525
lcl|CP014225.1_cds_AMC96020.1_1403	0.323296	0.654512	0.286892
lcl|CP014225.1_cds_AMC96021.1_1404	0.320912	0.575864	0.281767
lcl|CP014225.1_cds_AMC96022.1_1405	0.286882	0.40646	0.249741
lcl|CP014225.1_cds_AMC96023.1_1406	0.277424	0.336885	0.231475
lcl|CP014225.1_cds_AMC96024.1_1407	0.276893	0.371223	0.243987
lcl|CP014225.1_cds_AMC96025.1_1408	0.289385	0.326635	0.250363
lcl|CP014225.1_cds_AMC96026.1_1409	0.303749	0.555919	0.267923
lcl|CP014225.1_cds_AMC96027.1_1411	0.306225	0.607088	0.270276
lcl|CP014225.1_cds_AMC96028.1_1412	0.310141	0.585355	0.276568
lcl|CP014225.1_cds_AMC96029.1_1413	0.310772	0.546821	0.26856
lcl|CP014225.1_cds_AMC96030.1_1414	0.305491	0.445766	0.271705
lcl|CP014225.1_cds_AMC96031.1_1415	0.282137	0.397408	0.257378
lcl|CP014225.1_cds_AMC96032.1_1416	0.302895	0.529214	0.265271
lcl|CP014225.1_cds_AMC96033.1_1417	0.303354	0.626621	0.26984
lcl|CP014225.1_cds_AMC96034.1_1418	0.322471	0.551083	0.283163
lcl|CP014225.1_cds_AMC96035.1_1419	0.318515	0.566606	0.283521
lcl|CP014225.1_cds_AMC96036.1_1421	0.295288	0.61821	0.270449
lcl|CP014225.1_cds_AMC96037.1_1422	0.298779	0.58896	0.26892
lcl|CP014225.1_cds_AMC96038.1_1423	0.332512	0.590374	0.288971
lcl|CP014225.1_cds_AMC96039.1_1424	0.288388	0.497297	0.257873
lcl|CP014225.1_cds_AMC96040.1_1425	0.304145	0.557306	0.266616
lcl|CP014225.1_cds_AMC96041.1_1426	0.273569	0.45712	0.246156
lcl|CP014225.1_cds_AMC96042.1_1427	0.310495	0.512599	0.270518
lcl|CP014225.1_cds_AMC96043.1_1428	0.280223	0.383719	0.254113
lcl|CP014225.1_cds_AMC96044.1_1430	0.273647	0.407392	0.236446
lcl|CP014225.1_cds_AMC96045.1_1431	0.305513	0.559253	0.274866
lcl|CP014225.1_cds_AMC96046.1_1432	0.310604	0.560914	0.271573
lcl|CP014225.1_cds_AMC96047.1_1433	0.284766	0.456494	0.2559
lcl|CP014225.1_cds_AMC96048.1_1434	0.293759	0.491105	0.263095
lcl|CP014225.1_cds_AMC96049.1_1435	0.32818	0.623409	0.282023
lcl|CP014225.1_cds_AMC96050.1_1436	0.291123	0.506694	0.255351
lcl|CP014225.1_cds_AMC96051.1_1437	0.286624	0.435861	0.257529
lcl|CP014225.1_cds_AMC96052.1_1438	0.3045	0.593837	0.268409
lcl|CP014225.1_cds_AMC96053.1_1439	0.304596	0.537258	0.266493
lcl|CP014225.1_cds_AMC96054.1_1440	0.293307	0.467904	0.264854
lcl|CP014225.1_cds_AMC96055.1_1441	0.308284	0.607955	0.270581
lcl|CP014225.1_cds_AMC96056.1_1442	0.31186	0.545778	0.279729
lcl|CP014225.1_cds_AMC96057.1_1443	0.296374	0.579406	0.265569
lcl|CP014225.1_cds_AMC96058.1_1444	0.314195	0.59742	0.275949
lcl|CP014225.1_cds_AMC96059.1_1445	0.290845	0.516382	0.255999
lcl|CP014225.1_cds_AMC96060.1_1446	0.305857	0.583013	0.265585
lcl|CP014225.1_cds_AMC96061.1_1447	0.30326	0.4314	0.266457
lcl|CP014225.1_cds_AMC96062.1_1448	0.363637	0.76136	0.318192
lcl|CP014225.1_cds_AMC96063.1_1449	0.28076	0.417576	0.252301
lcl|CP014225.1_cds_AMC96064.1_1450	0.357464	0.800936	0.315953
lcl|CP014225.1_cds_AMC96065.1_1451	0.35602	0.73074	0.323642
lcl|CP014225.1_cds_AMC96066.1_1452	0.324624	0.618094	0.289975
lcl|CP014225.1_cds_AMC96067.1_1453	0.362603	0.759756	0.331703
lcl|CP014225.1_cds_AMC96068.1_1454	0.355861	0.750135	0.319403
lcl|CP014225.1_cds_AMC96069.1_1455	0.349567	0.7319	0.307957
lcl|CP014225.1_cds_AMC96070.1_1457	0.344589	0.678506	0.303037
lcl|CP014225.1_cds_AMC96071.1_1458	0.268899	0.377755	0.237558
lcl|CP014225.1_cds_AMC96072.1_1459	0.321379	0.588828	0.282972
lcl|CP014225.1_cds_AMC96073.1_1460	0.330838	0.661199	0.292728
lcl|CP014225.1_cds_AMC96074.1_1461	0.302116	0.535747	0.273071
lcl|CP014225.1_cds_AMC96075.1_1462	0.344777	0.699683	0.302786
lcl|CP014225.1_cds_AMC96076.1_1463	0.31221	0.519002	0.276164
lcl|CP014225.1_cds_AMC96077.1_1464	0.31999	0.554333	0.287776
lcl|CP014225.1_cds_AMC96078.1_1465	0.366425	0.698413	0.323312
lcl|CP014225.1_cds_AMC96079.1_1466	0.29202	0.478395	0.258017
lcl|CP014225.1_cds_AMC96080.1_1467	0.347148	0.702597	0.294047
lcl|CP014225.1_cds_AMC96081.1_1468	0.266924	0.415447	0.239038
lcl|CP014225.1_cds_AMC96082.1_1469	0.36261	0.798393	0.324519
lcl|CP014225.1_cds_AMC96083.1_1470	0.346415	0.733801	0.310581
lcl|CP014225.1_cds_AMC96084.1_1471	0.321412	0.57725	0.287135
lcl|CP014225.1_cds_AMC96085.1_1472	0.276137	0.411097	0.243492
lcl|CP014225.1_cds_AMC96086.1_1473	0.328337	0.658918	0.292035
lcl|CP014225.1_cds_AMC96087.1_1475	0.295458	0.480419	0.260844
lcl|CP014225.1_cds_AMC96088.1_1476	0.341839	0.655427	0.2969
lcl|CP014225.1_cds_AMC96089.1_1478	0.29333	0.481291	0.255048
lcl|CP014225.1_cds_AMC96090.1_1479	0.289346	0.476822	0.259203
lcl|CP014225.1_cds_AMC96091.1_1480	0.274865	0.411506	0.245906
lcl|CP014225.1_cds_AMC96092.1_1481	0.301823	0.534457	0.275534
lcl|CP014225.1_cds_AMC96093.1_1482	0.318125	0.569701	0.27763
lcl|CP014225.1_cds_AMC96094.1_1483	0.295988	0.445708	0.259235
lcl|CP014225.1_cds_AMC96095.1_1484	0.339359	0.652879	0.290162
lcl|CP014225.1_cds_AMC96096.1_1485	0.320412	0.602206	0.289357
lcl|CP014225.1_cds_AMC96097.1_1486	0.302527	0.534875	0.268199
lcl|CP014225.1_cds_AMC96098.1_1487	0.3198	0.566669	0.284484
lcl|CP014225.1_cds_AMC96099.1_1488	0.29864	0.549391	0.27443
lcl|CP014225.1_cds_AMC96100.1_1489	0.307138	0.540097	0.278373
lcl|CP014225.1_cds_AMC96101.1_1490	0.31967	0.524336	0.283172
lcl|CP014225.1_cds_AMC96102.1_1491	0.286497	0.482446	0.256326
lcl|CP014225.1_cds_AMC96103.1_1492	0.279728	0.460467	0.252711
lcl|CP014225.1_cds_AMC96104.1_1493	0.303665	0.581566	0.265015
lcl|CP014225.1_cds_AMC96105.1_1494	0.321094	0.570809	0.280644
lcl|CP014225.1_cds_AMC96106.1_1497	0.339492	0.730981	0.30113
lcl|CP014225.1_cds_AMC96107.1_1498	0.285837	0.460205	0.251856
lcl|CP014225.1_cds_AMC96108.1_1499	0.27126	0.362391	0.238902
lcl|CP014225.1_cds_AMC96109.1_1500	0.282203	0.424456	0.250712
lcl|CP014225.1_cds_AMC96110.1_1502	0.302444	0.484752	0.271948
lcl|CP014225.1_cds_AMC96111.1_1503	0.297425	0.385216	0.259737
lcl|CP014225.1_cds_AMC96112.1_1504	0.278427	0.371194	0.244138
lcl|CP014225.1_cds_AMC96113.1_1505	0.275048	0.385027	0.246148
lcl|CP014225.1_cds_AMC96114.1_1506	0.290065	0.452301	0.260799
lcl|CP014225.1_cds_AMC96115.1_1507	0.276427	0.500029	0.24904
lcl|CP014225.1_cds_AMC96116.1_1508	0.296506	0.589414	0.264421
lcl|CP014225.1_cds_AMC96117.1_1509	0.306927	0.590911	0.274852
lcl|CP014225.1_cds_AMC96118.1_1510	0.321406	0.595147	0.284095
lcl|CP014225.1_cds_AMC96119.1_1511	0.309872	0.611209	0.289157
lcl|CP014225.1_cds_AMC96120.1_1512	0.305412	0.491734	0.26746
lcl|CP014225.1_cds_AMC96121.1_1513	0.309102	0.563805	0.264527
lcl|CP014225.1_cds_AMC96122.1_1514	0.330508	0.679186	0.294889
lcl|CP014225.1_cds_AMC96123.1_1515	0.392778	0.822727	0.347038
lcl|CP014225.1_cds_AMC96124.1_1516	0.345587	0.734084	0.311282
lcl|CP014225.1_cds_AMC96125.1_1517	0.288748	0.449069	0.258975
lcl|CP014225.1_cds_AMC96126.1_1518	0.334504	0.659308	0.290886
lcl|CP014225.1_cds_AMC96127.1_1519	0.306958	0.524602	0.272613
lcl|CP014225.1_cds_AMC96128.1_1520	0.3168	0.564298	0.271328
lcl|CP014225.1_cds_AMC96129.1_1521	0.342496	0.721866	0.302779
lcl|CP014225.1_cds_AMC96130.1_1522	0.315823	0.53773	0.284343
lcl|CP014225.1_cds_AMC96131.1_1523	0.33404	0.633957	0.304594
lcl|CP014225.1_cds_AMC96132.1_1524	0.292106	0.437576	0.254093
lcl|CP014225.1_cds_AMC96133.1_1525	0.295197	0.489901	0.262963
lcl|CP014225.1_cds_AMC96134.1_1526	0.306842	0.551638	0.277253
lcl|CP014225.1_cds_AMC96135.1_1528	0.304426	0.48852	0.266223
lcl|CP014225.1_cds_AMC96136.1_1529	0.329714	0.634576	0.288647
lcl|CP014225.1_cds_AMC96137.1_1530	0.301515	0.523517	0.26364
lcl|CP014225.1_cds_AMC96138.1_1531	0.323766	0.596871	0.28402
lcl|CP014225.1_cds_AMC96139.1_1532	0.29569	0.518528	0.2574
lcl|CP014225.1_cds_AMC96140.1_1533	0.288184	0.46904	0.250046
lcl|CP014225.1_cds_AMC96141.1_1534	0.30507	0.560078	0.265911
lcl|CP014225.1_cds_AMC96142.1_1535	0.345716	0.727419	0.300265
lcl|CP014225.1_cds_AMC96143.1_1536	0.253991	0.41412	0.236834
lcl|CP014225.1_cds_AMC96144.1_1537	0.289441	0.461806	0.254247
lcl|CP014225.1_cds_AMC96145.1_1538	0.309644	0.566697	0.270132
lcl|CP014225.1_cds_AMC96146.1_1539	0.28473	0.537738	0.261443
lcl|CP014225.1_cds_AMC96147.1_1540	0.296719	0.334542	0.245135
lcl|CP014225.1_cds_AMC96148.1_1541	0.266246	0.358801	0.226184
lcl|CP014225.1_cds_AMC96149.1_1542	0.332671	0.669747	0.310368
lcl|CP014225.1_cds_AMC96150.1_1543	0.348624	0.731916	0.315796
lcl|CP014225.1_cds_AMC96151.1_1544	0.296193	0.566269	0.262459
lcl|CP014225.1_cds_AMC96152.1_1545	0.301667	0.511794	0.270351
lcl|CP014225.1_cds_AMC96153.1_1546	0.31383	0.660876	0.277148
lcl|CP014225.1_cds_AMC96154.1_1547	0.288624	0.458663	0.252236
lcl|CP014225.1_cds_AMC96155.1_1548	0.398189	0.656996	0.344221
lcl|CP014225.1_cds_AMC96156.1_1549	0.30703	0.516065	0.272934
lcl|CP014225.1_cds_AMC96157.1_1550	0.319688	0.468111	0.276191
lcl|CP014225.1_cds_AMC96158.1_1551	0.303778	0.405809	0.266542
lcl|CP014225.1_cds_AMC96159.1_1552	0.297631	0.523363	0.265751
lcl|CP014225.1_cds_AMC96160.1_1553	0.303771	0.51445	0.268384
lcl|CP014225.1_cds_AMC96161.1_1554	0.288484	0.486232	0.251559
lcl|CP014225.1_cds_AMC96162.1_1555	0.222527	0.244618	0.208643
lcl|CP014225.1_cds_AMC96163.1_1556	0.321105	0.566965	0.271915
lcl|CP014225.1_cds_AMC96164.1_1557	0.278948	0.422143	0.243159
lcl|CP014225.1_cds_AMC96165.1_1558	0.282047	0.488764	0.246598
lcl|CP014225.1_cds_AMC96166.1_1559	0.288773	0.401723	0.259866
lcl|CP014225.1_cds_AMC96167.1_1560	0.299711	0.486842	0.254191
lcl|CP014225.1_cds_AMC96168.1_1561	0.284531	0.459864	0.255861
lcl|CP014225.1_cds_AMC96169.1_1562	0.282028	0.426946	0.248006
lcl|CP014225.1_cds_AMC96170.1_1563	0.272961	0.416363	0.239753
lcl|CP014225.1_cds_AMC96171.1_1564	0.266504	0.48162	0.249988
lcl|CP014225.1_cds_AMC96172.1_1565	0.311658	0.471312	0.273925
lcl|CP014225.1_cds_AMC96173.1_1566	0.248446	0.330556	0.230522
lcl|CP014225.1_cds_AMC96174.1_1567	0.332136	0.560163	0.297565
lcl|CP014225.1_cds_AMC96175.1_1568	0.299872	0.516038	0.269758
lcl|CP014225.1_cds_AMC96176.1_1569	0.285253	0.456884	0.258035
lcl|CP014225.1_cds_AMC96177.1_1570	0.311649	0.533153	0.269124
lcl|CP014225.1_cds_AMC96178.1_1571	0.321434	0.50881	0.280997
lcl|CP014225.1_cds_AMC96179.1_1572	0.277099	0.294392	0.252396
lcl|CP014225.1_cds_AMC96180.1_1573	0.281992	0.418921	0.262182
lcl|CP014225.1_cds_AMC96181.1_1574	0.275727	0.384636	0.235841
lcl|CP014225.1_cds_AMC96182.1_1575	0.341409	0.667795	0.311604
lcl|CP014225.1_cds_AMC96183.1_1576	0.317417	0.613395	0.286251
lcl|CP014225.1_cds_AMC96184.1_1577	0.350105	0.660451	0.306501
lcl|CP014225.1_cds_AMC96185.1_1578	0.337328	0.672044	0.293996
lcl|CP014225.1_cds_AMC96186.1_1579	0.338821	0.624672	0.296062
lcl|CP014225.1_cds_AMC96187.1_1580	0.315221	0.638695	0.28335
lcl|CP014225.1_cds_AMC96188.1_1581	0.311827	0.545271	0.271356
lcl|CP014225.1_cds_AMC96189.1_1582	0.387723	0.755418	0.331715
lcl|CP014225.1_cds_AMC96190.1_1583	0.345494	0.621299	0.302416
lcl|CP014225.1_cds_AMC96191.1_1584	0.37032	0.723136	0.316649
lcl|CP014225.1_cds_AMC96192.1_1585	0.354806	0.702072	0.317122
lcl|CP014225.1_cds_AMC96193.1_1586	0.34578	0.719885	0.301752
lcl|CP014225.1_cds_AMC96194.1_1587	0.361341	0.740327	0.317417
lcl|CP014225.1_cds_AMC96195.1_1588	0.334384	0.650327	0.289178
lcl|CP014225.1_cds_AMC96196.1_1589	0.366228	0.715627	0.332379
lcl|CP014225.1_cds_AMC96197.1_1590	0.362288	0.70408	0.311858
lcl|CP014225.1_cds_AMC96198.1_1591	0.354794	0.643671	0.308594
lcl|CP014225.1_cds_AMC96199.1_1592	0.351241	0.796312	0.313006
lcl|CP014225.1_cds_AMC96200.1_1593	0.352931	0.633065	0.313333
lcl|CP014225.1_cds_AMC96201.1_1594	0.369777	0.717934	0.313306
lcl|CP014225.1_cds_AMC96202.1_1595	0.370575	0.779305	0.332526
lcl|CP014225.1_cds_AMC96203.1_1596	0.34921	0.714175	0.30122
lcl|CP014225.1_cds_AMC96204.1_1597	0.324068	0.574114	0.280808
lcl|CP014225.1_cds_AMC96205.1_1598	0.360891	0.769761	0.313841
lcl|CP014225.1_cds_AMC96206.1_1599	0.372702	0.788246	0.344739
lcl|CP014225.1_cds_AMC96207.1_1600	0.350928	0.756661	0.307236
lcl|CP014225.1_cds_AMC96208.1_1601	0.358785	0.766201	0.310501
lcl|CP014225.1_cds_AMC96209.1_1602	0.330339	0.700876	0.292305
lcl|CP014225.1_cds_AMC96210.1_1603	0.28548	0.399789	0.257983
lcl|CP014225.1_cds_AMC96211.1_1604	0.26792	0.357394	0.240183
lcl|CP014225.1_cds_AMC96212.1_1605	0.260417	0.29386	0.230808
lcl|CP014225.1_cds_AMC96213.1_1607	0.287688	0.443979	0.255265
lcl|CP014225.1_cds_AMC96214.1_1608	0.286079	0.418986	0.25669
lcl|CP014225.1_cds_AMC96215.1_1609	0.311067	0.470476	0.268413
lcl|CP014225.1_cds_AMC96216.1_1610	0.267086	0.428948	0.241754
lcl|CP014225.1_cds_AMC96217.1_1611	0.283578	0.382561	0.25815
lcl|CP014225.1_cds_AMC96218.1_1612	0.273266	0.397864	0.245898
lcl|CP014225.1_cds_AMC96219.1_1613	0.278357	0.42768	0.249457
lcl|CP014225.1_cds_AMC96220.1_1614	0.268842	0.410919	0.24813
lcl|CP014225.1_cds_AMC96221.1_1615	0.27233	0.409256	0.250165
lcl|CP014225.1_cds_AMC96222.1_1616	0.269045	0.408949	0.240828
lcl|CP014225.1_cds_AMC96223.1_1617	0.347515	0.519685	0.29523
lcl|CP014225.1_cds_AMC96224.1_1618	0.303978	0.565305	0.268939
lcl|CP014225.1_cds_AMC96225.1_1619	0.306987	0.612434	0.260578
lcl|CP014225.1_cds_AMC96226.1_1620	0.361355	0.847249	0.324088
lcl|CP014225.1_cds_AMC96227.1_1621	0.359136	0.800908	0.319389
lcl|CP014225.1_cds_AMC96228.1_1622	0.342377	0.63533	0.30306
lcl|CP014225.1_cds_AMC96229.1_1623	0.340597	0.72966	0.310227
lcl|CP014225.1_cds_AMC96230.1_1624	0.285131	0.406008	0.254066
lcl|CP014225.1_cds_AMC96231.1_1625	0.278102	0.429675	0.243046
lcl|CP014225.1_cds_AMC96232.1_1626	0.26301	0.435126	0.243312
lcl|CP014225.1_cds_AMC96233.1_1627	0.306048	0.558601	0.264805
lcl|CP014225.1_cds_AMC96234.1_1628	0.351612	0.672517	0.305301
lcl|CP014225.1_cds_AMC96235.1_1629	0.309734	0.579284	0.280398
lcl|CP014225.1_cds_AMC96236.1_1630	0.327871	0.831776	0.290984
lcl|CP014225.1_cds_AMC96237.1_1631	0.306962	0.57815	0.271533
lcl|CP014225.1_cds_AMC96238.1_1632	0.301179	0.48516	0.266201
lcl|CP014225.1_cds_AMC96239.1_1633	0.266312	0.474296	0.241175
lcl|CP014225.1_cds_AMC96240.1_1634	0.317261	0.611217	0.286422
lcl|CP014225.1_cds_AMC96241.1_1635	0.292692	0.536969	0.266873
lcl|CP014225.1_cds_AMC96242.1_1636	0.300066	0.484639	0.262674
lcl|CP014225.1_cds_AMC96243.1_1637	0.298264	0.543561	0.273929
lcl|CP014225.1_cds_AMC96244.1_1638	0.308487	0.585735	0.27489
lcl|CP014225.1_cds_AMC96245.1_1639	0.257758	0.304862	0.229878
lcl|CP014225.1_cds_AMC96246.1_1640	0.344551	0.662388	0.304614
lcl|CP014225.1_cds_AMC96247.1_1641	0.281463	0.450357	0.251509
lcl|CP014225.1_cds_AMC96248.1_1642	0.305051	0.622395	0.269132
lcl|CP014225.1_cds_AMC96249.1_1643	0.278931	0.490823	0.25474
lcl|CP014225.1_cds_AMC96250.1_1644	0.311375	0.547247	0.271197
lcl|CP014225.1_cds_AMC96251.1_1645	0.266988	0.328459	0.250964
lcl|CP014225.1_cds_AMC96252.1_1646	0.321693	0.664763	0.286216
lcl|CP014225.1_cds_AMC96253.1_1647	0.296027	0.579655	0.26678
lcl|CP014225.1_cds_AMC96254.1_1648	0.337649	0.745597	0.303219
lcl|CP014225.1_cds_AMC96255.1_1649	0.300755	0.722076	0.270915
lcl|CP014225.1_cds_AMC96256.1_1650	0.302067	0.601646	0.264783
lcl|CP014225.1_cds_AMC96257.1_1651	0.314514	0.562203	0.273253
lcl|CP014225.1_cds_AMC96258.1_1652	0.341953	0.671606	0.296973
lcl|CP014225.1_cds_AMC96259.1_1653	0.28534	0.546122	0.257669
lcl|CP014225.1_cds_AMC96260.1_1654	0.310148	0.691262	0.271018
lcl|CP014225.1_cds_AMC96261.1_1655	0.314912	0.566278	0.283965
lcl|CP014225.1_cds_AMC96262.1_1656	0.290818	0.611959	0.258725
lcl|CP014225.1_cds_AMC96263.1_1657	0.289175	0.540572	0.260452
lcl|CP014225.1_cds_AMC96264.1_1658	0.284167	0.519108	0.245009
lcl|CP014225.1_cds_AMC96265.1_1659	0.307949	0.564598	0.272226
lcl|CP014225.1_cds_AMC96266.1_1660	0.324452	0.624965	0.301957
lcl|CP014225.1_cds_AMC96267.1_1661	0.305944	0.548072	0.272051
lcl|CP014225.1_cds_AMC96268.1_1662	0.296525	0.54489	0.255005
lcl|CP014225.1_cds_AMC96269.1_1663	0.283327	0.531455	0.25668
lcl|CP014225.1_cds_AMC96270.1_1664	0.303609	0.481222	0.284999
lcl|CP014225.1_cds_AMC96271.1_1665	0.297183	0.476342	0.264371
lcl|CP014225.1_cds_AMC96272.1_1666	0.338482	0.692935	0.293837
lcl|CP014225.1_cds_AMC96273.1_1667	0.31091	0.540765	0.267835
lcl|CP014225.1_cds_AMC96274.1_1668	0.33439	0.605952	0.296531
lcl|CP014225.1_cds_AMC96275.1_1669	0.29912	0.5151	0.266533
lcl|CP014225.1_cds_AMC96276.1_1670	0.314027	0.581018	0.270442
lcl|CP014225.1_cds_AMC96277.1_1671	0.289194	0.488757	0.261302
lcl|CP014225.1_cds_AMC96278.1_1673	0.282234	0.448222	0.250376
lcl|CP014225.1_cds_AMC96279.1_1674	0.286027	0.366343	0.244507
lcl|CP014225.1_cds_AMC96280.1_1675	0.255287	0.408623	0.230679
lcl|CP014225.1_cds_AMC96281.1_1676	0.257523	0.335073	0.229841
lcl|CP014225.1_cds_AMC96282.1_1677	0.265153	0.447465	0.239526
lcl|CP014225.1_cds_AMC96283.1_1678	0.314274	0.611676	0.268438
lcl|CP014225.1_cds_AMC96284.1_1679	0.297483	0.489469	0.260825
lcl|CP014225.1_cds_AMC96285.1_1680	0.292474	0.506646	0.26267
lcl|CP014225.1_cds_AMC96286.1_1681	0.291086	0.499583	0.260271
lcl|CP014225.1_cds_AMC96287.1_1682	0.322394	0.518834	0.289514
lcl|CP014225.1_cds_AMC96288.1_1684	0.27918	0.412785	0.246799
lcl|CP014225.1_cds_AMC96289.1_1685	0.29975	0.390329	0.240325
lcl|CP014225.1_cds_AMC96290.1_1686	0.328994	0.722259	0.291301
lcl|CP014225.1_cds_AMC96291.1_1687	0.301589	0.527545	0.265109
lcl|CP014225.1_cds_AMC96292.1_1688	0.340467	0.642298	0.304788
lcl|CP014225.1_cds_AMC96293.1_1689	0.335038	0.614493	0.292102
lcl|CP014225.1_cds_AMC96294.1_1690	0.329528	0.675509	0.291395
lcl|CP014225.1_cds_AMC96295.1_1691	0.294504	0.529254	0.28048
lcl|CP014225.1_cds_AMC96296.1_1692	0.320192	0.647728	0.284718
lcl|CP014225.1_cds_AMC96297.1_1693	0.290626	0.469266	0.27552
lcl|CP014225.1_cds_AMC96298.1_1694	0.288489	0.437347	0.266262
lcl|CP014225.1_cds_AMC96299.1_1695	0.271046	0.481139	0.24321
lcl|CP014225.1_cds_AMC96300.1_1696	0.229327	0.349177	0.210934
lcl|CP014225.1_cds_AMC96301.1_1697	0.334755	0.664645	0.295288
lcl|CP014225.1_cds_AMC96302.1_1698	0.337521	0.686775	0.290913
lcl|CP014225.1_cds_AMC96303.1_1699	0.302783	0.5501	0.261554
lcl|CP014225.1_cds_AMC96304.1_1700	0.32783	0.663868	0.28145
lcl|CP014225.1_cds_AMC96305.1_1701	0.300201	0.544478	0.270287
lcl|CP014225.1_cds_AMC96306.1_1703	0.317059	0.591001	0.278251
lcl|CP014225.1_cds_AMC96307.1_1704	0.294956	0.541066	0.26477
lcl|CP014225.1_cds_AMC96308.1_1706	0.286739	0.516936	0.253411
lcl|CP014225.1_cds_AMC96309.1_1707	0.308469	0.664557	0.278086
lcl|CP014225.1_cds_AMC96310.1_1708	0.318506	0.620514	0.279145
lcl|CP014225.1_cds_AMC96311.1_1710	0.321061	0.618614	0.278318
lcl|CP014225.1_cds_AMC96312.1_1711	0.288489	0.513922	0.259265
lcl|CP014225.1_cds_AMC96313.1_1712	0.317869	0.622726	0.277896
lcl|CP014225.1_cds_AMC96314.1_1713	0.275485	0.493307	0.242156
lcl|CP014225.1_cds_AMC96315.1_1714	0.306721	0.591339	0.26991
lcl|CP014225.1_cds_AMC96316.1_1715	0.303476	0.551033	0.264913
lcl|CP014225.1_cds_AMC96317.1_1716	0.303016	0.417069	0.267022
lcl|CP014225.1_cds_AMC96318.1_1717	0.310877	0.607938	0.281079
lcl|CP014225.1_cds_AMC96319.1_1718	0.319509	0.61292	0.282758
lcl|CP014225.1_cds_AMC96320.1_1719	0.30597	0.549533	0.27158
lcl|CP014225.1_cds_AMC96321.1_1720	0.32105	0.687779	0.275742
lcl|CP014225.1_cds_AMC96322.1_1721	0.301258	0.59597	0.267336
lcl|CP014225.1_cds_AMC96323.1_1722	0.29046	0.433564	0.254978
lcl|CP014225.1_cds_AMC96324.1_1723	0.27768	0.277101	0.24317
lcl|CP014225.1_cds_AMC96325.1_1724	0.279507	0.285408	0.240825
lcl|CP014225.1_cds_AMC96326.1_1725	0.286631	0.438673	0.253253
lcl|CP014225.1_cds_AMC96327.1_1726	0.28118	0.464484	0.254395
lcl|CP014225.1_cds_AMC96328.1_1727	0.31673	0.600077	0.274126
lcl|CP014225.1_cds_AMC96329.1_1728	0.300644	0.362082	0.252849
lcl|CP014225.1_cds_AMC96330.1_1729	0.303945	0.537943	0.266615
lcl|CP014225.1_cds_AMC96331.1_1730	0.326214	0.580193	0.289657
lcl|CP014225.1_cds_AMC96332.1_1731	0.300913	0.565349	0.268109
lcl|CP014225.1_cds_AMC96333.1_1732	0.288944	0.600057	0.255838
lcl|CP014225.1_cds_AMC96334.1_1733	0.317296	0.624982	0.273968
lcl|CP014225.1_cds_AMC96335.1_1736	0.320356	0.564851	0.283289
lcl|CP014225.1_cds_AMC96336.1_1737	0.306809	0.562746	0.269325
lcl|CP014225.1_cds_AMC96337.1_1738	0.32725	0.667145	0.291706
lcl|CP014225.1_cds_AMC96338.1_1739	0.330828	0.647135	0.286565
lcl|CP014225.1_cds_AMC96339.1_1740	0.302051	0.523271	0.266502
lcl|CP014225.1_cds_AMC96340.1_1741	0.223505	0.278411	0.200392
lcl|CP014225.1_cds_AMC96341.1_1742	0.332293	0.68504	0.295721
lcl|CP014225.1_cds_AMC96342.1_1743	0.348204	0.715582	0.314639
lcl|CP014225.1_cds_AMC96343.1_1744	0.314793	0.566391	0.273856
lcl|CP014225.1_cds_AMC96344.1_1745	0.312409	0.578573	0.278588
lcl|CP014225.1_cds_AMC96345.1_1746	0.327508	0.644294	0.291129
lcl|CP014225.1_cds_AMC96346.1_1747	0.297195	0.499045	0.259669
lcl|CP014225.1_cds_AMC96347.1_1748	0.31592	0.515724	0.27566
lcl|CP014225.1_cds_AMC96348.1_1749	0.299722	0.492258	0.261043
lcl|CP014225.1_cds_AMC96349.1_1750	0.279823	0.547286	0.25378
lcl|CP014225.1_cds_AMC96350.1_1751	0.306156	0.557778	0.273322
lcl|CP014225.1_cds_AMC96351.1_1752	0.307459	0.555149	0.275541
lcl|CP014225.1_cds_AMC96352.1_1753	0.283863	0.536983	0.261645
lcl|CP014225.1_cds_AMC96353.1_1754	0.335272	0.602782	0.289007
lcl|CP014225.1_cds_AMC96354.1_1755	0.275558	0.454545	0.249466
lcl|CP014225.1_cds_AMC96355.1_1756	0.296642	0.426993	0.268038
lcl|CP014225.1_cds_AMC96356.1_1757	0.26845	0.502701	0.247903
lcl|CP014225.1_cds_AMC96357.1_1758	0.308215	0.612921	0.277316
lcl|CP014225.1_cds_AMC96358.1_1759	0.314201	0.608592	0.280154
lcl|CP014225.1_cds_AMC96359.1_1760	0.300161	0.615976	0.263504
lcl|CP014225.1_cds_AMC96360.1_1761	0.304529	0.566908	0.274855
lcl|CP014225.1_cds_AMC96361.1_1762	0.298145	0.535391	0.271462
lcl|CP014225.1_cds_AMC96362.1_1763	0.291333	0.627518	0.261507
lcl|CP014225.1_cds_AMC96363.1_1764	0.287391	0.500068	0.255287
lcl|CP014225.1_cds_AMC96364.1_1765	0.305529	0.340055	0.259356
lcl|CP014225.1_cds_AMC96365.1_1767	0.282293	0.370917	0.250819
lcl|CP014225.1_cds_AMC96366.1_1768	0.311531	0.51627	0.266716
lcl|CP014225.1_cds_AMC96367.1_1769	0.292818	0.523958	0.261574
lcl|CP014225.1_cds_AMC96368.1_1770	0.30269	0.545789	0.269292
lcl|CP014225.1_cds_AMC96369.1_1771	0.284405	0.316304	0.248941
lcl|CP014225.1_cds_AMC96370.1_1774	0.284651	0.331979	0.235126
lcl|CP014225.1_cds_AMC96371.1_1775	0.262293	0.398537	0.236217
lcl|CP014225.1_cds_AMC96372.1_1776	0.29252	0.526391	0.255687
lcl|CP014225.1_cds_AMC96373.1_1777	0.312163	0.58571	0.276706
lcl|CP014225.1_cds_AMC96374.1_1778	0.266076	0.4488	0.235279
lcl|CP014225.1_cds_AMC96375.1_1779	0.328901	0.673074	0.295878
lcl|CP014225.1_cds_AMC96376.1_1780	0.298672	0.514062	0.268227
lcl|CP014225.1_cds_AMC96377.1_1781	0.295438	0.534992	0.258289
lcl|CP014225.1_cds_AMC96378.1_1782	0.322799	0.683936	0.286427
lcl|CP014225.1_cds_AMC96379.1_1783	0.315284	0.649121	0.274645
lcl|CP014225.1_cds_AMC96380.1_1784	0.329628	0.701817	0.28737
lcl|CP014225.1_cds_AMC96381.1_1785	0.29044	0.455724	0.27475
lcl|CP014225.1_cds_AMC96382.1_1786	0.227782	0.401379	0.22228
lcl|CP014225.1_cds_AMC96383.1_1787	0.260261	0.435044	0.234764
lcl|CP014225.1_cds_AMC96384.1_1788	0.300734	0.544018	0.262539
lcl|CP014225.1_cds_AMC96385.1_1789	0.326805	0.605223	0.282252
lcl|CP014225.1_cds_AMC96386.1_1790	0.270934	0.29852	0.235926
lcl|CP014225.1_cds_AMC96387.1_1791	0.302444	0.484752	0.271948
lcl|CP014225.1_cds_AMC96388.1_1793	0.291303	0.479372	0.254114
lcl|CP014225.1_cds_AMC96389.1_1794	0.299379	0.425907	0.265255
lcl|CP014225.1_cds_AMC96390.1_1796	0.329636	0.531412	0.27988
lcl|CP014225.1_cds_AMC96391.1_1797	0.334017	0.658878	0.296884
lcl|CP014225.1_cds_AMC96392.1_1798	0.279927	0.447739	0.245104
lcl|CP014225.1_cds_AMC96393.1_1799	0.312039	0.416783	0.271521
lcl|CP014225.1_cds_AMC96394.1_1800	0.252106	0.35192	0.227895
lcl|CP014225.1_cds_AMC96395.1_1801	0.303764	0.511885	0.262473
lcl|CP014225.1_cds_AMC96396.1_1802	0.309638	0.566433	0.27375
lcl|CP014225.1_cds_AMC96397.1_1803	0.265653	0.373148	0.240808
lcl|CP014225.1_cds_AMC96398.1_1804	0.253966	0.304105	0.228977
lcl|CP014225.1_cds_AMC96399.1_1805	0.330927	0.699293	0.28991
lcl|CP014225.1_cds_AMC96400.1_1806	0.304636	0.522592	0.25877
lcl|CP014225.1_cds_AMC96401.1_1807	0.314764	0.589546	0.276322
lcl|CP014225.1_cds_AMC96402.1_1808	0.288078	0.398846	0.259222
lcl|CP014225.1_cds_AMC96403.1_1810	0.306225	0.553124	0.262779
lcl|CP014225.1_cds_AMC96404.1_1811	0.302835	0.549928	0.267273
lcl|CP014225.1_cds_AMC96405.1_1812	0.310153	0.505648	0.262718
lcl|CP014225.1_cds_AMC96406.1_1813	0.285182	0.439369	0.255081
lcl|CP014225.1_cds_AMC96407.1_1816	0.30451	0.524088	0.269387
lcl|CP014225.1_cds_AMC96408.1_1817	0.318681	0.594136	0.291127
lcl|CP014225.1_cds_AMC96409.1_1818	0.308162	0.552803	0.273796
lcl|CP014225.1_cds_AMC96410.1_1819	0.306939	0.561481	0.26961
lcl|CP014225.1_cds_AMC96411.1_1820	0.300712	0.533398	0.262855
lcl|CP014225.1_cds_AMC96412.1_1821	0.312846	0.607211	0.268957
lcl|CP014225.1_cds_AMC96413.1_1822	0.300448	0.583631	0.26478
lcl|CP014225.1_cds_AMC96414.1_1823	0.276414	0.456075	0.241605
lcl|CP014225.1_cds_AMC96415.1_1824	0.295094	0.432298	0.244117
lcl|CP014225.1_cds_AMC96416.1_1825	0.284476	0.443274	0.25255
lcl|CP014225.1_cds_AMC96417.1_1826	0.305142	0.466602	0.269749
lcl|CP014225.1_cds_AMC96418.1_1827	0.287075	0.517638	0.255391
lcl|CP014225.1_cds_AMC96419.1_1828	0.294305	0.47629	0.269961
lcl|CP014225.1_cds_AMC96420.1_1829	0.255557	0.252587	0.218201
lcl|CP014225.1_cds_AMC96421.1_1830	0.283965	0.484853	0.246631
lcl|CP014225.1_cds_AMC96422.1_1831	0.322467	0.604623	0.27919
lcl|CP014225.1_cds_AMC96423.1_1832	0.311623	0.604428	0.278255
lcl|CP014225.1_cds_AMC96424.1_1833	0.31851	0.66719	0.277725
lcl|CP014225.1_cds_AMC96425.1_1834	0.311046	0.564247	0.272271
lcl|CP014225.1_cds_AMC96426.1_1835	0.267417	0.414116	0.241506
lcl|CP014225.1_cds_AMC96427.1_1836	0.33438	0.717453	0.295946
lcl|CP014225.1_cds_AMC96428.1_1837	0.236349	0.378579	0.218268
lcl|CP014225.1_cds_AMC96429.1_1838	0.310296	0.587326	0.269173
lcl|CP014225.1_cds_AMC96430.1_1839	0.315957	0.59857	0.274747
lcl|CP014225.1_cds_AMC96431.1_1840	0.274269	0.428363	0.247589
lcl|CP014225.1_cds_AMC96432.1_1841	0.293372	0.501469	0.261319
lcl|CP014225.1_cds_AMC96433.1_1842	0.286433	0.442806	0.2466
lcl|CP014225.1_cds_AMC96434.1_1843	0.292739	0.5465	0.257041
lcl|CP014225.1_cds_AMC96435.1_1844	0.333131	0.706351	0.293751
lcl|CP014225.1_cds_AMC96436.1_1845	0.299486	0.506706	0.271492
lcl|CP014225.1_cds_AMC96437.1_1846	0.299912	0.562136	0.257015
lcl|CP014225.1_cds_AMC96438.1_1847	0.291427	0.369267	0.261668
lcl|CP014225.1_cds_AMC96439.1_1848	0.365854	0.859103	0.323413
lcl|CP014225.1_cds_AMC96440.1_1849	0.247136	0.299186	0.233837
lcl|CP014225.1_cds_AMC96441.1_1850	0.281621	0.345832	0.251149
lcl|CP014225.1_cds_AMC96442.1_1851	0.277628	0.343279	0.247789
lcl|CP014225.1_cds_AMC96443.1_1852	0.342458	0.754516	0.302124
lcl|CP014225.1_cds_AMC96444.1_1853	0.328823	0.71489	0.288408
lcl|CP014225.1_cds_AMC96445.1_1854	0.308859	0.513282	0.284137
lcl|CP014225.1_cds_AMC96446.1_1855	0.283927	0.438474	0.249706
lcl|CP014225.1_cds_AMC96447.1_1856	0.290556	0.422423	0.248477
lcl|CP014225.1_cds_AMC96448.1_1857	0.274073	0.39102	0.245283
lcl|CP014225.1_cds_AMC96449.1_1858	0.282216	0.451315	0.249284
lcl|CP014225.1_cds_AMC96450.1_1859	0.321304	0.611577	0.28564
lcl|CP014225.1_cds_AMC96451.1_1860	0.336344	0.509747	0.287994
lcl|CP014225.1_cds_AMC96452.1_1861	0.298699	0.454205	0.263374
lcl|CP014225.1_cds_AMC96453.1_1862	0.298571	0.464403	0.27118
lcl|CP014225.1_cds_AMC96454.1_1863	0.293959	0.466917	0.260345
lcl|CP014225.1_cds_AMC96455.1_1864	0.287668	0.430694	0.261966
lcl|CP014225.1_cds_AMC96456.1_1865	0.287043	0.489597	0.254523
lcl|CP014225.1_cds_AMC96457.1_1866	0.312643	0.533901	0.273838
lcl|CP014225.1_cds_AMC96458.1_1867	0.258506	0.243669	0.237037
lcl|CP014225.1_cds_AMC96459.1_1868	0.250449	0.503397	0.232121
lcl|CP014225.1_cds_AMC96460.1_1869	0.286569	0.499891	0.257219
lcl|CP014225.1_cds_AMC96461.1_1870	0.327656	0.588592	0.289432
lcl|CP014225.1_cds_AMC96462.1_1871	0.292959	0.460356	0.253123
lcl|CP014225.1_cds_AMC96463.1_1872	0.265803	0.377776	0.237373
lcl|CP014225.1_cds_AMC96464.1_1873	0.29856	0.501256	0.267099
lcl|CP014225.1_cds_AMC96465.1_1874	0.317448	0.598798	0.285051
lcl|CP014225.1_cds_AMC96466.1_1875	0.288141	0.560295	0.25672
lcl|CP014225.1_cds_AMC96467.1_1876	0.292006	0.551805	0.266888
lcl|CP014225.1_cds_AMC96468.1_1877	0.307321	0.580731	0.277164
lcl|CP014225.1_cds_AMC96469.1_1878	0.296003	0.558235	0.266124
lcl|CP014225.1_cds_AMC96470.1_1879	0.29269	0.50552	0.25106
lcl|CP014225.1_cds_AMC96471.1_1880	0.290122	0.473141	0.263751
lcl|CP014225.1_cds_AMC96472.1_1881	0.295756	0.516573	0.253875
lcl|CP014225.1_cds_AMC96473.1_1882	0.27163	0.452207	0.246597
lcl|CP014225.1_cds_AMC96474.1_1883	0.289623	0.392792	0.260551
lcl|CP014225.1_cds_AMC96475.1_1884	0.316151	0.602013	0.276351
lcl|CP014225.1_cds_AMC96476.1_1885	0.330286	0.621373	0.290383
lcl|CP014225.1_cds_AMC96477.1_1886	0.301952	0.552437	0.268473
lcl|CP014225.1_cds_AMC96478.1_1887	0.280985	0.480084	0.253991
lcl|CP014225.1_cds_AMC96479.1_1888	0.300161	0.525813	0.262188
lcl|CP014225.1_cds_AMC96480.1_1889	0.286464	0.496622	0.254664
lcl|CP014225.1_cds_AMC96481.1_1890	0.291022	0.317891	0.241106
lcl|CP014225.1_cds_AMC96482.1_1891	0.28936	0.465824	0.246914
lcl|CP014225.1_cds_AMC96483.1_1892	0.286329	0.294518	0.237002
lcl|CP014225.1_cds_AMC96484.1_1894	0.284013	0.469323	0.254562
lcl|CP014225.1_cds_AMC96485.1_1895	0.269188	0.501636	0.24747
lcl|CP014225.1_cds_AMC96486.1_1896	0.340282	0.728879	0.297666
lcl|CP014225.1_cds_AMC96487.1_1897	0.341616	0.664793	0.301886
lcl|CP014225.1_cds_AMC96488.1_1898	0.304549	0.481383	0.273301
lcl|CP014225.1_cds_AMC96489.1_1899	0.278918	0.381299	0.25184
lcl|CP014225.1_cds_AMC96490.1_1900	0.362441	0.638467	0.331016
lcl|CP014225.1_cds_AMC96491.1_1901	0.295309	0.565478	0.260361
lcl|CP014225.1_cds_AMC96492.1_1902	0.296182	0.497736	0.271921
lcl|CP014225.1_cds_AMC96493.1_1903	0.321432	0.606982	0.277211
lcl|CP014225.1_cds_AMC96494.1_1904	0.296079	0.514017	0.26115
lcl|CP014225.1_cds_AMC96495.1_1905	0.31179	0.60001	0.2712
lcl|CP014225.1_cds_AMC96496.1_1906	0.303237	0.554018	0.274658
lcl|CP014225.1_cds_AMC96497.1_1907	0.320914	0.712085	0.287633
lcl|CP014225.1_cds_AMC96498.1_1908	0.327457	0.639155	0.283576
lcl|CP014225.1_cds_AMC96499.1_1909	0.331117	0.600557	0.295029
lcl|CP014225.1_cds_AMC96500.1_1910	0.351814	0.752064	0.314317
lcl|CP014225.1_cds_AMC96501.1_1911	0.316767	0.558249	0.275341
lcl|CP014225.1_cds_AMC96502.1_1912	0.299728	0.540281	0.265487
lcl|CP014225.1_cds_AMC96503.1_1913	0.296906	0.458304	0.255938
lcl|CP014225.1_cds_AMC96504.1_1914	0.33175	0.686668	0.287756
lcl|CP014225.1_cds_AMC96505.1_1915	0.327218	0.678228	0.289137
lcl|CP014225.1_cds_AMC96506.1_1916	0.288455	0.350723	0.256437
lcl|CP014225.1_cds_AMC96507.1_1917	0.344741	0.737831	0.302294
lcl|CP014225.1_cds_AMC96508.1_1918	0.29615	0.522592	0.261614
lcl|CP014225.1_cds_AMC96509.1_1919	0.280603	0.426926	0.251795
lcl|CP014225.1_cds_AMC96510.1_1920	0.261331	0.244536	0.229595
lcl|CP014225.1_cds_AMC96511.1_1921	0.267024	0.296677	0.237547
lcl|CP014225.1_cds_AMC96512.1_1922	0.292341	0.369875	0.250408
lcl|CP014225.1_cds_AMC96513.1_1923	0.315204	0.405786	0.26566
lcl|CP014225.1_cds_AMC96514.1_1924	0.276852	0.332092	0.243467
lcl|CP014225.1_cds_AMC96515.1_1925	0.284024	0.381088	0.242391
lcl|CP014225.1_cds_AMC96516.1_1926	0.290407	0.417302	0.25757
lcl|CP014225.1_cds_AMC96517.1_1927	0.299525	0.290126	0.252262
lcl|CP014225.1_cds_AMC96518.1_1928	0.291291	0.362188	0.260023
lcl|CP014225.1_cds_AMC96519.1_1929	0.276007	0.415755	0.244936
lcl|CP014225.1_cds_AMC96520.1_1930	0.280408	0.397578	0.246063
lcl|CP014225.1_cds_AMC96521.1_1931	0.297162	0.514807	0.262121
lcl|CP014225.1_cds_AMC96522.1_1932	0.308346	0.591387	0.2735
lcl|CP014225.1_cds_AMC96523.1_1933	0.281772	0.487655	0.249869
lcl|CP014225.1_cds_AMC96524.1_1934	0.368617	0.765728	0.31545
lcl|CP014225.1_cds_AMC96525.1_1935	0.341867	0.721778	0.308058
lcl|CP014225.1_cds_AMC96526.1_1936	0.285532	0.392187	0.26331
lcl|CP014225.1_cds_AMC96527.1_1937	0.297256	0.498458	0.267954
lcl|CP014225.1_cds_AMC96528.1_1938	0.320058	0.609227	0.277475
lcl|CP014225.1_cds_AMC96529.1_1939	0.332281	0.578119	0.294949
lcl|CP014225.1_cds_AMC96530.1_1940	0.319203	0.60127	0.279436
lcl|CP014225.1_cds_AMC96531.1_1941	0.329919	0.60477	0.290535
lcl|CP014225.1_cds_AMC96532.1_1942	0.344558	0.646758	0.306954
lcl|CP014225.1_cds_AMC96533.1_1943	0.294818	0.397958	0.263836
lcl|CP014225.1_cds_AMC96534.1_1944	0.292126	0.524191	0.262388
lcl|CP014225.1_cds_AMC96535.1_1945	0.285859	0.450608	0.249816
lcl|CP014225.1_cds_AMC96536.1_1946	0.299635	0.551713	0.259419
lcl|CP014225.1_cds_AMC96537.1_1947	0.374451	0.699527	0.33093
lcl|CP014225.1_cds_AMC96538.1_1948	0.316049	0.603515	0.278545
lcl|CP014225.1_cds_AMC96539.1_1949	0.314164	0.566732	0.282679
lcl|CP014225.1_cds_AMC96540.1_1950	0.31007	0.552606	0.275289
lcl|CP014225.1_cds_AMC96541.1_1951	0.315263	0.554814	0.271377
lcl|CP014225.1_cds_AMC96542.1_1952	0.315206	0.609733	0.278731
lcl|CP014225.1_cds_AMC96543.1_1953	0.288821	0.505152	0.252648
lcl|CP014225.1_cds_AMC96544.1_1954	0.303581	0.571428	0.264437
lcl|CP014225.1_cds_AMC96545.1_1955	0.309029	0.530096	0.27256
lcl|CP014225.1_cds_AMC96546.1_1956	0.267412	0.395316	0.229829
lcl|CP014225.1_cds_AMC96547.1_1957	0.280963	0.366231	0.25773
lcl|CP014225.1_cds_AMC96548.1_1958	0.27291	0.394313	0.237478
lcl|CP014225.1_cds_AMC96549.1_1959	0.291831	0.441262	0.256975
lcl|CP014225.1_cds_AMC96550.1_1960	0.270282	0.497616	0.244454
lcl|CP014225.1_cds_AMC96551.1_1961	0.296374	0.424624	0.261567
lcl|CP014225.1_cds_AMC96552.1_1963	0.287557	0.44858	0.250508
lcl|CP014225.1_cds_AMC96553.1_1964	0.285313	0.451981	0.251733
lcl|CP014225.1_cds_AMC96554.1_1965	0.291872	0.523798	0.258075
lcl|CP014225.1_cds_AMC96555.1_1966	0.328308	0.653885	0.290458
lcl|CP014225.1_cds_AMC96556.1_1967	0.287232	0.491608	0.252138
lcl|CP014225.1_cds_AMC96557.1_1968	0.279004	0.477759	0.244924
lcl|CP014225.1_cds_AMC96558.1_1969	0.309199	0.579428	0.279609
lcl|CP014225.1_cds_AMC96559.1_1970	0.313912	0.591677	0.284964
lcl|CP014225.1_cds_AMC96560.1_1971	0.305257	0.598492	0.272017
lcl|CP014225.1_cds_AMC96561.1_1972	0.271846	0.442641	0.248454
lcl|CP014225.1_cds_AMC96562.1_1973	0.276657	0.354341	0.2423
lcl|CP014225.1_cds_AMC96563.1_1974	0.269395	0.373056	0.237076
lcl|CP014225.1_cds_AMC96564.1_1975	0.33573	0.553668	0.305224
lcl|CP014225.1_cds_AMC96565.1_1976	0.29605	0.467495	0.259409
lcl|CP014225.1_cds_AMC96566.1_1977	0.277176	0.461796	0.254264
lcl|CP014225.1_cds_AMC96567.1_1978	0.281956	0.441535	0.254399
lcl|CP014225.1_cds_AMC96568.1_1979	0.280808	0.396797	0.255347
lcl|CP014225.1_cds_AMC96569.1_1980	0.306905	0.486086	0.2752
lcl|CP014225.1_cds_AMC96570.1_1981	0.295893	0.54787	0.263861
lcl|CP014225.1_cds_AMC96571.1_1982	0.298907	0.549092	0.263964
lcl|CP014225.1_cds_AMC96572.1_1983	0.281768	0.412763	0.248638
lcl|CP014225.1_cds_AMC96573.1_1984	0.322172	0.593736	0.290237
lcl|CP014225.1_cds_AMC96574.1_1985	0.314635	0.579893	0.281011
lcl|CP014225.1_cds_AMC96575.1_1986	0.303954	0.558365	0.268069
lcl|CP014225.1_cds_AMC96576.1_1987	0.288735	0.442077	0.258831
lcl|CP014225.1_cds_AMC96577.1_1988	0.305621	0.514691	0.264258
lcl|CP014225.1_cds_AMC96578.1_1989	0.319423	0.57797	0.28477
lcl|CP014225.1_cds_AMC96579.1_1990	0.338092	0.65814	0.296059
lcl|CP014225.1_cds_AMC96580.1_1991	0.274028	0.41821	0.246617
lcl|CP014225.1_cds_AMC96581.1_1992	0.27235	0.522492	0.242517
lcl|CP014225.1_cds_AMC96582.1_1994	0.315541	0.614709	0.269762
lcl|CP014225.1_cds_AMC96583.1_1995	0.319877	0.627008	0.281847
lcl|CP014225.1_cds_AMC96584.1_1996	0.284088	0.521464	0.258516
lcl|CP014225.1_cds_AMC96585.1_1997	0.273967	0.44655	0.249314
lcl|CP014225.1_cds_AMC96586.1_1998	0.294341	0.529774	0.263753
lcl|CP014225.1_cds_AMC96587.1_1999	0.292456	0.423844	0.256595
lcl|CP014225.1_cds_AMC96588.1_2000	0.330343	0.65809	0.288604
lcl|CP014225.1_cds_AMC96589.1_2001	0.290526	0.45566	0.257733
lcl|CP014225.1_cds_AMC96590.1_2002	0.25435	0.248552	0.227906
lcl|CP014225.1_cds_AMC96591.1_2003	0.343432	0.755612	0.304457
lcl|CP014225.1_cds_AMC96592.1_2004	0.278746	0.456576	0.24978
lcl|CP014225.1_cds_AMC96593.1_2005	0.321365	0.650275	0.284376
lcl|CP014225.1_cds_AMC96594.1_2006	0.304754	0.553613	0.271332
lcl|CP014225.1_cds_AMC96595.1_2007	0.382521	0.731493	0.337249
lcl|CP014225.1_cds_AMC96596.1_2008	0.276979	0.411722	0.249356
lcl|CP014225.1_cds_AMC96597.1_2009	0.227373	0.301148	0.210124
lcl|CP014225.1_cds_AMC96598.1_2010	0.337778	0.731485	0.292823
lcl|CP014225.1_cds_AMC96599.1_2011	0.309802	0.565864	0.279755
lcl|CP014225.1_cds_AMC96600.1_2013	0.334494	0.685083	0.29749
lcl|CP014225.1_cds_AMC96601.1_2014	0.281933	0.488992	0.241255
lcl|CP014225.1_cds_AMC96602.1_2015	0.272006	0.464153	0.24517
lcl|CP014225.1_cds_AMC96603.1_2016	0.287169	0.497555	0.25782
lcl|CP014225.1_cds_AMC96604.1_2017	0.274289	0.451466	0.248009
lcl|CP014225.1_cds_AMC96605.1_2018	0.327371	0.608851	0.273894
lcl|CP014225.1_cds_AMC96606.1_2019	0.322607	0.646954	0.280834
lcl|CP014225.1_cds_AMC96607.1_2020	0.314586	0.589152	0.282528
lcl|CP014225.1_cds_AMC96608.1_2021	0.26115	0.350824	0.239808
lcl|CP014225.1_cds_AMC96609.1_2022	0.283179	0.484277	0.243018
lcl|CP014225.1_cds_AMC96610.1_2023	0.314595	0.552608	0.275031
lcl|CP014225.1_cds_AMC96611.1_2024	0.31301	0.540648	0.26841
lcl|CP014225.1_cds_AMC96612.1_2025	0.322667	0.570728	0.275735
lcl|CP014225.1_cds_AMC96613.1_2026	0.294989	0.476562	0.261013
lcl|CP014225.1_cds_AMC96614.1_2027	0.284406	0.47552	0.248148
lcl|CP014225.1_cds_AMC96615.1_2028	0.287288	0.388636	0.257632
lcl|CP014225.1_cds_AMC96616.1_2029	0.343051	0.70762	0.311956
lcl|CP014225.1_cds_AMC96617.1_2030	0.336331	0.707538	0.299767
[truncated: 2,490 more rows]

## Sheet: Neisseria meningitidis
gene id	gtAI	CAI	StAI
lcl|NC_003116.1_cds_102	0.171096	0.263016	0.283146
lcl|NC_003116.1_cds_1020	0.254915	0.461724	0.319209
lcl|NC_003116.1_cds_1022	0.22277	0.332809	0.291709
lcl|NC_003116.1_cds_1023	0.170199	0.280372	0.26476
lcl|NC_003116.1_cds_1024	0.250659	0.380259	0.317217
lcl|NC_003116.1_cds_1040	0.24646	0.541759	0.312441
lcl|NC_003116.1_cds_1050	0.215501	0.377257	0.287793
lcl|NC_003116.1_cds_1063	0.183845	0.302059	0.295818
lcl|NC_003116.1_cds_1070	0.239517	0.354093	0.331361
lcl|NC_003116.1_cds_1083	0.245678	0.575917	0.320495
lcl|NC_003116.1_cds_1102	0.203517	0.23796	0.30044
lcl|NC_003116.1_cds_1106	0.17362	0.237618	0.267389
lcl|NC_003116.1_cds_1140	0.271012	0.631563	0.314781
lcl|NC_003116.1_cds_1141	0.288708	0.498579	0.360798
lcl|NC_003116.1_cds_1186	0.183019	0.276256	0.299129
lcl|NC_003116.1_cds_1194	0.200638	0.242888	0.28129
lcl|NC_003116.1_cds_1200	0.182371	0.389923	0.274308
lcl|NC_003116.1_cds_1209	0.183976	0.189733	0.25981
lcl|NC_003116.1_cds_1218	0.196397	0.326881	0.302273
lcl|NC_003116.1_cds_1252	0.20267	0.330717	0.288099
lcl|NC_003116.1_cds_1253	0.164855	0.346073	0.2793
lcl|NC_003116.1_cds_1260	0.172414	0.292336	0.289747
lcl|NC_003116.1_cds_1268	0.188065	0.321175	0.268914
lcl|NC_003116.1_cds_1269	0.203461	0.265847	0.285698
lcl|NC_003116.1_cds_1275	0.255845	0.490273	0.330015
lcl|NC_003116.1_cds_1279	0.236265	0.382756	0.310819
lcl|NC_003116.1_cds_1297	0.270063	0.330866	0.314482
lcl|NC_003116.1_cds_1299	0.237222	0.328621	0.278467
lcl|NC_003116.1_cds_1300	0.19745	0.332338	0.278082
lcl|NC_003116.1_cds_1309	0.215628	0.286375	0.29264
lcl|NC_003116.1_cds_1313	0.248514	0.302624	0.311221
lcl|NC_003116.1_cds_1314	0.20139	0.362757	0.289339
lcl|NC_003116.1_cds_1315	0.257027	0.499769	0.310495
lcl|NC_003116.1_cds_1316	0.188754	0.327737	0.268818
lcl|NC_003116.1_cds_1330	0.273105	0.459059	0.338252
lcl|NC_003116.1_cds_1335	0.178956	0.311844	0.26649
lcl|NC_003116.1_cds_1337	0.262165	0.542815	0.312025
lcl|NC_003116.1_cds_1338	0.173484	0.309491	0.27105
lcl|NC_003116.1_cds_1339	0.24881	0.315994	0.302664
lcl|NC_003116.1_cds_1340	0.240472	0.502909	0.28913
lcl|NC_003116.1_cds_1352	0.22276	0.310197	0.292788
lcl|NC_003116.1_cds_1355	0.221823	0.454478	0.280785
lcl|NC_003116.1_cds_1356	0.180175	0.327983	0.28821
lcl|NC_003116.1_cds_1358	0.193867	0.269805	0.302014
lcl|NC_003116.1_cds_1360	0.219446	0.324801	0.300714
lcl|NC_003116.1_cds_1375	0.207206	0.446311	0.299605
lcl|NC_003116.1_cds_1382	0.194495	0.275166	0.288463
lcl|NC_003116.1_cds_1410	0.194566	0.336364	0.290577
lcl|NC_003116.1_cds_1418	0.264337	0.47355	0.351873
lcl|NC_003116.1_cds_1427	0.209994	0.293237	0.285395
lcl|NC_003116.1_cds_1432	0.237372	0.432588	0.318837
lcl|NC_003116.1_cds_1476	0.145479	0.325132	0.283028
lcl|NC_003116.1_cds_1486	0.190058	0.30896	0.288988
lcl|NC_003116.1_cds_1492	0.230904	0.445424	0.304224
lcl|NC_003116.1_cds_1512	0.220467	0.327622	0.295757
lcl|NC_003116.1_cds_1515	0.239198	0.391978	0.317525
lcl|NC_003116.1_cds_1522	0.206159	0.299744	0.282381
lcl|NC_003116.1_cds_1524	0.214909	0.390689	0.298086
lcl|NC_003116.1_cds_1525	0.222343	0.352937	0.280134
lcl|NC_003116.1_cds_1550	0.187782	0.226445	0.266356
lcl|NC_003116.1_cds_1570	0.229928	0.383279	0.307921
lcl|NC_003116.1_cds_1581	0.183144	0.260599	0.281531
lcl|NC_003116.1_cds_1602	0.175752	0.34549	0.279617
lcl|NC_003116.1_cds_1606	0.190346	0.35345	0.292855
lcl|NC_003116.1_cds_1625	0.240974	0.398274	0.324258
lcl|NC_003116.1_cds_1662	0.206684	0.259727	0.276665
lcl|NC_003116.1_cds_1676	0.199454	0.255058	0.263781
lcl|NC_003116.1_cds_1681	0.21716	0.357265	0.289665
lcl|NC_003116.1_cds_1686	0.20615	0.34642	0.313251
lcl|NC_003116.1_cds_1695	0.222098	0.314517	0.303946
lcl|NC_003116.1_cds_1713	0.156107	0.295984	0.25972
lcl|NC_003116.1_cds_1718	0.204993	0.306719	0.265457
lcl|NC_003116.1_cds_1719	0.196444	0.269722	0.281991
lcl|NC_003116.1_cds_1723	0.185387	0.423755	0.28405
lcl|NC_003116.1_cds_1724	0.221366	0.350469	0.277797
lcl|NC_003116.1_cds_1726	0.175561	0.249525	0.278404
lcl|NC_003116.1_cds_1730	0.225438	0.374365	0.320834
lcl|NC_003116.1_cds_1739	0.238775	0.400917	0.318142
lcl|NC_003116.1_cds_1743	0.18092	0.27414	0.28338
lcl|NC_003116.1_cds_1745	0.206978	0.389396	0.284349
lcl|NC_003116.1_cds_1746	0.262607	0.541193	0.323832
lcl|NC_003116.1_cds_175	0.217835	0.304758	0.3259
lcl|NC_003116.1_cds_1759	0.220333	0.278838	0.299968
lcl|NC_003116.1_cds_1776	0.254315	0.488637	0.329081
lcl|NC_003116.1_cds_1781	0.248377	0.464058	0.320248
lcl|NC_003116.1_cds_1789	0.194755	0.34236	0.297818
lcl|NC_003116.1_cds_179	0.197428	0.319429	0.311241
lcl|NC_003116.1_cds_1793	0.248503	0.41566	0.325509
lcl|NC_003116.1_cds_1794	0.163242	0.396244	0.270744
lcl|NC_003116.1_cds_1795	0.231904	0.391142	0.304669
lcl|NC_003116.1_cds_1797	0.207745	0.279745	0.285549
lcl|NC_003116.1_cds_181	0.238152	0.324079	0.317703
lcl|NC_003116.1_cds_1810	0.215793	0.377085	0.280715
lcl|NC_003116.1_cds_1821	0.160826	0.248779	0.264066
lcl|NC_003116.1_cds_1825	0.211236	0.329141	0.274262
lcl|NC_003116.1_cds_1828	0.17617	0.332789	0.282048
lcl|NC_003116.1_cds_1835	0.185328	0.320931	0.300337
lcl|NC_003116.1_cds_1841	0.19396	0.336337	0.271699
lcl|NC_003116.1_cds_1843	0.212954	0.418755	0.284704
lcl|NC_003116.1_cds_1859	0.178981	0.324491	0.27143
lcl|NC_003116.1_cds_1878	0.256865	0.498423	0.310116
lcl|NC_003116.1_cds_1883	0.19185	0.346699	0.29101
lcl|NC_003116.1_cds_1887	0.18416	0.354372	0.275092
lcl|NC_003116.1_cds_1892	0.185207	0.30081	0.270217
lcl|NC_003116.1_cds_1893	0.184538	0.333931	0.287268
lcl|NC_003116.1_cds_1894	0.219086	0.461614	0.280944
lcl|NC_003116.1_cds_1900	0.19492	0.286463	0.271896
lcl|NC_003116.1_cds_1923	0.198657	0.230043	0.281469
lcl|NC_003116.1_cds_193	0.243561	0.428233	0.33544
lcl|NC_003116.1_cds_1932	0.221363	0.351318	0.279632
lcl|NC_003116.1_cds_1933	0.202264	0.353533	0.295131
lcl|NC_003116.1_cds_1938	0.200974	0.385227	0.305627
lcl|NC_003116.1_cds_1939	0.168642	0.377154	0.256139
lcl|NC_003116.1_cds_194	0.208511	0.31085	0.309468
lcl|NC_003116.1_cds_1956	0.175298	0.31497	0.271902
lcl|NC_003116.1_cds_1963	0.175702	0.314745	0.271625
lcl|NC_003116.1_cds_1998	0.262044	0.414372	0.338548
lcl|NC_003116.1_cds_2048	0.202467	0.285574	0.282324
lcl|NC_003116.1_cds_2049	0.226079	0.334751	0.290848
lcl|NC_003116.1_cds_2056	0.184808	0.325293	0.285046
lcl|NC_003116.1_cds_2071	0.196765	0.316206	0.309615
lcl|NC_003116.1_cds_2080	0.199914	0.311131	0.30067
lcl|NC_003116.1_cds_2091	0.221872	0.364324	0.304194
lcl|NC_003116.1_cds_2098	0.218673	0.372154	0.319212
lcl|NC_003116.1_cds_211	0.182774	0.27948	0.298962
lcl|NC_003116.1_cds_212	0.241147	0.313936	0.333618
lcl|NC_003116.1_cds_2120	0.232531	0.368219	0.314195
lcl|NC_003116.1_cds_2157	0.210605	0.442716	0.307999
lcl|NC_003116.1_cds_2159	0.24809	0.287451	0.308056
lcl|NC_003116.1_cds_2164	0.210329	0.321796	0.286582
lcl|NC_003116.1_cds_2165	0.205585	0.333675	0.296067
lcl|NC_003116.1_cds_2195	0.193015	0.237073	0.268266
lcl|NC_003116.1_cds_2199	0.286061	0.513062	0.305661
lcl|NC_003116.1_cds_2200	0.193371	0.335211	0.277759
lcl|NC_003116.1_cds_2206	0.166857	0.327246	0.264766
lcl|NC_003116.1_cds_2212	0.174069	0.173639	0.253372
lcl|NC_003116.1_cds_223	0.196908	0.430095	0.257626
lcl|NC_003116.1_cds_2257	0.181425	0.283663	0.27713
lcl|NC_003116.1_cds_226	0.191359	0.342485	0.285767
lcl|NC_003116.1_cds_2264	0.209904	0.421921	0.291505
lcl|NC_003116.1_cds_2275	0.220669	0.34005	0.290543
lcl|NC_003116.1_cds_2276	0.24094	0.408725	0.326233
lcl|NC_003116.1_cds_2277	0.175854	0.230024	0.289166
lcl|NC_003116.1_cds_2281	0.171989	0.29247	0.260162
lcl|NC_003116.1_cds_2289	0.201099	0.254929	0.28773
lcl|NC_003116.1_cds_2299	0.233228	0.385872	0.296461
lcl|NC_003116.1_cds_2305	0.249859	0.378252	0.327539
lcl|NC_003116.1_cds_2313	0.198138	0.270529	0.294241
lcl|NC_003116.1_cds_2316	0.235956	0.273259	0.309134
lcl|NC_003116.1_cds_2327	0.196194	0.325507	0.301963
lcl|NC_003116.1_cds_2354	0.207479	0.340497	0.275519
lcl|NC_003116.1_cds_236	0.249988	0.480561	0.304581
lcl|NC_003116.1_cds_237	0.185992	0.32248	0.30037
lcl|NC_003116.1_cds_2380	0.184075	0.28613	0.279775
lcl|NC_003116.1_cds_2385	0.168714	0.316931	0.26923
lcl|NC_003116.1_cds_2390	0.180466	0.289181	0.286587
lcl|NC_003116.1_cds_2391	0.177507	0.25134	0.277885
lcl|NC_003116.1_cds_2395	0.182774	0.27948	0.298962
lcl|NC_003116.1_cds_2406	0.220925	0.477347	0.289059
lcl|NC_003116.1_cds_2413	0.201942	0.324483	0.28207
lcl|NC_003116.1_cds_2418	0.204405	0.335286	0.297916
lcl|NC_003116.1_cds_255	0.212363	0.334936	0.301409
lcl|NC_003116.1_cds_276	0.185136	0.254515	0.283421
lcl|NC_003116.1_cds_278	0.199441	0.320637	0.28623
lcl|NC_003116.1_cds_282	0.251867	0.536714	0.300214
lcl|NC_003116.1_cds_285	0.194522	0.348285	0.292998
lcl|NC_003116.1_cds_293	0.193875	0.237251	0.288069
lcl|NC_003116.1_cds_305	0.209127	0.293868	0.269673
lcl|NC_003116.1_cds_309	0.202857	0.328288	0.280244
lcl|NC_003116.1_cds_311	0.213654	0.247481	0.278753
lcl|NC_003116.1_cds_319	0.176131	0.314163	0.284317
lcl|NC_003116.1_cds_323	0.191651	0.314816	0.275421
lcl|NC_003116.1_cds_324	0.191893	0.345731	0.314457
lcl|NC_003116.1_cds_331	0.207506	0.321902	0.303061
lcl|NC_003116.1_cds_361	0.250923	0.591598	0.298866
lcl|NC_003116.1_cds_362	0.196786	0.315625	0.308518
lcl|NC_003116.1_cds_363	0.225878	0.347564	0.31624
lcl|NC_003116.1_cds_373	0.188925	0.330664	0.303335
lcl|NC_003116.1_cds_385	0.254882	0.53036	0.330709
lcl|NC_003116.1_cds_391	0.205794	0.346881	0.267694
lcl|NC_003116.1_cds_411	0.190098	0.236956	0.291287
lcl|NC_003116.1_cds_417	0.180674	0.329586	0.294729
lcl|NC_003116.1_cds_421	0.222306	0.33303	0.288717
lcl|NC_003116.1_cds_422	0.228201	0.362626	0.288612
lcl|NC_003116.1_cds_433	0.194169	0.257935	0.283424
lcl|NC_003116.1_cds_46	0.171207	0.305223	0.26895
lcl|NC_003116.1_cds_475	0.277396	0.52529	0.327812
lcl|NC_003116.1_cds_489	0.240291	0.487713	0.287502
lcl|NC_003116.1_cds_499	0.179375	0.257553	0.280466
lcl|NC_003116.1_cds_509	0.150309	0.244219	0.250618
lcl|NC_003116.1_cds_521	0.255538	0.609777	0.327522
lcl|NC_003116.1_cds_539	0.251651	0.484287	0.304763
lcl|NC_003116.1_cds_550	0.160934	0.34497	0.258769
lcl|NC_003116.1_cds_560	0.257472	0.310948	0.317834
lcl|NC_003116.1_cds_562	0.220791	0.547444	0.295816
lcl|NC_003116.1_cds_563	0.181441	0.372551	0.275177
lcl|NC_003116.1_cds_564	0.262012	0.538285	0.316144
lcl|NC_003116.1_cds_565	0.239284	0.407696	0.296854
lcl|NC_003116.1_cds_566	0.204503	0.21797	0.290687
lcl|NC_003116.1_cds_568	0.238931	0.429317	0.30302
lcl|NC_003116.1_cds_569	0.167431	0.327259	0.274584
lcl|NC_003116.1_cds_577	0.230242	0.431371	0.308973
lcl|NC_003116.1_cds_58	0.202556	0.258364	0.288072
lcl|NC_003116.1_cds_590	0.164468	0.31608	0.276141
lcl|NC_003116.1_cds_593	0.175734	0.306685	0.274614
lcl|NC_003116.1_cds_594	0.183547	0.259912	0.283899
lcl|NC_003116.1_cds_595	0.203098	0.355548	0.294282
lcl|NC_003116.1_cds_600	0.248852	0.460513	0.330872
lcl|NC_003116.1_cds_612	0.224218	0.305166	0.314575
lcl|NC_003116.1_cds_633	0.215065	0.415617	0.304912
lcl|NC_003116.1_cds_641	0.199814	0.294563	0.286848
lcl|NC_003116.1_cds_649	0.194577	0.324177	0.2551
lcl|NC_003116.1_cds_651	0.192589	0.298523	0.265924
lcl|NC_003116.1_cds_656	0.237388	0.306529	0.310091
lcl|NC_003116.1_cds_657	0.194439	0.281294	0.262604
lcl|NC_003116.1_cds_659	0.202857	0.323698	0.280244
lcl|NC_003116.1_cds_662	0.19778	0.353492	0.260607
lcl|NC_003116.1_cds_672	0.228733	0.499544	0.308877
lcl|NC_003116.1_cds_677	0.189431	0.313472	0.258925
lcl|NC_003116.1_cds_682	0.184279	0.314712	0.263834
lcl|NC_003116.1_cds_683	0.248751	0.500052	0.314197
lcl|NC_003116.1_cds_684	0.247576	0.496319	0.294229
lcl|NC_003116.1_cds_690	0.223233	0.283473	0.303939
lcl|NC_003116.1_cds_700	0.241994	0.400934	0.298432
lcl|NC_003116.1_cds_726	0.198239	0.317498	0.311725
lcl|NC_003116.1_cds_730	0.22779	0.452272	0.329257
lcl|NC_003116.1_cds_758	0.217327	0.310286	0.329428
lcl|NC_003116.1_cds_760	0.185695	0.301162	0.268946
lcl|NC_003116.1_cds_767	0.193092	0.259163	0.261818
lcl|NC_003116.1_cds_778	0.213672	0.345905	0.307151
lcl|NC_003116.1_cds_78	0.206384	0.291082	0.269584
lcl|NC_003116.1_cds_802	0.263312	0.542313	0.317584
lcl|NC_003116.1_cds_803	0.17634	0.342651	0.280409
lcl|NC_003116.1_cds_826	0.187522	0.312769	0.289543
lcl|NC_003116.1_cds_830	0.166761	0.365551	0.267751
lcl|NC_003116.1_cds_838	0.174471	0.247411	0.277937
lcl|NC_003116.1_cds_854	0.225908	0.365706	0.322389
lcl|NC_003116.1_cds_885	0.194307	0.332422	0.273367
lcl|NC_003116.1_cds_886	0.237155	0.466739	0.312144
lcl|NC_003116.1_cds_890	0.176222	0.349469	0.284608
lcl|NC_003116.1_cds_894	0.17852	0.316057	0.297725
lcl|NC_003116.1_cds_904	0.294619	0.641761	0.340019
lcl|NC_003116.1_cds_910	0.198175	0.290516	0.293306
lcl|NC_003116.1_cds_911	0.236404	0.436823	0.313562
lcl|NC_003116.1_cds_928	0.238481	0.308527	0.317258
lcl|NC_003116.1_cds_929	0.25718	0.399589	0.295377
lcl|NC_003116.1_cds_938	0.188732	0.323342	0.299024
lcl|NC_003116.1_cds_943	0.261207	0.482648	0.334357
lcl|NC_003116.1_cds_958	0.164144	0.265261	0.265438
lcl|NC_003116.1_cds_974	0.209739	0.272822	0.282512
lcl|NC_003116.1_cds_976	0.174574	0.482372	0.275157
lcl|NC_003116.1_cds_988	0.188589	0.300727	0.261955
lcl|NC_003116.1_cds_993	0.218049	0.387262	0.318596
lcl|NC_003116.1_cds_WP_000695010.1_2319	0.18368	0.312674	0.306444
lcl|NC_003116.1_cds_WP_000965859.1_511	0.193345	0.264497	0.305294
lcl|NC_003116.1_cds_WP_001148016.1_2334	0.260012	0.547037	0.335471
lcl|NC_003116.1_cds_WP_002212267.1_2387	0.241358	0.44712	0.323131
lcl|NC_003116.1_cds_WP_002212270.1_2383	0.227749	0.51741	0.31449
lcl|NC_003116.1_cds_WP_002212272.1_2382	0.282179	0.543532	0.345936
lcl|NC_003116.1_cds_WP_002212277.1_2379	0.240865	0.427239	0.328519
lcl|NC_003116.1_cds_WP_002212306.1_2367	0.263832	0.592688	0.341046
lcl|NC_003116.1_cds_WP_002212328.1_2365	0.309015	0.616636	0.359862
lcl|NC_003116.1_cds_WP_002212333.1_2359	0.286484	0.49836	0.348253
lcl|NC_003116.1_cds_WP_002212347.1_2345	0.215223	0.45633	0.312376
lcl|NC_003116.1_cds_WP_002212349.1_2343	0.258773	0.553078	0.339929
lcl|NC_003116.1_cds_WP_002212350.1_2342	0.270156	0.541269	0.352122
lcl|NC_003116.1_cds_WP_002212449.1_2306	0.243372	0.498323	0.321892
lcl|NC_003116.1_cds_WP_002212452.1_2303	0.245018	0.509556	0.319154
lcl|NC_003116.1_cds_WP_002212454.1_2301	0.169158	0.347658	0.281974
lcl|NC_003116.1_cds_WP_002212457.1_2296	0.217532	0.397308	0.322389
lcl|NC_003116.1_cds_WP_002212490.1_2254	0.255705	0.606514	0.307944
lcl|NC_003116.1_cds_WP_002212501.1_2244	0.265692	0.480646	0.345635
lcl|NC_003116.1_cds_WP_002212502.1_2243	0.190307	0.305174	0.277356
lcl|NC_003116.1_cds_WP_002212510.1_2236	0.265186	0.548219	0.326218
lcl|NC_003116.1_cds_WP_002212521.1_1960	0.234641	0.343191	0.322439
lcl|NC_003116.1_cds_WP_002212523.1_1959	0.238933	0.34808	0.328255
lcl|NC_003116.1_cds_WP_002212536.1_2222	0.263438	0.562433	0.325198
lcl|NC_003116.1_cds_WP_002212539.1_2219	0.193542	0.259009	0.303465
lcl|NC_003116.1_cds_WP_002212556.1_2191	0.317516	0.582353	0.376053
lcl|NC_003116.1_cds_WP_002212560.1_2189	0.227114	0.453243	0.311436
lcl|NC_003116.1_cds_WP_002212572.1_2177	0.219943	0.388158	0.313227
lcl|NC_003116.1_cds_WP_002212573.1_2176	0.205414	0.351549	0.30031
lcl|NC_003116.1_cds_WP_002212574.1_2175	0.238366	0.44011	0.322418
lcl|NC_003116.1_cds_WP_002212575.1_2174	0.221139	0.31972	0.314566
lcl|NC_003116.1_cds_WP_002212588.1_2154	0.211063	0.321168	0.310918
lcl|NC_003116.1_cds_WP_002212592.1_2148	0.249253	0.47686	0.339099
lcl|NC_003116.1_cds_WP_002212595.1_2145	0.238617	0.508124	0.314528
lcl|NC_003116.1_cds_WP_002212597.1_2143	0.248384	0.435936	0.325217
lcl|NC_003116.1_cds_WP_002212617.1_2125	0.207741	0.399327	0.297975
lcl|NC_003116.1_cds_WP_002212642.1_2104	0.293949	0.685482	0.340138
lcl|NC_003116.1_cds_WP_002212643.1_2103	0.236874	0.439814	0.325349
lcl|NC_003116.1_cds_WP_002212645.1_2101	0.272963	0.516903	0.361152
lcl|NC_003116.1_cds_WP_002212665.1_2084	0.23554	0.430537	0.311361
lcl|NC_003116.1_cds_WP_002212678.1_2068	0.24004	0.398894	0.306297
lcl|NC_003116.1_cds_WP_002212681.1_2066	0.301999	0.630884	0.369733
lcl|NC_003116.1_cds_WP_002212686.1_2061	0.175351	0.320429	0.27955
lcl|NC_003116.1_cds_WP_002212693.1_2054	0.231699	0.406856	0.324886
lcl|NC_003116.1_cds_WP_002212701.1_2044	0.259737	0.510411	0.319016
lcl|NC_003116.1_cds_WP_002212702.1_2043	0.216787	0.303789	0.309972
lcl|NC_003116.1_cds_WP_002212704.1_2041	0.250077	0.384928	0.335158
lcl|NC_003116.1_cds_WP_002212705.1_2040	0.228439	0.390998	0.324722
lcl|NC_003116.1_cds_WP_002212706.1_2039	0.22634	0.307276	0.320182
lcl|NC_003116.1_cds_WP_002212711.1_2035	0.250816	0.363415	0.314288
lcl|NC_003116.1_cds_WP_002212713.1_2033	0.256866	0.499852	0.333981
lcl|NC_003116.1_cds_WP_002212714.1_2032	0.208075	0.301406	0.303503
lcl|NC_003116.1_cds_WP_002212715.1_2031	0.279745	0.372108	0.368858
lcl|NC_003116.1_cds_WP_002212716.1_2030	0.26897	0.515072	0.331936
lcl|NC_003116.1_cds_WP_002212717.1_2029	0.265981	0.432279	0.342731
lcl|NC_003116.1_cds_WP_002212721.1_2017	0.275833	0.453067	0.342228
lcl|NC_003116.1_cds_WP_002212722.1_2016	0.292136	0.455699	0.366389
lcl|NC_003116.1_cds_WP_002212724.1_2014	0.218608	0.316513	0.309923
lcl|NC_003116.1_cds_WP_002212726.1_2012	0.246205	0.462658	0.323416
lcl|NC_003116.1_cds_WP_002212728.1_2010	0.240812	0.448307	0.312736
lcl|NC_003116.1_cds_WP_002212731.1_2008	0.27054	0.592503	0.335944
lcl|NC_003116.1_cds_WP_002212732.1_2007	0.26753	0.511958	0.335168
lcl|NC_003116.1_cds_WP_002212733.1_2006	0.251518	0.582633	0.325182
lcl|NC_003116.1_cds_WP_002212734.1_2005	0.271472	0.568952	0.340795
lcl|NC_003116.1_cds_WP_002212735.1_2004	0.277372	0.711589	0.325487
lcl|NC_003116.1_cds_WP_002212736.1_2003	0.266551	0.626454	0.315992
lcl|NC_003116.1_cds_WP_002212737.1_2002	0.259727	0.605942	0.319114
lcl|NC_003116.1_cds_WP_002212738.1_2001	0.212653	0.310263	0.329447
lcl|NC_003116.1_cds_WP_002212742.1_1999	0.221365	0.465048	0.318157
lcl|NC_003116.1_cds_WP_002212752.1_1994	0.265417	0.558136	0.320618
lcl|NC_003116.1_cds_WP_002212754.1_1993	0.239702	0.503186	0.328111
lcl|NC_003116.1_cds_WP_002212755.1_1992	0.224437	0.458306	0.298846
lcl|NC_003116.1_cds_WP_002212756.1_1991	0.262712	0.560377	0.323721
lcl|NC_003116.1_cds_WP_002212758.1_1989	0.238095	0.403307	0.323369
lcl|NC_003116.1_cds_WP_002212759.1_1988	0.226459	0.442635	0.302879
lcl|NC_003116.1_cds_WP_002212760.1_1987	0.235489	0.419319	0.319069
lcl|NC_003116.1_cds_WP_002212765.1_1984	0.24848	0.551542	0.321046
lcl|NC_003116.1_cds_WP_002212768.1_1983	0.303332	0.664205	0.339853
lcl|NC_003116.1_cds_WP_002212772.1_1976	0.309459	0.669344	0.341912
lcl|NC_003116.1_cds_WP_002212781.1_1970	0.232954	0.501705	0.326534
lcl|NC_003116.1_cds_WP_002212784.1_1966	0.30611	0.692332	0.347533
lcl|NC_003116.1_cds_WP_002212793.1_1946	0.18739	0.248196	0.303068
lcl|NC_003116.1_cds_WP_002212798.1_1941	0.246145	0.490304	0.317721
lcl|NC_003116.1_cds_WP_002212800.1_1940	0.263197	0.563115	0.336944
lcl|NC_003116.1_cds_WP_002212805.1_1934	0.260262	0.432156	0.334647
lcl|NC_003116.1_cds_WP_002212807.1_1931	0.267033	0.555503	0.328298
lcl|NC_003116.1_cds_WP_002212810.1_1928	0.282266	0.602402	0.337921
lcl|NC_003116.1_cds_WP_002212817.1_1921	0.279855	0.532111	0.339682
lcl|NC_003116.1_cds_WP_002212831.1_1906	0.257957	0.516845	0.333368
lcl|NC_003116.1_cds_WP_002212852.1_1877	0.314359	0.636812	0.355869
lcl|NC_003116.1_cds_WP_002212857.1_1873	0.204383	0.307808	0.306264
lcl|NC_003116.1_cds_WP_002212871.1_1858	0.219937	0.471737	0.323916
lcl|NC_003116.1_cds_WP_002212887.1_1845	0.218593	0.367273	0.302407
lcl|NC_003116.1_cds_WP_002212897.1_1833	0.226137	0.357131	0.325485
lcl|NC_003116.1_cds_WP_002212901.1_1831	0.265456	0.500283	0.346448
lcl|NC_003116.1_cds_WP_002212918.1_1824	0.237333	0.514172	0.323569
lcl|NC_003116.1_cds_WP_002212937.1_1814	0.293676	0.722859	0.344596
lcl|NC_003116.1_cds_WP_002212949.1_1807	0.295328	0.515598	0.362317
lcl|NC_003116.1_cds_WP_002212975.1_1791	0.242103	0.485915	0.326656
lcl|NC_003116.1_cds_WP_002212976.1_1790	0.26766	0.556879	0.330192
lcl|NC_003116.1_cds_WP_002212983.1_1784	0.219955	0.349845	0.286768
lcl|NC_003116.1_cds_WP_002212986.1_1783	0.273365	0.555352	0.336175
lcl|NC_003116.1_cds_WP_002212991.1_1782	0.224771	0.491595	0.31422
lcl|NC_003116.1_cds_WP_002213018.1_1766	0.345022	0.658756	0.369087
lcl|NC_003116.1_cds_WP_002213040.1_1756	0.272685	0.583359	0.337223
lcl|NC_003116.1_cds_WP_002213092.1_1735	0.240599	0.490346	0.311566
lcl|NC_003116.1_cds_WP_002213116.1_1728	0.21513	0.341043	0.29799
lcl|NC_003116.1_cds_WP_002213145.1_1712	0.240484	0.478443	0.331628
lcl|NC_003116.1_cds_WP_002213148.1_1710	0.245644	0.555791	0.308461
lcl|NC_003116.1_cds_WP_002213175.1_1700	0.304682	0.64089	0.361008
lcl|NC_003116.1_cds_WP_002213178.1_1698	0.289663	0.645932	0.339435
lcl|NC_003116.1_cds_WP_002213180.1_1697	0.262073	0.47541	0.337618
lcl|NC_003116.1_cds_WP_002213198.1_1689	0.249377	0.545057	0.32406
lcl|NC_003116.1_cds_WP_002213206.1_1684	0.174414	0.400215	0.278805
lcl|NC_003116.1_cds_WP_002213235.1_1669	0.27198	0.550862	0.332171
lcl|NC_003116.1_cds_WP_002213249.1_1657	0.211688	0.371315	0.296924
lcl|NC_003116.1_cds_WP_002213302.1_1632	0.242969	0.501704	0.335545
lcl|NC_003116.1_cds_WP_002213306.1_1630	0.278572	0.513935	0.349314
lcl|NC_003116.1_cds_WP_002213318.1_1626	0.24994	0.576331	0.31097
lcl|NC_003116.1_cds_WP_002213338.1_1615	0.252679	0.548204	0.326846
lcl|NC_003116.1_cds_WP_002213348.1_1611	0.245748	0.456585	0.328299
lcl|NC_003116.1_cds_WP_002213349.1_1610	0.242834	0.439316	0.318156
lcl|NC_003116.1_cds_WP_002213370.1_1601	0.220214	0.380747	0.319799
lcl|NC_003116.1_cds_WP_002213385.1_1591	0.245663	0.466316	0.312379
lcl|NC_003116.1_cds_WP_002213435.1_1546	0.262217	0.410771	0.347707
lcl|NC_003116.1_cds_WP_002213442.1_1543	0.28868	0.719473	0.318619
lcl|NC_003116.1_cds_WP_002213456.1_1535	0.275891	0.646612	0.329464
lcl|NC_003116.1_cds_WP_002213458.1_1534	0.250595	0.456427	0.320344
lcl|NC_003116.1_cds_WP_002213466.1_1530	0.264849	0.521348	0.328883
lcl|NC_003116.1_cds_WP_002213502.1_1503	0.24642	0.477866	0.325666
lcl|NC_003116.1_cds_WP_002213508.1_1496	0.280682	0.562254	0.347321
lcl|NC_003116.1_cds_WP_002213532.1_1479	0.291822	0.640698	0.331739
lcl|NC_003116.1_cds_WP_002213535.1_1477	0.306187	0.629543	0.370119
lcl|NC_003116.1_cds_WP_002213537.1_1475	0.259519	0.442531	0.341788
lcl|NC_003116.1_cds_WP_002213539.1_1473	0.171324	0.216882	0.291822
lcl|NC_003116.1_cds_WP_002213559.1_1453	0.203572	0.311921	0.305424
lcl|NC_003116.1_cds_WP_002213579.1_1436	0.25849	0.515481	0.335736
lcl|NC_003116.1_cds_WP_002213586.1_1428	0.265694	0.56311	0.334558
lcl|NC_003116.1_cds_WP_002213608.1_1417	0.247521	0.439714	0.31604
lcl|NC_003116.1_cds_WP_002213612.1_1413	0.263329	0.497554	0.32421
lcl|NC_003116.1_cds_WP_002213613.1_1412	0.24717	0.414919	0.317308
lcl|NC_003116.1_cds_WP_002213614.1_1411	0.242445	0.414452	0.326386
lcl|NC_003116.1_cds_WP_002213616.1_1401	0.243306	0.41085	0.329796
lcl|NC_003116.1_cds_WP_002213617.1_1400	0.227991	0.416296	0.302826
lcl|NC_003116.1_cds_WP_002213619.1_1398	0.2119	0.301259	0.291272
lcl|NC_003116.1_cds_WP_002213621.1_1397	0.231368	0.368445	0.330071
lcl|NC_003116.1_cds_WP_002213622.1_1396	0.248983	0.365972	0.319181
lcl|NC_003116.1_cds_WP_002213623.1_1395	0.243287	0.465653	0.324557
lcl|NC_003116.1_cds_WP_002213624.1_1394	0.238916	0.558849	0.309112
lcl|NC_003116.1_cds_WP_002213625.1_1393	0.272326	0.54582	0.340259
lcl|NC_003116.1_cds_WP_002213636.1_1386	0.27141	0.620333	0.33259
lcl|NC_003116.1_cds_WP_002213638.1_1384	0.224502	0.39724	0.297196
lcl|NC_003116.1_cds_WP_002213654.1_1366	0.242075	0.477587	0.333339
lcl|NC_003116.1_cds_WP_002213657.1_1363	0.278518	0.574194	0.333736
lcl|NC_003116.1_cds_WP_002213659.1_1362	0.290096	0.613795	0.340935
lcl|NC_003116.1_cds_WP_002213660.1_1361	0.211277	0.32652	0.302913
lcl|NC_003116.1_cds_WP_002213667.1_1347	0.216713	0.439911	0.294951
lcl|NC_003116.1_cds_WP_002213669.1_1345	0.207985	0.305363	0.310411
lcl|NC_003116.1_cds_WP_002213671.1_1343	0.274976	0.637673	0.316965
lcl|NC_003116.1_cds_WP_002213683.1_1328	0.196017	0.310139	0.298388
lcl|NC_003116.1_cds_WP_002213684.1_1327	0.210271	0.298612	0.31539
lcl|NC_003116.1_cds_WP_002213685.1_1326	0.252059	0.397224	0.362671
lcl|NC_003116.1_cds_WP_002213688.1_1323	0.255873	0.361543	0.326282
lcl|NC_003116.1_cds_WP_002213693.1_1318	0.253618	0.520208	0.3041
lcl|NC_003116.1_cds_WP_002213698.1_1308	0.252834	0.472838	0.327938
lcl|NC_003116.1_cds_WP_002213703.1_1304	0.240084	0.471353	0.309999
lcl|NC_003116.1_cds_WP_002213715.1_1293	0.239264	0.439861	0.322096
lcl|NC_003116.1_cds_WP_002213744.1_1243	0.297024	0.622054	0.378607
lcl|NC_003116.1_cds_WP_002213758.1_1238	0.259777	0.527909	0.334972
lcl|NC_003116.1_cds_WP_002213761.1_1237	0.249285	0.521272	0.323641
lcl|NC_003116.1_cds_WP_002213764.1_1236	0.246584	0.404794	0.336251
lcl|NC_003116.1_cds_WP_002213776.1_1230	0.265078	0.543091	0.350506
lcl|NC_003116.1_cds_WP_002213788.1_1226	0.274834	0.597459	0.327406
lcl|NC_003116.1_cds_WP_002213793.1_1221	0.308007	0.725007	0.364873
lcl|NC_003116.1_cds_WP_002213852.1_1184	0.20624	0.340695	0.305787
lcl|NC_003116.1_cds_WP_002213854.1_1183	0.267334	0.499366	0.351299
lcl|NC_003116.1_cds_WP_002213870.1_1175	0.255252	0.487739	0.327156
lcl|NC_003116.1_cds_WP_002213897.1_1156	0.214368	0.277873	0.320343
lcl|NC_003116.1_cds_WP_002213898.1_1155	0.185331	0.310139	0.307882
lcl|NC_003116.1_cds_WP_002213901.1_1152	0.190053	0.267297	0.294181
lcl|NC_003116.1_cds_WP_002213913.1_1138	0.27597	0.562148	0.33637
lcl|NC_003116.1_cds_WP_002213914.1_1137	0.245128	0.425959	0.331956
lcl|NC_003116.1_cds_WP_002213928.1_1122	0.218345	0.307046	0.315342
lcl|NC_003116.1_cds_WP_002213929.1_1121	0.281401	0.597046	0.339934
lcl|NC_003116.1_cds_WP_002213936.1_1114	0.297996	0.633796	0.367009
lcl|NC_003116.1_cds_WP_002213938.1_1111	0.21555	0.309055	0.306049
lcl|NC_003116.1_cds_WP_002213940.1_1109	0.180215	0.282027	0.275232
lcl|NC_003116.1_cds_WP_002213948.1_1099	0.282392	0.676491	0.327443
lcl|NC_003116.1_cds_WP_002213950.1_1098	0.273501	0.613726	0.321853
lcl|NC_003116.1_cds_WP_002213954.1_1096	0.274096	0.62184	0.322026
lcl|NC_003116.1_cds_WP_002213963.1_1089	0.273817	0.554381	0.331339
lcl|NC_003116.1_cds_WP_002213965.1_1088	0.278597	0.572095	0.340637
lcl|NC_003116.1_cds_WP_002213975.1_1084	0.326753	0.649878	0.366747
lcl|NC_003116.1_cds_WP_002213981.1_1080	0.305766	0.736303	0.35325
lcl|NC_003116.1_cds_WP_002214001.1_1062	0.229501	0.479432	0.327475
lcl|NC_003116.1_cds_WP_002214004.1_1060	0.283028	0.575524	0.351762
lcl|NC_003116.1_cds_WP_002214033.1_1039	0.17388	0.270352	0.287633
lcl|NC_003116.1_cds_WP_002214035.1_1038	0.21558	0.46813	0.307419
lcl|NC_003116.1_cds_WP_002214037.1_1037	0.242097	0.489803	0.334024
lcl|NC_003116.1_cds_WP_002214039.1_1035	0.211265	0.411024	0.305314
lcl|NC_003116.1_cds_WP_002214042.1_1032	0.235899	0.504197	0.310779
lcl|NC_003116.1_cds_WP_002214052.1_1026	0.206931	0.40128	0.313602
lcl|NC_003116.1_cds_WP_002214068.1_1017	0.24278	0.484969	0.344037
lcl|NC_003116.1_cds_WP_002214080.1_1009	0.263369	0.599202	0.324231
lcl|NC_003116.1_cds_WP_002214084.1_1007	0.210168	0.261703	0.317825
lcl|NC_003116.1_cds_WP_002214086.1_1006	0.186227	0.235802	0.292821
lcl|NC_003116.1_cds_WP_002214103.1_1004	0.267315	0.526836	0.335919
lcl|NC_003116.1_cds_WP_002214127.1_983	0.258734	0.505955	0.343315
lcl|NC_003116.1_cds_WP_002214152.1_963	0.293336	0.599978	0.345824
lcl|NC_003116.1_cds_WP_002214191.1_936	0.253786	0.47124	0.323595
lcl|NC_003116.1_cds_WP_002214193.1_935	0.254965	0.506845	0.325123
lcl|NC_003116.1_cds_WP_002214198.1_932	0.198608	0.420331	0.293958
lcl|NC_003116.1_cds_WP_002214246.1_914	0.256013	0.582345	0.311039
lcl|NC_003116.1_cds_WP_002214270.1_891	0.216146	0.386783	0.307928
lcl|NC_003116.1_cds_WP_002214279.1_883	0.240704	0.436787	0.32271
lcl|NC_003116.1_cds_WP_002214298.1_871	0.280268	0.591447	0.352189
lcl|NC_003116.1_cds_WP_002214303.1_870	0.302024	0.61583	0.366556
lcl|NC_003116.1_cds_WP_002214312.1_864	0.305137	0.673393	0.338465
lcl|NC_003116.1_cds_WP_002214315.1_861	0.327782	0.716783	0.360849
lcl|NC_003116.1_cds_WP_002214322.1_858	0.309042	0.611555	0.351769
lcl|NC_003116.1_cds_WP_002214325.1_856	0.260117	0.625876	0.30282
lcl|NC_003116.1_cds_WP_002214350.1_823	0.238162	0.492998	0.305183
lcl|NC_003116.1_cds_WP_002214351.1_822	0.196731	0.348349	0.299495
lcl|NC_003116.1_cds_WP_002214352.1_821	0.277145	0.583009	0.343159
lcl|NC_003116.1_cds_WP_002214361.1_817	0.273154	0.596939	0.340655
lcl|NC_003116.1_cds_WP_002214365.1_815	0.298122	0.668353	0.345512
lcl|NC_003116.1_cds_WP_002214370.1_812	0.232099	0.4184	0.334682
lcl|NC_003116.1_cds_WP_002214372.1_811	0.275475	0.600069	0.334883
lcl|NC_003116.1_cds_WP_002214390.1_798	0.274539	0.682199	0.320808
lcl|NC_003116.1_cds_WP_002214399.1_790	0.281058	0.635939	0.337088
lcl|NC_003116.1_cds_WP_002214429.1_763	0.172565	0.275553	0.286339
lcl|NC_003116.1_cds_WP_002214437.1_753	0.175158	0.279888	0.299938
lcl|NC_003116.1_cds_WP_002214440.1_757	0.189564	0.332933	0.325751
lcl|NC_003116.1_cds_WP_002214450.1_746	0.209407	0.379984	0.329311
lcl|NC_003116.1_cds_WP_002214458.1_738	0.212008	0.449267	0.274164
lcl|NC_003116.1_cds_WP_002214462.1_733	0.25302	0.517208	0.320153
lcl|NC_003116.1_cds_WP_002214463.1_732	0.288978	0.625629	0.338854
lcl|NC_003116.1_cds_WP_002214504.1_721	0.225677	0.485268	0.310567
lcl|NC_003116.1_cds_WP_002214507.1_719	0.193921	0.297078	0.274916
lcl|NC_003116.1_cds_WP_002214509.1_718	0.244891	0.44949	0.340316
lcl|NC_003116.1_cds_WP_002214520.1_714	0.264362	0.477343	0.328146
lcl|NC_003116.1_cds_WP_002214522.1_712	0.269904	0.490473	0.339074
lcl|NC_003116.1_cds_WP_002214563.1_687	0.274937	0.522038	0.336572
lcl|NC_003116.1_cds_WP_002214566.1_686	0.27113	0.458398	0.336217
lcl|NC_003116.1_cds_WP_002214596.1_666	0.264015	0.461012	0.359671
lcl|NC_003116.1_cds_WP_002214606.1_654	0.237659	0.429588	0.331975
lcl|NC_003116.1_cds_WP_002214615.1_647	0.197591	0.25412	0.291585
lcl|NC_003116.1_cds_WP_002214617.1_646	0.183189	0.258588	0.291795
lcl|NC_003116.1_cds_WP_002214627.1_638	0.290818	0.61944	0.349192
lcl|NC_003116.1_cds_WP_002214678.1_607	0.237671	0.492244	0.313392
lcl|NC_003116.1_cds_WP_002214681.1_606	0.26283	0.372687	0.339139
lcl|NC_003116.1_cds_WP_002214704.1_592	0.268027	0.579282	0.336128
lcl|NC_003116.1_cds_WP_002214728.1_589	0.273228	0.625167	0.319926
lcl|NC_003116.1_cds_WP_002214730.1_587	0.26804	0.557048	0.310055
lcl|NC_003116.1_cds_WP_002214786.1_547	0.242203	0.390005	0.337467
lcl|NC_003116.1_cds_WP_002214796.1_544	0.248064	0.468415	0.328388
lcl|NC_003116.1_cds_WP_002214801.1_543	0.284437	0.481116	0.362897
lcl|NC_003116.1_cds_WP_002214802.1_542	0.239829	0.478734	0.32165
lcl|NC_003116.1_cds_WP_002214806.1_537	0.284804	0.584259	0.339174
lcl|NC_003116.1_cds_WP_002214819.1_530	0.333218	0.76753	0.366326
lcl|NC_003116.1_cds_WP_002214837.1_520	0.274193	0.630156	0.314705
lcl|NC_003116.1_cds_WP_002214862.1_504	0.18047	0.378948	0.289313
lcl|NC_003116.1_cds_WP_002214868.1_500	0.34259	0.710957	0.390097
lcl|NC_003116.1_cds_WP_002214889.1_481	0.201271	0.300864	0.297571
lcl|NC_003116.1_cds_WP_002214902.1_473	0.255282	0.451589	0.332475
lcl|NC_003116.1_cds_WP_002214913.1_465	0.277147	0.555657	0.344058
lcl|NC_003116.1_cds_WP_002214948.1_445	0.274318	0.5635	0.343028
lcl|NC_003116.1_cds_WP_002214959.1_439	0.2957	0.604316	0.347573
lcl|NC_003116.1_cds_WP_002214967.1_432	0.284922	0.64655	0.332308
lcl|NC_003116.1_cds_WP_002214977.1_424	0.213426	0.384176	0.303348
lcl|NC_003116.1_cds_WP_002214994.1_408	0.256889	0.514813	0.326344
lcl|NC_003116.1_cds_WP_002215000.1_403	0.258909	0.503038	0.346374
lcl|NC_003116.1_cds_WP_002215005.1_401	0.248191	0.531412	0.319982
lcl|NC_003116.1_cds_WP_002215006.1_400	0.240791	0.390294	0.332848
lcl|NC_003116.1_cds_WP_002215008.1_398	0.28544	0.569195	0.347029
lcl|NC_003116.1_cds_WP_002215010.1_397	0.270219	0.611231	0.329579
lcl|NC_003116.1_cds_WP_002215011.1_396	0.337661	0.654085	0.367715
lcl|NC_003116.1_cds_WP_002215045.1_371	0.251385	0.459042	0.332057
lcl|NC_003116.1_cds_WP_002215055.1_365	0.218783	0.341912	0.313327
lcl|NC_003116.1_cds_WP_002215062.1_358	0.273219	0.504092	0.324478
lcl|NC_003116.1_cds_WP_002215072.1_353	0.263973	0.552887	0.32806
lcl|NC_003116.1_cds_WP_002215074.1_352	0.261197	0.583083	0.333509
lcl|NC_003116.1_cds_WP_002215090.1_343	0.294774	0.627791	0.341881
lcl|NC_003116.1_cds_WP_002215106.1_334	0.193575	0.243897	0.30508
lcl|NC_003116.1_cds_WP_002215112.1_332	0.179906	0.286482	0.286537
lcl|NC_003116.1_cds_WP_002215114.1_330	0.182736	0.278936	0.319231
lcl|NC_003116.1_cds_WP_002215116.1_329	0.171953	0.273998	0.298503
lcl|NC_003116.1_cds_WP_002215117.1_328	0.232359	0.345767	0.308214
lcl|NC_003116.1_cds_WP_002215148.1_230	0.271928	0.541147	0.349244
lcl|NC_003116.1_cds_WP_002215152.1_234	0.240347	0.40776	0.31087
lcl|NC_003116.1_cds_WP_002215166.1_240	0.244885	0.459443	0.329126
lcl|NC_003116.1_cds_WP_002215210.1_283	0.309046	0.60798	0.361169
lcl|NC_003116.1_cds_WP_002215245.1_301	0.265675	0.558259	0.33208
lcl|NC_003116.1_cds_WP_002215258.1_217	0.294944	0.609294	0.338307
lcl|NC_003116.1_cds_WP_002215274.1_209	0.224863	0.407667	0.313731
lcl|NC_003116.1_cds_WP_002215316.1_184	0.29372	0.531729	0.32895
lcl|NC_003116.1_cds_WP_002215320.1_183	0.244583	0.49107	0.316271
lcl|NC_003116.1_cds_WP_002215331.1_176	0.171901	0.26354	0.287972
lcl|NC_003116.1_cds_WP_002215336.1_173	0.249102	0.509515	0.332533
lcl|NC_003116.1_cds_WP_002215341.1_169	0.258507	0.47793	0.325243
lcl|NC_003116.1_cds_WP_002215351.1_162	0.298568	0.652817	0.348855
lcl|NC_003116.1_cds_WP_002215366.1_140	0.294281	0.569795	0.358333
lcl|NC_003116.1_cds_WP_002215366.1_155	0.289383	0.574582	0.355291
lcl|NC_003116.1_cds_WP_002215369.1_153	0.178484	0.272832	0.287151
lcl|NC_003116.1_cds_WP_002215373.1_149	0.209388	0.378311	0.334935
lcl|NC_003116.1_cds_WP_002215374.1_148	0.240057	0.465092	0.356137
lcl|NC_003116.1_cds_WP_002215391.1_142	0.28976	0.488322	0.35263
lcl|NC_003116.1_cds_WP_002215392.1_141	0.268032	0.502565	0.348006
lcl|NC_003116.1_cds_WP_002215394.1_139	0.295942	0.568921	0.37243
lcl|NC_003116.1_cds_WP_002215400.1_135	0.235664	0.484116	0.327716
lcl|NC_003116.1_cds_WP_002215402.1_134	0.244066	0.456482	0.331969
lcl|NC_003116.1_cds_WP_002215409.1_132	0.262327	0.45539	0.346033
lcl|NC_003116.1_cds_WP_002215422.1_131	0.226415	0.460541	0.31909
lcl|NC_003116.1_cds_WP_002215424.1_130	0.225948	0.37491	0.328651
lcl|NC_003116.1_cds_WP_002215427.1_129	0.220978	0.343071	0.325889
lcl|NC_003116.1_cds_WP_002215430.1_128	0.242896	0.341666	0.333163
lcl|NC_003116.1_cds_WP_002215432.1_127	0.251611	0.372177	0.343711
lcl|NC_003116.1_cds_WP_002215433.1_126	0.209973	0.342534	0.31973
lcl|NC_003116.1_cds_WP_002215434.1_125	0.220515	0.332762	0.333562
lcl|NC_003116.1_cds_WP_002215435.1_124	0.23419	0.36404	0.347882
lcl|NC_003116.1_cds_WP_002215438.1_121	0.21925	0.288473	0.339703
lcl|NC_003116.1_cds_WP_002215440.1_120	0.210832	0.339958	0.331247
lcl|NC_003116.1_cds_WP_002215441.1_119	0.203123	0.277014	0.314155
lcl|NC_003116.1_cds_WP_002215445.1_118	0.218612	0.312339	0.327583
lcl|NC_003116.1_cds_WP_002215447.1_117	0.231881	0.329604	0.322911
lcl|NC_003116.1_cds_WP_002215450.1_115	0.177345	0.237245	0.294742
lcl|NC_003116.1_cds_WP_002215452.1_114	0.200649	0.239262	0.314019
lcl|NC_003116.1_cds_WP_002215453.1_112	0.231485	0.30401	0.335897
lcl|NC_003116.1_cds_WP_002215455.1_110	0.227404	0.377653	0.333253
lcl|NC_003116.1_cds_WP_002215457.1_109	0.206704	0.329266	0.322245
lcl|NC_003116.1_cds_WP_002215463.1_106	0.228395	0.376482	0.325943
lcl|NC_003116.1_cds_WP_002215466.1_104	0.233039	0.403318	0.320494
lcl|NC_003116.1_cds_WP_002215472.1_98	0.222728	0.450026	0.320394
lcl|NC_003116.1_cds_WP_002215490.1_87	0.250761	0.551914	0.321564
lcl|NC_003116.1_cds_WP_002215509.1_75	0.254202	0.566423	0.333322
lcl|NC_003116.1_cds_WP_002215543.1_54	0.167352	0.30544	0.261046
lcl|NC_003116.1_cds_WP_002215574.1_43	0.303949	0.656073	0.385148
lcl|NC_003116.1_cds_WP_002215582.1_39	0.196832	0.334379	0.309049
lcl|NC_003116.1_cds_WP_002215584.1_38	0.192756	0.345097	0.295624
lcl|NC_003116.1_cds_WP_002215586.1_37	0.203102	0.391363	0.312012
lcl|NC_003116.1_cds_WP_002215587.1_36	0.213796	0.342516	0.30365
lcl|NC_003116.1_cds_WP_002215593.1_31	0.265245	0.54155	0.332092
lcl|NC_003116.1_cds_WP_002215596.1_29	0.234167	0.454093	0.316676
lcl|NC_003116.1_cds_WP_002215603.1_20	0.202391	0.372336	0.297206
lcl|NC_003116.1_cds_WP_002215628.1_5	0.241807	0.489548	0.328653
lcl|NC_003116.1_cds_WP_002215631.1_4	0.263917	0.51062	0.346581
lcl|NC_003116.1_cds_WP_002215661.1_2427	0.268045	0.597927	0.322718
lcl|NC_003116.1_cds_WP_002215673.1_2417	0.253331	0.630824	0.31853
lcl|NC_003116.1_cds_WP_002215675.1_2416	0.256372	0.54013	0.330013
lcl|NC_003116.1_cds_WP_002215704.1_2399	0.238934	0.480765	0.328905
lcl|NC_003116.1_cds_WP_002215768.1_1265	0.235978	0.408073	0.317185
lcl|NC_003116.1_cds_WP_002215768.1_2171	0.235978	0.408073	0.317185
lcl|NC_003116.1_cds_WP_002215770.1_1263	0.244203	0.515889	0.327509
lcl|NC_003116.1_cds_WP_002215770.1_2169	0.244203	0.515889	0.327509
lcl|NC_003116.1_cds_WP_002215782.1_1284	0.254803	0.454367	0.351687
lcl|NC_003116.1_cds_WP_002215782.1_1406	0.254803	0.454367	0.351687
lcl|NC_003116.1_cds_WP_002215782.1_2024	0.254803	0.454367	0.351687
lcl|NC_003116.1_cds_WP_002215783.1_1285	0.230378	0.409179	0.326439
lcl|NC_003116.1_cds_WP_002215783.1_1407	0.230378	0.409179	0.326439
lcl|NC_003116.1_cds_WP_002215783.1_2023	0.230378	0.409179	0.326439
lcl|NC_003116.1_cds_WP_002215784.1_1408	0.263611	0.497796	0.351578
lcl|NC_003116.1_cds_WP_002215784.1_2022	0.263611	0.497796	0.351578
lcl|NC_003116.1_cds_WP_002215844.1_1288	0.276764	0.557582	0.363126
lcl|NC_003116.1_cds_WP_002215844.1_2020	0.271272	0.538615	0.365302
lcl|NC_003116.1_cds_WP_002215845.1_1289	0.214108	0.343896	0.313733
lcl|NC_003116.1_cds_WP_002215845.1_2019	0.214108	0.343896	0.313733
lcl|NC_003116.1_cds_WP_002216125.1_887	0.212695	0.280338	0.320539
lcl|NC_003116.1_cds_WP_002216130.1_262	0.237241	0.531588	0.31543
lcl|NC_003116.1_cds_WP_002216155.1_292	0.272072	0.599111	0.335211
lcl|NC_003116.1_cds_WP_002216156.1_294	0.2631	0.59834	0.323565
lcl|NC_003116.1_cds_WP_002216158.1_295	0.299718	0.625058	0.341787
lcl|NC_003116.1_cds_WP_002216163.1_302	0.262851	0.652652	0.321235
lcl|NC_003116.1_cds_WP_002216198.1_186	0.232914	0.477004	0.324065
lcl|NC_003116.1_cds_WP_002216231.1_156	0.250815	0.593184	0.315961
lcl|NC_003116.1_cds_WP_002216244.1_122	0.241085	0.330214	0.353559
lcl|NC_003116.1_cds_WP_002216248.1_113	0.201741	0.263999	0.28941
lcl|NC_003116.1_cds_WP_002216249.1_111	0.223752	0.331112	0.332376
lcl|NC_003116.1_cds_WP_002216251.1_108	0.228566	0.333018	0.331807
lcl|NC_003116.1_cds_WP_002216270.1_85	0.318086	0.656718	0.36641
lcl|NC_003116.1_cds_WP_002216316.1_44	0.299918	0.656651	0.351385
lcl|NC_003116.1_cds_WP_002216318.1_41	0.234361	0.424299	0.290716
lcl|NC_003116.1_cds_WP_002216332.1_18	0.251967	0.607161	0.329107
lcl|NC_003116.1_cds_WP_002216335.1_16	0.249862	0.556655	0.316639
lcl|NC_003116.1_cds_WP_002216341.1_8	0.276206	0.578475	0.343369
lcl|NC_003116.1_cds_WP_002216361.1_2403	0.248716	0.506678	0.329694
lcl|NC_003116.1_cds_WP_002216373.1_2386	0.254281	0.394678	0.337611
lcl|NC_003116.1_cds_WP_002216391.1_2368	0.271202	0.527667	0.342036
lcl|NC_003116.1_cds_WP_002216394.1_2364	0.329685	0.643298	0.384187
lcl|NC_003116.1_cds_WP_002216396.1_2362	0.253042	0.474044	0.345398
lcl|NC_003116.1_cds_WP_002216405.1_2356	0.287842	0.530851	0.353306
lcl|NC_003116.1_cds_WP_002216408.1_2353	0.280284	0.67206	0.339321
lcl|NC_003116.1_cds_WP_002216425.1_2341	0.246752	0.439772	0.338394
lcl|NC_003116.1_cds_WP_002216438.1_2332	0.24287	0.445556	0.310339
lcl|NC_003116.1_cds_WP_002216505.1_2269	0.293167	0.535774	0.372765
lcl|NC_003116.1_cds_WP_002216515.1_2260	0.240864	0.421587	0.350891
lcl|NC_003116.1_cds_WP_002216522.1_2255	0.197517	0.350506	0.300636
lcl|NC_003116.1_cds_WP_002216540.1_2239	0.263123	0.577515	0.337069
lcl|NC_003116.1_cds_WP_002216549.1_2229	0.2258	0.448379	0.310772
lcl|NC_003116.1_cds_WP_002216567.1_2214	0.245772	0.488161	0.318267
lcl|NC_003116.1_cds_WP_002216584.1_2192	0.283295	0.630127	0.349826
lcl|NC_003116.1_cds_WP_002216585.1_2190	0.245988	0.465377	0.31664
lcl|NC_003116.1_cds_WP_002216597.1_2172	0.18069	0.334639	0.308434
lcl|NC_003116.1_cds_WP_002216608.1_2156	0.266188	0.482091	0.347336
lcl|NC_003116.1_cds_WP_002216612.1_2149	0.234905	0.458046	0.320453
lcl|NC_003116.1_cds_WP_002216615.1_2147	0.30097	0.637178	0.351509
lcl|NC_003116.1_cds_WP_002216633.1_2130	0.220009	0.390355	0.317977
lcl|NC_003116.1_cds_WP_002216635.1_2129	0.293271	0.691757	0.345226
lcl|NC_003116.1_cds_WP_002216644.1_2119	0.203294	0.416613	0.290697
lcl|NC_003116.1_cds_WP_002216708.1_2074	0.199376	0.358776	0.31086
lcl|NC_003116.1_cds_WP_002216735.1_2055	0.230104	0.525991	0.311195
lcl|NC_003116.1_cds_WP_002216785.1_1927	0.282894	0.620159	0.329419
lcl|NC_003116.1_cds_WP_002216786.1_1926	0.236126	0.438252	0.314509
lcl|NC_003116.1_cds_WP_002216797.1_1915	0.275192	0.639409	0.328273
lcl|NC_003116.1_cds_WP_002216799.1_1914	0.260778	0.573063	0.318886
lcl|NC_003116.1_cds_WP_002216827.1_1872	0.226146	0.490492	0.337639
lcl|NC_003116.1_cds_WP_002216828.1_1871	0.262706	0.590712	0.346449
lcl|NC_003116.1_cds_WP_002216842.1_1856	0.289757	0.614228	0.338441
lcl|NC_003116.1_cds_WP_002216849.1_1844	0.235997	0.439035	0.325323
lcl|NC_003116.1_cds_WP_002216859.1_1832	0.236416	0.526504	0.317562
lcl|NC_003116.1_cds_WP_002216892.1_1958	0.240839	0.352059	0.321045
lcl|NC_003116.1_cds_WP_002216921.1_1775	0.279841	0.593616	0.337875
lcl|NC_003116.1_cds_WP_002216929.1_1763	0.257725	0.525877	0.332907
lcl|NC_003116.1_cds_WP_002216944.1_1750	0.298564	0.62045	0.36198
lcl|NC_003116.1_cds_WP_002216974.1_1711	0.232919	0.492978	0.318572
lcl|NC_003116.1_cds_WP_002216984.1_1701	0.267021	0.615628	0.335801
lcl|NC_003116.1_cds_WP_002217010.1_1667	0.299614	0.584255	0.367949
lcl|NC_003116.1_cds_WP_002217013.1_1664	0.252958	0.467943	0.314211
lcl|NC_003116.1_cds_WP_002217017.1_1658	0.273343	0.610823	0.336913
lcl|NC_003116.1_cds_WP_002217061.1_1613	0.222998	0.423905	0.323283
lcl|NC_003116.1_cds_WP_002217077.1_1592	0.176179	0.284792	0.267621
lcl|NC_003116.1_cds_WP_002217102.1_1555	0.266166	0.530146	0.336224
lcl|NC_003116.1_cds_WP_002217104.1_1553	0.252781	0.462923	0.325127
lcl|NC_003116.1_cds_WP_002217125.1_1526	0.247162	0.459544	0.33319
lcl|NC_003116.1_cds_WP_002217171.1_1481	0.266963	0.589029	0.326845
lcl|NC_003116.1_cds_WP_002217188.1_1464	0.238761	0.488338	0.308596
lcl|NC_003116.1_cds_WP_002217189.1_1463	0.278606	0.584504	0.322872
lcl|NC_003116.1_cds_WP_002217207.1_1448	0.263775	0.45699	0.333094
lcl|NC_003116.1_cds_WP_002217209.1_1445	0.261762	0.591432	0.315557
lcl|NC_003116.1_cds_WP_002217214.1_1438	0.288634	0.683074	0.329005
lcl|NC_003116.1_cds_WP_002217215.1_1437	0.267306	0.552149	0.335964
lcl|NC_003116.1_cds_WP_002217218.1_1435	0.235929	0.524548	0.298367
lcl|NC_003116.1_cds_WP_002217222.1_1429	0.221331	0.408336	0.314564
lcl|NC_003116.1_cds_WP_002217228.1_1422	0.255427	0.50947	0.324091
lcl|NC_003116.1_cds_WP_002217230.1_1421	0.259202	0.520012	0.342798
lcl|NC_003116.1_cds_WP_002217325.1_1302	0.313183	0.640104	0.356628
lcl|NC_003116.1_cds_WP_002217326.1_1301	0.2833	0.668711	0.33168
lcl|NC_003116.1_cds_WP_002217365.1_1258	0.230966	0.386698	0.315666
lcl|NC_003116.1_cds_WP_002217373.1_1247	0.181261	0.264584	0.29791
lcl|NC_003116.1_cds_WP_002217388.1_1234	0.254594	0.503099	0.336607
lcl|NC_003116.1_cds_WP_002217390.1_1232	0.189886	0.393202	0.305099
lcl|NC_003116.1_cds_WP_002217399.1_1228	0.283569	0.61513	0.342429
lcl|NC_003116.1_cds_WP_002217403.1_1222	0.266741	0.502254	0.334328
lcl|NC_003116.1_cds_WP_002217406.1_1219	0.212918	0.522103	0.307339
lcl|NC_003116.1_cds_WP_002217424.1_1206	0.274833	0.632377	0.328841
lcl|NC_003116.1_cds_WP_002217501.1_1163	0.187575	0.248206	0.289535
lcl|NC_003116.1_cds_WP_002217503.1_1162	0.225126	0.351733	0.328308
lcl|NC_003116.1_cds_WP_002217508.1_1154	0.188129	0.252043	0.296489
lcl|NC_003116.1_cds_WP_002217512.1_1150	0.20174	0.299421	0.311632
lcl|NC_003116.1_cds_WP_002217551.1_1112	0.275334	0.585361	0.333758
lcl|NC_003116.1_cds_WP_002217553.1_1108	0.183986	0.242487	0.297888
lcl|NC_003116.1_cds_WP_002217560.1_1100	0.240182	0.493507	0.320897
lcl|NC_003116.1_cds_WP_002217573.1_1090	0.248904	0.465279	0.344703
lcl|NC_003116.1_cds_WP_002217574.1_1087	0.261218	0.560058	0.323892
lcl|NC_003116.1_cds_WP_002217575.1_1086	0.270393	0.578943	0.332612
lcl|NC_003116.1_cds_WP_002217611.1_1049	0.268896	0.526646	0.345432
lcl|NC_003116.1_cds_WP_002217622.1_1033	0.271702	0.579419	0.320695
lcl|NC_003116.1_cds_WP_002217667.1_986	0.229964	0.401413	0.312852
lcl|NC_003116.1_cds_WP_002217668.1_985	0.281756	0.542324	0.341386
lcl|NC_003116.1_cds_WP_002217681.1_967	0.283168	0.642662	0.340602
lcl|NC_003116.1_cds_WP_002217691.1_954	0.293809	0.735852	0.333461
lcl|NC_003116.1_cds_WP_002217735.1_920	0.214896	0.263338	0.320466
lcl|NC_003116.1_cds_WP_002217782.1_882	0.218116	0.433019	0.313453
lcl|NC_003116.1_cds_WP_002217790.1_878	0.306135	0.704437	0.344468
lcl|NC_003116.1_cds_WP_002217796.1_872	0.263879	0.523895	0.330219
lcl|NC_003116.1_cds_WP_002217851.1_789	0.213669	0.487378	0.30062
lcl|NC_003116.1_cds_WP_002217875.1_766	0.238136	0.448647	0.320177
lcl|NC_003116.1_cds_WP_002217908.1_713	0.256038	0.53292	0.331609
lcl|NC_003116.1_cds_WP_002217982.1_622	0.290364	0.632181	0.335733
lcl|NC_003116.1_cds_WP_002218000.1_608	0.29737	0.689646	0.337578
lcl|NC_003116.1_cds_WP_002218002.1_605	0.275416	0.447215	0.349633
lcl|NC_003116.1_cds_WP_002218011.1_598	0.283716	0.687198	0.341307
lcl|NC_003116.1_cds_WP_002218025.1_576	0.226763	0.468818	0.308568
lcl|NC_003116.1_cds_WP_002218046.1_551	0.279995	0.652563	0.32919
lcl|NC_003116.1_cds_WP_002218060.1_534	0.282301	0.692017	0.33251
lcl|NC_003116.1_cds_WP_002218065.1_529	0.276911	0.613065	0.339632
lcl|NC_003116.1_cds_WP_002218067.1_527	0.261169	0.593253	0.307873
lcl|NC_003116.1_cds_WP_002218070.1_523	0.287954	0.790606	0.328874
lcl|NC_003116.1_cds_WP_002218098.1_495	0.286196	0.621261	0.347488
lcl|NC_003116.1_cds_WP_002218125.1_468	0.260682	0.537818	0.334105
lcl|NC_003116.1_cds_WP_002218149.1_447	0.24207	0.496157	0.314538
lcl|NC_003116.1_cds_WP_002218169.1_425	0.234838	0.364973	0.318506
lcl|NC_003116.1_cds_WP_002218178.1_409	0.312629	0.654918	0.343722
lcl|NC_003116.1_cds_WP_002218180.1_407	0.252154	0.478299	0.33499
lcl|NC_003116.1_cds_WP_002218194.1_386	0.271504	0.622764	0.32775
lcl|NC_003116.1_cds_WP_002218199.1_380	0.266961	0.606224	0.335962
lcl|NC_003116.1_cds_WP_002218221.1_347	0.308169	0.669486	0.362721
lcl|NC_003116.1_cds_WP_002218222.1_345	0.288927	0.603903	0.369866
lcl|NC_003116.1_cds_WP_002218223.1_342	0.217905	0.351201	0.298918
lcl|NC_003116.1_cds_WP_002218247.1_229	0.235484	0.411212	0.318669
lcl|NC_003116.1_cds_WP_002218252.1_235	0.238372	0.432127	0.296458
lcl|NC_003116.1_cds_WP_002218266.1_246	0.254611	0.523889	0.321831
lcl|NC_003116.1_cds_WP_002218303.1_340	0.18947	0.229977	0.312514
lcl|NC_003116.1_cds_WP_002218307.1_338	0.180614	0.291223	0.308179
lcl|NC_003116.1_cds_WP_002218390.1_1850	0.25664	0.499025	0.327251
lcl|NC_003116.1_cds_WP_002218415.1_151	0.217683	0.356114	0.344095
lcl|NC_003116.1_cds_WP_002218425.1_144	0.208658	0.398055	0.290431
lcl|NC_003116.1_cds_WP_002218431.1_143	0.27165	0.497216	0.336176
lcl|NC_003116.1_cds_WP_002218471.1_300	0.253062	0.514099	0.32216
lcl|NC_003116.1_cds_WP_002218476.1_1951	0.221921	0.365228	0.3227
lcl|NC_003116.1_cds_WP_002218477.1_1950	0.207784	0.310933	0.323791
lcl|NC_003116.1_cds_WP_002218516.1_196	0.225899	0.40979	0.316063
lcl|NC_003116.1_cds_WP_002218543.1_171	0.242213	0.449487	0.320072
lcl|NC_003116.1_cds_WP_002218609.1_64	0.254706	0.505282	0.336447
lcl|NC_003116.1_cds_WP_002218620.1_50	0.283944	0.683016	0.334513
lcl|NC_003116.1_cds_WP_002218627.1_40	0.20002	0.32201	0.312987
lcl|NC_003116.1_cds_WP_002218631.1_32	0.267976	0.534687	0.336838
lcl|NC_003116.1_cds_WP_002218639.1_19	0.218551	0.416282	0.308613
lcl|NC_003116.1_cds_WP_002218661.1_2429	0.307206	0.707177	0.336136
lcl|NC_003116.1_cds_WP_002218694.1_2400	0.225835	0.345026	0.311119
lcl|NC_003116.1_cds_WP_002218717.1_2340	0.233785	0.400956	0.314494
lcl|NC_003116.1_cds_WP_002218765.1_2282	0.269284	0.599202	0.321179
lcl|NC_003116.1_cds_WP_002218781.1_2261	0.235101	0.367464	0.322613
lcl|NC_003116.1_cds_WP_002218783.1_2259	0.249476	0.473122	0.32688
lcl|NC_003116.1_cds_WP_002218795.1_2250	0.246951	0.440091	0.317985
lcl|NC_003116.1_cds_WP_002218845.1_2183	0.232707	0.445201	0.306359
lcl|NC_003116.1_cds_WP_002218848.1_2179	0.224328	0.382047	0.321887
lcl|NC_003116.1_cds_WP_002218865.1_2138	0.217478	0.422865	0.311215
lcl|NC_003116.1_cds_WP_002218933.1_2064	0.263964	0.47425	0.326044
lcl|NC_003116.1_cds_WP_002218939.1_2058	0.311099	0.753522	0.340684
lcl|NC_003116.1_cds_WP_002218952.1_1986	0.250105	0.480924	0.337543
lcl|NC_003116.1_cds_WP_002218982.1_1937	0.233405	0.478432	0.310069
lcl|NC_003116.1_cds_WP_002218986.1_1930	0.300925	0.664482	0.341675
lcl|NC_003116.1_cds_WP_002218993.1_1910	0.234988	0.493057	0.31179
lcl|NC_003116.1_cds_WP_002219018.1_1861	0.264313	0.542647	0.335844
lcl|NC_003116.1_cds_WP_002219028.1_1846	0.245829	0.452289	0.327452
lcl|NC_003116.1_cds_WP_002219033.1_1834	0.254155	0.513529	0.324059
lcl|NC_003116.1_cds_WP_002219034.1_1830	0.288516	0.60852	0.339101
lcl|NC_003116.1_cds_WP_002219079.1_1758	0.276716	0.56744	0.341546
lcl|NC_003116.1_cds_WP_002219084.1_1753	0.284282	0.680743	0.318838
lcl|NC_003116.1_cds_WP_002219120.1_1692	0.284482	0.660602	0.326824
lcl|NC_003116.1_cds_WP_002219133.1_1672	0.224708	0.395571	0.315928
lcl|NC_003116.1_cds_WP_002219151.1_1645	0.249625	0.520652	0.324302
lcl|NC_003116.1_cds_WP_002219162.1_1627	0.253373	0.513151	0.316002
lcl|NC_003116.1_cds_WP_002219188.1_1590	0.311336	0.65887	0.358611
lcl|NC_003116.1_cds_WP_002219258.1_1480	0.2628	0.559691	0.320192
lcl|NC_003116.1_cds_WP_002219327.1_1379	0.276321	0.625732	0.331231
lcl|NC_003116.1_cds_WP_002219328.1_1378	0.256585	0.524568	0.321705
lcl|NC_003116.1_cds_WP_002219332.1_1374	0.271512	0.514544	0.345464
lcl|NC_003116.1_cds_WP_002219343.1_1349	0.253898	0.569619	0.328397
lcl|NC_003116.1_cds_WP_002219349.1_1333	0.310373	0.664704	0.342265
lcl|NC_003116.1_cds_WP_002219350.1_1331	0.221997	0.432162	0.307249
lcl|NC_003116.1_cds_WP_002219372.1_1283	0.216365	0.296023	0.310534
lcl|NC_003116.1_cds_WP_002219372.1_1405	0.216365	0.296023	0.310534
lcl|NC_003116.1_cds_WP_002219372.1_2025	0.216365	0.296023	0.310534
lcl|NC_003116.1_cds_WP_002219376.1_1277	0.212413	0.363418	0.280213
lcl|NC_003116.1_cds_WP_002219454.1_1179	0.238115	0.455349	0.325379
lcl|NC_003116.1_cds_WP_002219463.1_1168	0.272794	0.607225	0.322786
lcl|NC_003116.1_cds_WP_002219464.1_1167	0.215207	0.394529	0.312026
lcl|NC_003116.1_cds_WP_002219507.1_1095	0.292796	0.574982	0.343317
lcl|NC_003116.1_cds_WP_002219640.1_907	0.257837	0.602858	0.309013
lcl|NC_003116.1_cds_WP_002219647.1_895	0.273403	0.658016	0.32389
lcl|NC_003116.1_cds_WP_002219655.1_877	0.253817	0.518885	0.330325
lcl|NC_003116.1_cds_WP_002219665.1_860	0.282392	0.58793	0.32405
lcl|NC_003116.1_cds_WP_002219686.1_816	0.271197	0.588177	0.335377
lcl|NC_003116.1_cds_WP_002219688.1_813	0.304172	0.605889	0.36124
lcl|NC_003116.1_cds_WP_002219692.1_808	0.225222	0.48633	0.316935
lcl|NC_003116.1_cds_WP_002219725.1_750	0.209299	0.29705	0.329413
lcl|NC_003116.1_cds_WP_002219786.1_716	0.206371	0.359865	0.305792
lcl|NC_003116.1_cds_WP_002219789.1_711	0.281247	0.568956	0.337725
lcl|NC_003116.1_cds_WP_002219820.1_652	0.266503	0.475942	0.325558
lcl|NC_003116.1_cds_WP_002219833.1_627	0.301428	0.685937	0.356834
lcl|NC_003116.1_cds_WP_002219840.1_614	0.269907	0.592902	0.322291
lcl|NC_003116.1_cds_WP_002219852.1_585	0.216676	0.399304	0.325251
lcl|NC_003116.1_cds_WP_002219878.1_519	0.258745	0.620186	0.315241
lcl|NC_003116.1_cds_WP_002219879.1_517	0.273354	0.632889	0.310462
lcl|NC_003116.1_cds_WP_002219881.1_515	0.245742	0.496729	0.334867
lcl|NC_003116.1_cds_WP_002219882.1_514	0.241752	0.508485	0.319017
lcl|NC_003116.1_cds_WP_002219938.1_435	0.278508	0.661332	0.320165
lcl|NC_003116.1_cds_WP_002219941.1_429	0.248231	0.465268	0.28365
lcl|NC_003116.1_cds_WP_002219976.1_357	0.29085	0.612468	0.33713
lcl|NC_003116.1_cds_WP_002219992.1_327	0.196211	0.279814	0.3045
lcl|NC_003116.1_cds_WP_002219993.1_325	0.161041	0.233281	0.300233
lcl|NC_003116.1_cds_WP_002219994.1_322	0.282802	0.544329	0.336404
lcl|NC_003116.1_cds_WP_002219998.1_317	0.218814	0.511225	0.329688
lcl|NC_003116.1_cds_WP_002219999.1_316	0.234874	0.374241	0.329544
lcl|NC_003116.1_cds_WP_002220087.1_299	0.25854	0.539634	0.328196
lcl|NC_003116.1_cds_WP_002220151.1_152	0.208424	0.338317	0.326456
lcl|NC_003116.1_cds_WP_002220172.1_107	0.190059	0.311219	0.311011
lcl|NC_003116.1_cds_WP_002220254.1_2392	0.188316	0.285765	0.309183
lcl|NC_003116.1_cds_WP_002220276.1_2357	0.244569	0.491024	0.316511
lcl|NC_003116.1_cds_WP_002220318.1_2312	0.20507	0.257293	0.308793
lcl|NC_003116.1_cds_WP_002220331.1_2297	0.22943	0.38345	0.323661
lcl|NC_003116.1_cds_WP_002220358.1_2266	0.234816	0.449553	0.335821
lcl|NC_003116.1_cds_WP_002220359.1_2265	0.212095	0.406439	0.312951
lcl|NC_003116.1_cds_WP_002220424.1_2137	0.238867	0.350047	0.336278
lcl|NC_003116.1_cds_WP_002220448.1_2113	0.252559	0.526952	0.32726
lcl|NC_003116.1_cds_WP_002220465.1_2097	0.265032	0.520054	0.327684
lcl|NC_003116.1_cds_WP_002220484.1_2065	0.232234	0.45125	0.333038
lcl|NC_003116.1_cds_WP_002220574.1_1865	0.220274	0.377173	0.306845
lcl|NC_003116.1_cds_WP_002220582.1_1852	0.248478	0.464329	0.330989
lcl|NC_003116.1_cds_WP_002220639.1_1144	0.276369	0.619548	0.329979
lcl|NC_003116.1_cds_WP_002220640.1_1145	0.261438	0.591959	0.32936
lcl|NC_003116.1_cds_WP_002220650.1_1159	0.173588	0.243254	0.287553
lcl|NC_003116.1_cds_WP_002220668.1_1181	0.276293	0.568596	0.332316
lcl|NC_003116.1_cds_WP_002220801.1_1722	0.218547	0.305828	0.323128
lcl|NC_003116.1_cds_WP_002220874.1_1614	0.240513	0.492477	0.318414
lcl|NC_003116.1_cds_WP_002220876.1_1612	0.249575	0.435057	0.33331
lcl|NC_003116.1_cds_WP_002221015.1_1433	0.25873	0.546417	0.331129
lcl|NC_003116.1_cds_WP_002221017.1_1431	0.256155	0.522025	0.308976
lcl|NC_003116.1_cds_WP_002221039.1_1380	0.272741	0.522407	0.341946
lcl|NC_003116.1_cds_WP_002221068.1_1325	0.21347	0.318145	0.318319
lcl|NC_003116.1_cds_WP_002221081.1_1287	0.242413	0.553334	0.31905
lcl|NC_003116.1_cds_WP_002221084.1_1280	0.220419	0.31898	0.321767
lcl|NC_003116.1_cds_WP_002221084.1_1402	0.220419	0.31898	0.321767
lcl|NC_003116.1_cds_WP_002221098.1_1266	0.170263	0.299869	0.303975
lcl|NC_003116.1_cds_WP_002221100.1_1264	0.244948	0.419818	0.334992
lcl|NC_003116.1_cds_WP_002221100.1_2170	0.244948	0.419818	0.334992
lcl|NC_003116.1_cds_WP_002221124.1_1235	0.230594	0.47157	0.31051
lcl|NC_003116.1_cds_WP_002221175.1_1094	0.230043	0.424554	0.316847
lcl|NC_003116.1_cds_WP_002221189.1_1076	0.29016	0.569587	0.356085
lcl|NC_003116.1_cds_WP_002221248.1_992	0.253343	0.539469	0.326949
lcl|NC_003116.1_cds_WP_002221259.1_978	0.254018	0.573359	0.318479
lcl|NC_003116.1_cds_WP_002221262.1_971	0.273358	0.588788	0.338031
lcl|NC_003116.1_cds_WP_002221265.1_966	0.245969	0.586372	0.313881
lcl|NC_003116.1_cds_WP_002221266.1_965	0.25255	0.458297	0.309535
lcl|NC_003116.1_cds_WP_002221286.1_941	0.266557	0.534519	0.343711
lcl|NC_003116.1_cds_WP_002221314.1_915	0.250753	0.583909	0.305156
lcl|NC_003116.1_cds_WP_002221323.1_899	0.250109	0.571827	0.322392
lcl|NC_003116.1_cds_WP_002221336.1_868	0.250875	0.55121	0.3097
lcl|NC_003116.1_cds_WP_002221353.1_834	0.236437	0.500453	0.315
lcl|NC_003116.1_cds_WP_002221356.1_829	0.222426	0.40231	0.314139
lcl|NC_003116.1_cds_WP_002221413.1_777	0.244787	0.557299	0.302111
lcl|NC_003116.1_cds_WP_002221436.1_745	0.199492	0.279194	0.29626
lcl|NC_003116.1_cds_WP_002221455.1_561	0.238437	0.504821	0.317887
lcl|NC_003116.1_cds_WP_002221463.1_545	0.238816	0.412695	0.334291
lcl|NC_003116.1_cds_WP_002221465.1_541	0.216347	0.391559	0.29175
lcl|NC_003116.1_cds_WP_002221497.1_680	0.260996	0.499103	0.329734
lcl|NC_003116.1_cds_WP_002221499.1_679	0.22535	0.481326	0.313763
lcl|NC_003116.1_cds_WP_002221535.1_618	0.288082	0.606364	0.330443
lcl|NC_003116.1_cds_WP_002221536.1_617	0.241314	0.467673	0.319467
lcl|NC_003116.1_cds_WP_002221589.1_2423	0.210181	0.368911	0.295373
lcl|NC_003116.1_cds_WP_002221605.1_3	0.191845	0.292044	0.299223
lcl|NC_003116.1_cds_WP_002221652.1_501	0.319467	0.669245	0.384038
lcl|NC_003116.1_cds_WP_002221681.1_453	0.2069	0.320923	0.304883
lcl|NC_003116.1_cds_WP_002221692.1_438	0.282079	0.599717	0.342205
lcl|NC_003116.1_cds_WP_002221762.1_260	0.271109	0.495798	0.342087
lcl|NC_003116.1_cds_WP_002221801.1_215	0.22203	0.328907	0.315801
lcl|NC_003116.1_cds_WP_002221845.1_145	0.246305	0.423318	0.339072
lcl|NC_003116.1_cds_WP_002221877.1_62	0.293095	0.725273	0.333204
lcl|NC_003116.1_cds_WP_002221902.1_25	0.232148	0.469333	0.332511
lcl|NC_003116.1_cds_WP_002221967.1_2360	0.215851	0.372132	0.306398
lcl|NC_003116.1_cds_WP_002221968.1_2358	0.270936	0.470444	0.33322
lcl|NC_003116.1_cds_WP_002222009.1_2291	0.294968	0.67309	0.336836
lcl|NC_003116.1_cds_WP_002222073.1_2185	0.234945	0.500215	0.310791
lcl|NC_003116.1_cds_WP_002222106.1_2135	0.251242	0.469014	0.342313
lcl|NC_003116.1_cds_WP_002222140.1_2094	0.256555	0.580321	0.320964
lcl|NC_003116.1_cds_WP_002222212.1_1909	0.254182	0.510251	0.324132
lcl|NC_003116.1_cds_WP_002222213.1_1908	0.230354	0.418579	0.315201
lcl|NC_003116.1_cds_WP_002222215.1_1905	0.22468	0.389287	0.312518
lcl|NC_003116.1_cds_WP_002222216.1_1904	0.255384	0.498765	0.320421
lcl|NC_003116.1_cds_WP_002222238.1_1853	0.219073	0.415549	0.31755
lcl|NC_003116.1_cds_WP_002222321.1_1702	0.220368	0.377619	0.299455
lcl|NC_003116.1_cds_WP_002222371.1_1616	0.256282	0.497784	0.325005
lcl|NC_003116.1_cds_WP_002222381.1_1595	0.177304	0.24798	0.292502
lcl|NC_003116.1_cds_WP_002222431.1_1494	0.30856	0.647561	0.360369
lcl|NC_003116.1_cds_WP_002222445.1_1478	0.301176	0.679242	0.362721
lcl|NC_003116.1_cds_WP_002222463.1_1455	0.269627	0.563572	0.329588
lcl|NC_003116.1_cds_WP_002222468.1_1451	0.235049	0.425163	0.324322
lcl|NC_003116.1_cds_WP_002222469.1_1450	0.214448	0.389929	0.308287
lcl|NC_003116.1_cds_WP_002222471.1_1449	0.260077	0.542335	0.337754
lcl|NC_003116.1_cds_WP_002222472.1_1447	0.29872	0.653065	0.346471
lcl|NC_003116.1_cds_WP_002222526.1_1383	0.159751	0.241149	0.284796
lcl|NC_003116.1_cds_WP_002222528.1_1377	0.266795	0.502774	0.341209
lcl|NC_003116.1_cds_WP_002222553.1_1540	0.258401	0.41794	0.334801
lcl|NC_003116.1_cds_WP_002222591.1_1291	0.255851	0.417015	0.333871
lcl|NC_003116.1_cds_WP_002222592.1_1290	0.202568	0.400439	0.305536
lcl|NC_003116.1_cds_WP_002222650.1_1198	0.228247	0.468601	0.31676
lcl|NC_003116.1_cds_WP_002222678.1_1158	0.183758	0.220727	0.286983
lcl|NC_003116.1_cds_WP_002222699.1_1104	0.252257	0.457284	0.330662
lcl|NC_003116.1_cds_WP_002222706.1_1093	0.234867	0.507378	0.316787
lcl|NC_003116.1_cds_WP_002222716.1_1078	0.252708	0.506185	0.324617
lcl|NC_003116.1_cds_WP_002222748.1_1018	0.253319	0.499888	0.325983
lcl|NC_003116.1_cds_WP_002222781.1_953	0.313373	0.694836	0.355541
lcl|NC_003116.1_cds_WP_002222784.1_948	0.239991	0.483328	0.326173
lcl|NC_003116.1_cds_WP_002222814.1_921	0.208725	0.369512	0.308319
lcl|NC_003116.1_cds_WP_002222885.1_807	0.207472	0.332389	0.30595
lcl|NC_003116.1_cds_WP_002222940.1_729	0.232183	0.403528	0.331002
lcl|NC_003116.1_cds_WP_002222949.1_2166	0.209509	0.335948	0.311263
lcl|NC_003116.1_cds_WP_002222978.1_708	0.285838	0.609267	0.339067
lcl|NC_003116.1_cds_WP_002223013.1_655	0.284572	0.681685	0.333226
lcl|NC_003116.1_cds_WP_002223096.1_532	0.263824	0.578579	0.321374
lcl|NC_003116.1_cds_WP_002223111.1_498	0.247288	0.522465	0.325323
lcl|NC_003116.1_cds_WP_002223115.1_494	0.286298	0.578832	0.346622
lcl|NC_003116.1_cds_WP_002223117.1_492	0.222534	0.466209	0.310364
lcl|NC_003116.1_cds_WP_002223159.1_441	0.247666	0.493853	0.319395
lcl|NC_003116.1_cds_WP_002223169.1_406	0.267346	0.495835	0.337958
lcl|NC_003116.1_cds_WP_002223171.1_405	0.252196	0.560861	0.318811
lcl|NC_003116.1_cds_WP_002223188.1_376	0.266229	0.541279	0.328849
lcl|NC_003116.1_cds_WP_002223225.1_233	0.257352	0.444868	0.32716
lcl|NC_003116.1_cds_WP_002223233.1_249	0.182427	0.320131	0.293544
lcl|NC_003116.1_cds_WP_002223324.1_14	0.271579	0.545381	0.355264
lcl|NC_003116.1_cds_WP_002223465.1_2207	0.252469	0.45402	0.330082
lcl|NC_003116.1_cds_WP_002223576.1_1847	0.283242	0.592518	0.347504
lcl|NC_003116.1_cds_WP_002223582.1_1949	0.186442	0.283688	0.295595
lcl|NC_003116.1_cds_WP_002223585.1_1952	0.267796	0.452278	0.362275
lcl|NC_003116.1_cds_WP_002223586.1_1953	0.205246	0.31429	0.310612
lcl|NC_003116.1_cds_WP_002223610.1_1792	0.259485	0.492182	0.327332
lcl|NC_003116.1_cds_WP_002223758.1_1495	0.24656	0.480815	0.317435
lcl|NC_003116.1_cds_WP_002223771.1_1458	0.247132	0.389692	0.301531
lcl|NC_003116.1_cds_WP_002223791.1_1430	0.290722	0.604657	0.343647
lcl|NC_003116.1_cds_WP_002223806.1_1385	0.305917	0.761847	0.338863
lcl|NC_003116.1_cds_WP_002223955.1_924	0.266042	0.671577	0.309467
lcl|NC_003116.1_cds_WP_002224011.1_761	0.194692	0.226431	0.275109
lcl|NC_003116.1_cds_WP_002224077.1_667	0.23926	0.427467	0.334243
lcl|NC_003116.1_cds_WP_002224103.1_588	0.269629	0.483794	0.320587
lcl|NC_003116.1_cds_WP_002224163.1_402	0.255701	0.562776	0.326626
lcl|NC_003116.1_cds_WP_002224176.1_374	0.220575	0.383831	0.325151
lcl|NC_003116.1_cds_WP_002224189.1_335	0.175191	0.273247	0.293635
lcl|NC_003116.1_cds_WP_002224575.1_1239	0.258825	0.502832	0.353636
lcl|NC_003116.1_cds_WP_002224590.1_1172	0.243109	0.380381	0.32767
lcl|NC_003116.1_cds_WP_002224592.1_1143	0.299154	0.771124	0.336468
lcl|NC_003116.1_cds_WP_002224630.1_828	0.266988	0.612454	0.339553
lcl|NC_003116.1_cds_WP_002224689.1_431	0.273363	0.628097	0.32496
lcl|NC_003116.1_cds_WP_002224701.1_354	0.307043	0.768978	0.331335
lcl|NC_003116.1_cds_WP_002224718.1_231	0.24987	0.51726	0.329954
lcl|NC_003116.1_cds_WP_002224866.1_2371	0.239936	0.419159	0.333148
lcl|NC_003116.1_cds_WP_002224913.1_2271	0.26732	0.557991	0.341615
lcl|NC_003116.1_cds_WP_002225001.1_2059	0.300299	0.676748	0.353555
lcl|NC_003116.1_cds_WP_002225057.1_1870	0.239962	0.573386	0.312579
lcl|NC_003116.1_cds_WP_002225099.1_1802	0.223879	0.396995	0.350434
lcl|NC_003116.1_cds_WP_002225119.1_1742	0.25241	0.519197	0.330794
lcl|NC_003116.1_cds_WP_002225133.1_1717	0.290291	0.726042	0.331544
lcl|NC_003116.1_cds_WP_002225170.1_1604	0.265174	0.565488	0.317879
lcl|NC_003116.1_cds_WP_002225188.1_1517	0.273268	0.602507	0.329678
lcl|NC_003116.1_cds_WP_002225282.1_1346	0.284513	0.711654	0.32868
lcl|NC_003116.1_cds_WP_002225286.1_1329	0.272839	0.533975	0.33479
lcl|NC_003116.1_cds_WP_002225301.1_1281	0.218351	0.325331	0.31428
lcl|NC_003116.1_cds_WP_002225301.1_1403	0.218351	0.325331	0.31428
lcl|NC_003116.1_cds_WP_002225310.1_2173	0.228463	0.377485	0.31581
lcl|NC_003116.1_cds_WP_002225316.1_1242	0.239189	0.451564	0.33255
lcl|NC_003116.1_cds_WP_002225335.1_1213	0.248418	0.480642	0.332009
lcl|NC_003116.1_cds_WP_002225376.1_1169	0.275131	0.581822	0.338452
lcl|NC_003116.1_cds_WP_002225383.1_1160	0.168584	0.252972	0.279246
lcl|NC_003116.1_cds_WP_002225505.1_940	0.230149	0.408285	0.320523
lcl|NC_003116.1_cds_WP_002225587.1_780	0.234211	0.468773	0.328259
lcl|NC_003116.1_cds_WP_002225648.1_720	0.225546	0.430152	0.320794
lcl|NC_003116.1_cds_WP_002225667.1_671	0.28796	0.659305	0.344264
lcl|NC_003116.1_cds_WP_002225670.1_664	0.210075	0.367132	0.305264
lcl|NC_003116.1_cds_WP_002225674.1_446	0.248673	0.540852	0.309165
lcl|NC_003116.1_cds_WP_002225675.1_444	0.293726	0.69933	0.34307
lcl|NC_003116.1_cds_WP_002225676.1_443	0.278848	0.612857	0.330273
lcl|NC_003116.1_cds_WP_002225717.1_367	0.229784	0.499986	0.311455
lcl|NC_003116.1_cds_WP_002225750.1_253	0.261664	0.488994	0.329377
lcl|NC_003116.1_cds_WP_002225846.1_503	0.245343	0.542941	0.30803
lcl|NC_003116.1_cds_WP_002225856.1_487	0.245363	0.435504	0.327488
lcl|NC_003116.1_cds_WP_002225874.1_460	0.277275	0.560625	0.335751
lcl|NC_003116.1_cds_WP_002225990.1_30	0.252933	0.489766	0.330747
lcl|NC_003116.1_cds_WP_002226062.1_2300	0.24791	0.526121	0.337309
lcl|NC_003116.1_cds_WP_002226164.1_2076	0.195854	0.346894	0.312665
lcl|NC_003116.1_cds_WP_002226185.1_1919	0.269911	0.599696	0.350709
lcl|NC_003116.1_cds_WP_002226213.1_1854	0.304672	0.741376	0.341199
lcl|NC_003116.1_cds_WP_002226227.1_1819	0.237724	0.437513	0.325721
lcl|NC_003116.1_cds_WP_002226263.1_853	0.153136	0.233759	0.282235
lcl|NC_003116.1_cds_WP_002226303.1_1642	0.229475	0.420417	0.314638
lcl|NC_003116.1_cds_WP_002226346.1_1518	0.256311	0.497144	0.34061
lcl|NC_003116.1_cds_WP_002226415.1_1251	0.228945	0.443555	0.334439
lcl|NC_003116.1_cds_WP_002226420.1_1241	0.280695	0.589389	0.347738
lcl|NC_003116.1_cds_WP_002226436.1_1197	0.217884	0.383338	0.311398
lcl|NC_003116.1_cds_WP_002226495.1_1064	0.236567	0.419278	0.329015
lcl|NC_003116.1_cds_WP_002226537.1_970	0.218608	0.412548	0.325013
lcl|NC_003116.1_cds_WP_002226543.1_949	0.218735	0.407449	0.309336
lcl|NC_003116.1_cds_WP_002226590.1_875	0.238002	0.433969	0.328521
lcl|NC_003116.1_cds_WP_002226664.1_734	0.262863	0.600885	0.328872
lcl|NC_003116.1_cds_WP_002226677.1_701	0.25757	0.572591	0.3203
lcl|NC_003116.1_cds_WP_002226748.1_526	0.270699	0.661466	0.328536
lcl|NC_003116.1_cds_WP_002226759.1_491	0.26453	0.574671	0.337974
lcl|NC_003116.1_cds_WP_002226942.1_2436	0.227104	0.513878	0.295739
lcl|NC_003116.1_cds_WP_002226945.1_2432	0.267028	0.707605	0.297657
lcl|NC_003116.1_cds_WP_002227012.1_2302	0.238702	0.463614	0.323062
lcl|NC_003116.1_cds_WP_002227032.1_2258	0.26888	0.569885	0.331697
lcl|NC_003116.1_cds_WP_002227074.1_2161	0.234249	0.436808	0.319192
lcl|NC_003116.1_cds_WP_002227076.1_2155	0.172877	0.284359	0.297611
lcl|NC_003116.1_cds_WP_002227106.1_2086	0.266523	0.561261	0.340631
lcl|NC_003116.1_cds_WP_002227143.1_1874	0.243293	0.366963	0.340889
lcl|NC_003116.1_cds_WP_002227199.1_1364	0.270947	0.597273	0.32671
lcl|NC_003116.1_cds_WP_002227254.1_1643	0.258803	0.467664	0.333229
lcl|NC_003116.1_cds_WP_002227255.1_1637	0.294735	0.618146	0.330483
lcl|NC_003116.1_cds_WP_002227257.1_1636	0.269279	0.532998	0.33447
lcl|NC_003116.1_cds_WP_002227527.1_945	0.227264	0.382552	0.318517
lcl|NC_003116.1_cds_WP_002227547.1_888	0.287026	0.643789	0.337535
lcl|NC_003116.1_cds_WP_002227645.1_642	0.241577	0.468808	0.325237
lcl|NC_003116.1_cds_WP_002227750.1_372	0.264889	0.5274	0.341343
lcl|NC_003116.1_cds_WP_002227796.1_2363	0.190908	0.331676	0.301696
lcl|NC_003116.1_cds_WP_002228833.1_289	0.250587	0.44178	0.340304
lcl|NC_003116.1_cds_WP_002228895.1_65	0.276747	0.713068	0.316067
lcl|NC_003116.1_cds_WP_002228902.1_61	0.278164	0.703526	0.313751
lcl|NC_003116.1_cds_WP_002228923.1_2426	0.274744	0.484048	0.336123
lcl|NC_003116.1_cds_WP_002228924.1_12	0.173318	0.23224	0.29394
lcl|NC_003116.1_cds_WP_002228968.1_2372	0.274421	0.641705	0.327909
lcl|NC_003116.1_cds_WP_002228978.1_2352	0.29018	0.647784	0.339406
lcl|NC_003116.1_cds_WP_002229046.1_2273	0.298598	0.702196	0.342195
lcl|NC_003116.1_cds_WP_002229055.1_2220	0.282513	0.569481	0.344913
lcl|NC_003116.1_cds_WP_002229077.1_2184	0.230303	0.422052	0.323325
lcl|NC_003116.1_cds_WP_002229103.1_770	0.277887	0.638645	0.329444
lcl|NC_003116.1_cds_WP_002229145.1_859	0.27737	0.456391	0.339841
lcl|NC_003116.1_cds_WP_002229166.1_909	0.26613	0.600458	0.32042
lcl|NC_003116.1_cds_WP_002229182.1_952	0.29794	0.677368	0.33248
lcl|NC_003116.1_cds_WP_002229195.1_968	0.263506	0.574255	0.333892
lcl|NC_003116.1_cds_WP_002229244.1_1041	0.235993	0.481415	0.3202
lcl|NC_003116.1_cds_WP_002229313.1_1171	0.226256	0.474913	0.309983
lcl|NC_003116.1_cds_WP_002229426.1_1367	0.255722	0.396761	0.343523
lcl|NC_003116.1_cds_WP_002229439.1_1399	0.180986	0.289836	0.288246
lcl|NC_003116.1_cds_WP_002229479.1_1468	0.297931	0.64473	0.34376
lcl|NC_003116.1_cds_WP_002229501.1_1511	0.250632	0.445329	0.341711
lcl|NC_003116.1_cds_WP_002229506.1_1513	0.21809	0.453019	0.304522
lcl|NC_003116.1_cds_WP_002229581.1_1680	0.242166	0.4785	0.330662
lcl|NC_003116.1_cds_WP_002229591.1_1679	0.260746	0.49989	0.324313
lcl|NC_003116.1_cds_WP_002229594.1_1677	0.243809	0.521532	0.321783
lcl|NC_003116.1_cds_WP_002229688.1_1864	0.257978	0.463497	0.332574
lcl|NC_003116.1_cds_WP_002229697.1_1857	0.213969	0.363962	0.313288
lcl|NC_003116.1_cds_WP_002229716.1_1917	0.281067	0.63205	0.337817
lcl|NC_003116.1_cds_WP_002229733.1_1944	0.243203	0.5008	0.323074
lcl|NC_003116.1_cds_WP_002229738.1_1962	0.291243	0.641145	0.345048
lcl|NC_003116.1_cds_WP_002229746.1_1974	0.270421	0.635464	0.336754
lcl|NC_003116.1_cds_WP_002229795.1_2095	0.273304	0.59323	0.322997
lcl|NC_003116.1_cds_WP_002229798.1_2096	0.252564	0.544791	0.328072
lcl|NC_003116.1_cds_WP_002230062.1_369	0.256158	0.458761	0.336999
lcl|NC_003116.1_cds_WP_002230190.1_159	0.183265	0.249996	0.285846
lcl|NC_003116.1_cds_WP_002230231.1_2338	0.267147	0.577805	0.319364
lcl|NC_003116.1_cds_WP_002230233.1_2336	0.271042	0.631179	0.331731
lcl|NC_003116.1_cds_WP_002230289.1_2180	0.223179	0.360467	0.316473
lcl|NC_003116.1_cds_WP_002230315.1_782	0.235755	0.506267	0.316828
lcl|NC_003116.1_cds_WP_002230734.1_1903	0.273603	0.626828	0.330693
lcl|NC_003116.1_cds_WP_002230746.1_1920	0.272807	0.583706	0.352412
lcl|NC_003116.1_cds_WP_002231013.1_238	0.218874	0.329472	0.303149
lcl|NC_003116.1_cds_WP_002231430.1_213	0.22577	0.36698	0.314692
lcl|NC_003116.1_cds_WP_002231465.1_185	0.259632	0.477594	0.327729
lcl|NC_003116.1_cds_WP_002231529.1_133	0.219949	0.391906	0.350884
lcl|NC_003116.1_cds_WP_002231539.1_101	0.19348	0.360512	0.271535
lcl|NC_003116.1_cds_WP_002231540.1_100	0.171578	0.317646	0.284321
lcl|NC_003116.1_cds_WP_002231544.1_93	0.29082	0.718997	0.324591
lcl|NC_003116.1_cds_WP_002231608.1_11	0.207393	0.381656	0.319855
lcl|NC_003116.1_cds_WP_002231682.1_2384	0.246538	0.460326	0.32916
lcl|NC_003116.1_cds_WP_002231834.1_762	0.178179	0.288737	0.289454
lcl|NC_003116.1_cds_WP_002231890.1_1947	0.279202	0.660041	0.331564
lcl|NC_003116.1_cds_WP_002231975.1_925	0.318426	0.70332	0.344004
lcl|NC_003116.1_cds_WP_002231976.1_926	0.269918	0.711646	0.31846
lcl|NC_003116.1_cds_WP_002231979.1_927	0.271969	0.680748	0.31272
lcl|NC_003116.1_cds_WP_002231983.1_931	0.282083	0.639296	0.331235
lcl|NC_003116.1_cds_WP_002231985.1_933	0.272109	0.630476	0.331356
lcl|NC_003116.1_cds_WP_002231986.1_934	0.256586	0.507883	0.312124
lcl|NC_003116.1_cds_WP_002231988.1_937	0.280766	0.621245	0.343809
lcl|NC_003116.1_cds_WP_002231989.1_939	0.222427	0.402378	0.311224
lcl|NC_003116.1_cds_WP_002231990.1_942	0.261745	0.620468	0.318656
lcl|NC_003116.1_cds_WP_002231994.1_946	0.230188	0.445087	0.3211
lcl|NC_003116.1_cds_WP_002232040.1_1003	0.227231	0.487886	0.318156
lcl|NC_003116.1_cds_WP_002232044.1_1012	0.180629	0.295999	0.313077
lcl|NC_003116.1_cds_WP_002232086.1_1074	0.281021	0.655295	0.325267
lcl|NC_003116.1_cds_WP_002232122.1_866	0.25515	0.566933	0.320836
lcl|NC_003116.1_cds_WP_002232149.1_919	0.175939	0.272198	0.292596
lcl|NC_003116.1_cds_WP_002232242.1_178	0.206572	0.34838	0.299705
lcl|NC_003116.1_cds_WP_002232366.1_1350	0.232316	0.464972	0.312793
lcl|NC_003116.1_cds_WP_002232388.1_1389	0.21638	0.278043	0.316174
lcl|NC_003116.1_cds_WP_002232418.1_1415	0.255209	0.480666	0.331548
lcl|NC_003116.1_cds_WP_002232472.1_1487	0.282302	0.600085	0.343306
lcl|NC_003116.1_cds_WP_002232488.1_1508	0.269659	0.579452	0.326815
lcl|NC_003116.1_cds_WP_002232489.1_1509	0.265054	0.617696	0.334184
lcl|NC_003116.1_cds_WP_002232492.1_1514	0.245142	0.461615	0.325455
lcl|NC_003116.1_cds_WP_002232543.1_1561	0.291942	0.629347	0.336087
lcl|NC_003116.1_cds_WP_002232563.1_1588	0.273866	0.583904	0.334638
lcl|NC_003116.1_cds_WP_002232579.1_1617	0.256111	0.525898	0.324871
lcl|NC_003116.1_cds_WP_002232580.1_1618	0.261655	0.520344	0.332619
lcl|NC_003116.1_cds_WP_002232653.1_1721	0.248543	0.336323	0.335489
lcl|NC_003116.1_cds_WP_002232836.1_2238	0.224268	0.379896	0.314402
lcl|NC_003116.1_cds_WP_002232903.1_2142	0.240306	0.4845	0.334389
lcl|NC_003116.1_cds_WP_002232977.1_739	0.218466	0.405688	0.321587
lcl|NC_003116.1_cds_WP_002232978.1_737	0.28134	0.627998	0.323408
lcl|NC_003116.1_cds_WP_002232981.1_727	0.264802	0.53085	0.327458
lcl|NC_003116.1_cds_WP_002233038.1_635	0.269089	0.552894	0.318263
lcl|NC_003116.1_cds_WP_002233040.1_634	0.192588	0.340516	0.302805
lcl|NC_003116.1_cds_WP_002233042.1_632	0.273844	0.570859	0.341515
lcl|NC_003116.1_cds_WP_002233044.1_631	0.213695	0.397992	0.308554
lcl|NC_003116.1_cds_WP_002233094.1_574	0.235607	0.415336	0.326554
lcl|NC_003116.1_cds_WP_002233157.1_497	0.229419	0.316011	0.300043
lcl|NC_003116.1_cds_WP_002233159.1_493	0.194259	0.308204	0.298232
lcl|NC_003116.1_cds_WP_002233187.1_462	0.250391	0.55857	0.315922
lcl|NC_003116.1_cds_WP_002233231.1_395	0.305735	0.646068	0.337526
lcl|NC_003116.1_cds_WP_002233242.1_368	0.244012	0.456778	0.321196
lcl|NC_003116.1_cds_WP_002233247.1_360	0.272324	0.583603	0.332815
lcl|NC_003116.1_cds_WP_002233282.1_243	0.254776	0.462556	0.349176
lcl|NC_003116.1_cds_WP_002233319.1_228	0.230891	0.430621	0.311933
lcl|NC_003116.1_cds_WP_002233320.1_232	0.248417	0.491461	0.324893
lcl|NC_003116.1_cds_WP_002233354.1_297	0.258594	0.604605	0.326339
lcl|NC_003116.1_cds_WP_002233385.1_188	0.238381	0.561089	0.325933
lcl|NC_003116.1_cds_WP_002233407.1_160	0.239523	0.449691	0.316609
lcl|NC_003116.1_cds_WP_002233449.1_15	0.279576	0.594853	0.337497
lcl|NC_003116.1_cds_WP_002233503.1_2361	0.19455	0.352871	0.293429
lcl|NC_003116.1_cds_WP_002233513.1_2333	0.245122	0.477265	0.318082
lcl|NC_003116.1_cds_WP_002233526.1_2315	0.181763	0.266876	0.287678
lcl|NC_003116.1_cds_WP_002233565.1_2248	0.254529	0.572384	0.328949
lcl|NC_003116.1_cds_WP_002233618.1_818	0.314192	0.645804	0.364772
lcl|NC_003116.1_cds_WP_002233621.1_827	0.283311	0.641623	0.346346
lcl|NC_003116.1_cds_WP_002233625.1_833	0.260767	0.53054	0.316986
lcl|NC_003116.1_cds_WP_002233705.1_995	0.229754	0.385847	0.313877
lcl|NC_003116.1_cds_WP_002233765.1_1262	0.290259	0.597124	0.360214
lcl|NC_003116.1_cds_WP_002233765.1_2168	0.290259	0.597124	0.360214
lcl|NC_003116.1_cds_WP_002233783.1_2021	0.253186	0.476174	0.323779
lcl|NC_003116.1_cds_WP_002233820.1_1342	0.281927	0.673704	0.316746
lcl|NC_003116.1_cds_WP_002233863.1_1419	0.24902	0.422801	0.329921
lcl|NC_003116.1_cds_WP_002233919.1_1533	0.259369	0.551324	0.337559
lcl|NC_003116.1_cds_WP_002233921.1_1536	0.279265	0.586835	0.336349
lcl|NC_003116.1_cds_WP_002233922.1_1537	0.272165	0.527173	0.333272
lcl|NC_003116.1_cds_WP_002233923.1_1538	0.248131	0.469533	0.324236
lcl|NC_003116.1_cds_WP_002233924.1_1539	0.253789	0.567297	0.326583
lcl|NC_003116.1_cds_WP_002233939.1_1563	0.27112	0.490084	0.335975
lcl|NC_003116.1_cds_WP_002233970.1_1619	0.258895	0.473947	0.341622
lcl|NC_003116.1_cds_WP_002234037.1_1760	0.283986	0.54511	0.355533
lcl|NC_003116.1_cds_WP_002234046.1_1779	0.268167	0.578325	0.318647
lcl|NC_003116.1_cds_WP_002234139.1_1972	0.264634	0.503685	0.337271
lcl|NC_003116.1_cds_WP_002234140.1_1973	0.256955	0.596704	0.334042
lcl|NC_003116.1_cds_WP_002234162.1_2073	0.27293	0.553449	0.345012
lcl|NC_003116.1_cds_WP_002234194.1_559	0.21273	0.397678	0.302889
lcl|NC_003116.1_cds_WP_002234311.1_625	0.266185	0.538879	0.335998
lcl|NC_003116.1_cds_WP_002234312.1_624	0.263378	0.567723	0.321148
lcl|NC_003116.1_cds_WP_002234366.1_452	0.194527	0.442907	0.29469
lcl|NC_003116.1_cds_WP_002234367.1_451	0.2077	0.288237	0.30649
lcl|NC_003116.1_cds_WP_002234391.1_387	0.187839	0.317889	0.299539
lcl|NC_003116.1_cds_WP_002234479.1_55	0.293279	0.675423	0.337777
lcl|NC_003116.1_cds_WP_002234597.1_1233	0.221325	0.444917	0.311667
lcl|NC_003116.1_cds_WP_002234600.1_1225	0.234899	0.486804	0.305148
lcl|NC_003116.1_cds_WP_002234607.1_1212	0.286721	0.687844	0.321296
lcl|NC_003116.1_cds_WP_002234612.1_1207	0.238261	0.427325	0.328193
lcl|NC_003116.1_cds_WP_002234680.1_2320	0.215945	0.360243	0.316667
lcl|NC_003116.1_cds_WP_002234721.1_923	0.172695	0.272739	0.288711
lcl|NC_003116.1_cds_WP_002234830.1_1319	0.288374	0.550567	0.341834
lcl|NC_003116.1_cds_WP_002234862.1_1292	0.318967	0.536637	0.376095
lcl|NC_003116.1_cds_WP_002234869.1_1424	0.254613	0.508355	0.321534
lcl|NC_003116.1_cds_WP_002234916.1_1532	0.289233	0.586336	0.338686
lcl|NC_003116.1_cds_WP_002235010.1_1774	0.25673	0.531129	0.324223
lcl|NC_003116.1_cds_WP_002235024.1_1812	0.27159	0.596692	0.320624
lcl|NC_003116.1_cds_WP_002235070.1_1942	0.240241	0.470313	0.331787
lcl|NC_003116.1_cds_WP_002235071.1_1943	0.236821	0.501033	0.313756
lcl|NC_003116.1_cds_WP_002235078.1_1965	0.269949	0.607732	0.316632
lcl|NC_003116.1_cds_WP_002235079.1_1971	0.261563	0.595113	0.329281
lcl|NC_003116.1_cds_WP_002235080.1_1981	0.267338	0.531539	0.338527
lcl|NC_003116.1_cds_WP_002235162.1_688	0.266925	0.496299	0.331249
lcl|NC_003116.1_cds_WP_002235259.1_461	0.284323	0.683925	0.321059
lcl|NC_003116.1_cds_WP_002235294.1_336	0.213436	0.266863	0.32811
lcl|NC_003116.1_cds_WP_002235309.1_241	0.190776	0.31508	0.297215
lcl|NC_003116.1_cds_WP_002235371.1_123	0.220588	0.364534	0.323475
lcl|NC_003116.1_cds_WP_002235486.1_2294	0.237621	0.498704	0.328754
lcl|NC_003116.1_cds_WP_002235591.1_957	0.245197	0.494538	0.322254
lcl|NC_003116.1_cds_WP_002235611.1_996	0.2329	0.379866	0.332627
lcl|NC_003116.1_cds_WP_002235737.1_1357	0.273845	0.653404	0.333916
lcl|NC_003116.1_cds_WP_002235741.1_1369	0.236228	0.497623	0.314551
lcl|NC_003116.1_cds_WP_002235813.1_1490	0.299651	0.50106	0.337291
lcl|NC_003116.1_cds_WP_002235817.1_1499	0.217241	0.460939	0.306918
lcl|NC_003116.1_cds_WP_002235823.1_1510	0.283708	0.655892	0.331682
lcl|NC_003116.1_cds_WP_002235866.1_1629	0.26759	0.49762	0.347317
lcl|NC_003116.1_cds_WP_002235901.1_1703	0.270469	0.579413	0.329268
lcl|NC_003116.1_cds_WP_002235924.1_880	0.240489	0.504514	0.317056
lcl|NC_003116.1_cds_WP_002235925.1_881	0.250463	0.468552	0.33708
lcl|NC_003116.1_cds_WP_002236088.1_747	0.210294	0.339346	0.312849
lcl|NC_003116.1_cds_WP_002236175.1_571	0.291149	0.670903	0.343894
lcl|NC_003116.1_cds_WP_002236266.1_247	0.281564	0.67029	0.337512
lcl|NC_003116.1_cds_WP_002236271.1_256	0.298797	0.64521	0.338689
lcl|NC_003116.1_cds_WP_002236572.1_208	0.251469	0.479684	0.333838
lcl|NC_003116.1_cds_WP_002236574.1_192	0.250487	0.551772	0.324807
lcl|NC_003116.1_cds_WP_002236574.1_205	0.250487	0.551772	0.324807
lcl|NC_003116.1_cds_WP_002236576.1_203	0.176863	0.274406	0.288401
lcl|NC_003116.1_cds_WP_002236577.1_202	0.186706	0.269218	0.295547
lcl|NC_003116.1_cds_WP_002236578.1_201	0.179873	0.266401	0.29284
lcl|NC_003116.1_cds_WP_002236579.1_200	0.202877	0.280675	0.307277
lcl|NC_003116.1_cds_WP_002236580.1_199	0.204512	0.320451	0.316299
lcl|NC_003116.1_cds_WP_002236581.1_198	0.229201	0.408045	0.329706
lcl|NC_003116.1_cds_WP_002236582.1_197	0.219366	0.399756	0.320105
lcl|NC_003116.1_cds_WP_002236588.1_182	0.284772	0.667899	0.329017
lcl|NC_003116.1_cds_WP_002236599.1_154	0.180098	0.2971	0.31173
lcl|NC_003116.1_cds_WP_002236600.1_147	0.265588	0.500575	0.343784
lcl|NC_003116.1_cds_WP_002236604.1_137	0.230819	0.403619	0.319224
lcl|NC_003116.1_cds_WP_002236612.1_80	0.255234	0.465909	0.341942
lcl|NC_003116.1_cds_WP_002236613.1_77	0.266433	0.601307	0.318141
lcl|NC_003116.1_cds_WP_002236616.1_71	0.245566	0.474766	0.320481
lcl|NC_003116.1_cds_WP_002236650.1_2420	0.271548	0.586822	0.321415
lcl|NC_003116.1_cds_WP_002236654.1_2412	0.276018	0.605936	0.340614
lcl|NC_003116.1_cds_WP_002236655.1_2411	0.235966	0.419987	0.327776
lcl|NC_003116.1_cds_WP_002236656.1_2410	0.266173	0.622205	0.326109
lcl|NC_003116.1_cds_WP_002236659.1_2408	0.27064	0.530129	0.321841
lcl|NC_003116.1_cds_WP_002236660.1_2407	0.270689	0.610902	0.32798
lcl|NC_003116.1_cds_WP_002236662.1_2405	0.240247	0.552554	0.297576
lcl|NC_003116.1_cds_WP_002236663.1_2404	0.270455	0.609619	0.31761
lcl|NC_003116.1_cds_WP_002236670.1_2370	0.244666	0.476726	0.316269
lcl|NC_003116.1_cds_WP_002236693.1_2295	0.26693	0.551192	0.33055
lcl|NC_003116.1_cds_WP_002236706.1_2262	0.21086	0.374899	0.306525
lcl|NC_003116.1_cds_WP_002236710.1_2256	0.255718	0.517052	0.338103
lcl|NC_003116.1_cds_WP_002236711.1_2253	0.272027	0.488058	0.34891
lcl|NC_003116.1_cds_WP_002236713.1_2247	0.268909	0.559025	0.341955
lcl|NC_003116.1_cds_WP_002236718.1_2224	0.246059	0.516158	0.320961
lcl|NC_003116.1_cds_WP_002236738.1_2150	0.219747	0.425092	0.313145
lcl|NC_003116.1_cds_WP_002236744.1_771	0.256	0.54031	0.331122
lcl|NC_003116.1_cds_WP_002236745.1_772	0.272612	0.628802	0.334359
lcl|NC_003116.1_cds_WP_002236746.1_773	0.260134	0.566832	0.317638
lcl|NC_003116.1_cds_WP_002236760.1_806	0.279082	0.577905	0.360881
lcl|NC_003116.1_cds_WP_002236764.1_820	0.266999	0.521879	0.335078
lcl|NC_003116.1_cds_WP_002236783.1_869	0.241157	0.483831	0.317201
lcl|NC_003116.1_cds_WP_002236809.1_947	0.283345	0.63316	0.319326
lcl|NC_003116.1_cds_WP_002236810.1_950	0.26793	0.653764	0.327088
lcl|NC_003116.1_cds_WP_002236811.1_956	0.238113	0.396859	0.330734
lcl|NC_003116.1_cds_WP_002236813.1_960	0.295455	0.601738	0.357327
lcl|NC_003116.1_cds_WP_002236814.1_961	0.268087	0.617393	0.329056
lcl|NC_003116.1_cds_WP_002236842.1_1045	0.248228	0.462612	0.329361
lcl|NC_003116.1_cds_WP_002236843.1_1046	0.231192	0.447428	0.320119
lcl|NC_003116.1_cds_WP_002236844.1_1052	0.243834	0.507913	0.319216
lcl|NC_003116.1_cds_WP_002236845.1_1053	0.276661	0.591549	0.350293
lcl|NC_003116.1_cds_WP_002236853.1_1079	0.296911	0.655448	0.352052
lcl|NC_003116.1_cds_WP_002236863.1_1124	0.25299	0.536012	0.327505
lcl|NC_003116.1_cds_WP_002236871.1_1139	0.248254	0.437176	0.326088
lcl|NC_003116.1_cds_WP_002236872.1_1146	0.263479	0.538704	0.336346
lcl|NC_003116.1_cds_WP_002236873.1_1147	0.271705	0.565159	0.351041
lcl|NC_003116.1_cds_WP_002236876.1_1164	0.168011	0.24436	0.295093
lcl|NC_003116.1_cds_WP_002236895.1_1199	0.23634	0.435111	0.327648
lcl|NC_003116.1_cds_WP_002236898.1_1205	0.214026	0.385829	0.304351
lcl|NC_003116.1_cds_WP_002236907.1_706	0.286458	0.612104	0.341525
lcl|NC_003116.1_cds_WP_002236920.1_1282	0.254229	0.505078	0.338547
lcl|NC_003116.1_cds_WP_002236920.1_1404	0.254229	0.505078	0.338547
lcl|NC_003116.1_cds_WP_002236925.1_1296	0.242084	0.41977	0.32982
lcl|NC_003116.1_cds_WP_002236926.1_1303	0.284076	0.61737	0.338827
lcl|NC_003116.1_cds_WP_002236949.1_1387	0.277966	0.651546	0.324462
lcl|NC_003116.1_cds_WP_002236978.1_1459	0.307543	0.666027	0.350981
lcl|NC_003116.1_cds_WP_002236991.1_1483	0.259008	0.550369	0.326998
lcl|NC_003116.1_cds_WP_002236992.1_1484	0.214734	0.411984	0.305771
lcl|NC_003116.1_cds_WP_002236998.1_1493	0.221212	0.373461	0.315586
lcl|NC_003116.1_cds_WP_002237004.1_1502	0.239241	0.45037	0.325857
lcl|NC_003116.1_cds_WP_002237006.1_1505	0.269682	0.560784	0.342195
lcl|NC_003116.1_cds_WP_002237007.1_1506	0.259543	0.499884	0.316459
lcl|NC_003116.1_cds_WP_002237008.1_1507	0.293528	0.627993	0.350285
lcl|NC_003116.1_cds_WP_002237017.1_1529	0.221775	0.384261	0.307398
lcl|NC_003116.1_cds_WP_002237018.1_1531	0.228359	0.408165	0.315974
lcl|NC_003116.1_cds_WP_002237044.1_1582	0.236956	0.425052	0.330488
lcl|NC_003116.1_cds_WP_002237048.1_1589	0.224396	0.449283	0.302209
lcl|NC_003116.1_cds_WP_002237049.1_1593	0.244175	0.517829	0.319094
lcl|NC_003116.1_cds_WP_002237050.1_1596	0.25147	0.540699	0.32667
lcl|NC_003116.1_cds_WP_002237068.1_1646	0.261973	0.558958	0.335234
lcl|NC_003116.1_cds_WP_002237069.1_1647	0.262262	0.513716	0.334944
lcl|NC_003116.1_cds_WP_002237070.1_1649	0.279842	0.600362	0.343429
lcl|NC_003116.1_cds_WP_002237077.1_1656	0.261317	0.561956	0.339669
lcl|NC_003116.1_cds_WP_002237080.1_1670	0.29179	0.601977	0.347081
lcl|NC_003116.1_cds_WP_002237086.1_1685	0.303624	0.668169	0.351691
lcl|NC_003116.1_cds_WP_002237089.1_1693	0.205578	0.347276	0.316767
lcl|NC_003116.1_cds_WP_002237090.1_1694	0.263612	0.625248	0.315729
lcl|NC_003116.1_cds_WP_002237094.1_1699	0.306432	0.740907	0.339226
lcl|NC_003116.1_cds_WP_002237096.1_1705	0.219176	0.304608	0.326229
lcl|NC_003116.1_cds_WP_002237129.1_575	0.282623	0.592895	0.347746
lcl|NC_003116.1_cds_WP_002237153.1_852	0.201852	0.257716	0.321268
lcl|NC_003116.1_cds_WP_002237171.1_1777	0.229962	0.472751	0.306366
lcl|NC_003116.1_cds_WP_002237172.1_1778	0.208322	0.361175	0.30619
lcl|NC_003116.1_cds_WP_002237206.1_1912	0.245094	0.528589	0.313325
lcl|NC_003116.1_cds_WP_002237207.1_1913	0.262958	0.605667	0.330043
lcl|NC_003116.1_cds_WP_002237211.1_1918	0.266644	0.568334	0.329723
lcl|NC_003116.1_cds_WP_002237212.1_1922	0.234631	0.446855	0.324736
lcl|NC_003116.1_cds_WP_002237213.1_1924	0.236297	0.482035	0.323549
lcl|NC_003116.1_cds_WP_002237234.1_1995	0.322022	0.622843	0.368222
lcl|NC_003116.1_cds_WP_002237235.1_1996	0.281963	0.571535	0.331996
lcl|NC_003116.1_cds_WP_002237236.1_1997	0.252818	0.541981	0.327792
lcl|NC_003116.1_cds_WP_002237241.1_2000	0.209085	0.325099	0.320487
lcl|NC_003116.1_cds_WP_002237243.1_2011	0.235567	0.425573	0.317436
lcl|NC_003116.1_cds_WP_002237246.1_2015	0.232153	0.421965	0.321589
lcl|NC_003116.1_cds_WP_002237247.1_2018	0.225624	0.419649	0.314422
lcl|NC_003116.1_cds_WP_002237250.1_2028	0.251783	0.442765	0.338238
lcl|NC_003116.1_cds_WP_002237252.1_2037	0.243075	0.43031	0.353356
lcl|NC_003116.1_cds_WP_002237254.1_2042	0.240072	0.38441	0.327892
lcl|NC_003116.1_cds_WP_002237255.1_2045	0.256248	0.562323	0.328679
lcl|NC_003116.1_cds_WP_002237256.1_2046	0.266735	0.564621	0.348863
lcl|NC_003116.1_cds_WP_002237262.1_2067	0.192011	0.349823	0.30033
lcl|NC_003116.1_cds_WP_002237263.1_2070	0.243575	0.422329	0.322277
lcl|NC_003116.1_cds_WP_002237271.1_2088	0.297961	0.704218	0.341588
lcl|NC_003116.1_cds_WP_002237277.1_2099	0.207415	0.460901	0.310048
lcl|NC_003116.1_cds_WP_002237287.1_2111	0.25072	0.500765	0.327289
lcl|NC_003116.1_cds_WP_002237303.1_2133	0.257689	0.535539	0.322513
lcl|NC_003116.1_cds_WP_002237362.1_485	0.248191	0.471171	0.320866
lcl|NC_003116.1_cds_WP_002237370.1_470	0.275083	0.663697	0.311498
lcl|NC_003116.1_cds_WP_002237377.1_454	0.201775	0.297279	0.302242
lcl|NC_003116.1_cds_WP_002237378.1_450	0.183248	0.27255	0.292172
lcl|NC_003116.1_cds_WP_002237381.1_434	0.224693	0.45182	0.315426
lcl|NC_003116.1_cds_WP_002237386.1_410	0.266623	0.597296	0.318666
lcl|NC_003116.1_cds_WP_002237387.1_404	0.249283	0.439816	0.341191
lcl|NC_003116.1_cds_WP_002237388.1_399	0.257192	0.551577	0.324465
lcl|NC_003116.1_cds_WP_002237399.1_321	0.240731	0.530481	0.314953
lcl|NC_003116.1_cds_WP_002237423.1_257	0.269628	0.604218	0.322906
lcl|NC_003116.1_cds_WP_002237430.1_227	0.2963	0.611964	0.356667
lcl|NC_003116.1_cds_WP_002237432.1_225	0.265731	0.563539	0.328509
lcl|NC_003116.1_cds_WP_002237644.1_962	0.2541	0.533041	0.321003
lcl|NC_003116.1_cds_WP_002237777.1_892	0.302889	0.690878	0.32823
lcl|NC_003116.1_cds_WP_002237810.1_1029	0.240783	0.514351	0.313372
lcl|NC_003116.1_cds_WP_002237927.1_1462	0.261589	0.564959	0.324944
lcl|NC_003116.1_cds_WP_002237958.1_1528	0.196765	0.33538	0.299523
lcl|NC_003116.1_cds_WP_002238314.1_722	0.242589	0.463767	0.330936
lcl|NC_003116.1_cds_WP_002238642.1_21	0.200948	0.294287	0.30429
lcl|NC_003116.1_cds_WP_002238678.1_2351	0.269576	0.6184	0.328186
lcl|NC_003116.1_cds_WP_002238953.1_997	0.271257	0.595637	0.321124
lcl|NC_003116.1_cds_WP_002238979.1_1115	0.269432	0.553446	0.336898
lcl|NC_003116.1_cds_WP_002238995.1_1187	0.272985	0.514039	0.330372
lcl|NC_003116.1_cds_WP_002239049.1_1317	0.25877	0.498856	0.298643
lcl|NC_003116.1_cds_WP_002239219.1_2072	0.271046	0.541051	0.340904
lcl|NC_003116.1_cds_WP_002239329.1_581	0.305764	0.695589	0.352893
lcl|NC_003116.1_cds_WP_002239407.1_195	0.276087	0.598382	0.338049
lcl|NC_003116.1_cds_WP_002239423.1_158	0.278152	0.489927	0.351646
lcl|NC_003116.1_cds_WP_002239454.1_89	0.279746	0.642872	0.327171
lcl|NC_003116.1_cds_WP_002239495.1_2366	0.265287	0.565633	0.33046
lcl|NC_003116.1_cds_WP_002239760.1_1578	0.211004	0.412542	0.301023
lcl|NC_003116.1_cds_WP_002239771.1_1467	0.255712	0.401618	0.340562
lcl|NC_003116.1_cds_WP_002239786.1_1460	0.283007	0.586906	0.335052
lcl|NC_003116.1_cds_WP_002239809.1_1466	0.250054	0.595412	0.305022
lcl|NC_003116.1_cds_WP_002239813.1_776	0.2543	0.552096	0.316551
lcl|NC_003116.1_cds_WP_002239832.1_748	0.218977	0.381176	0.314955
lcl|NC_003116.1_cds_WP_002239883.1_1895	0.276237	0.634675	0.331463
lcl|NC_003116.1_cds_WP_002239983.1_2110	0.300527	0.669997	0.348666
lcl|NC_003116.1_cds_WP_002239986.1_2112	0.257976	0.563297	0.324428
lcl|NC_003116.1_cds_WP_002240088.1_484	0.260267	0.481634	0.313888
lcl|NC_003116.1_cds_WP_002240123.1_348	0.229242	0.549449	0.317816
lcl|NC_003116.1_cds_WP_002240146.1_288	0.268153	0.604846	0.329001
lcl|NC_003116.1_cds_WP_002240238.1_2430	0.286311	0.55856	0.362003
lcl|NC_003116.1_cds_WP_002240310.1_1800	0.273955	0.609877	0.328684
lcl|NC_003116.1_cds_WP_002240407.1_994	0.237966	0.4485	0.328289
lcl|NC_003116.1_cds_WP_002240432.1_1097	0.338755	0.607852	0.366862
lcl|NC_003116.1_cds_WP_002240448.1_1180	0.273057	0.626796	0.330134
lcl|NC_003116.1_cds_WP_002240500.1_1365	0.244095	0.50772	0.321794
lcl|NC_003116.1_cds_WP_002240501.1_1368	0.244503	0.441344	0.323119
lcl|NC_003116.1_cds_WP_002240520.1_1489	0.1771	0.326807	0.283034
lcl|NC_003116.1_cds_WP_002240726.1_1261	0.248401	0.488273	0.325417
lcl|NC_003116.1_cds_WP_002240726.1_2167	0.248401	0.488273	0.325417
lcl|NC_003116.1_cds_WP_002240822.1_463	0.254814	0.54892	0.328274
lcl|NC_003116.1_cds_WP_002241315.1_1010	0.245546	0.485494	0.333303
lcl|NC_003116.1_cds_WP_002241400.1_1176	0.255219	0.539434	0.353386
lcl|NC_003116.1_cds_WP_002241449.1_1208	0.264277	0.593669	0.331271
lcl|NC_003116.1_cds_WP_002241612.1_1544	0.279625	0.699813	0.329553
lcl|NC_003116.1_cds_WP_002241750.1_1787	0.274049	0.636887	0.337576
lcl|NC_003116.1_cds_WP_002241757.1_567	0.199367	0.371856	0.308039
lcl|NC_003116.1_cds_WP_002241765.1_1811	0.288978	0.678001	0.336757
lcl|NC_003116.1_cds_WP_002241856.1_2085	0.23349	0.402897	0.335354
lcl|NC_003116.1_cds_WP_002241958.1_609	0.185677	0.336718	0.296766
lcl|NC_003116.1_cds_WP_002242218.1_24	0.239429	0.280612	0.320179
lcl|NC_003116.1_cds_WP_002242291.1_2375	0.240124	0.423993	0.32412
lcl|NC_003116.1_cds_WP_002242316.1_2245	0.266787	0.453199	0.337155
lcl|NC_003116.1_cds_WP_002242408.1_944	0.272751	0.485644	0.358721
lcl|NC_003116.1_cds_WP_002242827.1_1788	0.218547	0.402862	0.316586
lcl|NC_003116.1_cds_WP_002242868.1_1885	0.229962	0.404352	0.327517
lcl|NC_003116.1_cds_WP_002243123.1_392	0.266562	0.570906	0.331183
lcl|NC_003116.1_cds_WP_002243132.1_394	0.271292	0.514091	0.3345
lcl|NC_003116.1_cds_WP_002243193.1_90	0.297216	0.674177	0.337552
lcl|NC_003116.1_cds_WP_002243579.1_1608	0.300853	0.580685	0.354612
lcl|NC_003116.1_cds_WP_002243598.1_1660	0.178796	0.283928	0.305248
lcl|NC_003116.1_cds_WP_002243706.1_1762	0.26362	0.495048	0.334347
lcl|NC_003116.1_cds_WP_002243792.1_769	0.261343	0.625396	0.330379
lcl|NC_003116.1_cds_WP_002243879.1_2439	0.208116	0.343227	0.312055
lcl|NC_003116.1_cds_WP_002244020.1_765	0.296449	0.406189	0.367223
lcl|NC_003116.1_cds_WP_002244133.1_1452	0.205866	0.363114	0.303821
lcl|NC_003116.1_cds_WP_002244315.1_579	0.233024	0.351339	0.333009
lcl|NC_003116.1_cds_WP_002244538.1_1248	0.17863	0.24518	0.292308
lcl|NC_003116.1_cds_WP_002244651.1_2069	0.230192	0.401645	0.319146
lcl|NC_003116.1_cds_WP_002244892.1_873	0.29332	0.667071	0.346748
lcl|NC_003116.1_cds_WP_002244926.1_1072	0.26642	0.611851	0.318474
lcl|NC_003116.1_cds_WP_002244995.1_1250	0.270863	0.607748	0.319468
lcl|NC_003116.1_cds_WP_002245102.1_1734	0.232119	0.420701	0.313225
lcl|NC_003116.1_cds_WP_002245104.1_1738	0.260682	0.425365	0.324521
lcl|NC_003116.1_cds_WP_002245122.1_1848	0.264548	0.482541	0.334492
lcl|NC_003116.1_cds_WP_002245219.1_558	0.307499	0.688722	0.33643
lcl|NC_003116.1_cds_WP_002245320.1_1126	0.258308	0.554484	0.33257
lcl|NC_003116.1_cds_WP_002245445.1_2293	0.237502	0.490428	0.307418
lcl|NC_003116.1_cds_WP_002245603.1_1439	0.256896	0.58232	0.311789
lcl|NC_003116.1_cds_WP_002245604.1_1440	0.264769	0.511231	0.330537
lcl|NC_003116.1_cds_WP_002245642.1_1820	0.262092	0.496444	0.341405
lcl|NC_003116.1_cds_WP_002245660.1_2317	0.183945	0.325041	0.303406
lcl|NC_003116.1_cds_WP_002245726.1_458	0.23539	0.410277	0.314225
lcl|NC_003116.1_cds_WP_002245780.1_187	0.262112	0.542303	0.333172
lcl|NC_003116.1_cds_WP_002245782.1_172	0.254411	0.624734	0.304458
lcl|NC_003116.1_cds_WP_002245783.1_168	0.271261	0.55468	0.341252
lcl|NC_003116.1_cds_WP_002245784.1_167	0.243505	0.506531	0.330834
lcl|NC_003116.1_cds_WP_002245785.1_165	0.260082	0.485623	0.331956
lcl|NC_003116.1_cds_WP_002245790.1_157	0.235704	0.419751	0.30969
lcl|NC_003116.1_cds_WP_002245792.1_99	0.28502	0.670709	0.334494
lcl|NC_003116.1_cds_WP_002245794.1_97	0.265498	0.540171	0.334585
lcl|NC_003116.1_cds_WP_002245797.1_92	0.295281	0.669194	0.341401
lcl|NC_003116.1_cds_WP_002245798.1_91	0.286166	0.657017	0.33594
lcl|NC_003116.1_cds_WP_002245803.1_83	0.294567	0.683994	0.321801
lcl|NC_003116.1_cds_WP_002245810.1_51	0.242892	0.399863	0.331346
lcl|NC_003116.1_cds_WP_002245813.1_49	0.266306	0.541051	0.327514
lcl|NC_003116.1_cds_WP_002245816.1_47	0.279911	0.61202	0.307014
lcl|NC_003116.1_cds_WP_002245818.1_42	0.276418	0.544029	0.344138
lcl|NC_003116.1_cds_WP_002245820.1_34	0.248852	0.482241	0.30186
lcl|NC_003116.1_cds_WP_002245825.1_13	0.273335	0.566305	0.335065
lcl|NC_003116.1_cds_WP_002245826.1_10	0.26704	0.564212	0.341312
lcl|NC_003116.1_cds_WP_002245827.1_9	0.266563	0.553829	0.328866
lcl|NC_003116.1_cds_WP_002245830.1_2	0.250557	0.554491	0.323759
lcl|NC_003116.1_cds_WP_002245831.1_1	0.287061	0.586668	0.334958
lcl|NC_003116.1_cds_WP_002245832.1_2438	0.240922	0.494112	0.333164
lcl|NC_003116.1_cds_WP_002245833.1_2437	0.240309	0.539437	0.322149
lcl|NC_003116.1_cds_WP_002245835.1_2431	0.270943	0.624172	0.325478
lcl|NC_003116.1_cds_WP_002245836.1_2428	0.274223	0.604618	0.320315
lcl|NC_003116.1_cds_WP_002245838.1_2422	0.266554	0.568557	0.326748
lcl|NC_003116.1_cds_WP_002245839.1_2421	0.279023	0.606833	0.335928
lcl|NC_003116.1_cds_WP_002245844.1_2409	0.218367	0.411333	0.300453
lcl|NC_003116.1_cds_WP_002245846.1_2402	0.235113	0.483707	0.331098
lcl|NC_003116.1_cds_WP_002245848.1_2398	0.278875	0.564934	0.346161
lcl|NC_003116.1_cds_WP_002245849.1_2397	0.251859	0.493153	0.324341
lcl|NC_003116.1_cds_WP_002245852.1_2376	0.259923	0.525573	0.3207
lcl|NC_003116.1_cds_WP_002245853.1_2373	0.243304	0.572148	0.312568
lcl|NC_003116.1_cds_WP_002245857.1_2355	0.24213	0.477187	0.318507
lcl|NC_003116.1_cds_WP_002245858.1_2349	0.236497	0.486581	0.313467
lcl|NC_003116.1_cds_WP_002245860.1_2339	0.270764	0.612087	0.322084
lcl|NC_003116.1_cds_WP_002245862.1_2335	0.267799	0.563312	0.338128
lcl|NC_003116.1_cds_WP_002245865.1_2326	0.268237	0.638467	0.329932
lcl|NC_003116.1_cds_WP_002245866.1_2325	0.230588	0.405779	0.3254
lcl|NC_003116.1_cds_WP_002245867.1_2324	0.27991	0.512252	0.347096
lcl|NC_003116.1_cds_WP_002245869.1_2318	0.183603	0.296826	0.293146
lcl|NC_003116.1_cds_WP_002245877.1_2311	0.239549	0.430723	0.311422
lcl|NC_003116.1_cds_WP_002245878.1_2310	0.283159	0.72745	0.306106
lcl|NC_003116.1_cds_WP_002245879.1_2309	0.228387	0.49418	0.298294
lcl|NC_003116.1_cds_WP_002245894.1_2249	0.264352	0.522462	0.33701
lcl|NC_003116.1_cds_WP_002245900.1_2235	0.276776	0.620701	0.333633
lcl|NC_003116.1_cds_WP_002245902.1_2232	0.272817	0.555729	0.329164
lcl|NC_003116.1_cds_WP_002245903.1_2230	0.227315	0.48328	0.306482
lcl|NC_003116.1_cds_WP_002245904.1_2228	0.265896	0.616036	0.314487
lcl|NC_003116.1_cds_WP_002245905.1_2227	0.259429	0.524444	0.325967
lcl|NC_003116.1_cds_WP_002245907.1_2223	0.240877	0.520402	0.321907
lcl|NC_003116.1_cds_WP_002245908.1_2221	0.2334	0.462577	0.296883
lcl|NC_003116.1_cds_WP_002245909.1_2218	0.203949	0.292388	0.307415
lcl|NC_003116.1_cds_WP_002245910.1_2217	0.230624	0.426141	0.290229
lcl|NC_003116.1_cds_WP_002245911.1_2216	0.264914	0.643323	0.320928
lcl|NC_003116.1_cds_WP_002245912.1_2215	0.254301	0.481345	0.323642
lcl|NC_003116.1_cds_WP_002245914.1_2209	0.261377	0.543715	0.314588
lcl|NC_003116.1_cds_WP_002245918.1_2188	0.303313	0.634619	0.360349
lcl|NC_003116.1_cds_WP_002245919.1_2187	0.237103	0.579781	0.323429
lcl|NC_003116.1_cds_WP_002245920.1_2186	0.225643	0.440821	0.318414
lcl|NC_003116.1_cds_WP_002245921.1_2181	0.211446	0.366646	0.309733
lcl|NC_003116.1_cds_WP_002245934.1_768	0.260236	0.575997	0.330756
lcl|NC_003116.1_cds_WP_002245963.1_835	0.262916	0.575795	0.333725
lcl|NC_003116.1_cds_WP_002245967.1_1709	0.288038	0.660183	0.336026
lcl|NC_003116.1_cds_WP_002245969.1_1704	0.295115	0.634243	0.344091
lcl|NC_003116.1_cds_WP_002245970.1_1696	0.233865	0.414186	0.329315
lcl|NC_003116.1_cds_WP_002245974.1_1687	0.280324	0.500191	0.341355
lcl|NC_003116.1_cds_WP_002245975.1_1682	0.291264	0.731594	0.332375
lcl|NC_003116.1_cds_WP_002245979.1_1668	0.281165	0.619321	0.330174
lcl|NC_003116.1_cds_WP_002245980.1_1665	0.236596	0.474944	0.314916
lcl|NC_003116.1_cds_WP_002245981.1_1661	0.282441	0.634908	0.337647
lcl|NC_003116.1_cds_WP_002245982.1_1659	0.261783	0.531589	0.323168
lcl|NC_003116.1_cds_WP_002245983.1_1655	0.260569	0.515833	0.331771
lcl|NC_003116.1_cds_WP_002245985.1_1653	0.27316	0.562414	0.359362
lcl|NC_003116.1_cds_WP_002245987.1_1648	0.237207	0.36358	0.318152
lcl|NC_003116.1_cds_WP_002245989.1_1641	0.286948	0.667214	0.333923
lcl|NC_003116.1_cds_WP_002245990.1_1640	0.204356	0.27164	0.306598
lcl|NC_003116.1_cds_WP_002245991.1_1639	0.225462	0.429651	0.317752
lcl|NC_003116.1_cds_WP_002245994.1_1633	0.281974	0.555974	0.342265
lcl|NC_003116.1_cds_WP_002245995.1_1623	0.222232	0.429126	0.317265
lcl|NC_003116.1_cds_WP_002245997.1_1621	0.265475	0.53485	0.334066
lcl|NC_003116.1_cds_WP_002245999.1_1600	0.22753	0.408692	0.30672
lcl|NC_003116.1_cds_WP_002246000.1_1599	0.23472	0.454687	0.308642
lcl|NC_003116.1_cds_WP_002246001.1_1594	0.191802	0.266996	0.303048
lcl|NC_003116.1_cds_WP_002246006.1_840	0.277979	0.378275	0.331493
lcl|NC_003116.1_cds_WP_002246008.1_841	0.265147	0.396283	0.33082
lcl|NC_003116.1_cds_WP_002246009.1_842	0.229367	0.29261	0.31893
lcl|NC_003116.1_cds_WP_002246011.1_844	0.175275	0.27773	0.303876
lcl|NC_003116.1_cds_WP_002246012.1_845	0.250554	0.456311	0.320185
lcl|NC_003116.1_cds_WP_002246013.1_846	0.318402	0.450069	0.406824
lcl|NC_003116.1_cds_WP_002246014.1_847	0.243622	0.470721	0.332655
lcl|NC_003116.1_cds_WP_002246015.1_848	0.258467	0.545514	0.322209
lcl|NC_003116.1_cds_WP_002246016.1_849	0.237946	0.398995	0.31559
lcl|NC_003116.1_cds_WP_002246017.1_850	0.226874	0.410457	0.313096
lcl|NC_003116.1_cds_WP_002246021.1_855	0.27867	0.635008	0.333044
lcl|NC_003116.1_cds_WP_002246033.1_874	0.270736	0.556183	0.327988
lcl|NC_003116.1_cds_WP_002246037.1_889	0.301023	0.676692	0.350132
lcl|NC_003116.1_cds_WP_002246038.1_893	0.246852	0.504372	0.320319
lcl|NC_003116.1_cds_WP_002246039.1_897	0.287339	0.636532	0.341872
lcl|NC_003116.1_cds_WP_002246041.1_901	0.255461	0.467485	0.319919
lcl|NC_003116.1_cds_WP_002246042.1_902	0.292055	0.638691	0.343787
lcl|NC_003116.1_cds_WP_002246043.1_903	0.286336	0.68036	0.327106
lcl|NC_003116.1_cds_WP_002246049.1_912	0.286738	0.644266	0.328976
lcl|NC_003116.1_cds_WP_002246054.1_918	0.235245	0.3976	0.312352
lcl|NC_003116.1_cds_WP_002246057.1_959	0.283772	0.617051	0.341437
lcl|NC_003116.1_cds_WP_002246064.1_980	0.248166	0.55345	0.33022
lcl|NC_003116.1_cds_WP_002246065.1_981	0.217024	0.361785	0.306644
lcl|NC_003116.1_cds_WP_002246066.1_982	0.248066	0.526432	0.321156
lcl|NC_003116.1_cds_WP_002246067.1_984	0.264362	0.462933	0.3423
lcl|NC_003116.1_cds_WP_002246070.1_1000	0.276877	0.56837	0.350375
lcl|NC_003116.1_cds_WP_002246072.1_1005	0.24232	0.513313	0.329238
lcl|NC_003116.1_cds_WP_002246073.1_1008	0.259988	0.525472	0.338575
lcl|NC_003116.1_cds_WP_002246075.1_1011	0.240843	0.380749	0.331885
lcl|NC_003116.1_cds_WP_002246076.1_1013	0.2342	0.449582	0.329208
lcl|NC_003116.1_cds_WP_002246077.1_1014	0.286467	0.565643	0.352493
lcl|NC_003116.1_cds_WP_002246078.1_1015	0.256892	0.459677	0.33577
lcl|NC_003116.1_cds_WP_002246082.1_1021	0.254427	0.472064	0.342309
lcl|NC_003116.1_cds_WP_002246084.1_1027	0.235678	0.461093	0.321828
lcl|NC_003116.1_cds_WP_002246085.1_1028	0.20258	0.365554	0.301845
lcl|NC_003116.1_cds_WP_002246087.1_1031	0.267267	0.510666	0.329805
lcl|NC_003116.1_cds_WP_002246088.1_1036	0.237593	0.393602	0.314053
lcl|NC_003116.1_cds_WP_002246090.1_1054	0.291194	0.544206	0.372541
lcl|NC_003116.1_cds_WP_002246093.1_1067	0.237749	0.452999	0.324543
lcl|NC_003116.1_cds_WP_002246094.1_1068	0.283001	0.633399	0.337168
lcl|NC_003116.1_cds_WP_002246096.1_1071	0.271874	0.592875	0.32006
lcl|NC_003116.1_cds_WP_002246097.1_1073	0.268537	0.601219	0.320947
lcl|NC_003116.1_cds_WP_002246099.1_1081	0.264305	0.591984	0.324034
lcl|NC_003116.1_cds_WP_002246101.1_1085	0.283792	0.609227	0.334295
lcl|NC_003116.1_cds_WP_002246103.1_1101	0.245729	0.512883	0.318309
lcl|NC_003116.1_cds_WP_002246105.1_1131	0.271448	0.625778	0.317883
lcl|NC_003116.1_cds_WP_002246106.1_1132	0.273088	0.52691	0.348919
lcl|NC_003116.1_cds_WP_002246107.1_1133	0.234867	0.518947	0.307197
lcl|NC_003116.1_cds_WP_002246108.1_1134	0.249729	0.541777	0.323951
lcl|NC_003116.1_cds_WP_002246109.1_1136	0.260248	0.492687	0.32624
lcl|NC_003116.1_cds_WP_002246112.1_1173	0.257608	0.433383	0.338101
lcl|NC_003116.1_cds_WP_002246113.1_1174	0.22918	0.37663	0.314994
lcl|NC_003116.1_cds_WP_002246114.1_1177	0.278363	0.461109	0.337369
lcl|NC_003116.1_cds_WP_002246115.1_1182	0.25993	0.474807	0.347517
lcl|NC_003116.1_cds_WP_002246134.1_1224	0.237107	0.491923	0.32334
lcl|NC_003116.1_cds_WP_002246154.1_1307	0.264202	0.518822	0.330062
lcl|NC_003116.1_cds_WP_002246162.1_1322	0.264856	0.440653	0.3379
lcl|NC_003116.1_cds_WP_002246163.1_1332	0.227138	0.344245	0.306372
lcl|NC_003116.1_cds_WP_002246166.1_1341	0.215005	0.381079	0.302712
lcl|NC_003116.1_cds_WP_002246167.1_1344	0.261115	0.542291	0.341869
lcl|NC_003116.1_cds_WP_002246168.1_1348	0.272842	0.546622	0.338995
lcl|NC_003116.1_cds_WP_002246169.1_1371	0.24422	0.478439	0.33064
lcl|NC_003116.1_cds_WP_002246170.1_1373	0.272415	0.526662	0.340299
lcl|NC_003116.1_cds_WP_002246172.1_1388	0.208026	0.316728	0.311441
lcl|NC_003116.1_cds_WP_002246173.1_1390	0.223328	0.354059	0.323012
lcl|NC_003116.1_cds_WP_002246174.1_1391	0.253548	0.428037	0.346403
lcl|NC_003116.1_cds_WP_002246175.1_1392	0.201432	0.355171	0.308039
lcl|NC_003116.1_cds_WP_002246195.1_1454	0.266361	0.593152	0.325182
lcl|NC_003116.1_cds_WP_002246196.1_1456	0.265277	0.582351	0.32323
lcl|NC_003116.1_cds_WP_002246197.1_1461	0.275315	0.554305	0.345624
lcl|NC_003116.1_cds_WP_002246198.1_1465	0.269377	0.559621	0.329991
lcl|NC_003116.1_cds_WP_002246199.1_1470	0.251227	0.494401	0.326016
lcl|NC_003116.1_cds_WP_002246201.1_1474	0.266248	0.616552	0.318028
lcl|NC_003116.1_cds_WP_002246206.1_1485	0.234589	0.404993	0.319285
lcl|NC_003116.1_cds_WP_002246208.1_1497	0.278252	0.555208	0.343131
lcl|NC_003116.1_cds_WP_002246209.1_1500	0.258336	0.462491	0.336065
lcl|NC_003116.1_cds_WP_002246210.1_1501	0.277088	0.47986	0.346536
lcl|NC_003116.1_cds_WP_002246224.1_1549	0.291274	0.768247	0.336503
lcl|NC_003116.1_cds_WP_002246232.1_1558	0.250738	0.4984	0.3368
lcl|NC_003116.1_cds_WP_002246233.1_1559	0.22713	0.421648	0.313395
lcl|NC_003116.1_cds_WP_002246234.1_1560	0.253007	0.576064	0.329553
lcl|NC_003116.1_cds_WP_002246235.1_1564	0.201764	0.303499	0.309522
lcl|NC_003116.1_cds_WP_002246236.1_1565	0.23034	0.475639	0.322468
lcl|NC_003116.1_cds_WP_002246238.1_1568	0.267478	0.58305	0.340413
lcl|NC_003116.1_cds_WP_002246240.1_1573	0.270868	0.619622	0.31612
lcl|NC_003116.1_cds_WP_002246241.1_1574	0.293671	0.639503	0.332287
lcl|NC_003116.1_cds_WP_002246243.1_1577	0.275385	0.599006	0.334621
lcl|NC_003116.1_cds_WP_002246244.1_1579	0.272518	0.63226	0.31842
lcl|NC_003116.1_cds_WP_002246245.1_1977	0.249347	0.485189	0.30259
lcl|NC_003116.1_cds_WP_002246249.1_1727	0.195426	0.254469	0.304228
lcl|NC_003116.1_cds_WP_002246251.1_1731	0.25724	0.600415	0.317818
lcl|NC_003116.1_cds_WP_002246252.1_1732	0.246195	0.482038	0.329057
lcl|NC_003116.1_cds_WP_002246253.1_1733	0.226324	0.499146	0.313781
lcl|NC_003116.1_cds_WP_002246258.1_1740	0.296457	0.681942	0.350507
lcl|NC_003116.1_cds_WP_002246260.1_1744	0.282581	0.693795	0.328965
lcl|NC_003116.1_cds_WP_002246265.1_1757	0.264536	0.557562	0.338372
lcl|NC_003116.1_cds_WP_002246266.1_1761	0.266333	0.503214	0.335591
lcl|NC_003116.1_cds_WP_002246270.1_1772	0.296555	0.635178	0.341695
lcl|NC_003116.1_cds_WP_002246284.1_1816	0.245992	0.478978	0.32593
lcl|NC_003116.1_cds_WP_002246285.1_1817	0.260216	0.535179	0.331577
lcl|NC_003116.1_cds_WP_002246286.1_1822	0.235309	0.473579	0.313237
lcl|NC_003116.1_cds_WP_002246287.1_1823	0.266365	0.575312	0.326456
lcl|NC_003116.1_cds_WP_002246288.1_1826	0.237605	0.476094	0.311401
lcl|NC_003116.1_cds_WP_002246289.1_1836	0.255262	0.47797	0.332924
lcl|NC_003116.1_cds_WP_002246290.1_1837	0.267766	0.655346	0.314761
lcl|NC_003116.1_cds_WP_002246293.1_1849	0.24014	0.457059	0.314114
lcl|NC_003116.1_cds_WP_002246294.1_1851	0.22666	0.446262	0.312363
lcl|NC_003116.1_cds_WP_002246295.1_1855	0.229196	0.477776	0.32371
lcl|NC_003116.1_cds_WP_002246297.1_1862	0.213312	0.357841	0.311556
lcl|NC_003116.1_cds_WP_002246299.1_1867	0.255764	0.546843	0.31143
lcl|NC_003116.1_cds_WP_002246300.1_1868	0.209597	0.287896	0.286952
lcl|NC_003116.1_cds_WP_002246319.1_1945	0.316405	0.708934	0.35672
lcl|NC_003116.1_cds_WP_002246323.1_1967	0.25567	0.619438	0.303133
lcl|NC_003116.1_cds_WP_002246325.1_1576	0.251251	0.484972	0.304226
lcl|NC_003116.1_cds_WP_002246325.1_1580	0.251251	0.484972	0.304226
lcl|NC_003116.1_cds_WP_002246334.1_1286	0.261238	0.484527	0.349697
lcl|NC_003116.1_cds_WP_002246350.1_2082	0.234104	0.399249	0.329971
lcl|NC_003116.1_cds_WP_002246358.1_2092	0.257823	0.577125	0.327938
lcl|NC_003116.1_cds_WP_002246361.1_2102	0.25845	0.601386	0.321747
lcl|NC_003116.1_cds_WP_002246362.1_2105	0.267694	0.546272	0.338217
lcl|NC_003116.1_cds_WP_002246363.1_2106	0.286455	0.668627	0.336942
lcl|NC_003116.1_cds_WP_002246364.1_2107	0.244804	0.563026	0.311474
lcl|NC_003116.1_cds_WP_002246365.1_2108	0.265262	0.555728	0.338775
lcl|NC_003116.1_cds_WP_002246366.1_2109	0.251938	0.480393	0.338168
lcl|NC_003116.1_cds_WP_002246374.1_2121	0.223358	0.426553	0.313051
lcl|NC_003116.1_cds_WP_002246376.1_2123	0.237486	0.473666	0.308711
lcl|NC_003116.1_cds_WP_002246378.1_2126	0.228069	0.454574	0.318111
lcl|NC_003116.1_cds_WP_002246379.1_2127	0.235427	0.446401	0.32504
lcl|NC_003116.1_cds_WP_002246380.1_2128	0.246046	0.534515	0.322969
lcl|NC_003116.1_cds_WP_002246381.1_2134	0.246387	0.496761	0.326879
lcl|NC_003116.1_cds_WP_002246387.1_2146	0.24969	0.495378	0.321221
lcl|NC_003116.1_cds_WP_002246389.1_2158	0.276041	0.671123	0.317479
lcl|NC_003116.1_cds_WP_002246395.1_735	0.257652	0.548449	0.326293
lcl|NC_003116.1_cds_WP_002246396.1_731	0.255349	0.479747	0.327054
lcl|NC_003116.1_cds_WP_002246426.1_640	0.245426	0.505844	0.325351
lcl|NC_003116.1_cds_WP_002246427.1_637	0.291586	0.65882	0.344359
lcl|NC_003116.1_cds_WP_002246428.1_636	0.301657	0.691178	0.330287
lcl|NC_003116.1_cds_WP_002246430.1_628	0.259871	0.507699	0.332316
lcl|NC_003116.1_cds_WP_002246433.1_621	0.252225	0.594116	0.305553
lcl|NC_003116.1_cds_WP_002246436.1_613	0.282721	0.698207	0.319526
lcl|NC_003116.1_cds_WP_002246440.1_602	0.276799	0.487622	0.357601
lcl|NC_003116.1_cds_WP_002246442.1_599	0.28255	0.641494	0.337367
lcl|NC_003116.1_cds_WP_002246444.1_591	0.244879	0.466761	0.329032
lcl|NC_003116.1_cds_WP_002246446.1_584	0.221251	0.363224	0.314687
lcl|NC_003116.1_cds_WP_002246447.1_582	0.293268	0.70866	0.334213
lcl|NC_003116.1_cds_WP_002246448.1_580	0.300527	0.687218	0.344536
lcl|NC_003116.1_cds_WP_002246450.1_570	0.31213	0.610053	0.352853
lcl|NC_003116.1_cds_WP_002246453.1_556	0.293651	0.332092	0.347377
lcl|NC_003116.1_cds_WP_002246454.1_555	0.261968	0.539982	0.326689
lcl|NC_003116.1_cds_WP_002246458.1_546	0.256528	0.471659	0.345692
lcl|NC_003116.1_cds_WP_002246461.1_533	0.289888	0.659848	0.330959
lcl|NC_003116.1_cds_WP_002246472.1_506	0.282552	0.638282	0.327888
lcl|NC_003116.1_cds_WP_002246473.1_505	0.216806	0.380405	0.316574
lcl|NC_003116.1_cds_WP_002246489.1_482	0.272715	0.470971	0.346673
lcl|NC_003116.1_cds_WP_002246496.1_469	0.277258	0.588008	0.333613
lcl|NC_003116.1_cds_WP_002246501.1_455	0.216162	0.388629	0.30378
lcl|NC_003116.1_cds_WP_002246514.1_388	0.252696	0.458096	0.332107
lcl|NC_003116.1_cds_WP_002246517.1_383	0.260333	0.618152	0.309326
lcl|NC_003116.1_cds_WP_002246519.1_379	0.270819	0.577417	0.334853
lcl|NC_003116.1_cds_WP_002246520.1_375	0.243427	0.455297	0.313929
lcl|NC_003116.1_cds_WP_002246521.1_370	0.287373	0.636449	0.34712
lcl|NC_003116.1_cds_WP_002246526.1_359	0.240734	0.476419	0.326166
lcl|NC_003116.1_cds_WP_002246527.1_356	0.291279	0.737335	0.324411
lcl|NC_003116.1_cds_WP_002246528.1_355	0.291968	0.607988	0.325724
lcl|NC_003116.1_cds_WP_002246529.1_351	0.276131	0.596861	0.338868
lcl|NC_003116.1_cds_WP_002246530.1_350	0.234504	0.354146	0.324119
lcl|NC_003116.1_cds_WP_002246531.1_349	0.246195	0.406051	0.326837
lcl|NC_003116.1_cds_WP_002246532.1_341	0.206929	0.31176	0.305437
lcl|NC_003116.1_cds_WP_002246536.1_320	0.303099	0.675507	0.346033
lcl|NC_003116.1_cds_WP_002246537.1_318	0.265106	0.569143	0.322544
lcl|NC_003116.1_cds_WP_002246539.1_315	0.245523	0.506984	0.331334
lcl|NC_003116.1_cds_WP_002246543.1_307	0.204319	0.30595	0.314866
lcl|NC_003116.1_cds_WP_002246545.1_298	0.267499	0.53719	0.328861
lcl|NC_003116.1_cds_WP_002246555.1_266	0.264585	0.56395	0.34341
lcl|NC_003116.1_cds_WP_002246557.1_263	0.239772	0.429525	0.328228
lcl|NC_003116.1_cds_WP_002246559.1_261	0.248739	0.521766	0.332169
lcl|NC_003116.1_cds_WP_002246561.1_254	0.261543	0.609207	0.307834
lcl|NC_003116.1_cds_WP_002246562.1_252	0.21352	0.446412	0.304551
lcl|NC_003116.1_cds_WP_002246563.1_251	0.284421	0.662302	0.335842
lcl|NC_003116.1_cds_WP_002246565.1_248	0.272431	0.604243	0.334197
lcl|NC_003116.1_cds_WP_002246566.1_244	0.22096	0.38318	0.331197
lcl|NC_003116.1_cds_WP_002246567.1_242	0.22048	0.393164	0.327187
lcl|NC_003116.1_cds_WP_002246568.1_239	0.249203	0.448072	0.345089
lcl|NC_003116.1_cds_WP_002246734.1_163	0.264023	0.480058	0.338831
lcl|NC_003116.1_cds_WP_002246735.1_164	0.25157	0.458105	0.331462
lcl|NC_003116.1_cds_WP_002246737.1_66	0.295331	0.683268	0.328364
lcl|NC_003116.1_cds_WP_002246738.1_52	0.299399	0.724708	0.334456
lcl|NC_003116.1_cds_WP_002246740.1_105	0.244816	0.414745	0.326433
lcl|NC_003116.1_cds_WP_002246741.1_189	0.247572	0.535951	0.323694
lcl|NC_003116.1_cds_WP_002246744.1_45	0.223573	0.417576	0.31655
lcl|NC_003116.1_cds_WP_002246745.1_33	0.2445	0.522454	0.308924
lcl|NC_003116.1_cds_WP_002246748.1_2419	0.243468	0.488665	0.32993
lcl|NC_003116.1_cds_WP_002246751.1_17	0.250005	0.52063	0.32855
lcl|NC_003116.1_cds_WP_002246752.1_2434	0.258183	0.507912	0.340736
lcl|NC_003116.1_cds_WP_002246754.1_69	0.222513	0.272372	0.314283
lcl|NC_003116.1_cds_WP_002246755.1_2401	0.251785	0.571124	0.312185
lcl|NC_003116.1_cds_WP_002246757.1_7	0.19317	0.28368	0.305794
lcl|NC_003116.1_cds_WP_002246758.1_88	0.251053	0.526156	0.319442
lcl|NC_003116.1_cds_WP_002246761.1_27	0.310462	0.71852	0.343879
lcl|NC_003116.1_cds_WP_002246762.1_60	0.256353	0.464075	0.331638
lcl|NC_003116.1_cds_WP_002246763.1_81	0.24833	0.452208	0.335595
lcl|NC_003116.1_cds_WP_002246766.1_63	0.217579	0.414099	0.31765
lcl|NC_003116.1_cds_WP_002246768.1_86	0.276719	0.549084	0.335546
lcl|NC_003116.1_cds_WP_002246769.1_95	0.298662	0.710337	0.339155
lcl|NC_003116.1_cds_WP_002246770.1_35	0.264136	0.589858	0.321902
lcl|NC_003116.1_cds_WP_002246771.1_6	0.242544	0.521796	0.328682
lcl|NC_003116.1_cds_WP_002246773.1_2314	0.224231	0.423816	0.306639
lcl|NC_003116.1_cds_WP_002246774.1_2285	0.287399	0.57858	0.332908
lcl|NC_003116.1_cds_WP_002246777.1_2242	0.241557	0.460305	0.329554
lcl|NC_003116.1_cds_WP_002246781.1_2283	0.259419	0.523793	0.328618
lcl|NC_003116.1_cds_WP_002246782.1_2321	0.197955	0.341469	0.309462
lcl|NC_003116.1_cds_WP_002246783.1_2304	0.270708	0.642085	0.323028
lcl|NC_003116.1_cds_WP_002246784.1_2288	0.189492	0.225279	0.293825
lcl|NC_003116.1_cds_WP_002246786.1_2287	0.29598	0.695291	0.326274
lcl|NC_003116.1_cds_WP_002246787.1_2278	0.254172	0.564055	0.32885
lcl|NC_003116.1_cds_WP_002246789.1_2329	0.266021	0.563982	0.327664
lcl|NC_003116.1_cds_WP_002246799.1_2292	0.289247	0.680962	0.33843
lcl|NC_003116.1_cds_WP_002246800.1_2286	0.298951	0.676586	0.333795
lcl|NC_003116.1_cds_WP_002246801.1_2280	0.294254	0.637152	0.335733
lcl|NC_003116.1_cds_WP_002246803.1_2337	0.2119	0.286301	0.318549
lcl|NC_003116.1_cds_WP_002246804.1_2252	0.257299	0.527538	0.332272
lcl|NC_003116.1_cds_WP_002246805.1_2237	0.274022	0.561511	0.341292
lcl|NC_003116.1_cds_WP_002246809.1_2284	0.211496	0.402206	0.294599
lcl|NC_003116.1_cds_WP_002246810.1_2328	0.258768	0.530827	0.335351
lcl|NC_003116.1_cds_WP_002246811.1_2322	0.214894	0.314193	0.310445
lcl|NC_003116.1_cds_WP_002246812.1_764	0.202183	0.303426	0.310352
lcl|NC_003116.1_cds_WP_002246813.1_788	0.276634	0.695462	0.31967
lcl|NC_003116.1_cds_WP_002246814.1_785	0.257819	0.518132	0.333952
lcl|NC_003116.1_cds_WP_002246816.1_796	0.235179	0.396177	0.319309
lcl|NC_003116.1_cds_WP_002246817.1_783	0.280643	0.622897	0.339383
lcl|NC_003116.1_cds_WP_002246818.1_1272	0.239898	0.502312	0.319982
lcl|NC_003116.1_cds_WP_002246820.1_756	0.164648	0.275026	0.293386
lcl|NC_003116.1_cds_WP_002246822.1_791	0.246096	0.504071	0.321889
lcl|NC_003116.1_cds_WP_002246823.1_1271	0.29435	0.615785	0.3485
lcl|NC_003116.1_cds_WP_002246825.1_784	0.283777	0.635074	0.337511
lcl|NC_003116.1_cds_WP_002246828.1_1276	0.279497	0.657482	0.328873
lcl|NC_003116.1_cds_WP_002246829.1_787	0.284174	0.632303	0.33925
lcl|NC_003116.1_cds_WP_002246831.1_1273	0.28831	0.610737	0.347237
lcl|NC_003116.1_cds_WP_002246832.1_799	0.241619	0.509567	0.31449
lcl|NC_003116.1_cds_WP_002246834.1_800	0.23929	0.531857	0.309354
lcl|NC_003116.1_cds_WP_002246837.1_795	0.282642	0.682555	0.32511
lcl|NC_003116.1_cds_WP_002246838.1_774	0.256918	0.557638	0.318884
lcl|NC_003116.1_cds_WP_002246839.1_1274	0.266752	0.518811	0.332604
lcl|NC_003116.1_cds_WP_002246840.1_775	0.305628	0.64153	0.347766
lcl|NC_003116.1_cds_WP_002246841.1_794	0.270284	0.602149	0.34261
lcl|NC_003116.1_cds_WP_002246843.1_797	0.27861	0.534522	0.336586
lcl|NC_003116.1_cds_WP_002246844.1_867	0.257656	0.543329	0.318318
lcl|NC_003116.1_cds_WP_002246846.1_862	0.273271	0.616595	0.311256
lcl|NC_003116.1_cds_WP_002246847.1_857	0.24021	0.486462	0.308229
lcl|NC_003116.1_cds_WP_002246848.1_865	0.257793	0.571735	0.30996
lcl|NC_003116.1_cds_WP_002246849.1_898	0.204201	0.294151	0.311237
lcl|NC_003116.1_cds_WP_002246850.1_916	0.329847	0.767998	0.367906
lcl|NC_003116.1_cds_WP_002246852.1_987	0.300758	0.595843	0.351951
lcl|NC_003116.1_cds_WP_002246854.1_917	0.279916	0.590631	0.338185
lcl|NC_003116.1_cds_WP_002246856.1_905	0.26958	0.600981	0.320715
lcl|NC_003116.1_cds_WP_002246857.1_964	0.269062	0.575696	0.331267
lcl|NC_003116.1_cds_WP_002246858.1_913	0.291602	0.661524	0.331286
lcl|NC_003116.1_cds_WP_002246859.1_979	0.241053	0.514592	0.322763
lcl|NC_003116.1_cds_WP_002246860.1_908	0.240216	0.537284	0.305244
lcl|NC_003116.1_cds_WP_002246863.1_906	0.301336	0.678042	0.349317
lcl|NC_003116.1_cds_WP_002246865.1_1217	0.268899	0.610237	0.325198
lcl|NC_003116.1_cds_WP_002246866.1_1170	0.225603	0.447679	0.326415
lcl|NC_003116.1_cds_WP_002246867.1_1069	0.27749	0.616242	0.336512
lcl|NC_003116.1_cds_WP_002246868.1_1117	0.181822	0.291809	0.306369
lcl|NC_003116.1_cds_WP_002246871.1_1058	0.238959	0.495981	0.323046
lcl|NC_003116.1_cds_WP_002246873.1_1215	0.273698	0.50727	0.337238
lcl|NC_003116.1_cds_WP_002246874.1_1166	0.272274	0.5777	0.322929
lcl|NC_003116.1_cds_WP_002246875.1_1216	0.305407	0.593849	0.343391
lcl|NC_003116.1_cds_WP_002246876.1_1220	0.226146	0.49132	0.311664
lcl|NC_003116.1_cds_WP_002246877.1_1244	0.282433	0.566919	0.356228
lcl|NC_003116.1_cds_WP_002246878.1_1057	0.270116	0.557807	0.331633
lcl|NC_003116.1_cds_WP_002246882.1_1091	0.22281	0.387695	0.323157
lcl|NC_003116.1_cds_WP_002246883.1_1210	0.213749	0.387297	0.317539
lcl|NC_003116.1_cds_WP_002246889.1_1118	0.183842	0.265981	0.295247
lcl|NC_003116.1_cds_WP_002246891.1_1214	0.30156	0.645623	0.341788
lcl|NC_003116.1_cds_WP_002246892.1_2198	0.219253	0.369395	0.312112
lcl|NC_003116.1_cds_WP_002246893.1_1255	0.277221	0.59513	0.331261
lcl|NC_003116.1_cds_WP_002246895.1_1061	0.275357	0.548253	0.338884
lcl|NC_003116.1_cds_WP_002246897.1_1092	0.246693	0.548281	0.327825
lcl|NC_003116.1_cds_WP_002246898.1_1056	0.21648	0.406677	0.312483
lcl|NC_003116.1_cds_WP_002246899.1_1116	0.284146	0.608592	0.334063
lcl|NC_003116.1_cds_WP_002246900.1_1201	0.261587	0.547639	0.313749
lcl|NC_003116.1_cds_WP_002246904.1_1257	0.233528	0.441678	0.329843
lcl|NC_003116.1_cds_WP_002246905.1_2197	0.249344	0.51204	0.320348
lcl|NC_003116.1_cds_WP_002246908.1_1185	0.264671	0.643747	0.328289
lcl|NC_003116.1_cds_WP_002246909.1_1142	0.224869	0.389643	0.318472
lcl|NC_003116.1_cds_WP_002246913.1_1001	0.24319	0.468809	0.335544
lcl|NC_003116.1_cds_WP_002246915.1_1030	0.241589	0.546412	0.31027
lcl|NC_003116.1_cds_WP_002246920.1_1305	0.28523	0.661168	0.339186
lcl|NC_003116.1_cds_WP_002246921.1_1306	0.273961	0.606811	0.329802
lcl|NC_003116.1_cds_WP_002246931.1_1423	0.254366	0.504269	0.3268
lcl|NC_003116.1_cds_WP_002246932.1_1425	0.288907	0.616111	0.330275
lcl|NC_003116.1_cds_WP_002246937.1_1416	0.22711	0.395295	0.315316
lcl|NC_003116.1_cds_WP_002246938.1_1409	0.24399	0.41227	0.329861
lcl|NC_003116.1_cds_WP_002246939.1_1420	0.240877	0.467953	0.31235
lcl|NC_003116.1_cds_WP_002246940.1_1441	0.276781	0.60894	0.325531
lcl|NC_003116.1_cds_WP_002246941.1_1690	0.251429	0.495679	0.330098
lcl|NC_003116.1_cds_WP_002246942.1_1554	0.251204	0.451255	0.328273
lcl|NC_003116.1_cds_WP_002246943.1_1557	0.300816	0.689132	0.345692
lcl|NC_003116.1_cds_WP_002246944.1_1552	0.264855	0.482451	0.345474
lcl|NC_003116.1_cds_WP_002246945.1_1482	0.225117	0.420415	0.320289
lcl|NC_003116.1_cds_WP_002246946.1_1541	0.266845	0.562678	0.340241
lcl|NC_003116.1_cds_WP_002246947.1_1587	0.296635	0.627277	0.349733
lcl|NC_003116.1_cds_WP_002246948.1_1634	0.269874	0.546479	0.338784
lcl|NC_003116.1_cds_WP_002246949.1_1691	0.277236	0.537205	0.341394
lcl|NC_003116.1_cds_WP_002246950.1_1652	0.283817	0.612817	0.353283
lcl|NC_003116.1_cds_WP_002246951.1_1651	0.297567	0.647338	0.351142
lcl|NC_003116.1_cds_WP_002246953.1_1548	0.280717	0.622762	0.35236
lcl|NC_003116.1_cds_WP_002246955.1_1654	0.247593	0.473419	0.339965
lcl|NC_003116.1_cds_WP_002246956.1_1444	0.245116	0.488302	0.341364
lcl|NC_003116.1_cds_WP_002246957.1_1545	0.229922	0.376221	0.315386
lcl|NC_003116.1_cds_WP_002246959.1_1586	0.255964	0.53199	0.322852
lcl|NC_003116.1_cds_WP_002246960.1_1584	0.272189	0.604714	0.329164
lcl|NC_003116.1_cds_WP_002246962.1_1609	0.30881	0.704493	0.363819
lcl|NC_003116.1_cds_WP_002246965.1_1572	0.263332	0.587633	0.328285
lcl|NC_003116.1_cds_WP_002246969.1_1443	0.222135	0.434463	0.310449
lcl|NC_003116.1_cds_WP_002246970.1_1603	0.274589	0.589989	0.325088
lcl|NC_003116.1_cds_WP_002246972.1_1551	0.279933	0.637169	0.338638
lcl|NC_003116.1_cds_WP_002246973.1_1547	0.233747	0.400461	0.318596
lcl|NC_003116.1_cds_WP_002246974.1_1472	0.290002	0.651486	0.342334
lcl|NC_003116.1_cds_WP_002246975.1_1527	0.252829	0.534373	0.319928
lcl|NC_003116.1_cds_WP_002246979.1_1674	0.276018	0.557654	0.330667
lcl|NC_003116.1_cds_WP_002246980.1_1666	0.245142	0.429847	0.317739
lcl|NC_003116.1_cds_WP_002246984.1_1714	0.242293	0.516085	0.323988
lcl|NC_003116.1_cds_WP_002246985.1_1736	0.261334	0.542604	0.326903
lcl|NC_003116.1_cds_WP_002246986.1_1725	0.210632	0.360159	0.307114
lcl|NC_003116.1_cds_WP_002246988.1_1716	0.304205	0.674241	0.350596
lcl|NC_003116.1_cds_WP_002246990.1_1765	0.285326	0.612154	0.339646
lcl|NC_003116.1_cds_WP_002246991.1_1804	0.277527	0.609226	0.330652
lcl|NC_003116.1_cds_WP_002246993.1_1799	0.26376	0.523699	0.326032
lcl|NC_003116.1_cds_WP_002246994.1_1808	0.278233	0.674185	0.325221
lcl|NC_003116.1_cds_WP_002246995.1_1809	0.248852	0.569718	0.332429
lcl|NC_003116.1_cds_WP_002246997.1_1755	0.254618	0.490346	0.329364
lcl|NC_003116.1_cds_WP_002246999.1_1786	0.287261	0.671483	0.338292
lcl|NC_003116.1_cds_WP_002247001.1_1747	0.218918	0.460862	0.313524
lcl|NC_003116.1_cds_WP_002247003.1_1876	0.24437	0.466404	0.327819
lcl|NC_003116.1_cds_WP_002247004.1_1806	0.25457	0.528877	0.329854
lcl|NC_003116.1_cds_WP_002247007.1_1838	0.272571	0.639658	0.336526
lcl|NC_003116.1_cds_WP_002247008.1_1875	0.287784	0.632757	0.337901
lcl|NC_003116.1_cds_WP_002247010.1_1805	0.29169	0.574102	0.357331
lcl|NC_003116.1_cds_WP_002247011.1_1752	0.261871	0.589736	0.323646
lcl|NC_003116.1_cds_WP_002247012.1_1860	0.189551	0.377742	0.334694
lcl|NC_003116.1_cds_WP_002247015.1_1869	0.258665	0.544292	0.321544
lcl|NC_003116.1_cds_WP_002247016.1_1803	0.255134	0.585608	0.339287
lcl|NC_003116.1_cds_WP_002247017.1_1884	0.247008	0.455972	0.31987
lcl|NC_003116.1_cds_WP_002247019.1_1911	0.287337	0.614891	0.35939
lcl|NC_003116.1_cds_WP_002247020.1_1896	0.263821	0.55215	0.334616
lcl|NC_003116.1_cds_WP_002247021.1_1985	0.238215	0.514187	0.315135
lcl|NC_003116.1_cds_WP_002247023.1_1935	0.225601	0.441174	0.312113
lcl|NC_003116.1_cds_WP_002247024.1_1990	0.237327	0.390012	0.325077
lcl|NC_003116.1_cds_WP_002247026.1_2078	0.235176	0.427052	0.330303
lcl|NC_003116.1_cds_WP_002247029.1_2077	0.214191	0.343588	0.312609
lcl|NC_003116.1_cds_WP_002247031.1_2063	0.248612	0.433547	0.334857
lcl|NC_003116.1_cds_WP_002247034.1_2163	0.22211	0.419569	0.318731
lcl|NC_003116.1_cds_WP_002247035.1_2100	0.268178	0.597669	0.338278
lcl|NC_003116.1_cds_WP_002247038.1_2114	0.265502	0.557715	0.338217
lcl|NC_003116.1_cds_WP_002247040.1_2087	0.236201	0.41521	0.323417
lcl|NC_003116.1_cds_WP_002247041.1_2151	0.245031	0.514243	0.334116
lcl|NC_003116.1_cds_WP_002247043.1_2139	0.252968	0.512696	0.323238
lcl|NC_003116.1_cds_WP_002247044.1_2140	0.227872	0.416668	0.321338
lcl|NC_003116.1_cds_WP_002247045.1_2124	0.222369	0.422683	0.308605
lcl|NC_003116.1_cds_WP_002247046.1_2083	0.226744	0.417357	0.31091
lcl|NC_003116.1_cds_WP_002247048.1_2136	0.267916	0.568689	0.322891
lcl|NC_003116.1_cds_WP_002247049.1_2162	0.24303	0.408001	0.329325
lcl|NC_003116.1_cds_WP_002247052.1_669	0.271577	0.53108	0.316458
lcl|NC_003116.1_cds_WP_002247054.1_668	0.258392	0.44599	0.339622
lcl|NC_003116.1_cds_WP_002247056.1_670	0.280835	0.614555	0.349467
lcl|NC_003116.1_cds_WP_002247057.1_725	0.288864	0.636909	0.354974
lcl|NC_003116.1_cds_WP_002247061.1_663	0.292558	0.634991	0.33676
lcl|NC_003116.1_cds_WP_002247062.1_689	0.279454	0.592822	0.34044
lcl|NC_003116.1_cds_WP_002247063.1_703	0.274428	0.660537	0.309537
lcl|NC_003116.1_cds_WP_002247064.1_681	0.26315	0.527696	0.328118
lcl|NC_003116.1_cds_WP_002247068.1_676	0.267025	0.608509	0.333661
lcl|NC_003116.1_cds_WP_002247071.1_702	0.271327	0.571222	0.330152
lcl|NC_003116.1_cds_WP_002247072.1_704	0.257642	0.622531	0.316302
lcl|NC_003116.1_cds_WP_002247077.1_675	0.254071	0.494212	0.315793
lcl|NC_003116.1_cds_WP_002247080.1_273	0.25608	0.571258	0.308
lcl|NC_003116.1_cds_WP_002247082.1_623	0.252443	0.560256	0.309541
lcl|NC_003116.1_cds_WP_002247084.1_619	0.253947	0.540578	0.330847
lcl|NC_003116.1_cds_WP_002247085.1_286	0.216807	0.389444	0.315638
lcl|NC_003116.1_cds_WP_002247086.1_2213	0.251453	0.535632	0.319703
lcl|NC_003116.1_cds_WP_002247088.1_610	0.228413	0.444166	0.337135
lcl|NC_003116.1_cds_WP_002247089.1_277	0.245904	0.536176	0.310142
lcl|NC_003116.1_cds_WP_002247090.1_572	0.289773	0.658291	0.330688
lcl|NC_003116.1_cds_WP_002247091.1_597	0.225266	0.437457	0.299114
lcl|NC_003116.1_cds_WP_002247092.1_583	0.265579	0.537361	0.330278
lcl|NC_003116.1_cds_WP_002247093.1_313	0.272404	0.626641	0.321748
lcl|NC_003116.1_cds_WP_002247094.1_471	0.285275	0.610566	0.348029
lcl|NC_003116.1_cds_WP_002247096.1_281	0.249651	0.467544	0.3087
lcl|NC_003116.1_cds_WP_002247098.1_364	0.317465	0.683813	0.352157
lcl|NC_003116.1_cds_WP_002247101.1_279	0.259395	0.582231	0.311096
lcl|NC_003116.1_cds_WP_002247105.1_296	0.299966	0.712054	0.338852
lcl|NC_003116.1_cds_WP_002247106.1_2211	0.215935	0.433113	0.299374
lcl|NC_003116.1_cds_WP_002247108.1_478	0.259481	0.538751	0.341898
lcl|NC_003116.1_cds_WP_002247109.1_479	0.274099	0.619661	0.331189
lcl|NC_003116.1_cds_WP_002247110.1_476	0.235858	0.517358	0.31493
lcl|NC_003116.1_cds_WP_002247113.1_291	0.218211	0.415065	0.312265
lcl|NC_003116.1_cds_WP_002247114.1_304	0.277172	0.570443	0.34915
lcl|NC_003116.1_cds_WP_002247118.1_274	0.263392	0.522787	0.313866
lcl|NC_003116.1_cds_WP_002247120.1_629	0.257408	0.577781	0.322733
lcl|NC_003116.1_cds_WP_002247122.1_474	0.309616	0.751156	0.338864
lcl|NC_003116.1_cds_WP_002247123.1_620	0.277073	0.622787	0.322684
lcl|NC_003116.1_cds_WP_002247124.1_477	0.230636	0.451336	0.321464
lcl|NC_003116.1_cds_WP_002247131.1_644	0.243467	0.45512	0.321931
lcl|NC_003116.1_cds_WP_002247132.1_586	0.290028	0.673586	0.339138
lcl|NC_003116.1_cds_WP_002247137.1_573	0.263545	0.646971	0.3204
lcl|NC_003116.1_cds_WP_002247140.1_366	0.276098	0.597726	0.338304
lcl|NC_003116.1_cds_WP_002247141.1_459	0.276908	0.58386	0.328289
lcl|NC_003116.1_cds_WP_002247142.1_645	0.284244	0.613727	0.344472
lcl|NC_003116.1_cds_WP_002247144.1_280	0.246461	0.536632	0.300647
lcl|NC_003116.1_cds_WP_002247146.1_611	0.234355	0.430672	0.348319
lcl|NC_003116.1_cds_WP_002247147.1_2210	0.26634	0.583673	0.30903
lcl|NC_003116.1_cds_WP_002247149.1_554	0.25497	0.455319	0.319418
lcl|NC_003116.1_cds_WP_002247150.1_516	0.304876	0.675619	0.349663
lcl|NC_003116.1_cds_WP_002247151.1_814	0.274066	0.568947	0.337252
lcl|NC_003116.1_cds_WP_002247152.1_552	0.243464	0.517707	0.332827
lcl|NC_003116.1_cds_WP_002247154.1_522	0.253481	0.438964	0.330598
lcl|NC_003116.1_cds_WP_002247156.1_810	0.251249	0.573005	0.316228
lcl|NC_003116.1_cds_WP_002247157.1_548	0.277352	0.539807	0.341851
lcl|NC_003116.1_cds_WP_002247158.1_553	0.285945	0.64218	0.345444
lcl|NC_003116.1_cds_WP_002247159.1_851	0.17898	0.268826	0.309389
lcl|NC_003116.1_cds_WP_002247160.1_508	0.292597	0.669653	0.345439
lcl|NC_003116.1_cds_WP_002247161.1_819	0.269243	0.56146	0.345473
lcl|NC_003116.1_cds_WP_002247162.1_518	0.252728	0.568018	0.315886
lcl|NC_003116.1_cds_WP_002247164.1_531	0.267525	0.556088	0.329329
lcl|NC_003116.1_cds_WP_002247167.1_507	0.27514	0.475277	0.341643
lcl|NC_003116.1_cds_WP_002247168.1_513	0.262469	0.526373	0.33333
lcl|NC_003116.1_cds_WP_002247169.1_805	0.317277	0.638834	0.375539
lcl|NC_003116.1_cds_WP_002247170.1_809	0.213458	0.380203	0.310941
lcl|NC_003116.1_cds_WP_002247171.1_525	0.231677	0.508143	0.308113
lcl|NC_003116.1_cds_WP_002247173.1_549	0.219358	0.370156	0.341057
lcl|NC_003116.1_cds_WP_002247175.1_384	0.280886	0.586603	0.331947
lcl|NC_003116.1_cds_WP_002247176.1_413	0.269805	0.517412	0.337605
lcl|NC_003116.1_cds_WP_002247178.1_390	0.253997	0.447012	0.356265
lcl|NC_003116.1_cds_WP_002247179.1_259	0.285064	0.659393	0.347237
lcl|NC_003116.1_cds_WP_002247180.1_258	0.292938	0.547092	0.349643
lcl|NC_003116.1_cds_WP_002247181.1_437	0.221444	0.463472	0.325812
lcl|NC_003116.1_cds_WP_002247182.1_426	0.267472	0.588598	0.31726
lcl|NC_003116.1_cds_WP_002247183.1_414	0.252579	0.50223	0.317398
lcl|NC_003116.1_cds_WP_002247184.1_224	0.257746	0.535942	0.312909
lcl|NC_003116.1_cds_WP_002247186.1_389	0.258404	0.523861	0.336392
lcl|NC_003116.1_cds_WP_002247187.1_420	0.261785	0.570331	0.333246
lcl|NC_003116.1_cds_WP_002247188.1_393	0.28796	0.65154	0.337704
lcl|NC_003116.1_cds_WP_002247189.1_214	0.236375	0.3986	0.320662
lcl|NC_003116.1_cds_WP_002247191.1_216	0.223908	0.411256	0.30645
lcl|NC_003116.1_cds_WP_002247192.1_440	0.223685	0.407275	0.32637
lcl|NC_003116.1_cds_WP_002247196.1_442	0.262194	0.575066	0.324471
lcl|NC_003116.1_cds_WP_002247197.1_264	0.264797	0.500209	0.337533
lcl|NC_003116.1_cds_WP_002248109.1_2115	0.26697	0.465242	0.358022
lcl|NC_003116.1_cds_WP_002248110.1_2116	0.274567	0.576338	0.33039
lcl|NC_003116.1_cds_WP_002249384.1_1622	0.272271	0.558122	0.353508
lcl|NC_003116.1_cds_WP_002249457.1_674	0.291401	0.692419	0.340412
lcl|NC_003116.1_cds_WP_002249458.1_673	0.232951	0.524825	0.308043
lcl|NC_003116.1_cds_WP_002249477.1_512	0.27521	0.509649	0.338152
lcl|NC_003116.1_cds_WP_002249498.1_1354	0.262047	0.546721	0.315144
lcl|NC_003116.1_cds_WP_002249799.1_557	0.253111	0.520839	0.322083
lcl|NC_003116.1_cds_WP_002249820.1_204	0.247296	0.480581	0.335278
lcl|NC_003116.1_cds_WP_002249830.1_1016	0.236578	0.474256	0.324818
lcl|NC_003116.1_cds_WP_002249831.1_1019	0.228645	0.426216	0.304451
lcl|NC_003116.1_cds_WP_002249833.1_1119	0.277728	0.667984	0.336255
lcl|NC_003116.1_cds_WP_002249837.1_1231	0.268108	0.548628	0.348487
lcl|NC_003116.1_cds_WP_002249840.1_837	0.249347	0.486471	0.30259
lcl|NC_003116.1_cds_WP_002249844.1_1542	0.291393	0.647579	0.3443
lcl|NC_003116.1_cds_WP_002249855.1_2053	0.250192	0.395625	0.317513
lcl|NC_003116.1_cds_WP_002249856.1_2057	0.237503	0.438676	0.325857
lcl|NC_003116.1_cds_WP_002249878.1_312	0.283915	0.564573	0.335402
lcl|NC_003116.1_cds_WP_002250026.1_759	0.215773	0.40778	0.313875
lcl|NC_003116.1_cds_WP_002250113.1_1125	0.25802	0.531825	0.340557
lcl|NC_003116.1_cds_WP_002250303.1_2026	0.258838	0.515869	0.340303
lcl|NC_003116.1_cds_WP_002250305.1_2047	0.252547	0.580077	0.321357
lcl|NC_003116.1_cds_WP_002250345.1_744	0.254243	0.389228	0.339616
lcl|NC_003116.1_cds_WP_002250498.1_1123	0.216764	0.361086	0.309909
lcl|NC_003116.1_cds_WP_002250548.1_250	0.242298	0.341069	0.336497
lcl|NC_003116.1_cds_WP_002250798.1_346	0.237609	0.391362	0.299657
lcl|NC_003116.1_cds_WP_002251786.1_48	0.242568	0.44208	0.318362
lcl|NC_003116.1_cds_WP_002251827.1_1764	0.279891	0.645551	0.326301
lcl|NC_003116.1_cds_WP_002251828.1_1769	0.187913	0.3118	0.267485
lcl|NC_003116.1_cds_WP_002251857.1_1278	0.250488	0.486377	0.320964
lcl|NC_003116.1_cds_WP_002252311.1_1311	0.225719	0.358054	0.299706
lcl|NC_003116.1_cds_WP_002253463.1_972	0.253453	0.415497	0.339319
lcl|NC_003116.1_cds_WP_002253488.1_1975	0.299029	0.716182	0.342484
lcl|NC_003116.1_cds_WP_002253492.1_2062	0.269719	0.561119	0.320857
lcl|NC_003116.1_cds_WP_002253501.1_743	0.232981	0.341235	0.311736
lcl|NC_003116.1_cds_WP_002253929.1_1025	0.26384	0.591504	0.302516
lcl|NC_003116.1_cds_WP_002253988.1_824	0.26122	0.562372	0.332657
lcl|NC_003116.1_cds_WP_002254255.1_339	0.229476	0.291563	0.288589
lcl|NC_003116.1_cds_WP_002254386.1_639	0.225887	0.488792	0.307111
lcl|NC_003116.1_cds_WP_002256360.1_2389	0.256935	0.516481	0.308903
[truncated: 440 more rows]

## Sheet: Vibrio cholerae
Table S3: The gtAI, stAI, and CAI values for the three bacterial organisms used in the study.
gene id	gtAI	CAI	StAI
lcl|NC_012582.1_cds_1011	0.30439	0.469503	0.269137
lcl|NC_012582.1_cds_1038	0.318822	0.681381	0.280582
lcl|NC_012582.1_cds_1069	0.292027	0.553257	0.259872
lcl|NC_012582.1_cds_1126	0.245037	0.394045	0.221311
lcl|NC_012582.1_cds_1182	0.310565	0.728943	0.279021
lcl|NC_012582.1_cds_1201	0.245037	0.394045	0.221311
lcl|NC_012582.1_cds_1235	0.304042	0.675303	0.27172
lcl|NC_012582.1_cds_1369	0.283442	0.772076	0.276631
lcl|NC_012582.1_cds_1432	0.23762	0.440164	0.22167
lcl|NC_012582.1_cds_1501	0.278175	0.477336	0.244086
lcl|NC_012582.1_cds_1550	0.306147	0.569824	0.27077
lcl|NC_012582.1_cds_1631	0.252223	0.362783	0.199488
lcl|NC_012582.1_cds_1651	0.256067	0.400736	0.223195
lcl|NC_012582.1_cds_1668	0.280008	0.492708	0.253628
lcl|NC_012582.1_cds_1670	0.277201	0.482043	0.242833
lcl|NC_012582.1_cds_1682	0.242895	0.343744	0.208991
lcl|NC_012582.1_cds_1706	0.265542	0.412776	0.24227
lcl|NC_012582.1_cds_1768	0.240955	0.353685	0.212995
lcl|NC_012582.1_cds_1852	0.298875	0.389878	0.260224
lcl|NC_012582.1_cds_1858	0.245523	0.338125	0.209055
lcl|NC_012582.1_cds_1887	0.256475	0.430272	0.228736
lcl|NC_012582.1_cds_20	0.267194	0.41713	0.235703
lcl|NC_012582.1_cds_218	0.238301	0.347472	0.225515
lcl|NC_012582.1_cds_2399	0.278904	0.386033	0.245028
lcl|NC_012582.1_cds_2480	0.261103	0.495254	0.220199
lcl|NC_012582.1_cds_2670	0.213408	0.448373	0.209672
lcl|NC_012582.1_cds_2701	0.264539	0.433093	0.237318
lcl|NC_012582.1_cds_281	0.235025	0.324169	0.220031
lcl|NC_012582.1_cds_282	0.259273	0.324153	0.235633
lcl|NC_012582.1_cds_283	0.272258	0.392085	0.22309
lcl|NC_012582.1_cds_346	0.274939	0.443551	0.248034
lcl|NC_012582.1_cds_38	0.286783	0.562018	0.215135
lcl|NC_012582.1_cds_442	0.268357	0.432845	0.244085
lcl|NC_012582.1_cds_5	0.260551	0.451716	0.239584
lcl|NC_012582.1_cds_7	0.266892	0.480754	0.239809
lcl|NC_012582.1_cds_799	0.253807	0.40077	0.210016
lcl|NC_012582.1_cds_802	0.287497	0.362121	0.243168
lcl|NC_012582.1_cds_825	0.247694	0.332742	0.201141
lcl|NC_012582.1_cds_827	0.272692	0.463583	0.235418
lcl|NC_012582.1_cds_894	0.247821	0.377199	0.21954
lcl|NC_012582.1_cds_WP_000002589.1_1310	0.296643	0.516894	0.263803
lcl|NC_012582.1_cds_WP_000002742.1_672	0.282103	0.700998	0.308799
lcl|NC_012582.1_cds_WP_000002757.1_1839	0.295358	0.510545	0.259363
lcl|NC_012582.1_cds_WP_000002768.1_1808	0.265972	0.467556	0.23871
lcl|NC_012582.1_cds_WP_000002982.1_534	0.285142	0.539678	0.2567
lcl|NC_012582.1_cds_WP_000003105.1_1590	0.283127	0.495203	0.24497
lcl|NC_012582.1_cds_WP_000003291.1_1238	0.297536	0.555997	0.262232
lcl|NC_012582.1_cds_WP_000004104.1_895	0.253874	0.398191	0.216435
lcl|NC_012582.1_cds_WP_000004496.1_2373	0.271532	0.492858	0.242196
lcl|NC_012582.1_cds_WP_000004747.1_408	0.257097	0.453909	0.218604
lcl|NC_012582.1_cds_WP_000004757.1_1128	0.274659	0.595006	0.250842
lcl|NC_012582.1_cds_WP_000004757.1_1199	0.274659	0.595006	0.250842
lcl|NC_012582.1_cds_WP_000005325.1_2655	0.298198	0.552688	0.255492
lcl|NC_012582.1_cds_WP_000005583.1_482	0.325518	0.669951	0.2888
lcl|NC_012582.1_cds_WP_000005604.1_2573	0.308768	0.683434	0.296074
lcl|NC_012582.1_cds_WP_000005741.1_621	0.330613	0.604811	0.277753
lcl|NC_012582.1_cds_WP_000006091.1_675	0.315751	0.719484	0.284086
lcl|NC_012582.1_cds_WP_000006444.1_117	0.272028	0.453919	0.246337
lcl|NC_012582.1_cds_WP_000006481.1_2514	0.31446	0.617154	0.275127
lcl|NC_012582.1_cds_WP_000006850.1_545	0.276846	0.468712	0.236902
lcl|NC_012582.1_cds_WP_000007388.1_2688	0.355409	0.729636	0.340791
lcl|NC_012582.1_cds_WP_000008477.1_111	0.271302	0.465902	0.219867
lcl|NC_012582.1_cds_WP_000008606.1_1117	0.313552	0.591689	0.267479
lcl|NC_012582.1_cds_WP_000008606.1_1210	0.313552	0.591689	0.267479
lcl|NC_012582.1_cds_WP_000009571.1_881	0.301111	0.55155	0.259302
lcl|NC_012582.1_cds_WP_000010183.1_375	0.291208	0.55315	0.260091
lcl|NC_012582.1_cds_WP_000010608.1_1460	0.295233	0.533957	0.260413
lcl|NC_012582.1_cds_WP_000011329.1_1923	0.292881	0.634963	0.25284
lcl|NC_012582.1_cds_WP_000012771.1_2503	0.300997	0.55095	0.259144
lcl|NC_012582.1_cds_WP_000013199.1_1017	0.316732	0.585576	0.294916
lcl|NC_012582.1_cds_WP_000013845.1_2518	0.303482	0.645604	0.269239
lcl|NC_012582.1_cds_WP_000014298.1_784	0.264429	0.454944	0.246942
lcl|NC_012582.1_cds_WP_000016342.1_280	0.262551	0.439644	0.235417
lcl|NC_012582.1_cds_WP_000016423.1_2254	0.324688	0.658506	0.276212
lcl|NC_012582.1_cds_WP_000017256.1_2045	0.286312	0.472869	0.232328
lcl|NC_012582.1_cds_WP_000017906.1_309	0.306297	0.579893	0.269028
lcl|NC_012582.1_cds_WP_000018079.1_782	0.279361	0.456898	0.251037
lcl|NC_012582.1_cds_WP_000018291.1_1880	0.283014	0.544792	0.253856
lcl|NC_012582.1_cds_WP_000018881.1_670	0.283857	0.481855	0.242116
lcl|NC_012582.1_cds_WP_000018991.1_1746	0.289318	0.50137	0.240869
lcl|NC_012582.1_cds_WP_000019056.1_1464	0.266027	0.492343	0.228726
lcl|NC_012582.1_cds_WP_000019178.1_1389	0.284887	0.449045	0.241976
lcl|NC_012582.1_cds_WP_000019246.1_2462	0.292102	0.597432	0.264303
lcl|NC_012582.1_cds_WP_000019311.1_2524	0.267791	0.451254	0.241769
lcl|NC_012582.1_cds_WP_000019331.1_454	0.341144	0.680144	0.283344
lcl|NC_012582.1_cds_WP_000020698.1_815	0.292108	0.447438	0.243686
lcl|NC_012582.1_cds_WP_000021205.1_930	0.319465	0.584788	0.278664
lcl|NC_012582.1_cds_WP_000021516.1_1920	0.304986	0.590046	0.271724
lcl|NC_012582.1_cds_WP_000021609.1_1505	0.287545	0.476632	0.252578
lcl|NC_012582.1_cds_WP_000021958.1_1969	0.241892	0.367994	0.210157
lcl|NC_012582.1_cds_WP_000023305.1_2287	0.3177	0.646071	0.284453
lcl|NC_012582.1_cds_WP_000023794.1_1678	0.309462	0.59998	0.278418
lcl|NC_012582.1_cds_WP_000024072.1_2474	0.293192	0.601429	0.260785
lcl|NC_012582.1_cds_WP_000024431.1_1134	0.32666	0.647784	0.280192
lcl|NC_012582.1_cds_WP_000024431.1_1193	0.32666	0.647784	0.280192
lcl|NC_012582.1_cds_WP_000024919.1_200	0.323756	0.649792	0.281009
lcl|NC_012582.1_cds_WP_000025476.1_2123	0.315629	0.722359	0.27777
lcl|NC_012582.1_cds_WP_000025716.1_1680	0.299671	0.6004	0.257541
lcl|NC_012582.1_cds_WP_000026587.1_781	0.294715	0.596561	0.26129
lcl|NC_012582.1_cds_WP_000027036.1_1120	0.297761	0.58893	0.267489
lcl|NC_012582.1_cds_WP_000027036.1_1207	0.297761	0.58893	0.267489
lcl|NC_012582.1_cds_WP_000027778.1_542	0.290194	0.531188	0.252678
lcl|NC_012582.1_cds_WP_000027788.1_1053	0.284846	0.490759	0.246587
lcl|NC_012582.1_cds_WP_000027970.1_1854	0.278965	0.419296	0.23901
lcl|NC_012582.1_cds_WP_000028973.1_361	0.275396	0.800286	0.300479
lcl|NC_012582.1_cds_WP_000029435.1_1048	0.280084	0.4997	0.243692
lcl|NC_012582.1_cds_WP_000029912.1_1486	0.277842	0.518261	0.247616
lcl|NC_012582.1_cds_WP_000029983.1_985	0.302775	0.542457	0.260794
lcl|NC_012582.1_cds_WP_000030087.1_2716	0.309411	0.637386	0.280597
lcl|NC_012582.1_cds_WP_000030317.1_2502	0.297654	0.583456	0.271049
lcl|NC_012582.1_cds_WP_000031534.1_2424	0.325543	0.780187	0.291981
lcl|NC_012582.1_cds_WP_000031601.1_637	0.338359	0.74275	0.296384
lcl|NC_012582.1_cds_WP_000031644.1_355	0.363916	0.76172	0.325824
lcl|NC_012582.1_cds_WP_000031644.1_396	0.36485	0.7662	0.328044
lcl|NC_012582.1_cds_WP_000032505.1_2519	0.274039	0.610333	0.259514
lcl|NC_012582.1_cds_WP_000032608.1_555	0.302923	0.552174	0.264701
lcl|NC_012582.1_cds_WP_000032624.1_2062	0.299576	0.694965	0.270942
lcl|NC_012582.1_cds_WP_000034368.1_507	0.336005	0.8249	0.310555
lcl|NC_012582.1_cds_WP_000034986.1_893	0.281238	0.445817	0.232803
lcl|NC_012582.1_cds_WP_000035032.1_471	0.29367	0.518449	0.260348
lcl|NC_012582.1_cds_WP_000035502.1_1843	0.248651	0.43575	0.220464
lcl|NC_012582.1_cds_WP_000036741.1_2460	0.339231	0.820302	0.322705
lcl|NC_012582.1_cds_WP_000036920.1_938	0.297469	0.586417	0.264783
lcl|NC_012582.1_cds_WP_000037415.1_2302	0.322712	0.677268	0.286194
lcl|NC_012582.1_cds_WP_000037642.1_1864	0.27979	0.474854	0.245615
lcl|NC_012582.1_cds_WP_000038553.1_932	0.325708	0.652675	0.302105
lcl|NC_012582.1_cds_WP_000039390.1_2402	0.298293	0.506914	0.255145
lcl|NC_012582.1_cds_WP_000040558.1_1109	0.294164	0.515971	0.255774
lcl|NC_012582.1_cds_WP_000040558.1_1218	0.294164	0.515971	0.255774
lcl|NC_012582.1_cds_WP_000041130.1_1062	0.339617	0.797201	0.321442
lcl|NC_012582.1_cds_WP_000041521.1_2155	0.297868	0.543232	0.253929
lcl|NC_012582.1_cds_WP_000041728.1_1158	0.29677	0.53848	0.275833
lcl|NC_012582.1_cds_WP_000042146.1_2000	0.276932	0.513888	0.236342
lcl|NC_012582.1_cds_WP_000042175.1_2488	0.282446	0.516092	0.254993
lcl|NC_012582.1_cds_WP_000042558.1_610	0.30566	0.639386	0.289122
lcl|NC_012582.1_cds_WP_000042590.1_915	0.302036	0.566566	0.274776
lcl|NC_012582.1_cds_WP_000042615.1_2630	0.320984	0.661543	0.283574
lcl|NC_012582.1_cds_WP_000042747.1_1029	0.299347	0.53381	0.263321
lcl|NC_012582.1_cds_WP_000042817.1_1984	0.281456	0.520165	0.238895
lcl|NC_012582.1_cds_WP_000042993.1_253	0.291495	0.581914	0.253065
lcl|NC_012582.1_cds_WP_000043021.1_2130	0.234532	0.460319	0.219576
lcl|NC_012582.1_cds_WP_000043056.1_2563	0.297497	0.543337	0.253868
lcl|NC_012582.1_cds_WP_000043135.1_161	0.277824	0.633992	0.266313
lcl|NC_012582.1_cds_WP_000043220.1_630	0.288009	0.549093	0.236213
lcl|NC_012582.1_cds_WP_000043567.1_1150	0.326647	0.626877	0.275373
lcl|NC_012582.1_cds_WP_000043914.1_837	0.337385	0.647612	0.288562
lcl|NC_012582.1_cds_WP_000044381.1_2335	0.289418	0.542272	0.253187
lcl|NC_012582.1_cds_WP_000044450.1_1754	0.29494	0.539078	0.260954
lcl|NC_012582.1_cds_WP_000044695.1_2059	0.327209	0.669861	0.285534
lcl|NC_012582.1_cds_WP_000044781.1_170	0.346632	0.781446	0.329536
lcl|NC_012582.1_cds_WP_000045131.1_2404	0.308998	0.614618	0.277132
lcl|NC_012582.1_cds_WP_000045419.1_2133	0.282861	0.510482	0.245231
lcl|NC_012582.1_cds_WP_000045526.1_1449	0.294838	0.559711	0.247805
lcl|NC_012582.1_cds_WP_000046688.1_1921	0.321393	0.592877	0.280879
lcl|NC_012582.1_cds_WP_000046692.1_2004	0.296914	0.639672	0.266268
lcl|NC_012582.1_cds_WP_000048790.1_1041	0.264544	0.429506	0.212324
lcl|NC_012582.1_cds_WP_000049003.1_2457	0.283769	0.498746	0.251973
lcl|NC_012582.1_cds_WP_000049171.1_2648	0.313475	0.723029	0.277852
lcl|NC_012582.1_cds_WP_000049893.1_877	0.29843	0.545501	0.255574
lcl|NC_012582.1_cds_WP_000050052.1_1256	0.310912	0.574958	0.26982
lcl|NC_012582.1_cds_WP_000050195.1_2634	0.292849	0.553401	0.260333
lcl|NC_012582.1_cds_WP_000051797.1_2080	0.307725	0.563033	0.266526
lcl|NC_012582.1_cds_WP_000051831.1_2367	0.331458	0.726023	0.305311
lcl|NC_012582.1_cds_WP_000051920.1_2229	0.295694	0.551194	0.26061
lcl|NC_012582.1_cds_WP_000052031.1_2177	0.281463	0.501381	0.240648
lcl|NC_012582.1_cds_WP_000052153.1_1926	0.304009	0.585998	0.271578
lcl|NC_012582.1_cds_WP_000052808.1_1401	0.30484	0.64774	0.268678
lcl|NC_012582.1_cds_WP_000053137.1_726	0.324223	0.748343	0.298325
lcl|NC_012582.1_cds_WP_000053959.1_246	0.294486	0.487075	0.243783
lcl|NC_012582.1_cds_WP_000054219.1_2210	0.272879	0.477285	0.241541
lcl|NC_012582.1_cds_WP_000054253.1_93	0.292922	0.557181	0.255169
lcl|NC_012582.1_cds_WP_000054416.1_2002	0.281928	0.598952	0.260093
lcl|NC_012582.1_cds_WP_000054465.1_209	0.298401	0.54242	0.255962
lcl|NC_012582.1_cds_WP_000054941.1_1287	0.285721	0.537081	0.254546
lcl|NC_012582.1_cds_WP_000055654.1_641	0.385125	0.830156	0.361445
lcl|NC_012582.1_cds_WP_000055726.1_2270	0.338936	0.685445	0.290317
lcl|NC_012582.1_cds_WP_000055824.1_1811	0.261445	0.398913	0.218116
lcl|NC_012582.1_cds_WP_000056163.1_2551	0.310626	0.756727	0.291259
lcl|NC_012582.1_cds_WP_000056565.1_2653	0.299583	0.598433	0.282341
lcl|NC_012582.1_cds_WP_000056830.1_2451	0.305542	0.520361	0.265237
lcl|NC_012582.1_cds_WP_000056887.1_2512	0.286214	0.507778	0.247747
lcl|NC_012582.1_cds_WP_000057938.1_1465	0.291961	0.543058	0.257941
lcl|NC_012582.1_cds_WP_000058339.1_2671	0.286554	0.504733	0.256477
lcl|NC_012582.1_cds_WP_000058359.1_1329	0.289709	0.572629	0.249467
lcl|NC_012582.1_cds_WP_000059253.1_2364	0.317769	0.661359	0.282779
lcl|NC_012582.1_cds_WP_000059348.1_2533	0.296093	0.498116	0.267592
lcl|NC_012582.1_cds_WP_000059473.1_1842	0.291836	0.545559	0.274712
lcl|NC_012582.1_cds_WP_000060371.1_107	0.310965	0.600715	0.300982
lcl|NC_012582.1_cds_WP_000061034.1_1581	0.291184	0.486096	0.262993
lcl|NC_012582.1_cds_WP_000061070.1_989	0.289366	0.475166	0.255647
lcl|NC_012582.1_cds_WP_000061358.1_1406	0.296669	0.514096	0.253042
lcl|NC_012582.1_cds_WP_000061696.1_1671	0.294083	0.484102	0.26313
lcl|NC_012582.1_cds_WP_000061906.1_561	0.299894	0.597023	0.275759
lcl|NC_012582.1_cds_WP_000062277.1_37	0.250242	0.442816	0.22715
lcl|NC_012582.1_cds_WP_000062614.1_2589	0.318819	0.712671	0.300785
lcl|NC_012582.1_cds_WP_000063017.1_1077	0.28522	0.479975	0.241612
lcl|NC_012582.1_cds_WP_000063600.1_570	0.267107	0.503974	0.231461
lcl|NC_012582.1_cds_WP_000064038.1_835	0.313443	0.705808	0.290702
lcl|NC_012582.1_cds_WP_000064142.1_2605	0.316885	0.56342	0.283139
lcl|NC_012582.1_cds_WP_000064348.1_2240	0.276929	0.48542	0.224955
lcl|NC_012582.1_cds_WP_000064966.1_977	0.332906	0.632922	0.286704
lcl|NC_012582.1_cds_WP_000065130.1_2060	0.311443	0.775493	0.295782
lcl|NC_012582.1_cds_WP_000065250.1_563	0.330835	0.789169	0.319823
lcl|NC_012582.1_cds_WP_000065387.1_1098	0.257867	0.425184	0.229674
lcl|NC_012582.1_cds_WP_000065387.1_1229	0.257867	0.425184	0.229674
lcl|NC_012582.1_cds_WP_000065402.1_1856	0.262395	0.480192	0.217854
lcl|NC_012582.1_cds_WP_000066203.1_931	0.302359	0.577385	0.269469
lcl|NC_012582.1_cds_WP_000067024.1_1375	0.26207	0.426994	0.224618
lcl|NC_012582.1_cds_WP_000067249.1_110	0.286458	0.523303	0.256063
lcl|NC_012582.1_cds_WP_000068600.1_1136	0.296951	0.575276	0.255882
lcl|NC_012582.1_cds_WP_000068600.1_1191	0.296951	0.575276	0.255882
lcl|NC_012582.1_cds_WP_000069193.1_2023	0.292124	0.551788	0.262436
lcl|NC_012582.1_cds_WP_000070020.1_163	0.327126	0.699537	0.286385
lcl|NC_012582.1_cds_WP_000070180.1_2720	0.304708	0.676891	0.284077
lcl|NC_012582.1_cds_WP_000070212.1_216	0.313019	0.626148	0.28091
lcl|NC_012582.1_cds_WP_000070239.1_1741	0.291564	0.553975	0.25529
lcl|NC_012582.1_cds_WP_000070417.1_844	0.298279	0.617991	0.269987
lcl|NC_012582.1_cds_WP_000070442.1_2489	0.281099	0.518608	0.250007
lcl|NC_012582.1_cds_WP_000070850.1_1380	0.282254	0.444215	0.245601
lcl|NC_012582.1_cds_WP_000071094.1_2661	0.293294	0.666966	0.275693
lcl|NC_012582.1_cds_WP_000071109.1_116	0.284259	0.491547	0.24864
lcl|NC_012582.1_cds_WP_000071973.1_676	0.301381	0.594151	0.260337
lcl|NC_012582.1_cds_WP_000072374.1_1628	0.270531	0.423728	0.238205
lcl|NC_012582.1_cds_WP_000073132.1_1248	0.318589	0.646664	0.280952
lcl|NC_012582.1_cds_WP_000073973.1_1072	0.291726	0.509075	0.252147
lcl|NC_012582.1_cds_WP_000074295.1_1488	0.274735	0.452682	0.25228
lcl|NC_012582.1_cds_WP_000074757.1_595	0.27194	0.467231	0.243302
lcl|NC_012582.1_cds_WP_000075034.1_1271	0.298665	0.57159	0.262363
lcl|NC_012582.1_cds_WP_000075518.1_1579	0.299939	0.530955	0.26474
lcl|NC_012582.1_cds_WP_000075896.1_2100	0.325568	0.668429	0.293552
lcl|NC_012582.1_cds_WP_000076046.1_342	0.302691	0.533826	0.257248
lcl|NC_012582.1_cds_WP_000076153.1_140	0.298387	0.538531	0.262156
lcl|NC_012582.1_cds_WP_000076436.1_2250	0.293323	0.51858	0.261188
lcl|NC_012582.1_cds_WP_000076860.1_1559	0.29299	0.527482	0.258575
lcl|NC_012582.1_cds_WP_000077261.1_1244	0.30736	0.516169	0.255995
lcl|NC_012582.1_cds_WP_000078888.1_251	0.282192	0.510134	0.245619
lcl|NC_012582.1_cds_WP_000079390.1_2308	0.280583	0.535289	0.248656
lcl|NC_012582.1_cds_WP_000080593.1_2711	0.295229	0.537451	0.267052
lcl|NC_012582.1_cds_WP_000080915.1_992	0.265492	0.551623	0.237525
lcl|NC_012582.1_cds_WP_000080930.1_2447	0.297016	0.503861	0.263751
lcl|NC_012582.1_cds_WP_000081715.1_2390	0.303471	0.558609	0.262535
lcl|NC_012582.1_cds_WP_000081944.1_2214	0.282427	0.463849	0.259538
lcl|NC_012582.1_cds_WP_000082298.1_1649	0.26477	0.439707	0.233572
lcl|NC_012582.1_cds_WP_000082626.1_2144	0.303421	0.618399	0.269615
lcl|NC_012582.1_cds_WP_000083183.1_2528	0.308385	0.538708	0.266858
lcl|NC_012582.1_cds_WP_000083540.1_131	0.289018	0.564989	0.257403
lcl|NC_012582.1_cds_WP_000084657.1_54	0.279781	0.462526	0.24309
lcl|NC_012582.1_cds_WP_000085813.1_28	0.262827	0.455435	0.246707
lcl|NC_012582.1_cds_WP_000086051.1_504	0.308544	0.583018	0.269355
lcl|NC_012582.1_cds_WP_000086389.1_2748	0.284366	0.488545	0.251922
lcl|NC_012582.1_cds_WP_000086775.1_2001	0.31109	0.596614	0.272885
lcl|NC_012582.1_cds_WP_000087036.1_1544	0.302473	0.530837	0.259469
lcl|NC_012582.1_cds_WP_000089169.1_1344	0.268012	0.460017	0.226243
lcl|NC_012582.1_cds_WP_000090453.1_2464	0.28299	0.504979	0.250801
lcl|NC_012582.1_cds_WP_000090471.1_401	0.329965	0.711915	0.32458
lcl|NC_012582.1_cds_WP_000090771.1_2581	0.323253	0.636545	0.295698
lcl|NC_012582.1_cds_WP_000091117.1_707	0.301649	0.55761	0.269036
lcl|NC_012582.1_cds_WP_000091135.1_871	0.278953	0.500393	0.238778
lcl|NC_012582.1_cds_WP_000091428.1_67	0.302618	0.568249	0.268152
lcl|NC_012582.1_cds_WP_000091710.1_1061	0.316415	0.749035	0.296057
lcl|NC_012582.1_cds_WP_000091869.1_495	0.31569	0.613848	0.280583
lcl|NC_012582.1_cds_WP_000091926.1_2588	0.304614	0.753988	0.293343
lcl|NC_012582.1_cds_WP_000091952.1_247	0.315597	0.698173	0.285664
lcl|NC_012582.1_cds_WP_000092435.1_2020	0.28458	0.484114	0.238459
lcl|NC_012582.1_cds_WP_000092895.1_2316	0.324387	0.702772	0.294173
lcl|NC_012582.1_cds_WP_000092964.1_2101	0.281239	0.511797	0.250043
lcl|NC_012582.1_cds_WP_000093313.1_1789	0.287763	0.476153	0.247132
lcl|NC_012582.1_cds_WP_000093876.1_1732	0.296899	0.490291	0.260622
lcl|NC_012582.1_cds_WP_000094752.1_1961	0.283668	0.534167	0.269609
lcl|NC_012582.1_cds_WP_000095017.1_1140	0.261234	0.507466	0.22626
lcl|NC_012582.1_cds_WP_000095017.1_1187	0.261234	0.507466	0.22626
lcl|NC_012582.1_cds_WP_000095365.1_2470	0.319228	0.627059	0.272596
lcl|NC_012582.1_cds_WP_000095773.1_474	0.287189	0.518351	0.254613
lcl|NC_012582.1_cds_WP_000095812.1_2721	0.302311	0.56464	0.276395
lcl|NC_012582.1_cds_WP_000096994.1_1792	0.314411	0.596357	0.280358
lcl|NC_012582.1_cds_WP_000097429.1_304	0.303667	0.664647	0.273284
lcl|NC_012582.1_cds_WP_000097777.1_1494	0.322341	0.664704	0.291256
lcl|NC_012582.1_cds_WP_000097999.1_1781	0.27769	0.482882	0.249534
lcl|NC_012582.1_cds_WP_000098149.1_2	0.26339	0.469222	0.22109
lcl|NC_012582.1_cds_WP_000098186.1_892	0.268747	0.418654	0.234203
lcl|NC_012582.1_cds_WP_000098720.1_1155	0.260704	0.439536	0.228979
lcl|NC_012582.1_cds_WP_000098801.1_1043	0.299454	0.642881	0.27545
lcl|NC_012582.1_cds_WP_000098861.1_857	0.291845	0.580186	0.264811
lcl|NC_012582.1_cds_WP_000099130.1_750	0.283538	0.521357	0.254073
lcl|NC_012582.1_cds_WP_000099214.1_166	0.302763	0.629374	0.274802
lcl|NC_012582.1_cds_WP_000099341.1_886	0.309181	0.566484	0.255553
lcl|NC_012582.1_cds_WP_000099574.1_2047	0.291089	0.518715	0.253946
lcl|NC_012582.1_cds_WP_000099767.1_2532	0.333877	0.655651	0.283286
lcl|NC_012582.1_cds_WP_000099888.1_89	0.278926	0.537902	0.240832
lcl|NC_012582.1_cds_WP_000100333.1_2481	0.311384	0.5646	0.277227
lcl|NC_012582.1_cds_WP_000100652.1_65	0.309665	0.567737	0.262679
lcl|NC_012582.1_cds_WP_000100694.1_1681	0.304579	0.62025	0.276191
lcl|NC_012582.1_cds_WP_000100986.1_1131	0.292553	0.535427	0.260072
lcl|NC_012582.1_cds_WP_000100986.1_1196	0.292553	0.535427	0.260072
lcl|NC_012582.1_cds_WP_000101062.1_1346	0.288106	0.441727	0.248043
lcl|NC_012582.1_cds_WP_000101103.1_1981	0.29522	0.496975	0.255063
lcl|NC_012582.1_cds_WP_000101384.1_2035	0.31113	0.578869	0.285069
lcl|NC_012582.1_cds_WP_000101604.1_2583	0.316395	0.590389	0.286409
lcl|NC_012582.1_cds_WP_000101804.1_395	0.314566	0.69638	0.282727
lcl|NC_012582.1_cds_WP_000102510.1_2443	0.322234	0.630757	0.281479
lcl|NC_012582.1_cds_WP_000102804.1_1675	0.30865	0.579229	0.275726
lcl|NC_012582.1_cds_WP_000102995.1_421	0.293095	0.586264	0.264585
lcl|NC_012582.1_cds_WP_000103941.1_1917	0.317448	0.665379	0.272956
lcl|NC_012582.1_cds_WP_000103964.1_2314	0.33788	0.745801	0.290798
lcl|NC_012582.1_cds_WP_000104385.1_1355	0.278	0.506495	0.244168
lcl|NC_012582.1_cds_WP_000104488.1_983	0.280229	0.566736	0.254866
lcl|NC_012582.1_cds_WP_000104840.1_1989	0.285584	0.53787	0.258407
lcl|NC_012582.1_cds_WP_000104914.1_754	0.343728	0.72091	0.310555
lcl|NC_012582.1_cds_WP_000105924.1_1870	0.303772	0.667001	0.2863
lcl|NC_012582.1_cds_WP_000106799.1_2722	0.283375	0.540572	0.250288
lcl|NC_012582.1_cds_WP_000106914.1_1905	0.260833	0.553478	0.25107
lcl|NC_012582.1_cds_WP_000107095.1_1279	0.294611	0.518853	0.255229
lcl|NC_012582.1_cds_WP_000107102.1_660	0.297568	0.559767	0.263631
lcl|NC_012582.1_cds_WP_000107236.1_739	0.314925	0.623676	0.292085
lcl|NC_012582.1_cds_WP_000107912.1_2139	0.259053	0.474855	0.241162
lcl|NC_012582.1_cds_WP_000108084.1_1690	0.305673	0.551248	0.264918
lcl|NC_012582.1_cds_WP_000108383.1_654	0.322084	0.667462	0.290573
lcl|NC_012582.1_cds_WP_000109982.1_794	0.262888	0.425901	0.232136
lcl|NC_012582.1_cds_WP_000110151.1_2745	0.332315	0.759843	0.307057
lcl|NC_012582.1_cds_WP_000111267.1_506	0.320422	0.778766	0.30624
lcl|NC_012582.1_cds_WP_000111361.1_1894	0.281646	0.497525	0.239083
lcl|NC_012582.1_cds_WP_000111639.1_70	0.291708	0.553446	0.260389
lcl|NC_012582.1_cds_WP_000111655.1_2028	0.293124	0.525336	0.257696
lcl|NC_012582.1_cds_WP_000113430.1_1569	0.322436	0.632569	0.274908
lcl|NC_012582.1_cds_WP_000113995.1_2006	0.283656	0.49284	0.238116
lcl|NC_012582.1_cds_WP_000114374.1_155	0.254259	0.489137	0.226928
lcl|NC_012582.1_cds_WP_000114963.1_232	0.280606	0.518337	0.244279
lcl|NC_012582.1_cds_WP_000115010.1_130	0.318897	0.635616	0.273213
lcl|NC_012582.1_cds_WP_000115021.1_231	0.264536	0.453773	0.24663
lcl|NC_012582.1_cds_WP_000115055.1_2431	0.30777	0.606863	0.259153
lcl|NC_012582.1_cds_WP_000115823.1_1765	0.273564	0.470373	0.235087
lcl|NC_012582.1_cds_WP_000115900.1_1629	0.27199	0.532933	0.241918
lcl|NC_012582.1_cds_WP_000116364.1_2747	0.292583	0.465299	0.265049
lcl|NC_012582.1_cds_WP_000116550.1_73	0.30827	0.571848	0.274793
lcl|NC_012582.1_cds_WP_000116738.1_536	0.317308	0.58635	0.278206
lcl|NC_012582.1_cds_WP_000117272.1_2208	0.287747	0.5094	0.258286
lcl|NC_012582.1_cds_WP_000117645.1_277	0.277629	0.454124	0.238445
lcl|NC_012582.1_cds_WP_000117768.1_2198	0.290899	0.521569	0.252121
lcl|NC_012582.1_cds_WP_000117911.1_1687	0.292021	0.543768	0.259826
lcl|NC_012582.1_cds_WP_000118016.1_2377	0.280453	0.502845	0.246015
lcl|NC_012582.1_cds_WP_000118232.1_419	0.291339	0.535999	0.264214
lcl|NC_012582.1_cds_WP_000118596.1_968	0.309195	0.620386	0.281116
lcl|NC_012582.1_cds_WP_000119661.1_2104	0.285823	0.587557	0.258056
lcl|NC_012582.1_cds_WP_000119813.1_528	0.271456	0.549909	0.237984
lcl|NC_012582.1_cds_WP_000120276.1_2326	0.277726	0.504138	0.24606
lcl|NC_012582.1_cds_WP_000120286.1_1774	0.303408	0.492122	0.254007
lcl|NC_012582.1_cds_WP_000120804.1_1020	0.278593	0.518478	0.248205
lcl|NC_012582.1_cds_WP_000121059.1_1370	0.27839	0.56355	0.26146
lcl|NC_012582.1_cds_WP_000121678.1_1967	0.321672	0.623101	0.287864
lcl|NC_012582.1_cds_WP_000121736.1_101	0.289189	0.568687	0.266998
lcl|NC_012582.1_cds_WP_000122113.1_607	0.302697	0.583429	0.265224
lcl|NC_012582.1_cds_WP_000122825.1_2227	0.315063	0.613133	0.262833
lcl|NC_012582.1_cds_WP_000123084.1_1886	0.281752	0.550908	0.261129
lcl|NC_012582.1_cds_WP_000124575.1_1587	0.329409	0.748081	0.295523
lcl|NC_012582.1_cds_WP_000124738.1_480	0.313785	0.600649	0.272559
lcl|NC_012582.1_cds_WP_000125077.1_328	0.255034	0.497786	0.219946
lcl|NC_012582.1_cds_WP_000125384.1_2231	0.281816	0.432761	0.233143
lcl|NC_012582.1_cds_WP_000125574.1_335	0.281926	0.549847	0.256575
lcl|NC_012582.1_cds_WP_000126179.1_1586	0.271557	0.459236	0.230684
lcl|NC_012582.1_cds_WP_000126820.1_1485	0.328002	0.594741	0.295953
lcl|NC_012582.1_cds_WP_000126995.1_2445	0.276063	0.536103	0.240662
lcl|NC_012582.1_cds_WP_000127220.1_2423	0.304293	0.585871	0.274347
lcl|NC_012582.1_cds_WP_000127369.1_369	0.299153	0.53194	0.260904
lcl|NC_012582.1_cds_WP_000127537.1_2729	0.285686	0.532177	0.246806
lcl|NC_012582.1_cds_WP_000127634.1_1082	0.275595	0.4837	0.222986
lcl|NC_012582.1_cds_WP_000127681.1_82	0.2814	0.502664	0.263173
lcl|NC_012582.1_cds_WP_000128764.1_659	0.344939	0.744406	0.309711
lcl|NC_012582.1_cds_WP_000129752.1_532	0.292119	0.534246	0.257582
lcl|NC_012582.1_cds_WP_000129777.1_2279	0.290504	0.530815	0.252159
lcl|NC_012582.1_cds_WP_000130284.1_696	0.294414	0.537771	0.262821
lcl|NC_012582.1_cds_WP_000130332.1_1966	0.328098	0.67755	0.285254
lcl|NC_012582.1_cds_WP_000130345.1_60	0.321441	0.632087	0.292661
lcl|NC_012582.1_cds_WP_000130773.1_2162	0.312145	0.553101	0.269583
lcl|NC_012582.1_cds_WP_000131542.1_579	0.292566	0.556558	0.25757
lcl|NC_012582.1_cds_WP_000131945.1_1064	0.280685	0.484372	0.255319
lcl|NC_012582.1_cds_WP_000132105.1_2466	0.287967	0.487014	0.24302
lcl|NC_012582.1_cds_WP_000132138.1_2501	0.319128	0.613722	0.282785
lcl|NC_012582.1_cds_WP_000132160.1_22	0.264827	0.44961	0.242491
lcl|NC_012582.1_cds_WP_000132365.1_1813	0.2815	0.506043	0.246027
lcl|NC_012582.1_cds_WP_000132408.1_2187	0.29766	0.562329	0.264303
lcl|NC_012582.1_cds_WP_000132411.1_2487	0.28499	0.509167	0.248788
lcl|NC_012582.1_cds_WP_000132452.1_2490	0.285228	0.540124	0.241137
lcl|NC_012582.1_cds_WP_000132703.1_94	0.327677	0.622283	0.2921
lcl|NC_012582.1_cds_WP_000133005.1_2009	0.271001	0.465863	0.250005
lcl|NC_012582.1_cds_WP_000133012.1_1911	0.285269	0.540751	0.257072
lcl|NC_012582.1_cds_WP_000133891.1_1772	0.29505	0.540199	0.253476
lcl|NC_012582.1_cds_WP_000135052.1_2709	0.3462	0.744916	0.332479
lcl|NC_012582.1_cds_WP_000135216.1_2579	0.324571	0.702239	0.309237
lcl|NC_012582.1_cds_WP_000135483.1_2221	0.292517	0.551251	0.254547
lcl|NC_012582.1_cds_WP_000135543.1_1381	0.294546	0.519755	0.246651
lcl|NC_012582.1_cds_WP_000136718.1_34	0.313025	0.614809	0.282286
lcl|NC_012582.1_cds_WP_000138174.1_2732	0.30166	0.555863	0.258713
lcl|NC_012582.1_cds_WP_000139762.1_1575	0.29543	0.527845	0.26679
lcl|NC_012582.1_cds_WP_000139795.1_2444	0.300041	0.562332	0.259104
lcl|NC_012582.1_cds_WP_000140318.1_1960	0.328321	0.811297	0.314194
lcl|NC_012582.1_cds_WP_000140367.1_592	0.313151	0.611181	0.280812
lcl|NC_012582.1_cds_WP_000141022.1_61	0.302292	0.525648	0.268512
lcl|NC_012582.1_cds_WP_000141550.1_984	0.284433	0.520773	0.257368
lcl|NC_012582.1_cds_WP_000141836.1_327	0.300063	0.489301	0.272502
lcl|NC_012582.1_cds_WP_000143339.1_2042	0.315215	0.554179	0.27617
lcl|NC_012582.1_cds_WP_000143763.1_152	0.307107	0.457071	0.274672
lcl|NC_012582.1_cds_WP_000144235.1_2052	0.304092	0.465382	0.281658
lcl|NC_012582.1_cds_WP_000145254.1_145	0.308462	0.597077	0.281598
lcl|NC_012582.1_cds_WP_000145786.1_2232	0.295622	0.562867	0.257467
lcl|NC_012582.1_cds_WP_000146408.1_2343	0.289182	0.525399	0.257052
lcl|NC_012582.1_cds_WP_000146463.1_1316	0.291545	0.538116	0.268354
lcl|NC_012582.1_cds_WP_000146472.1_625	0.297387	0.582912	0.267672
lcl|NC_012582.1_cds_WP_000147064.1_909	0.286449	0.523754	0.251362
lcl|NC_012582.1_cds_WP_000147148.1_636	0.284876	0.56408	0.267153
lcl|NC_012582.1_cds_WP_000148675.1_1835	0.280764	0.476451	0.244597
lcl|NC_012582.1_cds_WP_000148780.1_549	0.243523	0.451445	0.235814
lcl|NC_012582.1_cds_WP_000149570.1_2686	0.294307	0.562543	0.264954
lcl|NC_012582.1_cds_WP_000149578.1_1036	0.2785	0.516692	0.24899
lcl|NC_012582.1_cds_WP_000150128.1_2623	0.285565	0.503686	0.255398
lcl|NC_012582.1_cds_WP_000151221.1_2125	0.32756	0.736651	0.294723
lcl|NC_012582.1_cds_WP_000151466.1_310	0.314878	0.639717	0.278322
lcl|NC_012582.1_cds_WP_000152368.1_1612	0.2879	0.583733	0.247023
lcl|NC_012582.1_cds_WP_000152805.1_2414	0.304765	0.555187	0.259014
lcl|NC_012582.1_cds_WP_000152997.1_1582	0.264644	0.481587	0.231955
lcl|NC_012582.1_cds_WP_000153496.1_2039	0.332685	0.842719	0.321245
lcl|NC_012582.1_cds_WP_000154827.1_2219	0.304486	0.601447	0.259674
lcl|NC_012582.1_cds_WP_000154857.1_783	0.270417	0.48229	0.248784
lcl|NC_012582.1_cds_WP_000155078.1_2128	0.339762	0.69292	0.305446
lcl|NC_012582.1_cds_WP_000155485.1_379	0.279874	0.519463	0.246484
lcl|NC_012582.1_cds_WP_000155556.1_422	0.280974	0.493189	0.240446
lcl|NC_012582.1_cds_WP_000157055.1_970	0.265698	0.560396	0.227702
lcl|NC_012582.1_cds_WP_000157114.1_867	0.301038	0.511458	0.276633
lcl|NC_012582.1_cds_WP_000157297.1_1097	0.336499	0.446779	0.287095
lcl|NC_012582.1_cds_WP_000157297.1_1230	0.336499	0.446779	0.287095
lcl|NC_012582.1_cds_WP_000157742.1_352	0.279611	0.515497	0.242422
lcl|NC_012582.1_cds_WP_000157902.1_2317	0.325887	0.707783	0.289206
lcl|NC_012582.1_cds_WP_000158209.1_1110	0.286463	0.564958	0.257874
lcl|NC_012582.1_cds_WP_000158209.1_1217	0.286463	0.564958	0.257874
lcl|NC_012582.1_cds_WP_000158369.1_1788	0.26989	0.512196	0.243303
lcl|NC_012582.1_cds_WP_000160066.1_653	0.280484	0.511123	0.252353
lcl|NC_012582.1_cds_WP_000161719.1_1993	0.311605	0.602667	0.273992
lcl|NC_012582.1_cds_WP_000162645.1_374	0.28453	0.494911	0.245196
lcl|NC_012582.1_cds_WP_000162689.1_829	0.312668	0.655534	0.284812
lcl|NC_012582.1_cds_WP_000162865.1_2442	0.313337	0.607809	0.266439
lcl|NC_012582.1_cds_WP_000163079.1_314	0.281955	0.533821	0.249284
lcl|NC_012582.1_cds_WP_000164597.1_752	0.309928	0.652893	0.275423
lcl|NC_012582.1_cds_WP_000166627.1_180	0.288069	0.534992	0.265972
lcl|NC_012582.1_cds_WP_000167257.1_620	0.320977	0.609996	0.284179
lcl|NC_012582.1_cds_WP_000167341.1_1959	0.288448	0.518967	0.255149
lcl|NC_012582.1_cds_WP_000167389.1_949	0.290521	0.492464	0.264605
lcl|NC_012582.1_cds_WP_000167428.1_1302	0.289119	0.532721	0.251196
lcl|NC_012582.1_cds_WP_000168154.1_121	0.295262	0.532299	0.242354
lcl|NC_012582.1_cds_WP_000168289.1_427	0.333409	0.61907	0.285705
lcl|NC_012582.1_cds_WP_000169395.1_1442	0.292092	0.534435	0.254812
lcl|NC_012582.1_cds_WP_000169466.1_2412	0.297667	0.50367	0.261172
lcl|NC_012582.1_cds_WP_000169476.1_999	0.316355	0.6901	0.285048
lcl|NC_012582.1_cds_WP_000170058.1_2520	0.31504	0.754781	0.28958
lcl|NC_012582.1_cds_WP_000170632.1_1524	0.246054	0.487442	0.22993
lcl|NC_012582.1_cds_WP_000170632.1_1531	0.246054	0.487442	0.22993
lcl|NC_012582.1_cds_WP_000170634.1_1517	0.295673	0.495828	0.268186
lcl|NC_012582.1_cds_WP_000171170.1_865	0.311219	0.585606	0.27652
lcl|NC_012582.1_cds_WP_000171811.1_1663	0.278699	0.507657	0.245126
lcl|NC_012582.1_cds_WP_000173767.1_1609	0.284975	0.46977	0.251699
lcl|NC_012582.1_cds_WP_000175211.1_1076	0.278833	0.480463	0.245104
lcl|NC_012582.1_cds_WP_000175325.1_1603	0.297405	0.542435	0.271213
lcl|NC_012582.1_cds_WP_000175326.1_2499	0.294743	0.455336	0.247427
lcl|NC_012582.1_cds_WP_000175479.1_1482	0.28404	0.498212	0.253022
lcl|NC_012582.1_cds_WP_000176892.1_721	0.318447	0.684202	0.286797
lcl|NC_012582.1_cds_WP_000177568.1_535	0.279637	0.504754	0.248274
lcl|NC_012582.1_cds_WP_000178338.1_2567	0.30562	0.629974	0.267613
lcl|NC_012582.1_cds_WP_000178532.1_452	0.312172	0.61478	0.2723
lcl|NC_012582.1_cds_WP_000178705.1_2454	0.315543	0.58634	0.292696
lcl|NC_012582.1_cds_WP_000179037.1_2138	0.331811	0.709403	0.291948
lcl|NC_012582.1_cds_WP_000179228.1_2286	0.330359	0.79096	0.323452
lcl|NC_012582.1_cds_WP_000180252.1_682	0.289661	0.528152	0.245219
lcl|NC_012582.1_cds_WP_000182819.1_2495	0.299062	0.570625	0.257618
lcl|NC_012582.1_cds_WP_000183814.1_63	0.278756	0.559818	0.254251
lcl|NC_012582.1_cds_WP_000184115.1_1876	0.280715	0.486969	0.248672
lcl|NC_012582.1_cds_WP_000184359.1_31	0.309955	0.623402	0.276143
lcl|NC_012582.1_cds_WP_000184782.1_400	0.240527	0.427856	0.19412
lcl|NC_012582.1_cds_WP_000185039.1_2658	0.309428	0.547065	0.263679
lcl|NC_012582.1_cds_WP_000186150.1_1851	0.296476	0.420786	0.25736
lcl|NC_012582.1_cds_WP_000186559.1_2203	0.279616	0.522074	0.241814
lcl|NC_012582.1_cds_WP_000186581.1_1411	0.305945	0.581589	0.265043
lcl|NC_012582.1_cds_WP_000186592.1_1750	0.263239	0.407145	0.2297
lcl|NC_012582.1_cds_WP_000186700.1_1936	0.282088	0.463893	0.231666
lcl|NC_012582.1_cds_WP_000187051.1_2158	0.306955	0.537892	0.283098
lcl|NC_012582.1_cds_WP_000187372.1_481	0.288394	0.50977	0.258327
lcl|NC_012582.1_cds_WP_000187388.1_846	0.293839	0.503379	0.248935
lcl|NC_012582.1_cds_WP_000187995.1_567	0.286997	0.464631	0.228168
lcl|NC_012582.1_cds_WP_000188027.1_524	0.277027	0.498276	0.250692
lcl|NC_012582.1_cds_WP_000188337.1_2614	0.281322	0.485145	0.250015
lcl|NC_012582.1_cds_WP_000188676.1_2669	0.275997	0.480296	0.240736
lcl|NC_012582.1_cds_WP_000189091.1_2622	0.287866	0.515276	0.253923
lcl|NC_012582.1_cds_WP_000189439.1_775	0.302853	0.609625	0.272832
lcl|NC_012582.1_cds_WP_000189625.1_141	0.303923	0.525186	0.271337
lcl|NC_012582.1_cds_WP_000189749.1_2491	0.317845	0.696355	0.279981
lcl|NC_012582.1_cds_WP_000190444.1_436	0.284443	0.465976	0.253132
lcl|NC_012582.1_cds_WP_000190491.1_188	0.347483	0.739229	0.313256
lcl|NC_012582.1_cds_WP_000190699.1_214	0.324567	0.688409	0.290047
lcl|NC_012582.1_cds_WP_000190761.1_1416	0.283431	0.479938	0.252529
lcl|NC_012582.1_cds_WP_000191995.1_2192	0.292282	0.556475	0.258804
lcl|NC_012582.1_cds_WP_000192207.1_638	0.334039	0.742537	0.304921
lcl|NC_012582.1_cds_WP_000192300.1_380	0.271322	0.420321	0.228116
lcl|NC_012582.1_cds_WP_000192370.1_969	0.267593	0.503775	0.240504
lcl|NC_012582.1_cds_WP_000193249.1_1151	0.29192	0.525649	0.254932
lcl|NC_012582.1_cds_WP_000193324.1_2611	0.315286	0.550049	0.265811
lcl|NC_012582.1_cds_WP_000193736.1_1415	0.319279	0.569867	0.285899
lcl|NC_012582.1_cds_WP_000194270.1_2465	0.289889	0.500143	0.252562
lcl|NC_012582.1_cds_WP_000194594.1_1268	0.309863	0.572983	0.278601
lcl|NC_012582.1_cds_WP_000195227.1_458	0.272341	0.497909	0.248484
lcl|NC_012582.1_cds_WP_000196490.1_1626	0.285886	0.525299	0.255835
lcl|NC_012582.1_cds_WP_000196857.1_1937	0.321622	0.585603	0.279196
lcl|NC_012582.1_cds_WP_000197283.1_596	0.292413	0.508298	0.250682
lcl|NC_012582.1_cds_WP_000197425.1_2084	0.267013	0.470025	0.226866
lcl|NC_012582.1_cds_WP_000197615.1_691	0.287124	0.503354	0.245167
lcl|NC_012582.1_cds_WP_000200008.1_1456	0.287017	0.454832	0.249023
lcl|NC_012582.1_cds_WP_000200581.1_903	0.304366	0.601387	0.257885
lcl|NC_012582.1_cds_WP_000200622.1_995	0.290032	0.512417	0.249552
lcl|NC_012582.1_cds_WP_000200904.1_812	0.307934	0.44566	0.241575
lcl|NC_012582.1_cds_WP_000201010.1_2352	0.288379	0.526249	0.264684
lcl|NC_012582.1_cds_WP_000201014.1_1777	0.323604	0.638826	0.280483
lcl|NC_012582.1_cds_WP_000201159.1_2585	0.328345	0.706431	0.309256
lcl|NC_012582.1_cds_WP_000201237.1_393	0.317341	0.756391	0.293854
lcl|NC_012582.1_cds_WP_000202050.1_1175	0.281993	0.5184	0.252235
lcl|NC_012582.1_cds_WP_000204546.1_1439	0.305182	0.580775	0.267832
lcl|NC_012582.1_cds_WP_000205542.1_756	0.281625	0.48708	0.242695
lcl|NC_012582.1_cds_WP_000205956.1_174	0.306474	0.547103	0.266431
lcl|NC_012582.1_cds_WP_000206078.1_741	0.309456	0.599532	0.263738
lcl|NC_012582.1_cds_WP_000206218.1_1019	0.30701	0.644775	0.272452
lcl|NC_012582.1_cds_WP_000206865.1_1492	0.313573	0.6523	0.277115
lcl|NC_012582.1_cds_WP_000207198.1_2441	0.313076	0.550395	0.274405
lcl|NC_012582.1_cds_WP_000207270.1_1933	0.305781	0.549789	0.273762
lcl|NC_012582.1_cds_WP_000208249.1_2678	0.309236	0.630833	0.267107
lcl|NC_012582.1_cds_WP_000208357.1_1922	0.29967	0.557817	0.261516
lcl|NC_012582.1_cds_WP_000210023.1_2276	0.284701	0.576367	0.245784
lcl|NC_012582.1_cds_WP_000210548.1_2284	0.335977	0.674423	0.291998
lcl|NC_012582.1_cds_WP_000210573.1_2299	0.305715	0.601205	0.263166
lcl|NC_012582.1_cds_WP_000210846.1_2461	0.329443	0.717549	0.29596
lcl|NC_012582.1_cds_WP_000211023.1_705	0.32859	0.67848	0.298689
lcl|NC_012582.1_cds_WP_000211036.1_611	0.313929	0.592144	0.282846
lcl|NC_012582.1_cds_WP_000211151.1_2743	0.348283	0.763672	0.310348
lcl|NC_012582.1_cds_WP_000212118.1_1468	0.287765	0.531334	0.259273
lcl|NC_012582.1_cds_WP_000212218.1_27	0.323297	0.606767	0.290042
lcl|NC_012582.1_cds_WP_000213241.1_2685	0.276966	0.523914	0.251958
lcl|NC_012582.1_cds_WP_000213463.1_47	0.306634	0.598422	0.267981
lcl|NC_012582.1_cds_WP_000213731.1_2200	0.274921	0.494461	0.259631
lcl|NC_012582.1_cds_WP_000213836.1_1837	0.278449	0.431598	0.245173
lcl|NC_012582.1_cds_WP_000213921.1_1760	0.300581	0.613001	0.270812
lcl|NC_012582.1_cds_WP_000215322.1_1046	0.283603	0.483752	0.239834
lcl|NC_012582.1_cds_WP_000215482.1_2625	0.308673	0.618796	0.263852
lcl|NC_012582.1_cds_WP_000215768.1_124	0.257979	0.537191	0.243784
lcl|NC_012582.1_cds_WP_000215857.1_1300	0.270308	0.47479	0.232306
lcl|NC_012582.1_cds_WP_000216113.1_1363	0.310371	0.623037	0.279575
lcl|NC_012582.1_cds_WP_000216841.1_2244	0.333261	0.704822	0.294832
lcl|NC_012582.1_cds_WP_000217613.1_2737	0.321918	0.704692	0.282416
lcl|NC_012582.1_cds_WP_000218155.1_2627	0.31577	0.660329	0.284228
lcl|NC_012582.1_cds_WP_000218963.1_804	0.28871	0.554055	0.258877
lcl|NC_012582.1_cds_WP_000219805.1_2074	0.25809	0.481532	0.243152
lcl|NC_012582.1_cds_WP_000220370.1_1356	0.328544	0.716578	0.302501
lcl|NC_012582.1_cds_WP_000222789.1_348	0.260522	0.453457	0.219933
lcl|NC_012582.1_cds_WP_000224052.1_2699	0.31873	0.723715	0.296613
lcl|NC_012582.1_cds_WP_000224452.1_2680	0.294046	0.548559	0.256833
lcl|NC_012582.1_cds_WP_000224703.1_43	0.307738	0.544354	0.255491
lcl|NC_012582.1_cds_WP_000224887.1_2362	0.3514	0.770611	0.310237
lcl|NC_012582.1_cds_WP_000226382.1_1616	0.28283	0.441083	0.224434
lcl|NC_012582.1_cds_WP_000226753.1_181	0.276378	0.505296	0.231396
lcl|NC_012582.1_cds_WP_000226858.1_2463	0.298837	0.567994	0.2677
lcl|NC_012582.1_cds_WP_000227833.1_1050	0.283446	0.49104	0.248773
lcl|NC_012582.1_cds_WP_000228449.1_2082	0.285534	0.502642	0.247989
lcl|NC_012582.1_cds_WP_000228497.1_1950	0.303764	0.492769	0.253787
lcl|NC_012582.1_cds_WP_000229271.1_1652	0.284625	0.509056	0.237278
lcl|NC_012582.1_cds_WP_000229931.1_945	0.257751	0.448006	0.23198
lcl|NC_012582.1_cds_WP_000230248.1_708	0.292182	0.530188	0.261472
lcl|NC_012582.1_cds_WP_000233072.1_2089	0.293906	0.484467	0.260157
lcl|NC_012582.1_cds_WP_000233105.1_1826	0.292487	0.500627	0.261168
lcl|NC_012582.1_cds_WP_000234181.1_1925	0.285002	0.525915	0.243495
lcl|NC_012582.1_cds_WP_000234820.1_1946	0.29337	0.523864	0.262292
lcl|NC_012582.1_cds_WP_000236673.1_1473	0.266809	0.505427	0.240517
lcl|NC_012582.1_cds_WP_000236731.1_288	0.260338	0.444802	0.208515
lcl|NC_012582.1_cds_WP_000238620.1_2129	0.28589	0.544074	0.260563
lcl|NC_012582.1_cds_WP_000240593.1_1491	0.280037	0.562194	0.261165
lcl|NC_012582.1_cds_WP_000242748.1_2621	0.331335	0.723303	0.304879
lcl|NC_012582.1_cds_WP_000244078.1_2048	0.298725	0.498717	0.260984
lcl|NC_012582.1_cds_WP_000244647.1_718	0.338195	0.852695	0.321633
lcl|NC_012582.1_cds_WP_000244705.1_2744	0.278466	0.529712	0.240612
lcl|NC_012582.1_cds_WP_000245175.1_757	0.279671	0.505687	0.258268
lcl|NC_012582.1_cds_WP_000245202.1_364	0.294931	0.612807	0.258376
lcl|NC_012582.1_cds_WP_000246045.1_1122	0.311754	0.53208	0.292984
lcl|NC_012582.1_cds_WP_000246045.1_1205	0.311754	0.53208	0.292984
lcl|NC_012582.1_cds_WP_000246893.1_2663	0.317967	0.727465	0.286622
lcl|NC_012582.1_cds_WP_000248088.1_2698	0.286083	0.455882	0.246513
lcl|NC_012582.1_cds_WP_000248446.1_2176	0.286853	0.48001	0.253063
lcl|NC_012582.1_cds_WP_000249403.1_747	0.31948	0.629138	0.268941
lcl|NC_012582.1_cds_WP_000250605.1_2325	0.281728	0.484543	0.248058
lcl|NC_012582.1_cds_WP_000251292.1_500	0.296583	0.589806	0.267254
lcl|NC_012582.1_cds_WP_000251590.1_2406	0.294988	0.550028	0.239049
lcl|NC_012582.1_cds_WP_000251661.1_354	0.294205	0.512461	0.261429
lcl|NC_012582.1_cds_WP_000251901.1_1475	0.283055	0.377681	0.255581
lcl|NC_012582.1_cds_WP_000251960.1_115	0.266444	0.46004	0.22092
lcl|NC_012582.1_cds_WP_000252165.1_712	0.282603	0.508624	0.242926
lcl|NC_012582.1_cds_WP_000252417.1_640	0.310126	0.592826	0.264159
lcl|NC_012582.1_cds_WP_000252812.1_431	0.249712	0.399931	0.195069
lcl|NC_012582.1_cds_WP_000253201.1_1164	0.294927	0.537268	0.256396
lcl|NC_012582.1_cds_WP_000253641.1_2027	0.276133	0.47783	0.245679
lcl|NC_012582.1_cds_WP_000256449.1_560	0.323321	0.762149	0.314208
lcl|NC_012582.1_cds_WP_000257304.1_573	0.317267	0.603182	0.300622
lcl|NC_012582.1_cds_WP_000257380.1_1972	0.281707	0.539609	0.257662
lcl|NC_012582.1_cds_WP_000257617.1_688	0.288505	0.501999	0.237601
lcl|NC_012582.1_cds_WP_000258536.1_1819	0.27601	0.449142	0.237175
lcl|NC_012582.1_cds_WP_000259895.1_1593	0.298116	0.57019	0.267808
lcl|NC_012582.1_cds_WP_000262309.1_1658	0.29406	0.499761	0.250932
lcl|NC_012582.1_cds_WP_000262779.1_102	0.274669	0.503353	0.23997
lcl|NC_012582.1_cds_WP_000263119.1_362	0.340336	0.735574	0.308096
lcl|NC_012582.1_cds_WP_000264262.1_706	0.307672	0.585363	0.273553
lcl|NC_012582.1_cds_WP_000264687.1_406	0.281663	0.41142	0.234611
lcl|NC_012582.1_cds_WP_000266113.1_2096	0.252327	0.462031	0.220333
lcl|NC_012582.1_cds_WP_000266240.1_1293	0.260145	0.473793	0.242522
lcl|NC_012582.1_cds_WP_000266717.1_888	0.289484	0.531922	0.247578
lcl|NC_012582.1_cds_WP_000266826.1_896	0.281439	0.470948	0.227412
lcl|NC_012582.1_cds_WP_000266864.1_2090	0.296386	0.546044	0.259085
lcl|NC_012582.1_cds_WP_000267456.1_1594	0.294	0.521409	0.248198
lcl|NC_012582.1_cds_WP_000268537.1_2344	0.303682	0.65719	0.292059
lcl|NC_012582.1_cds_WP_000269343.1_2727	0.290438	0.503813	0.251154
lcl|NC_012582.1_cds_WP_000270017.1_562	0.296622	0.520242	0.256458
lcl|NC_012582.1_cds_WP_000270200.1_1095	0.303786	0.618598	0.277653
lcl|NC_012582.1_cds_WP_000270200.1_1232	0.303786	0.618598	0.277653
lcl|NC_012582.1_cds_WP_000270285.1_1889	0.276874	0.514857	0.257755
lcl|NC_012582.1_cds_WP_000270410.1_1758	0.29395	0.61619	0.263894
lcl|NC_012582.1_cds_WP_000271062.1_585	0.299474	0.539337	0.262946
lcl|NC_012582.1_cds_WP_000271133.1_963	0.302606	0.586399	0.256806
lcl|NC_012582.1_cds_WP_000271393.1_465	0.313048	0.816289	0.285098
lcl|NC_012582.1_cds_WP_000272895.1_2207	0.311352	0.541931	0.278114
lcl|NC_012582.1_cds_WP_000273042.1_2374	0.276343	0.485951	0.230026
lcl|NC_012582.1_cds_WP_000273061.1_936	0.2891	0.729747	0.287177
lcl|NC_012582.1_cds_WP_000275574.1_14	0.291985	0.538449	0.259472
lcl|NC_012582.1_cds_WP_000276487.1_457	0.258264	0.545984	0.231156
lcl|NC_012582.1_cds_WP_000277074.1_1779	0.261398	0.51149	0.219084
lcl|NC_012582.1_cds_WP_000277401.1_1420	0.309261	0.579243	0.279581
lcl|NC_012582.1_cds_WP_000277613.1_1055	0.304901	0.718844	0.285316
lcl|NC_012582.1_cds_WP_000279340.1_32	0.265302	0.501987	0.227192
lcl|NC_012582.1_cds_WP_000279435.1_2241	0.286061	0.482584	0.235838
lcl|NC_012582.1_cds_WP_000280450.1_2710	0.304478	0.567175	0.268662
lcl|NC_012582.1_cds_WP_000281100.1_2458	0.277615	0.453674	0.248041
lcl|NC_012582.1_cds_WP_000281360.1_433	0.273316	0.457246	0.237209
lcl|NC_012582.1_cds_WP_000281794.1_2046	0.279013	0.460689	0.233752
lcl|NC_012582.1_cds_WP_000283242.1_854	0.295088	0.522221	0.253409
lcl|NC_012582.1_cds_WP_000283414.1_2033	0.296598	0.567823	0.258858
lcl|NC_012582.1_cds_WP_000284054.1_2257	0.318617	0.656213	0.269563
lcl|NC_012582.1_cds_WP_000284384.1_586	0.289365	0.545777	0.247356
lcl|NC_012582.1_cds_WP_000285476.1_1320	0.277771	0.480233	0.2479
lcl|NC_012582.1_cds_WP_000286625.1_714	0.289892	0.525162	0.246178
lcl|NC_012582.1_cds_WP_000287010.1_2063	0.294281	0.625848	0.261508
lcl|NC_012582.1_cds_WP_000287237.1_822	0.272258	0.440497	0.242154
lcl|NC_012582.1_cds_WP_000287742.1_2483	0.292467	0.579386	0.264228
lcl|NC_012582.1_cds_WP_000288439.1_1692	0.278391	0.505021	0.23834
lcl|NC_012582.1_cds_WP_000288841.1_44	0.288044	0.482729	0.227875
lcl|NC_012582.1_cds_WP_000289662.1_879	0.283425	0.534971	0.237599
lcl|NC_012582.1_cds_WP_000289970.1_2058	0.253026	0.372043	0.189806
lcl|NC_012582.1_cds_WP_000290080.1_1840	0.276493	0.447779	0.235736
lcl|NC_012582.1_cds_WP_000290371.1_2180	0.334596	0.737339	0.299855
lcl|NC_012582.1_cds_WP_000290380.1_2218	0.309829	0.630464	0.263616
lcl|NC_012582.1_cds_WP_000290511.1_1707	0.280651	0.484978	0.241867
lcl|NC_012582.1_cds_WP_000290732.1_2065	0.336354	0.744418	0.318655
lcl|NC_012582.1_cds_WP_000291355.1_1588	0.315447	0.614841	0.272107
lcl|NC_012582.1_cds_WP_000301490.1_2285	0.314122	0.784783	0.318018
lcl|NC_012582.1_cds_WP_000301571.1_734	0.304729	0.564579	0.249042
lcl|NC_012582.1_cds_WP_000301909.1_1816	0.295544	0.535414	0.254033
lcl|NC_012582.1_cds_WP_000312310.1_2346	0.269052	0.495972	0.244764
lcl|NC_012582.1_cds_WP_000312387.1_1447	0.256818	0.491639	0.246356
lcl|NC_012582.1_cds_WP_000312460.1_383	0.326849	0.613111	0.277221
lcl|NC_012582.1_cds_WP_000312986.1_2345	0.317692	0.666218	0.289291
lcl|NC_012582.1_cds_WP_000331318.1_2427	0.286032	0.505686	0.24759
lcl|NC_012582.1_cds_WP_000331703.1_733	0.296497	0.711443	0.269918
lcl|NC_012582.1_cds_WP_000331860.1_1314	0.320085	0.670718	0.285588
lcl|NC_012582.1_cds_WP_000332942.1_1971	0.285008	0.487188	0.245449
lcl|NC_012582.1_cds_WP_000333273.1_322	0.287964	0.451225	0.250659
lcl|NC_012582.1_cds_WP_000333364.1_2256	0.299528	0.475503	0.243992
lcl|NC_012582.1_cds_WP_000334126.1_515	0.306181	0.608423	0.274256
lcl|NC_012582.1_cds_WP_000334237.1_972	0.310988	0.603158	0.261402
lcl|NC_012582.1_cds_WP_000335750.1_230	0.264142	0.529185	0.234621
lcl|NC_012582.1_cds_WP_000337016.1_960	0.304328	0.615348	0.271362
lcl|NC_012582.1_cds_WP_000337335.1_1027	0.303498	0.558475	0.26844
lcl|NC_012582.1_cds_WP_000337457.1_998	0.283527	0.511005	0.254997
lcl|NC_012582.1_cds_WP_000340098.1_581	0.313276	0.629783	0.269335
lcl|NC_012582.1_cds_WP_000340296.1_2704	0.280378	0.485051	0.248503
lcl|NC_012582.1_cds_WP_000340821.1_869	0.301759	0.531862	0.269469
lcl|NC_012582.1_cds_WP_000340986.1_557	0.294826	0.512119	0.256587
lcl|NC_012582.1_cds_WP_000342512.1_2269	0.271541	0.465043	0.239192
lcl|NC_012582.1_cds_WP_000344156.1_544	0.333384	0.716709	0.294609
lcl|NC_012582.1_cds_WP_000345929.1_464	0.316927	0.610954	0.281064
lcl|NC_012582.1_cds_WP_000347798.1_1908	0.269703	0.474838	0.234924
lcl|NC_012582.1_cds_WP_000348347.1_2249	0.295006	0.509661	0.280221
lcl|NC_012582.1_cds_WP_000348847.1_551	0.294268	0.522039	0.257283
lcl|NC_012582.1_cds_WP_000349088.1_2361	0.295841	0.545872	0.253811
lcl|NC_012582.1_cds_WP_000349528.1_76	0.308023	0.541185	0.287125
lcl|NC_012582.1_cds_WP_000350068.1_1924	0.327987	0.59881	0.291453
lcl|NC_012582.1_cds_WP_000350079.1_994	0.309087	0.585397	0.27932
lcl|NC_012582.1_cds_WP_000350101.1_1818	0.318679	0.620669	0.28083
lcl|NC_012582.1_cds_WP_000350195.1_491	0.299194	0.562722	0.265751
lcl|NC_012582.1_cds_WP_000350250.1_1807	0.299647	0.590178	0.265624
lcl|NC_012582.1_cds_WP_000351118.1_1493	0.278787	0.616579	0.242293
lcl|NC_012582.1_cds_WP_000351233.1_45	0.288137	0.495162	0.250918
lcl|NC_012582.1_cds_WP_000354544.1_2706	0.301525	0.620742	0.27368
lcl|NC_012582.1_cds_WP_000354569.1_2141	0.273894	0.451082	0.238622
lcl|NC_012582.1_cds_WP_000354613.1_334	0.300031	0.747571	0.294549
lcl|NC_012582.1_cds_WP_000354943.1_2347	0.282737	0.468922	0.248694
lcl|NC_012582.1_cds_WP_000355517.1_1871	0.275507	0.500497	0.235878
lcl|NC_012582.1_cds_WP_000357704.1_424	0.308806	0.547436	0.268598
lcl|NC_012582.1_cds_WP_000357782.1_2154	0.311355	0.615368	0.266728
lcl|NC_012582.1_cds_WP_000357921.1_373	0.318868	0.667986	0.28604
lcl|NC_012582.1_cds_WP_000358092.1_2587	0.306754	0.756811	0.281863
lcl|NC_012582.1_cds_WP_000358461.1_1247	0.285255	0.491193	0.2576
lcl|NC_012582.1_cds_WP_000358606.1_463	0.272006	0.493277	0.236628
lcl|NC_012582.1_cds_WP_000359808.1_942	0.346839	0.771045	0.290442
lcl|NC_012582.1_cds_WP_000360586.1_1778	0.294115	0.559888	0.266436
lcl|NC_012582.1_cds_WP_000360594.1_2024	0.320099	0.657593	0.28066
lcl|NC_012582.1_cds_WP_000361691.1_1490	0.275566	0.48783	0.237427
lcl|NC_012582.1_cds_WP_000361855.1_1979	0.279745	0.499713	0.253419
lcl|NC_012582.1_cds_WP_000362111.1_1725	0.279395	0.487628	0.250178
lcl|NC_012582.1_cds_WP_000362406.1_868	0.313774	0.562926	0.2789
lcl|NC_012582.1_cds_WP_000362982.1_1116	0.261179	0.459051	0.239451
lcl|NC_012582.1_cds_WP_000362982.1_1211	0.261179	0.459051	0.239451
lcl|NC_012582.1_cds_WP_000364240.1_961	0.275598	0.466188	0.255247
lcl|NC_012582.1_cds_WP_000364254.1_686	0.29029	0.509837	0.251681
lcl|NC_012582.1_cds_WP_000364592.1_852	0.302764	0.559572	0.27401
lcl|NC_012582.1_cds_WP_000365090.1_2040	0.285089	0.533106	0.251758
lcl|NC_012582.1_cds_WP_000366101.1_1762	0.325096	0.56409	0.262023
lcl|NC_012582.1_cds_WP_000367640.1_206	0.296997	0.636424	0.256614
lcl|NC_012582.1_cds_WP_000369278.1_558	0.272833	0.515354	0.250715
lcl|NC_012582.1_cds_WP_000369797.1_1013	0.293472	0.543098	0.255759
lcl|NC_012582.1_cds_WP_000369825.1_319	0.271187	0.479318	0.2289
lcl|NC_012582.1_cds_WP_000369855.1_749	0.308495	0.548385	0.270524
lcl|NC_012582.1_cds_WP_000369921.1_1332	0.306585	0.596676	0.26646
lcl|NC_012582.1_cds_WP_000370567.1_1321	0.256074	0.551978	0.239543
lcl|NC_012582.1_cds_WP_000371417.1_311	0.305708	0.606784	0.275049
lcl|NC_012582.1_cds_WP_000371949.1_1031	0.27099	0.403176	0.231939
lcl|NC_012582.1_cds_WP_000372621.1_518	0.332554	0.66901	0.298242
lcl|NC_012582.1_cds_WP_000372748.1_2565	0.319132	0.587195	0.274321
lcl|NC_012582.1_cds_WP_000373284.1_2226	0.30321	0.49981	0.267759
lcl|NC_012582.1_cds_WP_000373567.1_1094	0.283949	0.598523	0.232636
lcl|NC_012582.1_cds_WP_000373567.1_1233	0.283949	0.598523	0.232636
lcl|NC_012582.1_cds_WP_000376453.1_2351	0.279012	0.451153	0.248815
lcl|NC_012582.1_cds_WP_000376481.1_2523	0.297379	0.532339	0.267949
lcl|NC_012582.1_cds_WP_000376835.1_1470	0.288931	0.439823	0.245251
lcl|NC_012582.1_cds_WP_000378235.1_173	0.318548	0.645983	0.288239
lcl|NC_012582.1_cds_WP_000378643.1_2703	0.299851	0.547562	0.269319
lcl|NC_012582.1_cds_WP_000379749.1_862	0.284379	0.479811	0.259175
lcl|NC_012582.1_cds_WP_000379797.1_763	0.260143	0.431955	0.224225
lcl|NC_012582.1_cds_WP_000381017.1_2036	0.297192	0.540911	0.261641
lcl|NC_012582.1_cds_WP_000381501.1_2395	0.284569	0.521485	0.254415
lcl|NC_012582.1_cds_WP_000382640.1_2542	0.305076	0.600229	0.260067
lcl|NC_012582.1_cds_WP_000383338.1_472	0.296087	0.526858	0.256884
lcl|NC_012582.1_cds_WP_000383589.1_1916	0.278243	0.493871	0.248199
lcl|NC_012582.1_cds_WP_000384072.1_2484	0.299497	0.57007	0.269237
lcl|NC_012582.1_cds_WP_000384299.1_368	0.265779	0.470373	0.22643
lcl|NC_012582.1_cds_WP_000384387.1_56	0.299843	0.563455	0.25732
lcl|NC_012582.1_cds_WP_000386325.1_376	0.281764	0.441823	0.242033
lcl|NC_012582.1_cds_WP_000387269.1_2598	0.308038	0.745889	0.302326
lcl|NC_012582.1_cds_WP_000387680.1_1014	0.273117	0.502511	0.245229
lcl|NC_012582.1_cds_WP_000391276.1_2328	0.275943	0.389481	0.228077
lcl|NC_012582.1_cds_WP_000393917.1_599	0.283125	0.476864	0.225188
lcl|NC_012582.1_cds_WP_000394676.1_2734	0.280452	0.507216	0.242676
lcl|NC_012582.1_cds_WP_000394900.1_1026	0.296014	0.582794	0.253409
lcl|NC_012582.1_cds_WP_000397172.1_2509	0.316934	0.622288	0.281984
lcl|NC_012582.1_cds_WP_000400335.1_2205	0.310031	0.659479	0.268336
lcl|NC_012582.1_cds_WP_000400806.1_1615	0.307679	0.639961	0.273217
lcl|NC_012582.1_cds_WP_000400843.1_1751	0.294313	0.570583	0.256742
lcl|NC_012582.1_cds_WP_000401432.1_2315	0.312098	0.658185	0.281904
lcl|NC_012582.1_cds_WP_000402351.1_2405	0.319982	0.595827	0.301475
lcl|NC_012582.1_cds_WP_000404204.1_2455	0.297187	0.650028	0.270084
lcl|NC_012582.1_cds_WP_000404355.1_2258	0.29932	0.565528	0.272348
lcl|NC_012582.1_cds_WP_000405330.1_2178	0.283862	0.48677	0.259092
lcl|NC_012582.1_cds_WP_000410586.1_2522	0.309553	0.614695	0.266909
lcl|NC_012582.1_cds_WP_000410818.1_1338	0.302376	0.530408	0.27219
lcl|NC_012582.1_cds_WP_000410935.1_912	0.293819	0.438772	0.257143
lcl|NC_012582.1_cds_WP_000410960.1_1862	0.272735	0.478107	0.22325
lcl|NC_012582.1_cds_WP_000411507.1_1446	0.277036	0.47326	0.238353
lcl|NC_012582.1_cds_WP_000412706.1_2032	0.307918	0.590599	0.262011
lcl|NC_012582.1_cds_WP_000412889.1_1149	0.29512	0.59044	0.259316
lcl|NC_012582.1_cds_WP_000413398.1_1376	0.272778	0.530603	0.24053
lcl|NC_012582.1_cds_WP_000414667.1_1104	0.270738	0.545755	0.251153
lcl|NC_012582.1_cds_WP_000414667.1_1223	0.270738	0.545755	0.251153
lcl|NC_012582.1_cds_WP_000416442.1_2511	0.335214	0.746757	0.301431
lcl|NC_012582.1_cds_WP_000417708.1_1918	0.276516	0.481668	0.245919
lcl|NC_012582.1_cds_WP_000418747.1_2439	0.285926	0.533085	0.250689
lcl|NC_012582.1_cds_WP_000420410.1_674	0.293811	0.531528	0.251087
lcl|NC_012582.1_cds_WP_000420717.1_6	0.284497	0.467042	0.228167
lcl|NC_012582.1_cds_WP_000421327.1_647	0.276841	0.538626	0.237601
lcl|NC_012582.1_cds_WP_000422344.1_2602	0.314636	0.747092	0.303958
lcl|NC_012582.1_cds_WP_000422577.1_492	0.302008	0.508907	0.248623
lcl|NC_012582.1_cds_WP_000423489.1_1089	0.310286	0.67142	0.280911
lcl|NC_012582.1_cds_WP_000423542.1_601	0.295269	0.592007	0.261254
lcl|NC_012582.1_cds_WP_000423593.1_2397	0.277966	0.497189	0.248404
lcl|NC_012582.1_cds_WP_000423624.1_2185	0.27718	0.484957	0.236601
lcl|NC_012582.1_cds_WP_000424157.1_1810	0.272655	0.446277	0.235599
lcl|NC_012582.1_cds_WP_000424767.1_745	0.309061	0.665089	0.277951
lcl|NC_012582.1_cds_WP_000425238.1_838	0.290379	0.517514	0.241993
lcl|NC_012582.1_cds_WP_000425587.1_2494	0.306769	0.568336	0.271611
lcl|NC_012582.1_cds_WP_000425784.1_1431	0.291846	0.569426	0.272681
lcl|NC_012582.1_cds_WP_000426027.1_2628	0.320163	0.608778	0.272395
lcl|NC_012582.1_cds_WP_000426107.1_1919	0.37018	0.609398	0.341147
lcl|NC_012582.1_cds_WP_000426542.1_318	0.263068	0.434884	0.218302
lcl|NC_012582.1_cds_WP_000427216.1_731	0.296939	0.519174	0.264113
lcl|NC_012582.1_cds_WP_000427753.1_774	0.288736	0.497388	0.27095
lcl|NC_012582.1_cds_WP_000428698.1_552	0.26913	0.476886	0.233761
lcl|NC_012582.1_cds_WP_000431619.1_1625	0.307193	0.516371	0.251214
lcl|NC_012582.1_cds_WP_000432038.1_1555	0.294816	0.668165	0.282752
lcl|NC_012582.1_cds_WP_000433078.1_287	0.26989	0.439523	0.242565
lcl|NC_012582.1_cds_WP_000433304.1_2196	0.267	0.45532	0.217824
lcl|NC_012582.1_cds_WP_000433346.1_907	0.299292	0.521114	0.24715
lcl|NC_012582.1_cds_WP_000434285.1_1427	0.284402	0.502555	0.24379
lcl|NC_012582.1_cds_WP_000434306.1_2049	0.320474	0.689151	0.278792
lcl|NC_012582.1_cds_WP_000434480.1_1343	0.301741	0.550989	0.258511
lcl|NC_012582.1_cds_WP_000434699.1_1782	0.294539	0.524178	0.248528
lcl|NC_012582.1_cds_WP_000436139.1_1717	0.30293	0.509706	0.266833
lcl|NC_012582.1_cds_WP_000437436.1_1132	0.257152	0.596356	0.230368
lcl|NC_012582.1_cds_WP_000437436.1_1195	0.257152	0.596356	0.230368
lcl|NC_012582.1_cds_WP_000437951.1_489	0.288053	0.581633	0.265182
lcl|NC_012582.1_cds_WP_000438236.1_1045	0.275519	0.444682	0.236566
lcl|NC_012582.1_cds_WP_000440285.1_236	0.286503	0.594	0.260758
lcl|NC_012582.1_cds_WP_000443976.1_122	0.31153	0.555143	0.2635
lcl|NC_012582.1_cds_WP_000444259.1_468	0.284197	0.467263	0.253083
lcl|NC_012582.1_cds_WP_000444695.1_1982	0.287019	0.568548	0.251071
lcl|NC_012582.1_cds_WP_000445268.1_1786	0.299558	0.585326	0.263572
lcl|NC_012582.1_cds_WP_000445305.1_1489	0.292989	0.522143	0.246254
lcl|NC_012582.1_cds_WP_000447083.1_2453	0.307969	0.542714	0.271222
lcl|NC_012582.1_cds_WP_000447408.1_2393	0.281144	0.482611	0.255894
lcl|NC_012582.1_cds_WP_000447541.1_2085	0.332669	0.723717	0.305919
lcl|NC_012582.1_cds_WP_000447980.1_762	0.255998	0.391095	0.233942
lcl|NC_012582.1_cds_WP_000450922.1_183	0.324416	0.72113	0.306226
lcl|NC_012582.1_cds_WP_000453785.1_1075	0.314268	0.559075	0.276371
lcl|NC_012582.1_cds_WP_000453906.1_1673	0.280782	0.546483	0.238294
lcl|NC_012582.1_cds_WP_000456236.1_2675	0.345441	0.640168	0.294967
lcl|NC_012582.1_cds_WP_000456297.1_2157	0.279595	0.471175	0.241559
lcl|NC_012582.1_cds_WP_000456980.1_819	0.286382	0.41585	0.237167
lcl|NC_012582.1_cds_WP_000457165.1_1997	0.277964	0.485528	0.240496
lcl|NC_012582.1_cds_WP_000458935.1_201	0.288079	0.608732	0.26328
lcl|NC_012582.1_cds_WP_000459569.1_2696	0.299117	0.524661	0.243836
lcl|NC_012582.1_cds_WP_000459621.1_90	0.248988	0.527964	0.229246
lcl|NC_012582.1_cds_WP_000459673.1_1723	0.275081	0.506124	0.238671
lcl|NC_012582.1_cds_WP_000460372.1_382	0.283693	0.498634	0.245166
lcl|NC_012582.1_cds_WP_000460767.1_1890	0.29952	0.592956	0.256596
lcl|NC_012582.1_cds_WP_000461417.1_2072	0.280471	0.489593	0.253277
lcl|NC_012582.1_cds_WP_000462069.1_642	0.328634	0.790975	0.302044
lcl|NC_012582.1_cds_WP_000462150.1_1352	0.30734	0.650623	0.287549
lcl|NC_012582.1_cds_WP_000462611.1_2195	0.270622	0.508253	0.238291
lcl|NC_012582.1_cds_WP_000462721.1_559	0.323774	0.612265	0.280703
lcl|NC_012582.1_cds_WP_000462806.1_2411	0.315685	0.647828	0.279091
lcl|NC_012582.1_cds_WP_000462866.1_1291	0.272384	0.467403	0.259403
lcl|NC_012582.1_cds_WP_000462885.1_330	0.343887	0.750841	0.34176
lcl|NC_012582.1_cds_WP_000464739.1_1745	0.261998	0.435189	0.234162
lcl|NC_012582.1_cds_WP_000466684.1_1107	0.282411	0.531079	0.267253
lcl|NC_012582.1_cds_WP_000466684.1_1220	0.282411	0.531079	0.267253
lcl|NC_012582.1_cds_WP_000467102.1_1021	0.35718	0.68686	0.334043
lcl|NC_012582.1_cds_WP_000468221.1_770	0.350405	0.584728	0.297604
lcl|NC_012582.1_cds_WP_000469664.1_1441	0.29237	0.540551	0.252844
lcl|NC_012582.1_cds_WP_000471965.1_1949	0.277944	0.530751	0.24895
lcl|NC_012582.1_cds_WP_000472779.1_2507	0.278283	0.497118	0.2504
lcl|NC_012582.1_cds_WP_000473082.1_3	0.289799	0.522971	0.24389
lcl|NC_012582.1_cds_WP_000473768.1_445	0.328701	0.670844	0.284373
lcl|NC_012582.1_cds_WP_000475487.1_753	0.279923	0.605053	0.248119
lcl|NC_012582.1_cds_WP_000476112.1_1974	0.284175	0.613207	0.257006
lcl|NC_012582.1_cds_WP_000476327.1_1176	0.281547	0.549667	0.248685
lcl|NC_012582.1_cds_WP_000476637.1_1883	0.297714	0.516623	0.255192
lcl|NC_012582.1_cds_WP_000477170.1_2182	0.304568	0.58138	0.263598
lcl|NC_012582.1_cds_WP_000478646.1_259	0.287868	0.485896	0.249275
lcl|NC_012582.1_cds_WP_000478912.1_1373	0.297724	0.598453	0.268018
lcl|NC_012582.1_cds_WP_000479238.1_296	0.302174	0.571018	0.279902
lcl|NC_012582.1_cds_WP_000480004.1_2416	0.295711	0.542346	0.25892
lcl|NC_012582.1_cds_WP_000480153.1_1266	0.324381	0.647267	0.289994
lcl|NC_012582.1_cds_WP_000481018.1_546	0.336182	0.690502	0.293171
lcl|NC_012582.1_cds_WP_000481249.1_150	0.29315	0.545507	0.261164
lcl|NC_012582.1_cds_WP_000481534.1_1177	0.297723	0.582791	0.258209
lcl|NC_012582.1_cds_WP_000482531.1_891	0.278186	0.611221	0.249935
lcl|NC_012582.1_cds_WP_000483035.1_2327	0.285313	0.517235	0.251017
lcl|NC_012582.1_cds_WP_000483924.1_2289	0.287096	0.490483	0.251669
lcl|NC_012582.1_cds_WP_000483998.1_2697	0.308739	0.556578	0.274358
lcl|NC_012582.1_cds_WP_000484214.1_622	0.27241	0.499583	0.23864
lcl|NC_012582.1_cds_WP_000484911.1_584	0.292548	0.507698	0.252677
lcl|NC_012582.1_cds_WP_000486403.1_728	0.314928	0.647296	0.279507
lcl|NC_012582.1_cds_WP_000487053.1_229	0.270841	0.506528	0.232278
lcl|NC_012582.1_cds_WP_000488279.1_616	0.295604	0.521677	0.263079
lcl|NC_012582.1_cds_WP_000490818.1_211	0.291926	0.53093	0.258289
lcl|NC_012582.1_cds_WP_000491215.1_2191	0.308693	0.594672	0.269895
lcl|NC_012582.1_cds_WP_000492451.1_1881	0.285918	0.511686	0.267293
lcl|NC_012582.1_cds_WP_000492997.1_1511	0.290246	0.439847	0.243296
lcl|NC_012582.1_cds_WP_000492997.1_1514	0.290246	0.439847	0.243296
lcl|NC_012582.1_cds_WP_000493010.1_1929	0.288596	0.522024	0.253044
lcl|NC_012582.1_cds_WP_000493023.1_1508	0.262003	0.540455	0.24812
lcl|NC_012582.1_cds_WP_000493681.1_1112	0.304676	0.646503	0.286725
lcl|NC_012582.1_cds_WP_000493681.1_1215	0.304676	0.646503	0.286725
lcl|NC_012582.1_cds_WP_000493874.1_2295	0.317078	0.601324	0.270315
lcl|NC_012582.1_cds_WP_000494544.1_623	0.2833	0.514465	0.24203
lcl|NC_012582.1_cds_WP_000494575.1_2398	0.265814	0.334797	0.23441
lcl|NC_012582.1_cds_WP_000494952.1_286	0.293809	0.463147	0.252081
lcl|NC_012582.1_cds_WP_000494988.1_340	0.282953	0.5377	0.254758
lcl|NC_012582.1_cds_WP_000495305.1_897	0.275364	0.46934	0.235692
lcl|NC_012582.1_cds_WP_000495557.1_635	0.293495	0.624424	0.266908
lcl|NC_012582.1_cds_WP_000495583.1_51	0.28175	0.454995	0.239387
lcl|NC_012582.1_cds_WP_000495611.1_2341	0.301134	0.537938	0.262605
lcl|NC_012582.1_cds_WP_000497154.1_2054	0.265749	0.53826	0.231931
lcl|NC_012582.1_cds_WP_000498418.1_1161	0.336343	0.686347	0.292084
lcl|NC_012582.1_cds_WP_000498493.1_1736	0.284444	0.498837	0.255165
lcl|NC_012582.1_cds_WP_000501296.1_2292	0.31874	0.700043	0.289359
lcl|NC_012582.1_cds_WP_000501410.1_795	0.264213	0.403611	0.23516
lcl|NC_012582.1_cds_WP_000502256.1_1815	0.293809	0.524113	0.256565
lcl|NC_012582.1_cds_WP_000502884.1_2516	0.313466	0.60475	0.276805
lcl|NC_012582.1_cds_WP_000503164.1_2216	0.267435	0.374905	0.223394
lcl|NC_012582.1_cds_WP_000503164.1_849	0.267435	0.374905	0.223394
lcl|NC_012582.1_cds_WP_000503167.1_2575	0.263075	0.364079	0.213672
lcl|NC_012582.1_cds_WP_000503169.1_1669	0.267774	0.376073	0.223348
lcl|NC_012582.1_cds_WP_000505205.1_168	0.2767	0.495017	0.253181
lcl|NC_012582.1_cds_WP_000505884.1_2215	0.323328	0.674499	0.284675
lcl|NC_012582.1_cds_WP_000506955.1_1174	0.273526	0.469989	0.244891
lcl|NC_012582.1_cds_WP_000508969.1_91	0.287966	0.635899	0.261896
lcl|NC_012582.1_cds_WP_000509705.1_991	0.31582	0.655381	0.284286
lcl|NC_012582.1_cds_WP_000510158.1_1142	0.317259	0.552932	0.282239
lcl|NC_012582.1_cds_WP_000510158.1_1185	0.317259	0.552932	0.282239
lcl|NC_012582.1_cds_WP_000511053.1_1733	0.3241	0.64745	0.290031
lcl|NC_012582.1_cds_WP_000511161.1_1676	0.30468	0.582913	0.257838
lcl|NC_012582.1_cds_WP_000512066.1_1102	0.267858	0.431571	0.231691
lcl|NC_012582.1_cds_WP_000512066.1_1225	0.267858	0.431571	0.231691
lcl|NC_012582.1_cds_WP_000513476.1_1130	0.290864	0.561654	0.234251
lcl|NC_012582.1_cds_WP_000513476.1_1197	0.290864	0.561654	0.234251
lcl|NC_012582.1_cds_WP_000513613.1_2268	0.281029	0.498652	0.261129
lcl|NC_012582.1_cds_WP_000513713.1_2388	0.313586	0.604381	0.272727
lcl|NC_012582.1_cds_WP_000514261.1_420	0.292531	0.549506	0.253296
lcl|NC_012582.1_cds_WP_000514448.1_301	0.239206	0.374399	0.194516
lcl|NC_012582.1_cds_WP_000515790.1_2708	0.30963	0.585397	0.283824
lcl|NC_012582.1_cds_WP_000516147.1_836	0.336	0.798745	0.311096
lcl|NC_012582.1_cds_WP_000516546.1_179	0.292693	0.571464	0.253286
lcl|NC_012582.1_cds_WP_000517149.1_1060	0.298516	0.525354	0.251061
lcl|NC_012582.1_cds_WP_000517532.1_315	0.275362	0.496184	0.233952
lcl|NC_012582.1_cds_WP_000517924.1_1012	0.295045	0.556719	0.262919
lcl|NC_012582.1_cds_WP_000520428.1_1784	0.303481	0.620272	0.26532
lcl|NC_012582.1_cds_WP_000520444.1_2641	0.269566	0.495575	0.237074
lcl|NC_012582.1_cds_WP_000521788.1_144	0.275314	0.446744	0.236849
lcl|NC_012582.1_cds_WP_000522240.1_934	0.309665	0.77863	0.289073
lcl|NC_012582.1_cds_WP_000523294.1_2318	0.328793	0.695711	0.293207
lcl|NC_012582.1_cds_WP_000523648.1_78	0.277181	0.504562	0.243391
lcl|NC_012582.1_cds_WP_000524712.1_149	0.319149	0.59881	0.28079
lcl|NC_012582.1_cds_WP_000527934.1_2610	0.335478	0.734585	0.303914
lcl|NC_012582.1_cds_WP_000529116.1_684	0.310603	0.571048	0.27466
lcl|NC_012582.1_cds_WP_000529898.1_30	0.299072	0.567894	0.254588
lcl|NC_012582.1_cds_WP_000529940.1_2597	0.315649	0.731833	0.303882
lcl|NC_012582.1_cds_WP_000531809.1_540	0.268799	0.499078	0.247249
lcl|NC_012582.1_cds_WP_000533090.1_1600	0.282113	0.510141	0.256072
lcl|NC_012582.1_cds_WP_000533748.1_1479	0.276625	0.579768	0.256662
lcl|NC_012582.1_cds_WP_000536856.1_1252	0.288516	0.505837	0.245511
lcl|NC_012582.1_cds_WP_000540337.1_613	0.318063	0.621306	0.289587
lcl|NC_012582.1_cds_WP_000542395.1_2687	0.300281	0.618812	0.266765
lcl|NC_012582.1_cds_WP_000542594.1_806	0.273057	0.406699	0.234169
lcl|NC_012582.1_cds_WP_000543544.1_2297	0.318296	0.632662	0.279525
lcl|NC_012582.1_cds_WP_000543911.1_1639	0.26202	0.487369	0.237489
lcl|NC_012582.1_cds_WP_000545341.1_1445	0.262555	0.465664	0.233603
lcl|NC_012582.1_cds_WP_000545344.1_2095	0.28885	0.529335	0.247084
lcl|NC_012582.1_cds_WP_000545404.1_55	0.317577	0.610022	0.283683
lcl|NC_012582.1_cds_WP_000545503.1_1372	0.296279	0.630594	0.27338
lcl|NC_012582.1_cds_WP_000546921.1_477	0.296597	0.530618	0.254675
lcl|NC_012582.1_cds_WP_000547403.1_2548	0.298257	0.589442	0.269494
lcl|NC_012582.1_cds_WP_000547542.1_1697	0.287615	0.450503	0.238849
lcl|NC_012582.1_cds_WP_000549070.1_807	0.283802	0.492032	0.241701
lcl|NC_012582.1_cds_WP_000549338.1_1143	0.29436	0.45522	0.268099
lcl|NC_012582.1_cds_WP_000549338.1_1184	0.29436	0.45522	0.268099
lcl|NC_012582.1_cds_WP_000549755.1_1403	0.297406	0.55957	0.258341
lcl|NC_012582.1_cds_WP_000550132.1_2386	0.278703	0.476718	0.243822
lcl|NC_012582.1_cds_WP_000550456.1_77	0.281557	0.495543	0.254968
lcl|NC_012582.1_cds_WP_000551120.1_1638	0.297281	0.544896	0.251321
lcl|NC_012582.1_cds_WP_000551394.1_1103	0.307922	0.596558	0.284071
lcl|NC_012582.1_cds_WP_000551394.1_1224	0.307922	0.596558	0.284071
lcl|NC_012582.1_cds_WP_000551472.1_2126	0.310692	0.632893	0.272901
lcl|NC_012582.1_cds_WP_000553435.1_729	0.321134	0.729902	0.29313
lcl|NC_012582.1_cds_WP_000554395.1_1265	0.274764	0.498458	0.237334
lcl|NC_012582.1_cds_WP_000555133.1_1596	0.29072	0.528949	0.258793
lcl|NC_012582.1_cds_WP_000555507.1_1766	0.326507	0.674785	0.289682
lcl|NC_012582.1_cds_WP_000557000.1_1897	0.266934	0.408426	0.225699
lcl|NC_012582.1_cds_WP_000559205.1_2558	0.296845	0.624395	0.270677
lcl|NC_012582.1_cds_WP_000559818.1_2093	0.293799	0.550452	0.263783
lcl|NC_012582.1_cds_WP_000560961.1_2740	0.267589	0.487122	0.207336
lcl|NC_012582.1_cds_WP_000561723.1_350	0.28537	0.502279	0.244671
lcl|NC_012582.1_cds_WP_000561939.1_1584	0.310893	0.58867	0.275858
lcl|NC_012582.1_cds_WP_000566897.1_217	0.31482	0.560972	0.267209
lcl|NC_012582.1_cds_WP_000567318.1_2434	0.276152	0.485152	0.224364
lcl|NC_012582.1_cds_WP_000567380.1_74	0.285779	0.487425	0.247333
lcl|NC_012582.1_cds_WP_000568492.1_1892	0.313367	0.510341	0.26207
lcl|NC_012582.1_cds_WP_000568617.1_866	0.30098	0.499303	0.269553
lcl|NC_012582.1_cds_WP_000569879.1_882	0.311907	0.59455	0.272388
lcl|NC_012582.1_cds_WP_000570154.1_2430	0.306953	0.540417	0.261956
lcl|NC_012582.1_cds_WP_000570784.1_689	0.288459	0.493509	0.23914
lcl|NC_012582.1_cds_WP_000571083.1_1674	0.27151	0.463987	0.246457
lcl|NC_012582.1_cds_WP_000571235.1_1761	0.285111	0.497538	0.254744
lcl|NC_012582.1_cds_WP_000571528.1_2122	0.264047	0.452747	0.243688
lcl|NC_012582.1_cds_WP_000572558.1_25	0.287076	0.468996	0.25071
lcl|NC_012582.1_cds_WP_000572778.1_1769	0.320899	0.65048	0.286802
lcl|NC_012582.1_cds_WP_000573771.1_15	0.275471	0.474637	0.240119
lcl|NC_012582.1_cds_WP_000575422.1_1874	0.294176	0.452672	0.24408
lcl|NC_012582.1_cds_WP_000576881.1_1699	0.288738	0.390798	0.234361
lcl|NC_012582.1_cds_WP_000577782.1_1721	0.276149	0.466775	0.24962
lcl|NC_012582.1_cds_WP_000578705.1_861	0.288218	0.46514	0.247247
lcl|NC_012582.1_cds_WP_000579123.1_303	0.287487	0.515314	0.251224
lcl|NC_012582.1_cds_WP_000579493.1_1334	0.296296	0.559871	0.261596
lcl|NC_012582.1_cds_WP_000579582.1_818	0.281986	0.396893	0.228968
lcl|NC_012582.1_cds_WP_000579663.1_2603	0.321188	0.793894	0.294533
lcl|NC_012582.1_cds_WP_000580359.1_1893	0.273763	0.494213	0.239927
lcl|NC_012582.1_cds_WP_000581103.1_2274	0.315396	0.65638	0.270601
lcl|NC_012582.1_cds_WP_000581314.1_175	0.30032	0.599231	0.262887
lcl|NC_012582.1_cds_WP_000581642.1_1108	0.273367	0.445763	0.244904
lcl|NC_012582.1_cds_WP_000581642.1_1219	0.273367	0.445763	0.244904
lcl|NC_012582.1_cds_WP_000581730.1_313	0.303982	0.576711	0.268177
lcl|NC_012582.1_cds_WP_000581751.1_1955	0.292948	0.551832	0.263601
lcl|NC_012582.1_cds_WP_000582706.1_2149	0.290408	0.560264	0.262076
lcl|NC_012582.1_cds_WP_000583510.1_1951	0.287905	0.546609	0.261595
lcl|NC_012582.1_cds_WP_000584512.1_1791	0.330635	0.714804	0.294631
lcl|NC_012582.1_cds_WP_000586511.1_1152	0.312501	0.572824	0.263104
lcl|NC_012582.1_cds_WP_000586561.1_2619	0.309446	0.60165	0.27942
lcl|NC_012582.1_cds_WP_000586597.1_349	0.278476	0.508569	0.238378
lcl|NC_012582.1_cds_WP_000587734.1_2508	0.282378	0.524239	0.241621
lcl|NC_012582.1_cds_WP_000587795.1_268	0.321058	0.59782	0.279654
lcl|NC_012582.1_cds_WP_000587840.1_2418	0.300872	0.615244	0.267703
lcl|NC_012582.1_cds_WP_000587948.1_1938	0.303412	0.56247	0.256214
lcl|NC_012582.1_cds_WP_000589189.1_605	0.305778	0.646864	0.271683
lcl|NC_012582.1_cds_WP_000589997.1_2382	0.260919	0.461737	0.227718
lcl|NC_012582.1_cds_WP_000590014.1_257	0.289386	0.472894	0.231828
lcl|NC_012582.1_cds_WP_000591796.1_2690	0.360284	0.743415	0.311191
lcl|NC_012582.1_cds_WP_000591846.1_805	0.278972	0.453591	0.241421
lcl|NC_012582.1_cds_WP_000592627.1_2057	0.275542	0.500153	0.24403
lcl|NC_012582.1_cds_WP_000593310.1_497	0.312149	0.591884	0.268824
lcl|NC_012582.1_cds_WP_000593519.1_1503	0.292894	0.461453	0.253223
lcl|NC_012582.1_cds_WP_000593852.1_169	0.294076	0.526792	0.254999
lcl|NC_012582.1_cds_WP_000595678.1_2553	0.278055	0.469619	0.233356
lcl|NC_012582.1_cds_WP_000597952.1_655	0.310036	0.665968	0.279773
lcl|NC_012582.1_cds_WP_000598590.1_993	0.278175	0.56315	0.229811
lcl|NC_012582.1_cds_WP_000599443.1_1383	0.265665	0.430339	0.236897
lcl|NC_012582.1_cds_WP_000602538.1_2116	0.264652	0.502712	0.214764
lcl|NC_012582.1_cds_WP_000602850.1_700	0.28406	0.505828	0.256491
lcl|NC_012582.1_cds_WP_000603461.1_1799	0.293291	0.473853	0.244109
lcl|NC_012582.1_cds_WP_000603545.1_1032	0.249489	0.467828	0.236641
lcl|NC_012582.1_cds_WP_000604829.1_1742	0.314984	0.624453	0.285011
lcl|NC_012582.1_cds_WP_000605624.1_765	0.284869	0.484328	0.23815
lcl|NC_012582.1_cds_WP_000606619.1_2283	0.346582	0.748002	0.310776
lcl|NC_012582.1_cds_WP_000608142.1_1561	0.300483	0.571374	0.268697
lcl|NC_012582.1_cds_WP_000608980.1_2413	0.278571	0.442215	0.221341
lcl|NC_012582.1_cds_WP_000609516.1_2222	0.311552	0.548984	0.272642
lcl|NC_012582.1_cds_WP_000609761.1_669	0.28315	0.559255	0.257619
lcl|NC_012582.1_cds_WP_000609957.1_1875	0.296209	0.579029	0.264446
lcl|NC_012582.1_cds_WP_000610805.1_1426	0.289205	0.466042	0.249185
lcl|NC_012582.1_cds_WP_000611535.1_2570	0.306295	0.528199	0.275971
lcl|NC_012582.1_cds_WP_000612504.1_2083	0.27846	0.482476	0.23099
lcl|NC_012582.1_cds_WP_000612658.1_2400	0.291818	0.451368	0.249747
lcl|NC_012582.1_cds_WP_000613529.1_272	0.290367	0.459756	0.248882
lcl|NC_012582.1_cds_WP_000613859.1_2320	0.288841	0.520314	0.24573
lcl|NC_012582.1_cds_WP_000614019.1_198	0.298334	0.580559	0.280618
lcl|NC_012582.1_cds_WP_000614136.1_2375	0.324173	0.803429	0.313145
lcl|NC_012582.1_cds_WP_000614593.1_1408	0.307707	0.616482	0.278136
lcl|NC_012582.1_cds_WP_000615344.1_118	0.297401	0.539786	0.270846
lcl|NC_012582.1_cds_WP_000615540.1_2593	0.334446	0.739428	0.309578
lcl|NC_012582.1_cds_WP_000615892.1_2712	0.296284	0.550079	0.259172
lcl|NC_012582.1_cds_WP_000616209.1_1713	0.281897	0.537611	0.257694
lcl|NC_012582.1_cds_WP_000617198.1_2342	0.279517	0.589959	0.252572
lcl|NC_012582.1_cds_WP_000617542.1_2601	0.302724	0.744772	0.288499
lcl|NC_012582.1_cds_WP_000617864.1_33	0.290492	0.434071	0.234346
lcl|NC_012582.1_cds_WP_000619209.1_531	0.303384	0.557983	0.259619
lcl|NC_012582.1_cds_WP_000619460.1_1301	0.253804	0.42361	0.227303
lcl|NC_012582.1_cds_WP_000620221.1_64	0.288776	0.551294	0.265228
lcl|NC_012582.1_cds_WP_000620446.1_787	0.317558	0.65378	0.286724
lcl|NC_012582.1_cds_WP_000621097.1_2410	0.316957	0.644831	0.274512
lcl|NC_012582.1_cds_WP_000621833.1_2419	0.289599	0.556734	0.25449
lcl|NC_012582.1_cds_WP_000621847.1_1304	0.286561	0.528529	0.26408
lcl|NC_012582.1_cds_WP_000621906.1_1348	0.307437	0.611941	0.277574
lcl|NC_012582.1_cds_WP_000621946.1_1448	0.300324	0.50949	0.260761
lcl|NC_012582.1_cds_WP_000622582.1_1487	0.310744	0.626619	0.283655
lcl|NC_012582.1_cds_WP_000623073.1_98	0.292687	0.514626	0.259706
lcl|NC_012582.1_cds_WP_000623159.1_935	0.328945	0.700582	0.301755
lcl|NC_012582.1_cds_WP_000623699.1_2199	0.283438	0.472926	0.254817
lcl|NC_012582.1_cds_WP_000624259.1_2105	0.309285	0.477742	0.276018
lcl|NC_012582.1_cds_WP_000625923.1_40	0.340215	0.52799	0.338995
lcl|NC_012582.1_cds_WP_000625979.1_1577	0.337936	0.682241	0.300649
lcl|NC_012582.1_cds_WP_000626426.1_1359	0.323787	0.690467	0.29829
lcl|NC_012582.1_cds_WP_000627006.1_527	0.281407	0.510787	0.217613
lcl|NC_012582.1_cds_WP_000627275.1_1869	0.306647	0.536185	0.280913
lcl|NC_012582.1_cds_WP_000627575.1_2618	0.281485	0.522894	0.240088
lcl|NC_012582.1_cds_WP_000627681.1_2616	0.316102	0.564856	0.284597
lcl|NC_012582.1_cds_WP_000628943.1_2408	0.330728	0.68994	0.293399
lcl|NC_012582.1_cds_WP_000631302.1_1896	0.33961	0.705279	0.290344
lcl|NC_012582.1_cds_WP_000631987.1_1546	0.28207	0.425312	0.252158
lcl|NC_012582.1_cds_WP_000633281.1_2750	0.292142	0.498253	0.265647
lcl|NC_012582.1_cds_WP_000633519.1_1583	0.282427	0.484732	0.251848
lcl|NC_012582.1_cds_WP_000633844.1_1562	0.297711	0.521816	0.262196
lcl|NC_012582.1_cds_WP_000634664.1_1836	0.275898	0.428745	0.205224
lcl|NC_012582.1_cds_WP_000635065.1_2469	0.265041	0.468374	0.247849
lcl|NC_012582.1_cds_WP_000635450.1_258	0.297967	0.551181	0.262488
lcl|NC_012582.1_cds_WP_000637668.1_2102	0.29472	0.496271	0.259904
lcl|NC_012582.1_cds_WP_000638373.1_2700	0.303107	0.658258	0.273567
lcl|NC_012582.1_cds_WP_000638581.1_1868	0.293377	0.571454	0.262534
lcl|NC_012582.1_cds_WP_000638752.1_1123	0.300128	0.508689	0.252147
lcl|NC_012582.1_cds_WP_000638752.1_1204	0.300128	0.508689	0.252147
lcl|NC_012582.1_cds_WP_000638761.1_1124	0.283033	0.517359	0.255402
lcl|NC_012582.1_cds_WP_000638761.1_1203	0.283033	0.517359	0.255402
lcl|NC_012582.1_cds_WP_000640239.1_194	0.294921	0.592673	0.269516
lcl|NC_012582.1_cds_WP_000640566.1_237	0.323865	0.639845	0.293868
lcl|NC_012582.1_cds_WP_000643440.1_855	0.300356	0.731167	0.259999
lcl|NC_012582.1_cds_WP_000643446.1_2682	0.326315	0.794301	0.31035
lcl|NC_012582.1_cds_WP_000644763.1_13	0.269685	0.499277	0.260896
lcl|NC_012582.1_cds_WP_000645087.1_1578	0.291468	0.523709	0.255337
lcl|NC_012582.1_cds_WP_000645803.1_197	0.311455	0.52621	0.276081
lcl|NC_012582.1_cds_WP_000645840.1_36	0.322663	0.602174	0.280482
lcl|NC_012582.1_cds_WP_000646270.1_612	0.301012	0.585266	0.283943
lcl|NC_012582.1_cds_WP_000646629.1_356	0.297416	0.668259	0.283926
lcl|NC_012582.1_cds_WP_000647192.1_2595	0.335327	0.696426	0.31709
lcl|NC_012582.1_cds_WP_000647492.1_1877	0.26904	0.500587	0.226559
lcl|NC_012582.1_cds_WP_000647512.1_1040	0.296181	0.594137	0.252418
lcl|NC_012582.1_cds_WP_000647616.1_1437	0.296597	0.529203	0.280227
lcl|NC_012582.1_cds_WP_000647701.1_2209	0.321227	0.66533	0.280075
lcl|NC_012582.1_cds_WP_000648511.1_2438	0.276174	0.531196	0.255771
lcl|NC_012582.1_cds_WP_000649326.1_2436	0.31554	0.554696	0.267379
lcl|NC_012582.1_cds_WP_000649654.1_139	0.305133	0.61901	0.261148
lcl|NC_012582.1_cds_WP_000650136.1_1554	0.30518	0.58145	0.262058
lcl|NC_012582.1_cds_WP_000653994.1_363	0.337553	0.7586	0.307306
lcl|NC_012582.1_cds_WP_000654285.1_758	0.27241	0.43778	0.240712
lcl|NC_012582.1_cds_WP_000654772.1_128	0.251738	0.458684	0.228283
lcl|NC_012582.1_cds_WP_000655352.1_1712	0.276303	0.521889	0.256701
lcl|NC_012582.1_cds_WP_000658158.1_353	0.30255	0.492946	0.255857
lcl|NC_012582.1_cds_WP_000660269.1_2305	0.271217	0.499027	0.221161
lcl|NC_012582.1_cds_WP_000660927.1_603	0.276796	0.517472	0.247759
lcl|NC_012582.1_cds_WP_000661577.1_270	0.305028	0.526136	0.250746
lcl|NC_012582.1_cds_WP_000662244.1_1884	0.27847	0.537972	0.253737
lcl|NC_012582.1_cds_WP_000665274.1_2435	0.293991	0.575663	0.259158
lcl|NC_012582.1_cds_WP_000667185.1_1696	0.341672	0.805196	0.318541
lcl|NC_012582.1_cds_WP_000667946.1_2197	0.300673	0.526092	0.263389
lcl|NC_012582.1_cds_WP_000668916.1_870	0.29648	0.639775	0.257193
lcl|NC_012582.1_cds_WP_000671333.1_1700	0.280851	0.504164	0.255791
lcl|NC_012582.1_cds_WP_000671609.1_1092	0.308663	0.541744	0.264374
lcl|NC_012582.1_cds_WP_000671910.1_2546	0.287795	0.618736	0.264005
lcl|NC_012582.1_cds_WP_000672449.1_1284	0.329766	0.739848	0.296127
lcl|NC_012582.1_cds_WP_000672503.1_820	0.286093	0.462446	0.245988
lcl|NC_012582.1_cds_WP_000672709.1_880	0.320542	0.739954	0.286858
lcl|NC_012582.1_cds_WP_000672778.1_2190	0.298415	0.590482	0.262759
lcl|NC_012582.1_cds_WP_000673176.1_165	0.308226	0.602652	0.270552
lcl|NC_012582.1_cds_WP_000673275.1_2110	0.299332	0.541651	0.25686
lcl|NC_012582.1_cds_WP_000673327.1_1752	0.314194	0.726029	0.28229
lcl|NC_012582.1_cds_WP_000673586.1_467	0.325822	0.691177	0.278655
lcl|NC_012582.1_cds_WP_000675497.1_398	0.311488	0.569527	0.271841
lcl|NC_012582.1_cds_WP_000680632.1_2475	0.322995	0.705035	0.283963
lcl|NC_012582.1_cds_WP_000681558.1_284	0.29106	0.410488	0.243137
lcl|NC_012582.1_cds_WP_000682097.1_263	0.286554	0.50569	0.257702
lcl|NC_012582.1_cds_WP_000683351.1_582	0.317948	0.60579	0.273641
lcl|NC_012582.1_cds_WP_000683500.1_167	0.30619	0.658631	0.268381
lcl|NC_012582.1_cds_WP_000684019.1_779	0.293025	0.52462	0.239891
lcl|NC_012582.1_cds_WP_000687662.1_2612	0.341659	0.75786	0.287287
lcl|NC_012582.1_cds_WP_000687839.1_1277	0.296471	0.493409	0.253822
lcl|NC_012582.1_cds_WP_000689647.1_437	0.272005	0.379561	0.22995
lcl|NC_012582.1_cds_WP_000689868.1_2392	0.30326	0.679787	0.272223
lcl|NC_012582.1_cds_WP_000689982.1_2306	0.323002	0.595242	0.282633
lcl|NC_012582.1_cds_WP_000690112.1_2433	0.319486	0.598263	0.276288
lcl|NC_012582.1_cds_WP_000690639.1_21	0.273188	0.444553	0.24019
lcl|NC_012582.1_cds_WP_000690957.1_2148	0.261037	0.635015	0.242879
lcl|NC_012582.1_cds_WP_000691266.1_440	0.248035	0.428213	0.220319
lcl|NC_012582.1_cds_WP_000691366.1_133	0.302368	0.56223	0.265611
lcl|NC_012582.1_cds_WP_000691492.1_1958	0.268842	0.459225	0.250828
lcl|NC_012582.1_cds_WP_000691946.1_816	0.28208	0.446232	0.245846
lcl|NC_012582.1_cds_WP_000697869.1_2106	0.310762	0.551954	0.266546
lcl|NC_012582.1_cds_WP_000698165.1_678	0.297503	0.590698	0.261501
lcl|NC_012582.1_cds_WP_000699597.1_1455	0.282772	0.449239	0.251758
lcl|NC_012582.1_cds_WP_000699609.1_1694	0.287127	0.497962	0.246701
lcl|NC_012582.1_cds_WP_000700176.1_697	0.282599	0.592399	0.239201
lcl|NC_012582.1_cds_WP_000701620.1_922	0.283644	0.566576	0.250751
lcl|NC_012582.1_cds_WP_000702334.1_1764	0.299486	0.540421	0.265508
lcl|NC_012582.1_cds_WP_000706152.1_1872	0.25665	0.520291	0.218916
lcl|NC_012582.1_cds_WP_000708225.1_858	0.298545	0.496904	0.260986
lcl|NC_012582.1_cds_WP_000708710.1_1780	0.266743	0.43813	0.24064
lcl|NC_012582.1_cds_WP_000710446.1_1422	0.298804	0.50467	0.256247
lcl|NC_012582.1_cds_WP_000711977.1_1571	0.288659	0.523185	0.27946
lcl|NC_012582.1_cds_WP_000715538.1_1087	0.265567	0.44832	0.218387
lcl|NC_012582.1_cds_WP_000717059.1_1378	0.327806	0.663005	0.296551
lcl|NC_012582.1_cds_WP_000718700.1_2731	0.302053	0.570198	0.267003
lcl|NC_012582.1_cds_WP_000718943.1_1313	0.313131	0.561988	0.292653
lcl|NC_012582.1_cds_WP_000718969.1_1299	0.275956	0.4785	0.244353
lcl|NC_012582.1_cds_WP_000719050.1_189	0.316646	0.661709	0.285237
lcl|NC_012582.1_cds_WP_000722179.1_1341	0.295623	0.538185	0.277215
lcl|NC_012582.1_cds_WP_000724415.1_588	0.310714	0.572609	0.267624
lcl|NC_012582.1_cds_WP_000725015.1_485	0.314233	0.613737	0.284245
lcl|NC_012582.1_cds_WP_000725937.1_2421	0.293776	0.547685	0.251552
lcl|NC_012582.1_cds_WP_000729135.1_2666	0.34484	0.804329	0.320066
lcl|NC_012582.1_cds_WP_000729178.1_2592	0.313759	0.788118	0.287608
lcl|NC_012582.1_cds_WP_000729679.1_2224	0.298438	0.568608	0.25301
lcl|NC_012582.1_cds_WP_000729881.1_182	0.291061	0.580176	0.271619
lcl|NC_012582.1_cds_WP_000731531.1_2243	0.314213	0.688919	0.289587
lcl|NC_012582.1_cds_WP_000731839.1_69	0.30582	0.586476	0.274928
lcl|NC_012582.1_cds_WP_000731896.1_1478	0.325524	0.671212	0.292114
lcl|NC_012582.1_cds_WP_000732282.1_142	0.315095	0.67072	0.285885
lcl|NC_012582.1_cds_WP_000732544.1_1004	0.290571	0.598718	0.253015
lcl|NC_012582.1_cds_WP_000732723.1_746	0.300888	0.584648	0.253575
lcl|NC_012582.1_cds_WP_000733229.1_2456	0.314189	0.585627	0.282233
lcl|NC_012582.1_cds_WP_000733293.1_1472	0.276523	0.472469	0.226946
lcl|NC_012582.1_cds_WP_000734011.1_260	0.284663	0.525514	0.250455
lcl|NC_012582.1_cds_WP_000734777.1_2477	0.298063	0.536099	0.259608
lcl|NC_012582.1_cds_WP_000735334.1_2449	0.30948	0.637034	0.281569
lcl|NC_012582.1_cds_WP_000735487.1_1998	0.287703	0.510475	0.25187
lcl|NC_012582.1_cds_WP_000735498.1_602	0.313584	0.669853	0.287949
lcl|NC_012582.1_cds_WP_000735619.1_252	0.280697	0.540873	0.253628
lcl|NC_012582.1_cds_WP_000736956.1_1825	0.29011	0.530614	0.24483
lcl|NC_012582.1_cds_WP_000737547.1_2322	0.285191	0.582366	0.269265
lcl|NC_012582.1_cds_WP_000738534.1_1719	0.277385	0.546542	0.258897
lcl|NC_012582.1_cds_WP_000738708.1_438	0.280011	0.52353	0.235293
lcl|NC_012582.1_cds_WP_000738789.1_2730	0.333152	0.688247	0.274502
lcl|NC_012582.1_cds_WP_000739493.1_2238	0.303896	0.55458	0.272144
lcl|NC_012582.1_cds_WP_000741915.1_487	0.285026	0.546031	0.255592
lcl|NC_012582.1_cds_WP_000742752.1_810	0.294307	0.507897	0.245326
lcl|NC_012582.1_cds_WP_000742830.1_834	0.287308	0.520682	0.256458
lcl|NC_012582.1_cds_WP_000743246.1_429	0.268029	0.481821	0.238294
lcl|NC_012582.1_cds_WP_000743997.1_1510	0.266861	0.495244	0.237674
lcl|NC_012582.1_cds_WP_000743997.1_1513	0.266861	0.495244	0.237674
lcl|NC_012582.1_cds_WP_000744680.1_2633	0.301187	0.556616	0.262636
lcl|NC_012582.1_cds_WP_000747834.1_2265	0.279974	0.457443	0.25089
lcl|NC_012582.1_cds_WP_000747933.1_687	0.309422	0.542819	0.273806
lcl|NC_012582.1_cds_WP_000748292.1_918	0.29767	0.638716	0.27608
lcl|NC_012582.1_cds_WP_000750164.1_1940	0.329384	0.593711	0.283652
lcl|NC_012582.1_cds_WP_000750771.1_343	0.31181	0.602959	0.279119
lcl|NC_012582.1_cds_WP_000750977.1_811	0.289389	0.463205	0.241241
lcl|NC_012582.1_cds_WP_000751250.1_2429	0.314578	0.582454	0.277266
lcl|NC_012582.1_cds_WP_000751457.1_513	0.330286	0.7816	0.313665
lcl|NC_012582.1_cds_WP_000751961.1_1440	0.330918	0.694263	0.292835
lcl|NC_012582.1_cds_WP_000751972.1_1901	0.340605	0.695362	0.287781
lcl|NC_012582.1_cds_WP_000752739.1_2170	0.30762	0.575712	0.276893
lcl|NC_012582.1_cds_WP_000753231.1_456	0.286325	0.589977	0.270899
lcl|NC_012582.1_cds_WP_000754484.1_1325	0.278805	0.509277	0.25371
lcl|NC_012582.1_cds_WP_000756756.1_890	0.301567	0.553154	0.262605
lcl|NC_012582.1_cds_WP_000756880.1_1030	0.313337	0.649009	0.282559
lcl|NC_012582.1_cds_WP_000757236.1_1688	0.28598	0.469445	0.245894
lcl|NC_012582.1_cds_WP_000758871.1_572	0.30303	0.559162	0.261074
lcl|NC_012582.1_cds_WP_000758937.1_2091	0.287981	0.576809	0.2557
lcl|NC_012582.1_cds_WP_000759070.1_2237	0.290379	0.529989	0.246534
lcl|NC_012582.1_cds_WP_000759347.1_203	0.303432	0.630733	0.259064
lcl|NC_012582.1_cds_WP_000761521.1_2692	0.313835	0.5896	0.291659
lcl|NC_012582.1_cds_WP_000762020.1_1404	0.288059	0.499921	0.23789
lcl|NC_012582.1_cds_WP_000762331.1_1106	0.30041	0.561367	0.281138
lcl|NC_012582.1_cds_WP_000762331.1_1221	0.30041	0.561367	0.281138
lcl|NC_012582.1_cds_WP_000763930.1_2131	0.314974	0.657063	0.277993
lcl|NC_012582.1_cds_WP_000765092.1_951	0.276489	0.462156	0.251225
lcl|NC_012582.1_cds_WP_000767166.1_600	0.311561	0.618752	0.262299
lcl|NC_012582.1_cds_WP_000768199.1_725	0.353263	0.713633	0.304052
lcl|NC_012582.1_cds_WP_000769922.1_478	0.289305	0.567732	0.257142
lcl|NC_012582.1_cds_WP_000771533.1_1471	0.279161	0.442342	0.224214
lcl|NC_012582.1_cds_WP_000772966.1_2127	0.303704	0.507476	0.266615
lcl|NC_012582.1_cds_WP_000773094.1_694	0.28972	0.513257	0.254871
lcl|NC_012582.1_cds_WP_000773947.1_1900	0.295574	0.540797	0.265938
lcl|NC_012582.1_cds_WP_000773964.1_205	0.296144	0.495054	0.251079
lcl|NC_012582.1_cds_WP_000774534.1_2357	0.332746	0.77187	0.307214
lcl|NC_012582.1_cds_WP_000774796.1_2562	0.296405	0.518626	0.253514
lcl|NC_012582.1_cds_WP_000774910.1_404	0.304866	0.548772	0.260174
lcl|NC_012582.1_cds_WP_000774936.1_2472	0.309412	0.643033	0.275402
lcl|NC_012582.1_cds_WP_000775253.1_732	0.332453	0.729649	0.295086
lcl|NC_012582.1_cds_WP_000776223.1_1953	0.286619	0.516213	0.250239
lcl|NC_012582.1_cds_WP_000777169.1_1797	0.289527	0.509654	0.250873
lcl|NC_012582.1_cds_WP_000777870.1_2118	0.298734	0.460532	0.252969
lcl|NC_012582.1_cds_WP_000778133.1_1718	0.302615	0.625484	0.270921
lcl|NC_012582.1_cds_WP_000778181.1_1617	0.314469	0.603114	0.278223
lcl|NC_012582.1_cds_WP_000780524.1_475	0.297908	0.55007	0.264341
lcl|NC_012582.1_cds_WP_000780995.1_2376	0.307694	0.578622	0.272905
lcl|NC_012582.1_cds_WP_000781440.1_920	0.293917	0.517906	0.269527
lcl|NC_012582.1_cds_WP_000784639.1_2026	0.287071	0.505097	0.241155
lcl|NC_012582.1_cds_WP_000786153.1_2202	0.298054	0.59401	0.274317
lcl|NC_012582.1_cds_WP_000786732.1_53	0.289947	0.524987	0.263201
lcl|NC_012582.1_cds_WP_000791554.1_1477	0.301045	0.587855	0.275934
lcl|NC_012582.1_cds_WP_000792032.1_2638	0.266448	0.434868	0.23384
lcl|NC_012582.1_cds_WP_000792385.1_2556	0.28337	0.614716	0.264307
lcl|NC_012582.1_cds_WP_000794125.1_2277	0.308917	0.712639	0.290018
lcl|NC_012582.1_cds_WP_000794727.1_1608	0.297754	0.561714	0.269373
lcl|NC_012582.1_cds_WP_000796267.1_2684	0.304512	0.525886	0.278746
lcl|NC_012582.1_cds_WP_000796512.1_2656	0.339	0.754551	0.32217
lcl|NC_012582.1_cds_WP_000796799.1_2163	0.291688	0.579362	0.264423
lcl|NC_012582.1_cds_WP_000798634.1_1462	0.281555	0.508807	0.253412
lcl|NC_012582.1_cds_WP_000799584.1_2184	0.26448	0.532153	0.243565
lcl|NC_012582.1_cds_WP_000799873.1_1666	0.319342	0.496216	0.282909
lcl|NC_012582.1_cds_WP_000800334.1_1096	0.323012	0.616011	0.301892
lcl|NC_012582.1_cds_WP_000800334.1_1231	0.323012	0.616011	0.301892
lcl|NC_012582.1_cds_WP_000801149.1_92	0.299447	0.519656	0.258179
lcl|NC_012582.1_cds_WP_000801224.1_663	0.276456	0.502747	0.245269
lcl|NC_012582.1_cds_WP_000801254.1_2262	0.268209	0.466136	0.215403
lcl|NC_012582.1_cds_WP_000802336.1_800	0.285142	0.484094	0.237863
lcl|NC_012582.1_cds_WP_000802448.1_446	0.293906	0.497831	0.251763
lcl|NC_012582.1_cds_WP_000803693.1_85	0.306175	0.602483	0.282045
lcl|NC_012582.1_cds_WP_000803703.1_390	0.282901	0.560404	0.258549
lcl|NC_012582.1_cds_WP_000803850.1_2384	0.288949	0.536256	0.257893
lcl|NC_012582.1_cds_WP_000804569.1_1802	0.271454	0.495508	0.232657
lcl|NC_012582.1_cds_WP_000804830.1_2536	0.295358	0.524849	0.259643
lcl|NC_012582.1_cds_WP_000805055.1_483	0.279068	0.485261	0.241123
lcl|NC_012582.1_cds_WP_000805343.1_1417	0.280539	0.467373	0.252173
lcl|NC_012582.1_cds_WP_000805768.1_2450	0.301313	0.651044	0.272177
lcl|NC_012582.1_cds_WP_000805820.1_905	0.280987	0.553833	0.244034
lcl|NC_012582.1_cds_WP_000805968.1_1805	0.278788	0.466627	0.25574
lcl|NC_012582.1_cds_WP_000806400.1_108	0.283703	0.468122	0.247338
lcl|NC_012582.1_cds_WP_000806519.1_2654	0.276944	0.497695	0.237905
lcl|NC_012582.1_cds_WP_000807128.1_1943	0.290051	0.47581	0.245699
lcl|NC_012582.1_cds_WP_000807263.1_225	0.288876	0.524006	0.266521
lcl|NC_012582.1_cds_WP_000809006.1_2204	0.328813	0.675915	0.281071
lcl|NC_012582.1_cds_WP_000809405.1_2645	0.315932	0.595749	0.273982
lcl|NC_012582.1_cds_WP_000810607.1_2613	0.2674	0.499152	0.244854
lcl|NC_012582.1_cds_WP_000811594.1_1756	0.280843	0.560163	0.252641
lcl|NC_012582.1_cds_WP_000813302.1_298	0.298181	0.542402	0.257305
lcl|NC_012582.1_cds_WP_000813566.1_2281	0.272842	0.486903	0.243895
lcl|NC_012582.1_cds_WP_000815022.1_657	0.300796	0.64712	0.274057
lcl|NC_012582.1_cds_WP_000815876.1_830	0.270685	0.489538	0.223739
lcl|NC_012582.1_cds_WP_000816213.1_668	0.300471	0.530742	0.243562
lcl|NC_012582.1_cds_WP_000816440.1_2363	0.321924	0.633537	0.273267
lcl|NC_012582.1_cds_WP_000817146.1_2723	0.280787	0.484241	0.245367
lcl|NC_012582.1_cds_WP_000817538.1_2689	0.33927	0.584354	0.29785
lcl|NC_012582.1_cds_WP_000818005.1_2051	0.292711	0.546082	0.259834
lcl|NC_012582.1_cds_WP_000818616.1_2636	0.331688	0.63533	0.292834
lcl|NC_012582.1_cds_WP_000818840.1_17	0.284987	0.451948	0.244907
lcl|NC_012582.1_cds_WP_000818869.1_1273	0.341472	0.691994	0.294233
lcl|NC_012582.1_cds_WP_000819709.1_2561	0.297959	0.547634	0.259964
lcl|NC_012582.1_cds_WP_000821181.1_2407	0.301021	0.619052	0.252697
lcl|NC_012582.1_cds_WP_000821682.1_1080	0.322191	0.575807	0.283739
lcl|NC_012582.1_cds_WP_000822415.1_1985	0.289521	0.528783	0.265588
lcl|NC_012582.1_cds_WP_000825368.1_2005	0.322685	0.617294	0.27891
lcl|NC_012582.1_cds_WP_000826868.1_1165	0.28035	0.524088	0.25282
lcl|NC_012582.1_cds_WP_000828643.1_1113	0.279684	0.458665	0.25253
lcl|NC_012582.1_cds_WP_000828643.1_1214	0.279684	0.458665	0.25253
lcl|NC_012582.1_cds_WP_000829068.1_1599	0.27235	0.496422	0.238965
lcl|NC_012582.1_cds_WP_000829823.1_569	0.343753	0.776947	0.331383
lcl|NC_012582.1_cds_WP_000830233.1_2070	0.268898	0.443028	0.229398
lcl|NC_012582.1_cds_WP_000831828.1_2159	0.280135	0.510488	0.25326
lcl|NC_012582.1_cds_WP_000832701.1_2146	0.331116	0.740678	0.292208
lcl|NC_012582.1_cds_WP_000832721.1_1672	0.336489	0.599259	0.305419
lcl|NC_012582.1_cds_WP_000832744.1_1753	0.28789	0.511508	0.254588
lcl|NC_012582.1_cds_WP_000833004.1_959	0.302169	0.508304	0.253307
lcl|NC_012582.1_cds_WP_000833027.1_1995	0.286524	0.575921	0.250743
lcl|NC_012582.1_cds_WP_000835144.1_430	0.282054	0.474069	0.239509
lcl|NC_012582.1_cds_WP_000835877.1_2631	0.294028	0.54991	0.250725
lcl|NC_012582.1_cds_WP_000835928.1_1172	0.316559	0.589199	0.271993
lcl|NC_012582.1_cds_WP_000836326.1_575	0.269118	0.520045	0.244944
lcl|NC_012582.1_cds_WP_000836541.1_2255	0.297758	0.552262	0.260673
lcl|NC_012582.1_cds_WP_000837699.1_2728	0.27659	0.521289	0.252791
lcl|NC_012582.1_cds_WP_000837785.1_1484	0.282883	0.527343	0.257859
lcl|NC_012582.1_cds_WP_000838241.1_388	0.302625	0.714937	0.277158
lcl|NC_012582.1_cds_WP_000838328.1_2034	0.298095	0.565775	0.25762
lcl|NC_012582.1_cds_WP_000838364.1_29	0.30734	0.533146	0.25867
lcl|NC_012582.1_cds_WP_000838520.1_1748	0.302045	0.651975	0.267195
lcl|NC_012582.1_cds_WP_000839105.1_1622	0.284425	0.50969	0.237383
lcl|NC_012582.1_cds_WP_000840420.1_1914	0.341428	0.776556	0.317933
lcl|NC_012582.1_cds_WP_000840452.1_2541	0.304858	0.582566	0.278748
lcl|NC_012582.1_cds_WP_000840721.1_683	0.293153	0.518205	0.263345
lcl|NC_012582.1_cds_WP_000840982.1_2156	0.283503	0.509536	0.245521
lcl|NC_012582.1_cds_WP_000841479.1_788	0.291699	0.51962	0.253469
lcl|NC_012582.1_cds_WP_000841540.1_1607	0.292142	0.533949	0.258008
lcl|NC_012582.1_cds_WP_000842701.1_1324	0.290504	0.509235	0.249813
lcl|NC_012582.1_cds_WP_000843487.1_899	0.27406	0.470653	0.229805
lcl|NC_012582.1_cds_WP_000845886.1_2321	0.274255	0.529907	0.244079
lcl|NC_012582.1_cds_WP_000847599.1_568	0.308619	0.746272	0.303017
lcl|NC_012582.1_cds_WP_000848401.1_2135	0.292838	0.586765	0.264592
lcl|NC_012582.1_cds_WP_000849284.1_1828	0.279522	0.511644	0.246539
lcl|NC_012582.1_cds_WP_000850496.1_2715	0.283948	0.574075	0.238478
lcl|NC_012582.1_cds_WP_000852434.1_12	0.28509	0.475083	0.249403
lcl|NC_012582.1_cds_WP_000852863.1_690	0.323825	0.704544	0.291242
lcl|NC_012582.1_cds_WP_000853568.1_2504	0.275186	0.477881	0.237576
lcl|NC_012582.1_cds_WP_000853809.1_543	0.277462	0.507295	0.25396
lcl|NC_012582.1_cds_WP_000855622.1_210	0.32067	0.701939	0.283043
lcl|NC_012582.1_cds_WP_000856165.1_656	0.286019	0.492505	0.259957
lcl|NC_012582.1_cds_WP_000857631.1_1657	0.289214	0.447892	0.246005
lcl|NC_012582.1_cds_WP_000858600.1_1857	0.280636	0.449588	0.239166
lcl|NC_012582.1_cds_WP_000859357.1_2668	0.290361	0.539274	0.260397
lcl|NC_012582.1_cds_WP_000859398.1_766	0.301482	0.57866	0.255553
lcl|NC_012582.1_cds_WP_000859478.1_2338	0.263194	0.517709	0.249826
lcl|NC_012582.1_cds_WP_000859515.1_1388	0.312187	0.556415	0.260718
lcl|NC_012582.1_cds_WP_000859623.1_1661	0.291377	0.602601	0.26308
lcl|NC_012582.1_cds_WP_000861563.1_462	0.303865	0.694524	0.268355
lcl|NC_012582.1_cds_WP_000863378.1_1137	0.289749	0.554358	0.255535
lcl|NC_012582.1_cds_WP_000863378.1_1190	0.289749	0.554358	0.255535
lcl|NC_012582.1_cds_WP_000863548.1_2086	0.315453	0.78141	0.292453
lcl|NC_012582.1_cds_WP_000863737.1_981	0.300433	0.546599	0.269507
lcl|NC_012582.1_cds_WP_000864130.1_2293	0.318763	0.689119	0.275543
lcl|NC_012582.1_cds_WP_000864268.1_1345	0.285341	0.490682	0.261938
lcl|NC_012582.1_cds_WP_000864652.1_2560	0.278009	0.462729	0.247479
lcl|NC_012582.1_cds_WP_000864799.1_1907	0.317282	0.558043	0.279651
lcl|NC_012582.1_cds_WP_000865168.1_10	0.284942	0.453956	0.253394
lcl|NC_012582.1_cds_WP_000865460.1_1660	0.272037	0.495503	0.244732
lcl|NC_012582.1_cds_WP_000865953.1_285	0.2795	0.447627	0.245729
lcl|NC_012582.1_cds_WP_000866470.1_1251	0.279432	0.46282	0.243323
lcl|NC_012582.1_cds_WP_000866542.1_856	0.289111	0.607005	0.265702
lcl|NC_012582.1_cds_WP_000868186.1_2582	0.288797	0.670163	0.271971
lcl|NC_012582.1_cds_WP_000868533.1_191	0.283171	0.537806	0.262328
lcl|NC_012582.1_cds_WP_000868844.1_2446	0.263763	0.526281	0.226898
lcl|NC_012582.1_cds_WP_000869721.1_88	0.276792	0.484118	0.240624
lcl|NC_012582.1_cds_WP_000870111.1_851	0.318499	0.613067	0.249702
lcl|NC_012582.1_cds_WP_000870878.1_1458	0.280293	0.474722	0.254379
lcl|NC_012582.1_cds_WP_000872176.1_738	0.320512	0.603962	0.264195
lcl|NC_012582.1_cds_WP_000872504.1_646	0.287254	0.53839	0.255394
lcl|NC_012582.1_cds_WP_000873691.1_606	0.317147	0.710571	0.28372
lcl|NC_012582.1_cds_WP_000874728.1_2705	0.294406	0.583322	0.26873
lcl|NC_012582.1_cds_WP_000877146.1_1540	0.260393	0.43136	0.225852
lcl|NC_012582.1_cds_WP_000877199.1_698	0.308125	0.557268	0.265388
lcl|NC_012582.1_cds_WP_000877206.1_717	0.292587	0.495529	0.264447
lcl|NC_012582.1_cds_WP_000877243.1_2117	0.288461	0.53898	0.255598
lcl|NC_012582.1_cds_WP_000878557.1_2733	0.293154	0.579003	0.259485
lcl|NC_012582.1_cds_WP_000879555.1_833	0.300003	0.560002	0.266969
lcl|NC_012582.1_cds_WP_000879671.1_1844	0.301567	0.49704	0.264138
lcl|NC_012582.1_cds_WP_000880146.1_1153	0.291282	0.569081	0.236918
lcl|NC_012582.1_cds_WP_000880257.1_2167	0.289952	0.500579	0.248167
lcl|NC_012582.1_cds_WP_000880287.1_2544	0.269326	0.520859	0.246266
lcl|NC_012582.1_cds_WP_000880698.1_614	0.32112	0.773126	0.302973
lcl|NC_012582.1_cds_WP_000881906.1_143	0.285711	0.540028	0.236854
lcl|NC_012582.1_cds_WP_000882222.1_1787	0.292097	0.479261	0.257636
lcl|NC_012582.1_cds_WP_000882651.1_1999	0.288609	0.502654	0.26136
lcl|NC_012582.1_cds_WP_000883067.1_1992	0.289738	0.505331	0.257348
lcl|NC_012582.1_cds_WP_000883972.1_1390	0.313154	0.558643	0.287522
lcl|NC_012582.1_cds_WP_000884663.1_2496	0.305981	0.567872	0.264503
lcl|NC_012582.1_cds_WP_000884809.1_2555	0.318621	0.535255	0.279253
lcl|NC_012582.1_cds_WP_000884888.1_333	0.328532	0.691862	0.299601
lcl|NC_012582.1_cds_WP_000885252.1_2517	0.31447	0.606444	0.283994
lcl|NC_012582.1_cds_WP_000886237.1_1909	0.291619	0.490474	0.247487
lcl|NC_012582.1_cds_WP_000887116.1_1722	0.288635	0.482036	0.260807
lcl|NC_012582.1_cds_WP_000887295.1_576	0.30144	0.52812	0.265581
lcl|NC_012582.1_cds_WP_000887349.1_1073	0.337145	0.737303	0.304073
lcl|NC_012582.1_cds_WP_000887576.1_1624	0.265695	0.464623	0.233495
lcl|NC_012582.1_cds_WP_000888099.1_553	0.264245	0.459806	0.229374
lcl|NC_012582.1_cds_WP_000888585.1_598	0.309264	0.646693	0.276291
lcl|NC_012582.1_cds_WP_000889971.1_1957	0.284573	0.521203	0.255795
lcl|NC_012582.1_cds_WP_000890132.1_864	0.285648	0.512384	0.248504
lcl|NC_012582.1_cds_WP_000890416.1_2303	0.291059	0.587594	0.261558
lcl|NC_012582.1_cds_WP_000891053.1_634	0.250044	0.404202	0.201364
lcl|NC_012582.1_cds_WP_000894086.1_291	0.274788	0.447207	0.245049
lcl|NC_012582.1_cds_WP_000894643.1_290	0.29289	0.567521	0.262165
lcl|NC_012582.1_cds_WP_000895172.1_2098	0.277731	0.445892	0.237202
lcl|NC_012582.1_cds_WP_000895407.1_1413	0.301372	0.561026	0.289854
lcl|NC_012582.1_cds_WP_000895452.1_1853	0.268232	0.447739	0.25456
lcl|NC_012582.1_cds_WP_000895771.1_256	0.268562	0.408843	0.213668
lcl|NC_012582.1_cds_WP_000896327.1_786	0.297853	0.624207	0.262307
lcl|NC_012582.1_cds_WP_000896515.1_187	0.310373	0.626419	0.274898
lcl|NC_012582.1_cds_WP_000896746.1_509	0.304608	0.674547	0.260149
lcl|NC_012582.1_cds_WP_000899908.1_52	0.282889	0.450925	0.254392
lcl|NC_012582.1_cds_WP_000902260.1_2016	0.271587	0.510844	0.23964
lcl|NC_012582.1_cds_WP_000902450.1_392	0.282311	0.509235	0.243557
lcl|NC_012582.1_cds_WP_000902906.1_1267	0.29471	0.540692	0.268218
lcl|NC_012582.1_cds_WP_000903293.1_1257	0.278587	0.514502	0.237093
lcl|NC_012582.1_cds_WP_000906485.1_548	0.350216	0.761685	0.315935
lcl|NC_012582.1_cds_WP_000907210.1_519	0.305019	0.502534	0.257549
lcl|NC_012582.1_cds_WP_000907265.1_2234	0.291836	0.561804	0.274571
lcl|NC_012582.1_cds_WP_000908213.1_104	0.281409	0.503757	0.238845
lcl|NC_012582.1_cds_WP_000908473.1_1598	0.282297	0.437838	0.243777
lcl|NC_012582.1_cds_WP_000909262.1_1794	0.292529	0.504708	0.257883
lcl|NC_012582.1_cds_WP_000909771.1_2369	0.292593	0.529914	0.239723
lcl|NC_012582.1_cds_WP_000911054.1_1392	0.296117	0.63633	0.265866
lcl|NC_012582.1_cds_WP_000911599.1_564	0.30075	0.517418	0.254528
lcl|NC_012582.1_cds_WP_000912209.1_112	0.252774	0.432926	0.223489
lcl|NC_012582.1_cds_WP_000913082.1_632	0.290991	0.508785	0.249879
lcl|NC_012582.1_cds_WP_000913180.1_1895	0.313887	0.595489	0.270738
lcl|NC_012582.1_cds_WP_000914637.1_1309	0.301603	0.582974	0.262647
lcl|NC_012582.1_cds_WP_000914817.1_2247	0.31053	0.655746	0.277624
lcl|NC_012582.1_cds_WP_000915500.1_1307	0.289223	0.566807	0.25767
lcl|NC_012582.1_cds_WP_000916246.1_278	0.261986	0.457788	0.236557
lcl|NC_012582.1_cds_WP_000916640.1_407	0.308905	0.672051	0.271741
lcl|NC_012582.1_cds_WP_000917529.1_1548	0.289408	0.527658	0.25233
lcl|NC_012582.1_cds_WP_000918350.1_242	0.312604	0.534548	0.27984
lcl|NC_012582.1_cds_WP_000918437.1_2152	0.31091	0.577724	0.264429
lcl|NC_012582.1_cds_WP_000919108.1_312	0.298591	0.537087	0.261582
lcl|NC_012582.1_cds_WP_000919135.1_913	0.319519	0.707745	0.285106
lcl|NC_012582.1_cds_WP_000920145.1_79	0.281202	0.543174	0.256808
lcl|NC_012582.1_cds_WP_000920410.1_769	0.26941	0.447105	0.235259
lcl|NC_012582.1_cds_WP_000921321.1_2650	0.285023	0.577353	0.247892
lcl|NC_012582.1_cds_WP_000923262.1_1028	0.277949	0.481816	0.239968
lcl|NC_012582.1_cds_WP_000923496.1_2396	0.278057	0.447048	0.233767
lcl|NC_012582.1_cds_WP_000925616.1_609	0.29128	0.534917	0.263136
lcl|NC_012582.1_cds_WP_000925681.1_2626	0.30382	0.514869	0.273304
lcl|NC_012582.1_cds_WP_000926116.1_2584	0.309999	0.755637	0.293188
lcl|NC_012582.1_cds_WP_000926911.1_1039	0.269129	0.512905	0.248514
lcl|NC_012582.1_cds_WP_000927463.1_2151	0.294138	0.531929	0.263323
lcl|NC_012582.1_cds_WP_000927682.1_1633	0.273065	0.425469	0.244004
lcl|NC_012582.1_cds_WP_000928231.1_902	0.313784	0.472906	0.263989
lcl|NC_012582.1_cds_WP_000929348.1_1783	0.30233	0.537519	0.266134
lcl|NC_012582.1_cds_WP_000929365.1_2228	0.29434	0.54462	0.2521
lcl|NC_012582.1_cds_WP_000929546.1_1885	0.284088	0.602056	0.243677
lcl|NC_012582.1_cds_WP_000930348.1_1942	0.278379	0.470027	0.240894
lcl|NC_012582.1_cds_WP_000932180.1_917	0.284434	0.657789	0.2649
lcl|NC_012582.1_cds_WP_000932201.1_1980	0.295508	0.512706	0.253822
lcl|NC_012582.1_cds_WP_000932415.1_1159	0.303575	0.593041	0.264039
lcl|NC_012582.1_cds_WP_000932672.1_649	0.28334	0.502676	0.243455
lcl|NC_012582.1_cds_WP_000933058.1_1260	0.321315	0.576693	0.287777
lcl|NC_012582.1_cds_WP_000933142.1_2206	0.295536	0.463137	0.259925
lcl|NC_012582.1_cds_WP_000933159.1_2332	0.287974	0.542964	0.253707
lcl|NC_012582.1_cds_WP_000933527.1_134	0.283953	0.515205	0.25077
lcl|NC_012582.1_cds_WP_000933835.1_1573	0.295822	0.526477	0.262674
lcl|NC_012582.1_cds_WP_000934529.1_525	0.292382	0.342235	0.239798
lcl|NC_012582.1_cds_WP_000934642.1_2220	0.300058	0.544097	0.254606
lcl|NC_012582.1_cds_WP_000935841.1_713	0.274316	0.465258	0.241502
lcl|NC_012582.1_cds_WP_000935885.1_1297	0.289541	0.535117	0.247527
lcl|NC_012582.1_cds_WP_000936745.1_1034	0.266299	0.458513	0.248929
lcl|NC_012582.1_cds_WP_000938461.1_2078	0.30153	0.59239	0.270469
lcl|NC_012582.1_cds_WP_000939287.1_2263	0.288031	0.512147	0.261897
lcl|NC_012582.1_cds_WP_000939696.1_1686	0.308062	0.495269	0.269121
lcl|NC_012582.1_cds_WP_000940152.1_2693	0.305965	0.508093	0.273927
lcl|NC_012582.1_cds_WP_000940284.1_71	0.3086	0.584792	0.270544
lcl|NC_012582.1_cds_WP_000940599.1_466	0.318588	0.830487	0.282808
lcl|NC_012582.1_cds_WP_000941106.1_699	0.324423	0.628898	0.286023
lcl|NC_012582.1_cds_WP_000941132.1_293	0.302028	0.599059	0.270913
lcl|NC_012582.1_cds_WP_000941219.1_2596	0.332251	0.777931	0.30327
lcl|NC_012582.1_cds_WP_000944163.1_751	0.312496	0.690145	0.286757
lcl|NC_012582.1_cds_WP_000944348.1_2259	0.282145	0.497286	0.242241
lcl|NC_012582.1_cds_WP_000945988.1_921	0.300024	0.530525	0.259266
lcl|NC_012582.1_cds_WP_000946515.1_1720	0.249147	0.439831	0.229283
lcl|NC_012582.1_cds_WP_000946626.1_505	0.288683	0.521582	0.243011
lcl|NC_012582.1_cds_WP_000947378.1_685	0.299234	0.523081	0.265653
lcl|NC_012582.1_cds_WP_000947600.1_1737	0.283617	0.482936	0.237962
lcl|NC_012582.1_cds_WP_000947937.1_904	0.268557	0.450733	0.239882
lcl|NC_012582.1_cds_WP_000948497.1_1166	0.28773	0.484168	0.254048
lcl|NC_012582.1_cds_WP_000949650.1_624	0.285623	0.521423	0.23605
lcl|NC_012582.1_cds_WP_000950604.1_2014	0.267332	0.457109	0.231135
lcl|NC_012582.1_cds_WP_000950840.1_1563	0.292655	0.562838	0.259734
lcl|NC_012582.1_cds_WP_000951035.1_99	0.297128	0.590449	0.272362
lcl|NC_012582.1_cds_WP_000951359.1_541	0.281786	0.548497	0.252462
lcl|NC_012582.1_cds_WP_000951431.1_1677	0.291273	0.524887	0.257449
lcl|NC_012582.1_cds_WP_000951475.1_1552	0.302269	0.58689	0.264289
lcl|NC_012582.1_cds_WP_000952227.1_665	0.286954	0.507435	0.240865
lcl|NC_012582.1_cds_WP_000952783.1_709	0.284194	0.500636	0.232627
lcl|NC_012582.1_cds_WP_000952871.1_447	0.288017	0.440902	0.239514
lcl|NC_012582.1_cds_WP_000953212.1_651	0.275875	0.450167	0.249834
lcl|NC_012582.1_cds_WP_000953509.1_517	0.286085	0.488724	0.251129
lcl|NC_012582.1_cds_WP_000954223.1_215	0.307397	0.559024	0.265353
lcl|NC_012582.1_cds_WP_000954366.1_980	0.29742	0.526649	0.248451
lcl|NC_012582.1_cds_WP_000954514.1_114	0.273118	0.431492	0.236659
lcl|NC_012582.1_cds_WP_000955020.1_23	0.291663	0.465109	0.245277
lcl|NC_012582.1_cds_WP_000955540.1_2354	0.268408	0.45826	0.242939
lcl|NC_012582.1_cds_WP_000956112.1_859	0.274441	0.495839	0.266932
lcl|NC_012582.1_cds_WP_000956295.1_1057	0.325037	0.612994	0.292664
lcl|NC_012582.1_cds_WP_000956389.1_1902	0.276385	0.485713	0.248949
lcl|NC_012582.1_cds_WP_000957200.1_2437	0.293787	0.50914	0.267448
lcl|NC_012582.1_cds_WP_000957331.1_484	0.302982	0.524775	0.263247
lcl|NC_012582.1_cds_WP_000958000.1_154	0.296897	0.46564	0.257286
lcl|NC_012582.1_cds_WP_000958712.1_1592	0.266842	0.43872	0.235937
lcl|NC_012582.1_cds_WP_000960246.1_2401	0.297168	0.468566	0.270163
lcl|NC_012582.1_cds_WP_000960255.1_2394	0.268675	0.490556	0.237138
lcl|NC_012582.1_cds_WP_000961035.1_771	0.25551	0.467665	0.226024
lcl|NC_012582.1_cds_WP_000961183.1_331	0.296012	0.534993	0.250369
lcl|NC_012582.1_cds_WP_000962042.1_2624	0.295951	0.549792	0.25738
lcl|NC_012582.1_cds_WP_000963390.1_946	0.298313	0.589408	0.275358
lcl|NC_012582.1_cds_WP_000964320.1_679	0.316617	0.711497	0.293138
lcl|NC_012582.1_cds_WP_000965050.1_2137	0.299884	0.470595	0.27091
lcl|NC_012582.1_cds_WP_000965608.1_177	0.318745	0.622728	0.283449
lcl|NC_012582.1_cds_WP_000966885.1_1549	0.303669	0.527988	0.26449
lcl|NC_012582.1_cds_WP_000967004.1_1763	0.277153	0.48729	0.252119
lcl|NC_012582.1_cds_WP_000969331.1_1963	0.30689	0.64745	0.276927
lcl|NC_012582.1_cds_WP_000969495.1_1402	0.308192	0.582738	0.260992
lcl|NC_012582.1_cds_WP_000969503.1_1645	0.288228	0.484176	0.237494
lcl|NC_012582.1_cds_WP_000970286.1_772	0.293083	0.498639	0.247919
lcl|NC_012582.1_cds_WP_000971085.1_412	0.305594	0.517057	0.283366
lcl|NC_012582.1_cds_WP_000971687.1_2339	0.287452	0.49315	0.248726
lcl|NC_012582.1_cds_WP_000972038.1_1873	0.276055	0.514557	0.248954
lcl|NC_012582.1_cds_WP_000972597.1_499	0.299335	0.541322	0.262679
lcl|NC_012582.1_cds_WP_000972853.1_425	0.336245	0.679249	0.290424
lcl|NC_012582.1_cds_WP_000973003.1_325	0.270742	0.456813	0.231936
lcl|NC_012582.1_cds_WP_000973535.1_470	0.289691	0.503847	0.248523
lcl|NC_012582.1_cds_WP_000974439.1_1945	0.291605	0.50672	0.251393
lcl|NC_012582.1_cds_WP_000974697.1_1454	0.272767	0.472557	0.240611
lcl|NC_012582.1_cds_WP_000978825.1_908	0.289878	0.471402	0.242792
lcl|NC_012582.1_cds_WP_000978983.1_589	0.261195	0.424299	0.240087
lcl|NC_012582.1_cds_WP_000979041.1_730	0.296029	0.497642	0.274607
lcl|NC_012582.1_cds_WP_000979180.1_72	0.274956	0.456167	0.221532
lcl|NC_012582.1_cds_WP_000979769.1_127	0.341857	0.63611	0.296185
lcl|NC_012582.1_cds_WP_000979815.1_2372	0.313546	0.578848	0.264781
lcl|NC_012582.1_cds_WP_000980009.1_1358	0.296348	0.578821	0.25049
lcl|NC_012582.1_cds_WP_000981941.1_645	0.288697	0.484697	0.252832
lcl|NC_012582.1_cds_WP_000982362.1_2097	0.264227	0.470685	0.232096
lcl|NC_012582.1_cds_WP_000983169.1_1775	0.278977	0.505921	0.254526
lcl|NC_012582.1_cds_WP_000983782.1_2486	0.287671	0.504775	0.252097
lcl|NC_012582.1_cds_WP_000984103.1_1623	0.278377	0.505717	0.241396
lcl|NC_012582.1_cds_WP_000985183.1_501	0.333904	0.772798	0.297739
lcl|NC_012582.1_cds_WP_000985828.1_1035	0.292361	0.597697	0.255641
lcl|NC_012582.1_cds_WP_000985860.1_2103	0.287227	0.47108	0.245067
lcl|NC_012582.1_cds_WP_000987183.1_1480	0.324527	0.600329	0.286161
lcl|NC_012582.1_cds_WP_000987577.1_2333	0.306665	0.557428	0.267979
lcl|NC_012582.1_cds_WP_000988005.1_2476	0.272787	0.516169	0.240713
lcl|NC_012582.1_cds_WP_000990418.1_50	0.257082	0.451767	0.230619
lcl|NC_012582.1_cds_WP_000990933.1_910	0.242254	0.454457	0.221782
lcl|NC_012582.1_cds_WP_000991933.1_2056	0.298884	0.54155	0.253339
lcl|NC_012582.1_cds_WP_000992437.1_1849	0.283633	0.493774	0.247011
lcl|NC_012582.1_cds_WP_000993150.1_2211	0.289884	0.510606	0.256325
lcl|NC_012582.1_cds_WP_000993360.1_2569	0.294273	0.568155	0.265561
lcl|NC_012582.1_cds_WP_000995897.1_1270	0.295898	0.528757	0.270882
lcl|NC_012582.1_cds_WP_000996146.1_2121	0.274834	0.44433	0.250114
lcl|NC_012582.1_cds_WP_000996178.1_2535	0.304649	0.551751	0.269335
lcl|NC_012582.1_cds_WP_000996595.1_1135	0.285731	0.576512	0.258966
lcl|NC_012582.1_cds_WP_000996595.1_1192	0.285731	0.576512	0.258966
lcl|NC_012582.1_cds_WP_000996996.1_2179	0.312643	0.612269	0.268327
lcl|NC_012582.1_cds_WP_000997093.1_755	0.260908	0.486013	0.223909
lcl|NC_012582.1_cds_WP_000999561.1_1956	0.288579	0.565994	0.23322
lcl|NC_012582.1_cds_WP_000999601.1_1932	0.299935	0.580114	0.268196
lcl|NC_012582.1_cds_WP_001001301.1_929	0.317711	0.614196	0.28415
lcl|NC_012582.1_cds_WP_001002871.1_2068	0.283654	0.53089	0.248276
lcl|NC_012582.1_cds_WP_001002907.1_1453	0.303257	0.489431	0.249266
lcl|NC_012582.1_cds_WP_001003303.1_96	0.281315	0.540569	0.256753
lcl|NC_012582.1_cds_WP_001003394.1_777	0.300511	0.599932	0.275274
lcl|NC_012582.1_cds_WP_001003593.1_2652	0.298857	0.571439	0.262582
lcl|NC_012582.1_cds_WP_001003650.1_1139	0.298681	0.517745	0.263871
lcl|NC_012582.1_cds_WP_001003650.1_1188	0.298681	0.517745	0.263871
lcl|NC_012582.1_cds_WP_001004599.1_220	0.263755	0.45159	0.249365
lcl|NC_012582.1_cds_WP_001005346.1_2479	0.28069	0.517384	0.222828
lcl|NC_012582.1_cds_WP_001005953.1_58	0.306933	0.593996	0.263198
lcl|NC_012582.1_cds_WP_001006407.1_1397	0.282553	0.552966	0.246769
lcl|NC_012582.1_cds_WP_001007798.1_1047	0.268506	0.437604	0.216035
lcl|NC_012582.1_cds_WP_001007814.1_1702	0.295452	0.508567	0.259483
lcl|NC_012582.1_cds_WP_001007981.1_2230	0.284289	0.479781	0.257232
lcl|NC_012582.1_cds_WP_001008007.1_1822	0.284357	0.435499	0.235122
lcl|NC_012582.1_cds_WP_001009479.1_347	0.291777	0.520762	0.250303
lcl|NC_012582.1_cds_WP_001012522.1_403	0.286547	0.476859	0.245294
lcl|NC_012582.1_cds_WP_001013120.1_962	0.301574	0.560683	0.266681
lcl|NC_012582.1_cds_WP_001013815.1_1368	0.308013	0.516504	0.26305
lcl|NC_012582.1_cds_WP_001013838.1_2515	0.280074	0.347817	0.260078
lcl|NC_012582.1_cds_WP_001015358.1_2707	0.283357	0.556499	0.252273
lcl|NC_012582.1_cds_WP_001015481.1_578	0.30195	0.577173	0.269124
lcl|NC_012582.1_cds_WP_001015557.1_1644	0.281104	0.468806	0.255229
lcl|NC_012582.1_cds_WP_001015826.1_1785	0.292871	0.607407	0.270719
lcl|NC_012582.1_cds_WP_001016499.1_2150	0.280124	0.497003	0.235857
lcl|NC_012582.1_cds_WP_001016934.1_321	0.273975	0.498261	0.241067
lcl|NC_012582.1_cds_WP_001017843.1_2242	0.260225	0.418838	0.237048
lcl|NC_012582.1_cds_WP_001018084.1_1160	0.296996	0.510875	0.249032
lcl|NC_012582.1_cds_WP_001018813.1_1747	0.320036	0.664993	0.284446
lcl|NC_012582.1_cds_WP_001018908.1_2600	0.346593	0.789144	0.319144
lcl|NC_012582.1_cds_WP_001019422.1_666	0.274887	0.440574	0.234349
lcl|NC_012582.1_cds_WP_001019828.1_305	0.328897	0.689278	0.296814
lcl|NC_012582.1_cds_WP_001020612.1_1954	0.299387	0.517016	0.266006
lcl|NC_012582.1_cds_WP_001021735.1_2041	0.293157	0.510621	0.251564
lcl|NC_012582.1_cds_WP_001022337.1_814	0.290487	0.510885	0.259327
lcl|NC_012582.1_cds_WP_001022809.1_199	0.268865	0.453653	0.243997
lcl|NC_012582.1_cds_WP_001023164.1_964	0.321566	0.690308	0.296052
lcl|NC_012582.1_cds_WP_001023767.1_267	0.289535	0.485552	0.243835
lcl|NC_012582.1_cds_WP_001025288.1_2114	0.325595	0.657984	0.290553
lcl|NC_012582.1_cds_WP_001025909.1_2643	0.280331	0.492579	0.247691
lcl|NC_012582.1_cds_WP_001026274.1_2667	0.305299	0.667906	0.272406
lcl|NC_012582.1_cds_WP_001027396.1_944	0.262179	0.458009	0.211511
lcl|NC_012582.1_cds_WP_001028258.1_1865	0.276769	0.539994	0.242018
lcl|NC_012582.1_cds_WP_001028571.1_2330	0.279544	0.500838	0.246243
lcl|NC_012582.1_cds_WP_001029054.1_1111	0.315926	0.539194	0.276912
lcl|NC_012582.1_cds_WP_001029054.1_1216	0.315926	0.539194	0.276912
lcl|NC_012582.1_cds_WP_001029276.1_1129	0.339533	0.613031	0.30787
lcl|NC_012582.1_cds_WP_001029276.1_1198	0.339533	0.613031	0.30787
lcl|NC_012582.1_cds_WP_001030089.1_2169	0.314949	0.603375	0.28548
lcl|NC_012582.1_cds_WP_001030227.1_1241	0.302765	0.574442	0.274014
lcl|NC_012582.1_cds_WP_001030417.1_2107	0.272853	0.433392	0.240498
lcl|NC_012582.1_cds_WP_001030451.1_952	0.286036	0.463209	0.256097
lcl|NC_012582.1_cds_WP_001032340.1_1619	0.265883	0.500572	0.23486
lcl|NC_012582.1_cds_WP_001032751.1_1099	0.275329	0.519934	0.264209
lcl|NC_012582.1_cds_WP_001032751.1_1228	0.275329	0.519934	0.264209
lcl|NC_012582.1_cds_WP_001032890.1_1476	0.282613	0.524572	0.244423
lcl|NC_012582.1_cds_WP_001035064.1_2092	0.290489	0.510456	0.243694
lcl|NC_012582.1_cds_WP_001035410.1_9	0.274788	0.431479	0.244176
lcl|NC_012582.1_cds_WP_001036868.1_271	0.276808	0.43831	0.242655
lcl|NC_012582.1_cds_WP_001038923.1_2415	0.284493	0.527424	0.253436
lcl|NC_012582.1_cds_WP_001039257.1_887	0.275092	0.527945	0.241628
lcl|NC_012582.1_cds_WP_001040192.1_1790	0.315581	0.657819	0.3116
lcl|NC_012582.1_cds_WP_001040221.1_157	0.325683	0.711185	0.301727
lcl|NC_012582.1_cds_WP_001040926.1_2586	0.323258	0.779214	0.287453
lcl|NC_012582.1_cds_WP_001041874.1_2261	0.298136	0.571931	0.26706
lcl|NC_012582.1_cds_WP_001043985.1_1705	0.280838	0.46726	0.226511
lcl|NC_012582.1_cds_WP_001044376.1_1730	0.264679	0.450656	0.227897
lcl|NC_012582.1_cds_WP_001044400.1_2142	0.290217	0.544051	0.263117
lcl|NC_012582.1_cds_WP_001044507.1_297	0.321097	0.7894	0.295325
lcl|NC_012582.1_cds_WP_001044516.1_1964	0.32265	0.753721	0.304297
lcl|NC_012582.1_cds_WP_001044900.1_391	0.282354	0.486216	0.242605
lcl|NC_012582.1_cds_WP_001045549.1_1605	0.308931	0.613138	0.273447
lcl|NC_012582.1_cds_WP_001045819.1_444	0.283251	0.456208	0.23711
lcl|NC_012582.1_cds_WP_001045827.1_1071	0.286087	0.614622	0.25521
lcl|NC_012582.1_cds_WP_001045921.1_719	0.269145	0.459896	0.232263
lcl|NC_012582.1_cds_WP_001045943.1_975	0.294407	0.503535	0.256702
lcl|NC_012582.1_cds_WP_001046693.1_850	0.359142	0.602198	0.297697
lcl|NC_012582.1_cds_WP_001047611.1_1965	0.312127	0.608548	0.275672
lcl|NC_012582.1_cds_WP_001048578.1_2124	0.334342	0.695646	0.298457
lcl|NC_012582.1_cds_WP_001048716.1_195	0.271756	0.470409	0.23449
lcl|NC_012582.1_cds_WP_001048829.1_1146	0.287569	0.55155	0.253859
lcl|NC_012582.1_cds_WP_001051767.1_323	0.28127	0.430361	0.239023
lcl|NC_012582.1_cds_WP_001051801.1_248	0.305295	0.692599	0.280621
lcl|NC_012582.1_cds_WP_001051872.1_381	0.306249	0.707337	0.299498
lcl|NC_012582.1_cds_WP_001052610.1_2309	0.278108	0.492725	0.232826
lcl|NC_012582.1_cds_WP_001052672.1_1519	0.314738	0.57599	0.285058
lcl|NC_012582.1_cds_WP_001052672.1_1526	0.314738	0.57599	0.285058
lcl|NC_012582.1_cds_WP_001052672.1_1533	0.314738	0.57599	0.285058
lcl|NC_012582.1_cds_WP_001052933.1_1824	0.26612	0.450437	0.231435
lcl|NC_012582.1_cds_WP_001054291.1_629	0.292638	0.613238	0.278319
lcl|NC_012582.1_cds_WP_001054524.1_345	0.332302	0.676104	0.296658
lcl|NC_012582.1_cds_WP_001054630.1_2037	0.280514	0.485313	0.248835
lcl|NC_012582.1_cds_WP_001054771.1_496	0.282189	0.530351	0.245764
lcl|NC_012582.1_cds_WP_001055412.1_2021	0.268208	0.457966	0.247663
lcl|NC_012582.1_cds_WP_001056548.1_1823	0.275875	0.467524	0.231314
lcl|NC_012582.1_cds_WP_001057745.1_978	0.288825	0.549445	0.258128
lcl|NC_012582.1_cds_WP_001057884.1_300	0.317008	0.664228	0.286005
lcl|NC_012582.1_cds_WP_001057922.1_2564	0.306619	0.568698	0.260168
lcl|NC_012582.1_cds_WP_001058123.1_1254	0.321684	0.639584	0.293121
lcl|NC_012582.1_cds_WP_001058664.1_292	0.301094	0.535822	0.264724
lcl|NC_012582.1_cds_WP_001059182.1_1846	0.2495	0.38079	0.199581
lcl|NC_012582.1_cds_WP_001060348.1_265	0.276258	0.418074	0.242073
lcl|NC_012582.1_cds_WP_001060891.1_1063	0.293978	0.558355	0.255413
lcl|NC_012582.1_cds_WP_001061290.1_1930	0.290588	0.508158	0.254581
lcl|NC_012582.1_cds_WP_001061739.1_1474	0.291747	0.564721	0.263125
lcl|NC_012582.1_cds_WP_001061937.1_1008	0.313584	0.61373	0.271755
lcl|NC_012582.1_cds_WP_001061948.1_530	0.267265	0.496309	0.236968
lcl|NC_012582.1_cds_WP_001062034.1_590	0.335752	0.578423	0.293071
lcl|NC_012582.1_cds_WP_001062354.1_1939	0.273247	0.526708	0.225767
lcl|NC_012582.1_cds_WP_001063909.1_1362	0.282425	0.516337	0.240865
lcl|NC_012582.1_cds_WP_001064711.1_1847	0.276287	0.360683	0.228183
lcl|NC_012582.1_cds_WP_001064847.1_2500	0.304322	0.573033	0.263967
lcl|NC_012582.1_cds_WP_001065601.1_1144	0.293205	0.544449	0.249883
lcl|NC_012582.1_cds_WP_001065601.1_1183	0.293205	0.544449	0.249883
lcl|NC_012582.1_cds_WP_001066162.1_2676	0.280387	0.494056	0.245855
lcl|NC_012582.1_cds_WP_001067502.1_1154	0.295117	0.553668	0.25937
lcl|NC_012582.1_cds_WP_001067680.1_46	0.273015	0.453441	0.236607
lcl|NC_012582.1_cds_WP_001068121.1_2044	0.258703	0.533547	0.255406
lcl|NC_012582.1_cds_WP_001068374.1_1178	0.304423	0.60539	0.273415
lcl|NC_012582.1_cds_WP_001068896.1_1641	0.286357	0.509641	0.247859
lcl|NC_012582.1_cds_WP_001068942.1_178	0.249668	0.436862	0.217286
lcl|NC_012582.1_cds_WP_001069038.1_1269	0.283518	0.528786	0.242357
lcl|NC_012582.1_cds_WP_001069570.1_1377	0.284688	0.498045	0.255083
lcl|NC_012582.1_cds_WP_001069622.1_2094	0.295752	0.526343	0.244607
lcl|NC_012582.1_cds_WP_001069849.1_1806	0.281528	0.570793	0.254309
lcl|NC_012582.1_cds_WP_001070209.1_2571	0.25663	0.477145	0.243694
lcl|NC_012582.1_cds_WP_001070278.1_703	0.273709	0.481009	0.240391
lcl|NC_012582.1_cds_WP_001070819.1_1567	0.271017	0.422936	0.228201
lcl|NC_012582.1_cds_WP_001071440.1_1636	0.302827	0.570984	0.255104
lcl|NC_012582.1_cds_WP_001074156.1_235	0.304417	0.573501	0.264888
lcl|NC_012582.1_cds_WP_001075912.1_1315	0.327484	0.719003	0.295482
lcl|NC_012582.1_cds_WP_001076091.1_1866	0.297264	0.541525	0.268561
lcl|NC_012582.1_cds_WP_001076442.1_120	0.282592	0.516004	0.254102
lcl|NC_012582.1_cds_WP_001077794.1_1547	0.293842	0.540354	0.256181
lcl|NC_012582.1_cds_WP_001078087.1_2015	0.270366	0.495735	0.247309
lcl|NC_012582.1_cds_WP_001079839.1_539	0.294909	0.642461	0.260931
lcl|NC_012582.1_cds_WP_001080121.1_919	0.28291	0.474277	0.2435
lcl|NC_012582.1_cds_WP_001080338.1_1861	0.248576	0.469035	0.241232
lcl|NC_012582.1_cds_WP_001080438.1_884	0.278667	0.524743	0.238817
lcl|NC_012582.1_cds_WP_001081182.1_453	0.295803	0.489807	0.25347
lcl|NC_012582.1_cds_WP_001081509.1_2273	0.285777	0.542736	0.256263
lcl|NC_012582.1_cds_WP_001082165.1_413	0.293618	0.587527	0.236552
lcl|NC_012582.1_cds_WP_001082343.1_2545	0.272124	0.471193	0.238839
lcl|NC_012582.1_cds_WP_001082992.1_1171	0.291478	0.523099	0.252066
lcl|NC_012582.1_cds_WP_001083161.1_1236	0.297909	0.599156	0.268038
lcl|NC_012582.1_cds_WP_001084301.1_677	0.282535	0.488217	0.254426
lcl|NC_012582.1_cds_WP_001084849.1_2025	0.277746	0.47752	0.254997
lcl|NC_012582.1_cds_WP_001085086.1_377	0.304688	0.455181	0.247937
lcl|NC_012582.1_cds_WP_001085485.1_2272	0.274828	0.501445	0.247331
lcl|NC_012582.1_cds_WP_001085796.1_358	0.306316	0.781721	0.30441
lcl|NC_012582.1_cds_WP_001086043.1_716	0.279716	0.50689	0.255113
lcl|NC_012582.1_cds_WP_001086372.1_872	0.271737	0.481279	0.234159
lcl|NC_012582.1_cds_WP_001086615.1_1715	0.28108	0.449364	0.250934
lcl|NC_012582.1_cds_WP_001087261.1_488	0.296117	0.572294	0.273085
lcl|NC_012582.1_cds_WP_001087426.1_1396	0.301956	0.565586	0.265482
lcl|NC_012582.1_cds_WP_001087495.1_523	0.288121	0.545345	0.260256
lcl|NC_012582.1_cds_WP_001088158.1_494	0.297144	0.516058	0.251338
lcl|NC_012582.1_cds_WP_001088888.1_1357	0.28797	0.536347	0.255083
lcl|NC_012582.1_cds_WP_001089203.1_1308	0.281056	0.501314	0.249889
lcl|NC_012582.1_cds_WP_001089654.1_928	0.28425	0.506047	0.25882
lcl|NC_012582.1_cds_WP_001090275.1_294	0.277411	0.486804	0.247484
lcl|NC_012582.1_cds_WP_001090433.1_1983	0.29047	0.456166	0.254163
lcl|NC_012582.1_cds_WP_001091138.1_742	0.265573	0.544661	0.247544
lcl|NC_012582.1_cds_WP_001091359.1_2312	0.288703	0.643039	0.255027
lcl|NC_012582.1_cds_WP_001093848.1_1163	0.303399	0.616824	0.270271
lcl|NC_012582.1_cds_WP_001094789.1_2193	0.289924	0.557149	0.249762
lcl|NC_012582.1_cds_WP_001095848.1_1414	0.311289	0.614807	0.291509
lcl|NC_012582.1_cds_WP_001096208.1_2591	0.330531	0.697693	0.304811
lcl|NC_012582.1_cds_WP_001096418.1_1237	0.317608	0.645986	0.278397
lcl|NC_012582.1_cds_WP_001096673.1_359	0.322064	0.81566	0.306353
lcl|NC_012582.1_cds_WP_001096736.1_1100	0.285001	0.537048	0.28023
lcl|NC_012582.1_cds_WP_001096736.1_1227	0.285001	0.537048	0.28023
lcl|NC_012582.1_cds_WP_001097338.1_1499	0.27957	0.496952	0.249697
lcl|NC_012582.1_cds_WP_001098051.1_2260	0.297857	0.513064	0.243627
lcl|NC_012582.1_cds_WP_001098618.1_1360	0.294482	0.695112	0.285099
lcl|NC_012582.1_cds_WP_001099261.1_193	0.320395	0.586631	0.286394
lcl|NC_012582.1_cds_WP_001102807.1_132	0.304188	0.557952	0.280597
lcl|NC_012582.1_cds_WP_001104251.1_971	0.282199	0.543544	0.253874
lcl|NC_012582.1_cds_WP_001104320.1_337	0.292163	0.545165	0.248362
lcl|NC_012582.1_cds_WP_001104702.1_510	0.270744	0.463379	0.236809
lcl|NC_012582.1_cds_WP_001105346.1_1119	0.295833	0.574338	0.258984
lcl|NC_012582.1_cds_WP_001105346.1_1208	0.295833	0.574338	0.258984
lcl|NC_012582.1_cds_WP_001105747.1_735	0.290102	0.484139	0.254925
lcl|NC_012582.1_cds_WP_001106126.1_207	0.304584	0.494274	0.245259
lcl|NC_012582.1_cds_WP_001106433.1_591	0.282529	0.470376	0.242201
lcl|NC_012582.1_cds_WP_001107728.1_828	0.281079	0.485366	0.251027
lcl|NC_012582.1_cds_WP_001108094.1_883	0.306607	0.606335	0.251243
lcl|NC_012582.1_cds_WP_001108807.1_1435	0.291516	0.516611	0.255616
lcl|NC_012582.1_cds_WP_001109956.1_1025	0.310039	0.597663	0.260501
lcl|NC_012582.1_cds_WP_001110873.1_2559	0.266943	0.458091	0.234155
lcl|NC_012582.1_cds_WP_001111411.1_648	0.29602	0.511741	0.262268
lcl|NC_012582.1_cds_WP_001112968.1_338	0.284955	0.512915	0.247727
lcl|NC_012582.1_cds_WP_001113134.1_2213	0.331442	0.721491	0.304428
lcl|NC_012582.1_cds_WP_001113844.1_2385	0.279235	0.464573	0.242749
lcl|NC_012582.1_cds_WP_001114117.1_583	0.286708	0.511455	0.244872
lcl|NC_012582.1_cds_WP_001114647.1_250	0.280087	0.505144	0.252769
lcl|NC_012582.1_cds_WP_001117042.1_42	0.29755	0.483348	0.275463
lcl|NC_012582.1_cds_WP_001118351.1_1576	0.291647	0.582874	0.263998
lcl|NC_012582.1_cds_WP_001118870.1_2580	0.304363	0.743833	0.295002
lcl|NC_012582.1_cds_WP_001118926.1_2590	0.315294	0.73562	0.31368
lcl|NC_012582.1_cds_WP_001120173.1_2664	0.286857	0.480318	0.245395
lcl|NC_012582.1_cds_WP_001120309.1_702	0.2487	0.401252	0.221065
lcl|NC_012582.1_cds_WP_001121000.1_1114	0.289672	0.556681	0.267601
lcl|NC_012582.1_cds_WP_001121000.1_1213	0.289672	0.556681	0.267601
lcl|NC_012582.1_cds_WP_001122154.1_435	0.297277	0.496925	0.25842
lcl|NC_012582.1_cds_WP_001122865.1_2294	0.314862	0.58525	0.277091
lcl|NC_012582.1_cds_WP_001123168.1_2081	0.272611	0.610393	0.267029
lcl|NC_012582.1_cds_WP_001123234.1_516	0.300888	0.554441	0.274153
lcl|NC_012582.1_cds_WP_001123591.1_1274	0.334052	0.752034	0.299877
lcl|NC_012582.1_cds_WP_001123656.1_639	0.349306	0.686237	0.316028
lcl|NC_012582.1_cds_WP_001124187.1_737	0.274667	0.577332	0.229934
lcl|NC_012582.1_cds_WP_001125593.1_1121	0.273494	0.52096	0.242711
lcl|NC_012582.1_cds_WP_001125593.1_1206	0.273494	0.52096	0.242711
lcl|NC_012582.1_cds_WP_001125921.1_927	0.29441	0.583352	0.25835
lcl|NC_012582.1_cds_WP_001126441.1_2403	0.33174	0.736205	0.297838
lcl|NC_012582.1_cds_WP_001127296.1_213	0.255446	0.500913	0.240177
lcl|NC_012582.1_cds_WP_001127457.1_148	0.312967	0.59494	0.283576
lcl|NC_012582.1_cds_WP_001128513.1_1336	0.275183	0.485001	0.240797
lcl|NC_012582.1_cds_WP_001128805.1_1564	0.300831	0.58978	0.26357
lcl|NC_012582.1_cds_WP_001128844.1_1738	0.293807	0.558045	0.268555
lcl|NC_012582.1_cds_WP_001129600.1_1618	0.286205	0.493066	0.264182
lcl|NC_012582.1_cds_WP_001129785.1_2161	0.29262	0.562895	0.256785
lcl|NC_012582.1_cds_WP_001129895.1_1614	0.32068	0.614715	0.274695
lcl|NC_012582.1_cds_WP_001130104.1_1049	0.276729	0.49349	0.243761
lcl|NC_012582.1_cds_WP_001130227.1_556	0.322628	0.626359	0.286486
lcl|NC_012582.1_cds_WP_001130865.1_2651	0.29598	0.535007	0.247342
lcl|NC_012582.1_cds_WP_001131982.1_2296	0.274311	0.498755	0.245484
lcl|NC_012582.1_cds_WP_001132255.1_1947	0.297927	0.574392	0.265525
lcl|NC_012582.1_cds_WP_001132585.1_1044	0.265071	0.492251	0.244351
lcl|NC_012582.1_cds_WP_001133286.1_2672	0.287995	0.446205	0.222066
lcl|NC_012582.1_cds_WP_001133791.1_418	0.296856	0.50582	0.253466
lcl|NC_012582.1_cds_WP_001135560.1_667	0.296561	0.51184	0.250856
lcl|NC_012582.1_cds_WP_001135899.1_2540	0.311623	0.636514	0.29537
lcl|NC_012582.1_cds_WP_001137099.1_1364	0.315834	0.660802	0.27129
lcl|NC_012582.1_cds_WP_001137975.1_2422	0.268425	0.47833	0.242518
lcl|NC_012582.1_cds_WP_001138050.1_394	0.313752	0.795162	0.312615
lcl|NC_012582.1_cds_WP_001138114.1_2599	0.289143	0.665076	0.266183
lcl|NC_012582.1_cds_WP_001138886.1_1565	0.316795	0.67779	0.271998
lcl|NC_012582.1_cds_WP_001139091.1_1430	0.295729	0.58981	0.264724
lcl|NC_012582.1_cds_WP_001140312.1_2336	0.285712	0.482198	0.244606
lcl|NC_012582.1_cds_WP_001140461.1_744	0.330636	0.623212	0.284355
lcl|NC_012582.1_cds_WP_001141706.1_2510	0.302618	0.539	0.245327
lcl|NC_012582.1_cds_WP_001142129.1_1371	0.279716	0.503704	0.257631
lcl|NC_012582.1_cds_WP_001142855.1_1156	0.312365	0.689913	0.279617
lcl|NC_012582.1_cds_WP_001142930.1_1467	0.29775	0.807973	0.286292
lcl|NC_012582.1_cds_WP_001143309.1_1698	0.268382	0.439922	0.214291
lcl|NC_012582.1_cds_WP_001143862.1_1450	0.252832	0.403213	0.220257
lcl|NC_012582.1_cds_WP_001144972.1_279	0.270132	0.478498	0.233075
lcl|NC_012582.1_cds_WP_001145047.1_1084	0.274141	0.484432	0.236336
lcl|NC_012582.1_cds_WP_001145580.1_2075	0.322291	0.787825	0.29902
lcl|NC_012582.1_cds_WP_001145625.1_521	0.311269	0.763672	0.329283
lcl|NC_012582.1_cds_WP_001145807.1_332	0.311643	0.6555	0.283151
lcl|NC_012582.1_cds_WP_001145863.1_566	0.285383	0.546618	0.26632
lcl|NC_012582.1_cds_WP_001146753.1_1632	0.278078	0.491433	0.23474
lcl|NC_012582.1_cds_WP_001147108.1_1141	0.281022	0.557315	0.242267
lcl|NC_012582.1_cds_WP_001147108.1_1186	0.281022	0.557315	0.242267
lcl|NC_012582.1_cds_WP_001148228.1_1952	0.250638	0.403491	0.220127
lcl|NC_012582.1_cds_WP_001148353.1_571	0.303349	0.566253	0.275876
lcl|NC_012582.1_cds_WP_001148833.1_2568	0.284346	0.462379	0.253074
lcl|NC_012582.1_cds_WP_001149662.1_59	0.301795	0.549498	0.263612
lcl|NC_012582.1_cds_WP_001150037.1_2448	0.299383	0.522019	0.260488
lcl|NC_012582.1_cds_WP_001151639.1_2492	0.293664	0.580922	0.269038
lcl|NC_012582.1_cds_WP_001153532.1_503	0.280254	0.47983	0.250645
lcl|NC_012582.1_cds_WP_001153987.1_2311	0.270416	0.464134	0.231448
lcl|NC_012582.1_cds_WP_001157059.1_940	0.285843	0.554453	0.239357
lcl|NC_012582.1_cds_WP_001157107.1_386	0.308804	0.57168	0.285423
lcl|NC_012582.1_cds_WP_001157869.1_926	0.325361	0.725252	0.293644
lcl|NC_012582.1_cds_WP_001158196.1_2018	0.292159	0.526639	0.260238
lcl|NC_012582.1_cds_WP_001158897.1_2657	0.294651	0.600302	0.270004
lcl|NC_012582.1_cds_WP_001159461.1_715	0.304321	0.561156	0.257938
lcl|NC_012582.1_cds_WP_001160170.1_863	0.265916	0.541905	0.243793
lcl|NC_012582.1_cds_WP_001160591.1_196	0.27058	0.475288	0.249048
lcl|NC_012582.1_cds_WP_001161137.1_923	0.309976	0.602387	0.280721
lcl|NC_012582.1_cds_WP_001161489.1_1518	0.281144	0.367703	0.260233
lcl|NC_012582.1_cds_WP_001161489.1_1525	0.281144	0.367703	0.260233
lcl|NC_012582.1_cds_WP_001161489.1_1532	0.281144	0.367703	0.260233
lcl|NC_012582.1_cds_WP_001162087.1_2578	0.307425	0.679048	0.290917
lcl|NC_012582.1_cds_WP_001162850.1_740	0.32057	0.642061	0.292433
lcl|NC_012582.1_cds_WP_001163258.1_341	0.272644	0.455671	0.235315
lcl|NC_012582.1_cds_WP_001164219.1_1283	0.340478	0.72209	0.310809
lcl|NC_012582.1_cds_WP_001164257.1_2552	0.286749	0.47333	0.236042
lcl|NC_012582.1_cds_WP_001166105.1_1962	0.262081	0.464004	0.226006
lcl|NC_012582.1_cds_WP_001166592.1_2659	0.343111	0.734877	0.30193
lcl|NC_012582.1_cds_WP_001166643.1_2537	0.295081	0.587762	0.252879
lcl|NC_012582.1_cds_WP_001167409.1_939	0.271188	0.453893	0.25234
lcl|NC_012582.1_cds_WP_001167849.1_2459	0.284769	0.553028	0.260541
lcl|NC_012582.1_cds_WP_001171116.1_2550	0.309675	0.574188	0.268506
lcl|NC_012582.1_cds_WP_001172310.1_4	0.294796	0.536196	0.249018
lcl|NC_012582.1_cds_WP_001173022.1_824	0.302955	0.416625	0.255275
lcl|NC_012582.1_cds_WP_001173525.1_2011	0.258527	0.488798	0.235482
lcl|NC_012582.1_cds_WP_001173614.1_1133	0.308029	0.623465	0.280674
lcl|NC_012582.1_cds_WP_001173614.1_1194	0.308029	0.623465	0.280674
lcl|NC_012582.1_cds_WP_001173892.1_520	0.308745	0.65888	0.292241
lcl|NC_012582.1_cds_WP_001174034.1_1545	0.297598	0.525339	0.253763
lcl|NC_012582.1_cds_WP_001174444.1_2066	0.298777	0.590338	0.257991
lcl|NC_012582.1_cds_WP_001174901.1_156	0.321774	0.692352	0.293997
lcl|NC_012582.1_cds_WP_001176378.1_808	0.306575	0.571136	0.264257
lcl|NC_012582.1_cds_WP_001176628.1_1882	0.326904	0.772891	0.316418
lcl|NC_012582.1_cds_WP_001176739.1_186	0.326079	0.750328	0.299065
lcl|NC_012582.1_cds_WP_001177163.1_2538	0.295162	0.535495	0.266142
lcl|NC_012582.1_cds_WP_001177221.1_455	0.280989	0.525254	0.226373
lcl|NC_012582.1_cds_WP_001177585.1_1305	0.286252	0.556665	0.261672
lcl|NC_012582.1_cds_WP_001177847.1_1052	0.301779	0.499949	0.258803
lcl|NC_012582.1_cds_WP_001178408.1_2355	0.280575	0.498883	0.251569
lcl|NC_012582.1_cds_WP_001179458.1_2017	0.315375	0.612976	0.277933
lcl|NC_012582.1_cds_WP_001179676.1_1361	0.266976	0.451876	0.230555
lcl|NC_012582.1_cds_WP_001180252.1_1542	0.31666	0.566899	0.265046
lcl|NC_012582.1_cds_WP_001180565.1_2064	0.282433	0.495411	0.247235
lcl|NC_012582.1_cds_WP_001181007.1_2604	0.33833	0.797146	0.331265
lcl|NC_012582.1_cds_WP_001181145.1_953	0.272007	0.455045	0.234374
lcl|NC_012582.1_cds_WP_001181838.1_2140	0.266682	0.46206	0.239908
lcl|NC_012582.1_cds_WP_001181925.1_2067	0.284464	0.473487	0.256951
lcl|NC_012582.1_cds_WP_001182097.1_2225	0.314003	0.555247	0.270651
lcl|NC_012582.1_cds_WP_001183315.1_2307	0.268816	0.476286	0.237689
lcl|NC_012582.1_cds_WP_001183380.1_617	0.283517	0.555769	0.259056
lcl|NC_012582.1_cds_WP_001183680.1_1295	0.296759	0.550916	0.260154
lcl|NC_012582.1_cds_WP_001185226.1_1832	0.269934	0.468293	0.233585
lcl|NC_012582.1_cds_WP_001185437.1_1457	0.274374	0.556634	0.250513
lcl|NC_012582.1_cds_WP_001187322.1_2113	0.266997	0.516021	0.237993
lcl|NC_012582.1_cds_WP_001187692.1_1734	0.29711	0.51877	0.264982
lcl|NC_012582.1_cds_WP_001187861.1_2359	0.285651	0.483811	0.250713
lcl|NC_012582.1_cds_WP_001187994.1_2526	0.294489	0.504477	0.254012
lcl|NC_012582.1_cds_WP_001188316.1_426	0.290568	0.446569	0.247175
lcl|NC_012582.1_cds_WP_001188974.1_1365	0.282976	0.501418	0.242797
lcl|NC_012582.1_cds_WP_001189751.1_1606	0.284599	0.572995	0.251088
lcl|NC_012582.1_cds_WP_001189766.1_35	0.264942	0.447347	0.218377
lcl|NC_012582.1_cds_WP_001189984.1_451	0.272265	0.46129	0.231639
lcl|NC_012582.1_cds_WP_001190200.1_146	0.299307	0.514853	0.2678
lcl|NC_012582.1_cds_WP_001190428.1_2076	0.300136	0.528538	0.270607
lcl|NC_012582.1_cds_WP_001190450.1_1281	0.290834	0.532039	0.256149
lcl|NC_012582.1_cds_WP_001190518.1_767	0.295066	0.633463	0.267691
lcl|NC_012582.1_cds_WP_001190972.1_244	0.290831	0.549954	0.258952
lcl|NC_012582.1_cds_WP_001190986.1_2174	0.306672	0.521757	0.27503
lcl|NC_012582.1_cds_WP_001191541.1_1642	0.287509	0.502899	0.257657
lcl|NC_012582.1_cds_WP_001191584.1_1051	0.28354	0.470252	0.238905
lcl|NC_012582.1_cds_WP_001192102.1_1101	0.297794	0.620671	0.262114
lcl|NC_012582.1_cds_WP_001192102.1_1226	0.297794	0.620671	0.262114
lcl|NC_012582.1_cds_WP_001193364.1_1239	0.315878	0.595413	0.275992
lcl|NC_012582.1_cds_WP_001194133.1_1879	0.290876	0.506895	0.261031
lcl|NC_012582.1_cds_WP_001194426.1_2383	0.346367	0.686003	0.307256
lcl|NC_012582.1_cds_WP_001194704.1_1147	0.307798	0.577683	0.273722
lcl|NC_012582.1_cds_WP_001195150.1_1328	0.298877	0.530568	0.260116
lcl|NC_012582.1_cds_WP_001195187.1_106	0.301569	0.573786	0.258786
lcl|NC_012582.1_cds_WP_001195536.1_1118	0.314774	0.58664	0.28279
lcl|NC_012582.1_cds_WP_001195536.1_1209	0.314774	0.58664	0.28279
lcl|NC_012582.1_cds_WP_001195750.1_587	0.317702	0.574258	0.283638
lcl|NC_012582.1_cds_WP_001196054.1_402	0.307792	0.787318	0.304784
lcl|NC_012582.1_cds_WP_001196281.1_704	0.290124	0.535482	0.252654
lcl|NC_012582.1_cds_WP_001196560.1_736	0.303985	0.566974	0.267325
lcl|NC_012582.1_cds_WP_001197679.1_299	0.327793	0.683129	0.290698
lcl|NC_012582.1_cds_WP_001198120.1_723	0.304633	0.616021	0.259312
lcl|NC_012582.1_cds_WP_001198175.1_2019	0.303386	0.56113	0.273831
lcl|NC_012582.1_cds_WP_001198446.1_1968	0.349371	0.823662	0.334126
lcl|NC_012582.1_cds_WP_001198579.1_95	0.292421	0.542338	0.262223
lcl|NC_012582.1_cds_WP_001198755.1_1656	0.292755	0.489389	0.247192
lcl|NC_012582.1_cds_WP_001200164.1_159	0.319298	0.572549	0.279111
lcl|NC_012582.1_cds_WP_001200663.1_1709	0.286517	0.474964	0.244568
lcl|NC_012582.1_cds_WP_001200951.1_409	0.307327	0.51101	0.266337
lcl|NC_012582.1_cds_WP_001201234.1_1065	0.278685	0.578089	0.25548
lcl|NC_012582.1_cds_WP_001201881.1_2726	0.278158	0.494456	0.24569
lcl|NC_012582.1_cds_WP_001202659.1_326	0.284601	0.466085	0.245571
lcl|NC_012582.1_cds_WP_001204646.1_2409	0.264181	0.467772	0.239036
lcl|NC_012582.1_cds_WP_001205197.1_1246	0.293779	0.506232	0.255254
lcl|NC_012582.1_cds_WP_001205536.1_1288	0.27659	0.502816	0.235078
lcl|NC_012582.1_cds_WP_001207198.1_360	0.320925	0.741735	0.330284
lcl|NC_012582.1_cds_WP_001208550.1_2334	0.300436	0.604956	0.252558
lcl|NC_012582.1_cds_WP_001209531.1_988	0.280331	0.478768	0.25481
lcl|NC_012582.1_cds_WP_001210057.1_2267	0.255338	0.412983	0.197303
lcl|NC_012582.1_cds_WP_001211040.1_1272	0.290353	0.519423	0.250676
lcl|NC_012582.1_cds_WP_001211065.1_1801	0.26402	0.436707	0.240623
lcl|NC_012582.1_cds_WP_001211761.1_876	0.284175	0.451653	0.243869
lcl|NC_012582.1_cds_WP_001211977.1_1280	0.272512	0.570766	0.242003
lcl|NC_012582.1_cds_WP_001212589.1_2194	0.2845	0.551576	0.249569
lcl|NC_012582.1_cds_WP_001212849.1_202	0.306379	0.617712	0.27214
lcl|NC_012582.1_cds_WP_001214481.1_511	0.277366	0.509847	0.246463
lcl|NC_012582.1_cds_WP_001214790.1_1643	0.27937	0.480778	0.233949
lcl|NC_012582.1_cds_WP_001214990.1_2175	0.318927	0.598722	0.274557
lcl|NC_012582.1_cds_WP_001215226.1_2012	0.295288	0.547382	0.269578
lcl|NC_012582.1_cds_WP_001215918.1_2493	0.294623	0.56093	0.250437
lcl|NC_012582.1_cds_WP_001216360.1_2577	0.328289	0.698736	0.322202
lcl|NC_012582.1_cds_WP_001216668.1_399	0.351584	0.839094	0.347149
lcl|NC_012582.1_cds_WP_001216995.1_967	0.282246	0.48212	0.238017
lcl|NC_012582.1_cds_WP_001217214.1_1243	0.278751	0.491164	0.236033
lcl|NC_012582.1_cds_WP_001217307.1_1667	0.288785	0.401078	0.222857
lcl|NC_012582.1_cds_WP_001218332.1_1127	0.315925	0.645434	0.287044
lcl|NC_012582.1_cds_WP_001218332.1_1200	0.315925	0.645434	0.287044
lcl|NC_012582.1_cds_WP_001220122.1_522	0.29426	0.559948	0.256203
lcl|NC_012582.1_cds_WP_001220222.1_956	0.328368	0.705798	0.290777
lcl|NC_012582.1_cds_WP_001221396.1_950	0.259977	0.414404	0.235896
lcl|NC_012582.1_cds_WP_001221777.1_848	0.314471	0.633724	0.275866
lcl|NC_012582.1_cds_WP_001221804.1_1948	0.269682	0.532392	0.247725
lcl|NC_012582.1_cds_WP_001222497.1_498	0.300342	0.582045	0.275561
lcl|NC_012582.1_cds_WP_001222684.1_2713	0.30492	0.529255	0.261517
lcl|NC_012582.1_cds_WP_001223052.1_1654	0.264946	0.419783	0.234111
lcl|NC_012582.1_cds_WP_001223843.1_924	0.273404	0.483333	0.248811
lcl|NC_012582.1_cds_WP_001225051.1_2223	0.298135	0.576677	0.266782
lcl|NC_012582.1_cds_WP_001226513.1_2738	0.27644	0.464207	0.251199
lcl|NC_012582.1_cds_WP_001227124.1_432	0.266894	0.474939	0.226898
lcl|NC_012582.1_cds_WP_001228179.1_2160	0.253487	0.44628	0.230293
lcl|NC_012582.1_cds_WP_001228766.1_384	0.322039	0.656256	0.283968
lcl|NC_012582.1_cds_WP_001229026.1_2280	0.283951	0.505589	0.257203
lcl|NC_012582.1_cds_WP_001229260.1_1285	0.271126	0.49655	0.211552
lcl|NC_012582.1_cds_WP_001229324.1_1591	0.28612	0.501545	0.251199
lcl|NC_012582.1_cds_WP_001229555.1_1086	0.2733	0.406347	0.246269
lcl|NC_012582.1_cds_WP_001229623.1_123	0.276403	0.499789	0.246159
lcl|NC_012582.1_cds_WP_001230171.1_479	0.29091	0.529968	0.261104
lcl|NC_012582.1_cds_WP_001232136.1_803	0.284841	0.422636	0.240911
lcl|NC_012582.1_cds_WP_001232266.1_2329	0.347076	0.752128	0.306822
lcl|NC_012582.1_cds_WP_001232643.1_1169	0.324257	0.594529	0.287792
lcl|NC_012582.1_cds_WP_001233674.1_486	0.304437	0.602334	0.26786
lcl|NC_012582.1_cds_WP_001234007.1_809	0.279231	0.446811	0.229836
lcl|NC_012582.1_cds_WP_001234232.1_1088	0.289153	0.467166	0.221985
lcl|NC_012582.1_cds_WP_001234824.1_2171	0.334889	0.559984	0.294386
lcl|NC_012582.1_cds_WP_001234866.1_1691	0.304037	0.574766	0.253341
lcl|NC_012582.1_cds_WP_001235061.1_701	0.308329	0.57225	0.271243
[truncated: 752 more rows]
