# Supplementary material for: gtAI: an improved species-specific tRNA adaptation index using the genetic algorithm
Source: Front Mol Biosci. 2023 Jul 4;10:1218518. doi: 10.3389/fmolb.2023.1218518 (PMC10352787; doi:10.3389/fmolb.2023.1218518)
Supplement: Supplementary file 4 [file Table4.XLSX]

## Sheet: Aspergillus nidulans
Table S4: The gtAI, stAI, original tAI, and CAI values for the four eukaryotic (fungal) organisms used in the study.
gene id	gtAI	CAI	StAI	tAI
lcl|BN001301.1_cds_1142	0.332842	0.409477	0.211596	0.34123
lcl|BN001301.1_cds_1242	0.382704	0.470288	0.223123	0.384769
lcl|BN001301.1_cds_1253	0.361384	0.456064	0.242198	0.359806
lcl|BN001301.1_cds_418	0.365156	0.468938	0.202952	0.371904
lcl|BN001301.1_cds_592	0.356334	0.399725	0.16245	0.372927
lcl|BN001301.1_cds_750	0.323975	0.378957	0.228086	0.329953
lcl|BN001301.1_cds_CBF69357.1_1	0.34988	0.403747	0.21861	0.363059
lcl|BN001301.1_cds_CBF69359.1_2	0.360466	0.497737	0.211777	0.376596
lcl|BN001301.1_cds_CBF69360.1_3	0.352132	0.412946	0.195259	0.365508
lcl|BN001301.1_cds_CBF69362.1_4	0.380285	0.48959	0.223386	0.385606
lcl|BN001301.1_cds_CBF69364.1_5	0.373148	0.473235	0.201487	0.379727
lcl|BN001301.1_cds_CBF69366.1_6	0.338758	0.398108	0.191927	0.352168
lcl|BN001301.1_cds_CBF69368.1_7	0.345443	0.412265	0.221459	0.356545
lcl|BN001301.1_cds_CBF69369.1_8	0.372149	0.483361	0.230067	0.374004
lcl|BN001301.1_cds_CBF69371.1_9	0.331111	0.370629	0.223824	0.346078
lcl|BN001301.1_cds_CBF69373.1_10	0.36031	0.450861	0.237503	0.360359
lcl|BN001301.1_cds_CBF69375.1_11	0.338445	0.41865	0.243469	0.346193
lcl|BN001301.1_cds_CBF69377.1_12	0.359976	0.413728	0.193881	0.381926
lcl|BN001301.1_cds_CBF69379.1_13	0.354862	0.423193	0.205124	0.362813
lcl|BN001301.1_cds_CBF69381.1_14	0.307209	0.32209	0.190956	0.330089
lcl|BN001301.1_cds_CBF69383.1_15	0.401871	0.557809	0.166582	0.415841
lcl|BN001301.1_cds_CBF69385.1_16	0.340876	0.392413	0.210788	0.350855
lcl|BN001301.1_cds_CBF69387.1_17	0.363112	0.41314	0.216015	0.38139
lcl|BN001301.1_cds_CBF69388.1_18	0.303548	0.30795	0.16162	0.327609
lcl|BN001301.1_cds_CBF69390.1_19	0.344813	0.402399	0.136346	0.369833
lcl|BN001301.1_cds_CBF69392.1_20	0.372756	0.472649	0.203487	0.380811
lcl|BN001301.1_cds_CBF69394.1_21	0.347571	0.443505	0.209154	0.362737
lcl|BN001301.1_cds_CBF69396.1_22	0.382699	0.489501	0.195724	0.391958
lcl|BN001301.1_cds_CBF69397.1_23	0.397373	0.546813	0.245925	0.396934
lcl|BN001301.1_cds_CBF69399.1_24	0.356733	0.393828	0.200306	0.363338
lcl|BN001301.1_cds_CBF69401.1_25	0.31994	0.390637	0.182737	0.339238
lcl|BN001301.1_cds_CBF69403.1_26	0.348772	0.423489	0.21241	0.352929
lcl|BN001301.1_cds_CBF69405.1_27	0.354769	0.442212	0.219652	0.362932
lcl|BN001301.1_cds_CBF69407.1_28	0.360311	0.445938	0.223445	0.364344
lcl|BN001301.1_cds_CBF69408.1_29	0.345239	0.414476	0.209805	0.356203
lcl|BN001301.1_cds_CBF69410.1_30	0.365842	0.465434	0.240949	0.368082
lcl|BN001301.1_cds_CBF69412.1_31	0.357243	0.448022	0.206496	0.365409
lcl|BN001301.1_cds_CBF69414.1_32	0.351825	0.432877	0.207762	0.35433
lcl|BN001301.1_cds_CBF69416.1_33	0.374959	0.457256	0.195558	0.393216
lcl|BN001301.1_cds_CBF69418.1_34	0.30387	0.370672	0.195147	0.322693
lcl|BN001301.1_cds_CBF69419.1_35	0.367245	0.388861	0.223626	0.377906
lcl|BN001301.1_cds_CBF69421.1_36	0.358268	0.409302	0.201584	0.370201
lcl|BN001301.1_cds_CBF69423.1_37	0.499583	0.866808	0.242435	0.473495
lcl|BN001301.1_cds_CBF69425.1_38	0.371392	0.470902	0.249618	0.374876
lcl|BN001301.1_cds_CBF69427.1_39	0.370484	0.466149	0.242535	0.373281
lcl|BN001301.1_cds_CBF69429.1_40	0.374424	0.488849	0.228873	0.376723
lcl|BN001301.1_cds_CBF69431.1_41	0.362864	0.456129	0.209236	0.368398
lcl|BN001301.1_cds_CBF69432.1_42	0.353552	0.424711	0.190091	0.358862
lcl|BN001301.1_cds_CBF69434.1_43	0.393758	0.506091	0.252954	0.395756
lcl|BN001301.1_cds_CBF69436.1_44	0.45979	0.685477	0.229718	0.455087
lcl|BN001301.1_cds_CBF69438.1_45	0.401693	0.559568	0.224276	0.399837
lcl|BN001301.1_cds_CBF69440.1_46	0.385205	0.503455	0.204304	0.389879
lcl|BN001301.1_cds_CBF69441.1_47	0.385212	0.497922	0.238483	0.387474
lcl|BN001301.1_cds_CBF69443.1_48	0.379442	0.513547	0.241477	0.376692
lcl|BN001301.1_cds_CBF69445.1_49	0.375458	0.479059	0.245962	0.370332
lcl|BN001301.1_cds_CBF69447.1_50	0.4217	0.576808	0.273521	0.407418
lcl|BN001301.1_cds_CBF69449.1_51	0.388871	0.506392	0.256131	0.386294
lcl|BN001301.1_cds_CBF69451.1_52	0.365535	0.454013	0.210167	0.373311
lcl|BN001301.1_cds_CBF69453.1_53	0.389677	0.487465	0.223085	0.394232
lcl|BN001301.1_cds_CBF69454.1_54	0.341854	0.36778	0.224055	0.350008
lcl|BN001301.1_cds_CBF69456.1_55	0.37191	0.477792	0.20987	0.376815
lcl|BN001301.1_cds_CBF69458.1_56	0.386024	0.490191	0.23938	0.385495
lcl|BN001301.1_cds_CBF69459.1_57	0.380761	0.490733	0.23049	0.380514
lcl|BN001301.1_cds_CBF69461.1_58	0.394986	0.513596	0.248768	0.390119
lcl|BN001301.1_cds_CBF69463.1_59	0.395173	0.533645	0.23336	0.39631
lcl|BN001301.1_cds_CBF69465.1_60	0.319019	0.375012	0.194099	0.338806
lcl|BN001301.1_cds_CBF69467.1_61	0.405238	0.519369	0.201528	0.406443
lcl|BN001301.1_cds_CBF69468.1_62	0.338656	0.397674	0.215021	0.345372
lcl|BN001301.1_cds_CBF69470.1_63	0.362421	0.425196	0.229649	0.366937
lcl|BN001301.1_cds_CBF69472.1_64	0.392155	0.522313	0.23974	0.396264
lcl|BN001301.1_cds_CBF69473.1_65	0.358769	0.451944	0.25573	0.357866
lcl|BN001301.1_cds_CBF69475.1_66	0.382013	0.54268	0.305716	0.370094
lcl|BN001301.1_cds_CBF69477.1_67	0.415705	0.571459	0.321057	0.404211
lcl|BN001301.1_cds_CBF69479.1_68	0.381913	0.507491	0.240522	0.385196
lcl|BN001301.1_cds_CBF69480.1_69	0.406152	0.546715	0.242218	0.400602
lcl|BN001301.1_cds_CBF69482.1_70	0.407888	0.549925	0.254671	0.403587
lcl|BN001301.1_cds_CBF69484.1_71	0.332341	0.404997	0.215579	0.34408
lcl|BN001301.1_cds_CBF69485.1_72	0.391575	0.500706	0.227546	0.393166
lcl|BN001301.1_cds_CBF69487.1_73	0.359288	0.43697	0.23747	0.363728
lcl|BN001301.1_cds_CBF69489.1_74	0.342278	0.419018	0.221794	0.349397
lcl|BN001301.1_cds_CBF69490.1_75	0.367408	0.463376	0.246162	0.36316
lcl|BN001301.1_cds_CBF69492.1_76	0.436903	0.59132	0.21195	0.436151
lcl|BN001301.1_cds_CBF69494.1_77	0.404877	0.548946	0.260062	0.409512
lcl|BN001301.1_cds_CBF69496.1_78	0.4521	0.650956	0.244677	0.447328
lcl|BN001301.1_cds_CBF69497.1_79	0.347315	0.427566	0.214764	0.366249
lcl|BN001301.1_cds_CBF69499.1_80	0.349566	0.408046	0.283651	0.35106
lcl|BN001301.1_cds_CBF69500.1_81	0.388042	0.485795	0.221589	0.398562
lcl|BN001301.1_cds_CBF69502.1_82	0.419973	0.561567	0.243343	0.418299
lcl|BN001301.1_cds_CBF69504.1_83	0.383941	0.512163	0.23918	0.38197
lcl|BN001301.1_cds_CBF69506.1_84	0.353868	0.455044	0.212712	0.365582
lcl|BN001301.1_cds_CBF69507.1_85	0.397283	0.497936	0.226562	0.412697
lcl|BN001301.1_cds_CBF69509.1_86	0.377369	0.494523	0.264474	0.373159
lcl|BN001301.1_cds_CBF69511.1_87	0.364142	0.46222	0.236607	0.368567
lcl|BN001301.1_cds_CBF69513.1_88	0.365519	0.450988	0.210143	0.372201
lcl|BN001301.1_cds_CBF69515.1_89	0.364612	0.444929	0.249237	0.368834
lcl|BN001301.1_cds_CBF69517.1_90	0.338144	0.415518	0.22695	0.34565
lcl|BN001301.1_cds_CBF69518.1_91	0.350566	0.421999	0.233881	0.359452
lcl|BN001301.1_cds_CBF69520.1_92	0.363433	0.473368	0.227633	0.366466
lcl|BN001301.1_cds_CBF69522.1_93	0.385895	0.491589	0.239684	0.384377
lcl|BN001301.1_cds_CBF69524.1_94	0.375583	0.479411	0.257406	0.373215
lcl|BN001301.1_cds_CBF69525.1_95	0.349181	0.443904	0.220694	0.363009
lcl|BN001301.1_cds_CBF69527.1_96	0.359956	0.46108	0.207843	0.371836
lcl|BN001301.1_cds_CBF69529.1_97	0.421853	0.562896	0.245193	0.428374
lcl|BN001301.1_cds_CBF69531.1_98	0.347863	0.427769	0.247807	0.355014
lcl|BN001301.1_cds_CBF69533.1_99	0.314183	0.370743	0.296962	0.312359
lcl|BN001301.1_cds_CBF69534.1_100	0.350178	0.441993	0.22815	0.354802
lcl|BN001301.1_cds_CBF69536.1_101	0.325194	0.388097	0.199515	0.336124
lcl|BN001301.1_cds_CBF69538.1_102	0.407517	0.518684	0.234016	0.413583
lcl|BN001301.1_cds_CBF69540.1_103	0.349774	0.42386	0.22834	0.358672
lcl|BN001301.1_cds_CBF69542.1_104	0.439433	0.639524	0.183849	0.443505
lcl|BN001301.1_cds_CBF69544.1_105	0.331237	0.405434	0.215415	0.338074
lcl|BN001301.1_cds_CBF69546.1_106	0.379621	0.467698	0.238828	0.384342
lcl|BN001301.1_cds_CBF69548.1_107	0.392939	0.503756	0.26064	0.392212
lcl|BN001301.1_cds_CBF69550.1_108	0.364418	0.452628	0.219988	0.371981
lcl|BN001301.1_cds_CBF69552.1_109	0.350389	0.437946	0.217908	0.356211
lcl|BN001301.1_cds_CBF69554.1_110	0.392269	0.527141	0.245476	0.394078
lcl|BN001301.1_cds_CBF69555.1_111	0.425558	0.571088	0.241484	0.424593
lcl|BN001301.1_cds_CBF69557.1_112	0.379852	0.444524	0.211942	0.386619
lcl|BN001301.1_cds_CBF69558.1_113	0.341562	0.41275	0.225469	0.351388
lcl|BN001301.1_cds_CBF69560.1_114	0.386811	0.53299	0.219081	0.39587
lcl|BN001301.1_cds_CBF69562.1_115	0.437325	0.591422	0.223642	0.434867
lcl|BN001301.1_cds_CBF69564.1_116	0.393448	0.500016	0.233699	0.394049
lcl|BN001301.1_cds_CBF69565.1_117	0.359355	0.444973	0.216762	0.370147
lcl|BN001301.1_cds_CBF69567.1_118	0.350632	0.420794	0.233374	0.35356
lcl|BN001301.1_cds_CBF69569.1_119	0.368069	0.463698	0.217308	0.380819
lcl|BN001301.1_cds_CBF69571.1_120	0.345192	0.42507	0.178172	0.359991
lcl|BN001301.1_cds_CBF69573.1_121	0.342388	0.395154	0.183424	0.366593
lcl|BN001301.1_cds_CBF69575.1_122	0.362868	0.458437	0.201859	0.372967
lcl|BN001301.1_cds_CBF69576.1_123	0.37033	0.458664	0.218887	0.377854
lcl|BN001301.1_cds_CBF69578.1_124	0.333137	0.372137	0.164835	0.354528
lcl|BN001301.1_cds_CBF69580.1_125	0.36389	0.480662	0.242554	0.359535
lcl|BN001301.1_cds_CBF69582.1_126	0.391206	0.497767	0.23248	0.396366
lcl|BN001301.1_cds_CBF69583.1_127	0.371268	0.449226	0.237177	0.381792
lcl|BN001301.1_cds_CBF69585.1_128	0.398104	0.505952	0.211368	0.406932
lcl|BN001301.1_cds_CBF69587.1_129	0.358575	0.469076	0.239835	0.356591
lcl|BN001301.1_cds_CBF69589.1_130	0.371569	0.489882	0.258938	0.37012
lcl|BN001301.1_cds_CBF69591.1_131	0.347356	0.446186	0.227549	0.345815
lcl|BN001301.1_cds_CBF69592.1_132	0.32105	0.380559	0.211977	0.325158
lcl|BN001301.1_cds_CBF69594.1_133	0.331007	0.401001	0.211915	0.339798
lcl|BN001301.1_cds_CBF69596.1_134	0.433907	0.548844	0.268307	0.421835
lcl|BN001301.1_cds_CBF69598.1_135	0.34297	0.418503	0.227126	0.351557
lcl|BN001301.1_cds_CBF69600.1_136	0.395938	0.484348	0.231816	0.393192
lcl|BN001301.1_cds_CBF69602.1_137	0.35643	0.432296	0.211854	0.370982
lcl|BN001301.1_cds_CBF69604.1_138	0.333601	0.403087	0.219671	0.343859
lcl|BN001301.1_cds_CBF69605.1_139	0.38751	0.49489	0.214902	0.398146
lcl|BN001301.1_cds_CBF69607.1_140	0.369863	0.473129	0.206451	0.376706
lcl|BN001301.1_cds_CBF69609.1_141	0.362696	0.455059	0.206353	0.371595
lcl|BN001301.1_cds_CBF69611.1_142	0.45707	0.614029	0.222735	0.456769
lcl|BN001301.1_cds_CBF69613.1_143	0.349277	0.421756	0.238024	0.355436
lcl|BN001301.1_cds_CBF69615.1_144	0.507789	0.733982	0.215844	0.491557
lcl|BN001301.1_cds_CBF69617.1_145	0.350032	0.437921	0.241913	0.358026
lcl|BN001301.1_cds_CBF69619.1_146	0.386772	0.464798	0.216077	0.395416
lcl|BN001301.1_cds_CBF69621.1_147	0.412814	0.512965	0.21804	0.418256
lcl|BN001301.1_cds_CBF69623.1_148	0.357188	0.45661	0.259464	0.365069
lcl|BN001301.1_cds_CBF69625.1_149	0.35728	0.430121	0.214201	0.369124
lcl|BN001301.1_cds_CBF69627.1_150	0.36216	0.445558	0.219093	0.371399
lcl|BN001301.1_cds_CBF69629.1_151	0.383328	0.508846	0.212077	0.389197
lcl|BN001301.1_cds_CBF69631.1_152	0.39473	0.496807	0.209576	0.392885
lcl|BN001301.1_cds_CBF69633.1_153	0.332673	0.383216	0.230489	0.335253
lcl|BN001301.1_cds_CBF69635.1_154	0.371842	0.46645	0.214225	0.377614
lcl|BN001301.1_cds_CBF69637.1_155	0.316297	0.368376	0.232055	0.32667
lcl|BN001301.1_cds_CBF69639.1_156	0.390972	0.509675	0.224158	0.401133
lcl|BN001301.1_cds_CBF69640.1_157	0.351214	0.431449	0.232098	0.355363
lcl|BN001301.1_cds_CBF69642.1_158	0.376181	0.481717	0.213348	0.386865
lcl|BN001301.1_cds_CBF69644.1_159	0.378284	0.477886	0.242052	0.384175
lcl|BN001301.1_cds_CBF69646.1_160	0.352078	0.42945	0.196238	0.375118
lcl|BN001301.1_cds_CBF69648.1_161	0.349238	0.416974	0.205663	0.357978
lcl|BN001301.1_cds_CBF69649.1_162	0.402966	0.53144	0.20145	0.403866
lcl|BN001301.1_cds_CBF69652.1_163	0.362457	0.451609	0.207695	0.367815
lcl|BN001301.1_cds_CBF69653.1_164	0.478857	0.686667	0.2361	0.464504
lcl|BN001301.1_cds_CBF69655.1_165	0.375976	0.461075	0.216612	0.375656
lcl|BN001301.1_cds_CBF69657.1_166	0.379219	0.488648	0.245403	0.379781
lcl|BN001301.1_cds_CBF69659.1_167	0.346127	0.418453	0.21733	0.352631
lcl|BN001301.1_cds_CBF69661.1_168	0.382941	0.474183	0.221475	0.384983
lcl|BN001301.1_cds_CBF69663.1_169	0.374202	0.447366	0.198462	0.390494
lcl|BN001301.1_cds_CBF69665.1_170	0.42007	0.57005	0.219422	0.417855
lcl|BN001301.1_cds_CBF69667.1_171	0.351402	0.426382	0.245283	0.355484
lcl|BN001301.1_cds_CBF69669.1_172	0.362059	0.447332	0.211976	0.37029
lcl|BN001301.1_cds_CBF69671.1_173	0.408442	0.530871	0.205535	0.412591
lcl|BN001301.1_cds_CBF69672.1_174	0.48283	0.669288	0.242111	0.469035
lcl|BN001301.1_cds_CBF69674.1_175	0.355779	0.429313	0.211117	0.360723
lcl|BN001301.1_cds_CBF69676.1_176	0.373812	0.461971	0.246461	0.375836
lcl|BN001301.1_cds_CBF69678.1_177	0.374108	0.479907	0.227975	0.379701
lcl|BN001301.1_cds_CBF69680.1_178	0.393995	0.488625	0.223974	0.404818
lcl|BN001301.1_cds_CBF69682.1_179	0.332036	0.403594	0.204707	0.344409
lcl|BN001301.1_cds_CBF69684.1_180	0.395072	0.478011	0.222388	0.397359
lcl|BN001301.1_cds_CBF69686.1_181	0.379259	0.47514	0.210454	0.392339
lcl|BN001301.1_cds_CBF69688.1_182	0.551474	0.818724	0.19225	0.536556
lcl|BN001301.1_cds_CBF69689.1_183	0.348735	0.417046	0.200194	0.35919
lcl|BN001301.1_cds_CBF69691.1_184	0.35468	0.449771	0.215939	0.36605
lcl|BN001301.1_cds_CBF69693.1_185	0.337082	0.434365	0.228212	0.334219
lcl|BN001301.1_cds_CBF69695.1_186	0.402545	0.53869	0.214513	0.408542
lcl|BN001301.1_cds_CBF69697.1_187	0.354615	0.41365	0.213642	0.361852
lcl|BN001301.1_cds_CBF69699.1_188	0.399598	0.521295	0.222733	0.408856
lcl|BN001301.1_cds_CBF69701.1_189	0.369803	0.451348	0.213895	0.380452
lcl|BN001301.1_cds_CBF69703.1_190	0.371782	0.439972	0.229427	0.374802
lcl|BN001301.1_cds_CBF69705.1_191	0.355617	0.442021	0.212198	0.363147
lcl|BN001301.1_cds_CBF69707.1_192	0.35151	0.411897	0.247422	0.358408
lcl|BN001301.1_cds_CBF69709.1_193	0.361712	0.444324	0.215788	0.373694
lcl|BN001301.1_cds_CBF69711.1_194	0.341408	0.417605	0.222403	0.348499
lcl|BN001301.1_cds_CBF69713.1_195	0.382567	0.490963	0.211799	0.390224
lcl|BN001301.1_cds_CBF69715.1_196	0.384548	0.487778	0.201317	0.394413
lcl|BN001301.1_cds_CBF69717.1_197	0.368829	0.44851	0.230233	0.373817
lcl|BN001301.1_cds_CBF69719.1_198	0.347141	0.393188	0.203184	0.359025
lcl|BN001301.1_cds_CBF69720.1_199	0.377615	0.464213	0.207329	0.384111
lcl|BN001301.1_cds_CBF69722.1_200	0.365991	0.495111	0.253758	0.378649
lcl|BN001301.1_cds_CBF69724.1_201	0.347555	0.413657	0.200606	0.356905
lcl|BN001301.1_cds_CBF69726.1_202	0.342909	0.395789	0.234025	0.350504
lcl|BN001301.1_cds_CBF69728.1_203	0.366238	0.430108	0.223702	0.379115
lcl|BN001301.1_cds_CBF69730.1_204	0.343569	0.40799	0.191361	0.355563
lcl|BN001301.1_cds_CBF69732.1_205	0.360013	0.434582	0.204696	0.369605
lcl|BN001301.1_cds_CBF69734.1_206	0.362705	0.446121	0.240143	0.366729
lcl|BN001301.1_cds_CBF69736.1_207	0.378874	0.444257	0.222127	0.39023
lcl|BN001301.1_cds_CBF69738.1_208	0.401546	0.541832	0.237063	0.402621
lcl|BN001301.1_cds_CBF69740.1_209	0.445857	0.620956	0.246727	0.430544
lcl|BN001301.1_cds_CBF69742.1_210	0.396992	0.550963	0.231592	0.400841
lcl|BN001301.1_cds_CBF69744.1_211	0.339076	0.402373	0.217758	0.349733
lcl|BN001301.1_cds_CBF69746.1_212	0.365395	0.4298	0.208474	0.380421
lcl|BN001301.1_cds_CBF69748.1_213	0.348857	0.419018	0.216525	0.359005
lcl|BN001301.1_cds_CBF69750.1_214	0.366132	0.426477	0.215182	0.378894
lcl|BN001301.1_cds_CBF69752.1_215	0.362163	0.420993	0.217403	0.366715
lcl|BN001301.1_cds_CBF69754.1_216	0.360217	0.434811	0.224743	0.362734
lcl|BN001301.1_cds_CBF69756.1_217	0.345575	0.41964	0.259082	0.342732
lcl|BN001301.1_cds_CBF69758.1_218	0.344358	0.422814	0.22322	0.353573
lcl|BN001301.1_cds_CBF69759.1_219	0.347807	0.407226	0.197233	0.358055
lcl|BN001301.1_cds_CBF69761.1_220	0.331559	0.398611	0.218068	0.347112
lcl|BN001301.1_cds_CBF69763.1_221	0.377196	0.432565	0.227247	0.385197
lcl|BN001301.1_cds_CBF69765.1_222	0.349562	0.428602	0.22643	0.363369
lcl|BN001301.1_cds_CBF69767.1_223	0.336569	0.402493	0.211282	0.348039
lcl|BN001301.1_cds_CBF69769.1_224	0.339749	0.401786	0.205196	0.348218
lcl|BN001301.1_cds_CBF69771.1_225	0.343625	0.41491	0.204572	0.349939
lcl|BN001301.1_cds_CBF69773.1_226	0.329962	0.388104	0.209614	0.338633
lcl|BN001301.1_cds_CBF69775.1_227	0.367935	0.481218	0.234378	0.379637
lcl|BN001301.1_cds_CBF69777.1_228	0.561002	0.809708	0.202439	0.523819
lcl|BN001301.1_cds_CBF69778.1_229	0.358928	0.452075	0.204929	0.377194
lcl|BN001301.1_cds_CBF69780.1_230	0.345693	0.427352	0.255319	0.351378
lcl|BN001301.1_cds_CBF69782.1_231	0.337071	0.406092	0.214647	0.341952
lcl|BN001301.1_cds_CBF69784.1_232	0.417795	0.549131	0.237174	0.402624
lcl|BN001301.1_cds_CBF69786.1_233	0.34912	0.403621	0.21259	0.356448
lcl|BN001301.1_cds_CBF69788.1_234	0.326423	0.391966	0.209967	0.334489
lcl|BN001301.1_cds_CBF69790.1_235	0.343529	0.398711	0.220276	0.352258
lcl|BN001301.1_cds_CBF69791.1_236	0.322463	0.398439	0.221625	0.331567
lcl|BN001301.1_cds_CBF69793.1_237	0.359694	0.461802	0.217177	0.36921
lcl|BN001301.1_cds_CBF69795.1_238	0.467357	0.645043	0.22351	0.460647
lcl|BN001301.1_cds_CBF69797.1_239	0.344283	0.424418	0.21053	0.351621
lcl|BN001301.1_cds_CBF69799.1_240	0.395381	0.513873	0.208423	0.398701
lcl|BN001301.1_cds_CBF69801.1_241	0.342787	0.430985	0.225225	0.363733
lcl|BN001301.1_cds_CBF69803.1_242	0.344941	0.42033	0.208312	0.35487
lcl|BN001301.1_cds_CBF69805.1_243	0.414581	0.536475	0.230584	0.418052
lcl|BN001301.1_cds_CBF69807.1_244	0.467358	0.62247	0.215075	0.447005
lcl|BN001301.1_cds_CBF69809.1_245	0.375652	0.465296	0.236488	0.37795
lcl|BN001301.1_cds_CBF69811.1_246	0.369877	0.454371	0.196506	0.380418
lcl|BN001301.1_cds_CBF69813.1_247	0.352938	0.458944	0.206949	0.358775
lcl|BN001301.1_cds_CBF69815.1_248	0.403125	0.499168	0.221268	0.406858
lcl|BN001301.1_cds_CBF69817.1_249	0.36167	0.41157	0.196167	0.370342
lcl|BN001301.1_cds_CBF69819.1_250	0.394824	0.50179	0.212036	0.403967
lcl|BN001301.1_cds_CBF69821.1_251	0.398811	0.508266	0.216816	0.401254
lcl|BN001301.1_cds_CBF69823.1_252	0.404005	0.502873	0.256323	0.402013
lcl|BN001301.1_cds_CBF69825.1_253	0.364329	0.432476	0.205549	0.37856
lcl|BN001301.1_cds_CBF69827.1_254	0.347077	0.420023	0.215284	0.353563
lcl|BN001301.1_cds_CBF69829.1_255	0.37446	0.468709	0.224456	0.374692
lcl|BN001301.1_cds_CBF69831.1_256	0.347903	0.421177	0.205483	0.358161
lcl|BN001301.1_cds_CBF69832.1_257	0.316453	0.376696	0.230866	0.320825
lcl|BN001301.1_cds_CBF69834.1_258	0.35373	0.404383	0.212883	0.368376
lcl|BN001301.1_cds_CBF69836.1_259	0.350184	0.425809	0.208884	0.352693
lcl|BN001301.1_cds_CBF69838.1_260	0.377355	0.48989	0.218128	0.376655
lcl|BN001301.1_cds_CBF69840.1_261	0.393155	0.501058	0.205631	0.394426
lcl|BN001301.1_cds_CBF69842.1_262	0.346031	0.412631	0.228125	0.35798
lcl|BN001301.1_cds_CBF69844.1_263	0.533748	0.708995	0.181743	0.507782
lcl|BN001301.1_cds_CBF69846.1_264	0.408022	0.606054	0.235628	0.40709
lcl|BN001301.1_cds_CBF69848.1_265	0.368317	0.474853	0.196238	0.379806
lcl|BN001301.1_cds_CBF69850.1_266	0.395994	0.502361	0.206482	0.403622
lcl|BN001301.1_cds_CBF69852.1_267	0.397304	0.506981	0.204685	0.406866
lcl|BN001301.1_cds_CBF69854.1_268	0.330669	0.364763	0.250806	0.335018
lcl|BN001301.1_cds_CBF69856.1_269	0.352564	0.434543	0.245336	0.360558
lcl|BN001301.1_cds_CBF69857.1_270	0.387078	0.523922	0.250321	0.380392
lcl|BN001301.1_cds_CBF69859.1_271	0.29758	0.329057	0.247554	0.304046
lcl|BN001301.1_cds_CBF69861.1_272	0.460238	0.604766	0.234535	0.455844
lcl|BN001301.1_cds_CBF69863.1_273	0.361653	0.46191	0.234629	0.36361
lcl|BN001301.1_cds_CBF69865.1_274	0.269002	0.293601	0.250583	0.268235
lcl|BN001301.1_cds_CBF69867.1_275	0.344568	0.428274	0.227763	0.353511
lcl|BN001301.1_cds_CBF69869.1_276	0.37424	0.446967	0.223468	0.375768
lcl|BN001301.1_cds_CBF69871.1_277	0.359469	0.36606	0.257047	0.358703
lcl|BN001301.1_cds_CBF69873.1_278	0.382053	0.495429	0.216522	0.386664
lcl|BN001301.1_cds_CBF69875.1_279	0.350035	0.410896	0.208925	0.355989
lcl|BN001301.1_cds_CBF69877.1_280	0.348114	0.430176	0.211392	0.358096
lcl|BN001301.1_cds_CBF69879.1_281	0.352292	0.405407	0.2587	0.359744
lcl|BN001301.1_cds_CBF69881.1_282	0.368782	0.462768	0.245496	0.370244
lcl|BN001301.1_cds_CBF69883.1_283	0.360817	0.45647	0.231024	0.361139
lcl|BN001301.1_cds_CBF69884.1_284	0.374746	0.462505	0.205733	0.380324
lcl|BN001301.1_cds_CBF69887.1_285	0.381323	0.470349	0.218679	0.383158
lcl|BN001301.1_cds_CBF69889.1_286	0.352653	0.431068	0.250156	0.353256
lcl|BN001301.1_cds_CBF69890.1_287	0.414935	0.584292	0.247968	0.409016
lcl|BN001301.1_cds_CBF69892.1_288	0.380311	0.455384	0.251728	0.387201
lcl|BN001301.1_cds_CBF69894.1_289	0.446519	0.608706	0.197273	0.444874
lcl|BN001301.1_cds_CBF69896.1_290	0.433419	0.578018	0.183342	0.440851
lcl|BN001301.1_cds_CBF69898.1_291	0.364149	0.468998	0.206773	0.372447
lcl|BN001301.1_cds_CBF69900.1_292	0.345357	0.387056	0.234039	0.350077
lcl|BN001301.1_cds_CBF69902.1_293	0.381889	0.467521	0.24416	0.386013
lcl|BN001301.1_cds_CBF69904.1_294	0.389058	0.494768	0.195511	0.397191
lcl|BN001301.1_cds_CBF69906.1_295	0.364976	0.455537	0.219644	0.374009
lcl|BN001301.1_cds_CBF69908.1_296	0.350981	0.429991	0.214546	0.35769
lcl|BN001301.1_cds_CBF69910.1_297	0.348302	0.442302	0.184833	0.36497
lcl|BN001301.1_cds_CBF69911.1_298	0.397578	0.487242	0.198533	0.407364
lcl|BN001301.1_cds_CBF69913.1_299	0.436913	0.58338	0.25276	0.432363
lcl|BN001301.1_cds_CBF69915.1_300	0.330758	0.377419	0.271805	0.326449
lcl|BN001301.1_cds_CBF69917.1_301	0.359046	0.433986	0.226111	0.366691
lcl|BN001301.1_cds_CBF69919.1_302	0.350413	0.42753	0.209394	0.36475
lcl|BN001301.1_cds_CBF69921.1_303	0.368502	0.458409	0.219288	0.371111
lcl|BN001301.1_cds_CBF69923.1_304	0.377722	0.505896	0.211671	0.385066
lcl|BN001301.1_cds_CBF69925.1_305	0.328598	0.401628	0.203997	0.342407
lcl|BN001301.1_cds_CBF69926.1_306	0.383159	0.54433	0.198829	0.392922
lcl|BN001301.1_cds_CBF69928.1_307	0.380789	0.498471	0.226524	0.383424
lcl|BN001301.1_cds_CBF69930.1_308	0.378658	0.475649	0.208256	0.381407
lcl|BN001301.1_cds_CBF69932.1_309	0.360613	0.4414	0.25956	0.35795
lcl|BN001301.1_cds_CBF69934.1_310	0.357484	0.441238	0.233515	0.368304
lcl|BN001301.1_cds_CBF69936.1_311	0.36	0.443662	0.224166	0.36061
lcl|BN001301.1_cds_CBF69938.1_312	0.336058	0.40507	0.194076	0.349981
lcl|BN001301.1_cds_CBF69940.1_313	0.343765	0.393491	0.190464	0.351718
lcl|BN001301.1_cds_CBF69942.1_314	0.343389	0.409404	0.219865	0.349243
lcl|BN001301.1_cds_CBF69944.1_315	0.381596	0.479761	0.221619	0.387673
lcl|BN001301.1_cds_CBF69945.1_316	0.41858	0.521862	0.222902	0.424498
lcl|BN001301.1_cds_CBF69947.1_317	0.377509	0.458058	0.243016	0.385497
lcl|BN001301.1_cds_CBF69949.1_318	0.39011	0.556524	0.263289	0.38582
lcl|BN001301.1_cds_CBF69951.1_319	0.35636	0.443872	0.219963	0.36698
lcl|BN001301.1_cds_CBF69953.1_320	0.369752	0.465352	0.215215	0.374727
lcl|BN001301.1_cds_CBF69955.1_321	0.359589	0.432776	0.212528	0.36933
lcl|BN001301.1_cds_CBF69957.1_322	0.440683	0.601419	0.216337	0.439591
lcl|BN001301.1_cds_CBF69959.1_323	0.365786	0.476044	0.212317	0.370396
lcl|BN001301.1_cds_CBF69961.1_324	0.363605	0.448229	0.19565	0.373233
lcl|BN001301.1_cds_CBF69963.1_325	0.364253	0.457839	0.215724	0.375445
lcl|BN001301.1_cds_CBF69965.1_326	0.343824	0.416704	0.248371	0.342683
lcl|BN001301.1_cds_CBF69967.1_327	0.37899	0.458509	0.222349	0.381021
lcl|BN001301.1_cds_CBF69969.1_328	0.343559	0.430648	0.217807	0.35071
lcl|BN001301.1_cds_CBF69971.1_329	0.364619	0.466524	0.224041	0.377355
lcl|BN001301.1_cds_CBF69973.1_330	0.366188	0.427307	0.216182	0.371081
lcl|BN001301.1_cds_CBF69975.1_331	0.559635	0.828098	0.220047	0.539915
lcl|BN001301.1_cds_CBF69977.1_332	0.362126	0.362848	0.218605	0.353059
lcl|BN001301.1_cds_CBF69979.1_333	0.364229	0.473691	0.213264	0.365604
lcl|BN001301.1_cds_CBF69981.1_334	0.398327	0.523172	0.198865	0.384377
lcl|BN001301.1_cds_CBF69983.1_335	0.399341	0.504148	0.212677	0.40181
lcl|BN001301.1_cds_CBF69985.1_336	0.342512	0.40084	0.253663	0.351473
lcl|BN001301.1_cds_CBF69987.1_337	0.329865	0.41972	0.206156	0.344409
lcl|BN001301.1_cds_CBF69989.1_338	0.312829	0.368207	0.204867	0.324561
lcl|BN001301.1_cds_CBF69991.1_339	0.356981	0.441318	0.231959	0.357933
lcl|BN001301.1_cds_CBF69992.1_340	0.37301	0.492923	0.199744	0.37747
lcl|BN001301.1_cds_CBF69994.1_341	0.363899	0.453129	0.220066	0.370714
lcl|BN001301.1_cds_CBF69996.1_342	0.38036	0.470708	0.194941	0.396247
lcl|BN001301.1_cds_CBF69998.1_343	0.395358	0.490625	0.21348	0.403253
lcl|BN001301.1_cds_CBF70000.1_344	0.348603	0.427535	0.22459	0.353249
lcl|BN001301.1_cds_CBF70002.1_345	0.379343	0.50046	0.228267	0.379798
lcl|BN001301.1_cds_CBF70004.1_346	0.360091	0.45197	0.219597	0.364096
lcl|BN001301.1_cds_CBF70006.1_347	0.370438	0.414626	0.214887	0.386072
lcl|BN001301.1_cds_CBF70008.1_348	0.413693	0.527818	0.2311	0.412476
lcl|BN001301.1_cds_CBF70010.1_349	0.355913	0.433223	0.225973	0.353879
lcl|BN001301.1_cds_CBF70012.1_350	0.377078	0.462609	0.211372	0.382683
lcl|BN001301.1_cds_CBF70014.1_351	0.352905	0.441722	0.192714	0.358837
lcl|BN001301.1_cds_CBF70016.1_352	0.417722	0.521597	0.221268	0.413517
lcl|BN001301.1_cds_CBF70018.1_353	0.358852	0.433781	0.211927	0.36341
lcl|BN001301.1_cds_CBF70019.1_354	0.344134	0.426633	0.215759	0.35249
lcl|BN001301.1_cds_CBF70021.1_355	0.399605	0.527163	0.232175	0.399867
lcl|BN001301.1_cds_CBF70023.1_356	0.549453	0.867191	0.262159	0.536927
lcl|BN001301.1_cds_CBF70025.1_357	0.347247	0.413829	0.21901	0.35452
lcl|BN001301.1_cds_CBF70027.1_358	0.476393	0.592779	0.248381	0.463917
lcl|BN001301.1_cds_CBF70029.1_359	0.335651	0.387185	0.217802	0.340833
lcl|BN001301.1_cds_CBF70031.1_360	0.394505	0.473552	0.240803	0.395911
lcl|BN001301.1_cds_CBF70033.1_361	0.411027	0.473733	0.260648	0.405455
lcl|BN001301.1_cds_CBF70035.1_362	0.355761	0.413324	0.243066	0.364214
lcl|BN001301.1_cds_CBF70037.1_363	0.318969	0.382705	0.201376	0.330819
lcl|BN001301.1_cds_CBF70039.1_364	0.365696	0.449428	0.220176	0.369432
lcl|BN001301.1_cds_CBF70041.1_365	0.360713	0.462831	0.203186	0.362611
lcl|BN001301.1_cds_CBF70043.1_366	0.369132	0.459995	0.26266	0.368969
lcl|BN001301.1_cds_CBF70045.1_367	0.37471	0.470523	0.23326	0.391954
lcl|BN001301.1_cds_CBF70047.1_368	0.38896	0.485234	0.221319	0.391555
lcl|BN001301.1_cds_CBF70049.1_369	0.422591	0.579693	0.206903	0.424973
lcl|BN001301.1_cds_CBF70051.1_370	0.388444	0.485105	0.230404	0.387608
lcl|BN001301.1_cds_CBF70053.1_371	0.404042	0.513157	0.237398	0.404253
lcl|BN001301.1_cds_CBF70055.1_372	0.412598	0.517628	0.221758	0.419057
lcl|BN001301.1_cds_CBF70057.1_373	0.354507	0.425189	0.199909	0.366436
lcl|BN001301.1_cds_CBF70059.1_374	0.321265	0.369096	0.228736	0.320698
lcl|BN001301.1_cds_CBF70061.1_375	0.34908	0.460012	0.227092	0.355478
lcl|BN001301.1_cds_CBF70062.1_376	0.353808	0.41867	0.199447	0.361556
lcl|BN001301.1_cds_CBF70064.1_377	0.347459	0.426047	0.211947	0.358793
lcl|BN001301.1_cds_CBF70066.1_378	0.368354	0.464881	0.215506	0.371938
lcl|BN001301.1_cds_CBF70068.1_379	0.402597	0.516323	0.240725	0.401805
lcl|BN001301.1_cds_CBF70070.1_380	0.401792	0.526712	0.242281	0.398739
lcl|BN001301.1_cds_CBF70072.1_381	0.327445	0.366815	0.168987	0.347896
lcl|BN001301.1_cds_CBF70074.1_382	0.355701	0.436415	0.204712	0.36424
lcl|BN001301.1_cds_CBF70076.1_383	0.349383	0.425732	0.223156	0.352656
lcl|BN001301.1_cds_CBF70078.1_384	0.342429	0.387745	0.190317	0.347364
lcl|BN001301.1_cds_CBF70080.1_385	0.359785	0.451454	0.207194	0.370266
lcl|BN001301.1_cds_CBF70082.1_386	0.364425	0.425273	0.202191	0.37604
lcl|BN001301.1_cds_CBF70084.1_387	0.37256	0.462829	0.207148	0.382815
lcl|BN001301.1_cds_CBF70085.1_388	0.38434	0.464303	0.224482	0.379491
lcl|BN001301.1_cds_CBF70087.1_389	0.356093	0.451725	0.19202	0.37007
lcl|BN001301.1_cds_CBF70089.1_390	0.342845	0.417381	0.220447	0.347181
lcl|BN001301.1_cds_CBF70091.1_391	0.378534	0.450135	0.269556	0.370775
lcl|BN001301.1_cds_CBF70093.1_392	0.382297	0.47073	0.23129	0.391508
lcl|BN001301.1_cds_CBF70094.1_393	0.359881	0.438725	0.220643	0.375935
lcl|BN001301.1_cds_CBF70096.1_394	0.361721	0.445439	0.20201	0.369022
lcl|BN001301.1_cds_CBF70098.1_395	0.357467	0.427839	0.201784	0.378511
lcl|BN001301.1_cds_CBF70100.1_396	0.340087	0.401909	0.212501	0.348354
lcl|BN001301.1_cds_CBF70101.1_397	0.330779	0.39874	0.210126	0.339843
lcl|BN001301.1_cds_CBF70103.1_398	0.398613	0.532037	0.233358	0.392015
lcl|BN001301.1_cds_CBF70105.1_399	0.331626	0.391961	0.204863	0.34908
lcl|BN001301.1_cds_CBF70107.1_400	0.368255	0.443989	0.200681	0.376275
lcl|BN001301.1_cds_CBF70108.1_401	0.363355	0.438125	0.186803	0.374487
lcl|BN001301.1_cds_CBF70110.1_402	0.340018	0.365967	0.270163	0.350695
lcl|BN001301.1_cds_CBF70112.1_403	0.356783	0.445179	0.183508	0.369225
lcl|BN001301.1_cds_CBF70114.1_404	0.349004	0.420732	0.200381	0.365674
lcl|BN001301.1_cds_CBF70116.1_405	0.373283	0.478537	0.198841	0.384805
lcl|BN001301.1_cds_CBF70118.1_406	0.383807	0.485811	0.234418	0.391471
lcl|BN001301.1_cds_CBF70120.1_407	0.346758	0.460679	0.218585	0.363626
lcl|BN001301.1_cds_CBF70122.1_408	0.386962	0.502046	0.257342	0.38776
lcl|BN001301.1_cds_CBF70124.1_409	0.36326	0.458202	0.219224	0.366992
lcl|BN001301.1_cds_CBF70126.1_410	0.374741	0.494621	0.27947	0.373919
lcl|BN001301.1_cds_CBF70128.1_411	0.39517	0.468944	0.228588	0.396583
lcl|BN001301.1_cds_CBF70130.1_412	0.389569	0.507362	0.238266	0.36616
lcl|BN001301.1_cds_CBF70132.1_413	0.474406	0.646868	0.20115	0.470793
lcl|BN001301.1_cds_CBF70134.1_414	0.353799	0.430082	0.205601	0.362305
lcl|BN001301.1_cds_CBF70136.1_415	0.341781	0.405877	0.206539	0.356983
lcl|BN001301.1_cds_CBF70138.1_416	0.336661	0.397985	0.229432	0.349638
lcl|BN001301.1_cds_CBF70139.1_417	0.373414	0.43297	0.250991	0.383806
lcl|BN001301.1_cds_CBF70143.1_419	0.37212	0.470103	0.202625	0.385097
lcl|BN001301.1_cds_CBF70145.1_420	0.346943	0.424496	0.217594	0.353478
lcl|BN001301.1_cds_CBF70147.1_421	0.364961	0.45645	0.202883	0.372111
lcl|BN001301.1_cds_CBF70149.1_422	0.437956	0.615238	0.221114	0.430823
lcl|BN001301.1_cds_CBF70151.1_423	0.335329	0.433176	0.23626	0.346656
lcl|BN001301.1_cds_CBF70153.1_424	0.394618	0.514046	0.23628	0.384594
lcl|BN001301.1_cds_CBF70155.1_425	0.375812	0.474465	0.215673	0.381388
lcl|BN001301.1_cds_CBF70157.1_426	0.370347	0.46336	0.245543	0.371576
lcl|BN001301.1_cds_CBF70159.1_427	0.374096	0.469163	0.233321	0.377016
lcl|BN001301.1_cds_CBF70161.1_428	0.387925	0.487906	0.21425	0.394968
lcl|BN001301.1_cds_CBF70162.1_429	0.395055	0.493353	0.213016	0.400673
lcl|BN001301.1_cds_CBF70164.1_430	0.386138	0.448867	0.237146	0.39186
lcl|BN001301.1_cds_CBF70166.1_431	0.412126	0.483972	0.263518	0.401355
lcl|BN001301.1_cds_CBF70168.1_432	0.352017	0.400145	0.204341	0.372787
lcl|BN001301.1_cds_CBF70170.1_433	0.37029	0.473005	0.213642	0.378401
lcl|BN001301.1_cds_CBF70172.1_434	0.447495	0.680253	0.222251	0.450638
lcl|BN001301.1_cds_CBF70173.1_435	0.362929	0.442167	0.211627	0.372722
lcl|BN001301.1_cds_CBF70175.1_436	0.322868	0.406241	0.228321	0.328693
lcl|BN001301.1_cds_CBF70177.1_437	0.380471	0.512984	0.255144	0.376802
lcl|BN001301.1_cds_CBF70179.1_438	0.403202	0.566732	0.247845	0.411057
lcl|BN001301.1_cds_CBF70180.1_439	0.342925	0.415987	0.221165	0.349727
lcl|BN001301.1_cds_CBF70181.1_440	0.358612	0.443821	0.245438	0.358639
lcl|BN001301.1_cds_CBF70183.1_441	0.340412	0.401995	0.211047	0.34846
lcl|BN001301.1_cds_CBF70185.1_442	0.361417	0.447483	0.238934	0.359131
lcl|BN001301.1_cds_CBF70187.1_443	0.360282	0.441353	0.22073	0.371988
lcl|BN001301.1_cds_CBF70189.1_444	0.375472	0.501643	0.237504	0.373199
lcl|BN001301.1_cds_CBF70190.1_445	0.369153	0.450561	0.227501	0.367264
lcl|BN001301.1_cds_CBF70192.1_446	0.415408	0.566113	0.249776	0.405858
lcl|BN001301.1_cds_CBF70194.1_447	0.435146	0.598797	0.241125	0.427543
lcl|BN001301.1_cds_CBF70196.1_448	0.345834	0.415834	0.21447	0.364565
lcl|BN001301.1_cds_CBF70198.1_449	0.389343	0.521051	0.250251	0.392116
lcl|BN001301.1_cds_CBF70200.1_450	0.392528	0.523792	0.232352	0.396278
lcl|BN001301.1_cds_CBF70202.1_451	0.33585	0.409928	0.220482	0.347499
lcl|BN001301.1_cds_CBF70204.1_452	0.36834	0.460649	0.213325	0.372465
lcl|BN001301.1_cds_CBF70206.1_453	0.543949	0.785544	0.233844	0.517836
lcl|BN001301.1_cds_CBF70208.1_454	0.571516	0.815887	0.194198	0.551798
lcl|BN001301.1_cds_CBF70209.1_455	0.34148	0.40472	0.213591	0.350836
lcl|BN001301.1_cds_CBF70211.1_456	0.352073	0.421949	0.21901	0.357725
lcl|BN001301.1_cds_CBF70213.1_457	0.330068	0.386014	0.207231	0.339448
lcl|BN001301.1_cds_CBF70215.1_458	0.36538	0.440912	0.234894	0.370737
lcl|BN001301.1_cds_CBF70217.1_459	0.375599	0.478228	0.211707	0.378413
lcl|BN001301.1_cds_CBF70219.1_460	0.47564	0.618768	0.241648	0.458621
lcl|BN001301.1_cds_CBF70221.1_461	0.543624	0.845481	0.226975	0.518568
lcl|BN001301.1_cds_CBF70223.1_462	0.53524	0.816201	0.22603	0.507109
lcl|BN001301.1_cds_CBF70224.1_463	0.384999	0.479681	0.223825	0.391053
lcl|BN001301.1_cds_CBF70226.1_464	0.418581	0.513669	0.215656	0.417762
lcl|BN001301.1_cds_CBF70228.1_465	0.38094	0.450144	0.23383	0.385187
lcl|BN001301.1_cds_CBF70230.1_466	0.356332	0.431257	0.218662	0.364194
lcl|BN001301.1_cds_CBF70232.1_467	0.351903	0.438915	0.216383	0.370341
lcl|BN001301.1_cds_CBF70234.1_468	0.448194	0.63139	0.258863	0.432505
lcl|BN001301.1_cds_CBF70236.1_469	0.360886	0.438779	0.20719	0.370351
lcl|BN001301.1_cds_CBF70237.1_470	0.351069	0.414136	0.224079	0.356485
lcl|BN001301.1_cds_CBF70239.1_471	0.379064	0.459042	0.230956	0.380995
lcl|BN001301.1_cds_CBF70241.1_472	0.406044	0.542219	0.212615	0.407603
lcl|BN001301.1_cds_CBF70243.1_473	0.387383	0.493442	0.262485	0.38946
lcl|BN001301.1_cds_CBF70245.1_474	0.366799	0.437804	0.211775	0.373298
lcl|BN001301.1_cds_CBF70247.1_475	0.401653	0.506783	0.19409	0.409162
lcl|BN001301.1_cds_CBF70249.1_476	0.384563	0.467888	0.214922	0.387902
lcl|BN001301.1_cds_CBF70251.1_477	0.340806	0.401533	0.212287	0.347049
lcl|BN001301.1_cds_CBF70253.1_478	0.491188	0.66092	0.198139	0.494826
lcl|BN001301.1_cds_CBF70255.1_479	0.363837	0.403912	0.208724	0.368959
lcl|BN001301.1_cds_CBF70257.1_480	0.331528	0.39201	0.194365	0.345553
lcl|BN001301.1_cds_CBF70259.1_481	0.380516	0.484752	0.23181	0.386715
lcl|BN001301.1_cds_CBF70261.1_482	0.34789	0.415199	0.208474	0.351696
lcl|BN001301.1_cds_CBF70263.1_483	0.344317	0.426534	0.211565	0.350266
lcl|BN001301.1_cds_CBF70265.1_484	0.349591	0.428408	0.199452	0.35897
lcl|BN001301.1_cds_CBF70267.1_485	0.425014	0.55659	0.20719	0.427691
lcl|BN001301.1_cds_CBF70269.1_486	0.395169	0.517394	0.221859	0.393321
lcl|BN001301.1_cds_CBF70271.1_487	0.348773	0.42428	0.240841	0.360604
lcl|BN001301.1_cds_CBF70273.1_488	0.384924	0.482919	0.228497	0.385018
lcl|BN001301.1_cds_CBF70275.1_489	0.357411	0.4222	0.207805	0.370529
lcl|BN001301.1_cds_CBF70277.1_490	0.368195	0.453678	0.205454	0.377043
lcl|BN001301.1_cds_CBF70279.1_491	0.388639	0.493447	0.225023	0.383062
lcl|BN001301.1_cds_CBF70280.1_492	0.415315	0.53491	0.203157	0.416133
lcl|BN001301.1_cds_CBF70282.1_493	0.349185	0.441461	0.216795	0.360177
lcl|BN001301.1_cds_CBF70284.1_494	0.363267	0.457542	0.233352	0.371888
lcl|BN001301.1_cds_CBF70286.1_495	0.339398	0.417757	0.22875	0.345657
lcl|BN001301.1_cds_CBF70288.1_496	0.356197	0.459107	0.217396	0.361661
lcl|BN001301.1_cds_CBF70290.1_497	0.413879	0.582536	0.248107	0.40905
lcl|BN001301.1_cds_CBF70292.1_498	0.371885	0.480491	0.241972	0.363204
lcl|BN001301.1_cds_CBF70294.1_499	0.355548	0.434308	0.232352	0.365636
lcl|BN001301.1_cds_CBF70296.1_500	0.330279	0.40908	0.197536	0.332402
lcl|BN001301.1_cds_CBF70298.1_501	0.370021	0.465397	0.24915	0.371481
lcl|BN001301.1_cds_CBF70300.1_502	0.372066	0.463829	0.228105	0.374862
lcl|BN001301.1_cds_CBF70301.1_503	0.334872	0.414009	0.201383	0.351601
lcl|BN001301.1_cds_CBF70303.1_504	0.36254	0.448156	0.218304	0.371622
lcl|BN001301.1_cds_CBF70305.1_505	0.355666	0.421421	0.233505	0.359595
lcl|BN001301.1_cds_CBF70307.1_506	0.362543	0.439683	0.25239	0.357076
lcl|BN001301.1_cds_CBF70309.1_507	0.3849	0.478467	0.225085	0.380222
lcl|BN001301.1_cds_CBF70311.1_508	0.352126	0.441051	0.228195	0.362005
lcl|BN001301.1_cds_CBF70313.1_509	0.491254	0.712781	0.234273	0.480031
lcl|BN001301.1_cds_CBF70315.1_510	0.389832	0.467246	0.224368	0.395709
lcl|BN001301.1_cds_CBF70317.1_511	0.408774	0.526641	0.242434	0.410768
lcl|BN001301.1_cds_CBF70319.1_512	0.356596	0.425338	0.243414	0.358518
lcl|BN001301.1_cds_CBF70320.1_513	0.403371	0.523012	0.203935	0.410485
lcl|BN001301.1_cds_CBF70322.1_514	0.382218	0.458777	0.25078	0.373656
lcl|BN001301.1_cds_CBF70324.1_515	0.489007	0.659801	0.194415	0.488425
lcl|BN001301.1_cds_CBF70326.1_516	0.334864	0.390333	0.222522	0.345383
lcl|BN001301.1_cds_CBF70328.1_517	0.354544	0.414121	0.202878	0.372827
lcl|BN001301.1_cds_CBF70330.1_518	0.349943	0.412709	0.243142	0.350775
lcl|BN001301.1_cds_CBF70332.1_519	0.360866	0.441149	0.202625	0.363839
lcl|BN001301.1_cds_CBF70334.1_520	0.369731	0.461004	0.245344	0.372823
lcl|BN001301.1_cds_CBF70336.1_521	0.386077	0.472832	0.238866	0.378233
lcl|BN001301.1_cds_CBF70338.1_522	0.415559	0.545811	0.270363	0.411667
lcl|BN001301.1_cds_CBF70340.1_523	0.361505	0.431944	0.226795	0.368925
lcl|BN001301.1_cds_CBF70342.1_524	0.397517	0.515524	0.239867	0.395404
lcl|BN001301.1_cds_CBF70344.1_525	0.34135	0.428869	0.227583	0.34846
lcl|BN001301.1_cds_CBF70346.1_526	0.34565	0.414344	0.248147	0.351422
lcl|BN001301.1_cds_CBF70348.1_527	0.394734	0.560315	0.235877	0.38426
lcl|BN001301.1_cds_CBF70350.1_528	0.336178	0.398646	0.233067	0.336776
lcl|BN001301.1_cds_CBF70352.1_529	0.37888	0.468084	0.22947	0.379307
lcl|BN001301.1_cds_CBF70354.1_530	0.397098	0.512026	0.194639	0.406231
lcl|BN001301.1_cds_CBF70356.1_531	0.419503	0.546105	0.223022	0.425492
lcl|BN001301.1_cds_CBF70358.1_532	0.356464	0.438191	0.221662	0.354896
lcl|BN001301.1_cds_CBF70360.1_533	0.335231	0.421233	0.207488	0.350804
lcl|BN001301.1_cds_CBF70362.1_534	0.443565	0.59062	0.216544	0.447049
lcl|BN001301.1_cds_CBF70364.1_535	0.351146	0.452265	0.232299	0.354607
lcl|BN001301.1_cds_CBF70366.1_536	0.386574	0.485244	0.243243	0.384321
lcl|BN001301.1_cds_CBF70368.1_537	0.337813	0.414347	0.209427	0.35614
lcl|BN001301.1_cds_CBF70370.1_538	0.55974	0.798593	0.192433	0.54325
lcl|BN001301.1_cds_CBF70372.1_539	0.341432	0.416564	0.187268	0.357249
lcl|BN001301.1_cds_CBF70374.1_540	0.36853	0.439966	0.223554	0.375171
lcl|BN001301.1_cds_CBF70375.1_541	0.418823	0.543986	0.215679	0.423346
lcl|BN001301.1_cds_CBF70377.1_542	0.397785	0.536117	0.247864	0.403239
lcl|BN001301.1_cds_CBF70379.1_543	0.482844	0.661263	0.211875	0.473041
lcl|BN001301.1_cds_CBF70381.1_544	0.371672	0.446116	0.21163	0.378034
lcl|BN001301.1_cds_CBF70383.1_545	0.377576	0.476496	0.243597	0.380204
lcl|BN001301.1_cds_CBF70385.1_546	0.365408	0.427047	0.230244	0.37302
lcl|BN001301.1_cds_CBF70387.1_547	0.373021	0.466948	0.211249	0.381559
lcl|BN001301.1_cds_CBF70389.1_548	0.48846	0.681988	0.193307	0.48339
lcl|BN001301.1_cds_CBF70391.1_549	0.353143	0.427633	0.216227	0.363311
lcl|BN001301.1_cds_CBF70393.1_550	0.484598	0.655563	0.229626	0.47038
lcl|BN001301.1_cds_CBF70395.1_551	0.605863	0.885507	0.200488	0.581611
lcl|BN001301.1_cds_CBF70397.1_552	0.369502	0.424372	0.226925	0.374495
lcl|BN001301.1_cds_CBF70399.1_553	0.371458	0.449322	0.226352	0.375666
lcl|BN001301.1_cds_CBF70401.1_554	0.374558	0.552959	0.21291	0.383028
lcl|BN001301.1_cds_CBF70403.1_555	0.431354	0.557416	0.22479	0.429338
lcl|BN001301.1_cds_CBF70405.1_556	0.341946	0.413366	0.210961	0.352334
lcl|BN001301.1_cds_CBF70407.1_557	0.416468	0.526277	0.203703	0.422119
lcl|BN001301.1_cds_CBF70409.1_558	0.399403	0.484335	0.228641	0.39715
lcl|BN001301.1_cds_CBF70410.1_559	0.365183	0.45709	0.205429	0.370827
lcl|BN001301.1_cds_CBF70412.1_560	0.39279	0.504147	0.223301	0.395455
lcl|BN001301.1_cds_CBF70414.1_561	0.398246	0.52087	0.259573	0.3932
lcl|BN001301.1_cds_CBF70416.1_562	0.444237	0.636665	0.266842	0.444314
lcl|BN001301.1_cds_CBF70418.1_563	0.447676	0.608959	0.2662	0.441046
lcl|BN001301.1_cds_CBF70420.1_564	0.33803	0.416638	0.257783	0.333561
lcl|BN001301.1_cds_CBF70422.1_565	0.379221	0.46175	0.202746	0.386745
lcl|BN001301.1_cds_CBF70424.1_566	0.381105	0.460968	0.190133	0.390464
lcl|BN001301.1_cds_CBF70426.1_567	0.345412	0.404565	0.21497	0.355195
lcl|BN001301.1_cds_CBF70428.1_568	0.583512	0.858127	0.231569	0.545686
lcl|BN001301.1_cds_CBF70430.1_569	0.370959	0.457131	0.221165	0.373463
lcl|BN001301.1_cds_CBF70432.1_570	0.384455	0.479234	0.220482	0.392098
lcl|BN001301.1_cds_CBF70434.1_571	0.428714	0.587418	0.21098	0.428562
lcl|BN001301.1_cds_CBF70435.1_572	0.312315	0.330776	0.155939	0.33587
lcl|BN001301.1_cds_CBF70437.1_573	0.494719	0.672698	0.215461	0.478909
lcl|BN001301.1_cds_CBF70439.1_574	0.352389	0.399307	0.219903	0.362163
lcl|BN001301.1_cds_CBF70441.1_575	0.36411	0.440579	0.219023	0.378358
lcl|BN001301.1_cds_CBF70443.1_576	0.385359	0.500289	0.191191	0.396232
lcl|BN001301.1_cds_CBF70445.1_577	0.38387	0.488737	0.195259	0.396634
lcl|BN001301.1_cds_CBF70447.1_578	0.431829	0.557283	0.223234	0.427392
lcl|BN001301.1_cds_CBF70449.1_579	0.387723	0.481912	0.192462	0.39908
lcl|BN001301.1_cds_CBF70451.1_580	0.492671	0.711643	0.184201	0.475402
lcl|BN001301.1_cds_CBF70453.1_581	0.369778	0.464382	0.212839	0.373304
lcl|BN001301.1_cds_CBF70455.1_582	0.344175	0.389976	0.202612	0.355671
lcl|BN001301.1_cds_CBF70457.1_583	0.391306	0.455531	0.251133	0.383247
lcl|BN001301.1_cds_CBF70459.1_584	0.390653	0.51802	0.197536	0.401189
lcl|BN001301.1_cds_CBF70461.1_585	0.327109	0.437815	0.22927	0.324413
lcl|BN001301.1_cds_CBF70462.1_586	0.319227	0.346536	0.235863	0.33814
lcl|BN001301.1_cds_CBF70464.1_587	0.354024	0.429298	0.232999	0.355743
lcl|BN001301.1_cds_CBF70466.1_588	0.375527	0.452319	0.258116	0.375291
lcl|BN001301.1_cds_CBF70468.1_589	0.440416	0.604575	0.237628	0.435416
lcl|BN001301.1_cds_CBF70470.1_590	0.428092	0.561155	0.24228	0.430829
lcl|BN001301.1_cds_CBF70472.1_591	0.545711	0.825223	0.241668	0.516767
lcl|BN001301.1_cds_CBF70475.1_593	0.349356	0.430998	0.181991	0.363491
lcl|BN001301.1_cds_CBF70476.1_594	0.337635	0.394608	0.205906	0.34906
lcl|BN001301.1_cds_CBF70478.1_595	0.571861	0.818796	0.169795	0.552667
lcl|BN001301.1_cds_CBF70480.1_596	0.346715	0.422444	0.212351	0.360556
lcl|BN001301.1_cds_CBF70482.1_597	0.343593	0.409375	0.212094	0.354268
lcl|BN001301.1_cds_CBF70484.1_598	0.353163	0.421332	0.235756	0.366635
lcl|BN001301.1_cds_CBF70486.1_599	0.444285	0.580186	0.228608	0.43672
lcl|BN001301.1_cds_CBF70488.1_600	0.339581	0.379877	0.169505	0.357946
lcl|BN001301.1_cds_CBF70490.1_601	0.351848	0.417831	0.204119	0.364877
lcl|BN001301.1_cds_CBF70491.1_602	0.313021	0.38175	0.219699	0.318246
lcl|BN001301.1_cds_CBF70493.1_603	0.488781	0.704681	0.239544	0.473137
lcl|BN001301.1_cds_CBF70495.1_604	0.332711	0.424815	0.215676	0.340429
lcl|BN001301.1_cds_CBF70497.1_605	0.374057	0.459674	0.208586	0.383263
lcl|BN001301.1_cds_CBF70499.1_606	0.370063	0.476407	0.249991	0.367431
lcl|BN001301.1_cds_CBF70501.1_607	0.374206	0.465552	0.241057	0.372564
lcl|BN001301.1_cds_CBF70503.1_608	0.351765	0.413048	0.247609	0.365713
lcl|BN001301.1_cds_CBF70504.1_609	0.344074	0.460234	0.224428	0.355212
lcl|BN001301.1_cds_CBF70506.1_610	0.3999	0.528129	0.231856	0.394782
lcl|BN001301.1_cds_CBF70508.1_611	0.350496	0.428028	0.213746	0.359704
lcl|BN001301.1_cds_CBF70510.1_612	0.348336	0.442072	0.230022	0.351437
lcl|BN001301.1_cds_CBF70512.1_613	0.353069	0.438728	0.243376	0.363206
lcl|BN001301.1_cds_CBF70514.1_614	0.447883	0.659753	0.265732	0.437753
lcl|BN001301.1_cds_CBF70516.1_615	0.382568	0.51868	0.24121	0.38084
lcl|BN001301.1_cds_CBF70518.1_616	0.411197	0.580053	0.227221	0.405645
lcl|BN001301.1_cds_CBF70520.1_617	0.361448	0.471994	0.21987	0.368212
lcl|BN001301.1_cds_CBF70522.1_618	0.37697	0.480781	0.201868	0.39333
lcl|BN001301.1_cds_CBF70524.1_619	0.373278	0.525498	0.237777	0.382448
lcl|BN001301.1_cds_CBF70526.1_620	0.46233	0.664417	0.270864	0.455939
lcl|BN001301.1_cds_CBF70528.1_621	0.357551	0.446235	0.227364	0.368118
lcl|BN001301.1_cds_CBF70529.1_622	0.455832	0.637265	0.280879	0.438554
lcl|BN001301.1_cds_CBF70531.1_623	0.344483	0.473992	0.223514	0.36542
lcl|BN001301.1_cds_CBF70533.1_624	0.413918	0.566752	0.214525	0.418388
lcl|BN001301.1_cds_CBF70535.1_625	0.352604	0.440668	0.201819	0.363527
lcl|BN001301.1_cds_CBF70537.1_626	0.342775	0.409651	0.233052	0.347483
lcl|BN001301.1_cds_CBF70539.1_627	0.395871	0.492887	0.227703	0.40008
lcl|BN001301.1_cds_CBF70540.1_628	0.368371	0.424907	0.221119	0.371011
lcl|BN001301.1_cds_CBF70542.1_629	0.472764	0.658647	0.170797	0.489006
lcl|BN001301.1_cds_CBF70544.1_630	0.315232	0.387472	0.207749	0.327859
lcl|BN001301.1_cds_CBF70546.1_631	0.38702	0.499752	0.205244	0.395547
lcl|BN001301.1_cds_CBF70548.1_632	0.339048	0.408508	0.214228	0.343533
lcl|BN001301.1_cds_CBF70550.1_633	0.366272	0.429994	0.228024	0.372575
lcl|BN001301.1_cds_CBF70552.1_634	0.387267	0.508493	0.216337	0.394253
lcl|BN001301.1_cds_CBF70554.1_635	0.371149	0.455928	0.216807	0.385391
lcl|BN001301.1_cds_CBF70556.1_636	0.372019	0.45003	0.218198	0.381508
lcl|BN001301.1_cds_CBF70557.1_637	0.348764	0.43846	0.213165	0.359631
lcl|BN001301.1_cds_CBF70559.1_638	0.279575	0.319209	0.213654	0.305674
lcl|BN001301.1_cds_CBF70561.1_639	0.358857	0.434481	0.205268	0.361347
lcl|BN001301.1_cds_CBF70563.1_640	0.380462	0.467542	0.232596	0.386124
lcl|BN001301.1_cds_CBF70565.1_641	0.344369	0.415201	0.183294	0.3586
lcl|BN001301.1_cds_CBF70567.1_642	0.356724	0.420324	0.218148	0.366475
lcl|BN001301.1_cds_CBF70569.1_643	0.345491	0.400757	0.201601	0.353431
lcl|BN001301.1_cds_CBF70571.1_644	0.336513	0.422629	0.185078	0.350579
lcl|BN001301.1_cds_CBF70573.1_645	0.456024	0.638398	0.245554	0.444994
lcl|BN001301.1_cds_CBF70575.1_646	0.372337	0.465987	0.229551	0.376905
lcl|BN001301.1_cds_CBF70577.1_647	0.412423	0.522269	0.232277	0.409726
lcl|BN001301.1_cds_CBF70579.1_648	0.418397	0.585584	0.25073	0.400907
lcl|BN001301.1_cds_CBF70581.1_649	0.419876	0.554684	0.215917	0.420229
lcl|BN001301.1_cds_CBF70583.1_650	0.361654	0.430145	0.224446	0.368146
lcl|BN001301.1_cds_CBF70584.1_651	0.366855	0.447257	0.207065	0.374056
lcl|BN001301.1_cds_CBF70586.1_652	0.37584	0.46355	0.239133	0.381933
lcl|BN001301.1_cds_CBF70588.1_653	0.396704	0.502222	0.207703	0.406175
lcl|BN001301.1_cds_CBF70590.1_654	0.358137	0.436783	0.213388	0.367017
lcl|BN001301.1_cds_CBF70592.1_655	0.384628	0.471115	0.208533	0.383447
lcl|BN001301.1_cds_CBF70594.1_656	0.547208	0.835634	0.256282	0.510501
lcl|BN001301.1_cds_CBF70596.1_657	0.404976	0.522675	0.276782	0.404826
lcl|BN001301.1_cds_CBF70597.1_658	0.343948	0.42983	0.215885	0.355505
lcl|BN001301.1_cds_CBF70599.1_659	0.484668	0.712824	0.25106	0.473602
lcl|BN001301.1_cds_CBF70601.1_660	0.346915	0.419898	0.222246	0.356403
lcl|BN001301.1_cds_CBF70603.1_661	0.360951	0.448402	0.21303	0.363054
lcl|BN001301.1_cds_CBF70605.1_662	0.367948	0.448403	0.233633	0.373585
lcl|BN001301.1_cds_CBF70607.1_663	0.391409	0.468278	0.238151	0.389744
lcl|BN001301.1_cds_CBF70609.1_664	0.397473	0.484759	0.238281	0.401723
lcl|BN001301.1_cds_CBF70611.1_665	0.315635	0.375882	0.236948	0.328075
lcl|BN001301.1_cds_CBF70612.1_666	0.348688	0.455143	0.230581	0.348895
lcl|BN001301.1_cds_CBF70614.1_667	0.391991	0.479552	0.18472	0.404186
lcl|BN001301.1_cds_CBF70616.1_668	0.459851	0.62622	0.233029	0.456687
lcl|BN001301.1_cds_CBF70618.1_669	0.398486	0.526274	0.227417	0.393214
lcl|BN001301.1_cds_CBF70620.1_670	0.385685	0.500211	0.213245	0.384058
lcl|BN001301.1_cds_CBF70622.1_671	0.346238	0.424738	0.213972	0.351255
lcl|BN001301.1_cds_CBF70624.1_672	0.360732	0.448052	0.226175	0.367545
lcl|BN001301.1_cds_CBF70626.1_673	0.334153	0.422426	0.191749	0.349445
lcl|BN001301.1_cds_CBF70628.1_674	0.362146	0.442237	0.211172	0.367949
lcl|BN001301.1_cds_CBF70629.1_675	0.362889	0.457054	0.215842	0.370368
lcl|BN001301.1_cds_CBF70631.1_676	0.368953	0.45441	0.219234	0.36962
lcl|BN001301.1_cds_CBF70633.1_677	0.407673	0.543216	0.249705	0.404503
lcl|BN001301.1_cds_CBF70635.1_678	0.493329	0.706259	0.231278	0.479324
lcl|BN001301.1_cds_CBF70637.1_679	0.369363	0.462667	0.205961	0.37962
lcl|BN001301.1_cds_CBF70639.1_680	0.331158	0.416584	0.2174	0.347298
lcl|BN001301.1_cds_CBF70640.1_681	0.442307	0.571678	0.220587	0.435773
lcl|BN001301.1_cds_CBF70642.1_682	0.400875	0.528779	0.218176	0.406254
lcl|BN001301.1_cds_CBF70644.1_683	0.325587	0.381445	0.228889	0.332783
lcl|BN001301.1_cds_CBF70646.1_684	0.361576	0.462407	0.194742	0.371215
lcl|BN001301.1_cds_CBF70647.1_685	0.404935	0.523517	0.223805	0.399215
lcl|BN001301.1_cds_CBF70649.1_686	0.386332	0.492331	0.213761	0.387909
lcl|BN001301.1_cds_CBF70650.1_687	0.410384	0.530787	0.204803	0.414066
lcl|BN001301.1_cds_CBF70652.1_688	0.372213	0.456957	0.201946	0.381561
lcl|BN001301.1_cds_CBF70654.1_689	0.355366	0.424006	0.211204	0.364406
lcl|BN001301.1_cds_CBF70656.1_690	0.387363	0.61842	0.242174	0.373102
lcl|BN001301.1_cds_CBF70657.1_691	0.416312	0.525357	0.26802	0.414339
lcl|BN001301.1_cds_CBF70659.1_692	0.352213	0.420365	0.198976	0.37111
lcl|BN001301.1_cds_CBF70661.1_693	0.345359	0.417787	0.223379	0.35381
lcl|BN001301.1_cds_CBF70663.1_694	0.312297	0.358859	0.216836	0.321134
lcl|BN001301.1_cds_CBF70665.1_695	0.35705	0.428229	0.22133	0.363535
lcl|BN001301.1_cds_CBF70666.1_696	0.406766	0.516024	0.214581	0.412637
lcl|BN001301.1_cds_CBF70668.1_697	0.388322	0.49059	0.218369	0.394475
lcl|BN001301.1_cds_CBF70670.1_698	0.334495	0.399803	0.196165	0.348498
lcl|BN001301.1_cds_CBF70672.1_699	0.37575	0.434711	0.20681	0.379895
lcl|BN001301.1_cds_CBF70674.1_700	0.42924	0.565535	0.214947	0.433038
lcl|BN001301.1_cds_CBF70675.1_701	0.340839	0.429331	0.212936	0.339774
lcl|BN001301.1_cds_CBF70677.1_702	0.354969	0.42789	0.209789	0.362549
lcl|BN001301.1_cds_CBF70679.1_703	0.389336	0.497757	0.211852	0.398563
lcl|BN001301.1_cds_CBF70681.1_704	0.456972	0.613603	0.222444	0.453392
lcl|BN001301.1_cds_CBF70683.1_705	0.393083	0.488638	0.210007	0.39752
lcl|BN001301.1_cds_CBF70684.1_706	0.34387	0.409351	0.194654	0.357438
lcl|BN001301.1_cds_CBF70686.1_707	0.357946	0.470362	0.220202	0.361678
lcl|BN001301.1_cds_CBF70688.1_708	0.415138	0.554205	0.223266	0.411544
lcl|BN001301.1_cds_CBF70690.1_709	0.475497	0.705599	0.218238	0.46345
lcl|BN001301.1_cds_CBF70692.1_710	0.36428	0.463345	0.208644	0.365501
lcl|BN001301.1_cds_CBF70694.1_711	0.412076	0.524501	0.189336	0.423451
lcl|BN001301.1_cds_CBF70696.1_712	0.358748	0.436997	0.197006	0.368927
lcl|BN001301.1_cds_CBF70698.1_713	0.358242	0.440447	0.196834	0.367202
lcl|BN001301.1_cds_CBF70700.1_714	0.352946	0.433801	0.223072	0.363752
lcl|BN001301.1_cds_CBF70701.1_715	0.332124	0.388663	0.217423	0.346687
lcl|BN001301.1_cds_CBF70703.1_716	0.439586	0.558404	0.233567	0.435324
lcl|BN001301.1_cds_CBF70705.1_717	0.36596	0.457758	0.226206	0.370029
lcl|BN001301.1_cds_CBF70707.1_718	0.36801	0.437305	0.235838	0.372405
lcl|BN001301.1_cds_CBF70709.1_719	0.378804	0.455326	0.215495	0.380833
lcl|BN001301.1_cds_CBF70711.1_720	0.367701	0.457745	0.198838	0.378894
lcl|BN001301.1_cds_CBF70712.1_721	0.385452	0.480732	0.251954	0.376769
lcl|BN001301.1_cds_CBF70714.1_722	0.349107	0.426523	0.214652	0.360192
lcl|BN001301.1_cds_CBF70716.1_723	0.391355	0.504415	0.256907	0.38252
lcl|BN001301.1_cds_CBF70718.1_724	0.33215	0.407463	0.201991	0.33616
lcl|BN001301.1_cds_CBF70720.1_725	0.403275	0.5629	0.281983	0.399888
lcl|BN001301.1_cds_CBF70722.1_726	0.383101	0.52545	0.247797	0.38271
lcl|BN001301.1_cds_CBF70724.1_727	0.383174	0.479345	0.312879	0.380182
lcl|BN001301.1_cds_CBF70726.1_728	0.425945	0.583526	0.277265	0.416804
lcl|BN001301.1_cds_CBF70728.1_729	0.397213	0.539549	0.2766	0.388547
lcl|BN001301.1_cds_CBF70730.1_730	0.383629	0.45757	0.213296	0.38211
lcl|BN001301.1_cds_CBF70732.1_731	0.592938	0.859767	0.266616	0.546407
lcl|BN001301.1_cds_CBF70733.1_732	0.3982	0.495337	0.205039	0.398839
lcl|BN001301.1_cds_CBF70735.1_733	0.376973	0.468786	0.231582	0.38108
lcl|BN001301.1_cds_CBF70737.1_734	0.384634	0.491144	0.250955	0.37774
lcl|BN001301.1_cds_CBF70739.1_735	0.416517	0.560864	0.263009	0.406634
lcl|BN001301.1_cds_CBF70741.1_736	0.377819	0.490545	0.222611	0.383645
lcl|BN001301.1_cds_CBF70743.1_737	0.307415	0.337174	0.228329	0.323974
lcl|BN001301.1_cds_CBF70745.1_738	0.371228	0.482888	0.246995	0.373828
lcl|BN001301.1_cds_CBF70747.1_739	0.355722	0.417199	0.229796	0.368892
lcl|BN001301.1_cds_CBF70749.1_740	0.416814	0.563722	0.233067	0.415719
lcl|BN001301.1_cds_CBF70751.1_741	0.293855	0.274384	0.201278	0.296651
lcl|BN001301.1_cds_CBF70753.1_742	0.537248	0.804733	0.184315	0.493828
lcl|BN001301.1_cds_CBF70755.1_743	0.360516	0.436641	0.248293	0.36509
lcl|BN001301.1_cds_CBF70756.1_744	0.402916	0.513967	0.246869	0.40099
lcl|BN001301.1_cds_CBF70758.1_745	0.373991	0.483377	0.262472	0.380426
lcl|BN001301.1_cds_CBF70760.1_746	0.371431	0.491732	0.233565	0.379184
lcl|BN001301.1_cds_CBF70762.1_747	0.36247	0.445458	0.213592	0.367953
lcl|BN001301.1_cds_CBF70764.1_748	0.436797	0.588419	0.268546	0.437457
lcl|BN001301.1_cds_CBF70766.1_749	0.368749	0.435265	0.22599	0.380163
lcl|BN001301.1_cds_CBF70770.1_751	0.323048	0.367786	0.242079	0.326002
lcl|BN001301.1_cds_CBF70772.1_752	0.34991	0.422976	0.22223	0.359826
lcl|BN001301.1_cds_CBF70774.1_753	0.355027	0.441922	0.203102	0.370806
lcl|BN001301.1_cds_CBF70776.1_754	0.416575	0.564457	0.264039	0.411433
lcl|BN001301.1_cds_CBF70777.1_755	0.344541	0.424224	0.197976	0.354163
lcl|BN001301.1_cds_CBF70779.1_756	0.376473	0.484241	0.222002	0.379123
lcl|BN001301.1_cds_CBF70781.1_757	0.381517	0.44609	0.203798	0.387144
lcl|BN001301.1_cds_CBF70783.1_758	0.371129	0.456201	0.20846	0.375362
lcl|BN001301.1_cds_CBF70785.1_759	0.35144	0.399557	0.206062	0.354306
lcl|BN001301.1_cds_CBF70787.1_760	0.342283	0.392558	0.1926	0.352369
lcl|BN001301.1_cds_CBF70789.1_761	0.323213	0.395624	0.217656	0.342217
lcl|BN001301.1_cds_CBF70791.1_762	0.365148	0.446761	0.22737	0.375243
lcl|BN001301.1_cds_CBF70793.1_763	0.356668	0.404352	0.209744	0.361251
lcl|BN001301.1_cds_CBF70795.1_764	0.335424	0.394203	0.219874	0.345461
lcl|BN001301.1_cds_CBF70797.1_765	0.36895	0.460512	0.199694	0.380279
lcl|BN001301.1_cds_CBF70798.1_766	0.354767	0.419008	0.190643	0.371043
lcl|BN001301.1_cds_CBF70800.1_767	0.401291	0.494626	0.198031	0.411287
lcl|BN001301.1_cds_CBF70802.1_768	0.311561	0.352217	0.215378	0.323307
lcl|BN001301.1_cds_CBF70804.1_769	0.336974	0.406379	0.177822	0.360748
lcl|BN001301.1_cds_CBF70806.1_770	0.333035	0.394463	0.214101	0.337752
lcl|BN001301.1_cds_CBF70808.1_771	0.328432	0.387613	0.198835	0.342717
lcl|BN001301.1_cds_CBF70810.1_772	0.393908	0.487358	0.189994	0.407185
lcl|BN001301.1_cds_CBF70812.1_773	0.362589	0.469733	0.188528	0.370022
lcl|BN001301.1_cds_CBF70814.1_774	0.332577	0.384923	0.186132	0.347879
lcl|BN001301.1_cds_CBF70815.1_775	0.337982	0.408527	0.206868	0.349956
lcl|BN001301.1_cds_CBF70817.1_776	0.3609	0.434557	0.202626	0.373021
lcl|BN001301.1_cds_CBF70819.1_777	0.422488	0.502478	0.162572	0.441775
lcl|BN001301.1_cds_CBF70821.1_778	0.344662	0.397104	0.206384	0.351827
lcl|BN001301.1_cds_CBF70823.1_779	0.464454	0.623243	0.212765	0.453307
lcl|BN001301.1_cds_CBF70825.1_780	0.349446	0.396756	0.189098	0.360217
lcl|BN001301.1_cds_CBF70827.1_781	0.336073	0.388888	0.218262	0.342394
lcl|BN001301.1_cds_CBF70829.1_782	0.296216	0.395616	0.18694	0.326293
lcl|BN001301.1_cds_CBF70831.1_783	0.308221	0.353622	0.194536	0.321192
lcl|BN001301.1_cds_CBF70833.1_784	0.327686	0.378237	0.171151	0.34551
lcl|BN001301.1_cds_CBF70835.1_785	0.329573	0.371268	0.196119	0.339307
lcl|BN001301.1_cds_CBF70837.1_786	0.333667	0.388766	0.198946	0.343276
lcl|BN001301.1_cds_CBF70839.1_787	0.345579	0.396187	0.195122	0.356838
lcl|BN001301.1_cds_CBF70841.1_788	0.339655	0.380154	0.193401	0.353247
lcl|BN001301.1_cds_CBF70843.1_789	0.350684	0.423062	0.208642	0.365561
lcl|BN001301.1_cds_CBF70845.1_790	0.343062	0.391724	0.214468	0.353327
lcl|BN001301.1_cds_CBF70846.1_791	0.362749	0.4522	0.191028	0.372899
lcl|BN001301.1_cds_CBF70848.1_792	0.344051	0.405708	0.218196	0.354585
lcl|BN001301.1_cds_CBF70850.1_793	0.324139	0.371055	0.180337	0.34182
lcl|BN001301.1_cds_CBF70852.1_794	0.384028	0.442468	0.198252	0.385416
lcl|BN001301.1_cds_CBF70854.1_795	0.308609	0.350807	0.212623	0.318749
lcl|BN001301.1_cds_CBF70856.1_796	0.323905	0.388048	0.243248	0.330164
lcl|BN001301.1_cds_CBF70858.1_797	0.482761	0.618939	0.183126	0.474471
lcl|BN001301.1_cds_CBF70859.1_798	0.515823	0.715046	0.202448	0.499404
lcl|BN001301.1_cds_CBF70861.1_799	0.360605	0.415879	0.173836	0.377358
lcl|BN001301.1_cds_CBF70863.1_800	0.341376	0.392313	0.210122	0.35407
lcl|BN001301.1_cds_CBF70865.1_801	0.429603	0.565748	0.203449	0.421797
lcl|BN001301.1_cds_CBF70867.1_802	0.34565	0.424904	0.238597	0.349715
lcl|BN001301.1_cds_CBF70869.1_803	0.368958	0.486443	0.222405	0.378065
lcl|BN001301.1_cds_CBF70870.1_804	0.364302	0.438575	0.214644	0.365574
lcl|BN001301.1_cds_CBF70872.1_805	0.409023	0.529107	0.199752	0.418023
lcl|BN001301.1_cds_CBF70874.1_806	0.397203	0.538086	0.209691	0.403873
lcl|BN001301.1_cds_CBF70876.1_807	0.378174	0.458701	0.198341	0.385989
lcl|BN001301.1_cds_CBF70878.1_808	0.366324	0.450274	0.217745	0.374045
lcl|BN001301.1_cds_CBF70880.1_809	0.397322	0.566612	0.23757	0.404725
lcl|BN001301.1_cds_CBF70882.1_810	0.337764	0.411167	0.1743	0.35264
lcl|BN001301.1_cds_CBF70884.1_811	0.449163	0.601845	0.214438	0.448338
lcl|BN001301.1_cds_CBF70886.1_812	0.343469	0.400642	0.207677	0.355885
lcl|BN001301.1_cds_CBF70887.1_813	0.340508	0.40819	0.197816	0.34887
lcl|BN001301.1_cds_CBF70889.1_814	0.391186	0.485821	0.256792	0.386109
lcl|BN001301.1_cds_CBF70891.1_815	0.318865	0.359181	0.217159	0.331152
lcl|BN001301.1_cds_CBF70893.1_816	0.358164	0.431222	0.229528	0.365007
lcl|BN001301.1_cds_CBF70895.1_817	0.353438	0.409531	0.213412	0.36441
lcl|BN001301.1_cds_CBF70897.1_818	0.358133	0.436648	0.218769	0.36453
lcl|BN001301.1_cds_CBF70899.1_819	0.350597	0.408428	0.192954	0.364088
lcl|BN001301.1_cds_CBF70901.1_820	0.379611	0.487423	0.220442	0.397519
lcl|BN001301.1_cds_CBF70903.1_821	0.361614	0.425499	0.206142	0.371398
lcl|BN001301.1_cds_CBF70905.1_822	0.359572	0.441735	0.194282	0.367315
lcl|BN001301.1_cds_CBF70907.1_823	0.346731	0.406925	0.203929	0.353539
lcl|BN001301.1_cds_CBF70908.1_824	0.404592	0.521468	0.211424	0.411128
lcl|BN001301.1_cds_CBF70910.1_825	0.34444	0.413695	0.216655	0.3524
lcl|BN001301.1_cds_CBF70912.1_826	0.361692	0.426531	0.208628	0.373988
lcl|BN001301.1_cds_CBF70914.1_827	0.35654	0.396641	0.219368	0.363977
lcl|BN001301.1_cds_CBF70916.1_828	0.54168	0.758436	0.185008	0.534243
lcl|BN001301.1_cds_CBF70918.1_829	0.358611	0.44588	0.218137	0.366639
lcl|BN001301.1_cds_CBF70920.1_830	0.344316	0.421789	0.209317	0.3532
lcl|BN001301.1_cds_CBF70921.1_831	0.349029	0.4189	0.195188	0.355973
lcl|BN001301.1_cds_CBF70923.1_832	0.342099	0.43533	0.202569	0.347146
lcl|BN001301.1_cds_CBF70925.1_833	0.367973	0.460568	0.204889	0.375592
lcl|BN001301.1_cds_CBF70927.1_834	0.354717	0.416939	0.209454	0.36315
lcl|BN001301.1_cds_CBF70929.1_835	0.384871	0.495203	0.225363	0.390554
lcl|BN001301.1_cds_CBF70931.1_836	0.349128	0.415148	0.202338	0.356323
lcl|BN001301.1_cds_CBF70933.1_837	0.389706	0.507858	0.212684	0.390779
lcl|BN001301.1_cds_CBF70935.1_838	0.368821	0.470175	0.224533	0.371943
lcl|BN001301.1_cds_CBF70937.1_839	0.409731	0.526523	0.216244	0.407328
lcl|BN001301.1_cds_CBF70939.1_840	0.365339	0.458566	0.224787	0.371255
lcl|BN001301.1_cds_CBF70941.1_841	0.343399	0.419098	0.207192	0.354904
lcl|BN001301.1_cds_CBF70943.1_842	0.328381	0.365345	0.214085	0.348479
lcl|BN001301.1_cds_CBF70945.1_843	0.359202	0.42572	0.226209	0.366923
lcl|BN001301.1_cds_CBF70946.1_844	0.441388	0.590858	0.215838	0.434794
lcl|BN001301.1_cds_CBF70948.1_845	0.381748	0.512429	0.213368	0.387281
lcl|BN001301.1_cds_CBF70950.1_846	0.513296	0.784496	0.202388	0.503604
lcl|BN001301.1_cds_CBF70952.1_847	0.298669	0.338991	0.187702	0.31326
lcl|BN001301.1_cds_CBF70954.1_848	0.401096	0.510709	0.243578	0.400351
lcl|BN001301.1_cds_CBF70956.1_849	0.381016	0.493192	0.206238	0.39246
lcl|BN001301.1_cds_CBF70958.1_850	0.324178	0.385092	0.20285	0.336293
lcl|BN001301.1_cds_CBF70960.1_851	0.373718	0.474916	0.210738	0.37428
lcl|BN001301.1_cds_CBF70962.1_852	0.402415	0.51534	0.232092	0.408395
lcl|BN001301.1_cds_CBF70964.1_853	0.37049	0.446811	0.236248	0.378703
lcl|BN001301.1_cds_CBF70966.1_854	0.339772	0.406455	0.240968	0.344459
lcl|BN001301.1_cds_CBF70968.1_855	0.350256	0.421163	0.19559	0.366898
lcl|BN001301.1_cds_CBF70970.1_856	0.347191	0.409009	0.201623	0.355877
lcl|BN001301.1_cds_CBF70972.1_857	0.336715	0.410976	0.198768	0.346421
lcl|BN001301.1_cds_CBF70974.1_858	0.345272	0.422131	0.218327	0.352704
lcl|BN001301.1_cds_CBF70976.1_859	0.354729	0.437808	0.245963	0.346577
lcl|BN001301.1_cds_CBF70977.1_860	0.362148	0.446378	0.201459	0.372237
lcl|BN001301.1_cds_CBF70979.1_861	0.386944	0.439588	0.287068	0.393405
lcl|BN001301.1_cds_CBF70981.1_862	0.421772	0.569206	0.258465	0.411702
lcl|BN001301.1_cds_CBF70983.1_863	0.354924	0.425795	0.232124	0.368296
lcl|BN001301.1_cds_CBF70985.1_864	0.312856	0.342521	0.177064	0.331053
lcl|BN001301.1_cds_CBF70987.1_865	0.339704	0.419193	0.203557	0.34769
lcl|BN001301.1_cds_CBF70989.1_866	0.362723	0.43158	0.242579	0.368477
lcl|BN001301.1_cds_CBF70991.1_867	0.342049	0.416692	0.213136	0.350785
lcl|BN001301.1_cds_CBF70993.1_868	0.556251	0.799334	0.195052	0.536987
lcl|BN001301.1_cds_CBF70994.1_869	0.36692	0.429865	0.215586	0.369166
lcl|BN001301.1_cds_CBF70996.1_870	0.322886	0.398163	0.232116	0.335515
lcl|BN001301.1_cds_CBF70998.1_871	0.408385	0.512461	0.253818	0.414899
lcl|BN001301.1_cds_CBF71000.1_872	0.363017	0.420496	0.237109	0.370939
lcl|BN001301.1_cds_CBF71002.1_873	0.386724	0.467129	0.207252	0.394141
lcl|BN001301.1_cds_CBF71004.1_874	0.354445	0.424407	0.22801	0.36336
lcl|BN001301.1_cds_CBF71006.1_875	0.352555	0.427451	0.191176	0.366543
lcl|BN001301.1_cds_CBF71007.1_876	0.365528	0.459109	0.235404	0.366032
lcl|BN001301.1_cds_CBF71009.1_877	0.368661	0.452227	0.219623	0.370807
lcl|BN001301.1_cds_CBF71011.1_878	0.343269	0.412074	0.223758	0.346019
lcl|BN001301.1_cds_CBF71013.1_879	0.354029	0.408855	0.233784	0.362469
lcl|BN001301.1_cds_CBF71015.1_880	0.365457	0.427471	0.207392	0.372617
lcl|BN001301.1_cds_CBF71017.1_881	0.374857	0.519047	0.236831	0.379751
lcl|BN001301.1_cds_CBF71019.1_882	0.330698	0.40714	0.210407	0.339238
lcl|BN001301.1_cds_CBF71021.1_883	0.443453	0.593178	0.243816	0.443642
lcl|BN001301.1_cds_CBF71023.1_884	0.375514	0.451255	0.220259	0.379667
lcl|BN001301.1_cds_CBF71025.1_885	0.346709	0.456768	0.235276	0.35629
lcl|BN001301.1_cds_CBF71027.1_886	0.26036	0.239553	0.244888	0.269681
lcl|BN001301.1_cds_CBF71029.1_887	0.341527	0.41418	0.24602	0.346681
lcl|BN001301.1_cds_CBF71031.1_888	0.384763	0.480512	0.20654	0.388547
lcl|BN001301.1_cds_CBF71032.1_889	0.345784	0.393627	0.241702	0.35875
lcl|BN001301.1_cds_CBF71034.1_890	0.433881	0.601734	0.215855	0.432798
lcl|BN001301.1_cds_CBF71036.1_891	0.342317	0.408926	0.232236	0.345831
lcl|BN001301.1_cds_CBF71038.1_892	0.347912	0.412325	0.204433	0.359455
lcl|BN001301.1_cds_CBF71040.1_893	0.354784	0.402574	0.195135	0.363416
lcl|BN001301.1_cds_CBF71041.1_894	0.377182	0.45627	0.21877	0.384098
lcl|BN001301.1_cds_CBF71043.1_895	0.370645	0.448352	0.248216	0.382405
lcl|BN001301.1_cds_CBF71045.1_896	0.360718	0.447461	0.200547	0.375477
lcl|BN001301.1_cds_CBF71047.1_897	0.366849	0.461526	0.231893	0.373093
lcl|BN001301.1_cds_CBF71049.1_898	0.363212	0.44818	0.20651	0.368439
lcl|BN001301.1_cds_CBF71051.1_899	0.346231	0.420052	0.201717	0.354713
lcl|BN001301.1_cds_CBF71053.1_900	0.36612	0.444394	0.205383	0.374874
lcl|BN001301.1_cds_CBF71055.1_901	0.388303	0.472106	0.226238	0.385382
lcl|BN001301.1_cds_CBF71057.1_902	0.392585	0.492011	0.293241	0.390287
lcl|BN001301.1_cds_CBF71058.1_903	0.376818	0.491156	0.220655	0.380802
lcl|BN001301.1_cds_CBF71060.1_904	0.40068	0.505573	0.234963	0.396767
lcl|BN001301.1_cds_CBF71062.1_905	0.372999	0.447433	0.240593	0.382003
lcl|BN001301.1_cds_CBF71064.1_906	0.355909	0.429175	0.205182	0.365824
lcl|BN001301.1_cds_CBF71066.1_907	0.368967	0.45822	0.235749	0.368471
lcl|BN001301.1_cds_CBF71068.1_908	0.364783	0.44352	0.203736	0.371868
lcl|BN001301.1_cds_CBF71070.1_909	0.353827	0.391077	0.218452	0.357252
lcl|BN001301.1_cds_CBF71071.1_910	0.341365	0.398152	0.211289	0.352837
lcl|BN001301.1_cds_CBF71073.1_911	0.389725	0.502448	0.202702	0.400709
lcl|BN001301.1_cds_CBF71075.1_912	0.373466	0.460522	0.206066	0.380882
lcl|BN001301.1_cds_CBF71077.1_913	0.343091	0.380641	0.197275	0.355633
lcl|BN001301.1_cds_CBF71079.1_914	0.352815	0.440292	0.197755	0.360731
lcl|BN001301.1_cds_CBF71081.1_915	0.351514	0.406156	0.226731	0.369561
lcl|BN001301.1_cds_CBF71083.1_916	0.357471	0.428607	0.209676	0.364195
lcl|BN001301.1_cds_CBF71085.1_917	0.37781	0.480875	0.204871	0.391089
lcl|BN001301.1_cds_CBF71087.1_918	0.369282	0.430696	0.235982	0.382522
lcl|BN001301.1_cds_CBF71089.1_919	0.363326	0.445088	0.18893	0.378566
lcl|BN001301.1_cds_CBF71090.1_920	0.356241	0.442686	0.209574	0.368514
lcl|BN001301.1_cds_CBF71092.1_921	0.365617	0.452359	0.210934	0.371259
lcl|BN001301.1_cds_CBF71094.1_922	0.358009	0.437563	0.200229	0.37201
lcl|BN001301.1_cds_CBF71096.1_923	0.398114	0.49139	0.225977	0.414055
lcl|BN001301.1_cds_CBF71098.1_924	0.352969	0.45611	0.221538	0.352634
lcl|BN001301.1_cds_CBF71100.1_925	0.359315	0.433328	0.192446	0.372008
lcl|BN001301.1_cds_CBF71102.1_926	0.351542	0.425524	0.193316	0.362364
lcl|BN001301.1_cds_CBF71104.1_927	0.34387	0.40147	0.217274	0.347733
lcl|BN001301.1_cds_CBF71106.1_928	0.353411	0.422163	0.201821	0.356944
lcl|BN001301.1_cds_CBF71108.1_929	0.367657	0.456586	0.24401	0.369626
lcl|BN001301.1_cds_CBF71110.1_930	0.366756	0.464358	0.232653	0.374696
lcl|BN001301.1_cds_CBF71112.1_931	0.328533	0.391085	0.229246	0.334645
lcl|BN001301.1_cds_CBF71114.1_932	0.346373	0.437566	0.210216	0.357737
lcl|BN001301.1_cds_CBF71116.1_933	0.396548	0.531487	0.244111	0.398466
lcl|BN001301.1_cds_CBF71117.1_934	0.355019	0.440346	0.240107	0.357846
lcl|BN001301.1_cds_CBF71119.1_935	0.372051	0.474014	0.218817	0.37898
lcl|BN001301.1_cds_CBF71121.1_936	0.358418	0.442573	0.238436	0.361145
lcl|BN001301.1_cds_CBF71123.1_937	0.359855	0.444176	0.235629	0.360778
lcl|BN001301.1_cds_CBF71125.1_938	0.363874	0.434557	0.212968	0.369598
lcl|BN001301.1_cds_CBF71127.1_939	0.382345	0.463664	0.205017	0.392746
lcl|BN001301.1_cds_CBF71129.1_940	0.382917	0.506443	0.23787	0.377629
lcl|BN001301.1_cds_CBF71131.1_941	0.473895	0.640068	0.230712	0.456703
lcl|BN001301.1_cds_CBF71133.1_942	0.559956	0.825292	0.243822	0.534924
lcl|BN001301.1_cds_CBF71135.1_943	0.586824	0.826138	0.244537	0.550042
lcl|BN001301.1_cds_CBF71137.1_944	0.525873	0.76616	0.19865	0.501935
lcl|BN001301.1_cds_CBF71138.1_945	0.437603	0.537864	0.220575	0.418392
lcl|BN001301.1_cds_CBF71140.1_946	0.355502	0.435575	0.219831	0.35902
lcl|BN001301.1_cds_CBF71142.1_947	0.36465	0.457109	0.216278	0.376108
lcl|BN001301.1_cds_CBF71144.1_948	0.37216	0.468007	0.224793	0.374755
lcl|BN001301.1_cds_CBF71146.1_949	0.359881	0.44437	0.214556	0.36959
lcl|BN001301.1_cds_CBF71148.1_950	0.445704	0.583411	0.193727	0.453794
lcl|BN001301.1_cds_CBF71150.1_951	0.345932	0.432934	0.196667	0.360872
lcl|BN001301.1_cds_CBF71152.1_952	0.478417	0.67812	0.216049	0.462837
lcl|BN001301.1_cds_CBF71154.1_953	0.370744	0.454293	0.224516	0.375141
lcl|BN001301.1_cds_CBF71156.1_954	0.349981	0.410324	0.202615	0.357541
lcl|BN001301.1_cds_CBF71157.1_955	0.416021	0.524913	0.206901	0.417028
lcl|BN001301.1_cds_CBF71159.1_956	0.429438	0.565923	0.224939	0.424514
lcl|BN001301.1_cds_CBF71161.1_957	0.379091	0.490904	0.233255	0.381573
lcl|BN001301.1_cds_CBF71163.1_958	0.347155	0.421948	0.212273	0.356105
lcl|BN001301.1_cds_CBF71165.1_959	0.332487	0.422119	0.206735	0.35069
lcl|BN001301.1_cds_CBF71167.1_960	0.371664	0.445985	0.209856	0.38175
lcl|BN001301.1_cds_CBF71169.1_961	0.266888	0.325633	0.2469	0.282904
lcl|BN001301.1_cds_CBF71171.1_962	0.337897	0.401418	0.203388	0.355771
lcl|BN001301.1_cds_CBF71172.1_963	0.357263	0.43916	0.238536	0.365983
lcl|BN001301.1_cds_CBF71174.1_964	0.476229	0.668113	0.256243	0.457225
lcl|BN001301.1_cds_CBF71176.1_965	0.468237	0.642974	0.211847	0.462713
lcl|BN001301.1_cds_CBF71178.1_966	0.39915	0.518771	0.214692	0.402185
lcl|BN001301.1_cds_CBF71180.1_967	0.498954	0.730744	0.22741	0.485412
lcl|BN001301.1_cds_CBF71182.1_968	0.374777	0.478046	0.24163	0.383157
lcl|BN001301.1_cds_CBF71184.1_969	0.427457	0.559943	0.245267	0.424622
lcl|BN001301.1_cds_CBF71186.1_970	0.390862	0.561518	0.211467	0.395561
lcl|BN001301.1_cds_CBF71188.1_971	0.446629	0.614379	0.303167	0.419569
lcl|BN001301.1_cds_CBF71190.1_972	0.388757	0.531865	0.249807	0.389071
lcl|BN001301.1_cds_CBF71192.1_973	0.411247	0.53908	0.23728	0.407649
lcl|BN001301.1_cds_CBF71194.1_974	0.428282	0.63364	0.234867	0.42868
lcl|BN001301.1_cds_CBF71196.1_975	0.366145	0.491827	0.229325	0.371598
lcl|BN001301.1_cds_CBF71198.1_976	0.361227	0.443599	0.212557	0.362976
lcl|BN001301.1_cds_CBF71200.1_977	0.371968	0.471518	0.217687	0.385356
lcl|BN001301.1_cds_CBF71201.1_978	0.391574	0.535345	0.251583	0.393303
lcl|BN001301.1_cds_CBF71203.1_979	0.387582	0.485393	0.235304	0.39399
lcl|BN001301.1_cds_CBF71205.1_980	0.358462	0.484444	0.238018	0.35974
lcl|BN001301.1_cds_CBF71207.1_981	0.323709	0.40107	0.210197	0.32624
lcl|BN001301.1_cds_CBF71209.1_982	0.367716	0.480703	0.208605	0.381321
lcl|BN001301.1_cds_CBF71211.1_983	0.377347	0.481424	0.240964	0.376396
lcl|BN001301.1_cds_CBF71213.1_984	0.379157	0.447318	0.232095	0.379207
lcl|BN001301.1_cds_CBF71215.1_985	0.485682	0.729238	0.212257	0.475222
lcl|BN001301.1_cds_CBF71217.1_986	0.410429	0.540134	0.249059	0.409354
lcl|BN001301.1_cds_CBF71218.1_987	0.42131	0.556039	0.254657	0.407981
lcl|BN001301.1_cds_CBF71220.1_988	0.374836	0.525155	0.245132	0.379374
lcl|BN001301.1_cds_CBF71222.1_989	0.354984	0.437452	0.237852	0.359171
lcl|BN001301.1_cds_CBF71224.1_990	0.363314	0.436441	0.221407	0.376533
lcl|BN001301.1_cds_CBF71226.1_991	0.361231	0.433462	0.209708	0.370031
lcl|BN001301.1_cds_CBF71228.1_992	0.484013	0.636975	0.165836	0.502872
lcl|BN001301.1_cds_CBF71230.1_993	0.3462	0.428856	0.25396	0.345816
lcl|BN001301.1_cds_CBF71232.1_994	0.361088	0.439843	0.224758	0.367568
lcl|BN001301.1_cds_CBF71234.1_995	0.581074	0.845953	0.19753	0.545252
lcl|BN001301.1_cds_CBF71236.1_996	0.360159	0.473444	0.247002	0.358884
lcl|BN001301.1_cds_CBF71237.1_997	0.382741	0.477559	0.2286	0.390981
lcl|BN001301.1_cds_CBF71239.1_998	0.345347	0.414916	0.22084	0.356884
lcl|BN001301.1_cds_CBF71241.1_999	0.351154	0.432437	0.223604	0.356724
lcl|BN001301.1_cds_CBF71243.1_1000	0.340487	0.416511	0.199433	0.356287
lcl|BN001301.1_cds_CBF71245.1_1001	0.356272	0.454576	0.18644	0.3718
lcl|BN001301.1_cds_CBF71247.1_1002	0.378047	0.473929	0.181896	0.393119
lcl|BN001301.1_cds_CBF71249.1_1003	0.411926	0.519184	0.230618	0.415521
lcl|BN001301.1_cds_CBF71251.1_1004	0.455611	0.598147	0.227736	0.449152
lcl|BN001301.1_cds_CBF71253.1_1005	0.4103	0.531988	0.215497	0.404003
lcl|BN001301.1_cds_CBF71254.1_1006	0.360459	0.442865	0.201662	0.37393
lcl|BN001301.1_cds_CBF71257.1_1007	0.306923	0.32984	0.161667	0.332833
lcl|BN001301.1_cds_CBF71258.1_1008	0.362664	0.456625	0.204589	0.379369
lcl|BN001301.1_cds_CBF71260.1_1009	0.492992	0.728223	0.281808	0.470516
lcl|BN001301.1_cds_CBF71262.1_1010	0.370962	0.445254	0.222964	0.374987
lcl|BN001301.1_cds_CBF71264.1_1011	0.382263	0.468394	0.217918	0.393436
lcl|BN001301.1_cds_CBF71266.1_1012	0.37716	0.482349	0.209955	0.380041
lcl|BN001301.1_cds_CBF71268.1_1013	0.475795	0.727954	0.196496	0.470179
lcl|BN001301.1_cds_CBF71270.1_1014	0.331874	0.413981	0.205126	0.325671
lcl|BN001301.1_cds_CBF71271.1_1015	0.398416	0.499169	0.244141	0.403859
lcl|BN001301.1_cds_CBF71273.1_1016	0.35695	0.428945	0.134537	0.361571
lcl|BN001301.1_cds_CBF71275.1_1017	0.432529	0.582208	0.237713	0.422052
lcl|BN001301.1_cds_CBF71277.1_1018	0.516456	0.733324	0.193253	0.510768
lcl|BN001301.1_cds_CBF71279.1_1019	0.352453	0.469376	0.21274	0.377217
lcl|BN001301.1_cds_CBF71281.1_1020	0.355766	0.446892	0.211609	0.360959
lcl|BN001301.1_cds_CBF71283.1_1021	0.408851	0.518304	0.211417	0.413791
lcl|BN001301.1_cds_CBF71285.1_1022	0.341514	0.428383	0.206274	0.352993
lcl|BN001301.1_cds_CBF71287.1_1023	0.408391	0.516428	0.212259	0.410151
lcl|BN001301.1_cds_CBF71289.1_1024	0.343876	0.421093	0.201201	0.361021
lcl|BN001301.1_cds_CBF71291.1_1025	0.348856	0.395383	0.212623	0.35769
lcl|BN001301.1_cds_CBF71293.1_1026	0.478498	0.627672	0.178592	0.47619
lcl|BN001301.1_cds_CBF71295.1_1027	0.278782	0.305985	0.360776	0.272816
lcl|BN001301.1_cds_CBF71296.1_1028	0.36747	0.444293	0.215666	0.37336
lcl|BN001301.1_cds_CBF71298.1_1029	0.348095	0.401199	0.205904	0.359702
lcl|BN001301.1_cds_CBF71300.1_1030	0.359256	0.436316	0.22033	0.362038
lcl|BN001301.1_cds_CBF71302.1_1031	0.381724	0.464725	0.212372	0.395442
lcl|BN001301.1_cds_CBF71304.1_1032	0.340174	0.404168	0.223159	0.34627
lcl|BN001301.1_cds_CBF71306.1_1033	0.381488	0.472816	0.223297	0.382189
lcl|BN001301.1_cds_CBF71308.1_1034	0.349421	0.408448	0.205223	0.366154
lcl|BN001301.1_cds_CBF71310.1_1035	0.348896	0.40461	0.224041	0.355708
lcl|BN001301.1_cds_CBF71312.1_1036	0.414033	0.50865	0.228676	0.414651
lcl|BN001301.1_cds_CBF71313.1_1037	0.571186	0.83767	0.19693	0.544665
lcl|BN001301.1_cds_CBF71315.1_1038	0.387598	0.47984	0.233503	0.393674
lcl|BN001301.1_cds_CBF71317.1_1039	0.401464	0.487354	0.232792	0.401807
lcl|BN001301.1_cds_CBF71319.1_1040	0.350787	0.445716	0.21632	0.35911
lcl|BN001301.1_cds_CBF71321.1_1041	0.354122	0.41042	0.208608	0.364657
lcl|BN001301.1_cds_CBF71323.1_1042	0.380875	0.455423	0.218358	0.387058
lcl|BN001301.1_cds_CBF71325.1_1043	0.364792	0.459102	0.219798	0.367585
lcl|BN001301.1_cds_CBF71327.1_1044	0.364487	0.448683	0.249057	0.365849
lcl|BN001301.1_cds_CBF71329.1_1045	0.357784	0.443978	0.236079	0.363399
lcl|BN001301.1_cds_CBF71331.1_1046	0.400803	0.529545	0.206015	0.417666
lcl|BN001301.1_cds_CBF71333.1_1047	0.412337	0.530239	0.186128	0.418539
lcl|BN001301.1_cds_CBF71335.1_1048	0.365154	0.457963	0.189523	0.375511
lcl|BN001301.1_cds_CBF71337.1_1049	0.43076	0.544764	0.222855	0.427588
lcl|BN001301.1_cds_CBF71339.1_1050	0.351874	0.420974	0.223352	0.355792
lcl|BN001301.1_cds_CBF71341.1_1051	0.34837	0.408791	0.201793	0.355691
lcl|BN001301.1_cds_CBF71343.1_1052	0.343429	0.403245	0.205658	0.353398
lcl|BN001301.1_cds_CBF71344.1_1053	0.393178	0.51076	0.220597	0.392392
lcl|BN001301.1_cds_CBF71346.1_1054	0.490509	0.723281	0.214969	0.482344
lcl|BN001301.1_cds_CBF71348.1_1055	0.324435	0.363479	0.242869	0.329908
lcl|BN001301.1_cds_CBF71350.1_1056	0.421573	0.529652	0.242409	0.427629
lcl|BN001301.1_cds_CBF71352.1_1057	0.354971	0.443602	0.225001	0.36379
lcl|BN001301.1_cds_CBF71354.1_1058	0.36636	0.453783	0.228721	0.36915
lcl|BN001301.1_cds_CBF71356.1_1059	0.393692	0.467595	0.234789	0.390945
lcl|BN001301.1_cds_CBF71357.1_1060	0.367608	0.469842	0.221831	0.373216
lcl|BN001301.1_cds_CBF71359.1_1061	0.413311	0.511752	0.233141	0.409127
lcl|BN001301.1_cds_CBF71361.1_1062	0.368866	0.456134	0.218922	0.373554
lcl|BN001301.1_cds_CBF71363.1_1063	0.389766	0.506582	0.204597	0.393956
lcl|BN001301.1_cds_CBF71365.1_1064	0.351865	0.406899	0.178773	0.362228
lcl|BN001301.1_cds_CBF71367.1_1065	0.390998	0.474981	0.235356	0.3933
lcl|BN001301.1_cds_CBF71369.1_1066	0.377768	0.469771	0.230128	0.381777
lcl|BN001301.1_cds_CBF71371.1_1067	0.378692	0.480459	0.242096	0.377961
lcl|BN001301.1_cds_CBF71373.1_1068	0.361066	0.45887	0.232143	0.354034
lcl|BN001301.1_cds_CBF71374.1_1069	0.35734	0.43792	0.235913	0.35505
lcl|BN001301.1_cds_CBF71376.1_1070	0.404431	0.529138	0.276938	0.408763
lcl|BN001301.1_cds_CBF71378.1_1071	0.365803	0.475584	0.243504	0.368884
lcl|BN001301.1_cds_CBF71380.1_1072	0.42687	0.593951	0.258684	0.416178
lcl|BN001301.1_cds_CBF71382.1_1073	0.384342	0.358817	0.258136	0.37385
lcl|BN001301.1_cds_CBF71384.1_1074	0.371237	0.50735	0.266969	0.371291
lcl|BN001301.1_cds_CBF71386.1_1075	0.367215	0.459919	0.245122	0.373397
lcl|BN001301.1_cds_CBF71388.1_1076	0.346277	0.447898	0.238651	0.353513
lcl|BN001301.1_cds_CBF71390.1_1077	0.411069	0.548629	0.243963	0.410853
lcl|BN001301.1_cds_CBF71392.1_1078	0.468462	0.65216	0.249112	0.453707
lcl|BN001301.1_cds_CBF71393.1_1079	0.381158	0.479355	0.204842	0.387585
lcl|BN001301.1_cds_CBF71395.1_1080	0.369953	0.454448	0.256322	0.371952
lcl|BN001301.1_cds_CBF71397.1_1081	0.380083	0.501334	0.270589	0.369765
lcl|BN001301.1_cds_CBF71399.1_1082	0.366888	0.448112	0.209524	0.368718
lcl|BN001301.1_cds_CBF71401.1_1083	0.353405	0.416278	0.21732	0.363926
lcl|BN001301.1_cds_CBF71403.1_1084	0.34385	0.41015	0.225906	0.349482
lcl|BN001301.1_cds_CBF71405.1_1085	0.385085	0.462836	0.20654	0.391166
lcl|BN001301.1_cds_CBF71407.1_1086	0.390955	0.492567	0.272428	0.388774
lcl|BN001301.1_cds_CBF71409.1_1087	0.373053	0.495958	0.238645	0.373861
lcl|BN001301.1_cds_CBF71411.1_1088	0.359627	0.428429	0.23162	0.363718
lcl|BN001301.1_cds_CBF71413.1_1089	0.369342	0.472143	0.245089	0.370113
lcl|BN001301.1_cds_CBF71415.1_1090	0.350969	0.424026	0.226767	0.356343
lcl|BN001301.1_cds_CBF71416.1_1091	0.334266	0.381764	0.226171	0.342345
lcl|BN001301.1_cds_CBF71418.1_1092	0.383961	0.484383	0.247634	0.387482
lcl|BN001301.1_cds_CBF71420.1_1093	0.342417	0.420683	0.213814	0.353257
lcl|BN001301.1_cds_CBF71422.1_1094	0.346381	0.418517	0.23303	0.350166
lcl|BN001301.1_cds_CBF71424.1_1095	0.358985	0.448131	0.218165	0.367507
lcl|BN001301.1_cds_CBF71426.1_1096	0.373397	0.484337	0.21946	0.380142
lcl|BN001301.1_cds_CBF71428.1_1097	0.40411	0.559441	0.247419	0.40524
lcl|BN001301.1_cds_CBF71430.1_1098	0.357863	0.447043	0.214663	0.361759
lcl|BN001301.1_cds_CBF71432.1_1099	0.367383	0.45581	0.219913	0.370328
lcl|BN001301.1_cds_CBF71434.1_1100	0.367784	0.461601	0.229158	0.377187
lcl|BN001301.1_cds_CBF71436.1_1101	0.425553	0.553815	0.240571	0.421213
lcl|BN001301.1_cds_CBF71438.1_1102	0.357061	0.453776	0.227416	0.369217
lcl|BN001301.1_cds_CBF71440.1_1103	0.38092	0.514159	0.245564	0.379203
lcl|BN001301.1_cds_CBF71442.1_1104	0.365149	0.450541	0.224185	0.366093
lcl|BN001301.1_cds_CBF71444.1_1105	0.369468	0.454697	0.245007	0.388942
lcl|BN001301.1_cds_CBF71445.1_1106	0.395299	0.506645	0.217977	0.405943
lcl|BN001301.1_cds_CBF71447.1_1107	0.375509	0.453108	0.224836	0.373555
lcl|BN001301.1_cds_CBF71449.1_1108	0.380107	0.488329	0.232765	0.380464
lcl|BN001301.1_cds_CBF71451.1_1109	0.390045	0.529463	0.233706	0.390167
lcl|BN001301.1_cds_CBF71453.1_1110	0.391374	0.513405	0.262365	0.387974
lcl|BN001301.1_cds_CBF71455.1_1111	0.42377	0.593373	0.189234	0.413338
lcl|BN001301.1_cds_CBF71457.1_1112	0.406661	0.543218	0.205075	0.41174
lcl|BN001301.1_cds_CBF71459.1_1113	0.418452	0.579455	0.263087	0.41417
lcl|BN001301.1_cds_CBF71461.1_1114	0.348922	0.423329	0.249465	0.352752
lcl|BN001301.1_cds_CBF71463.1_1115	0.325764	0.405754	0.248344	0.332379
lcl|BN001301.1_cds_CBF71465.1_1116	0.346083	0.430219	0.226893	0.355492
lcl|BN001301.1_cds_CBF71467.1_1117	0.379653	0.46522	0.200767	0.387126
lcl|BN001301.1_cds_CBF71469.1_1118	0.376475	0.468265	0.232254	0.385322
lcl|BN001301.1_cds_CBF71470.1_1119	0.344382	0.421763	0.223984	0.356765
lcl|BN001301.1_cds_CBF71472.1_1120	0.312721	0.367115	0.165246	0.335099
lcl|BN001301.1_cds_CBF71474.1_1121	0.361534	0.465388	0.197534	0.382992
lcl|BN001301.1_cds_CBF71476.1_1122	0.412013	0.54752	0.25326	0.406671
lcl|BN001301.1_cds_CBF71478.1_1123	0.408791	0.556628	0.247382	0.407662
lcl|BN001301.1_cds_CBF71480.1_1124	0.398644	0.501735	0.250818	0.407153
lcl|BN001301.1_cds_CBF71482.1_1125	0.378043	0.468156	0.243288	0.379023
lcl|BN001301.1_cds_CBF71484.1_1126	0.345868	0.398716	0.23188	0.351425
lcl|BN001301.1_cds_CBF71486.1_1127	0.390048	0.524971	0.23938	0.391967
lcl|BN001301.1_cds_CBF71487.1_1128	0.382364	0.495761	0.231081	0.374972
lcl|BN001301.1_cds_CBF71489.1_1129	0.3265	0.382345	0.203397	0.337195
lcl|BN001301.1_cds_CBF71491.1_1130	0.351202	0.419766	0.197712	0.361461
lcl|BN001301.1_cds_CBF71493.1_1131	0.434144	0.606566	0.240795	0.42371
lcl|BN001301.1_cds_CBF71495.1_1132	0.395543	0.505382	0.227264	0.393576
lcl|BN001301.1_cds_CBF71497.1_1133	0.410462	0.569669	0.252506	0.406313
lcl|BN001301.1_cds_CBF71499.1_1134	0.372275	0.471428	0.239719	0.369848
lcl|BN001301.1_cds_CBF71501.1_1135	0.398625	0.564677	0.241187	0.396966
lcl|BN001301.1_cds_CBF71503.1_1136	0.433767	0.619393	0.255834	0.424335
lcl|BN001301.1_cds_CBF71505.1_1137	0.371407	0.48327	0.243818	0.372681
lcl|BN001301.1_cds_CBF71507.1_1138	0.374226	0.482902	0.258847	0.380732
lcl|BN001301.1_cds_CBF71509.1_1139	0.379836	0.516554	0.258105	0.372262
lcl|BN001301.1_cds_CBF71511.1_1140	0.381071	0.499928	0.228112	0.383742
lcl|BN001301.1_cds_CBF71513.1_1141	0.378415	0.483634	0.219183	0.385288
lcl|BN001301.1_cds_CBF71516.1_1143	0.392901	0.497741	0.225729	0.400387
lcl|BN001301.1_cds_CBF71517.1_1144	0.352196	0.465166	0.216483	0.361845
lcl|BN001301.1_cds_CBF71519.1_1145	0.406585	0.516169	0.211841	0.409058
lcl|BN001301.1_cds_CBF71521.1_1146	0.381436	0.480331	0.245616	0.380607
lcl|BN001301.1_cds_CBF71523.1_1147	0.406248	0.561489	0.203794	0.413181
lcl|BN001301.1_cds_CBF71525.1_1148	0.382314	0.482657	0.245364	0.387062
lcl|BN001301.1_cds_CBF71527.1_1149	0.401571	0.534155	0.256978	0.401466
lcl|BN001301.1_cds_CBF71529.1_1150	0.402566	0.493207	0.188578	0.400459
lcl|BN001301.1_cds_CBF71531.1_1151	0.32161	0.37768	0.2408	0.330847
lcl|BN001301.1_cds_CBF71533.1_1152	0.361664	0.472492	0.227162	0.368975
lcl|BN001301.1_cds_CBF71535.1_1153	0.369628	0.466686	0.241158	0.377011
lcl|BN001301.1_cds_CBF71537.1_1154	0.346218	0.427307	0.245495	0.347396
lcl|BN001301.1_cds_CBF71539.1_1155	0.379192	0.439706	0.224751	0.388246
lcl|BN001301.1_cds_CBF71541.1_1156	0.373185	0.458773	0.205919	0.377284
lcl|BN001301.1_cds_CBF71543.1_1157	0.355735	0.442343	0.206006	0.364621
lcl|BN001301.1_cds_CBF71545.1_1158	0.385963	0.488751	0.219499	0.388055
lcl|BN001301.1_cds_CBF71547.1_1159	0.359478	0.44355	0.218826	0.36575
lcl|BN001301.1_cds_CBF71549.1_1160	0.417718	0.568371	0.224654	0.416314
lcl|BN001301.1_cds_CBF71551.1_1161	0.370733	0.479136	0.243859	0.371828
lcl|BN001301.1_cds_CBF71552.1_1162	0.443604	0.646203	0.220829	0.444648
lcl|BN001301.1_cds_CBF71554.1_1163	0.374785	0.480422	0.24218	0.371603
lcl|BN001301.1_cds_CBF71556.1_1164	0.379442	0.482472	0.242089	0.381759
lcl|BN001301.1_cds_CBF71558.1_1165	0.317942	0.413572	0.236797	0.330808
lcl|BN001301.1_cds_CBF71560.1_1166	0.381112	0.458606	0.192832	0.39459
lcl|BN001301.1_cds_CBF71562.1_1167	0.337744	0.410987	0.205949	0.34909
lcl|BN001301.1_cds_CBF71564.1_1168	0.400245	0.542173	0.233267	0.407995
lcl|BN001301.1_cds_CBF71566.1_1169	0.34963	0.409299	0.220772	0.34891
lcl|BN001301.1_cds_CBF71568.1_1170	0.404046	0.528221	0.23299	0.416091
lcl|BN001301.1_cds_CBF71570.1_1171	0.329819	0.386927	0.23907	0.339088
lcl|BN001301.1_cds_CBF71572.1_1172	0.41587	0.522264	0.233685	0.410535
lcl|BN001301.1_cds_CBF71574.1_1173	0.390656	0.492724	0.220603	0.396422
lcl|BN001301.1_cds_CBF71576.1_1174	0.430272	0.55541	0.253726	0.422872
lcl|BN001301.1_cds_CBF71578.1_1175	0.337021	0.40124	0.203618	0.344858
lcl|BN001301.1_cds_CBF71580.1_1176	0.340089	0.413948	0.228358	0.341931
lcl|BN001301.1_cds_CBF71582.1_1177	0.383379	0.490977	0.242305	0.390713
lcl|BN001301.1_cds_CBF71584.1_1178	0.35243	0.447084	0.214644	0.357388
lcl|BN001301.1_cds_CBF71585.1_1179	0.391888	0.521385	0.214925	0.39834
lcl|BN001301.1_cds_CBF71587.1_1180	0.32874	0.401913	0.217449	0.338454
lcl|BN001301.1_cds_CBF71589.1_1181	0.359333	0.448503	0.214042	0.360342
lcl|BN001301.1_cds_CBF71591.1_1182	0.362688	0.439967	0.237829	0.366797
lcl|BN001301.1_cds_CBF71593.1_1183	0.434906	0.561247	0.216702	0.425304
lcl|BN001301.1_cds_CBF71595.1_1184	0.400715	0.502899	0.232129	0.397717
lcl|BN001301.1_cds_CBF71597.1_1185	0.323866	0.385034	0.244904	0.333548
lcl|BN001301.1_cds_CBF71599.1_1186	0.347494	0.41021	0.222043	0.355026
lcl|BN001301.1_cds_CBF71601.1_1187	0.380914	0.473739	0.216723	0.385939
lcl|BN001301.1_cds_CBF71603.1_1188	0.47542	0.616081	0.233095	0.474891
lcl|BN001301.1_cds_CBF71605.1_1189	0.358875	0.449867	0.209254	0.369978
lcl|BN001301.1_cds_CBF71607.1_1190	0.337242	0.428963	0.231072	0.339543
lcl|BN001301.1_cds_CBF71609.1_1191	0.419586	0.574951	0.243589	0.41881
lcl|BN001301.1_cds_CBF71611.1_1192	0.279054	0.378636	0.162463	0.317538
lcl|BN001301.1_cds_CBF71613.1_1193	0.352299	0.45422	0.228781	0.355425
lcl|BN001301.1_cds_CBF71615.1_1194	0.399205	0.522609	0.213969	0.410675
lcl|BN001301.1_cds_CBF71617.1_1195	0.367507	0.449968	0.213546	0.377437
lcl|BN001301.1_cds_CBF71619.1_1196	0.394072	0.49337	0.241387	0.388417
lcl|BN001301.1_cds_CBF71620.1_1197	0.394513	0.505165	0.242261	0.402336
lcl|BN001301.1_cds_CBF71622.1_1198	0.411698	0.52634	0.247413	0.410828
lcl|BN001301.1_cds_CBF71624.1_1199	0.37407	0.457067	0.214822	0.381255
lcl|BN001301.1_cds_CBF71626.1_1200	0.364507	0.460486	0.227989	0.368981
lcl|BN001301.1_cds_CBF71628.1_1201	0.390772	0.520889	0.228929	0.389381
lcl|BN001301.1_cds_CBF71630.1_1202	0.379616	0.490872	0.261577	0.373875
lcl|BN001301.1_cds_CBF71632.1_1203	0.371683	0.462421	0.208667	0.373232
lcl|BN001301.1_cds_CBF71634.1_1204	0.353443	0.48476	0.228074	0.362251
lcl|BN001301.1_cds_CBF71636.1_1205	0.333206	0.414185	0.224872	0.334297
lcl|BN001301.1_cds_CBF71638.1_1206	0.344083	0.406051	0.228439	0.353278
lcl|BN001301.1_cds_CBF71640.1_1207	0.412179	0.523062	0.224649	0.410613
lcl|BN001301.1_cds_CBF71642.1_1208	0.356353	0.44844	0.225786	0.361407
lcl|BN001301.1_cds_CBF71644.1_1209	0.302661	0.370072	0.22023	0.315338
lcl|BN001301.1_cds_CBF71646.1_1210	0.365306	0.452138	0.239799	0.368283
lcl|BN001301.1_cds_CBF71648.1_1211	0.361408	0.490842	0.259194	0.36876
lcl|BN001301.1_cds_CBF71650.1_1212	0.35395	0.412652	0.199768	0.367705
lcl|BN001301.1_cds_CBF71651.1_1213	0.357979	0.437203	0.191348	0.372439
lcl|BN001301.1_cds_CBF71653.1_1214	0.362669	0.447984	0.239472	0.371728
lcl|BN001301.1_cds_CBF71655.1_1215	0.396787	0.502005	0.221546	0.399804
lcl|BN001301.1_cds_CBF71657.1_1216	0.366476	0.480936	0.224794	0.370778
lcl|BN001301.1_cds_CBF71659.1_1217	0.336966	0.407934	0.216863	0.349463
lcl|BN001301.1_cds_CBF71661.1_1218	0.326125	0.389998	0.198897	0.340284
lcl|BN001301.1_cds_CBF71663.1_1219	0.349249	0.41645	0.192641	0.363119
lcl|BN001301.1_cds_CBF71665.1_1220	0.338287	0.416694	0.235532	0.343894
lcl|BN001301.1_cds_CBF71666.1_1221	0.418955	0.563409	0.211373	0.419201
lcl|BN001301.1_cds_CBF71668.1_1222	0.362579	0.448976	0.210099	0.371802
lcl|BN001301.1_cds_CBF71670.1_1223	0.330696	0.391736	0.20988	0.342109
lcl|BN001301.1_cds_CBF71671.1_1224	0.403732	0.505697	0.240017	0.40385
lcl|BN001301.1_cds_CBF71673.1_1225	0.355563	0.437308	0.193882	0.366566
lcl|BN001301.1_cds_CBF71675.1_1226	0.357997	0.426927	0.207523	0.363166
lcl|BN001301.1_cds_CBF71677.1_1227	0.373111	0.457267	0.223377	0.38356
lcl|BN001301.1_cds_CBF71679.1_1228	0.352503	0.391153	0.190907	0.366457
lcl|BN001301.1_cds_CBF71681.1_1229	0.355865	0.428079	0.213232	0.366332
lcl|BN001301.1_cds_CBF71683.1_1230	0.34279	0.394584	0.217977	0.349423
lcl|BN001301.1_cds_CBF71685.1_1231	0.382974	0.478966	0.198745	0.395868
lcl|BN001301.1_cds_CBF71687.1_1232	0.370358	0.407956	0.258135	0.377686
lcl|BN001301.1_cds_CBF71688.1_1233	0.343844	0.406987	0.216429	0.360593
lcl|BN001301.1_cds_CBF71690.1_1234	0.523317	0.740025	0.217382	0.506213
lcl|BN001301.1_cds_CBF71692.1_1235	0.333249	0.413449	0.221249	0.335455
lcl|BN001301.1_cds_CBF71694.1_1236	0.42534	0.542676	0.223245	0.4207
lcl|BN001301.1_cds_CBF71696.1_1237	0.38781	0.469776	0.188805	0.407005
lcl|BN001301.1_cds_CBF71698.1_1238	0.399777	0.51446	0.236178	0.397487
lcl|BN001301.1_cds_CBF71700.1_1239	0.31434	0.367703	0.209003	0.327473
lcl|BN001301.1_cds_CBF71702.1_1240	0.378838	0.476758	0.212565	0.383303
lcl|BN001301.1_cds_CBF71703.1_1241	0.366533	0.437673	0.232155	0.381957
lcl|BN001301.1_cds_CBF71706.1_1243	0.347121	0.402359	0.20837	0.352628
lcl|BN001301.1_cds_CBF71708.1_1244	0.378202	0.464461	0.192626	0.382244
lcl|BN001301.1_cds_CBF71710.1_1245	0.333916	0.436004	0.196954	0.343673
lcl|BN001301.1_cds_CBF71712.1_1246	0.387426	0.470125	0.222604	0.392943
lcl|BN001301.1_cds_CBF71714.1_1247	0.348853	0.429386	0.19397	0.358894
lcl|BN001301.1_cds_CBF71716.1_1248	0.358437	0.414361	0.213822	0.366889
lcl|BN001301.1_cds_CBF71718.1_1249	0.369093	0.433031	0.227363	0.372404
lcl|BN001301.1_cds_CBF71720.1_1250	0.342649	0.408536	0.216837	0.354424
lcl|BN001301.1_cds_CBF71722.1_1251	0.354005	0.422749	0.233786	0.36622
lcl|BN001301.1_cds_CBF71724.1_1252	0.378358	0.493009	0.232937	0.378868
lcl|BN001301.1_cds_CBF71727.1_1254	0.338	0.408555	0.260932	0.336617
lcl|BN001301.1_cds_CBF71729.1_1255	0.427072	0.616102	0.281398	0.408704
lcl|BN001301.1_cds_CBF71731.1_1256	0.330665	0.398277	0.216028	0.345467
lcl|BN001301.1_cds_CBF71733.1_1257	0.388489	0.489685	0.23684	0.393199
lcl|BN001301.1_cds_CBF71735.1_1258	0.436261	0.585121	0.201589	0.436541
lcl|BN001301.1_cds_CBF71737.1_1259	0.402613	0.500077	0.204679	0.407381
lcl|BN001301.1_cds_CBF71739.1_1260	0.390626	0.463051	0.246727	0.391589
lcl|BN001301.1_cds_CBF71741.1_1261	0.465604	0.640357	0.220063	0.473018
lcl|BN001301.1_cds_CBF71743.1_1262	0.431026	0.550708	0.253277	0.436376
lcl|BN001301.1_cds_CBF71745.1_1263	0.43353	0.594092	0.235575	0.426983
lcl|BN001301.1_cds_CBF71747.1_1264	0.396819	0.511512	0.220344	0.396288
lcl|BN001301.1_cds_CBF71749.1_1265	0.358497	0.452201	0.228553	0.361131
lcl|BN001301.1_cds_CBF71750.1_1266	0.388832	0.505614	0.276316	0.395101
lcl|BN001301.1_cds_CBF71752.1_1267	0.360033	0.457688	0.247556	0.362945
lcl|BN001301.1_cds_CBF71754.1_1268	0.343233	0.432855	0.241738	0.350325
lcl|BN001301.1_cds_CBF71756.1_1269	0.381765	0.477873	0.226555	0.385712
lcl|BN001301.1_cds_CBF71758.1_1270	0.352547	0.500271	0.194706	0.363447
lcl|BN001301.1_cds_CBF71760.1_1271	0.357964	0.438088	0.221561	0.357648
lcl|BN001301.1_cds_CBF71762.1_1272	0.36417	0.455752	0.222742	0.369289
lcl|BN001301.1_cds_CBF71764.1_1273	0.36579	0.442458	0.241997	0.371436
lcl|BN001301.1_cds_CBF71766.1_1274	0.364827	0.463165	0.256833	0.367059
lcl|BN001301.1_cds_CBF71768.1_1275	0.367847	0.481027	0.249481	0.358667
lcl|BN001301.1_cds_CBF71770.1_1276	0.388532	0.516561	0.236481	0.385958
lcl|BN001301.1_cds_CBF71772.1_1277	0.378878	0.484158	0.230737	0.385927
lcl|BN001301.1_cds_CBF71773.1_1278	0.380222	0.490616	0.226464	0.38166
lcl|BN001301.1_cds_CBF71775.1_1279	0.371481	0.459805	0.209818	0.389724
lcl|BN001301.1_cds_CBF71777.1_1280	0.356985	0.4263	0.237181	0.365391
lcl|BN001301.1_cds_CBF71779.1_1281	0.339954	0.428421	0.218093	0.351382
lcl|BN001301.1_cds_CBF71781.1_1282	0.356416	0.453255	0.239323	0.351778
lcl|BN001301.1_cds_CBF71783.1_1283	0.382127	0.489387	0.221798	0.389225
lcl|BN001301.1_cds_CBF71785.1_1284	0.398344	0.504528	0.240127	0.39979
lcl|BN001301.1_cds_CBF71787.1_1285	0.391255	0.506372	0.235496	0.388421
lcl|BN001301.1_cds_CBF71788.1_1286	0.343262	0.445661	0.249055	0.34858
lcl|BN001301.1_cds_CBF71790.1_1287	0.388968	0.476667	0.245758	0.38668
lcl|BN001301.1_cds_CBF71792.1_1288	0.368868	0.473107	0.248376	0.369364
lcl|BN001301.1_cds_CBF71793.1_1289	0.393225	0.482496	0.224831	0.391519
lcl|BN001301.1_cds_CBF71795.1_1290	0.335122	0.408867	0.215655	0.34906
lcl|BN001301.1_cds_CBF71797.1_1291	0.388296	0.511413	0.247222	0.389019
lcl|BN001301.1_cds_CBF71799.1_1292	0.385963	0.487936	0.241358	0.381853
lcl|BN001301.1_cds_CBF71801.1_1293	0.366342	0.425713	0.206792	0.375337
lcl|BN001301.1_cds_CBF71803.1_1294	0.399427	0.54286	0.240992	0.398474
lcl|BN001301.1_cds_CBF71805.1_1295	0.368799	0.456289	0.2399	0.369489
lcl|BN001301.1_cds_CBF71807.1_1296	0.362146	0.442713	0.215812	0.366544
lcl|BN001301.1_cds_CBF71809.1_1297	0.398231	0.505385	0.202091	0.409391
lcl|BN001301.1_cds_CBF71811.1_1298	0.364835	0.4462	0.217487	0.371445
lcl|BN001301.1_cds_CBF71813.1_1299	0.351963	0.418281	0.200659	0.365388
lcl|BN001301.1_cds_CBF71815.1_1300	0.392604	0.551356	0.191521	0.410602
lcl|BN001301.1_cds_CBF71817.1_1301	0.341751	0.381147	0.211947	0.353814
lcl|BN001301.1_cds_CBF71819.1_1302	0.326054	0.353312	0.211732	0.335332
lcl|BN001301.1_cds_CBF71821.1_1303	0.368614	0.488016	0.222663	0.376155
lcl|BN001301.1_cds_CBF71823.1_1304	0.479458	0.713528	0.222941	0.4732
lcl|BN001301.1_cds_CBF71825.1_1305	0.35048	0.418951	0.187944	0.360673
lcl|BN001301.1_cds_CBF71827.1_1306	0.363926	0.450742	0.243576	0.364064
lcl|BN001301.1_cds_CBF71829.1_1307	0.345179	0.396589	0.207375	0.357962
lcl|BN001301.1_cds_CBF71830.1_1308	0.358529	0.471232	0.241206	0.353906
lcl|BN001301.1_cds_CBF71832.1_1309	0.360191	0.428269	0.223699	0.366737
lcl|BN001301.1_cds_CBF71834.1_1310	0.370237	0.453489	0.197376	0.383521
lcl|BN001301.1_cds_CBF71836.1_1311	0.27325	0.318789	0.187883	0.309876
lcl|BN001301.1_cds_CBF71837.1_1312	0.335679	0.390034	0.202654	0.349481
lcl|BN001301.1_cds_CBF71839.1_1313	0.398921	0.470667	0.206743	0.401913
lcl|BN001301.1_cds_CBF71841.1_1314	0.343684	0.408601	0.222829	0.348828
lcl|BN001301.1_cds_CBF71843.1_1315	0.398478	0.47297	0.203297	0.406805
lcl|BN001301.1_cds_CBF71844.1_1316	0.349761	0.446465	0.185299	0.370236
lcl|BN001301.1_cds_CBF71846.1_1317	0.375147	0.526115	0.205466	0.376519
lcl|BN001301.1_cds_CBF71848.1_1318	0.328223	0.379781	0.226708	0.337522
lcl|BN001301.1_cds_CBF71850.1_1319	0.358577	0.417007	0.235422	0.350797
lcl|BN001301.1_cds_CBF71852.1_1320	0.342697	0.390302	0.226526	0.348828
lcl|BN001301.1_cds_CBF71854.1_1321	0.383439	0.516518	0.221833	0.383941
lcl|BN001301.1_cds_CBF71856.1_1322	0.27786	0.292697	0.182884	0.299349
lcl|BN001301.1_cds_CBF71858.1_1323	0.309666	0.323699	0.154027	0.337947
lcl|BN001301.1_cds_CBF71860.1_1324	0.338239	0.39654	0.176173	0.362708
lcl|BN001301.1_cds_CBF71862.1_1325	0.391864	0.542189	0.275007	0.389846
lcl|BN001301.1_cds_CBF71863.1_1326	0.430399	0.607193	0.249073	0.429132
lcl|BN001302.1_cds_1411	0.370953	0.471525	0.229725	0.373153
lcl|BN001302.1_cds_1487	0.382088	0.4823	0.207071	0.389349
lcl|BN001302.1_cds_1998	0.301419	0.348135	0.194497	0.319321
lcl|BN001302.1_cds_2136	0.421536	0.591165	0.228925	0.414307
lcl|BN001302.1_cds_2316	0.335598	0.482119	0.170816	0.364452
lcl|BN001302.1_cds_2459	0.3205	0.390092	0.217098	0.327507
lcl|BN001302.1_cds_2501	0.328464	0.392408	0.222003	0.330933
lcl|BN001302.1_cds_2679	0.340158	0.412879	0.217159	0.353081
lcl|BN001302.1_cds_CBF73380.1_1327	0.338609	0.435215	0.223826	0.360889
lcl|BN001302.1_cds_CBF73382.1_1328	0.331713	0.413113	0.205601	0.338535
lcl|BN001302.1_cds_CBF73384.1_1329	0.394448	0.547272	0.213179	0.405926
lcl|BN001302.1_cds_CBF73386.1_1330	0.347439	0.417334	0.243265	0.349314
lcl|BN001302.1_cds_CBF73388.1_1331	0.37722	0.506617	0.220134	0.374931
lcl|BN001302.1_cds_CBF73390.1_1332	0.369642	0.485834	0.211334	0.369568
lcl|BN001302.1_cds_CBF73392.1_1333	0.358987	0.435554	0.217796	0.367059
lcl|BN001302.1_cds_CBF73394.1_1334	0.362077	0.430379	0.207337	0.374412
lcl|BN001302.1_cds_CBF73396.1_1335	0.351723	0.465117	0.228326	0.362217
lcl|BN001302.1_cds_CBF73397.1_1336	0.382781	0.504172	0.25027	0.382427
lcl|BN001302.1_cds_CBF73399.1_1337	0.336411	0.410409	0.208044	0.346604
lcl|BN001302.1_cds_CBF73401.1_1338	0.346637	0.419219	0.18925	0.357534
lcl|BN001302.1_cds_CBF73403.1_1339	0.384291	0.496291	0.211429	0.394815
lcl|BN001302.1_cds_CBF73405.1_1340	0.345037	0.409094	0.249948	0.348134
lcl|BN001302.1_cds_CBF73407.1_1341	0.351706	0.431745	0.202329	0.362385
lcl|BN001302.1_cds_CBF73409.1_1342	0.276731	0.325618	0.149719	0.310348
lcl|BN001302.1_cds_CBF73411.1_1343	0.346085	0.439147	0.214673	0.361297
lcl|BN001302.1_cds_CBF73413.1_1344	0.361204	0.4404	0.217714	0.370521
lcl|BN001302.1_cds_CBF73415.1_1345	0.389466	0.493251	0.22867	0.387951
lcl|BN001302.1_cds_CBF73417.1_1346	0.361425	0.469922	0.248955	0.364092
lcl|BN001302.1_cds_CBF73419.1_1347	0.373442	0.506388	0.241623	0.370581
lcl|BN001302.1_cds_CBF73421.1_1348	0.373784	0.482124	0.212098	0.379253
lcl|BN001302.1_cds_CBF73423.1_1349	0.382153	0.527839	0.223403	0.391444
lcl|BN001302.1_cds_CBF73424.1_1350	0.381012	0.516155	0.210232	0.394642
lcl|BN001302.1_cds_CBF73426.1_1351	0.353356	0.44049	0.22751	0.35104
lcl|BN001302.1_cds_CBF73428.1_1352	0.366334	0.486502	0.264963	0.362166
lcl|BN001302.1_cds_CBF73430.1_1353	0.328598	0.401628	0.203997	0.342407
lcl|BN001302.1_cds_CBF73431.1_1354	0.41195	0.557282	0.254684	0.405879
lcl|BN001302.1_cds_CBF73433.1_1355	0.358918	0.452852	0.236939	0.370091
lcl|BN001302.1_cds_CBF73435.1_1356	0.3713	0.443137	0.244003	0.367132
lcl|BN001302.1_cds_CBF73436.1_1357	0.389527	0.50333	0.22197	0.397307
lcl|BN001302.1_cds_CBF73438.1_1358	0.380292	0.472478	0.250815	0.386185
lcl|BN001302.1_cds_CBF73440.1_1359	0.349589	0.42876	0.249074	0.356623
lcl|BN001302.1_cds_CBF73441.1_1360	0.387235	0.48728	0.242148	0.386213
lcl|BN001302.1_cds_CBF73444.1_1361	0.393921	0.508254	0.246333	0.394617
lcl|BN001302.1_cds_CBF73446.1_1362	0.38975	0.508892	0.223808	0.394176
lcl|BN001302.1_cds_CBF73447.1_1363	0.38048	0.467033	0.238069	0.378559
lcl|BN001302.1_cds_CBF73449.1_1364	0.346943	0.421927	0.228346	0.347033
lcl|BN001302.1_cds_CBF73451.1_1365	0.399445	0.492602	0.181623	0.403934
lcl|BN001302.1_cds_CBF73453.1_1366	0.381349	0.487238	0.22194	0.384181
lcl|BN001302.1_cds_CBF73455.1_1367	0.331408	0.377165	0.211678	0.357297
lcl|BN001302.1_cds_CBF73457.1_1368	0.34458	0.434428	0.211144	0.35766
lcl|BN001302.1_cds_CBF73459.1_1369	0.362075	0.451533	0.178785	0.380782
lcl|BN001302.1_cds_CBF73461.1_1370	0.354534	0.419869	0.179959	0.366837
lcl|BN001302.1_cds_CBF73463.1_1371	0.341971	0.399174	0.194616	0.358185
lcl|BN001302.1_cds_CBF73465.1_1372	0.420264	0.538808	0.197941	0.425883
lcl|BN001302.1_cds_CBF73467.1_1373	0.392438	0.520175	0.174912	0.401399
lcl|BN001302.1_cds_CBF73469.1_1374	0.420479	0.573647	0.233617	0.416103
lcl|BN001302.1_cds_CBF73471.1_1375	0.401629	0.533429	0.247281	0.404774
lcl|BN001302.1_cds_CBF73473.1_1376	0.373909	0.501843	0.249642	0.379788
lcl|BN001302.1_cds_CBF73475.1_1377	0.441459	0.610247	0.249851	0.4295
lcl|BN001302.1_cds_CBF73477.1_1378	0.32718	0.396383	0.220244	0.34478
lcl|BN001302.1_cds_CBF73479.1_1379	0.355782	0.459456	0.227214	0.362979
lcl|BN001302.1_cds_CBF73480.1_1380	0.379481	0.472477	0.240799	0.377758
lcl|BN001302.1_cds_CBF73482.1_1381	0.387569	0.475034	0.225537	0.383534
lcl|BN001302.1_cds_CBF73484.1_1382	0.410289	0.573005	0.217774	0.406512
lcl|BN001302.1_cds_CBF73486.1_1383	0.368982	0.478153	0.251135	0.369824
lcl|BN001302.1_cds_CBF73488.1_1384	0.390763	0.502275	0.210482	0.395468
lcl|BN001302.1_cds_CBF73490.1_1385	0.36733	0.453601	0.213768	0.373322
lcl|BN001302.1_cds_CBF73492.1_1386	0.354333	0.43373	0.212713	0.368003
lcl|BN001302.1_cds_CBF73494.1_1387	0.394132	0.513648	0.190758	0.40464
lcl|BN001302.1_cds_CBF73495.1_1388	0.335953	0.397702	0.202408	0.350138
lcl|BN001302.1_cds_CBF73497.1_1389	0.395045	0.506017	0.242965	0.392824
lcl|BN001302.1_cds_CBF73499.1_1390	0.370015	0.465534	0.231709	0.372062
lcl|BN001302.1_cds_CBF73501.1_1391	0.386769	0.520751	0.220423	0.392574
lcl|BN001302.1_cds_CBF73503.1_1392	0.374643	0.523079	0.243285	0.377108
lcl|BN001302.1_cds_CBF73505.1_1393	0.405466	0.545125	0.247156	0.399106
lcl|BN001302.1_cds_CBF73507.1_1394	0.42248	0.586048	0.257795	0.420435
lcl|BN001302.1_cds_CBF73509.1_1395	0.406372	0.560881	0.237972	0.400966
lcl|BN001302.1_cds_CBF73511.1_1396	0.372295	0.484937	0.240794	0.377162
lcl|BN001302.1_cds_CBF73513.1_1397	0.441935	0.600213	0.231765	0.433069
lcl|BN001302.1_cds_CBF73514.1_1398	0.437069	0.61564	0.221573	0.437203
lcl|BN001302.1_cds_CBF73516.1_1399	0.368685	0.472225	0.235245	0.372253
lcl|BN001302.1_cds_CBF73518.1_1400	0.376605	0.468472	0.251781	0.377416
lcl|BN001302.1_cds_CBF73520.1_1401	0.359847	0.462258	0.238823	0.369253
lcl|BN001302.1_cds_CBF73522.1_1402	0.356758	0.438124	0.229317	0.36324
lcl|BN001302.1_cds_CBF73524.1_1403	0.391835	0.512648	0.279817	0.387263
lcl|BN001302.1_cds_CBF73526.1_1404	0.370875	0.498854	0.23649	0.370177
lcl|BN001302.1_cds_CBF73528.1_1405	0.375347	0.52157	0.27309	0.370362
lcl|BN001302.1_cds_CBF73530.1_1406	0.377574	0.509898	0.244662	0.3774
lcl|BN001302.1_cds_CBF73532.1_1407	0.365418	0.469927	0.257868	0.361475
lcl|BN001302.1_cds_CBF73534.1_1408	0.364094	0.455572	0.242777	0.374036
lcl|BN001302.1_cds_CBF73535.1_1409	0.361749	0.451955	0.241208	0.360802
lcl|BN001302.1_cds_CBF73537.1_1410	0.375877	0.468439	0.221316	0.381807
lcl|BN001302.1_cds_CBF73541.1_1412	0.364629	0.454124	0.25652	0.365499
lcl|BN001302.1_cds_CBF73543.1_1413	0.355726	0.457203	0.215014	0.36927
lcl|BN001302.1_cds_CBF73545.1_1414	0.373079	0.473317	0.223935	0.383496
lcl|BN001302.1_cds_CBF73547.1_1415	0.370229	0.444043	0.244355	0.374339
lcl|BN001302.1_cds_CBF73549.1_1416	0.370471	0.470581	0.233467	0.37449
lcl|BN001302.1_cds_CBF73551.1_1417	0.38572	0.532116	0.283536	0.386123
lcl|BN001302.1_cds_CBF73553.1_1418	0.379461	0.4969	0.218542	0.383399
lcl|BN001302.1_cds_CBF73555.1_1419	0.342673	0.419269	0.205211	0.355176
lcl|BN001302.1_cds_CBF73556.1_1420	0.361074	0.458291	0.218195	0.363838
lcl|BN001302.1_cds_CBF73558.1_1421	0.516539	0.737517	0.22736	0.516814
lcl|BN001302.1_cds_CBF73560.1_1422	0.415676	0.551323	0.231818	0.419697
lcl|BN001302.1_cds_CBF73562.1_1423	0.368206	0.484462	0.251296	0.375784
lcl|BN001302.1_cds_CBF73564.1_1424	0.366703	0.448624	0.223721	0.375657
lcl|BN001302.1_cds_CBF73566.1_1425	0.368396	0.512568	0.242596	0.366228
lcl|BN001302.1_cds_CBF73568.1_1426	0.370321	0.484269	0.238484	0.371985
lcl|BN001302.1_cds_CBF73570.1_1427	0.37326	0.477841	0.230642	0.380795
lcl|BN001302.1_cds_CBF73572.1_1428	0.34828	0.367385	0.217421	0.35561
lcl|BN001302.1_cds_CBF73574.1_1429	0.36307	0.438498	0.243937	0.370882
lcl|BN001302.1_cds_CBF73576.1_1430	0.402462	0.522006	0.26327	0.39269
lcl|BN001302.1_cds_CBF73577.1_1431	0.388107	0.513976	0.207349	0.399014
lcl|BN001302.1_cds_CBF73579.1_1432	0.371584	0.47335	0.214758	0.379045
lcl|BN001302.1_cds_CBF73581.1_1433	0.409428	0.558547	0.239695	0.408085
lcl|BN001302.1_cds_CBF73583.1_1434	0.514839	0.779891	0.220071	0.490642
lcl|BN001302.1_cds_CBF73584.1_1435	0.345644	0.428964	0.207916	0.356397
lcl|BN001302.1_cds_CBF73586.1_1436	0.3756	0.440161	0.215806	0.381767
lcl|BN001302.1_cds_CBF73588.1_1437	0.372019	0.45651	0.238104	0.383139
lcl|BN001302.1_cds_CBF73590.1_1438	0.356366	0.4513	0.228369	0.365667
lcl|BN001302.1_cds_CBF73592.1_1439	0.34052	0.423854	0.239609	0.345381
lcl|BN001302.1_cds_CBF73594.1_1440	0.36875	0.472906	0.211952	0.374164
lcl|BN001302.1_cds_CBF73596.1_1441	0.406699	0.523432	0.217034	0.402713
lcl|BN001302.1_cds_CBF73597.1_1442	0.35452	0.437043	0.230462	0.363143
lcl|BN001302.1_cds_CBF73599.1_1443	0.376256	0.481067	0.253116	0.380414
lcl|BN001302.1_cds_CBF73601.1_1444	0.464756	0.633761	0.285366	0.447362
lcl|BN001302.1_cds_CBF73603.1_1445	0.40296	0.514271	0.236833	0.392811
lcl|BN001302.1_cds_CBF73605.1_1446	0.468818	0.684271	0.205091	0.456521
lcl|BN001302.1_cds_CBF73607.1_1447	0.316533	0.368078	0.23272	0.341529
lcl|BN001302.1_cds_CBF73609.1_1448	0.356137	0.425646	0.217894	0.364772
lcl|BN001302.1_cds_CBF73611.1_1449	0.327206	0.408672	0.201521	0.33953
lcl|BN001302.1_cds_CBF73612.1_1450	0.371226	0.499567	0.204798	0.385922
lcl|BN001302.1_cds_CBF73614.1_1451	0.36508	0.46931	0.214137	0.373526
lcl|BN001302.1_cds_CBF73616.1_1452	0.41328	0.476518	0.163988	0.427201
lcl|BN001302.1_cds_CBF73618.1_1453	0.366521	0.454966	0.215479	0.379204
lcl|BN001302.1_cds_CBF73620.1_1454	0.381233	0.494439	0.217111	0.395165
lcl|BN001302.1_cds_CBF73621.1_1455	0.352569	0.421735	0.196825	0.362857
lcl|BN001302.1_cds_CBF73623.1_1456	0.377319	0.469175	0.221931	0.374892
lcl|BN001302.1_cds_CBF73625.1_1457	0.327884	0.405524	0.205689	0.336006
lcl|BN001302.1_cds_CBF73627.1_1458	0.336624	0.400456	0.189314	0.353569
lcl|BN001302.1_cds_CBF73629.1_1459	0.334763	0.400163	0.187985	0.345856
lcl|BN001302.1_cds_CBF73631.1_1460	0.326872	0.384289	0.184119	0.346557
lcl|BN001302.1_cds_CBF73633.1_1461	0.344952	0.40972	0.203702	0.361486
lcl|BN001302.1_cds_CBF73635.1_1462	0.364663	0.432059	0.225874	0.363145
lcl|BN001302.1_cds_CBF73637.1_1463	0.348394	0.382325	0.221426	0.344156
lcl|BN001302.1_cds_CBF73639.1_1464	0.35605	0.440587	0.222251	0.365589
lcl|BN001302.1_cds_CBF73641.1_1465	0.372114	0.482946	0.206675	0.389654
lcl|BN001302.1_cds_CBF73643.1_1466	0.358801	0.403832	0.186786	0.371609
lcl|BN001302.1_cds_CBF73644.1_1467	0.354607	0.437584	0.207085	0.363192
lcl|BN001302.1_cds_CBF73646.1_1468	0.36933	0.447268	0.22764	0.374484
lcl|BN001302.1_cds_CBF73648.1_1469	0.341356	0.4314	0.215856	0.350678
lcl|BN001302.1_cds_CBF73650.1_1470	0.367013	0.441945	0.21331	0.373515
lcl|BN001302.1_cds_CBF73652.1_1471	0.356235	0.44147	0.238986	0.357735
lcl|BN001302.1_cds_CBF73654.1_1472	0.354521	0.427562	0.21346	0.363653
lcl|BN001302.1_cds_CBF73656.1_1473	0.380152	0.5074	0.220329	0.390676
lcl|BN001302.1_cds_CBF73658.1_1474	0.372427	0.465384	0.258822	0.37352
lcl|BN001302.1_cds_CBF73660.1_1475	0.403369	0.522505	0.246965	0.404413
lcl|BN001302.1_cds_CBF73662.1_1476	0.397326	0.541548	0.215093	0.409819
lcl|BN001302.1_cds_CBF73663.1_1477	0.327564	0.409942	0.202676	0.3374
lcl|BN001302.1_cds_CBF73665.1_1478	0.462125	0.666744	0.258283	0.463975
lcl|BN001302.1_cds_CBF73667.1_1479	0.359574	0.425831	0.218252	0.367146
lcl|BN001302.1_cds_CBF73669.1_1480	0.404184	0.523607	0.216382	0.401277
lcl|BN001302.1_cds_CBF73671.1_1481	0.388067	0.452104	0.239703	0.394231
lcl|BN001302.1_cds_CBF73672.1_1482	0.404912	0.514868	0.223372	0.403629
lcl|BN001302.1_cds_CBF73674.1_1483	0.377915	0.449587	0.233042	0.379151
lcl|BN001302.1_cds_CBF73676.1_1484	0.360062	0.439283	0.209046	0.366792
lcl|BN001302.1_cds_CBF73678.1_1485	0.410256	0.505171	0.244187	0.404344
lcl|BN001302.1_cds_CBF73680.1_1486	0.373276	0.4699	0.222619	0.381953
lcl|BN001302.1_cds_CBF73682.1_1488	0.375977	0.439865	0.289375	0.381421
lcl|BN001302.1_cds_CBF73684.1_1489	0.349228	0.424001	0.2149	0.357615
lcl|BN001302.1_cds_CBF73686.1_1490	0.352263	0.435389	0.235357	0.359774
lcl|BN001302.1_cds_CBF73688.1_1491	0.400025	0.530206	0.247935	0.398436
lcl|BN001302.1_cds_CBF73690.1_1492	0.35387	0.433524	0.246683	0.358673
lcl|BN001302.1_cds_CBF73692.1_1493	0.492191	0.756056	0.242653	0.465766
lcl|BN001302.1_cds_CBF73694.1_1494	0.402227	0.564213	0.260532	0.403594
lcl|BN001302.1_cds_CBF73696.1_1495	0.341903	0.41651	0.231024	0.34994
lcl|BN001302.1_cds_CBF73697.1_1496	0.487218	0.66729	0.242726	0.47837
lcl|BN001302.1_cds_CBF73699.1_1497	0.39345	0.502949	0.206255	0.404092
lcl|BN001302.1_cds_CBF73701.1_1498	0.361958	0.44856	0.187657	0.379557
lcl|BN001302.1_cds_CBF73703.1_1499	0.481259	0.701064	0.250438	0.469625
lcl|BN001302.1_cds_CBF73705.1_1500	0.364456	0.452618	0.237815	0.366459
lcl|BN001302.1_cds_CBF73707.1_1501	0.336276	0.393999	0.219079	0.343257
lcl|BN001302.1_cds_CBF73709.1_1502	0.378911	0.444938	0.216136	0.393074
lcl|BN001302.1_cds_CBF73711.1_1503	0.427968	0.5545	0.204354	0.426724
lcl|BN001302.1_cds_CBF73713.1_1504	0.359024	0.467437	0.211971	0.365853
lcl|BN001302.1_cds_CBF73715.1_1505	0.380247	0.476612	0.235113	0.381646
lcl|BN001302.1_cds_CBF73717.1_1506	0.332902	0.374974	0.179865	0.353587
lcl|BN001302.1_cds_CBF73719.1_1507	0.358476	0.418484	0.223124	0.364482
lcl|BN001302.1_cds_CBF73720.1_1508	0.440653	0.585466	0.204469	0.44265
lcl|BN001302.1_cds_CBF73722.1_1509	0.429757	0.560716	0.254204	0.433649
lcl|BN001302.1_cds_CBF73724.1_1510	0.441838	0.595949	0.232175	0.435545
lcl|BN001302.1_cds_CBF73726.1_1511	0.383649	0.482478	0.233658	0.38555
lcl|BN001302.1_cds_CBF73728.1_1512	0.351026	0.410772	0.22474	0.362934
lcl|BN001302.1_cds_CBF73730.1_1513	0.384495	0.503672	0.229058	0.383581
lcl|BN001302.1_cds_CBF73731.1_1514	0.357943	0.454278	0.228969	0.359359
lcl|BN001302.1_cds_CBF73733.1_1515	0.405604	0.531763	0.282824	0.403984
lcl|BN001302.1_cds_CBF73735.1_1516	0.379957	0.488977	0.232356	0.381382
lcl|BN001302.1_cds_CBF73737.1_1517	0.351786	0.413429	0.21693	0.36349
lcl|BN001302.1_cds_CBF73739.1_1518	0.34207	0.404435	0.217664	0.34854
lcl|BN001302.1_cds_CBF73741.1_1519	0.406366	0.507976	0.227928	0.4102
lcl|BN001302.1_cds_CBF73743.1_1520	0.402691	0.534128	0.218811	0.409753
lcl|BN001302.1_cds_CBF73745.1_1521	0.372101	0.45726	0.217371	0.380183
lcl|BN001302.1_cds_CBF73747.1_1522	0.358182	0.447152	0.243303	0.354553
lcl|BN001302.1_cds_CBF73749.1_1523	0.361052	0.455558	0.203939	0.372768
lcl|BN001302.1_cds_CBF73751.1_1524	0.362895	0.450281	0.22412	0.368741
lcl|BN001302.1_cds_CBF73752.1_1525	0.366192	0.431736	0.176599	0.367335
lcl|BN001302.1_cds_CBF73754.1_1526	0.394099	0.517074	0.198366	0.401397
lcl|BN001302.1_cds_CBF73756.1_1527	0.45431	0.559046	0.212733	0.448746
lcl|BN001302.1_cds_CBF73758.1_1528	0.482962	0.662034	0.230198	0.479933
lcl|BN001302.1_cds_CBF73760.1_1529	0.564478	0.847295	0.216016	0.537034
lcl|BN001302.1_cds_CBF73762.1_1530	0.359176	0.434124	0.195438	0.37344
lcl|BN001302.1_cds_CBF73764.1_1531	0.386487	0.532401	0.216682	0.390289
lcl|BN001302.1_cds_CBF73765.1_1532	0.411562	0.541661	0.229752	0.415989
lcl|BN001302.1_cds_CBF73767.1_1533	0.382436	0.49334	0.22212	0.394312
lcl|BN001302.1_cds_CBF73769.1_1534	0.308336	0.335837	0.241053	0.323318
lcl|BN001302.1_cds_CBF73771.1_1535	0.367974	0.455168	0.218977	0.373319
lcl|BN001302.1_cds_CBF73773.1_1536	0.357582	0.492754	0.229782	0.372269
lcl|BN001302.1_cds_CBF73775.1_1537	0.391157	0.466621	0.242777	0.384643
lcl|BN001302.1_cds_CBF73777.1_1538	0.344736	0.394348	0.212751	0.349408
lcl|BN001302.1_cds_CBF73778.1_1539	0.446281	0.595369	0.217366	0.441122
lcl|BN001302.1_cds_CBF73780.1_1540	0.402577	0.497853	0.237485	0.405931
lcl|BN001302.1_cds_CBF73782.1_1541	0.355079	0.462055	0.218193	0.372927
lcl|BN001302.1_cds_CBF73784.1_1542	0.372018	0.499086	0.233012	0.369721
lcl|BN001302.1_cds_CBF73786.1_1543	0.329441	0.394544	0.199221	0.345802
lcl|BN001302.1_cds_CBF73788.1_1544	0.337671	0.417353	0.21311	0.348037
lcl|BN001302.1_cds_CBF73790.1_1545	0.347137	0.468156	0.25261	0.351891
lcl|BN001302.1_cds_CBF73792.1_1546	0.398987	0.494689	0.231567	0.39625
lcl|BN001302.1_cds_CBF73793.1_1547	0.293376	0.346898	0.234143	0.299937
lcl|BN001302.1_cds_CBF73795.1_1548	0.39567	0.542404	0.203937	0.399467
lcl|BN001302.1_cds_CBF73797.1_1549	0.380671	0.468898	0.214594	0.38474
lcl|BN001302.1_cds_CBF73799.1_1550	0.420446	0.539779	0.208499	0.428512
lcl|BN001302.1_cds_CBF73801.1_1551	0.340596	0.393632	0.217806	0.355092
lcl|BN001302.1_cds_CBF73803.1_1552	0.409355	0.55853	0.249273	0.41313
lcl|BN001302.1_cds_CBF73805.1_1553	0.417868	0.545615	0.236245	0.423644
lcl|BN001302.1_cds_CBF73806.1_1554	0.373395	0.45386	0.249346	0.375312
lcl|BN001302.1_cds_CBF73808.1_1555	0.330956	0.393678	0.214669	0.344657
lcl|BN001302.1_cds_CBF73809.1_1556	0.412781	0.56389	0.212695	0.411109
lcl|BN001302.1_cds_CBF73811.1_1557	0.370499	0.458741	0.217967	0.37641
lcl|BN001302.1_cds_CBF73813.1_1558	0.404684	0.52083	0.215995	0.407799
lcl|BN001302.1_cds_CBF73815.1_1559	0.361749	0.427467	0.229146	0.365313
lcl|BN001302.1_cds_CBF73817.1_1560	0.340858	0.422253	0.206568	0.352119
lcl|BN001302.1_cds_CBF73818.1_1561	0.374958	0.48299	0.180414	0.385018
lcl|BN001302.1_cds_CBF73820.1_1562	0.348337	0.425551	0.217946	0.352142
lcl|BN001302.1_cds_CBF73822.1_1563	0.338146	0.422332	0.198112	0.353018
lcl|BN001302.1_cds_CBF73824.1_1564	0.365554	0.451159	0.190539	0.380958
lcl|BN001302.1_cds_CBF73826.1_1565	0.376853	0.44729	0.22905	0.378967
lcl|BN001302.1_cds_CBF73828.1_1566	0.433244	0.568984	0.238652	0.434241
lcl|BN001302.1_cds_CBF73830.1_1567	0.393809	0.509089	0.212043	0.399792
lcl|BN001302.1_cds_CBF73832.1_1568	0.400421	0.488828	0.196199	0.409809
lcl|BN001302.1_cds_CBF73833.1_1569	0.352652	0.421242	0.2031	0.362617
lcl|BN001302.1_cds_CBF73835.1_1570	0.403691	0.524466	0.235666	0.403321
lcl|BN001302.1_cds_CBF73838.1_1571	0.407643	0.531247	0.240741	0.404426
lcl|BN001302.1_cds_CBF73839.1_1572	0.353826	0.436506	0.235516	0.363237
lcl|BN001302.1_cds_CBF73841.1_1573	0.431562	0.610128	0.217321	0.433847
lcl|BN001302.1_cds_CBF73843.1_1574	0.357311	0.48037	0.20515	0.361598
lcl|BN001302.1_cds_CBF73845.1_1575	0.407979	0.572482	0.227846	0.407432
lcl|BN001302.1_cds_CBF73847.1_1576	0.408525	0.511656	0.254978	0.407141
lcl|BN001302.1_cds_CBF73848.1_1577	0.348984	0.441454	0.28252	0.353136
lcl|BN001302.1_cds_CBF73850.1_1578	0.359378	0.457725	0.238126	0.365632
lcl|BN001302.1_cds_CBF73852.1_1579	0.390448	0.508523	0.249497	0.388024
lcl|BN001302.1_cds_CBF73854.1_1580	0.349556	0.40768	0.179807	0.368852
lcl|BN001302.1_cds_CBF73856.1_1581	0.457258	0.659852	0.221141	0.448436
lcl|BN001302.1_cds_CBF73858.1_1582	0.314208	0.336529	0.20679	0.328917
lcl|BN001302.1_cds_CBF73860.1_1583	0.352489	0.429914	0.226888	0.359569
lcl|BN001302.1_cds_CBF73862.1_1584	0.336446	0.402533	0.221687	0.341471
lcl|BN001302.1_cds_CBF73864.1_1585	0.36554	0.505953	0.210853	0.387924
lcl|BN001302.1_cds_CBF73866.1_1586	0.338219	0.422335	0.211514	0.353934
lcl|BN001302.1_cds_CBF73868.1_1587	0.342111	0.405551	0.204512	0.356187
lcl|BN001302.1_cds_CBF73870.1_1588	0.376862	0.462779	0.217349	0.383129
lcl|BN001302.1_cds_CBF73871.1_1589	0.384285	0.512653	0.201069	0.37929
lcl|BN001302.1_cds_CBF73873.1_1590	0.375905	0.467073	0.238144	0.370332
lcl|BN001302.1_cds_CBF73875.1_1591	0.373256	0.437482	0.238608	0.378084
lcl|BN001302.1_cds_CBF73876.1_1592	0.388515	0.51424	0.272472	0.387088
lcl|BN001302.1_cds_CBF73878.1_1593	0.29892	0.328935	0.179476	0.31951
lcl|BN001302.1_cds_CBF73880.1_1594	0.369018	0.459039	0.222522	0.377746
lcl|BN001302.1_cds_CBF73882.1_1595	0.368144	0.472202	0.172328	0.381215
lcl|BN001302.1_cds_CBF73884.1_1596	0.356112	0.479351	0.238236	0.360015
lcl|BN001302.1_cds_CBF73885.1_1597	0.364739	0.48159	0.244675	0.368155
lcl|BN001302.1_cds_CBF73887.1_1598	0.394184	0.528074	0.231972	0.395702
lcl|BN001302.1_cds_CBF73888.1_1599	0.361834	0.451307	0.221461	0.362679
lcl|BN001302.1_cds_CBF73890.1_1600	0.347946	0.451927	0.230266	0.352794
lcl|BN001302.1_cds_CBF73891.1_1601	0.432738	0.606354	0.275868	0.424664
lcl|BN001302.1_cds_CBF73893.1_1602	0.365365	0.470284	0.241163	0.365791
lcl|BN001302.1_cds_CBF73895.1_1603	0.377273	0.469496	0.259116	0.37408
lcl|BN001302.1_cds_CBF73897.1_1604	0.350106	0.420579	0.215801	0.359043
lcl|BN001302.1_cds_CBF73898.1_1605	0.364868	0.470797	0.229856	0.373296
lcl|BN001302.1_cds_CBF73900.1_1606	0.358425	0.423385	0.214079	0.36079
lcl|BN001302.1_cds_CBF73902.1_1607	0.362622	0.453432	0.229294	0.365604
lcl|BN001302.1_cds_CBF73904.1_1608	0.360074	0.452965	0.213288	0.369602
lcl|BN001302.1_cds_CBF73906.1_1609	0.355423	0.431354	0.256243	0.355826
lcl|BN001302.1_cds_CBF73908.1_1610	0.363699	0.452353	0.22521	0.370851
lcl|BN001302.1_cds_CBF73910.1_1611	0.355842	0.450988	0.232771	0.363218
lcl|BN001302.1_cds_CBF73911.1_1612	0.363099	0.470946	0.245384	0.359966
lcl|BN001302.1_cds_CBF73913.1_1613	0.389832	0.494091	0.240298	0.394557
lcl|BN001302.1_cds_CBF73915.1_1614	0.368963	0.477621	0.244468	0.372039
lcl|BN001302.1_cds_CBF73917.1_1615	0.359383	0.439727	0.198192	0.370999
lcl|BN001302.1_cds_CBF73919.1_1616	0.39188	0.56893	0.28102	0.379804
lcl|BN001302.1_cds_CBF73921.1_1617	0.482057	0.684118	0.229635	0.46664
lcl|BN001302.1_cds_CBF73923.1_1618	0.519059	0.750333	0.22939	0.491884
lcl|BN001302.1_cds_CBF73924.1_1619	0.407452	0.571022	0.228305	0.417562
lcl|BN001302.1_cds_CBF73926.1_1620	0.352038	0.427498	0.215063	0.357723
lcl|BN001302.1_cds_CBF73928.1_1621	0.453515	0.633663	0.218197	0.447594
lcl|BN001302.1_cds_CBF73930.1_1622	0.412734	0.549954	0.220473	0.410546
lcl|BN001302.1_cds_CBF73932.1_1623	0.389198	0.491508	0.240935	0.39733
lcl|BN001302.1_cds_CBF73933.1_1624	0.403344	0.554331	0.231132	0.400942
lcl|BN001302.1_cds_CBF73935.1_1625	0.368777	0.469254	0.231973	0.372674
lcl|BN001302.1_cds_CBF73937.1_1626	0.362014	0.434583	0.237808	0.364352
lcl|BN001302.1_cds_CBF73938.1_1627	0.373457	0.467861	0.258488	0.370686
lcl|BN001302.1_cds_CBF73940.1_1628	0.398213	0.534913	0.255003	0.393295
lcl|BN001302.1_cds_CBF73942.1_1629	0.370727	0.460667	0.21822	0.373679
lcl|BN001302.1_cds_CBF73944.1_1630	0.341001	0.416054	0.21683	0.350693
lcl|BN001302.1_cds_CBF73945.1_1631	0.416999	0.514473	0.200837	0.423574
lcl|BN001302.1_cds_CBF73947.1_1632	0.348643	0.4075	0.213424	0.361687
lcl|BN001302.1_cds_CBF73949.1_1633	0.356664	0.449421	0.216759	0.365478
lcl|BN001302.1_cds_CBF73951.1_1634	0.361873	0.433831	0.208954	0.371159
lcl|BN001302.1_cds_CBF73952.1_1635	0.397076	0.524325	0.234202	0.393845
lcl|BN001302.1_cds_CBF73954.1_1636	0.384775	0.496738	0.248979	0.385663
lcl|BN001302.1_cds_CBF73955.1_1637	0.400706	0.533086	0.240973	0.395306
lcl|BN001302.1_cds_CBF73957.1_1638	0.395351	0.519613	0.261431	0.388692
lcl|BN001302.1_cds_CBF73959.1_1639	0.377578	0.508437	0.199751	0.393545
lcl|BN001302.1_cds_CBF73961.1_1640	0.399271	0.544038	0.251756	0.400115
lcl|BN001302.1_cds_CBF73963.1_1641	0.373121	0.465323	0.248901	0.373646
lcl|BN001302.1_cds_CBF73965.1_1642	0.341455	0.423765	0.217354	0.350858
lcl|BN001302.1_cds_CBF73967.1_1643	0.383461	0.463181	0.216017	0.39019
lcl|BN001302.1_cds_CBF73969.1_1644	0.347124	0.431757	0.241608	0.346196
lcl|BN001302.1_cds_CBF73971.1_1645	0.376534	0.47161	0.227998	0.385969
lcl|BN001302.1_cds_CBF73972.1_1646	0.339692	0.425834	0.248361	0.342124
lcl|BN001302.1_cds_CBF73974.1_1647	0.382376	0.541695	0.284078	0.385819
lcl|BN001302.1_cds_CBF73976.1_1648	0.378914	0.500314	0.261982	0.374543
lcl|BN001302.1_cds_CBF73978.1_1649	0.354364	0.441682	0.215386	0.359627
lcl|BN001302.1_cds_CBF73979.1_1650	0.342177	0.412525	0.227631	0.343918
lcl|BN001302.1_cds_CBF73981.1_1651	0.359403	0.452545	0.239068	0.368445
lcl|BN001302.1_cds_CBF73982.1_1652	0.358423	0.436729	0.216324	0.361867
lcl|BN001302.1_cds_CBF73984.1_1653	0.377135	0.493071	0.260868	0.369907
lcl|BN001302.1_cds_CBF73986.1_1654	0.39523	0.5195	0.231395	0.396862
lcl|BN001302.1_cds_CBF73988.1_1655	0.373506	0.44218	0.195843	0.398263
lcl|BN001302.1_cds_CBF73989.1_1656	0.363423	0.438416	0.220388	0.373393
lcl|BN001302.1_cds_CBF73991.1_1657	0.396673	0.55001	0.230921	0.394894
lcl|BN001302.1_cds_CBF73993.1_1658	0.369525	0.435285	0.237914	0.367468
lcl|BN001302.1_cds_CBF73995.1_1659	0.406789	0.513456	0.242429	0.397839
lcl|BN001302.1_cds_CBF73997.1_1660	0.32975	0.380916	0.187331	0.35027
lcl|BN001302.1_cds_CBF73999.1_1661	0.340467	0.398972	0.233473	0.348844
lcl|BN001302.1_cds_CBF74000.1_1662	0.380476	0.457425	0.22148	0.38171
lcl|BN001302.1_cds_CBF74002.1_1663	0.302345	0.427865	0.154658	0.323642
lcl|BN001302.1_cds_CBF74004.1_1664	0.344287	0.402945	0.198681	0.363882
lcl|BN001302.1_cds_CBF74006.1_1665	0.310871	0.337485	0.172412	0.329376
lcl|BN001302.1_cds_CBF74008.1_1666	0.307607	0.297858	0.159247	0.318218
lcl|BN001302.1_cds_CBF74009.1_1667	0.333319	0.391908	0.21001	0.34938
lcl|BN001302.1_cds_CBF74011.1_1668	0.348545	0.422804	0.227254	0.355968
lcl|BN001302.1_cds_CBF74013.1_1669	0.362518	0.439167	0.196677	0.374865
lcl|BN001302.1_cds_CBF74015.1_1670	0.389572	0.482458	0.217417	0.400303
lcl|BN001302.1_cds_CBF74017.1_1671	0.367686	0.459159	0.225412	0.374461
lcl|BN001302.1_cds_CBF74019.1_1672	0.372574	0.455773	0.223744	0.38074
lcl|BN001302.1_cds_CBF74021.1_1673	0.363486	0.482401	0.240967	0.363373
lcl|BN001302.1_cds_CBF74023.1_1674	0.480852	0.710975	0.238166	0.463505
lcl|BN001302.1_cds_CBF74025.1_1675	0.419589	0.565294	0.267974	0.41193
lcl|BN001302.1_cds_CBF74027.1_1676	0.382086	0.498923	0.261931	0.382287
lcl|BN001302.1_cds_CBF74028.1_1677	0.469598	0.631052	0.23072	0.474574
lcl|BN001302.1_cds_CBF74030.1_1678	0.358399	0.434798	0.204107	0.367251
lcl|BN001302.1_cds_CBF74032.1_1679	0.371197	0.465035	0.224202	0.379563
lcl|BN001302.1_cds_CBF74034.1_1680	0.340746	0.390143	0.216074	0.352211
lcl|BN001302.1_cds_CBF74035.1_1681	0.349523	0.410994	0.19811	0.359096
lcl|BN001302.1_cds_CBF74037.1_1682	0.431688	0.585376	0.210977	0.426743
lcl|BN001302.1_cds_CBF74039.1_1683	0.551295	0.828075	0.211596	0.519267
lcl|BN001302.1_cds_CBF74041.1_1684	0.401632	0.495581	0.179581	0.415697
lcl|BN001302.1_cds_CBF74043.1_1685	0.358025	0.462113	0.224453	0.366765
lcl|BN001302.1_cds_CBF74045.1_1686	0.344881	0.416131	0.215449	0.350798
lcl|BN001302.1_cds_CBF74046.1_1687	0.361933	0.468312	0.216309	0.365977
lcl|BN001302.1_cds_CBF74048.1_1688	0.364016	0.424949	0.221976	0.370606
lcl|BN001302.1_cds_CBF74050.1_1689	0.388376	0.474896	0.239566	0.394947
lcl|BN001302.1_cds_CBF74052.1_1690	0.372181	0.470325	0.207492	0.371306
lcl|BN001302.1_cds_CBF74054.1_1691	0.455121	0.598736	0.225797	0.448704
lcl|BN001302.1_cds_CBF74056.1_1692	0.364095	0.476252	0.191022	0.375176
lcl|BN001302.1_cds_CBF74058.1_1693	0.418586	0.56527	0.188896	0.422518
lcl|BN001302.1_cds_CBF74060.1_1694	0.345767	0.430662	0.208926	0.360669
lcl|BN001302.1_cds_CBF74062.1_1695	0.377168	0.455569	0.203916	0.390552
lcl|BN001302.1_cds_CBF74064.1_1696	0.371941	0.417362	0.178683	0.382347
lcl|BN001302.1_cds_CBF74066.1_1697	0.394351	0.492321	0.201239	0.405397
lcl|BN001302.1_cds_CBF74068.1_1698	0.397953	0.513203	0.220973	0.397735
lcl|BN001302.1_cds_CBF74069.1_1699	0.356921	0.435465	0.179856	0.373697
lcl|BN001302.1_cds_CBF74071.1_1700	0.33118	0.391067	0.190543	0.346538
lcl|BN001302.1_cds_CBF74073.1_1701	0.384798	0.509296	0.204199	0.394111
lcl|BN001302.1_cds_CBF74074.1_1702	0.347224	0.41475	0.210908	0.355508
lcl|BN001302.1_cds_CBF74076.1_1703	0.328572	0.371595	0.212171	0.34448
lcl|BN001302.1_cds_CBF74078.1_1704	0.356974	0.460367	0.247968	0.361039
lcl|BN001302.1_cds_CBF74079.1_1705	0.320087	0.368232	0.227787	0.330466
lcl|BN001302.1_cds_CBF74081.1_1706	0.42554	0.578385	0.250287	0.416839
lcl|BN001302.1_cds_CBF74083.1_1707	0.413902	0.501993	0.205166	0.411176
lcl|BN001302.1_cds_CBF74085.1_1708	0.421138	0.567033	0.220469	0.421672
lcl|BN001302.1_cds_CBF74087.1_1709	0.393137	0.530106	0.221472	0.387439
lcl|BN001302.1_cds_CBF74089.1_1710	0.336843	0.431815	0.244936	0.343638
lcl|BN001302.1_cds_CBF74091.1_1711	0.34924	0.439168	0.204811	0.357547
lcl|BN001302.1_cds_CBF74093.1_1712	0.392799	0.500039	0.231747	0.401145
lcl|BN001302.1_cds_CBF74095.1_1713	0.37155	0.511642	0.203471	0.364596
lcl|BN001302.1_cds_CBF74097.1_1714	0.365426	0.461012	0.248555	0.369773
lcl|BN001302.1_cds_CBF74098.1_1715	0.371289	0.457226	0.219376	0.382215
lcl|BN001302.1_cds_CBF74100.1_1716	0.365369	0.472393	0.203194	0.379479
lcl|BN001302.1_cds_CBF74102.1_1717	0.376397	0.473425	0.215816	0.384806
lcl|BN001302.1_cds_CBF74104.1_1718	0.384297	0.489525	0.23779	0.384268
lcl|BN001302.1_cds_CBF74106.1_1719	0.346561	0.420856	0.193367	0.360562
lcl|BN001302.1_cds_CBF74108.1_1720	0.360644	0.439015	0.203469	0.371222
lcl|BN001302.1_cds_CBF74110.1_1721	0.35757	0.420786	0.246773	0.347096
lcl|BN001302.1_cds_CBF74112.1_1722	0.338659	0.394054	0.208444	0.347043
lcl|BN001302.1_cds_CBF74114.1_1723	0.356939	0.446408	0.203465	0.367346
lcl|BN001302.1_cds_CBF74116.1_1724	0.334715	0.403933	0.218394	0.342739
lcl|BN001302.1_cds_CBF74118.1_1725	0.360641	0.448439	0.204789	0.372529
lcl|BN001302.1_cds_CBF74120.1_1726	0.344601	0.415857	0.204851	0.363116
lcl|BN001302.1_cds_CBF74121.1_1727	0.372274	0.459929	0.216067	0.375635
lcl|BN001302.1_cds_CBF74123.1_1728	0.353821	0.452322	0.21281	0.359792
lcl|BN001302.1_cds_CBF74125.1_1729	0.397392	0.503185	0.202492	0.406058
lcl|BN001302.1_cds_CBF74127.1_1730	0.569006	0.869362	0.236453	0.535958
lcl|BN001302.1_cds_CBF74129.1_1731	0.385552	0.500153	0.216812	0.392965
lcl|BN001302.1_cds_CBF74131.1_1732	0.337642	0.392287	0.174752	0.349896
lcl|BN001302.1_cds_CBF74133.1_1733	0.378474	0.456482	0.248829	0.379444
lcl|BN001302.1_cds_CBF74135.1_1734	0.343184	0.435861	0.21972	0.358083
lcl|BN001302.1_cds_CBF74136.1_1735	0.391994	0.51745	0.217232	0.400424
lcl|BN001302.1_cds_CBF74138.1_1736	0.386363	0.475808	0.213485	0.394759
lcl|BN001302.1_cds_CBF74140.1_1737	0.335001	0.435592	0.223485	0.346007
lcl|BN001302.1_cds_CBF74142.1_1738	0.343699	0.43567	0.219788	0.355699
lcl|BN001302.1_cds_CBF74144.1_1739	0.344387	0.433546	0.204413	0.355345
lcl|BN001302.1_cds_CBF74146.1_1740	0.363485	0.432839	0.19289	0.382217
lcl|BN001302.1_cds_CBF74148.1_1741	0.467809	0.634392	0.215243	0.462786
lcl|BN001302.1_cds_CBF74149.1_1742	0.363299	0.440256	0.221802	0.370171
lcl|BN001302.1_cds_CBF74151.1_1743	0.344539	0.421928	0.243271	0.356696
lcl|BN001302.1_cds_CBF74153.1_1744	0.372757	0.474124	0.199067	0.379009
lcl|BN001302.1_cds_CBF74155.1_1745	0.357728	0.443739	0.218324	0.368161
lcl|BN001302.1_cds_CBF74156.1_1746	0.374802	0.474084	0.207851	0.38386
lcl|BN001302.1_cds_CBF74158.1_1747	0.392438	0.498138	0.232207	0.39411
lcl|BN001302.1_cds_CBF74160.1_1748	0.419055	0.554011	0.222683	0.415447
lcl|BN001302.1_cds_CBF74162.1_1749	0.322622	0.3716	0.233561	0.335696
lcl|BN001302.1_cds_CBF74163.1_1750	0.433797	0.599677	0.205435	0.440635
lcl|BN001302.1_cds_CBF74165.1_1751	0.384333	0.474833	0.222338	0.39001
lcl|BN001302.1_cds_CBF74167.1_1752	0.427241	0.547027	0.216847	0.426924
lcl|BN001302.1_cds_CBF74169.1_1753	0.407475	0.507951	0.213909	0.420829
lcl|BN001302.1_cds_CBF74171.1_1754	0.363986	0.454908	0.196443	0.372879
lcl|BN001302.1_cds_CBF74173.1_1755	0.352473	0.412664	0.233657	0.359843
lcl|BN001302.1_cds_CBF74175.1_1756	0.34542	0.435358	0.200532	0.361874
lcl|BN001302.1_cds_CBF74177.1_1757	0.370317	0.446955	0.256151	0.372402
lcl|BN001302.1_cds_CBF74178.1_1758	0.421607	0.549427	0.212935	0.443862
lcl|BN001302.1_cds_CBF74180.1_1759	0.360642	0.463046	0.240638	0.370797
lcl|BN001302.1_cds_CBF74182.1_1760	0.341825	0.438036	0.22669	0.34758
lcl|BN001302.1_cds_CBF74184.1_1761	0.356683	0.416259	0.238671	0.364991
lcl|BN001302.1_cds_CBF74186.1_1762	0.39966	0.565886	0.192601	0.393979
lcl|BN001302.1_cds_CBF74187.1_1763	0.349574	0.431508	0.253595	0.355244
lcl|BN001302.1_cds_CBF74189.1_1764	0.404551	0.538752	0.218517	0.408695
lcl|BN001302.1_cds_CBF74191.1_1765	0.330874	0.405823	0.20993	0.337631
lcl|BN001302.1_cds_CBF74193.1_1766	0.3761	0.462958	0.217882	0.381612
lcl|BN001302.1_cds_CBF74195.1_1767	0.366461	0.437732	0.21557	0.378308
lcl|BN001302.1_cds_CBF74197.1_1768	0.40223	0.532937	0.199167	0.403388
lcl|BN001302.1_cds_CBF74199.1_1769	0.409313	0.504075	0.225012	0.419445
lcl|BN001302.1_cds_CBF74201.1_1770	0.404502	0.487554	0.234113	0.409469
lcl|BN001302.1_cds_CBF74202.1_1771	0.383665	0.497376	0.20247	0.381223
lcl|BN001302.1_cds_CBF74204.1_1772	0.364308	0.446285	0.226514	0.372101
lcl|BN001302.1_cds_CBF74206.1_1773	0.362894	0.435829	0.235754	0.365082
lcl|BN001302.1_cds_CBF74208.1_1774	0.365642	0.477313	0.203509	0.37173
lcl|BN001302.1_cds_CBF74210.1_1775	0.385028	0.521379	0.237037	0.379003
lcl|BN001302.1_cds_CBF74212.1_1776	0.338592	0.414181	0.218912	0.349742
lcl|BN001302.1_cds_CBF74213.1_1777	0.423488	0.57189	0.210062	0.422922
lcl|BN001302.1_cds_CBF74215.1_1778	0.377983	0.471681	0.225059	0.384026
lcl|BN001302.1_cds_CBF74217.1_1779	0.452849	0.552501	0.185048	0.464731
lcl|BN001302.1_cds_CBF74219.1_1780	0.336785	0.385214	0.193133	0.348258
lcl|BN001302.1_cds_CBF74221.1_1781	0.394504	0.481916	0.251007	0.386723
lcl|BN001302.1_cds_CBF74223.1_1782	0.353577	0.435841	0.209354	0.362745
lcl|BN001302.1_cds_CBF74224.1_1783	0.341735	0.394686	0.21829	0.358041
lcl|BN001302.1_cds_CBF74226.1_1784	0.335912	0.379551	0.233746	0.339589
lcl|BN001302.1_cds_CBF74228.1_1785	0.368789	0.459337	0.215631	0.381449
lcl|BN001302.1_cds_CBF74230.1_1786	0.384076	0.463041	0.208001	0.38911
lcl|BN001302.1_cds_CBF74232.1_1787	0.35246	0.41151	0.21245	0.356006
lcl|BN001302.1_cds_CBF74234.1_1788	0.356807	0.450552	0.237874	0.363856
lcl|BN001302.1_cds_CBF74235.1_1789	0.340897	0.427191	0.212848	0.348326
lcl|BN001302.1_cds_CBF74237.1_1790	0.357324	0.418702	0.229069	0.36525
lcl|BN001302.1_cds_CBF74239.1_1791	0.360828	0.426468	0.246395	0.36651
lcl|BN001302.1_cds_CBF74241.1_1792	0.378513	0.505173	0.228404	0.379136
lcl|BN001302.1_cds_CBF74242.1_1793	0.347408	0.457198	0.249875	0.355555
lcl|BN001302.1_cds_CBF74244.1_1794	0.411472	0.516524	0.270017	0.396722
lcl|BN001302.1_cds_CBF74246.1_1795	0.45087	0.575438	0.183073	0.451406
lcl|BN001302.1_cds_CBF74248.1_1796	0.556078	0.807142	0.215418	0.54108
lcl|BN001302.1_cds_CBF74250.1_1797	0.346019	0.421551	0.196078	0.353852
lcl|BN001302.1_cds_CBF74252.1_1798	0.352774	0.43625	0.216445	0.36008
lcl|BN001302.1_cds_CBF74254.1_1799	0.372396	0.445093	0.219435	0.377075
lcl|BN001302.1_cds_CBF74256.1_1800	0.486479	0.692837	0.189521	0.478224
lcl|BN001302.1_cds_CBF74258.1_1801	0.439802	0.573848	0.22202	0.438582
lcl|BN001302.1_cds_CBF74260.1_1802	0.531381	0.770994	0.197537	0.519172
lcl|BN001302.1_cds_CBF74261.1_1803	0.376055	0.459823	0.201166	0.381665
lcl|BN001302.1_cds_CBF74263.1_1804	0.421731	0.552523	0.206861	0.423151
lcl|BN001302.1_cds_CBF74265.1_1805	0.36399	0.461192	0.184569	0.373535
lcl|BN001302.1_cds_CBF74267.1_1806	0.384669	0.506746	0.200369	0.39117
lcl|BN001302.1_cds_CBF74269.1_1807	0.403782	0.512947	0.192949	0.411256
lcl|BN001302.1_cds_CBF74271.1_1808	0.353596	0.449199	0.196086	0.374614
lcl|BN001302.1_cds_CBF74272.1_1809	0.341317	0.391458	0.201678	0.352934
lcl|BN001302.1_cds_CBF74274.1_1810	0.385795	0.489525	0.198789	0.393164
lcl|BN001302.1_cds_CBF74276.1_1811	0.349969	0.38917	0.218363	0.357705
lcl|BN001302.1_cds_CBF74278.1_1812	0.345916	0.413149	0.19961	0.363057
lcl|BN001302.1_cds_CBF74279.1_1813	0.344137	0.401721	0.202442	0.352124
lcl|BN001302.1_cds_CBF74281.1_1814	0.325047	0.370379	0.190804	0.339662
lcl|BN001302.1_cds_CBF74283.1_1815	0.346239	0.386451	0.200167	0.368378
lcl|BN001302.1_cds_CBF74285.1_1816	0.331008	0.392038	0.185336	0.345523
lcl|BN001302.1_cds_CBF74287.1_1817	0.354473	0.414156	0.201791	0.366095
lcl|BN001302.1_cds_CBF74289.1_1818	0.340227	0.387389	0.198427	0.347545
lcl|BN001302.1_cds_CBF74291.1_1819	0.331623	0.380069	0.209193	0.343309
lcl|BN001302.1_cds_CBF74293.1_1820	0.342695	0.389654	0.2014	0.354988
lcl|BN001302.1_cds_CBF74295.1_1821	0.336101	0.405222	0.18472	0.352256
lcl|BN001302.1_cds_CBF74296.1_1822	0.308138	0.337654	0.202756	0.326583
lcl|BN001302.1_cds_CBF74298.1_1823	0.336391	0.409587	0.227346	0.349185
lcl|BN001302.1_cds_CBF74300.1_1824	0.292078	0.340213	0.165341	0.32337
lcl|BN001302.1_cds_CBF74302.1_1825	0.336533	0.393941	0.167619	0.358265
lcl|BN001302.1_cds_CBF74304.1_1826	0.303397	0.299024	0.225564	0.322827
lcl|BN001302.1_cds_CBF74306.1_1827	0.324183	0.360799	0.191369	0.337466
lcl|BN001302.1_cds_CBF74308.1_1828	0.326148	0.385256	0.194832	0.336518
lcl|BN001302.1_cds_CBF74310.1_1829	0.351414	0.441673	0.179719	0.366261
lcl|BN001302.1_cds_CBF74311.1_1830	0.33847	0.449108	0.195564	0.359811
lcl|BN001302.1_cds_CBF74313.1_1831	0.330911	0.395913	0.201529	0.340627
lcl|BN001302.1_cds_CBF74315.1_1832	0.331919	0.394263	0.214836	0.345359
lcl|BN001302.1_cds_CBF74317.1_1833	0.403881	0.512128	0.194533	0.411653
lcl|BN001302.1_cds_CBF74319.1_1834	0.354156	0.437277	0.212507	0.356871
lcl|BN001302.1_cds_CBF74321.1_1835	0.330539	0.382793	0.19087	0.345849
lcl|BN001302.1_cds_CBF74323.1_1836	0.361093	0.451072	0.20066	0.371807
lcl|BN001302.1_cds_CBF74325.1_1837	0.346634	0.425882	0.208136	0.353857
lcl|BN001302.1_cds_CBF74326.1_1838	0.329547	0.391974	0.185587	0.34789
lcl|BN001302.1_cds_CBF74328.1_1839	0.376538	0.470366	0.190045	0.390747
lcl|BN001302.1_cds_CBF74330.1_1840	0.423603	0.560556	0.194912	0.430907
lcl|BN001302.1_cds_CBF74332.1_1841	0.370399	0.430857	0.222296	0.368547
lcl|BN001302.1_cds_CBF74334.1_1842	0.339609	0.402358	0.202152	0.351748
lcl|BN001302.1_cds_CBF74336.1_1843	0.35187	0.423146	0.19348	0.365315
lcl|BN001302.1_cds_CBF74338.1_1844	0.354138	0.418819	0.20413	0.36791
lcl|BN001302.1_cds_CBF74340.1_1845	0.360395	0.445829	0.206046	0.369358
lcl|BN001302.1_cds_CBF74341.1_1846	0.356693	0.409047	0.227545	0.363038
lcl|BN001302.1_cds_CBF74343.1_1847	0.348237	0.423082	0.208624	0.356979
lcl|BN001302.1_cds_CBF74345.1_1848	0.349211	0.413909	0.208769	0.365247
lcl|BN001302.1_cds_CBF74347.1_1849	0.342466	0.401895	0.220825	0.351898
lcl|BN001302.1_cds_CBF74349.1_1850	0.349217	0.42138	0.201151	0.362957
lcl|BN001302.1_cds_CBF74351.1_1851	0.365947	0.438298	0.201909	0.373183
lcl|BN001302.1_cds_CBF74353.1_1852	0.363186	0.446587	0.197532	0.370821
lcl|BN001302.1_cds_CBF74355.1_1853	0.364183	0.432835	0.216301	0.367445
lcl|BN001302.1_cds_CBF74356.1_1854	0.330645	0.393553	0.210658	0.344923
lcl|BN001302.1_cds_CBF74358.1_1855	0.349188	0.4335	0.201585	0.35535
lcl|BN001302.1_cds_CBF74360.1_1856	0.35668	0.432704	0.204831	0.372683
lcl|BN001302.1_cds_CBF74362.1_1857	0.35258	0.446034	0.214145	0.355258
lcl|BN001302.1_cds_CBF74364.1_1858	0.343016	0.434891	0.19931	0.353962
lcl|BN001302.1_cds_CBF74365.1_1859	0.371089	0.473084	0.229217	0.376894
lcl|BN001302.1_cds_CBF74367.1_1860	0.361298	0.437238	0.25678	0.364883
lcl|BN001302.1_cds_CBF74369.1_1861	0.374594	0.463524	0.216429	0.374115
lcl|BN001302.1_cds_CBF74371.1_1862	0.41334	0.617033	0.231923	0.408101
lcl|BN001302.1_cds_CBF74373.1_1863	0.459992	0.652735	0.214752	0.442078
lcl|BN001302.1_cds_CBF74375.1_1864	0.416369	0.523847	0.241957	0.417698
lcl|BN001302.1_cds_CBF74376.1_1865	0.35676	0.404828	0.25657	0.364392
lcl|BN001302.1_cds_CBF74378.1_1866	0.386263	0.495427	0.219526	0.395019
lcl|BN001302.1_cds_CBF74380.1_1867	0.367884	0.459656	0.210192	0.390978
lcl|BN001302.1_cds_CBF74382.1_1868	0.367814	0.443682	0.236555	0.366443
lcl|BN001302.1_cds_CBF74384.1_1869	0.406204	0.50724	0.255496	0.410202
lcl|BN001302.1_cds_CBF74386.1_1870	0.377992	0.457625	0.266125	0.374966
lcl|BN001302.1_cds_CBF74387.1_1871	0.439956	0.648812	0.216438	0.463376
lcl|BN001302.1_cds_CBF74389.1_1872	0.412459	0.537777	0.222003	0.406459
lcl|BN001302.1_cds_CBF74391.1_1873	0.425519	0.53991	0.233306	0.423322
lcl|BN001302.1_cds_CBF74393.1_1874	0.373849	0.459108	0.212452	0.379118
lcl|BN001302.1_cds_CBF74395.1_1875	0.337393	0.42343	0.220918	0.339446
lcl|BN001302.1_cds_CBF74396.1_1876	0.363555	0.446594	0.227173	0.369421
lcl|BN001302.1_cds_CBF74398.1_1877	0.351117	0.432229	0.215557	0.35907
lcl|BN001302.1_cds_CBF74401.1_1878	0.347871	0.423879	0.208652	0.342874
lcl|BN001302.1_cds_CBF74402.1_1879	0.356279	0.434467	0.202729	0.368032
lcl|BN001302.1_cds_CBF74404.1_1880	0.362603	0.452484	0.216586	0.367305
lcl|BN001302.1_cds_CBF74406.1_1881	0.369265	0.461286	0.209124	0.372001
lcl|BN001302.1_cds_CBF74408.1_1882	0.344281	0.435095	0.221094	0.355764
lcl|BN001302.1_cds_CBF74410.1_1883	0.391498	0.490698	0.228445	0.391688
lcl|BN001302.1_cds_CBF74412.1_1884	0.413382	0.488271	0.286787	0.405876
lcl|BN001302.1_cds_CBF74413.1_1885	0.368031	0.445784	0.214241	0.375807
lcl|BN001302.1_cds_CBF74415.1_1886	0.332396	0.424892	0.171768	0.348173
lcl|BN001302.1_cds_CBF74417.1_1887	0.363931	0.465951	0.20289	0.377608
lcl|BN001302.1_cds_CBF74419.1_1888	0.339933	0.413058	0.204916	0.348277
lcl|BN001302.1_cds_CBF74421.1_1889	0.44689	0.565753	0.221264	0.452084
lcl|BN001302.1_cds_CBF74423.1_1890	0.348439	0.409555	0.199805	0.363452
lcl|BN001302.1_cds_CBF74424.1_1891	0.454053	0.590702	0.196927	0.462749
lcl|BN001302.1_cds_CBF74426.1_1892	0.342008	0.420776	0.203218	0.352222
lcl|BN001302.1_cds_CBF74428.1_1893	0.412485	0.51602	0.189984	0.418012
lcl|BN001302.1_cds_CBF74430.1_1894	0.413207	0.513141	0.216834	0.408301
lcl|BN001302.1_cds_CBF74432.1_1895	0.377627	0.45034	0.234595	0.385072
lcl|BN001302.1_cds_CBF74434.1_1896	0.387293	0.474248	0.236379	0.390465
lcl|BN001302.1_cds_CBF74436.1_1897	0.355808	0.427071	0.235682	0.359894
lcl|BN001302.1_cds_CBF74437.1_1898	0.314668	0.358108	0.189224	0.325177
lcl|BN001302.1_cds_CBF74438.1_1899	0.353409	0.436863	0.206638	0.359319
lcl|BN001302.1_cds_CBF74440.1_1900	0.359927	0.449164	0.237341	0.358023
lcl|BN001302.1_cds_CBF74442.1_1901	0.39254	0.472989	0.200607	0.399675
lcl|BN001302.1_cds_CBF74444.1_1902	0.380695	0.471611	0.234078	0.38474
lcl|BN001302.1_cds_CBF74446.1_1903	0.402941	0.516168	0.235068	0.403571
lcl|BN001302.1_cds_CBF74448.1_1904	0.408597	0.532627	0.213795	0.405854
lcl|BN001302.1_cds_CBF74450.1_1905	0.386056	0.466791	0.218629	0.39231
lcl|BN001302.1_cds_CBF74452.1_1906	0.573208	0.843885	0.250607	0.538069
lcl|BN001302.1_cds_CBF74453.1_1907	0.408368	0.545916	0.235609	0.412765
lcl|BN001302.1_cds_CBF74455.1_1908	0.34277	0.386881	0.229166	0.351835
lcl|BN001302.1_cds_CBF74456.1_1909	0.359017	0.435516	0.223527	0.368649
lcl|BN001302.1_cds_CBF74458.1_1910	0.395371	0.521363	0.223847	0.403187
lcl|BN001302.1_cds_CBF74460.1_1911	0.553068	0.846394	0.200796	0.53472
lcl|BN001302.1_cds_CBF74461.1_1912	0.358545	0.436203	0.189871	0.374095
lcl|BN001302.1_cds_CBF74463.1_1913	0.370694	0.446491	0.220244	0.381277
lcl|BN001302.1_cds_CBF74465.1_1914	0.48006	0.701869	0.245517	0.467112
lcl|BN001302.1_cds_CBF74467.1_1915	0.326228	0.390821	0.217493	0.337033
lcl|BN001302.1_cds_CBF74469.1_1916	0.365175	0.456333	0.199796	0.37904
lcl|BN001302.1_cds_CBF74471.1_1917	0.383801	0.478974	0.198078	0.389007
lcl|BN001302.1_cds_CBF74473.1_1918	0.368004	0.457069	0.206882	0.372777
lcl|BN001302.1_cds_CBF74475.1_1919	0.351693	0.418672	0.228392	0.363908
lcl|BN001302.1_cds_CBF74476.1_1920	0.365092	0.444621	0.201005	0.373033
lcl|BN001302.1_cds_CBF74478.1_1921	0.384232	0.514051	0.229363	0.382615
lcl|BN001302.1_cds_CBF74480.1_1922	0.387691	0.48454	0.212481	0.39154
lcl|BN001302.1_cds_CBF74482.1_1923	0.358312	0.444604	0.207627	0.363934
lcl|BN001302.1_cds_CBF74484.1_1924	0.321531	0.397201	0.217045	0.324552
lcl|BN001302.1_cds_CBF74485.1_1925	0.347296	0.435149	0.196254	0.36205
lcl|BN001302.1_cds_CBF74487.1_1926	0.336169	0.40229	0.197635	0.345999
lcl|BN001302.1_cds_CBF74489.1_1927	0.430074	0.576171	0.180965	0.43538
lcl|BN001302.1_cds_CBF74491.1_1928	0.341155	0.403667	0.203103	0.353351
lcl|BN001302.1_cds_CBF74493.1_1929	0.546829	0.757077	0.223503	0.51917
lcl|BN001302.1_cds_CBF74495.1_1930	0.367218	0.437606	0.193538	0.381947
lcl|BN001302.1_cds_CBF74496.1_1931	0.345593	0.438261	0.199698	0.354588
lcl|BN001302.1_cds_CBF74498.1_1932	0.360977	0.454757	0.199328	0.372376
lcl|BN001302.1_cds_CBF74500.1_1933	0.399492	0.532061	0.250359	0.388438
lcl|BN001302.1_cds_CBF74502.1_1934	0.346729	0.417075	0.241044	0.34008
lcl|BN001302.1_cds_CBF74503.1_1935	0.374811	0.472642	0.225064	0.378747
lcl|BN001302.1_cds_CBF74505.1_1936	0.347545	0.424184	0.228201	0.359425
lcl|BN001302.1_cds_CBF74507.1_1937	0.347757	0.415844	0.181267	0.364452
lcl|BN001302.1_cds_CBF74509.1_1938	0.352438	0.421572	0.212421	0.36309
lcl|BN001302.1_cds_CBF74511.1_1939	0.381921	0.473648	0.276394	0.377422
lcl|BN001302.1_cds_CBF74512.1_1940	0.34898	0.430687	0.217916	0.357805
lcl|BN001302.1_cds_CBF74514.1_1941	0.356848	0.420451	0.2267	0.364688
lcl|BN001302.1_cds_CBF74516.1_1942	0.428798	0.551588	0.221239	0.433027
lcl|BN001302.1_cds_CBF74518.1_1943	0.349124	0.447611	0.197854	0.354788
lcl|BN001302.1_cds_CBF74520.1_1944	0.533367	0.815487	0.183972	0.484736
lcl|BN001302.1_cds_CBF74521.1_1945	0.353126	0.436045	0.211095	0.366429
lcl|BN001302.1_cds_CBF74523.1_1946	0.35285	0.425879	0.215438	0.355976
lcl|BN001302.1_cds_CBF74525.1_1947	0.37547	0.462856	0.233743	0.381102
lcl|BN001302.1_cds_CBF74527.1_1948	0.379822	0.464916	0.216789	0.386775
lcl|BN001302.1_cds_CBF74529.1_1949	0.344177	0.426718	0.257303	0.344597
lcl|BN001302.1_cds_CBF74531.1_1950	0.345079	0.419187	0.210106	0.354875
lcl|BN001302.1_cds_CBF74533.1_1951	0.387657	0.524013	0.249103	0.38873
lcl|BN001302.1_cds_CBF74534.1_1952	0.39043	0.515104	0.257466	0.38088
lcl|BN001302.1_cds_CBF74536.1_1953	0.362886	0.439393	0.200003	0.369342
lcl|BN001302.1_cds_CBF74538.1_1954	0.385729	0.48205	0.224285	0.393153
lcl|BN001302.1_cds_CBF74540.1_1955	0.417293	0.539405	0.212118	0.422902
lcl|BN001302.1_cds_CBF74542.1_1956	0.333605	0.403205	0.221709	0.345956
lcl|BN001302.1_cds_CBF74543.1_1957	0.375968	0.4904	0.25091	0.372016
lcl|BN001302.1_cds_CBF74545.1_1958	0.442101	0.59406	0.230133	0.438034
lcl|BN001302.1_cds_CBF74547.1_1959	0.449475	0.616865	0.244495	0.438141
lcl|BN001302.1_cds_CBF74548.1_1960	0.418479	0.571457	0.230109	0.420795
lcl|BN001302.1_cds_CBF74550.1_1961	0.377786	0.48487	0.234338	0.381852
lcl|BN001302.1_cds_CBF74552.1_1962	0.349526	0.422135	0.227412	0.355082
lcl|BN001302.1_cds_CBF74553.1_1963	0.350648	0.444522	0.223003	0.36141
lcl|BN001302.1_cds_CBF74555.1_1964	0.451692	0.621033	0.265975	0.447175
lcl|BN001302.1_cds_CBF74556.1_1965	0.360023	0.447932	0.216763	0.365445
lcl|BN001302.1_cds_CBF74558.1_1966	0.384699	0.518972	0.246325	0.378483
lcl|BN001302.1_cds_CBF74560.1_1967	0.408146	0.522456	0.224209	0.406836
lcl|BN001302.1_cds_CBF74562.1_1968	0.367144	0.469376	0.208006	0.373241
lcl|BN001302.1_cds_CBF74564.1_1969	0.38447	0.482858	0.242467	0.380054
lcl|BN001302.1_cds_CBF74566.1_1970	0.333235	0.408991	0.199044	0.351947
lcl|BN001302.1_cds_CBF74567.1_1971	0.385025	0.489766	0.189394	0.395905
lcl|BN001302.1_cds_CBF74569.1_1972	0.350043	0.431372	0.200807	0.360445
lcl|BN001302.1_cds_CBF74571.1_1973	0.331673	0.397538	0.209048	0.343144
lcl|BN001302.1_cds_CBF74572.1_1974	0.449603	0.574659	0.219002	0.448709
lcl|BN001302.1_cds_CBF74574.1_1975	0.365249	0.456835	0.230032	0.377104
lcl|BN001302.1_cds_CBF74576.1_1976	0.516142	0.827367	0.232566	0.490103
lcl|BN001302.1_cds_CBF74578.1_1977	0.35991	0.422358	0.238071	0.363222
lcl|BN001302.1_cds_CBF74580.1_1978	0.346101	0.420374	0.217638	0.363393
lcl|BN001302.1_cds_CBF74582.1_1979	0.342633	0.39761	0.202748	0.353661
lcl|BN001302.1_cds_CBF74584.1_1980	0.347313	0.426913	0.225286	0.357491
lcl|BN001302.1_cds_CBF74586.1_1981	0.472476	0.703118	0.193208	0.479999
lcl|BN001302.1_cds_CBF74588.1_1982	0.355438	0.470275	0.240847	0.361189
lcl|BN001302.1_cds_CBF74590.1_1983	0.375276	0.477298	0.244001	0.372694
lcl|BN001302.1_cds_CBF74591.1_1984	0.365515	0.474521	0.222423	0.370352
lcl|BN001302.1_cds_CBF74593.1_1985	0.379336	0.482062	0.266287	0.382188
lcl|BN001302.1_cds_CBF74595.1_1986	0.428207	0.57546	0.23301	0.41428
lcl|BN001302.1_cds_CBF74597.1_1987	0.351595	0.433219	0.20738	0.359947
lcl|BN001302.1_cds_CBF74599.1_1988	0.382831	0.491699	0.218078	0.380905
lcl|BN001302.1_cds_CBF74601.1_1989	0.382956	0.491509	0.266862	0.385013
lcl|BN001302.1_cds_CBF74603.1_1990	0.409673	0.528929	0.237895	0.403803
lcl|BN001302.1_cds_CBF74605.1_1991	0.362629	0.442448	0.255414	0.364662
lcl|BN001302.1_cds_CBF74606.1_1992	0.450176	0.644529	0.22938	0.440592
[truncated: 8,599 more rows]

## Sheet: Schizosaccharomyces pombe
gene id	gtAI	CAI	StAI	tAI
lcl|NC_001326.1_cds_NP_039499.1_5123	0.411752	0.490331	0.21343	0.349378
lcl|NC_001326.1_cds_NP_039501.1_5125	0.418376	0.513251	0.174677	0.348392
lcl|NC_001326.1_cds_NP_039502.1_5126	0.426672	0.53728	0.20337	0.358098
lcl|NC_001326.1_cds_NP_039503.1_5127	0.428893	0.499926	0.21874	0.367102
lcl|NC_001326.1_cds_NP_039504.1_5128	0.448558	0.600702	0.216768	0.3776
lcl|NC_001326.1_cds_NP_039505.1_5129	0.401382	0.467008	0.1824	0.332516
lcl|NC_001326.1_cds_NP_039506.1_5130	0.373942	0.485936	0.164904	0.309102
lcl|NC_001326.1_cds_NP_039507.1_5131	0.447937	0.533763	0.272871	0.388268
lcl|NC_001326.1_cds_NP_039508.1_5132	0.426824	0.558737	0.198799	0.356472
lcl|NC_001326.1_cds_NP_112417.1_5124	0.388424	0.471376	0.199212	0.334836
lcl|NC_003421.2_cds_NP_001018849.1_4252	0.428904	0.472244	0.258588	0.38369
lcl|NC_003421.2_cds_NP_001018852.1_4715	0.402497	0.448176	0.210968	0.349829
lcl|NC_003421.2_cds_NP_001018853.4_4867	0.46074	0.539549	0.217322	0.40023
lcl|NC_003421.2_cds_NP_001342722.1_4585	0.491189	0.576061	0.314978	0.439032
lcl|NC_003421.2_cds_NP_001342723.1_4582	0.505057	0.603151	0.273062	0.444612
lcl|NC_003421.2_cds_NP_001342724.1_4499	0.409994	0.440432	0.245076	0.366816
lcl|NC_003421.2_cds_NP_001342725.1_4495	0.638584	0.771203	0.388996	0.570622
lcl|NC_003421.2_cds_NP_001342728.1_5073	0.420359	0.462278	0.226295	0.373789
lcl|NC_003421.2_cds_NP_001342729.1_4287	0.566079	0.674872	0.291339	0.492746
lcl|NC_003421.2_cds_NP_001342730.1_4326	0.4493	0.485656	0.24237	0.396636
lcl|NC_003421.2_cds_NP_001342732.1_5099	0.533591	0.629494	0.324494	0.472228
lcl|NC_003421.2_cds_NP_001342733.1_5100	0.43437	0.483844	0.255439	0.385682
lcl|NC_003421.2_cds_NP_001342734.1_5092	0.429186	0.490156	0.260149	0.384864
lcl|NC_003421.2_cds_NP_001342736.1_4782	0.455784	0.492172	0.306602	0.421842
lcl|NC_003421.2_cds_NP_001342737.1_4777	0.437175	0.48578	0.251269	0.390355
lcl|NC_003421.2_cds_NP_001342744.1_4810	0.483152	0.55134	0.266111	0.425943
lcl|NC_003421.2_cds_NP_001342745.1_4811	0.568643	0.678836	0.422946	0.519509
lcl|NC_003421.2_cds_NP_001342746.1_4818	0.405007	0.425351	0.267972	0.367628
lcl|NC_003421.2_cds_NP_001342748.1_4411	0.423463	0.489715	0.215202	0.369114
lcl|NC_003421.2_cds_NP_001342749.1_4335	0.42825	0.482861	0.239185	0.377363
lcl|NC_003421.2_cds_NP_001342750.1_4337	0.43527	0.495037	0.244587	0.383421
lcl|NC_003421.2_cds_NP_001342752.1_4386	0.427385	0.480324	0.239991	0.380988
lcl|NC_003421.2_cds_NP_001342753.1_4797	0.409514	0.466948	0.183929	0.352399
lcl|NC_003421.2_cds_NP_001342755.1_4456	0.427255	0.465335	0.232323	0.380313
lcl|NC_003421.2_cds_NP_001342756.1_4958	0.565007	0.676231	0.305921	0.498227
lcl|NC_003421.2_cds_NP_001342757.1_4909	0.440795	0.455742	0.253823	0.395839
lcl|NC_003421.2_cds_NP_001342758.1_4246	0.439144	0.482687	0.242133	0.385823
lcl|NC_003421.2_cds_NP_001342763.1_4982	0.48425	0.532808	0.269329	0.427921
lcl|NC_003421.2_cds_NP_001342764.1_4439	0.456528	0.529164	0.221618	0.400805
lcl|NC_003421.2_cds_NP_001342765.1_4216	0.425721	0.473042	0.228625	0.373918
lcl|NC_003421.2_cds_NP_001342769.1_4881	0.431028	0.497152	0.252549	0.383037
lcl|NC_003421.2_cds_NP_001342782.1_4998	0.424003	0.458902	0.238059	0.377811
lcl|NC_003421.2_cds_NP_001342783.1_5023	0.460269	0.548684	0.272078	0.408144
lcl|NC_003421.2_cds_NP_001342785.1_4600	0.49942	0.584529	0.264885	0.436659
lcl|NC_003421.2_cds_NP_001342786.1_4613	0.431567	0.487057	0.214394	0.374434
lcl|NC_003421.2_cds_NP_001342876.1_4758	0.417272	0.484663	0.248134	0.373023
lcl|NC_003421.2_cds_NP_001342882.1_4664	0.433831	0.470715	0.248226	0.386847
lcl|NC_003421.2_cds_NP_001342883.1_4854	0.537081	0.620308	0.323432	0.475878
lcl|NC_003421.2_cds_NP_001342884.1_4856	0.491382	0.557779	0.257507	0.428396
lcl|NC_003421.2_cds_NP_001342886.1_4843	0.393103	0.438615	0.20397	0.34426
lcl|NC_003421.2_cds_NP_001342887.1_4355	0.545752	0.592271	0.302016	0.484106
lcl|NC_003421.2_cds_NP_001342888.1_5114	0.432408	0.466266	0.296505	0.394988
lcl|NC_003421.2_cds_NP_001342905.1_5032	0.430983	0.455727	0.248544	0.375586
lcl|NC_003421.2_cds_NP_001342914.1_4747	0.429522	0.497325	0.213936	0.372772
lcl|NC_003421.2_cds_NP_001342915.1_4689	0.439366	0.509398	0.270432	0.387849
lcl|NC_003421.2_cds_NP_001342924.1_4633	0.511567	0.591868	0.284853	0.450042
lcl|NC_003421.2_cds_NP_001342931.1_4299	0.372228	0.400294	0.311885	0.345425
lcl|NC_003421.2_cds_NP_001342941.1_4449	0.390135	0.414779	0.262728	0.355436
lcl|NC_003421.2_cds_NP_001342946.1_4559	0.420948	0.462605	0.246994	0.374251
lcl|NC_003421.2_cds_NP_001342947.1_4560	0.43593	0.508505	0.265981	0.388393
lcl|NC_003421.2_cds_NP_001342982.1_4472	0.44639	0.484251	0.243209	0.396964
lcl|NC_003421.2_cds_NP_001342988.1_4979	0.475289	0.534348	0.255825	0.418337
lcl|NC_003421.2_cds_NP_001342996.1_4573	0.435821	0.487694	0.237341	0.382613
lcl|NC_003421.2_cds_NP_001342999.1_4473	0.412019	0.486348	0.25194	0.370904
lcl|NC_003421.2_cds_NP_001343000.1_4236	0.431891	0.526765	0.191046	0.371697
lcl|NC_003421.2_cds_NP_001343006.1_4280	0.448763	0.5148	0.253156	0.396868
lcl|NC_003421.2_cds_NP_001343010.1_4640	0.410548	0.499504	0.226543	0.362886
lcl|NC_003421.2_cds_NP_001343012.1_4901	0.393518	0.439083	0.262752	0.357882
lcl|NC_003421.2_cds_NP_001343019.1_4373	0.436461	0.499322	0.242239	0.387193
lcl|NC_003421.2_cds_NP_001343024.1_4907	0.439643	0.465798	0.25338	0.393053
lcl|NC_003421.2_cds_NP_001343052.1_4207	0.414101	0.488144	0.20882	0.361205
lcl|NC_003421.2_cds_NP_001343053.1_4281	0.40327	0.43608	0.209666	0.353004
lcl|NC_003421.2_cds_NP_001343054.1_4307	0.420962	0.516865	0.226296	0.365702
lcl|NC_003421.2_cds_NP_001343055.1_4357	0.415844	0.47545	0.214641	0.360622
lcl|NC_003421.2_cds_NP_001343056.1_4457	0.387058	0.408845	0.223705	0.349259
lcl|NC_003421.2_cds_NP_001343057.1_4706	0.39291	0.467812	0.237473	0.353304
lcl|NC_003421.2_cds_NP_001343058.1_4751	0.345244	0.377312	0.14843	0.289025
lcl|NC_003421.2_cds_NP_001343059.1_4809	0.408184	0.494106	0.23736	0.362415
lcl|NC_003421.2_cds_NP_001343060.1_4836	0.46296	0.64828	0.226853	0.400019
lcl|NC_003421.2_cds_NP_001343061.1_4885	0.411911	0.510986	0.223071	0.359429
lcl|NC_003421.2_cds_NP_001343062.1_5040	0.402196	0.485928	0.216052	0.35257
lcl|NC_003421.2_cds_NP_001343089.1_4215	0.432946	0.446237	0.28635	0.390659
lcl|NC_003421.2_cds_NP_001343090.1_4268	0.409675	0.446893	0.224769	0.361786
lcl|NC_003421.2_cds_NP_001343091.1_4430	0.396937	0.438118	0.27132	0.363002
lcl|NC_003421.2_cds_NP_001343092.1_4461	0.412914	0.474724	0.279596	0.368652
lcl|NC_003421.2_cds_NP_001343093.1_4511	0.439038	0.461772	0.246663	0.388995
lcl|NC_003421.2_cds_NP_001343094.1_4874	0.440574	0.506548	0.286472	0.397481
lcl|NC_003421.2_cds_NP_001343095.1_5089	0.43641	0.520389	0.21489	0.378742
lcl|NC_003421.2_cds_NP_001343096.1_5115	0.455882	0.492069	0.246567	0.406264
lcl|NC_003421.2_cds_NP_001343176.1_4206	0.370217	0.414156	0.160082	0.324631
lcl|NC_003421.2_cds_NP_001343177.1_4239	0.490664	0.555036	0.320979	0.443452
lcl|NC_003421.2_cds_NP_001343178.1_4241	0.439674	0.471527	0.267406	0.39455
lcl|NC_003421.2_cds_NP_001343179.1_4277	0.407575	0.511686	0.240184	0.358674
lcl|NC_003421.2_cds_NP_001343180.1_4278	0.411162	0.480377	0.206709	0.356678
lcl|NC_003421.2_cds_NP_001343181.1_4291	0.364406	0.422814	0.154465	0.313204
lcl|NC_003421.2_cds_NP_001343182.1_4413	0.435421	0.509306	0.253767	0.38531
lcl|NC_003421.2_cds_NP_001343183.1_4572	0.560315	0.682213	0.323406	0.50491
lcl|NC_003421.2_cds_NP_001343184.1_4605	0.397114	0.431929	0.225856	0.356383
lcl|NC_003421.2_cds_NP_001343185.1_4616	0.402059	0.439224	0.249098	0.367583
lcl|NC_003421.2_cds_NP_001343186.1_4756	0.384739	0.411423	0.263855	0.347786
lcl|NC_003421.2_cds_NP_001343187.1_4812	0.453554	0.50964	0.293064	0.422733
lcl|NC_003421.2_cds_NP_001343188.1_4837	0.601798	0.662302	0.3515	0.524702
lcl|NC_003421.2_cds_NP_001343189.1_4937	0.412643	0.512787	0.251628	0.360843
lcl|NC_003421.2_cds_NP_001343190.1_4946	0.425652	0.47837	0.227013	0.369157
lcl|NC_003421.2_cds_NP_587673.1_4204	0.421921	0.430793	0.266078	0.379331
lcl|NC_003421.2_cds_NP_587674.1_4205	0.422989	0.551177	0.188867	0.359666
lcl|NC_003421.2_cds_NP_587676.3_4208	0.413997	0.458666	0.231069	0.361663
lcl|NC_003421.2_cds_NP_587677.1_4209	0.407637	0.466089	0.224738	0.357768
lcl|NC_003421.2_cds_NP_587678.1_4210	0.440427	0.466778	0.236183	0.387731
lcl|NC_003421.2_cds_NP_587679.2_4211	0.412658	0.449628	0.221671	0.365295
lcl|NC_003421.2_cds_NP_587680.1_4212	0.453102	0.507031	0.251308	0.399028
lcl|NC_003421.2_cds_NP_587681.1_4213	0.407599	0.512099	0.236365	0.358417
lcl|NC_003421.2_cds_NP_587682.1_4214	0.548255	0.672125	0.286493	0.478746
lcl|NC_003421.2_cds_NP_587684.1_4217	0.538995	0.621983	0.330524	0.479589
lcl|NC_003421.2_cds_NP_587685.2_4218	0.381983	0.39149	0.243637	0.343396
lcl|NC_003421.2_cds_NP_587686.1_4219	0.437772	0.485651	0.258884	0.393402
lcl|NC_003421.2_cds_NP_587687.1_4220	0.488298	0.542927	0.240874	0.425858
lcl|NC_003421.2_cds_NP_587688.1_4221	0.49796	0.582459	0.266915	0.439783
lcl|NC_003421.2_cds_NP_587689.2_4222	0.440793	0.487076	0.243168	0.38786
lcl|NC_003421.2_cds_NP_587690.1_4223	0.431695	0.467914	0.238451	0.382631
lcl|NC_003421.2_cds_NP_587691.1_4224	0.433359	0.512252	0.187107	0.369528
lcl|NC_003421.2_cds_NP_587692.1_4225	0.418519	0.484973	0.25748	0.37333
lcl|NC_003421.2_cds_NP_587693.1_4226	0.644462	0.781753	0.481493	0.592936
lcl|NC_003421.2_cds_NP_587694.1_4227	0.633148	0.726304	0.387192	0.568566
lcl|NC_003421.2_cds_NP_587695.1_4228	0.407367	0.467946	0.224587	0.357832
lcl|NC_003421.2_cds_NP_587696.2_4229	0.45849	0.521248	0.2407	0.404359
lcl|NC_003421.2_cds_NP_587697.1_4230	0.404158	0.452058	0.223633	0.357611
lcl|NC_003421.2_cds_NP_587698.1_4231	0.489572	0.544385	0.310812	0.441323
lcl|NC_003421.2_cds_NP_587699.1_4232	0.432978	0.444415	0.24937	0.391265
lcl|NC_003421.2_cds_NP_587700.1_4233	0.414418	0.463045	0.214121	0.362718
lcl|NC_003421.2_cds_NP_587701.1_4234	0.424693	0.474397	0.231517	0.373558
lcl|NC_003421.2_cds_NP_587702.1_4235	0.404173	0.4457	0.221079	0.357419
lcl|NC_003421.2_cds_NP_587703.1_4237	0.445763	0.508814	0.248272	0.402204
lcl|NC_003421.2_cds_NP_587704.1_4238	0.437354	0.460278	0.278086	0.398186
lcl|NC_003421.2_cds_NP_587705.1_4240	0.483139	0.551567	0.271162	0.429092
lcl|NC_003421.2_cds_NP_587706.1_4242	0.651599	0.72594	0.399616	0.577977
lcl|NC_003421.2_cds_NP_587707.1_4243	0.398488	0.42467	0.223401	0.352934
lcl|NC_003421.2_cds_NP_587708.1_4244	0.456011	0.506166	0.260864	0.403947
lcl|NC_003421.2_cds_NP_587709.1_4245	0.48034	0.540075	0.265916	0.423915
lcl|NC_003421.2_cds_NP_587711.1_4247	0.429701	0.485647	0.248484	0.381808
lcl|NC_003421.2_cds_NP_587712.1_4248	0.529495	0.63733	0.31333	0.471454
lcl|NC_003421.2_cds_NP_587713.1_4249	0.421173	0.439319	0.247532	0.379484
lcl|NC_003421.2_cds_NP_587714.1_4250	0.66133	0.744405	0.481718	0.604209
lcl|NC_003421.2_cds_NP_587715.1_4251	0.464141	0.502929	0.250414	0.408456
lcl|NC_003421.2_cds_NP_587717.1_4253	0.439909	0.505031	0.226594	0.385077
lcl|NC_003421.2_cds_NP_587718.1_4254	0.498724	0.594206	0.247644	0.430904
lcl|NC_003421.2_cds_NP_587719.1_4255	0.45313	0.510731	0.270494	0.40507
lcl|NC_003421.2_cds_NP_587720.1_4256	0.480018	0.544722	0.265618	0.422018
lcl|NC_003421.2_cds_NP_587721.1_4257	0.473708	0.550905	0.243377	0.4171
lcl|NC_003421.2_cds_NP_587722.1_4258	0.401859	0.427054	0.224381	0.356482
lcl|NC_003421.2_cds_NP_587723.1_4259	0.42064	0.48005	0.222845	0.370724
lcl|NC_003421.2_cds_NP_587724.1_4260	0.43547	0.49216	0.255822	0.385946
lcl|NC_003421.2_cds_NP_587725.1_4261	0.424869	0.483861	0.231282	0.374607
lcl|NC_003421.2_cds_NP_587726.1_4262	0.447359	0.489357	0.246984	0.394369
lcl|NC_003421.2_cds_NP_587727.1_4263	0.404157	0.394156	0.267309	0.369622
lcl|NC_003421.2_cds_NP_587728.1_4264	0.482303	0.527724	0.288535	0.429934
lcl|NC_003421.2_cds_NP_587729.2_4265	0.427451	0.482689	0.229853	0.377805
lcl|NC_003421.2_cds_NP_587730.1_4266	0.410063	0.457239	0.229285	0.360942
lcl|NC_003421.2_cds_NP_587731.1_4267	0.455363	0.504574	0.261572	0.407153
lcl|NC_003421.2_cds_NP_587732.1_4269	0.423959	0.508305	0.214787	0.369456
lcl|NC_003421.2_cds_NP_587733.1_4270	0.412192	0.462725	0.268221	0.371103
lcl|NC_003421.2_cds_NP_587734.1_4271	0.408278	0.513503	0.219375	0.360763
lcl|NC_003421.2_cds_NP_587735.1_4272	0.444761	0.505152	0.231467	0.390015
lcl|NC_003421.2_cds_NP_587736.2_4273	0.4426	0.502299	0.239899	0.390303
lcl|NC_003421.2_cds_NP_587737.1_4274	0.467743	0.524475	0.269851	0.416899
lcl|NC_003421.2_cds_NP_587738.1_4275	0.446084	0.548	0.23099	0.390459
lcl|NC_003421.2_cds_NP_587739.1_4276	0.529757	0.649332	0.292148	0.464808
lcl|NC_003421.2_cds_NP_587740.1_4279	0.570642	0.734805	0.304356	0.499479
lcl|NC_003421.2_cds_NP_587744.2_4282	0.414814	0.45651	0.278751	0.381282
lcl|NC_003421.2_cds_NP_587745.1_4283	0.435369	0.485003	0.211061	0.376133
lcl|NC_003421.2_cds_NP_587746.1_4284	0.574546	0.731439	0.308068	0.503515
lcl|NC_003421.2_cds_NP_587747.1_4285	0.510565	0.609652	0.275878	0.452181
lcl|NC_003421.2_cds_NP_587748.2_4286	0.445318	0.488935	0.254585	0.393187
lcl|NC_003421.2_cds_NP_587750.1_4288	0.434767	0.522328	0.243252	0.381221
lcl|NC_003421.2_cds_NP_587751.1_4289	0.467801	0.508506	0.247592	0.407825
lcl|NC_003421.2_cds_NP_587752.1_4290	0.464189	0.552646	0.225713	0.403335
lcl|NC_003421.2_cds_NP_587754.1_4292	0.448394	0.499888	0.240911	0.394583
lcl|NC_003421.2_cds_NP_587755.1_4293	0.560104	0.612249	0.358314	0.501218
lcl|NC_003421.2_cds_NP_587756.1_4294	0.425035	0.481413	0.235758	0.37772
lcl|NC_003421.2_cds_NP_587757.1_4295	0.685099	0.85241	0.410952	0.609834
lcl|NC_003421.2_cds_NP_587758.1_4296	0.443732	0.493334	0.244195	0.390309
lcl|NC_003421.2_cds_NP_587759.1_4297	0.486869	0.522618	0.265474	0.429066
lcl|NC_003421.2_cds_NP_587760.1_4298	0.528357	0.635271	0.277389	0.463412
lcl|NC_003421.2_cds_NP_587762.2_4300	0.43557	0.507145	0.227754	0.383188
lcl|NC_003421.2_cds_NP_587763.2_4301	0.422594	0.454424	0.249508	0.37901
lcl|NC_003421.2_cds_NP_587764.1_4302	0.587556	0.712983	0.359163	0.519659
lcl|NC_003421.2_cds_NP_587765.1_4303	0.432802	0.485352	0.240169	0.379981
lcl|NC_003421.2_cds_NP_587766.1_4304	0.440247	0.478246	0.260662	0.391942
lcl|NC_003421.2_cds_NP_587767.2_4305	0.422877	0.487409	0.244601	0.375259
lcl|NC_003421.2_cds_NP_587768.1_4306	0.433618	0.510603	0.242659	0.383384
lcl|NC_003421.2_cds_NP_587769.1_4308	0.439871	0.499549	0.223096	0.38485
lcl|NC_003421.2_cds_NP_587770.1_4309	0.407608	0.452597	0.223949	0.360206
lcl|NC_003421.2_cds_NP_587771.1_4310	0.446835	0.51726	0.238363	0.393329
lcl|NC_003421.2_cds_NP_587772.3_4311	0.418654	0.447223	0.229926	0.370498
lcl|NC_003421.2_cds_NP_587773.1_4312	0.413597	0.471	0.23989	0.366472
lcl|NC_003421.2_cds_NP_587774.1_4313	0.426417	0.486664	0.222776	0.373454
lcl|NC_003421.2_cds_NP_587775.1_4314	0.519144	0.621022	0.260171	0.451996
lcl|NC_003421.2_cds_NP_587776.3_4315	0.415707	0.458201	0.203541	0.362171
lcl|NC_003421.2_cds_NP_587777.1_4316	0.41644	0.458348	0.242128	0.371284
lcl|NC_003421.2_cds_NP_587778.1_4317	0.43638	0.47734	0.236956	0.383203
lcl|NC_003421.2_cds_NP_587779.1_4318	0.409338	0.425237	0.225749	0.365169
lcl|NC_003421.2_cds_NP_587780.1_4319	0.44142	0.525619	0.278297	0.392217
lcl|NC_003421.2_cds_NP_587781.1_4320	0.418276	0.461767	0.233	0.373773
lcl|NC_003421.2_cds_NP_587782.1_4321	0.435983	0.479515	0.241787	0.387782
lcl|NC_003421.2_cds_NP_587783.2_4322	0.449897	0.490669	0.259125	0.397973
lcl|NC_003421.2_cds_NP_587784.1_4323	0.481569	0.572361	0.261453	0.424293
lcl|NC_003421.2_cds_NP_587785.1_4324	0.368879	0.367498	0.23144	0.343501
lcl|NC_003421.2_cds_NP_587786.1_4325	0.600013	0.738422	0.373571	0.543422
lcl|NC_003421.2_cds_NP_587788.1_4327	0.476564	0.540002	0.246448	0.419651
lcl|NC_003421.2_cds_NP_587789.1_4328	0.383854	0.38625	0.252091	0.355997
lcl|NC_003421.2_cds_NP_587790.2_4329	0.383038	0.41063	0.198297	0.338533
lcl|NC_003421.2_cds_NP_587791.1_4330	0.401978	0.458504	0.2232	0.355414
lcl|NC_003421.2_cds_NP_587792.1_4331	0.414603	0.45183	0.266469	0.371999
lcl|NC_003421.2_cds_NP_587793.1_4332	0.398326	0.465713	0.244962	0.360716
lcl|NC_003421.2_cds_NP_587794.3_4333	0.487499	0.554655	0.279233	0.429493
lcl|NC_003421.2_cds_NP_587795.1_4334	0.457868	0.4977	0.262616	0.408887
lcl|NC_003421.2_cds_NP_587797.1_4336	0.438404	0.441219	0.253618	0.395206
lcl|NC_003421.2_cds_NP_587799.1_4338	0.405452	0.451714	0.229094	0.35919
lcl|NC_003421.2_cds_NP_587800.1_4339	0.444998	0.50362	0.234152	0.393505
lcl|NC_003421.2_cds_NP_587801.1_4340	0.431074	0.469005	0.254358	0.385042
lcl|NC_003421.2_cds_NP_587802.1_4341	0.512043	0.594114	0.275058	0.447471
lcl|NC_003421.2_cds_NP_587803.1_4342	0.446395	0.4786	0.250982	0.399665
lcl|NC_003421.2_cds_NP_587804.1_4343	0.427955	0.488377	0.233864	0.37759
lcl|NC_003421.2_cds_NP_587805.1_4344	0.429475	0.472397	0.223037	0.377977
lcl|NC_003421.2_cds_NP_587806.1_4345	0.44292	0.469367	0.256995	0.394376
lcl|NC_003421.2_cds_NP_587807.1_4346	0.620944	0.745212	0.398615	0.557258
lcl|NC_003421.2_cds_NP_587808.1_4347	0.421985	0.489302	0.234233	0.373769
lcl|NC_003421.2_cds_NP_587809.2_4348	0.489039	0.559508	0.289331	0.432869
lcl|NC_003421.2_cds_NP_587810.1_4349	0.462705	0.532784	0.290639	0.420262
lcl|NC_003421.2_cds_NP_587811.1_4350	0.440791	0.489955	0.227082	0.387256
lcl|NC_003421.2_cds_NP_587812.1_4351	0.441178	0.487962	0.241426	0.388249
lcl|NC_003421.2_cds_NP_587813.1_4352	0.413199	0.447688	0.23251	0.369586
lcl|NC_003421.2_cds_NP_587814.1_4353	0.454075	0.553073	0.246584	0.400074
lcl|NC_003421.2_cds_NP_587815.1_4354	0.422087	0.456653	0.270585	0.384301
lcl|NC_003421.2_cds_NP_587817.1_4356	0.483892	0.539423	0.295436	0.435187
lcl|NC_003421.2_cds_NP_587818.1_4358	0.502561	0.59665	0.243367	0.43446
lcl|NC_003421.2_cds_NP_587819.1_4359	0.417482	0.503409	0.222933	0.367992
lcl|NC_003421.2_cds_NP_587820.1_4360	0.414045	0.47827	0.243392	0.368689
lcl|NC_003421.2_cds_NP_587821.1_4361	0.484504	0.568896	0.290723	0.439139
lcl|NC_003421.2_cds_NP_587822.1_4362	0.432643	0.510596	0.252434	0.383391
lcl|NC_003421.2_cds_NP_587823.2_4363	0.438693	0.484987	0.266241	0.395082
lcl|NC_003421.2_cds_NP_587824.1_4364	0.454515	0.472916	0.247309	0.398144
lcl|NC_003421.2_cds_NP_587825.1_4365	0.431813	0.445764	0.287524	0.397764
lcl|NC_003421.2_cds_NP_587826.1_4366	0.433785	0.479609	0.211914	0.379735
lcl|NC_003421.2_cds_NP_587827.1_4367	0.416302	0.470617	0.1927	0.358353
lcl|NC_003421.2_cds_NP_587828.1_4368	0.417752	0.444579	0.235411	0.373746
lcl|NC_003421.2_cds_NP_587829.1_4369	0.442662	0.507885	0.23047	0.386448
lcl|NC_003421.2_cds_NP_587830.1_4370	0.46377	0.528096	0.237242	0.408448
lcl|NC_003421.2_cds_NP_587831.1_4371	0.437509	0.481232	0.237362	0.386066
lcl|NC_003421.2_cds_NP_587832.1_4372	0.440703	0.448588	0.296912	0.399511
lcl|NC_003421.2_cds_NP_587834.1_4374	0.469682	0.525885	0.240823	0.410619
lcl|NC_003421.2_cds_NP_587835.1_4375	0.449663	0.497151	0.224249	0.393984
lcl|NC_003421.2_cds_NP_587836.1_4376	0.4365	0.472521	0.264899	0.396567
lcl|NC_003421.2_cds_NP_587837.1_4377	0.598692	0.726387	0.355923	0.53349
lcl|NC_003421.2_cds_NP_587838.1_4378	0.542285	0.660853	0.336212	0.487059
lcl|NC_003421.2_cds_NP_587839.1_4379	0.440452	0.520515	0.219866	0.386819
lcl|NC_003421.2_cds_NP_587840.1_4380	0.436877	0.481272	0.291621	0.399785
lcl|NC_003421.2_cds_NP_587841.1_4381	0.640634	0.754611	0.390759	0.569333
lcl|NC_003421.2_cds_NP_587842.1_4382	0.419902	0.443587	0.260788	0.37915
lcl|NC_003421.2_cds_NP_587843.1_4383	0.436739	0.490268	0.260511	0.38702
lcl|NC_003421.2_cds_NP_587844.1_4384	0.416709	0.484914	0.217994	0.361954
lcl|NC_003421.2_cds_NP_587845.1_4385	0.428615	0.49563	0.26875	0.387415
lcl|NC_003421.2_cds_NP_587847.1_4387	0.417431	0.452909	0.228983	0.368076
lcl|NC_003421.2_cds_NP_587848.1_4388	0.417092	0.494556	0.239841	0.367854
lcl|NC_003421.2_cds_NP_587849.1_4389	0.454251	0.48169	0.256291	0.408903
lcl|NC_003421.2_cds_NP_587850.1_4390	0.625859	0.721633	0.470495	0.576593
lcl|NC_003421.2_cds_NP_587851.1_4391	0.438134	0.502717	0.216407	0.384683
lcl|NC_003421.2_cds_NP_587852.1_4392	0.525158	0.602149	0.27345	0.458846
lcl|NC_003421.2_cds_NP_587853.1_4393	0.427874	0.476112	0.244645	0.380865
lcl|NC_003421.2_cds_NP_587854.2_4394	0.419169	0.47735	0.20543	0.365207
lcl|NC_003421.2_cds_NP_587855.2_4395	0.416458	0.461445	0.240464	0.369306
lcl|NC_003421.2_cds_NP_587856.1_4396	0.451461	0.472282	0.263495	0.400878
lcl|NC_003421.2_cds_NP_587857.2_4397	0.408595	0.444468	0.244691	0.364503
lcl|NC_003421.2_cds_NP_587858.1_4398	0.379377	0.445247	0.21811	0.339018
lcl|NC_003421.2_cds_NP_587859.1_4399	0.417637	0.509093	0.238562	0.376286
lcl|NC_003421.2_cds_NP_587860.1_4400	0.44158	0.469358	0.232093	0.392372
lcl|NC_003421.2_cds_NP_587861.1_4401	0.434346	0.496038	0.236961	0.383281
lcl|NC_003421.2_cds_NP_587862.1_4402	0.447065	0.492765	0.237754	0.393154
lcl|NC_003421.2_cds_NP_587863.1_4403	0.649915	0.830422	0.383961	0.576122
lcl|NC_003421.2_cds_NP_587864.1_4404	0.593587	0.705213	0.364904	0.528115
lcl|NC_003421.2_cds_NP_587865.1_4405	0.473195	0.50311	0.270887	0.420476
lcl|NC_003421.2_cds_NP_587866.3_4406	0.430938	0.488227	0.244811	0.381276
lcl|NC_003421.2_cds_NP_587868.1_4407	0.494772	0.572389	0.278182	0.438296
lcl|NC_003421.2_cds_NP_587869.1_4408	0.64258	0.815768	0.448912	0.581204
lcl|NC_003421.2_cds_NP_587870.2_4409	0.407023	0.468435	0.227627	0.359524
lcl|NC_003421.2_cds_NP_587871.1_4410	0.46097	0.484381	0.26018	0.407571
lcl|NC_003421.2_cds_NP_587873.1_4412	0.564228	0.637099	0.314369	0.502074
lcl|NC_003421.2_cds_NP_587874.1_4414	0.387416	0.4052	0.231954	0.35699
lcl|NC_003421.2_cds_NP_587875.2_4415	0.430734	0.477532	0.204871	0.374215
lcl|NC_003421.2_cds_NP_587876.1_4416	0.527192	0.616989	0.298118	0.469735
lcl|NC_003421.2_cds_NP_587877.1_4417	0.44429	0.50844	0.24423	0.393489
lcl|NC_003421.2_cds_NP_587878.1_4418	0.435558	0.476451	0.238175	0.382692
lcl|NC_003421.2_cds_NP_587879.1_4419	0.442374	0.510781	0.254923	0.393846
lcl|NC_003421.2_cds_NP_587880.1_4420	0.433517	0.483925	0.231946	0.380489
lcl|NC_003421.2_cds_NP_587881.1_4421	0.453218	0.533502	0.239823	0.396909
lcl|NC_003421.2_cds_NP_587882.1_4422	0.448058	0.504674	0.245763	0.395059
lcl|NC_003421.2_cds_NP_587883.1_4423	0.445785	0.497816	0.25326	0.394596
lcl|NC_003421.2_cds_NP_587884.2_4424	0.428805	0.496262	0.249797	0.38265
lcl|NC_003421.2_cds_NP_587885.1_4425	0.524149	0.655189	0.297317	0.462375
lcl|NC_003421.2_cds_NP_587886.1_4426	0.40241	0.446019	0.190482	0.349492
lcl|NC_003421.2_cds_NP_587887.1_4427	0.41609	0.476938	0.216602	0.366331
lcl|NC_003421.2_cds_NP_587888.2_4428	0.413591	0.457669	0.235143	0.367873
lcl|NC_003421.2_cds_NP_587889.1_4429	0.456033	0.52913	0.256006	0.402126
lcl|NC_003421.2_cds_NP_587890.1_4431	0.479376	0.543776	0.255749	0.421542
lcl|NC_003421.2_cds_NP_587891.1_4432	0.656349	0.800942	0.4168	0.59276
lcl|NC_003421.2_cds_NP_587892.2_4433	0.473964	0.544247	0.28414	0.418841
lcl|NC_003421.2_cds_NP_587893.1_4434	0.42952	0.514834	0.237989	0.37522
lcl|NC_003421.2_cds_NP_587894.1_4435	0.490675	0.554636	0.268858	0.433624
lcl|NC_003421.2_cds_NP_587895.1_4436	0.414303	0.459578	0.238043	0.368847
lcl|NC_003421.2_cds_NP_587896.1_4437	0.494899	0.526029	0.305535	0.44148
lcl|NC_003421.2_cds_NP_587897.1_4438	0.662803	0.758036	0.420549	0.597185
lcl|NC_003421.2_cds_NP_587899.1_4440	0.429507	0.525041	0.230543	0.375388
lcl|NC_003421.2_cds_NP_587900.1_4441	0.476452	0.544267	0.277414	0.42126
lcl|NC_003421.2_cds_NP_587901.1_4442	0.463473	0.522248	0.236276	0.405797
lcl|NC_003421.2_cds_NP_587902.1_4443	0.429391	0.477331	0.234662	0.378029
lcl|NC_003421.2_cds_NP_587903.1_4444	0.41684	0.489185	0.222634	0.365913
lcl|NC_003421.2_cds_NP_587904.1_4445	0.470306	0.548724	0.249406	0.41341
lcl|NC_003421.2_cds_NP_587905.2_4446	0.411651	0.420349	0.238855	0.368502
lcl|NC_003421.2_cds_NP_587906.1_4447	0.430449	0.468318	0.253405	0.387475
lcl|NC_003421.2_cds_NP_587907.1_4448	0.611339	0.719653	0.359646	0.540895
lcl|NC_003421.2_cds_NP_587910.3_4450	0.379951	0.402144	0.231909	0.343769
lcl|NC_003421.2_cds_NP_587911.1_4451	0.386264	0.395547	0.27942	0.366326
lcl|NC_003421.2_cds_NP_587912.1_4452	0.450843	0.520356	0.231294	0.397872
lcl|NC_003421.2_cds_NP_587913.1_4453	0.448024	0.460043	0.288727	0.411692
lcl|NC_003421.2_cds_NP_587914.1_4454	0.3975	0.469606	0.239311	0.35692
lcl|NC_003421.2_cds_NP_587915.1_4455	0.426631	0.470006	0.268426	0.386048
lcl|NC_003421.2_cds_NP_587917.1_4458	0.44741	0.497439	0.229867	0.392629
lcl|NC_003421.2_cds_NP_587918.1_4459	0.448264	0.501944	0.250697	0.395349
lcl|NC_003421.2_cds_NP_587919.1_4460	0.450519	0.48118	0.250259	0.400546
lcl|NC_003421.2_cds_NP_587920.1_4462	0.465639	0.532647	0.25667	0.413728
lcl|NC_003421.2_cds_NP_587921.1_4463	0.440521	0.501582	0.256755	0.392464
lcl|NC_003421.2_cds_NP_587922.1_4464	0.418915	0.436493	0.211386	0.366794
lcl|NC_003421.2_cds_NP_587923.1_4465	0.665736	0.760871	0.42433	0.600572
lcl|NC_003421.2_cds_NP_587924.1_4466	0.421241	0.467706	0.235074	0.373899
lcl|NC_003421.2_cds_NP_587925.2_4467	0.453031	0.480976	0.236285	0.394086
lcl|NC_003421.2_cds_NP_587926.2_4468	0.415046	0.459232	0.253244	0.372289
lcl|NC_003421.2_cds_NP_587927.1_4469	0.435294	0.430614	0.250811	0.385588
lcl|NC_003421.2_cds_NP_587928.1_4470	0.448751	0.48481	0.258762	0.399888
lcl|NC_003421.2_cds_NP_587929.1_4471	0.435045	0.492254	0.252075	0.388416
lcl|NC_003421.2_cds_NP_587932.3_4474	0.480976	0.566812	0.250172	0.421134
lcl|NC_003421.2_cds_NP_587933.1_4475	0.461624	0.506402	0.258905	0.407631
lcl|NC_003421.2_cds_NP_587934.1_4476	0.376633	0.377643	0.212882	0.333394
lcl|NC_003421.2_cds_NP_587935.1_4477	0.417128	0.451907	0.227229	0.369566
lcl|NC_003421.2_cds_NP_587936.1_4478	0.462096	0.512466	0.251328	0.406903
lcl|NC_003421.2_cds_NP_587937.2_4479	0.467089	0.499482	0.276247	0.418778
lcl|NC_003421.2_cds_NP_587938.1_4480	0.431274	0.498424	0.234444	0.379448
lcl|NC_003421.2_cds_NP_587939.1_4481	0.428904	0.50035	0.252889	0.38048
lcl|NC_003421.2_cds_NP_587940.1_4482	0.404189	0.432451	0.207938	0.35461
lcl|NC_003421.2_cds_NP_587941.1_4483	0.417691	0.469747	0.230322	0.371518
lcl|NC_003421.2_cds_NP_587942.1_4484	0.395566	0.436764	0.248762	0.356943
lcl|NC_003421.2_cds_NP_587943.2_4485	0.422194	0.497609	0.236463	0.372632
lcl|NC_003421.2_cds_NP_587944.1_4486	0.500027	0.586954	0.326794	0.446537
lcl|NC_003421.2_cds_NP_587945.1_4487	0.464177	0.462006	0.265399	0.410733
lcl|NC_003421.2_cds_NP_587946.1_4488	0.43689	0.492019	0.229832	0.386512
lcl|NC_003421.2_cds_NP_587947.2_4489	0.418278	0.479857	0.216987	0.365614
lcl|NC_003421.2_cds_NP_587948.2_4490	0.444043	0.513286	0.230656	0.38811
lcl|NC_003421.2_cds_NP_587949.1_4491	0.500488	0.591819	0.246526	0.433338
lcl|NC_003421.2_cds_NP_587950.1_4492	0.38603	0.424557	0.187586	0.344222
lcl|NC_003421.2_cds_NP_587951.1_4493	0.435678	0.478878	0.24472	0.38924
lcl|NC_003421.2_cds_NP_587952.1_4494	0.47757	0.512857	0.294346	0.426248
lcl|NC_003421.2_cds_NP_587954.1_4496	0.451637	0.50252	0.257242	0.404699
lcl|NC_003421.2_cds_NP_587955.1_4497	0.399973	0.459126	0.227018	0.349791
lcl|NC_003421.2_cds_NP_587956.1_4498	0.492997	0.52965	0.29922	0.439897
lcl|NC_003421.2_cds_NP_587958.1_4500	0.435564	0.487851	0.246847	0.387762
lcl|NC_003421.2_cds_NP_587959.2_4501	0.461709	0.512836	0.266939	0.407849
lcl|NC_003421.2_cds_NP_587960.1_4502	0.411201	0.399726	0.275266	0.377001
lcl|NC_003421.2_cds_NP_587961.1_4503	0.637799	0.792801	0.379513	0.568385
lcl|NC_003421.2_cds_NP_587962.1_4504	0.422254	0.491988	0.264311	0.378409
lcl|NC_003421.2_cds_NP_587963.1_4505	0.425663	0.494812	0.226506	0.373842
lcl|NC_003421.2_cds_NP_587964.2_4506	0.380834	0.416914	0.223877	0.341467
lcl|NC_003421.2_cds_NP_587965.1_4507	0.422881	0.477056	0.242928	0.374047
lcl|NC_003421.2_cds_NP_587966.1_4508	0.470308	0.533354	0.26666	0.422706
lcl|NC_003421.2_cds_NP_587967.1_4509	0.416766	0.476179	0.262337	0.375033
lcl|NC_003421.2_cds_NP_587968.1_4510	0.487015	0.534447	0.250496	0.424334
lcl|NC_003421.2_cds_NP_587969.1_4512	0.418069	0.414295	0.28074	0.379136
lcl|NC_003421.2_cds_NP_587970.1_4513	0.483773	0.50905	0.276879	0.435277
lcl|NC_003421.2_cds_NP_587971.1_4514	0.461036	0.522446	0.256087	0.409677
lcl|NC_003421.2_cds_NP_587972.1_4515	0.518813	0.606631	0.288367	0.458288
lcl|NC_003421.2_cds_NP_587974.1_4516	0.384339	0.408998	0.212506	0.338194
lcl|NC_003421.2_cds_NP_587975.2_4517	0.400196	0.426772	0.223253	0.35579
lcl|NC_003421.2_cds_NP_587976.1_4518	0.490593	0.583954	0.22689	0.423803
lcl|NC_003421.2_cds_NP_587977.2_4519	0.453027	0.502352	0.258882	0.401795
lcl|NC_003421.2_cds_NP_587978.1_4520	0.430769	0.488352	0.238301	0.379233
lcl|NC_003421.2_cds_NP_587979.1_4521	0.427888	0.487396	0.24775	0.37861
lcl|NC_003421.2_cds_NP_587980.1_4522	0.429348	0.490661	0.240864	0.388146
lcl|NC_003421.2_cds_NP_587981.1_4523	0.446033	0.524001	0.234935	0.386392
lcl|NC_003421.2_cds_NP_587982.1_4524	0.43824	0.489218	0.253347	0.390803
lcl|NC_003421.2_cds_NP_587983.3_4525	0.392597	0.464056	0.208904	0.349653
lcl|NC_003421.2_cds_NP_587984.1_4526	0.428685	0.441267	0.256348	0.38432
lcl|NC_003421.2_cds_NP_587985.1_4527	0.469788	0.543151	0.238497	0.414304
lcl|NC_003421.2_cds_NP_587986.1_4528	0.426571	0.431244	0.241138	0.385932
lcl|NC_003421.2_cds_NP_587987.1_4529	0.47518	0.509904	0.272324	0.428751
lcl|NC_003421.2_cds_NP_587988.1_4530	0.426755	0.475635	0.231766	0.378792
lcl|NC_003421.2_cds_NP_587989.2_4531	0.456371	0.505537	0.240113	0.401156
lcl|NC_003421.2_cds_NP_587990.1_4532	0.431995	0.492383	0.234552	0.37987
lcl|NC_003421.2_cds_NP_587991.1_4533	0.423956	0.475285	0.251031	0.379205
lcl|NC_003421.2_cds_NP_587992.1_4534	0.477959	0.598135	0.252815	0.411283
lcl|NC_003421.2_cds_NP_587993.1_4535	0.393265	0.450296	0.221588	0.347764
lcl|NC_003421.2_cds_NP_587994.1_4536	0.428022	0.460261	0.25193	0.382858
lcl|NC_003421.2_cds_NP_587995.1_4537	0.431883	0.488608	0.249757	0.385242
lcl|NC_003421.2_cds_NP_587996.1_4538	0.496083	0.550924	0.269466	0.43448
lcl|NC_003421.2_cds_NP_587997.1_4539	0.558667	0.67603	0.305301	0.493732
lcl|NC_003421.2_cds_NP_587998.1_4540	0.455455	0.476389	0.251664	0.405521
lcl|NC_003421.2_cds_NP_587999.1_4541	0.406795	0.461918	0.221001	0.359693
lcl|NC_003421.2_cds_NP_588000.1_4542	0.429217	0.47479	0.219789	0.37516
lcl|NC_003421.2_cds_NP_588001.1_4543	0.383433	0.400127	0.232926	0.348314
lcl|NC_003421.2_cds_NP_588002.1_4544	0.49349	0.556768	0.337009	0.447245
lcl|NC_003421.2_cds_NP_588003.1_4545	0.418677	0.468194	0.245325	0.378126
lcl|NC_003421.2_cds_NP_588004.2_4546	0.45005	0.475775	0.264542	0.402571
lcl|NC_003421.2_cds_NP_588005.1_4547	0.435199	0.483452	0.229842	0.384651
lcl|NC_003421.2_cds_NP_588006.1_4548	0.464584	0.529387	0.259246	0.412208
lcl|NC_003421.2_cds_NP_588007.1_4549	0.407878	0.450306	0.226827	0.360691
lcl|NC_003421.2_cds_NP_588008.1_4550	0.51461	0.717881	0.306586	0.457329
lcl|NC_003421.2_cds_NP_588009.1_4551	0.475248	0.526446	0.280448	0.427633
lcl|NC_003421.2_cds_NP_588010.1_4552	0.443801	0.488411	0.25125	0.392728
lcl|NC_003421.2_cds_NP_588011.1_4553	0.421882	0.461045	0.253157	0.378437
lcl|NC_003421.2_cds_NP_588012.1_4554	0.616743	0.692816	0.441522	0.562735
lcl|NC_003421.2_cds_NP_588013.1_4555	0.435509	0.473183	0.250844	0.38966
lcl|NC_003421.2_cds_NP_588014.1_4556	0.41349	0.475987	0.271127	0.37457
lcl|NC_003421.2_cds_NP_588015.1_4557	0.430664	0.49536	0.270472	0.389313
lcl|NC_003421.2_cds_NP_588016.1_4558	0.453934	0.549191	0.224371	0.402601
lcl|NC_003421.2_cds_NP_588019.2_4561	0.459525	0.481501	0.266124	0.405076
lcl|NC_003421.2_cds_NP_588020.1_4562	0.47404	0.559655	0.222183	0.40993
lcl|NC_003421.2_cds_NP_588021.1_4563	0.487295	0.487772	0.299052	0.434031
lcl|NC_003421.2_cds_NP_588022.2_4564	0.400163	0.426625	0.256761	0.36271
lcl|NC_003421.2_cds_NP_588023.1_4565	0.45877	0.487568	0.276606	0.40994
lcl|NC_003421.2_cds_NP_588024.1_4566	0.663307	0.825297	0.402555	0.592567
lcl|NC_003421.2_cds_NP_588025.2_4567	0.426614	0.483997	0.252178	0.379965
lcl|NC_003421.2_cds_NP_588026.2_4568	0.446364	0.513883	0.265527	0.398861
lcl|NC_003421.2_cds_NP_588027.1_4569	0.596256	0.726475	0.335537	0.525356
lcl|NC_003421.2_cds_NP_588028.1_4570	0.430876	0.47273	0.254865	0.385809
lcl|NC_003421.2_cds_NP_588029.1_4571	0.509085	0.584187	0.275036	0.448954
lcl|NC_003421.2_cds_NP_588031.3_4574	0.569563	0.673295	0.371835	0.507984
lcl|NC_003421.2_cds_NP_588032.1_4575	0.44497	0.480504	0.252281	0.393134
lcl|NC_003421.2_cds_NP_588033.1_4576	0.572419	0.6855	0.300731	0.499247
lcl|NC_003421.2_cds_NP_588034.1_4577	0.447362	0.495114	0.234198	0.396569
lcl|NC_003421.2_cds_NP_588035.1_4578	0.418993	0.467285	0.212784	0.372839
lcl|NC_003421.2_cds_NP_588036.2_4579	0.42114	0.476624	0.261333	0.38052
lcl|NC_003421.2_cds_NP_588037.1_4580	0.353132	0.330146	0.216423	0.321537
lcl|NC_003421.2_cds_NP_588038.1_4581	0.548689	0.678586	0.292973	0.477046
lcl|NC_003421.2_cds_NP_588040.1_4583	0.473472	0.526774	0.280439	0.417871
lcl|NC_003421.2_cds_NP_588041.1_4584	0.493148	0.563968	0.287327	0.433367
lcl|NC_003421.2_cds_NP_588043.2_4586	0.412217	0.463321	0.242807	0.370689
lcl|NC_003421.2_cds_NP_588044.1_4587	0.433578	0.470551	0.257645	0.388605
lcl|NC_003421.2_cds_NP_588045.1_4588	0.424902	0.499253	0.240457	0.378342
lcl|NC_003421.2_cds_NP_588046.1_4589	0.449462	0.505543	0.260962	0.398977
lcl|NC_003421.2_cds_NP_588047.1_4590	0.439955	0.497369	0.245064	0.390234
lcl|NC_003421.2_cds_NP_588048.1_4591	0.418363	0.446275	0.253782	0.375526
lcl|NC_003421.2_cds_NP_588049.1_4592	0.428375	0.491284	0.226238	0.376341
lcl|NC_003421.2_cds_NP_588050.1_4593	0.425926	0.477628	0.242477	0.377325
lcl|NC_003421.2_cds_NP_588051.1_4594	0.503994	0.579794	0.289153	0.444947
lcl|NC_003421.2_cds_NP_588052.1_4595	0.445722	0.529468	0.236939	0.389761
lcl|NC_003421.2_cds_NP_588053.1_4596	0.472279	0.507709	0.270528	0.421121
lcl|NC_003421.2_cds_NP_588054.1_4597	0.375129	0.433577	0.194423	0.329962
lcl|NC_003421.2_cds_NP_588055.1_4598	0.394449	0.395044	0.225224	0.353825
lcl|NC_003421.2_cds_NP_588057.2_4599	0.661468	0.792229	0.459305	0.599939
lcl|NC_003421.2_cds_NP_588059.1_4601	0.412236	0.507156	0.218322	0.36864
lcl|NC_003421.2_cds_NP_588060.1_4602	0.387858	0.396624	0.245761	0.348622
lcl|NC_003421.2_cds_NP_588061.1_4603	0.537016	0.602333	0.32261	0.468321
lcl|NC_003421.2_cds_NP_588062.1_4604	0.412917	0.46836	0.249318	0.37052
lcl|NC_003421.2_cds_NP_588063.1_4606	0.416833	0.45069	0.249944	0.371943
lcl|NC_003421.2_cds_NP_588064.1_4607	0.470848	0.510506	0.265355	0.418852
lcl|NC_003421.2_cds_NP_588065.1_4608	0.459224	0.52497	0.266187	0.407385
lcl|NC_003421.2_cds_NP_588066.1_4609	0.417986	0.466878	0.223025	0.367605
lcl|NC_003421.2_cds_NP_588067.1_4610	0.416383	0.494475	0.207177	0.363751
lcl|NC_003421.2_cds_NP_588068.2_4611	0.425996	0.471329	0.235027	0.376547
lcl|NC_003421.2_cds_NP_588069.1_4612	0.449405	0.497082	0.252506	0.393268
lcl|NC_003421.2_cds_NP_588071.1_4614	0.398009	0.45523	0.235632	0.35133
lcl|NC_003421.2_cds_NP_588072.1_4615	0.415734	0.463812	0.235494	0.368411
lcl|NC_003421.2_cds_NP_588073.1_4617	0.42536	0.470996	0.220909	0.37233
lcl|NC_003421.2_cds_NP_588074.1_4618	0.442315	0.507057	0.23755	0.388091
lcl|NC_003421.2_cds_NP_588075.1_4619	0.435849	0.472679	0.232698	0.386183
lcl|NC_003421.2_cds_NP_588076.1_4620	0.443403	0.495329	0.265998	0.393307
lcl|NC_003421.2_cds_NP_588077.1_4621	0.428188	0.464696	0.265342	0.383292
lcl|NC_003421.2_cds_NP_588078.1_4622	0.397646	0.44609	0.203791	0.347127
lcl|NC_003421.2_cds_NP_588079.1_4623	0.421119	0.425917	0.277788	0.383187
lcl|NC_003421.2_cds_NP_588080.1_4624	0.460164	0.529559	0.270805	0.409572
lcl|NC_003421.2_cds_NP_588081.2_4625	0.428995	0.453821	0.317777	0.395634
lcl|NC_003421.2_cds_NP_588082.1_4626	0.436967	0.489688	0.260598	0.389013
lcl|NC_003421.2_cds_NP_588083.1_4627	0.507334	0.608969	0.294434	0.451069
lcl|NC_003421.2_cds_NP_588084.1_4628	0.441526	0.470829	0.253656	0.394709
lcl|NC_003421.2_cds_NP_588085.2_4629	0.464721	0.524077	0.273555	0.41513
lcl|NC_003421.2_cds_NP_588086.1_4630	0.438124	0.48588	0.23534	0.384847
lcl|NC_003421.2_cds_NP_588087.1_4631	0.463409	0.500921	0.253054	0.409038
lcl|NC_003421.2_cds_NP_588088.1_4632	0.403948	0.467699	0.209486	0.355954
lcl|NC_003421.2_cds_NP_588091.1_4634	0.438566	0.483347	0.248708	0.388892
lcl|NC_003421.2_cds_NP_588092.1_4635	0.424111	0.479963	0.245631	0.376572
lcl|NC_003421.2_cds_NP_588093.1_4636	0.416265	0.510217	0.212734	0.361582
lcl|NC_003421.2_cds_NP_588094.1_4637	0.430452	0.459632	0.24899	0.380206
lcl|NC_003421.2_cds_NP_588095.1_4638	0.442079	0.491573	0.254388	0.390776
lcl|NC_003421.2_cds_NP_588096.1_4639	0.4203	0.454074	0.240349	0.374548
lcl|NC_003421.2_cds_NP_588098.1_4641	0.536042	0.605827	0.333481	0.487572
lcl|NC_003421.2_cds_NP_588099.1_4642	0.465619	0.510658	0.263096	0.414302
lcl|NC_003421.2_cds_NP_588100.1_4643	0.510613	0.597292	0.294918	0.45491
lcl|NC_003421.2_cds_NP_588101.1_4644	0.420304	0.461317	0.256165	0.37437
lcl|NC_003421.2_cds_NP_588102.1_4645	0.460144	0.51588	0.269096	0.407316
lcl|NC_003421.2_cds_NP_588103.1_4646	0.469976	0.556644	0.266149	0.418286
lcl|NC_003421.2_cds_NP_588104.1_4647	0.402698	0.444164	0.239703	0.359322
lcl|NC_003421.2_cds_NP_588105.1_4648	0.441665	0.457962	0.258272	0.399478
lcl|NC_003421.2_cds_NP_588106.2_4649	0.510178	0.570716	0.317113	0.458136
lcl|NC_003421.2_cds_NP_588107.1_4650	0.459471	0.532933	0.240572	0.401904
lcl|NC_003421.2_cds_NP_588108.3_4651	0.412925	0.482469	0.218101	0.361931
lcl|NC_003421.2_cds_NP_588110.2_4652	0.452961	0.504994	0.267136	0.406179
lcl|NC_003421.2_cds_NP_588111.2_4653	0.421057	0.467224	0.229364	0.370044
lcl|NC_003421.2_cds_NP_588112.1_4654	0.421301	0.468478	0.25997	0.380935
lcl|NC_003421.2_cds_NP_588113.1_4655	0.388884	0.405008	0.223075	0.347928
lcl|NC_003421.2_cds_NP_588114.1_4656	0.44234	0.509591	0.255645	0.395801
lcl|NC_003421.2_cds_NP_588115.1_4657	0.433855	0.48699	0.2415	0.383899
lcl|NC_003421.2_cds_NP_588116.1_4658	0.431257	0.480604	0.22615	0.37985
lcl|NC_003421.2_cds_NP_588117.1_4659	0.484477	0.55544	0.273151	0.428294
lcl|NC_003421.2_cds_NP_588118.1_4660	0.442693	0.469647	0.259478	0.390642
lcl|NC_003421.2_cds_NP_588119.1_4661	0.422761	0.46522	0.246695	0.375149
lcl|NC_003421.2_cds_NP_588120.1_4662	0.422026	0.512198	0.194663	0.35896
lcl|NC_003421.2_cds_NP_588121.1_4663	0.426979	0.495053	0.230891	0.37828
lcl|NC_003421.2_cds_NP_588123.1_4665	0.530325	0.600455	0.315566	0.474261
lcl|NC_003421.2_cds_NP_588124.2_4666	0.439299	0.471215	0.255664	0.396423
lcl|NC_003421.2_cds_NP_588125.2_4667	0.446851	0.442968	0.333287	0.419952
lcl|NC_003421.2_cds_NP_588126.1_4668	0.424754	0.513013	0.222693	0.37113
lcl|NC_003421.2_cds_NP_588127.1_4669	0.462357	0.50224	0.258975	0.410224
lcl|NC_003421.2_cds_NP_588128.1_4670	0.460582	0.509503	0.239663	0.406489
lcl|NC_003421.2_cds_NP_588129.2_4671	0.415369	0.470945	0.229105	0.367854
lcl|NC_003421.2_cds_NP_588130.1_4672	0.446067	0.505461	0.237548	0.393049
lcl|NC_003421.2_cds_NP_588131.1_4673	0.431338	0.467113	0.228687	0.379961
lcl|NC_003421.2_cds_NP_588132.1_4674	0.578783	0.68884	0.32316	0.514809
lcl|NC_003421.2_cds_NP_588133.1_4675	0.471632	0.548119	0.244863	0.414037
lcl|NC_003421.2_cds_NP_588134.1_4676	0.415611	0.479876	0.23837	0.369602
lcl|NC_003421.2_cds_NP_588135.1_4677	0.412706	0.488701	0.194837	0.356962
lcl|NC_003421.2_cds_NP_588136.1_4678	0.48053	0.532499	0.263372	0.426096
lcl|NC_003421.2_cds_NP_588137.1_4679	0.443184	0.500704	0.268819	0.3985
lcl|NC_003421.2_cds_NP_588138.1_4680	0.591218	0.675304	0.361756	0.522065
lcl|NC_003421.2_cds_NP_588139.1_4681	0.676579	0.82219	0.365961	0.588037
lcl|NC_003421.2_cds_NP_588140.1_4682	0.442632	0.505663	0.259871	0.394431
lcl|NC_003421.2_cds_NP_588141.1_4683	0.502687	0.566999	0.293917	0.445053
lcl|NC_003421.2_cds_NP_588142.1_4684	0.511276	0.612005	0.264848	0.446012
lcl|NC_003421.2_cds_NP_588143.1_4685	0.585342	0.70144	0.379364	0.528842
lcl|NC_003421.2_cds_NP_588144.2_4686	0.492487	0.557819	0.290049	0.437548
lcl|NC_003421.2_cds_NP_588145.2_4687	0.448248	0.500322	0.267706	0.399521
lcl|NC_003421.2_cds_NP_588147.1_4688	0.420781	0.4763	0.24909	0.375771
lcl|NC_003421.2_cds_NP_588149.1_4690	0.472017	0.538292	0.255723	0.416339
lcl|NC_003421.2_cds_NP_588150.1_4691	0.405068	0.465152	0.20971	0.360175
lcl|NC_003421.2_cds_NP_588151.1_4692	0.466956	0.51998	0.285643	0.418328
lcl|NC_003421.2_cds_NP_588152.1_4693	0.403405	0.458633	0.229911	0.356284
lcl|NC_003421.2_cds_NP_588153.1_4694	0.483954	0.576091	0.262667	0.425358
lcl|NC_003421.2_cds_NP_588154.1_4695	0.54805	0.650058	0.314923	0.485884
lcl|NC_003421.2_cds_NP_588155.1_4696	0.439222	0.503475	0.250714	0.39105
lcl|NC_003421.2_cds_NP_588156.1_4697	0.525011	0.650385	0.256819	0.45452
lcl|NC_003421.2_cds_NP_588157.1_4698	0.424806	0.468379	0.242346	0.376143
lcl|NC_003421.2_cds_NP_588158.2_4699	0.548861	0.641315	0.341805	0.496736
lcl|NC_003421.2_cds_NP_588159.2_4700	0.429971	0.477992	0.252494	0.384835
lcl|NC_003421.2_cds_NP_588160.1_4701	0.448267	0.521054	0.251752	0.399038
lcl|NC_003421.2_cds_NP_588161.1_4702	0.462851	0.525908	0.280561	0.414882
lcl|NC_003421.2_cds_NP_588162.1_4703	0.466072	0.528008	0.257034	0.407886
lcl|NC_003421.2_cds_NP_588163.1_4704	0.399038	0.464838	0.253303	0.359957
lcl|NC_003421.2_cds_NP_588164.1_4705	0.415591	0.472668	0.238483	0.370493
lcl|NC_003421.2_cds_NP_588165.3_4707	0.473689	0.554542	0.23555	0.411451
lcl|NC_003421.2_cds_NP_588166.1_4708	0.446118	0.479345	0.272288	0.396911
lcl|NC_003421.2_cds_NP_588167.1_4709	0.443067	0.490209	0.290308	0.39804
lcl|NC_003421.2_cds_NP_588168.1_4710	0.478375	0.53687	0.275076	0.420536
lcl|NC_003421.2_cds_NP_588169.1_4711	0.442992	0.475306	0.236682	0.39062
lcl|NC_003421.2_cds_NP_588170.1_4712	0.601618	0.79339	0.332224	0.528335
lcl|NC_003421.2_cds_NP_588171.1_4713	0.399458	0.416112	0.20961	0.362454
lcl|NC_003421.2_cds_NP_588172.1_4714	0.420277	0.479938	0.220001	0.372561
lcl|NC_003421.2_cds_NP_588173.1_4716	0.407231	0.457007	0.234926	0.366495
lcl|NC_003421.2_cds_NP_588174.1_4717	0.4246	0.47252	0.303035	0.394407
lcl|NC_003421.2_cds_NP_588175.1_4718	0.432443	0.483917	0.23987	0.380694
lcl|NC_003421.2_cds_NP_588176.1_4719	0.445742	0.550688	0.221729	0.387272
lcl|NC_003421.2_cds_NP_588177.1_4720	0.427793	0.539903	0.214264	0.369015
lcl|NC_003421.2_cds_NP_588178.1_4721	0.395745	0.435441	0.223008	0.347523
lcl|NC_003421.2_cds_NP_588179.1_4722	0.447463	0.538163	0.223341	0.39174
lcl|NC_003421.2_cds_NP_588180.1_4723	0.630292	0.782984	0.373413	0.559236
lcl|NC_003421.2_cds_NP_588181.1_4724	0.643148	0.779233	0.420481	0.583901
lcl|NC_003421.2_cds_NP_588182.1_4725	0.435613	0.486151	0.2561	0.388931
lcl|NC_003421.2_cds_NP_588183.1_4726	0.412542	0.472905	0.227237	0.361526
lcl|NC_003421.2_cds_NP_588184.1_4727	0.606725	0.698836	0.36158	0.539345
lcl|NC_003421.2_cds_NP_588185.1_4728	0.414666	0.464653	0.241842	0.371364
lcl|NC_003421.2_cds_NP_588186.2_4729	0.500452	0.570868	0.253401	0.434281
lcl|NC_003421.2_cds_NP_588187.1_4730	0.45428	0.488697	0.233268	0.39968
lcl|NC_003421.2_cds_NP_588188.1_4731	0.42174	0.472886	0.219154	0.370699
lcl|NC_003421.2_cds_NP_588190.1_4732	0.65562	0.747013	0.463718	0.596308
lcl|NC_003421.2_cds_NP_588191.1_4733	0.459376	0.539745	0.234229	0.401062
lcl|NC_003421.2_cds_NP_588192.1_4734	0.428812	0.481783	0.240225	0.380011
lcl|NC_003421.2_cds_NP_588193.1_4735	0.423501	0.433217	0.237252	0.379412
lcl|NC_003421.2_cds_NP_588194.1_4736	0.466088	0.518903	0.249325	0.410454
lcl|NC_003421.2_cds_NP_588195.1_4737	0.452514	0.554371	0.233309	0.393272
lcl|NC_003421.2_cds_NP_588196.1_4738	0.417079	0.482581	0.232195	0.372246
lcl|NC_003421.2_cds_NP_588197.2_4739	0.505556	0.556475	0.271942	0.444339
lcl|NC_003421.2_cds_NP_588198.1_4740	0.429242	0.487196	0.219655	0.373958
lcl|NC_003421.2_cds_NP_588199.1_4741	0.415321	0.482765	0.272204	0.37672
lcl|NC_003421.2_cds_NP_588200.1_4742	0.40471	0.448931	0.222042	0.353873
lcl|NC_003421.2_cds_NP_588201.1_4743	0.429556	0.474914	0.218277	0.377297
lcl|NC_003421.2_cds_NP_588202.1_4744	0.427604	0.466946	0.268246	0.385602
lcl|NC_003421.2_cds_NP_588203.1_4745	0.466281	0.51472	0.25931	0.412261
lcl|NC_003421.2_cds_NP_588204.1_4746	0.407915	0.452643	0.21766	0.359142
lcl|NC_003421.2_cds_NP_588206.1_4748	0.447985	0.527389	0.267797	0.399001
lcl|NC_003421.2_cds_NP_588207.1_4749	0.431172	0.509931	0.253554	0.383364
lcl|NC_003421.2_cds_NP_588208.1_4750	0.430461	0.503221	0.237905	0.385112
lcl|NC_003421.2_cds_NP_588209.1_4752	0.475812	0.493602	0.262666	0.42384
lcl|NC_003421.2_cds_NP_588210.1_4753	0.447914	0.530119	0.261766	0.398295
lcl|NC_003421.2_cds_NP_588211.1_4754	0.441041	0.512955	0.223418	0.385269
lcl|NC_003421.2_cds_NP_588212.1_4755	0.495737	0.544719	0.278593	0.437799
lcl|NC_003421.2_cds_NP_588213.1_4757	0.454834	0.488663	0.266486	0.404778
lcl|NC_003421.2_cds_NP_588215.2_4759	0.429211	0.506312	0.227714	0.377454
lcl|NC_003421.2_cds_NP_588216.1_4760	0.514162	0.602768	0.272198	0.45106
lcl|NC_003421.2_cds_NP_588217.1_4761	0.361521	0.395365	0.165025	0.315962
lcl|NC_003421.2_cds_NP_588218.1_4762	0.493918	0.553903	0.276937	0.433087
lcl|NC_003421.2_cds_NP_588219.2_4763	0.436956	0.492032	0.235034	0.383558
lcl|NC_003421.2_cds_NP_588220.1_4764	0.422039	0.434602	0.247058	0.377725
lcl|NC_003421.2_cds_NP_588221.1_4765	0.408	0.461525	0.230924	0.360169
lcl|NC_003421.2_cds_NP_588222.1_4766	0.53085	0.634324	0.318588	0.478085
lcl|NC_003421.2_cds_NP_588223.1_4767	0.40424	0.470016	0.212368	0.351465
lcl|NC_003421.2_cds_NP_588224.1_4768	0.428228	0.484156	0.25219	0.381566
lcl|NC_003421.2_cds_NP_588225.1_4769	0.516153	0.597207	0.301187	0.458809
lcl|NC_003421.2_cds_NP_588226.1_4770	0.43125	0.49047	0.244845	0.380567
lcl|NC_003421.2_cds_NP_588227.2_4771	0.461203	0.509508	0.266974	0.40508
lcl|NC_003421.2_cds_NP_588228.1_4772	0.421201	0.471714	0.204966	0.366419
lcl|NC_003421.2_cds_NP_588229.1_4773	0.40626	0.441936	0.254705	0.3687
lcl|NC_003421.2_cds_NP_588230.1_4774	0.512505	0.613895	0.27976	0.447697
lcl|NC_003421.2_cds_NP_588231.1_4775	0.430012	0.521723	0.250785	0.380868
lcl|NC_003421.2_cds_NP_588232.1_4776	0.431793	0.437377	0.240736	0.38508
lcl|NC_003421.2_cds_NP_588234.1_4778	0.458997	0.522166	0.267655	0.40741
lcl|NC_003421.2_cds_NP_588235.1_4779	0.491084	0.547026	0.276042	0.434069
lcl|NC_003421.2_cds_NP_588236.1_4780	0.437951	0.513169	0.270987	0.39561
lcl|NC_003421.2_cds_NP_588237.1_4781	0.473354	0.525713	0.273663	0.424845
lcl|NC_003421.2_cds_NP_588239.2_4783	0.407598	0.434885	0.222497	0.363858
lcl|NC_003421.2_cds_NP_588240.1_4784	0.398306	0.438006	0.207555	0.349807
lcl|NC_003421.2_cds_NP_588241.1_4785	0.427328	0.441483	0.256667	0.384321
lcl|NC_003421.2_cds_NP_588242.1_4786	0.43255	0.489994	0.243119	0.382904
lcl|NC_003421.2_cds_NP_588243.1_4787	0.391579	0.36865	0.23241	0.35785
lcl|NC_003421.2_cds_NP_588244.1_4788	0.655228	0.825246	0.378109	0.581703
lcl|NC_003421.2_cds_NP_588245.1_4789	0.392914	0.433596	0.212223	0.344039
lcl|NC_003421.2_cds_NP_588246.1_4790	0.417914	0.471146	0.228636	0.372073
lcl|NC_003421.2_cds_NP_588247.1_4791	0.420638	0.437206	0.227407	0.368992
lcl|NC_003421.2_cds_NP_588248.3_4792	0.415038	0.464499	0.221914	0.366547
lcl|NC_003421.2_cds_NP_588249.1_4793	0.427539	0.473761	0.240611	0.379052
lcl|NC_003421.2_cds_NP_588250.1_4794	0.42646	0.455363	0.253705	0.377873
lcl|NC_003421.2_cds_NP_588251.1_4795	0.471172	0.536497	0.254049	0.417991
lcl|NC_003421.2_cds_NP_588252.1_4796	0.44638	0.518129	0.223954	0.387878
lcl|NC_003421.2_cds_NP_588254.1_4798	0.423135	0.460891	0.247914	0.380004
lcl|NC_003421.2_cds_NP_588255.1_4799	0.53606	0.622161	0.27603	0.465654
lcl|NC_003421.2_cds_NP_588256.1_4800	0.420201	0.45405	0.23738	0.375028
lcl|NC_003421.2_cds_NP_588257.1_4801	0.447064	0.491138	0.260462	0.397065
lcl|NC_003421.2_cds_NP_588258.1_4802	0.462256	0.522855	0.257029	0.409737
lcl|NC_003421.2_cds_NP_588259.1_4803	0.363457	0.357274	0.227495	0.335723
lcl|NC_003421.2_cds_NP_588260.2_4804	0.437266	0.517523	0.243092	0.386469
lcl|NC_003421.2_cds_NP_588261.1_4805	0.434162	0.465905	0.240327	0.385723
lcl|NC_003421.2_cds_NP_588262.1_4806	0.428918	0.460946	0.239776	0.380093
lcl|NC_003421.2_cds_NP_588263.2_4807	0.474659	0.537682	0.245338	0.418028
lcl|NC_003421.2_cds_NP_588264.2_4808	0.42819	0.479447	0.235502	0.379615
lcl|NC_003421.2_cds_NP_588267.1_4813	0.449074	0.496962	0.258374	0.406006
lcl|NC_003421.2_cds_NP_588268.1_4814	0.475244	0.528462	0.261967	0.415698
lcl|NC_003421.2_cds_NP_588269.1_4815	0.477812	0.533762	0.265382	0.416734
lcl|NC_003421.2_cds_NP_588270.1_4816	0.481948	0.53915	0.286681	0.430239
lcl|NC_003421.2_cds_NP_588271.1_4817	0.427344	0.489027	0.242312	0.378705
lcl|NC_003421.2_cds_NP_588273.1_4819	0.422319	0.480733	0.240754	0.374094
lcl|NC_003421.2_cds_NP_588274.1_4820	0.438895	0.503473	0.273214	0.39267
lcl|NC_003421.2_cds_NP_588275.1_4821	0.385789	0.399259	0.222283	0.34168
lcl|NC_003421.2_cds_NP_588276.2_4822	0.457946	0.526929	0.246196	0.40548
lcl|NC_003421.2_cds_NP_588277.1_4823	0.462144	0.48079	0.268874	0.413001
lcl|NC_003421.2_cds_NP_588278.2_4824	0.473001	0.502152	0.244931	0.416498
lcl|NC_003421.2_cds_NP_588279.1_4825	0.453958	0.470166	0.310179	0.417698
lcl|NC_003421.2_cds_NP_588280.1_4826	0.432184	0.545872	0.217142	0.374426
lcl|NC_003421.2_cds_NP_588281.1_4827	0.38563	0.460023	0.208743	0.339563
lcl|NC_003421.2_cds_NP_588282.1_4828	0.428546	0.469128	0.233115	0.38579
lcl|NC_003421.2_cds_NP_588283.1_4829	0.391545	0.421836	0.229217	0.349347
lcl|NC_003421.2_cds_NP_588284.1_4830	0.429928	0.482076	0.262511	0.389754
lcl|NC_003421.2_cds_NP_588285.1_4831	0.652072	0.841175	0.41539	0.586995
lcl|NC_003421.2_cds_NP_588286.1_4832	0.431948	0.470291	0.23406	0.383005
lcl|NC_003421.2_cds_NP_588287.1_4833	0.531688	0.651228	0.274306	0.464299
lcl|NC_003421.2_cds_NP_588288.2_4834	0.444956	0.474969	0.253296	0.397523
lcl|NC_003421.2_cds_NP_588289.2_4835	0.471954	0.536952	0.266131	0.416975
lcl|NC_003421.2_cds_NP_588290.1_4838	0.457336	0.482488	0.287895	0.418442
lcl|NC_003421.2_cds_NP_588291.2_4839	0.555279	0.643509	0.288119	0.483647
lcl|NC_003421.2_cds_NP_588292.1_4840	0.393366	0.435792	0.199017	0.340892
lcl|NC_003421.2_cds_NP_588293.1_4841	0.417242	0.465349	0.223467	0.367018
lcl|NC_003421.2_cds_NP_588294.1_4842	0.430947	0.403871	0.264201	0.39779
lcl|NC_003421.2_cds_NP_588296.1_4844	0.605865	0.711235	0.338262	0.53676
lcl|NC_003421.2_cds_NP_588297.1_4845	0.420868	0.502864	0.235945	0.38255
lcl|NC_003421.2_cds_NP_588298.1_4846	0.45663	0.554751	0.261835	0.406609
lcl|NC_003421.2_cds_NP_588299.1_4847	0.38214	0.382163	0.235112	0.347204
lcl|NC_003421.2_cds_NP_588300.1_4848	0.495944	0.563804	0.261335	0.432146
lcl|NC_003421.2_cds_NP_588301.2_4849	0.471584	0.523061	0.284449	0.42428
lcl|NC_003421.2_cds_NP_588302.1_4850	0.45826	0.520726	0.237158	0.404127
lcl|NC_003421.2_cds_NP_588303.1_4851	0.665474	0.837709	0.412947	0.594208
lcl|NC_003421.2_cds_NP_588304.1_4852	0.481109	0.540763	0.27117	0.425757
lcl|NC_003421.2_cds_NP_588305.1_4853	0.447929	0.540072	0.261246	0.392911
lcl|NC_003421.2_cds_NP_588307.2_4855	0.402011	0.449482	0.208151	0.351143
lcl|NC_003421.2_cds_NP_588309.1_4857	0.433847	0.486378	0.245691	0.385869
lcl|NC_003421.2_cds_NP_588310.1_4858	0.435823	0.487918	0.233661	0.384002
lcl|NC_003421.2_cds_NP_588311.1_4859	0.450633	0.532991	0.261929	0.401404
lcl|NC_003421.2_cds_NP_588312.1_4860	0.522	0.567	0.291546	0.464558
lcl|NC_003421.2_cds_NP_588313.2_4861	0.429385	0.501541	0.234277	0.376145
lcl|NC_003421.2_cds_NP_588314.2_4862	0.419864	0.477341	0.23619	0.369546
lcl|NC_003421.2_cds_NP_588315.2_4863	0.439018	0.484191	0.248564	0.392972
lcl|NC_003421.2_cds_NP_588316.1_4864	0.416979	0.502105	0.218366	0.364631
lcl|NC_003421.2_cds_NP_588317.1_4865	0.421193	0.502409	0.227744	0.371564
lcl|NC_003421.2_cds_NP_588318.1_4866	0.457296	0.528624	0.232192	0.397416
lcl|NC_003421.2_cds_NP_588319.1_4868	0.426043	0.450036	0.23139	0.378279
lcl|NC_003421.2_cds_NP_588320.1_4869	0.464018	0.500943	0.251272	0.410106
lcl|NC_003421.2_cds_NP_588321.1_4870	0.427824	0.471399	0.22188	0.375982
lcl|NC_003421.2_cds_NP_588322.2_4871	0.457339	0.574574	0.246897	0.402701
lcl|NC_003421.2_cds_NP_588323.1_4872	0.483665	0.554314	0.270619	0.427057
lcl|NC_003421.2_cds_NP_588324.1_4873	0.433332	0.479932	0.242434	0.38493
lcl|NC_003421.2_cds_NP_588325.1_4875	0.404396	0.460531	0.20556	0.350726
lcl|NC_003421.2_cds_NP_588326.2_4876	0.437834	0.49617	0.228884	0.384248
lcl|NC_003421.2_cds_NP_588327.3_4877	0.437173	0.458663	0.278601	0.398423
lcl|NC_003421.2_cds_NP_588328.1_4878	0.495416	0.600247	0.291582	0.436524
lcl|NC_003421.2_cds_NP_588329.1_4879	0.404105	0.44066	0.274536	0.365012
lcl|NC_003421.2_cds_NP_588330.1_4880	0.464564	0.500443	0.248049	0.409379
lcl|NC_003421.2_cds_NP_588332.1_4882	0.440729	0.511577	0.243214	0.389437
lcl|NC_003421.2_cds_NP_588333.1_4883	0.41712	0.440792	0.247315	0.379859
lcl|NC_003421.2_cds_NP_588334.1_4884	0.471583	0.524146	0.241487	0.414189
lcl|NC_003421.2_cds_NP_588335.2_4886	0.399447	0.43923	0.206966	0.349677
lcl|NC_003421.2_cds_NP_588336.1_4887	0.428732	0.453029	0.286363	0.395742
lcl|NC_003421.2_cds_NP_588337.1_4888	0.418986	0.488749	0.220881	0.373702
lcl|NC_003421.2_cds_NP_588338.1_4889	0.408371	0.43741	0.213856	0.363732
lcl|NC_003421.2_cds_NP_588339.1_4890	0.466581	0.520806	0.275571	0.418319
lcl|NC_003421.2_cds_NP_588340.1_4891	0.463567	0.493237	0.284784	0.415576
lcl|NC_003421.2_cds_NP_588341.1_4892	0.456473	0.490195	0.291141	0.414205
lcl|NC_003421.2_cds_NP_588342.1_4893	0.412973	0.478304	0.221075	0.363687
lcl|NC_003421.2_cds_NP_588343.1_4894	0.614059	0.67752	0.391241	0.549146
lcl|NC_003421.2_cds_NP_588344.1_4895	0.432681	0.478947	0.241434	0.384514
lcl|NC_003421.2_cds_NP_588345.1_4896	0.474312	0.532741	0.3056	0.432224
lcl|NC_003421.2_cds_NP_588346.2_4897	0.444182	0.496333	0.249957	0.396377
lcl|NC_003421.2_cds_NP_588347.1_4898	0.572948	0.694315	0.335849	0.506915
lcl|NC_003421.2_cds_NP_588348.1_4899	0.480305	0.550008	0.277115	0.42734
lcl|NC_003421.2_cds_NP_588349.1_4900	0.394271	0.469393	0.201257	0.344847
lcl|NC_003421.2_cds_NP_588350.1_4902	0.587051	0.710395	0.337667	0.513631
lcl|NC_003421.2_cds_NP_588351.1_4903	0.440331	0.489826	0.245971	0.390233
lcl|NC_003421.2_cds_NP_588352.1_4904	0.555706	0.686897	0.334063	0.49446
lcl|NC_003421.2_cds_NP_588353.1_4905	0.497489	0.599335	0.271634	0.438581
lcl|NC_003421.2_cds_NP_588354.1_4906	0.587115	0.730909	0.324553	0.516287
lcl|NC_003421.2_cds_NP_588356.1_4908	0.434118	0.457506	0.224896	0.385734
lcl|NC_003421.2_cds_NP_588358.1_4910	0.426443	0.479124	0.226334	0.377382
lcl|NC_003421.2_cds_NP_588359.2_4911	0.516744	0.563067	0.278044	0.454156
lcl|NC_003421.2_cds_NP_588360.1_4912	0.465794	0.50038	0.251826	0.413747
lcl|NC_003421.2_cds_NP_588361.1_4913	0.409269	0.459958	0.243947	0.357421
lcl|NC_003421.2_cds_NP_588362.1_4914	0.422676	0.472866	0.225188	0.373921
lcl|NC_003421.2_cds_NP_588363.2_4915	0.412499	0.445309	0.270042	0.372576
lcl|NC_003421.2_cds_NP_588364.1_4916	0.497822	0.594752	0.317222	0.451892
lcl|NC_003421.2_cds_NP_588365.1_4917	0.42115	0.483478	0.223982	0.373456
lcl|NC_003421.2_cds_NP_588366.1_4918	0.412574	0.436857	0.24131	0.374126
lcl|NC_003421.2_cds_NP_588367.1_4919	0.40869	0.451208	0.254802	0.367852
lcl|NC_003421.2_cds_NP_588368.1_4920	0.448212	0.509266	0.260782	0.400895
lcl|NC_003421.2_cds_NP_588369.1_4921	0.419045	0.450199	0.241045	0.372783
lcl|NC_003421.2_cds_NP_588370.1_4922	0.439033	0.512306	0.242453	0.388292
lcl|NC_003421.2_cds_NP_588371.3_4923	0.432613	0.480885	0.243348	0.381295
lcl|NC_003421.2_cds_NP_588373.1_4924	0.452487	0.5316	0.242756	0.397014
lcl|NC_003421.2_cds_NP_588374.1_4925	0.45046	0.497722	0.243673	0.397288
lcl|NC_003421.2_cds_NP_588375.1_4926	0.438289	0.466531	0.257883	0.391601
lcl|NC_003421.2_cds_NP_588376.1_4927	0.4499	0.503272	0.239108	0.395627
lcl|NC_003421.2_cds_NP_588377.1_4928	0.535113	0.623736	0.292589	0.466814
lcl|NC_003421.2_cds_NP_588378.1_4929	0.605368	0.70171	0.377533	0.544143
lcl|NC_003421.2_cds_NP_588379.1_4930	0.432798	0.499774	0.231274	0.38138
lcl|NC_003421.2_cds_NP_588380.2_4931	0.434363	0.464603	0.238837	0.38484
lcl|NC_003421.2_cds_NP_588381.1_4932	0.448112	0.504554	0.228936	0.393966
lcl|NC_003421.2_cds_NP_588382.1_4933	0.419062	0.512691	0.207098	0.364896
lcl|NC_003421.2_cds_NP_588383.1_4934	0.438286	0.50325	0.231397	0.386629
lcl|NC_003421.2_cds_NP_588384.1_4935	0.433023	0.476364	0.230386	0.382819
lcl|NC_003421.2_cds_NP_588385.2_4936	0.412595	0.44699	0.218593	0.36302
lcl|NC_003421.2_cds_NP_588386.1_4938	0.466768	0.510024	0.270578	0.415468
lcl|NC_003421.2_cds_NP_588387.1_4939	0.412968	0.456619	0.224973	0.361189
lcl|NC_003421.2_cds_NP_588388.1_4940	0.4231	0.466616	0.22752	0.375167
lcl|NC_003421.2_cds_NP_588389.1_4941	0.420237	0.467253	0.236731	0.370851
lcl|NC_003421.2_cds_NP_588390.1_4942	0.425871	0.460689	0.295223	0.390189
lcl|NC_003421.2_cds_NP_588391.1_4943	0.412982	0.438176	0.253153	0.372572
lcl|NC_003421.2_cds_NP_588392.1_4944	0.436898	0.502644	0.229719	0.384363
lcl|NC_003421.2_cds_NP_588393.1_4945	0.646759	0.801232	0.40376	0.57899
lcl|NC_003421.2_cds_NP_588394.2_4947	0.473782	0.558537	0.223165	0.40857
lcl|NC_003421.2_cds_NP_588395.1_4948	0.443405	0.497095	0.242474	0.387034
lcl|NC_003421.2_cds_NP_588396.1_4949	0.425414	0.473902	0.26986	0.385015
lcl|NC_003421.2_cds_NP_588397.3_4950	0.532666	0.618942	0.296797	0.469015
lcl|NC_003421.2_cds_NP_588398.1_4951	0.449068	0.485875	0.246619	0.397812
lcl|NC_003421.2_cds_NP_588399.1_4952	0.434765	0.504173	0.243434	0.384603
lcl|NC_003421.2_cds_NP_588400.2_4953	0.419412	0.463507	0.250218	0.376
lcl|NC_003421.2_cds_NP_588401.1_4954	0.482871	0.50693	0.244821	0.422312
lcl|NC_003421.2_cds_NP_588402.1_4955	0.435864	0.470141	0.237447	0.388921
lcl|NC_003421.2_cds_NP_588403.1_4956	0.46244	0.560421	0.254381	0.404917
lcl|NC_003421.2_cds_NP_588404.1_4957	0.423695	0.463297	0.261123	0.375267
lcl|NC_003421.2_cds_NP_588406.1_4959	0.441986	0.501002	0.250583	0.393639
lcl|NC_003421.2_cds_NP_588407.1_4960	0.411924	0.471599	0.226334	0.363934
lcl|NC_003421.2_cds_NP_588408.1_4961	0.412263	0.477292	0.238837	0.363641
lcl|NC_003421.2_cds_NP_588409.2_4962	0.423817	0.43543	0.227492	0.374822
lcl|NC_003421.2_cds_NP_588410.1_4963	0.45607	0.49982	0.306007	0.412261
lcl|NC_003421.2_cds_NP_588411.2_4964	0.42049	0.460827	0.239526	0.37305
lcl|NC_003421.2_cds_NP_588412.2_4965	0.448263	0.504596	0.262327	0.399884
lcl|NC_003421.2_cds_NP_588413.1_4966	0.406361	0.451124	0.213819	0.357406
lcl|NC_003421.2_cds_NP_588414.1_4967	0.440141	0.488695	0.257329	0.393438
lcl|NC_003421.2_cds_NP_588415.1_4968	0.4714	0.540522	0.28001	0.419328
lcl|NC_003421.2_cds_NP_588416.1_4969	0.555768	0.636528	0.289481	0.490304
lcl|NC_003421.2_cds_NP_588417.1_4970	0.455891	0.524313	0.231439	0.399868
lcl|NC_003421.2_cds_NP_588418.1_4971	0.502916	0.538673	0.285387	0.446434
lcl|NC_003421.2_cds_NP_588419.1_4972	0.421885	0.469834	0.238332	0.373091
lcl|NC_003421.2_cds_NP_588420.1_4973	0.443948	0.523766	0.222427	0.390265
lcl|NC_003421.2_cds_NP_588421.1_4974	0.663569	0.814586	0.380569	0.58903
lcl|NC_003421.2_cds_NP_588422.1_4975	0.429995	0.487133	0.245768	0.384447
lcl|NC_003421.2_cds_NP_588423.1_4976	0.403904	0.450942	0.224651	0.355114
lcl|NC_003421.2_cds_NP_588424.1_4977	0.571083	0.674918	0.276463	0.492706
lcl|NC_003421.2_cds_NP_588425.1_4978	0.441123	0.457786	0.244515	0.38876
lcl|NC_003421.2_cds_NP_588427.2_4980	0.530669	0.664827	0.282745	0.465869
lcl|NC_003421.2_cds_NP_588428.1_4981	0.369366	0.37954	0.212427	0.331147
lcl|NC_003421.2_cds_NP_588430.1_4983	0.63734	0.798385	0.355049	0.562599
lcl|NC_003421.2_cds_NP_588431.1_4984	0.469636	0.560049	0.262118	0.415129
lcl|NC_003421.2_cds_NP_588432.1_4985	0.413915	0.45464	0.220748	0.364542
lcl|NC_003421.2_cds_NP_588433.1_4986	0.426776	0.48035	0.247099	0.379742
lcl|NC_003421.2_cds_NP_588434.1_4987	0.434419	0.46004	0.243448	0.390206
lcl|NC_003421.2_cds_NP_588435.1_4988	0.648311	0.791533	0.404191	0.578695
lcl|NC_003421.2_cds_NP_588436.1_4989	0.656473	0.818731	0.466476	0.599545
lcl|NC_003421.2_cds_NP_588437.1_4990	0.502111	0.574611	0.290802	0.437583
lcl|NC_003421.2_cds_NP_588438.1_4991	0.6349	0.773763	0.406399	0.569948
lcl|NC_003421.2_cds_NP_588439.1_4992	0.430251	0.49495	0.265062	0.385399
lcl|NC_003421.2_cds_NP_588440.1_4993	0.429833	0.469376	0.265054	0.390627
lcl|NC_003421.2_cds_NP_588441.1_4994	0.469805	0.554876	0.259056	0.412878
lcl|NC_003421.2_cds_NP_588442.1_4995	0.433798	0.47073	0.222979	0.377828
lcl|NC_003421.2_cds_NP_588443.1_4996	0.457631	0.503944	0.2405	0.402689
lcl|NC_003421.2_cds_NP_588444.2_4997	0.39972	0.456567	0.230917	0.352832
lcl|NC_003421.2_cds_NP_588446.1_4999	0.475064	0.542279	0.236305	0.411993
lcl|NC_003421.2_cds_NP_588447.1_5000	0.44108	0.485535	0.250863	0.392823
lcl|NC_003421.2_cds_NP_588448.1_5001	0.400294	0.471907	0.25537	0.361637
lcl|NC_003421.2_cds_NP_588449.1_5002	0.462957	0.523249	0.269332	0.410208
lcl|NC_003421.2_cds_NP_588450.1_5003	0.400497	0.432524	0.216338	0.354988
lcl|NC_003421.2_cds_NP_588451.1_5004	0.495582	0.580415	0.249608	0.434383
lcl|NC_003421.2_cds_NP_588452.2_5005	0.442973	0.53204	0.211102	0.382412
lcl|NC_003421.2_cds_NP_588453.1_5006	0.426296	0.512427	0.251842	0.380888
lcl|NC_003421.2_cds_NP_588454.1_5007	0.461935	0.467815	0.26456	0.410022
lcl|NC_003421.2_cds_NP_588455.1_5008	0.454901	0.506399	0.276061	0.406522
lcl|NC_003421.2_cds_NP_588456.1_5009	0.433087	0.516194	0.243548	0.380219
lcl|NC_003421.2_cds_NP_588457.1_5010	0.427996	0.496151	0.278323	0.38312
lcl|NC_003421.2_cds_NP_588458.2_5011	0.447654	0.494165	0.277011	0.39734
lcl|NC_003421.2_cds_NP_588459.1_5012	0.492632	0.579049	0.251915	0.433028
lcl|NC_003421.2_cds_NP_588460.1_5013	0.413357	0.461669	0.221242	0.364627
lcl|NC_003421.2_cds_NP_588461.1_5014	0.446057	0.522835	0.23545	0.391956
lcl|NC_003421.2_cds_NP_588462.1_5015	0.404292	0.450244	0.234274	0.358795
lcl|NC_003421.2_cds_NP_588463.1_5016	0.41979	0.483917	0.251227	0.376191
lcl|NC_003421.2_cds_NP_588464.1_5017	0.536943	0.606293	0.282908	0.47223
lcl|NC_003421.2_cds_NP_588465.1_5018	0.43663	0.471736	0.234976	0.385212
lcl|NC_003421.2_cds_NP_588466.1_5019	0.514096	0.569119	0.279715	0.450223
lcl|NC_003421.2_cds_NP_588467.2_5020	0.444963	0.478824	0.270813	0.399743
lcl|NC_003421.2_cds_NP_588468.2_5021	0.430256	0.46981	0.253277	0.387378
lcl|NC_003421.2_cds_NP_588469.1_5022	0.440551	0.519063	0.243526	0.389767
lcl|NC_003421.2_cds_NP_588471.1_5024	0.426996	0.468779	0.252638	0.380376
lcl|NC_003421.2_cds_NP_588472.2_5025	0.445889	0.498082	0.254831	0.396457
lcl|NC_003421.2_cds_NP_588473.1_5026	0.445699	0.504612	0.243427	0.393286
lcl|NC_003421.2_cds_NP_588474.1_5027	0.385985	0.491838	0.224203	0.340169
lcl|NC_003421.2_cds_NP_588475.1_5028	0.449345	0.50266	0.256055	0.399645
lcl|NC_003421.2_cds_NP_588476.1_5029	0.482774	0.507707	0.257061	0.427429
lcl|NC_003421.2_cds_NP_588477.1_5030	0.493035	0.5112	0.266089	0.432851
lcl|NC_003421.2_cds_NP_588478.1_5031	0.506009	0.634421	0.293532	0.449796
lcl|NC_003421.2_cds_NP_588480.1_5033	0.448716	0.497989	0.236849	0.393637
lcl|NC_003421.2_cds_NP_588481.1_5034	0.430432	0.508977	0.250116	0.385262
lcl|NC_003421.2_cds_NP_588482.2_5035	0.426073	0.46209	0.224998	0.375684
lcl|NC_003421.2_cds_NP_588484.1_5036	0.409267	0.477808	0.214931	0.359705
lcl|NC_003421.2_cds_NP_588485.1_5037	0.475956	0.542253	0.261293	0.422987
lcl|NC_003421.2_cds_NP_588486.1_5038	0.434058	0.463608	0.270073	0.388146
lcl|NC_003421.2_cds_NP_588487.1_5039	0.436308	0.501919	0.250096	0.387041
lcl|NC_003421.2_cds_NP_588489.1_5041	0.439882	0.48761	0.250833	0.39008
lcl|NC_003421.2_cds_NP_588490.1_5042	0.384172	0.385249	0.212453	0.34438
lcl|NC_003421.2_cds_NP_588491.1_5043	0.499432	0.598015	0.285519	0.440702
lcl|NC_003421.2_cds_NP_588492.1_5044	0.43174	0.496546	0.242487	0.383987
lcl|NC_003421.2_cds_NP_588493.1_5045	0.389929	0.427108	0.235272	0.350147
lcl|NC_003421.2_cds_NP_588494.1_5046	0.433869	0.497505	0.223379	0.378453
lcl|NC_003421.2_cds_NP_588495.1_5047	0.400231	0.425075	0.211787	0.355179
lcl|NC_003421.2_cds_NP_588496.2_5048	0.438697	0.477833	0.264471	0.392978
lcl|NC_003421.2_cds_NP_588497.1_5049	0.429935	0.51728	0.247824	0.382642
lcl|NC_003421.2_cds_NP_588498.1_5050	0.423223	0.499171	0.240001	0.376966
lcl|NC_003421.2_cds_NP_588499.2_5051	0.411936	0.455708	0.258868	0.373718
lcl|NC_003421.2_cds_NP_588500.1_5052	0.462862	0.503294	0.276497	0.412282
lcl|NC_003421.2_cds_NP_588501.1_5053	0.502815	0.623041	0.257983	0.436927
lcl|NC_003421.2_cds_NP_588502.1_5054	0.49515	0.584961	0.298092	0.440874
lcl|NC_003421.2_cds_NP_588503.1_5055	0.444382	0.491388	0.224644	0.388088
lcl|NC_003421.2_cds_NP_588504.1_5056	0.463982	0.534358	0.251819	0.40844
lcl|NC_003421.2_cds_NP_588505.1_5057	0.499247	0.572668	0.290886	0.443733
lcl|NC_003421.2_cds_NP_588506.1_5058	0.43176	0.486582	0.225871	0.376537
lcl|NC_003421.2_cds_NP_588507.1_5059	0.429405	0.476904	0.266178	0.385302
lcl|NC_003421.2_cds_NP_588508.1_5060	0.464971	0.518536	0.269485	0.41349
lcl|NC_003421.2_cds_NP_588509.1_5061	0.426893	0.470579	0.250958	0.376237
lcl|NC_003421.2_cds_NP_588510.1_5062	0.414885	0.413023	0.24576	0.374618
lcl|NC_003421.2_cds_NP_588512.2_5063	0.431331	0.479827	0.240347	0.379982
lcl|NC_003421.2_cds_NP_588513.1_5064	0.491715	0.549318	0.310253	0.442171
lcl|NC_003421.2_cds_NP_588514.1_5065	0.441027	0.462974	0.250278	0.390293
lcl|NC_003421.2_cds_NP_588515.1_5066	0.42475	0.432666	0.242797	0.384062
lcl|NC_003421.2_cds_NP_588516.1_5067	0.434711	0.464934	0.243759	0.388694
lcl|NC_003421.2_cds_NP_588517.1_5068	0.477266	0.605667	0.282048	0.422471
lcl|NC_003421.2_cds_NP_588518.1_5069	0.455664	0.496613	0.253757	0.400384
lcl|NC_003421.2_cds_NP_588519.1_5070	0.420748	0.462723	0.239088	0.373876
lcl|NC_003421.2_cds_NP_588520.1_5071	0.404231	0.470569	0.236602	0.362269
lcl|NC_003421.2_cds_NP_588521.1_5072	0.438673	0.456081	0.234979	0.382553
lcl|NC_003421.2_cds_NP_588523.1_5074	0.507224	0.605007	0.259712	0.441207
lcl|NC_003421.2_cds_NP_588524.1_5075	0.46043	0.502875	0.252164	0.408357
lcl|NC_003421.2_cds_NP_588526.2_5076	0.440415	0.50707	0.230237	0.384441
lcl|NC_003421.2_cds_NP_588527.2_5077	0.459482	0.486232	0.237511	0.406105
lcl|NC_003421.2_cds_NP_588528.1_5078	0.451678	0.51436	0.256147	0.402941
lcl|NC_003421.2_cds_NP_588529.1_5079	0.441098	0.505327	0.241909	0.386102
lcl|NC_003421.2_cds_NP_588530.1_5080	0.428121	0.501602	0.229325	0.378714
lcl|NC_003421.2_cds_NP_588531.1_5081	0.466908	0.541104	0.270727	0.411905
lcl|NC_003421.2_cds_NP_588532.1_5082	0.411919	0.479128	0.227395	0.364965
lcl|NC_003421.2_cds_NP_588533.1_5083	0.436504	0.476089	0.247992	0.385939
lcl|NC_003421.2_cds_NP_588534.1_5084	0.437634	0.51087	0.251098	0.3886
lcl|NC_003421.2_cds_NP_588535.2_5085	0.44765	0.472151	0.264817	0.39969
lcl|NC_003421.2_cds_NP_588536.1_5086	0.489789	0.588759	0.269811	0.428835
lcl|NC_003421.2_cds_NP_588537.1_5087	0.468535	0.525633	0.266919	0.416892
lcl|NC_003421.2_cds_NP_588538.1_5088	0.424273	0.504959	0.258534	0.37533
lcl|NC_003421.2_cds_NP_588539.1_5090	0.484245	0.532777	0.254734	0.42593
lcl|NC_003421.2_cds_NP_588540.1_5091	0.409524	0.464312	0.235515	0.364529
lcl|NC_003421.2_cds_NP_588543.1_5093	0.476906	0.512478	0.289361	0.42729
lcl|NC_003421.2_cds_NP_588544.1_5094	0.399128	0.420943	0.242168	0.362076
lcl|NC_003421.2_cds_NP_588545.1_5095	0.438481	0.399772	0.298089	0.390823
lcl|NC_003421.2_cds_NP_588546.2_5096	0.408519	0.471759	0.232839	0.360256
lcl|NC_003421.2_cds_NP_588547.1_5097	0.454786	0.530876	0.23138	0.397331
lcl|NC_003421.2_cds_NP_588548.2_5098	0.477174	0.548613	0.257771	0.419498
lcl|NC_003421.2_cds_NP_588551.1_5101	0.47046	0.509348	0.263463	0.421025
lcl|NC_003421.2_cds_NP_588552.1_5102	0.543852	0.619348	0.306437	0.478001
lcl|NC_003421.2_cds_NP_588554.2_5103	0.422435	0.481585	0.216333	0.373084
lcl|NC_003421.2_cds_NP_588555.1_5104	0.426109	0.460777	0.248973	0.379971
lcl|NC_003421.2_cds_NP_588556.1_5105	0.397057	0.46482	0.208275	0.347179
lcl|NC_003421.2_cds_NP_588557.1_5106	0.449875	0.456325	0.258939	0.398203
lcl|NC_003421.2_cds_NP_588558.1_5107	0.454826	0.546517	0.229331	0.396079
lcl|NC_003421.2_cds_NP_588559.1_5108	0.44275	0.49678	0.262229	0.396218
lcl|NC_003421.2_cds_NP_588560.1_5109	0.392399	0.42474	0.269092	0.358539
lcl|NC_003421.2_cds_NP_588561.1_5110	0.537638	0.630778	0.335294	0.480366
lcl|NC_003421.2_cds_NP_588562.1_5111	0.635295	0.737917	0.425599	0.572752
lcl|NC_003421.2_cds_NP_588563.1_5112	0.461378	0.526796	0.238912	0.39833
lcl|NC_003421.2_cds_NP_588564.1_5113	0.45381	0.50971	0.268142	0.407095
lcl|NC_003421.2_cds_NP_588566.1_5116	0.430027	0.486492	0.23868	0.37935
lcl|NC_003421.2_cds_NP_588567.1_5117	0.444987	0.530843	0.215955	0.384789
lcl|NC_003421.2_cds_NP_588568.1_5118	0.445272	0.497061	0.238518	0.39064
lcl|NC_003421.2_cds_NP_588569.1_5119	0.41542	0.48758	0.238595	0.367318
lcl|NC_003421.2_cds_NP_588570.2_5120	0.479024	0.527329	0.273599	0.424946
lcl|NC_003421.2_cds_NP_588571.1_5121	0.4147	0.538624	0.185368	0.352706
lcl|NC_003421.2_cds_NP_588572.1_5122	0.41597	0.431161	0.247332	0.371792
lcl|NC_003423.3_cds_NP_001018762.2_2348	0.464086	0.543623	0.244798	0.404515
lcl|NC_003423.3_cds_NP_001018763.1_2349	0.420612	0.45061	0.240837	0.373277
lcl|NC_003423.3_cds_NP_001018764.1_2350	0.421229	0.455067	0.243664	0.374943
lcl|NC_003423.3_cds_NP_001018765.1_2351	0.407814	0.464122	0.213865	0.357328
lcl|NC_003423.3_cds_NP_001018766.1_2352	0.417777	0.419176	0.246646	0.370541
lcl|NC_003423.3_cds_NP_001018767.1_2353	0.400429	0.433161	0.218675	0.35406
lcl|NC_003423.3_cds_NP_001018769.2_2354	0.47237	0.512655	0.272079	0.420872
lcl|NC_003423.3_cds_NP_001018770.1_2358	0.427458	0.471961	0.241465	0.380161
lcl|NC_003423.3_cds_NP_001018771.1_2359	0.382671	0.464533	0.191539	0.328739
lcl|NC_003423.3_cds_NP_001018772.1_2360	0.428255	0.485855	0.228981	0.37556
lcl|NC_003423.3_cds_NP_001018773.1_2361	0.477559	0.515515	0.268052	0.418554
lcl|NC_003423.3_cds_NP_001018780.2_2495	0.428823	0.510565	0.232103	0.377455
lcl|NC_003423.3_cds_NP_001018786.1_2762	0.378792	0.440642	0.211345	0.330551
lcl|NC_003423.3_cds_NP_001018789.2_2833	0.578867	0.727375	0.34806	0.513403
lcl|NC_003423.3_cds_NP_001018791.2_2859	0.488185	0.621883	0.22681	0.421385
lcl|NC_003423.3_cds_NP_001018794.2_2901	0.414486	0.461197	0.195913	0.35709
lcl|NC_003423.3_cds_NP_001018800.2_3055	0.400276	0.459995	0.227183	0.350022
lcl|NC_003423.3_cds_NP_001018806.1_3129	0.425777	0.489409	0.251604	0.381296
lcl|NC_003423.3_cds_NP_001018808.1_3182	0.415419	0.529019	0.289508	0.364718
lcl|NC_003423.3_cds_NP_001018812.1_3294	0.428235	0.451967	0.226862	0.375213
lcl|NC_003423.3_cds_NP_001018813.2_3311	0.551172	0.653102	0.325389	0.484681
lcl|NC_003423.3_cds_NP_001018815.2_3339	0.387251	0.438938	0.198393	0.339565
lcl|NC_003423.3_cds_NP_001018819.2_3388	0.432099	0.494715	0.2367	0.380199
lcl|NC_003423.3_cds_NP_001018822.1_3406	0.445232	0.492669	0.274844	0.400802
lcl|NC_003423.3_cds_NP_001018823.1_3407	0.421759	0.463136	0.230119	0.371232
lcl|NC_003423.3_cds_NP_001018829.2_3547	0.452829	0.539053	0.24517	0.397004
lcl|NC_003423.3_cds_NP_001018832.1_3606	0.431073	0.48292	0.238982	0.37989
lcl|NC_003423.3_cds_NP_001018835.1_3658	0.401582	0.442602	0.236985	0.357844
lcl|NC_003423.3_cds_NP_001018836.1_3680	0.439989	0.484024	0.244441	0.388994
lcl|NC_003423.3_cds_NP_001018837.1_3692	0.432641	0.477395	0.272451	0.388652
lcl|NC_003423.3_cds_NP_001018840.1_3826	0.427611	0.499128	0.211619	0.374776
lcl|NC_003423.3_cds_NP_001018845.2_4035	0.659831	0.844474	0.421518	0.591462
lcl|NC_003423.3_cds_NP_001018846.1_4048	0.430661	0.453615	0.247968	0.384205
lcl|NC_003423.3_cds_NP_001018848.1_4073	0.594951	0.725327	0.321993	0.521999
lcl|NC_003423.3_cds_NP_001019056.3_4101	0.41862	0.438369	0.232327	0.377226
lcl|NC_003423.3_cds_NP_001342702.1_3628	0.51523	0.601051	0.253697	0.44611
lcl|NC_003423.3_cds_NP_001342703.1_3113	0.40992	0.440626	0.232321	0.36474
lcl|NC_003423.3_cds_NP_001342704.1_4121	0.440016	0.488224	0.253654	0.393111
lcl|NC_003423.3_cds_NP_001342705.1_4106	0.40779	0.452218	0.232835	0.357799
lcl|NC_003423.3_cds_NP_001342706.1_2864	0.429256	0.497791	0.254985	0.384009
lcl|NC_003423.3_cds_NP_001342707.1_4144	0.480906	0.556844	0.240494	0.416177
lcl|NC_003423.3_cds_NP_001342708.1_4139	0.492487	0.605124	0.306343	0.44521
lcl|NC_003423.3_cds_NP_001342709.1_3408	0.429566	0.482914	0.225141	0.376809
lcl|NC_003423.3_cds_NP_001342710.1_3285	0.398166	0.431967	0.248919	0.356356
lcl|NC_003423.3_cds_NP_001342711.1_3289	0.457394	0.516551	0.241089	0.400204
lcl|NC_003423.3_cds_NP_001342712.1_2551	0.672884	0.798864	0.397453	0.598526
lcl|NC_003423.3_cds_NP_001342713.1_2872	0.471832	0.513459	0.223871	0.405176
lcl|NC_003423.3_cds_NP_001342714.1_2885	0.412993	0.445661	0.222417	0.363349
lcl|NC_003423.3_cds_NP_001342715.1_3260	0.416134	0.446678	0.254502	0.372506
lcl|NC_003423.3_cds_NP_001342716.1_3251	0.425534	0.510748	0.227973	0.372063
lcl|NC_003423.3_cds_NP_001342717.1_2608	0.569496	0.732939	0.322072	0.501543
lcl|NC_003423.3_cds_NP_001342718.1_3731	0.450975	0.517437	0.239811	0.391405
lcl|NC_003423.3_cds_NP_001342719.1_3042	0.41455	0.487547	0.222407	0.365965
lcl|NC_003423.3_cds_NP_001342720.1_3050	0.407738	0.445224	0.218931	0.358956
lcl|NC_003423.3_cds_NP_001342721.1_3230	0.406883	0.437284	0.248925	0.364759
lcl|NC_003423.3_cds_NP_001342726.1_4086	0.532903	0.619538	0.295845	0.469441
lcl|NC_003423.3_cds_NP_001342727.1_2658	0.444516	0.487485	0.238296	0.390962
lcl|NC_003423.3_cds_NP_001342731.1_3753	0.402718	0.433077	0.222399	0.353704
lcl|NC_003423.3_cds_NP_001342735.1_3472	0.409758	0.449955	0.263275	0.368709
lcl|NC_003423.3_cds_NP_001342738.1_2532	0.372468	0.355809	0.220177	0.339606
lcl|NC_003423.3_cds_NP_001342739.1_2535	0.414687	0.430707	0.2478	0.372342
lcl|NC_003423.3_cds_NP_001342740.1_3120	0.425474	0.467883	0.245817	0.380344
lcl|NC_003423.3_cds_NP_001342743.1_3086	0.44906	0.538812	0.227417	0.389318
lcl|NC_003423.3_cds_NP_001342747.1_3707	0.440687	0.490812	0.25988	0.394085
lcl|NC_003423.3_cds_NP_001342751.1_3725	0.410725	0.457925	0.234013	0.363712
lcl|NC_003423.3_cds_NP_001342754.1_3437	0.452212	0.538852	0.231198	0.392264
lcl|NC_003423.3_cds_NP_001342759.1_3275	0.580131	0.702885	0.325913	0.508732
lcl|NC_003423.3_cds_NP_001342760.1_3282	0.426056	0.497903	0.242514	0.379029
lcl|NC_003423.3_cds_NP_001342761.1_3284	0.421537	0.466959	0.242397	0.373098
lcl|NC_003423.3_cds_NP_001342762.1_3565	0.408237	0.455965	0.240174	0.366188
lcl|NC_003423.3_cds_NP_001342766.1_2766	0.391479	0.435736	0.224865	0.350474
lcl|NC_003423.3_cds_NP_001342767.1_3387	0.432023	0.467537	0.244429	0.385654
lcl|NC_003423.3_cds_NP_001342768.1_2745	0.429279	0.498034	0.227716	0.37686
lcl|NC_003423.3_cds_NP_001342770.1_3844	0.421936	0.496358	0.232451	0.372086
lcl|NC_003423.3_cds_NP_001342771.1_3847	0.465012	0.498395	0.258697	0.408703
lcl|NC_003423.3_cds_NP_001342772.1_3864	0.44151	0.515198	0.254042	0.389994
lcl|NC_003423.3_cds_NP_001342773.1_3386	0.429832	0.443519	0.24494	0.381102
lcl|NC_003423.3_cds_NP_001342774.1_2448	0.423603	0.498534	0.217119	0.372607
lcl|NC_003423.3_cds_NP_001342775.1_2813	0.436957	0.476626	0.292806	0.394472
lcl|NC_003423.3_cds_NP_001342776.1_2821	0.506085	0.573033	0.304268	0.451395
lcl|NC_003423.3_cds_NP_001342777.1_2455	0.441583	0.501955	0.255394	0.393792
lcl|NC_003423.3_cds_NP_001342778.1_2513	0.428184	0.515776	0.235803	0.37878
lcl|NC_003423.3_cds_NP_001342779.1_3944	0.483234	0.563601	0.269366	0.426015
lcl|NC_003423.3_cds_NP_001342780.1_3373	0.427506	0.510221	0.227723	0.374169
lcl|NC_003423.3_cds_NP_001342784.1_2414	0.419828	0.475821	0.233569	0.371631
lcl|NC_003423.3_cds_NP_001342789.1_2689	0.455446	0.538368	0.255053	0.401837
lcl|NC_003423.3_cds_NP_001342790.1_2690	0.493709	0.542027	0.274168	0.437727
lcl|NC_003423.3_cds_NP_001342791.1_2694	0.41213	0.465253	0.221774	0.362513
lcl|NC_003423.3_cds_NP_001342792.1_3655	0.381427	0.439715	0.216692	0.33647
lcl|NC_003423.3_cds_NP_001342826.1_3688	0.52845	0.654543	0.278427	0.461601
lcl|NC_003423.3_cds_NP_001342827.1_3906	0.426202	0.49305	0.223305	0.373654
lcl|NC_003423.3_cds_NP_001342831.1_3016	0.424021	0.454199	0.258999	0.382228
lcl|NC_003423.3_cds_NP_001342832.1_3603	0.456317	0.52183	0.227246	0.396506
lcl|NC_003423.3_cds_NP_001342834.1_3028	0.402404	0.428242	0.260984	0.364027
lcl|NC_003423.3_cds_NP_001342874.1_3109	0.579381	0.620948	0.375697	0.526582
lcl|NC_003423.3_cds_NP_001342875.1_3660	0.400228	0.424715	0.231969	0.359097
lcl|NC_003423.3_cds_NP_001342877.1_4026	0.439228	0.474907	0.226132	0.385596
lcl|NC_003423.3_cds_NP_001342878.1_4028	0.397462	0.443439	0.252677	0.360399
lcl|NC_003423.3_cds_NP_001342880.1_3466	0.500335	0.621702	0.268419	0.438937
lcl|NC_003423.3_cds_NP_001342881.1_3618	0.455647	0.503588	0.239123	0.400865
lcl|NC_003423.3_cds_NP_001342889.1_3352	0.486995	0.575368	0.288785	0.430285
lcl|NC_003423.3_cds_NP_001342890.1_3359	0.453011	0.465189	0.285165	0.409881
lcl|NC_003423.3_cds_NP_001342891.1_2487	0.505514	0.606226	0.285067	0.445882
lcl|NC_003423.3_cds_NP_001342892.1_2558	0.42021	0.483844	0.229519	0.371364
lcl|NC_003423.3_cds_NP_001342893.1_2575	0.444158	0.503892	0.266649	0.396695
lcl|NC_003423.3_cds_NP_001342894.1_3793	0.464405	0.489243	0.259578	0.415923
lcl|NC_003423.3_cds_NP_001342895.1_3794	0.408676	0.477849	0.215246	0.354019
lcl|NC_003423.3_cds_NP_001342904.1_2792	0.437633	0.506359	0.236878	0.385497
lcl|NC_003423.3_cds_NP_001342907.1_4049	0.42752	0.434547	0.246706	0.378008
lcl|NC_003423.3_cds_NP_001342922.1_3343	0.465464	0.504786	0.263512	0.409253
lcl|NC_003423.3_cds_NP_001342923.1_3344	0.442849	0.483462	0.236007	0.390468
lcl|NC_003423.3_cds_NP_001342930.1_2518	0.413132	0.449014	0.219206	0.367238
lcl|NC_003423.3_cds_NP_001342944.1_3770	0.429272	0.493435	0.209253	0.37271
lcl|NC_003423.3_cds_NP_001342945.1_3915	0.438319	0.477557	0.247367	0.394752
lcl|NC_003423.3_cds_NP_001342954.1_2697	0.505703	0.617422	0.237233	0.433449
lcl|NC_003423.3_cds_NP_001342955.1_2706	0.453605	0.563672	0.214393	0.390788
lcl|NC_003423.3_cds_NP_001342956.1_3205	0.406258	0.49076	0.195757	0.346799
lcl|NC_003423.3_cds_NP_001342958.1_3588	0.444494	0.439058	0.306556	0.399338
lcl|NC_003423.3_cds_NP_001342959.1_3589	0.449785	0.502915	0.264408	0.399708
lcl|NC_003423.3_cds_NP_001342962.1_2375	0.399046	0.453309	0.207093	0.351738
lcl|NC_003423.3_cds_NP_001342963.1_2397	0.428167	0.483043	0.226936	0.376382
lcl|NC_003423.3_cds_NP_001342964.1_2371	0.429761	0.480059	0.231994	0.379359
lcl|NC_003423.3_cds_NP_001342970.1_2431	0.467804	0.528892	0.314419	0.423804
lcl|NC_003423.3_cds_NP_001342971.1_4124	0.425869	0.480825	0.247996	0.377438
lcl|NC_003423.3_cds_NP_001342972.1_4131	0.426862	0.511252	0.209547	0.370553
lcl|NC_003423.3_cds_NP_001342974.1_2959	0.461851	0.484007	0.248582	0.410861
lcl|NC_003423.3_cds_NP_001342975.1_3307	0.441803	0.522531	0.243742	0.392399
lcl|NC_003423.3_cds_NP_001342979.1_3499	0.431244	0.5158	0.245309	0.38237
lcl|NC_003423.3_cds_NP_001342980.1_2672	0.446305	0.523813	0.231363	0.391178
lcl|NC_003423.3_cds_NP_001342981.1_3097	0.43301	0.449255	0.265733	0.387447
lcl|NC_003423.3_cds_NP_001342983.1_3143	0.413641	0.515275	0.180781	0.360511
lcl|NC_003423.3_cds_NP_001342989.1_2905	0.441698	0.514794	0.242803	0.388871
lcl|NC_003423.3_cds_NP_001342990.1_2908	0.411447	0.435708	0.225135	0.360655
lcl|NC_003423.3_cds_NP_001342993.1_2918	0.457703	0.51754	0.261146	0.408165
lcl|NC_003423.3_cds_NP_001342994.1_2933	0.420187	0.522118	0.208506	0.366607
lcl|NC_003423.3_cds_NP_001342995.1_2936	0.450803	0.511324	0.241046	0.396518
lcl|NC_003423.3_cds_NP_001343003.1_3665	0.437745	0.505838	0.243115	0.382837
lcl|NC_003423.3_cds_NP_001343005.1_3519	0.412108	0.467566	0.263508	0.368676
lcl|NC_003423.3_cds_NP_001343007.1_2522	0.435172	0.519481	0.247596	0.386556
lcl|NC_003423.3_cds_NP_001343008.1_2683	0.432061	0.46739	0.223778	0.380703
lcl|NC_003423.3_cds_NP_001343013.1_2847	0.426064	0.408052	0.251341	0.37953
lcl|NC_003423.3_cds_NP_001343014.1_3996	0.385893	0.39985	0.196419	0.339499
lcl|NC_003423.3_cds_NP_001343017.1_4032	0.41717	0.468245	0.231239	0.369804
lcl|NC_003423.3_cds_NP_001343021.1_2784	0.400706	0.437576	0.22507	0.355811
lcl|NC_003423.3_cds_NP_001343022.1_3268	0.39509	0.439172	0.249231	0.357548
lcl|NC_003423.3_cds_NP_001343023.1_2856	0.400027	0.441878	0.239644	0.356491
lcl|NC_003423.3_cds_NP_001343025.1_2913	0.420538	0.471108	0.238306	0.371283
lcl|NC_003423.3_cds_NP_001343041.1_2346	0.402407	0.467325	0.222631	0.35439
lcl|NC_003423.3_cds_NP_001343042.1_2347	0.431164	0.490661	0.181752	0.360861
lcl|NC_003423.3_cds_NP_001343043.1_2355	0.409861	0.492321	0.222534	0.359438
lcl|NC_003423.3_cds_NP_001343044.1_2724	0.412201	0.4275	0.256607	0.37197
lcl|NC_003423.3_cds_NP_001343045.1_3412	0.412095	0.473111	0.243526	0.363683
lcl|NC_003423.3_cds_NP_001343046.1_3577	0.446706	0.514908	0.247867	0.395976
lcl|NC_003423.3_cds_NP_001343047.1_4199	0.43455	0.501768	0.257901	0.383426
lcl|NC_003423.3_cds_NP_001343048.1_4200	0.398642	0.408432	0.202502	0.348421
lcl|NC_003423.3_cds_NP_001343049.1_2335	0.42186	0.485294	0.191965	0.359458
lcl|NC_003423.3_cds_NP_001343050.1_4202	0.435729	0.50115	0.259478	0.38394
lcl|NC_003423.3_cds_NP_001343051.1_4203	0.413167	0.454747	0.227908	0.368355
lcl|NC_003423.3_cds_NP_001343083.1_2695	0.45353	0.570894	0.241666	0.405386
lcl|NC_003423.3_cds_NP_001343084.1_3378	0.448252	0.50408	0.244345	0.393861
lcl|NC_003423.3_cds_NP_001343085.1_3945	0.39726	0.406445	0.249304	0.362992
lcl|NC_003423.3_cds_NP_001343086.1_3976	0.41947	0.465	0.222072	0.371641
lcl|NC_003423.3_cds_NP_001343087.1_4132	0.440203	0.523989	0.267396	0.397261
lcl|NC_003423.3_cds_NP_001343088.1_4177	0.410633	0.507787	0.195097	0.360339
lcl|NC_003423.3_cds_NP_001343139.1_2356	0.416137	0.414053	0.269898	0.377658
lcl|NC_003423.3_cds_NP_001343140.1_2357	0.411832	0.459715	0.201769	0.355874
lcl|NC_003423.3_cds_NP_001343141.1_2531	0.351964	0.342203	0.221369	0.320394
lcl|NC_003423.3_cds_NP_001343142.1_2560	0.372716	0.44007	0.221838	0.323699
lcl|NC_003423.3_cds_NP_001343143.1_2562	0.372082	0.429726	0.19539	0.327247
lcl|NC_003423.3_cds_NP_001343144.1_2633	0.386227	0.462724	0.222192	0.336106
lcl|NC_003423.3_cds_NP_001343145.1_2650	0.375568	0.391474	0.214308	0.332157
lcl|NC_003423.3_cds_NP_001343146.1_2670	0.396658	0.499905	0.18915	0.347272
lcl|NC_003423.3_cds_NP_001343147.1_2696	0.403432	0.472262	0.252193	0.357953
lcl|NC_003423.3_cds_NP_001343148.1_2785	0.432782	0.508164	0.212704	0.379199
lcl|NC_003423.3_cds_NP_001343149.1_2848	0.444934	0.407991	0.244785	0.406454
lcl|NC_003423.3_cds_NP_001343150.1_2880	0.398271	0.407302	0.263431	0.361757
lcl|NC_003423.3_cds_NP_001343151.1_2916	0.397858	0.386884	0.227534	0.357504
lcl|NC_003423.3_cds_NP_001343152.1_2985	0.439485	0.494479	0.259567	0.388397
lcl|NC_003423.3_cds_NP_001343153.1_2992	0.376539	0.421124	0.226644	0.334574
lcl|NC_003423.3_cds_NP_001343154.1_3014	0.517375	0.625255	0.27049	0.452958
lcl|NC_003423.3_cds_NP_001343155.1_3076	0.391351	0.418978	0.207527	0.344637
lcl|NC_003423.3_cds_NP_001343156.1_3110	0.411336	0.500688	0.232143	0.37084
lcl|NC_003423.3_cds_NP_001343157.1_3131	0.388418	0.398406	0.259917	0.358094
lcl|NC_003423.3_cds_NP_001343158.1_3196	0.391623	0.401046	0.240437	0.356502
lcl|NC_003423.3_cds_NP_001343159.1_3228	0.422902	0.452967	0.263726	0.379539
lcl|NC_003423.3_cds_NP_001343160.1_3281	0.444017	0.508249	0.23569	0.38784
lcl|NC_003423.3_cds_NP_001343161.1_3298	0.537031	0.582174	0.274415	0.468192
lcl|NC_003423.3_cds_NP_001343162.1_3411	0.359308	0.415257	0.18939	0.317315
lcl|NC_003423.3_cds_NP_001343163.1_3442	0.445014	0.564813	0.189483	0.376616
lcl|NC_003423.3_cds_NP_001343164.1_3468	0.372888	0.347207	0.247152	0.341956
lcl|NC_003423.3_cds_NP_001343165.1_3477	0.407924	0.492918	0.213262	0.351257
lcl|NC_003423.3_cds_NP_001343166.1_3541	0.383758	0.400426	0.24051	0.338152
lcl|NC_003423.3_cds_NP_001343167.1_3604	0.440513	0.469253	0.249041	0.388981
lcl|NC_003423.3_cds_NP_001343168.1_3676	0.468415	0.528061	0.242982	0.411025
lcl|NC_003423.3_cds_NP_001343169.1_3715	0.519526	0.531763	0.305054	0.461217
lcl|NC_003423.3_cds_NP_001343170.1_3782	0.392015	0.420066	0.269148	0.364555
lcl|NC_003423.3_cds_NP_001343171.1_3795	0.410074	0.544833	0.214803	0.367424
lcl|NC_003423.3_cds_NP_001343172.1_3832	0.427584	0.490542	0.19722	0.361653
lcl|NC_003423.3_cds_NP_001343173.1_3887	0.376508	0.424436	0.219175	0.338008
lcl|NC_003423.3_cds_NP_001343174.1_4041	0.539858	0.630503	0.297216	0.481538
lcl|NC_003423.3_cds_NP_001343175.1_4201	0.42186	0.485294	0.191965	0.359458
lcl|NC_003423.3_cds_NP_592763.1_2336	0.43455	0.501768	0.257901	0.383426
lcl|NC_003423.3_cds_NP_592764.1_2337	0.408274	0.470052	0.215375	0.356976
lcl|NC_003423.3_cds_NP_592765.1_2338	0.371566	0.418507	0.205508	0.326073
lcl|NC_003423.3_cds_NP_592766.1_2339	0.396653	0.429565	0.174916	0.341713
lcl|NC_003423.3_cds_NP_592767.1_2340	0.39614	0.438683	0.210305	0.344441
lcl|NC_003423.3_cds_NP_592768.1_2341	0.402956	0.451723	0.200668	0.351878
lcl|NC_003423.3_cds_NP_592769.1_2342	0.443014	0.513915	0.250779	0.388607
lcl|NC_003423.3_cds_NP_592770.1_2343	0.429387	0.481765	0.211336	0.372271
lcl|NC_003423.3_cds_NP_592771.1_2344	0.417917	0.468238	0.241279	0.369962
lcl|NC_003423.3_cds_NP_592772.1_2345	0.447402	0.494027	0.219841	0.392227
lcl|NC_003423.3_cds_NP_595045.1_2362	0.444149	0.504295	0.234993	0.390032
lcl|NC_003423.3_cds_NP_595046.1_2363	0.416114	0.450252	0.233535	0.36595
lcl|NC_003423.3_cds_NP_595047.1_2364	0.401894	0.44648	0.221392	0.355466
lcl|NC_003423.3_cds_NP_595048.1_2365	0.401894	0.44648	0.221392	0.355466
lcl|NC_003423.3_cds_NP_595049.1_2366	0.401894	0.44648	0.221392	0.355466
lcl|NC_003423.3_cds_NP_595050.1_2367	0.401894	0.44648	0.221392	0.355466
lcl|NC_003423.3_cds_NP_595051.2_2368	0.464172	0.508208	0.244525	0.403879
lcl|NC_003423.3_cds_NP_595052.1_2369	0.43731	0.473708	0.239683	0.382629
lcl|NC_003423.3_cds_NP_595053.1_2370	0.460581	0.518329	0.231689	0.40057
lcl|NC_003423.3_cds_NP_595055.1_2372	0.413778	0.466101	0.227726	0.363872
lcl|NC_003423.3_cds_NP_595056.1_2373	0.452688	0.51708	0.228673	0.393935
lcl|NC_003423.3_cds_NP_595057.1_2374	0.529446	0.665069	0.254848	0.457156
lcl|NC_003423.3_cds_NP_595059.1_2376	0.399435	0.422914	0.223303	0.353298
lcl|NC_003423.3_cds_NP_595060.1_2377	0.429134	0.488451	0.231441	0.378609
lcl|NC_003423.3_cds_NP_595061.1_2378	0.464771	0.547929	0.241057	0.403096
lcl|NC_003423.3_cds_NP_595062.1_2379	0.435117	0.447895	0.261629	0.386753
lcl|NC_003423.3_cds_NP_595063.1_2380	0.4433	0.502906	0.241897	0.392612
lcl|NC_003423.3_cds_NP_595064.1_2381	0.464169	0.524551	0.25783	0.407764
lcl|NC_003423.3_cds_NP_595065.1_2382	0.424711	0.470145	0.234744	0.373951
lcl|NC_003423.3_cds_NP_595066.1_2383	0.40881	0.418511	0.246196	0.366153
lcl|NC_003423.3_cds_NP_595067.1_2384	0.438397	0.471002	0.264312	0.390291
lcl|NC_003423.3_cds_NP_595068.1_2385	0.442283	0.516473	0.249752	0.38925
lcl|NC_003423.3_cds_NP_595069.1_2386	0.411959	0.478291	0.207473	0.358867
lcl|NC_003423.3_cds_NP_595070.1_2387	0.465104	0.521043	0.2424	0.408215
lcl|NC_003423.3_cds_NP_595071.1_2388	0.457138	0.536933	0.23965	0.400035
lcl|NC_003423.3_cds_NP_595072.1_2389	0.442916	0.48902	0.245298	0.39031
lcl|NC_003423.3_cds_NP_595073.1_2390	0.427047	0.498664	0.231391	0.376565
lcl|NC_003423.3_cds_NP_595074.1_2391	0.480625	0.557003	0.320232	0.437198
lcl|NC_003423.3_cds_NP_595075.1_2392	0.455481	0.509698	0.21952	0.393097
lcl|NC_003423.3_cds_NP_595076.2_2393	0.476024	0.545783	0.211411	0.405875
lcl|NC_003423.3_cds_NP_595077.2_2394	0.515733	0.594304	0.277238	0.451437
lcl|NC_003423.3_cds_NP_595078.1_2395	0.394446	0.420041	0.205798	0.348984
lcl|NC_003423.3_cds_NP_595079.1_2396	0.377915	0.419534	0.221787	0.336526
lcl|NC_003423.3_cds_NP_595081.1_2398	0.410932	0.433165	0.243656	0.364285
lcl|NC_003423.3_cds_NP_595082.1_2399	0.478814	0.520242	0.253484	0.419974
lcl|NC_003423.3_cds_NP_595083.2_2400	0.478178	0.534359	0.257708	0.41898
lcl|NC_003423.3_cds_NP_595084.1_2401	0.537356	0.565601	0.286773	0.46881
lcl|NC_003423.3_cds_NP_595085.1_2402	0.509305	0.513071	0.212976	0.431457
lcl|NC_003423.3_cds_NP_595086.1_2403	0.465252	0.520994	0.244771	0.409385
lcl|NC_003423.3_cds_NP_595087.2_2404	0.418376	0.468424	0.23021	0.369812
lcl|NC_003423.3_cds_NP_595088.1_2405	0.391324	0.381925	0.191227	0.345959
lcl|NC_003423.3_cds_NP_595089.1_2406	0.435694	0.474369	0.246898	0.384381
lcl|NC_003423.3_cds_NP_595090.2_2407	0.544004	0.614206	0.319192	0.478512
lcl|NC_003423.3_cds_NP_595091.1_2408	0.454926	0.517969	0.228461	0.39552
lcl|NC_003423.3_cds_NP_595092.1_2409	0.46615	0.516105	0.259114	0.410846
lcl|NC_003423.3_cds_NP_595093.1_2410	0.39481	0.440751	0.219937	0.349789
lcl|NC_003423.3_cds_NP_595094.1_2411	0.459496	0.471024	0.225328	0.40659
lcl|NC_003423.3_cds_NP_595095.1_2412	0.633954	0.804442	0.351427	0.556962
lcl|NC_003423.3_cds_NP_595096.1_2413	0.430027	0.508184	0.213795	0.380639
lcl|NC_003423.3_cds_NP_595098.1_2415	0.473824	0.513982	0.267817	0.418032
lcl|NC_003423.3_cds_NP_595099.1_2416	0.432774	0.47087	0.23108	0.377899
lcl|NC_003423.3_cds_NP_595100.2_2417	0.414054	0.454812	0.260162	0.37336
lcl|NC_003423.3_cds_NP_595101.1_2418	0.418161	0.472529	0.263525	0.375461
lcl|NC_003423.3_cds_NP_595102.2_2419	0.443495	0.469335	0.250528	0.395415
lcl|NC_003423.3_cds_NP_595103.1_2420	0.431897	0.457855	0.274051	0.393329
lcl|NC_003423.3_cds_NP_595104.1_2421	0.424813	0.462637	0.215181	0.371405
lcl|NC_003423.3_cds_NP_595105.1_2422	0.606297	0.675453	0.422681	0.54883
lcl|NC_003423.3_cds_NP_595106.1_2423	0.515147	0.608596	0.269808	0.452188
lcl|NC_003423.3_cds_NP_595107.1_2424	0.490662	0.550984	0.260614	0.432079
lcl|NC_003423.3_cds_NP_595108.1_2425	0.425624	0.45991	0.244278	0.379937
lcl|NC_003423.3_cds_NP_595109.1_2426	0.459753	0.528204	0.256201	0.409317
lcl|NC_003423.3_cds_NP_595110.1_2427	0.47721	0.508595	0.271795	0.425862
lcl|NC_003423.3_cds_NP_595111.1_2428	0.432518	0.48329	0.250334	0.380707
lcl|NC_003423.3_cds_NP_595112.1_2429	0.456635	0.503037	0.265449	0.406861
lcl|NC_003423.3_cds_NP_595113.1_2430	0.453692	0.493329	0.237263	0.396462
lcl|NC_003423.3_cds_NP_595115.1_2432	0.405942	0.40692	0.234635	0.361829
lcl|NC_003423.3_cds_NP_595116.1_2433	0.437411	0.490712	0.249703	0.389411
lcl|NC_003423.3_cds_NP_595117.1_2434	0.481279	0.52523	0.282443	0.426852
lcl|NC_003423.3_cds_NP_595118.1_2435	0.458441	0.511199	0.269434	0.411354
lcl|NC_003423.3_cds_NP_595119.1_2436	0.46147	0.523216	0.262219	0.411953
lcl|NC_003423.3_cds_NP_595120.1_2437	0.51261	0.563244	0.300253	0.456176
lcl|NC_003423.3_cds_NP_595121.1_2438	0.458083	0.491439	0.26405	0.411837
lcl|NC_003423.3_cds_NP_595122.1_2439	0.533052	0.625278	0.336383	0.476276
lcl|NC_003423.3_cds_NP_595123.2_2440	0.418713	0.486909	0.202899	0.362218
lcl|NC_003423.3_cds_NP_595124.1_2441	0.432818	0.488712	0.233209	0.381299
lcl|NC_003423.3_cds_NP_595125.1_2442	0.502965	0.596533	0.286458	0.443783
lcl|NC_003423.3_cds_NP_595126.1_2443	0.431777	0.487168	0.227577	0.378079
lcl|NC_003423.3_cds_NP_595127.1_2444	0.408433	0.460581	0.221522	0.359945
lcl|NC_003423.3_cds_NP_595128.1_2445	0.4281	0.475526	0.224089	0.374695
lcl|NC_003423.3_cds_NP_595129.1_2446	0.473501	0.535283	0.270162	0.417247
lcl|NC_003423.3_cds_NP_595130.1_2447	0.455252	0.513503	0.257048	0.400488
lcl|NC_003423.3_cds_NP_595132.2_2449	0.431826	0.462398	0.229065	0.377264
lcl|NC_003423.3_cds_NP_595133.1_2450	0.500376	0.556485	0.28316	0.439159
lcl|NC_003423.3_cds_NP_595134.1_2451	0.504639	0.591754	0.262931	0.439148
lcl|NC_003423.3_cds_NP_595135.1_2452	0.456688	0.501587	0.258153	0.402417
lcl|NC_003423.3_cds_NP_595136.1_2453	0.491763	0.529146	0.265214	0.433767
lcl|NC_003423.3_cds_NP_595137.1_2454	0.425861	0.456602	0.268804	0.382922
lcl|NC_003423.3_cds_NP_595139.1_2456	0.436496	0.458537	0.266378	0.391516
lcl|NC_003423.3_cds_NP_595140.1_2457	0.472377	0.541786	0.241899	0.414999
lcl|NC_003423.3_cds_NP_595141.1_2458	0.523563	0.606281	0.266707	0.45788
lcl|NC_003423.3_cds_NP_595142.1_2459	0.412289	0.504943	0.234578	0.359675
lcl|NC_003423.3_cds_NP_595143.1_2460	0.405547	0.42528	0.251829	0.36788
lcl|NC_003423.3_cds_NP_595144.1_2461	0.387806	0.443372	0.199355	0.338989
lcl|NC_003423.3_cds_NP_595145.1_2462	0.462312	0.548518	0.250244	0.403665
lcl|NC_003423.3_cds_NP_595146.1_2463	0.496206	0.55216	0.247743	0.432855
lcl|NC_003423.3_cds_NP_595147.1_2464	0.426549	0.493897	0.255403	0.382332
lcl|NC_003423.3_cds_NP_595148.1_2465	0.471286	0.560297	0.27413	0.417118
lcl|NC_003423.3_cds_NP_595149.1_2466	0.423868	0.51666	0.228397	0.372531
lcl|NC_003423.3_cds_NP_595150.2_2467	0.432576	0.466447	0.251521	0.389941
lcl|NC_003423.3_cds_NP_595151.1_2468	0.473459	0.510743	0.251592	0.418928
lcl|NC_003423.3_cds_NP_595152.1_2469	0.512284	0.589614	0.290853	0.449767
lcl|NC_003423.3_cds_NP_595153.2_2470	0.456393	0.534816	0.226616	0.397403
lcl|NC_003423.3_cds_NP_595154.3_2471	0.494039	0.595645	0.271731	0.432849
lcl|NC_003423.3_cds_NP_595155.1_2472	0.481068	0.516201	0.29912	0.432543
lcl|NC_003423.3_cds_NP_595156.1_2473	0.410597	0.427127	0.280561	0.372956
lcl|NC_003423.3_cds_NP_595157.1_2474	0.415503	0.433694	0.213794	0.365805
lcl|NC_003423.3_cds_NP_595158.1_2475	0.411766	0.465919	0.226131	0.365
lcl|NC_003423.3_cds_NP_595159.1_2476	0.451662	0.492326	0.22032	0.393882
lcl|NC_003423.3_cds_NP_595160.1_2477	0.43542	0.488743	0.239807	0.388558
lcl|NC_003423.3_cds_NP_595161.1_2478	0.43651	0.46263	0.273797	0.395561
lcl|NC_003423.3_cds_NP_595162.1_2479	0.411707	0.458917	0.227713	0.367665
lcl|NC_003423.3_cds_NP_595163.1_2480	0.476289	0.550098	0.27601	0.42085
lcl|NC_003423.3_cds_NP_595164.2_2481	0.470033	0.602296	0.231788	0.408873
lcl|NC_003423.3_cds_NP_595165.1_2482	0.508655	0.563707	0.302454	0.445942
lcl|NC_003423.3_cds_NP_595166.1_2483	0.466765	0.549243	0.251494	0.41137
lcl|NC_003423.3_cds_NP_595167.1_2484	0.657057	0.751734	0.415691	0.589445
lcl|NC_003423.3_cds_NP_595168.1_2485	0.424595	0.481337	0.239993	0.374967
lcl|NC_003423.3_cds_NP_595170.2_2486	0.451876	0.514771	0.251062	0.399634
lcl|NC_003423.3_cds_NP_595172.2_2488	0.423494	0.494134	0.222659	0.369708
lcl|NC_003423.3_cds_NP_595173.1_2489	0.436118	0.504838	0.240831	0.383998
lcl|NC_003423.3_cds_NP_595174.1_2490	0.421636	0.475832	0.25338	0.37931
lcl|NC_003423.3_cds_NP_595175.1_2491	0.467083	0.55117	0.240219	0.407438
lcl|NC_003423.3_cds_NP_595176.1_2492	0.462494	0.535706	0.244843	0.405095
lcl|NC_003423.3_cds_NP_595177.1_2493	0.470214	0.548384	0.28387	0.423218
lcl|NC_003423.3_cds_NP_595178.1_2494	0.412359	0.451056	0.236349	0.366134
lcl|NC_003423.3_cds_NP_595180.2_2496	0.579704	0.711019	0.346315	0.512899
lcl|NC_003423.3_cds_NP_595181.1_2497	0.484521	0.573155	0.234573	0.42215
lcl|NC_003423.3_cds_NP_595182.1_2498	0.454425	0.543808	0.244119	0.395745
lcl|NC_003423.3_cds_NP_595183.1_2499	0.587275	0.739619	0.351805	0.519331
lcl|NC_003423.3_cds_NP_595184.2_2500	0.441421	0.507247	0.24401	0.388407
lcl|NC_003423.3_cds_NP_595185.1_2501	0.466025	0.518169	0.282509	0.41524
lcl|NC_003423.3_cds_NP_595186.1_2502	0.433604	0.480914	0.22835	0.382908
lcl|NC_003423.3_cds_NP_595188.2_2503	0.426951	0.438194	0.258642	0.386711
lcl|NC_003423.3_cds_NP_595189.1_2504	0.589114	0.699951	0.305318	0.514771
lcl|NC_003423.3_cds_NP_595190.1_2505	0.427813	0.477599	0.256773	0.382598
lcl|NC_003423.3_cds_NP_595191.1_2506	0.433758	0.47244	0.220364	0.38152
lcl|NC_003423.3_cds_NP_595192.1_2507	0.451659	0.530022	0.251931	0.403104
lcl|NC_003423.3_cds_NP_595193.1_2508	0.444541	0.468249	0.239971	0.391682
lcl|NC_003423.3_cds_NP_595194.1_2509	0.51395	0.588888	0.295025	0.452349
lcl|NC_003423.3_cds_NP_595195.1_2510	0.427508	0.489348	0.242267	0.380398
lcl|NC_003423.3_cds_NP_595196.1_2511	0.426136	0.472995	0.268443	0.381636
lcl|NC_003423.3_cds_NP_595197.1_2512	0.459516	0.495116	0.26574	0.408613
lcl|NC_003423.3_cds_NP_595200.1_2514	0.433845	0.495674	0.221825	0.378658
lcl|NC_003423.3_cds_NP_595201.1_2515	0.404348	0.473101	0.229976	0.360739
lcl|NC_003423.3_cds_NP_595202.1_2516	0.432525	0.479857	0.248444	0.386488
lcl|NC_003423.3_cds_NP_595203.2_2517	0.531468	0.586896	0.314489	0.472137
lcl|NC_003423.3_cds_NP_595205.1_2519	0.458544	0.535758	0.24359	0.401924
lcl|NC_003423.3_cds_NP_595206.1_2520	0.558536	0.693595	0.339996	0.494894
lcl|NC_003423.3_cds_NP_595207.1_2521	0.42636	0.478683	0.246976	0.376674
lcl|NC_003423.3_cds_NP_595208.1_2523	0.396994	0.421245	0.274604	0.370093
lcl|NC_003423.3_cds_NP_595209.1_2524	0.457745	0.50833	0.256356	0.404322
lcl|NC_003423.3_cds_NP_595210.1_2525	0.408703	0.455509	0.221933	0.360261
lcl|NC_003423.3_cds_NP_595211.1_2526	0.460507	0.512896	0.250528	0.407081
lcl|NC_003423.3_cds_NP_595212.1_2527	0.419746	0.442629	0.275813	0.382187
lcl|NC_003423.3_cds_NP_595213.1_2528	0.59897	0.743764	0.41723	0.536935
lcl|NC_003423.3_cds_NP_595214.1_2529	0.542985	0.663385	0.3376	0.486544
lcl|NC_003423.3_cds_NP_595215.1_2530	0.394243	0.456093	0.209676	0.347448
lcl|NC_003423.3_cds_NP_595217.1_2533	0.592128	0.709739	0.315989	0.516542
lcl|NC_003423.3_cds_NP_595218.1_2534	0.430402	0.471914	0.242551	0.385257
lcl|NC_003423.3_cds_NP_595221.1_2536	0.58908	0.677584	0.325222	0.518307
lcl|NC_003423.3_cds_NP_595222.1_2537	0.41834	0.476641	0.243309	0.377918
lcl|NC_003423.3_cds_NP_595223.1_2538	0.502521	0.688162	0.206576	0.425795
lcl|NC_003423.3_cds_NP_595224.1_2539	0.419137	0.451514	0.247246	0.375998
lcl|NC_003423.3_cds_NP_595225.2_2540	0.437948	0.460918	0.258753	0.392972
lcl|NC_003423.3_cds_NP_595226.1_2541	0.496519	0.599053	0.287765	0.439877
lcl|NC_003423.3_cds_NP_595227.1_2542	0.420852	0.472248	0.223575	0.364722
lcl|NC_003423.3_cds_NP_595228.1_2543	0.445862	0.487887	0.273056	0.402816
lcl|NC_003423.3_cds_NP_595229.1_2544	0.427396	0.475511	0.238423	0.380588
lcl|NC_003423.3_cds_NP_595230.2_2545	0.476482	0.496179	0.293768	0.424766
lcl|NC_003423.3_cds_NP_595231.3_2546	0.471149	0.542289	0.2748	0.417876
lcl|NC_003423.3_cds_NP_595232.1_2547	0.450264	0.528007	0.2462	0.395643
lcl|NC_003423.3_cds_NP_595233.1_2548	0.437122	0.477621	0.248183	0.388304
lcl|NC_003423.3_cds_NP_595234.1_2549	0.459984	0.471666	0.270308	0.41085
lcl|NC_003423.3_cds_NP_595235.1_2550	0.408173	0.474245	0.224392	0.357857
lcl|NC_003423.3_cds_NP_595237.1_2552	0.429132	0.464858	0.243747	0.38231
lcl|NC_003423.3_cds_NP_595238.1_2553	0.467437	0.544571	0.267589	0.412718
lcl|NC_003423.3_cds_NP_595239.1_2554	0.435935	0.471796	0.236726	0.383634
lcl|NC_003423.3_cds_NP_595240.2_2555	0.433985	0.482123	0.240093	0.383849
lcl|NC_003423.3_cds_NP_595241.1_2556	0.433147	0.505925	0.218908	0.378618
lcl|NC_003423.3_cds_NP_595242.1_2557	0.439304	0.514399	0.227875	0.384726
lcl|NC_003423.3_cds_NP_595244.1_2559	0.629257	0.760952	0.325046	0.547409
lcl|NC_003423.3_cds_NP_595245.1_2561	0.605787	0.726797	0.432606	0.551322
lcl|NC_003423.3_cds_NP_595246.1_2563	0.466164	0.509518	0.281306	0.417842
lcl|NC_003423.3_cds_NP_595247.1_2564	0.486953	0.552961	0.276682	0.430462
lcl|NC_003423.3_cds_NP_595248.1_2565	0.434956	0.500071	0.230089	0.379968
lcl|NC_003423.3_cds_NP_595249.1_2566	0.360073	0.352754	0.197787	0.318488
lcl|NC_003423.3_cds_NP_595250.1_2567	0.440241	0.483683	0.259824	0.393165
lcl|NC_003423.3_cds_NP_595251.1_2568	0.44075	0.507943	0.250312	0.388797
lcl|NC_003423.3_cds_NP_595252.1_2569	0.451133	0.50376	0.21124	0.385896
lcl|NC_003423.3_cds_NP_595253.1_2570	0.593939	0.696618	0.407952	0.538424
lcl|NC_003423.3_cds_NP_595254.1_2571	0.438351	0.495819	0.214611	0.38423
lcl|NC_003423.3_cds_NP_595255.1_2572	0.682412	0.860426	0.405683	0.606337
lcl|NC_003423.3_cds_NP_595256.1_2573	0.531433	0.599332	0.311509	0.470556
lcl|NC_003423.3_cds_NP_595257.1_2574	0.574296	0.674196	0.296783	0.495535
lcl|NC_003423.3_cds_NP_595259.1_2576	0.438093	0.497094	0.245103	0.385774
lcl|NC_003423.3_cds_NP_595260.1_2577	0.455897	0.517327	0.262804	0.404347
lcl|NC_003423.3_cds_NP_595261.1_2578	0.483099	0.532274	0.305218	0.438964
lcl|NC_003423.3_cds_NP_595262.1_2579	0.435464	0.510353	0.290596	0.392338
lcl|NC_003423.3_cds_NP_595263.1_2580	0.417388	0.43616	0.22652	0.372798
lcl|NC_003423.3_cds_NP_595264.1_2581	0.432893	0.52177	0.248218	0.384291
lcl|NC_003423.3_cds_NP_595265.1_2582	0.425447	0.475955	0.2412	0.377652
lcl|NC_003423.3_cds_NP_595266.2_2583	0.43735	0.485763	0.238774	0.387413
lcl|NC_003423.3_cds_NP_595267.1_2584	0.456588	0.505931	0.226055	0.398453
lcl|NC_003423.3_cds_NP_595268.1_2585	0.451121	0.471203	0.288583	0.410807
lcl|NC_003423.3_cds_NP_595269.1_2586	0.471875	0.482903	0.354863	0.434747
lcl|NC_003423.3_cds_NP_595270.1_2587	0.434305	0.439566	0.241717	0.387931
lcl|NC_003423.3_cds_NP_595271.1_2588	0.399405	0.441763	0.210921	0.352976
lcl|NC_003423.3_cds_NP_595272.1_2589	0.476204	0.505697	0.285904	0.427443
lcl|NC_003423.3_cds_NP_595273.2_2590	0.456795	0.519502	0.274846	0.405562
lcl|NC_003423.3_cds_NP_595274.1_2591	0.442717	0.476586	0.257857	0.39629
lcl|NC_003423.3_cds_NP_595275.1_2592	0.450112	0.484785	0.271104	0.406674
lcl|NC_003423.3_cds_NP_595276.1_2593	0.425951	0.455645	0.239948	0.379437
lcl|NC_003423.3_cds_NP_595277.1_2594	0.416482	0.410316	0.232107	0.363256
lcl|NC_003423.3_cds_NP_595278.1_2595	0.666694	0.779635	0.475318	0.597481
lcl|NC_003423.3_cds_NP_595279.1_2596	0.47243	0.553673	0.260718	0.415682
lcl|NC_003423.3_cds_NP_595280.2_2597	0.440754	0.513581	0.23521	0.387588
lcl|NC_003423.3_cds_NP_595281.1_2598	0.446188	0.518003	0.250499	0.394054
lcl|NC_003423.3_cds_NP_595282.2_2599	0.476066	0.552584	0.252476	0.417494
lcl|NC_003423.3_cds_NP_595283.1_2600	0.460786	0.534702	0.275197	0.40941
lcl|NC_003423.3_cds_NP_595284.1_2601	0.485434	0.530392	0.267835	0.43407
lcl|NC_003423.3_cds_NP_595285.1_2602	0.492738	0.49863	0.325139	0.438658
lcl|NC_003423.3_cds_NP_595286.1_2603	0.474361	0.51651	0.290043	0.427426
lcl|NC_003423.3_cds_NP_595287.1_2604	0.466231	0.543361	0.256732	0.40878
lcl|NC_003423.3_cds_NP_595288.1_2605	0.435672	0.48531	0.237363	0.385601
lcl|NC_003423.3_cds_NP_595289.1_2606	0.47159	0.550205	0.242664	0.413767
lcl|NC_003423.3_cds_NP_595290.1_2607	0.472626	0.527328	0.261295	0.414201
lcl|NC_003423.3_cds_NP_595292.1_2609	0.447402	0.483327	0.241315	0.394136
lcl|NC_003423.3_cds_NP_595293.1_2610	0.435541	0.527212	0.274109	0.395276
lcl|NC_003423.3_cds_NP_595294.1_2611	0.435961	0.459707	0.259557	0.3905
lcl|NC_003423.3_cds_NP_595295.1_2612	0.450749	0.561664	0.202202	0.389201
lcl|NC_003423.3_cds_NP_595296.1_2613	0.425346	0.452916	0.267007	0.379458
lcl|NC_003423.3_cds_NP_595297.1_2614	0.471351	0.548351	0.25682	0.414
lcl|NC_003423.3_cds_NP_595298.1_2615	0.407543	0.477569	0.207906	0.35636
lcl|NC_003423.3_cds_NP_595299.2_2616	0.432034	0.487081	0.23266	0.380447
lcl|NC_003423.3_cds_NP_595300.1_2617	0.673225	0.789262	0.484748	0.61692
lcl|NC_003423.3_cds_NP_595301.1_2618	0.460894	0.537992	0.259632	0.408919
lcl|NC_003423.3_cds_NP_595302.1_2619	0.383282	0.418568	0.252392	0.350729
lcl|NC_003423.3_cds_NP_595303.1_2620	0.438915	0.517115	0.29807	0.394621
lcl|NC_003423.3_cds_NP_595304.1_2621	0.445139	0.520211	0.244355	0.393711
lcl|NC_003423.3_cds_NP_595305.1_2622	0.433271	0.520223	0.216991	0.375291
lcl|NC_003423.3_cds_NP_595306.1_2623	0.474789	0.557821	0.27568	0.418837
lcl|NC_003423.3_cds_NP_595307.1_2624	0.412358	0.440647	0.212704	0.364231
lcl|NC_003423.3_cds_NP_595308.1_2625	0.445112	0.468325	0.245147	0.396808
lcl|NC_003423.3_cds_NP_595309.1_2626	0.439842	0.498604	0.237195	0.390773
lcl|NC_003423.3_cds_NP_595310.1_2627	0.432754	0.499008	0.232667	0.37982
lcl|NC_003423.3_cds_NP_595311.1_2628	0.434223	0.487293	0.220928	0.378721
lcl|NC_003423.3_cds_NP_595312.1_2629	0.390527	0.385157	0.20589	0.350855
lcl|NC_003423.3_cds_NP_595313.1_2630	0.445471	0.495658	0.249238	0.39667
lcl|NC_003423.3_cds_NP_595314.1_2631	0.440158	0.479213	0.257235	0.393147
lcl|NC_003423.3_cds_NP_595315.1_2632	0.41874	0.457454	0.208314	0.364469
lcl|NC_003423.3_cds_NP_595316.1_2634	0.440954	0.505652	0.266283	0.39631
lcl|NC_003423.3_cds_NP_595317.1_2635	0.426096	0.436403	0.244189	0.38008
lcl|NC_003423.3_cds_NP_595318.2_2636	0.437535	0.485973	0.224873	0.383956
lcl|NC_003423.3_cds_NP_595319.2_2637	0.424511	0.495441	0.23257	0.373214
lcl|NC_003423.3_cds_NP_595320.1_2638	0.473589	0.573436	0.267174	0.417255
lcl|NC_003423.3_cds_NP_595321.1_2639	0.429931	0.498998	0.225335	0.377522
lcl|NC_003423.3_cds_NP_595322.1_2640	0.415673	0.443762	0.217802	0.367393
lcl|NC_003423.3_cds_NP_595323.1_2641	0.625791	0.779242	0.319592	0.543062
lcl|NC_003423.3_cds_NP_595324.1_2642	0.419579	0.452855	0.233221	0.373546
lcl|NC_003423.3_cds_NP_595325.2_2643	0.439275	0.506483	0.25456	0.392885
lcl|NC_003423.3_cds_NP_595326.2_2644	0.397339	0.453173	0.229995	0.350694
lcl|NC_003423.3_cds_NP_595327.1_2645	0.4551	0.503385	0.246312	0.401427
lcl|NC_003423.3_cds_NP_595328.2_2646	0.444335	0.491992	0.237598	0.390494
lcl|NC_003423.3_cds_NP_595329.1_2647	0.474524	0.54779	0.254716	0.417777
lcl|NC_003423.3_cds_NP_595330.1_2648	0.453837	0.516932	0.241892	0.398873
lcl|NC_003423.3_cds_NP_595331.1_2649	0.479261	0.558365	0.269926	0.424476
lcl|NC_003423.3_cds_NP_595332.1_2651	0.523927	0.600264	0.299344	0.465621
lcl|NC_003423.3_cds_NP_595333.1_2652	0.478144	0.558064	0.239307	0.416487
lcl|NC_003423.3_cds_NP_595334.1_2653	0.42033	0.498564	0.224005	0.368103
lcl|NC_003423.3_cds_NP_595335.1_2654	0.433316	0.48474	0.237246	0.382971
lcl|NC_003423.3_cds_NP_595336.1_2655	0.429066	0.520556	0.224024	0.371681
lcl|NC_003423.3_cds_NP_595337.1_2656	0.434011	0.505241	0.245805	0.388922
lcl|NC_003423.3_cds_NP_595338.1_2657	0.415692	0.471125	0.237315	0.376498
lcl|NC_003423.3_cds_NP_595340.1_2659	0.40913	0.465816	0.234674	0.364007
lcl|NC_003423.3_cds_NP_595341.1_2660	0.445792	0.51106	0.230728	0.392468
lcl|NC_003423.3_cds_NP_595342.1_2661	0.486746	0.568181	0.277864	0.42964
lcl|NC_003423.3_cds_NP_595343.1_2662	0.428209	0.474968	0.229906	0.377118
lcl|NC_003423.3_cds_NP_595344.1_2663	0.451671	0.509867	0.241284	0.391215
lcl|NC_003423.3_cds_NP_595345.1_2664	0.436623	0.4981	0.23974	0.382765
lcl|NC_003423.3_cds_NP_595346.1_2665	0.443922	0.505759	0.218237	0.38753
lcl|NC_003423.3_cds_NP_595347.1_2666	0.476491	0.552799	0.252639	0.421294
lcl|NC_003423.3_cds_NP_595348.1_2667	0.470884	0.520523	0.285449	0.422441
lcl|NC_003423.3_cds_NP_595349.1_2668	0.428993	0.473619	0.270213	0.380595
lcl|NC_003423.3_cds_NP_595350.2_2669	0.597969	0.740211	0.341488	0.521811
lcl|NC_003423.3_cds_NP_595351.1_2671	0.554721	0.665335	0.300793	0.484358
lcl|NC_003423.3_cds_NP_595354.1_2673	0.424774	0.47535	0.242714	0.37869
lcl|NC_003423.3_cds_NP_595355.1_2674	0.439007	0.455779	0.238441	0.387928
lcl|NC_003423.3_cds_NP_595356.1_2675	0.441457	0.514741	0.209243	0.380567
lcl|NC_003423.3_cds_NP_595357.1_2676	0.42376	0.498282	0.232288	0.373068
lcl|NC_003423.3_cds_NP_595358.1_2677	0.420425	0.485757	0.231602	0.370076
lcl|NC_003423.3_cds_NP_595359.2_2678	0.43124	0.485285	0.248518	0.382039
lcl|NC_003423.3_cds_NP_595360.1_2679	0.413431	0.490567	0.213553	0.363624
lcl|NC_003423.3_cds_NP_595361.1_2680	0.436781	0.455064	0.224437	0.380859
lcl|NC_003423.3_cds_NP_595362.1_2681	0.467883	0.534518	0.27969	0.414787
lcl|NC_003423.3_cds_NP_595363.1_2682	0.484374	0.586712	0.260624	0.425232
lcl|NC_003423.3_cds_NP_595365.1_2684	0.443406	0.498193	0.228265	0.386265
lcl|NC_003423.3_cds_NP_595366.1_2685	0.455646	0.519675	0.265145	0.403915
lcl|NC_003423.3_cds_NP_595367.1_2686	0.479777	0.605472	0.257332	0.420444
lcl|NC_003423.3_cds_NP_595368.1_2687	0.51276	0.57132	0.302016	0.459021
lcl|NC_003423.3_cds_NP_595369.1_2688	0.474784	0.526492	0.270469	0.421653
lcl|NC_003423.3_cds_NP_595372.1_2691	0.417038	0.469853	0.237898	0.370183
lcl|NC_003423.3_cds_NP_595373.2_2692	0.40562	0.457646	0.231671	0.359306
lcl|NC_003423.3_cds_NP_595374.1_2693	0.473327	0.501692	0.280069	0.417089
lcl|NC_003423.3_cds_NP_595378.1_2698	0.396922	0.466362	0.21801	0.346929
lcl|NC_003423.3_cds_NP_595379.1_2699	0.411715	0.467916	0.207437	0.357524
lcl|NC_003423.3_cds_NP_595380.1_2700	0.420068	0.451462	0.214302	0.372292
lcl|NC_003423.3_cds_NP_595381.3_2701	0.408463	0.478345	0.22129	0.35842
lcl|NC_003423.3_cds_NP_595382.1_2702	0.501663	0.559299	0.278231	0.440313
lcl|NC_003423.3_cds_NP_595383.2_2703	0.395671	0.430911	0.185252	0.345438
lcl|NC_003423.3_cds_NP_595384.1_2704	0.428207	0.485868	0.230254	0.378141
lcl|NC_003423.3_cds_NP_595385.1_2705	0.416805	0.479911	0.218635	0.36398
lcl|NC_003423.3_cds_NP_595387.1_2707	0.502989	0.588263	0.312245	0.452799
lcl|NC_003423.3_cds_NP_595388.1_2708	0.439892	0.474165	0.308677	0.40425
lcl|NC_003423.3_cds_NP_595389.2_2709	0.473883	0.524241	0.259671	0.418956
lcl|NC_003423.3_cds_NP_595390.2_2710	0.429558	0.481273	0.254899	0.3865
lcl|NC_003423.3_cds_NP_595391.1_2711	0.380354	0.390441	0.215461	0.340162
lcl|NC_003423.3_cds_NP_595392.1_2712	0.444986	0.48955	0.259916	0.398347
lcl|NC_003423.3_cds_NP_595393.1_2713	0.398174	0.42848	0.213501	0.349339
lcl|NC_003423.3_cds_NP_595394.1_2714	0.402361	0.431725	0.228022	0.357043
lcl|NC_003423.3_cds_NP_595395.1_2715	0.407075	0.479633	0.216423	0.358026
lcl|NC_003423.3_cds_NP_595396.1_2716	0.429323	0.470521	0.232345	0.376711
lcl|NC_003423.3_cds_NP_595397.1_2717	0.421028	0.466898	0.24312	0.376031
lcl|NC_003423.3_cds_NP_595398.1_2718	0.43038	0.497006	0.235623	0.37814
lcl|NC_003423.3_cds_NP_595399.2_2719	0.46392	0.543612	0.240991	0.404043
lcl|NC_003423.3_cds_NP_595400.2_2720	0.40981	0.465029	0.233178	0.362824
lcl|NC_003423.3_cds_NP_595401.2_2721	0.448221	0.493263	0.25096	0.398621
lcl|NC_003423.3_cds_NP_595402.1_2722	0.495948	0.56637	0.286605	0.440497
lcl|NC_003423.3_cds_NP_595403.1_2723	0.470721	0.527015	0.271977	0.416935
lcl|NC_003423.3_cds_NP_595404.1_2725	0.442634	0.512263	0.256562	0.38861
lcl|NC_003423.3_cds_NP_595405.1_2726	0.412622	0.477107	0.221662	0.363227
lcl|NC_003423.3_cds_NP_595406.1_2727	0.492224	0.546426	0.281685	0.435362
lcl|NC_003423.3_cds_NP_595407.1_2728	0.405932	0.425584	0.242414	0.365425
lcl|NC_003423.3_cds_NP_595408.1_2729	0.434424	0.515315	0.220859	0.379424
lcl|NC_003423.3_cds_NP_595409.1_2730	0.607739	0.762761	0.400835	0.542384
lcl|NC_003423.3_cds_NP_595410.1_2731	0.393941	0.443095	0.221444	0.350862
lcl|NC_003423.3_cds_NP_595411.1_2732	0.48535	0.570197	0.278043	0.425462
lcl|NC_003423.3_cds_NP_595412.1_2733	0.397583	0.401868	0.235985	0.35952
lcl|NC_003423.3_cds_NP_595413.2_2734	0.417675	0.485589	0.202393	0.364329
lcl|NC_003423.3_cds_NP_595414.1_2735	0.445789	0.507478	0.255492	0.393253
lcl|NC_003423.3_cds_NP_595415.1_2736	0.456641	0.505786	0.258526	0.406874
lcl|NC_003423.3_cds_NP_595416.1_2737	0.459761	0.51994	0.273269	0.407954
lcl|NC_003423.3_cds_NP_595417.1_2738	0.471412	0.568754	0.256116	0.411661
lcl|NC_003423.3_cds_NP_595418.1_2739	0.481239	0.543337	0.257395	0.424752
lcl|NC_003423.3_cds_NP_595419.1_2740	0.464852	0.549976	0.267365	0.409171
lcl|NC_003423.3_cds_NP_595420.2_2741	0.427472	0.475618	0.24465	0.379189
lcl|NC_003423.3_cds_NP_595421.2_2742	0.478088	0.546136	0.258102	0.419779
lcl|NC_003423.3_cds_NP_595422.1_2743	0.417872	0.432093	0.260884	0.373587
lcl|NC_003423.3_cds_NP_595423.1_2744	0.424306	0.47903	0.251671	0.377546
lcl|NC_003423.3_cds_NP_595425.1_2746	0.426058	0.462961	0.266776	0.387639
lcl|NC_003423.3_cds_NP_595426.1_2747	0.371873	0.381077	0.218281	0.333036
lcl|NC_003423.3_cds_NP_595427.1_2748	0.429254	0.496773	0.227637	0.373689
lcl|NC_003423.3_cds_NP_595428.1_2749	0.57545	0.717999	0.282674	0.498049
lcl|NC_003423.3_cds_NP_595429.2_2750	0.397515	0.439157	0.222838	0.352806
lcl|NC_003423.3_cds_NP_595430.1_2751	0.511192	0.6012	0.291498	0.451677
lcl|NC_003423.3_cds_NP_595431.1_2752	0.406721	0.475405	0.213089	0.354744
lcl|NC_003423.3_cds_NP_595432.1_2753	0.454304	0.526074	0.256611	0.402181
lcl|NC_003423.3_cds_NP_595433.1_2754	0.42852	0.479297	0.235273	0.379224
lcl|NC_003423.3_cds_NP_595434.1_2755	0.438142	0.494782	0.223213	0.382084
lcl|NC_003423.3_cds_NP_595435.1_2756	0.527062	0.632534	0.303417	0.463832
lcl|NC_003423.3_cds_NP_595436.2_2757	0.467349	0.550714	0.234411	0.404807
lcl|NC_003423.3_cds_NP_595437.1_2758	0.458368	0.473418	0.234313	0.401643
lcl|NC_003423.3_cds_NP_595438.1_2759	0.667183	0.840648	0.418607	0.595075
lcl|NC_003423.3_cds_NP_595439.1_2760	0.420169	0.450063	0.224696	0.370468
lcl|NC_003423.3_cds_NP_595440.1_2761	0.427423	0.510983	0.241811	0.380063
lcl|NC_003423.3_cds_NP_595441.1_2763	0.442509	0.499435	0.233149	0.387668
lcl|NC_003423.3_cds_NP_595442.1_2764	0.400829	0.419783	0.233939	0.355085
lcl|NC_003423.3_cds_NP_595443.1_2765	0.508874	0.551282	0.325023	0.456785
lcl|NC_003423.3_cds_NP_595445.2_2767	0.443272	0.513351	0.268181	0.394207
lcl|NC_003423.3_cds_NP_595446.1_2768	0.438831	0.53484	0.22398	0.383008
lcl|NC_003423.3_cds_NP_595447.1_2769	0.433532	0.497481	0.235049	0.385541
lcl|NC_003423.3_cds_NP_595448.1_2770	0.44763	0.521626	0.25383	0.393333
lcl|NC_003423.3_cds_NP_595449.2_2771	0.412121	0.446847	0.225967	0.36483
lcl|NC_003423.3_cds_NP_595450.1_2772	0.434206	0.472329	0.253413	0.388192
lcl|NC_003423.3_cds_NP_595451.1_2773	0.426769	0.461817	0.252097	0.381661
lcl|NC_003423.3_cds_NP_595452.2_2774	0.419616	0.444871	0.267092	0.379757
lcl|NC_003423.3_cds_NP_595453.1_2775	0.428534	0.478747	0.231738	0.379521
lcl|NC_003423.3_cds_NP_595454.1_2776	0.415866	0.471107	0.249363	0.371488
lcl|NC_003423.3_cds_NP_595455.1_2777	0.491288	0.566249	0.287221	0.437799
lcl|NC_003423.3_cds_NP_595456.1_2778	0.453745	0.501525	0.256718	0.401835
lcl|NC_003423.3_cds_NP_595457.1_2779	0.459231	0.49362	0.256721	0.407748
lcl|NC_003423.3_cds_NP_595458.1_2780	0.546883	0.703372	0.286241	0.478033
lcl|NC_003423.3_cds_NP_595459.1_2781	0.430522	0.475811	0.251473	0.382111
lcl|NC_003423.3_cds_NP_595460.1_2782	0.506428	0.594457	0.306926	0.449332
lcl|NC_003423.3_cds_NP_595461.1_2783	0.409969	0.471331	0.22395	0.359418
lcl|NC_003423.3_cds_NP_595463.1_2786	0.533132	0.595642	0.274345	0.461118
lcl|NC_003423.3_cds_NP_595464.1_2787	0.366764	0.346833	0.224507	0.336209
lcl|NC_003423.3_cds_NP_595465.1_2788	0.479107	0.559324	0.2884	0.430815
lcl|NC_003423.3_cds_NP_595466.1_2789	0.396533	0.431384	0.223935	0.35395
lcl|NC_003423.3_cds_NP_595467.1_2790	0.439063	0.510318	0.219675	0.379776
lcl|NC_003423.3_cds_NP_595468.1_2791	0.436706	0.491324	0.230422	0.37983
lcl|NC_003423.3_cds_NP_595470.1_2793	0.530406	0.628239	0.31835	0.470853
lcl|NC_003423.3_cds_NP_595471.1_2794	0.455612	0.513192	0.286262	0.410283
lcl|NC_003423.3_cds_NP_595472.2_2795	0.462165	0.508153	0.27178	0.413556
lcl|NC_003423.3_cds_NP_595473.1_2796	0.412655	0.478399	0.212107	0.361028
lcl|NC_003423.3_cds_NP_595474.1_2797	0.393516	0.44965	0.233199	0.346665
lcl|NC_003423.3_cds_NP_595475.2_2798	0.444448	0.486194	0.252831	0.393392
lcl|NC_003423.3_cds_NP_595476.1_2799	0.456591	0.503357	0.241151	0.401063
lcl|NC_003423.3_cds_NP_595477.1_2800	0.476499	0.528496	0.248945	0.417485
lcl|NC_003423.3_cds_NP_595478.1_2801	0.416238	0.49498	0.219726	0.367378
lcl|NC_003423.3_cds_NP_595479.1_2802	0.460763	0.523563	0.241242	0.403584
lcl|NC_003423.3_cds_NP_595480.1_2803	0.506184	0.579198	0.285309	0.446876
lcl|NC_003423.3_cds_NP_595481.1_2804	0.502612	0.565517	0.26526	0.440618
lcl|NC_003423.3_cds_NP_595482.1_2805	0.473631	0.492727	0.263597	0.423304
lcl|NC_003423.3_cds_NP_595483.1_2806	0.466418	0.541579	0.287254	0.416238
lcl|NC_003423.3_cds_NP_595484.1_2807	0.435772	0.446938	0.237592	0.385798
lcl|NC_003423.3_cds_NP_595485.1_2808	0.440566	0.494706	0.222271	0.386456
lcl|NC_003423.3_cds_NP_595486.1_2809	0.39957	0.435674	0.213467	0.35315
lcl|NC_003423.3_cds_NP_595487.1_2810	0.445304	0.515402	0.258963	0.39475
lcl|NC_003423.3_cds_NP_595488.1_2811	0.416674	0.465392	0.215116	0.367127
lcl|NC_003423.3_cds_NP_595489.1_2812	0.46737	0.49775	0.258665	0.421255
lcl|NC_003423.3_cds_NP_595491.1_2814	0.437421	0.440029	0.228169	0.387123
lcl|NC_003423.3_cds_NP_595492.2_2815	0.407982	0.41835	0.273475	0.369438
lcl|NC_003423.3_cds_NP_595493.1_2816	0.418524	0.452011	0.290831	0.383153
lcl|NC_003423.3_cds_NP_595494.1_2817	0.415122	0.427384	0.238951	0.373677
lcl|NC_003423.3_cds_NP_595495.1_2818	0.523808	0.621682	0.306415	0.46186
lcl|NC_003423.3_cds_NP_595496.1_2819	0.442517	0.516921	0.247092	0.392207
lcl|NC_003423.3_cds_NP_595497.1_2820	0.422374	0.482449	0.266382	0.378661
lcl|NC_003423.3_cds_NP_595500.1_2822	0.463281	0.526464	0.260655	0.405348
lcl|NC_003423.3_cds_NP_595501.1_2823	0.441812	0.514881	0.253011	0.39358
lcl|NC_003423.3_cds_NP_595502.1_2824	0.435108	0.48441	0.233166	0.384251
lcl|NC_003423.3_cds_NP_595503.1_2825	0.431126	0.462267	0.250191	0.387452
lcl|NC_003423.3_cds_NP_595504.3_2826	0.425686	0.461123	0.250603	0.381821
lcl|NC_003423.3_cds_NP_595505.1_2827	0.437719	0.522893	0.253093	0.389601
lcl|NC_003423.3_cds_NP_595506.1_2828	0.464987	0.513254	0.243286	0.408546
lcl|NC_003423.3_cds_NP_595507.1_2829	0.472981	0.511012	0.284162	0.425873
lcl|NC_003423.3_cds_NP_595508.1_2830	0.399729	0.458654	0.235755	0.352882
lcl|NC_003423.3_cds_NP_595509.1_2831	0.414871	0.450069	0.240239	0.368982
lcl|NC_003423.3_cds_NP_595510.1_2832	0.434013	0.474527	0.260803	0.385178
lcl|NC_003423.3_cds_NP_595513.1_2834	0.606873	0.801451	0.371244	0.536859
lcl|NC_003423.3_cds_NP_595514.1_2835	0.409071	0.45127	0.224471	0.36222
lcl|NC_003423.3_cds_NP_595515.1_2836	0.636889	0.69542	0.485879	0.588273
lcl|NC_003423.3_cds_NP_595516.1_2837	0.436096	0.496164	0.266708	0.394118
lcl|NC_003423.3_cds_NP_595517.1_2838	0.449079	0.502293	0.25336	0.394714
lcl|NC_003423.3_cds_NP_595518.1_2839	0.481697	0.541163	0.256572	0.418164
lcl|NC_003423.3_cds_NP_595519.1_2840	0.428294	0.470938	0.237299	0.377731
lcl|NC_003423.3_cds_NP_595520.1_2841	0.444665	0.468996	0.258796	0.40289
lcl|NC_003423.3_cds_NP_595521.1_2842	0.434337	0.491274	0.26343	0.387677
lcl|NC_003423.3_cds_NP_595522.1_2843	0.399834	0.422122	0.230091	0.354774
lcl|NC_003423.3_cds_NP_595523.1_2844	0.398453	0.435568	0.224912	0.351189
lcl|NC_003423.3_cds_NP_595524.1_2845	0.469203	0.529285	0.267146	0.413907
lcl|NC_003423.3_cds_NP_595525.1_2846	0.502379	0.580997	0.289969	0.445582
lcl|NC_003423.3_cds_NP_595526.2_2849	0.415431	0.433187	0.235574	0.37397
lcl|NC_003423.3_cds_NP_595527.1_2850	0.450381	0.507443	0.242263	0.399732
lcl|NC_003423.3_cds_NP_595528.1_2851	0.419961	0.434966	0.225126	0.377212
lcl|NC_003423.3_cds_NP_595529.1_2852	0.430218	0.476834	0.239162	0.381327
lcl|NC_003423.3_cds_NP_595530.1_2853	0.456498	0.527572	0.261454	0.404156
lcl|NC_003423.3_cds_NP_595531.1_2854	0.413014	0.4478	0.228791	0.364028
lcl|NC_003423.3_cds_NP_595532.1_2855	0.419291	0.464255	0.239224	0.370032
lcl|NC_003423.3_cds_NP_595534.3_2857	0.402154	0.426634	0.228447	0.360597
lcl|NC_003423.3_cds_NP_595535.2_2858	0.323164	0.303149	0.173234	0.286695
lcl|NC_003423.3_cds_NP_595536.1_2860	0.423519	0.494512	0.234455	0.373886
lcl|NC_003423.3_cds_NP_595537.2_2861	0.402883	0.469134	0.202955	0.351109
lcl|NC_003423.3_cds_NP_595538.1_2862	0.421782	0.497444	0.219571	0.369248
lcl|NC_003423.3_cds_NP_595539.1_2863	0.407976	0.450738	0.207158	0.3587
lcl|NC_003423.3_cds_NP_595541.1_2865	0.426255	0.451871	0.239022	0.3785
lcl|NC_003423.3_cds_NP_595542.1_2866	0.45763	0.507919	0.28193	0.413001
lcl|NC_003423.3_cds_NP_595543.1_2867	0.453033	0.519163	0.227876	0.397414
lcl|NC_003423.3_cds_NP_595544.1_2868	0.439492	0.435569	0.264282	0.381654
lcl|NC_003423.3_cds_NP_595545.1_2869	0.466353	0.519781	0.256722	0.414658
lcl|NC_003423.3_cds_NP_595546.2_2870	0.497717	0.595254	0.282157	0.44064
lcl|NC_003423.3_cds_NP_595564.1_2871	0.464007	0.524882	0.256901	0.410485
lcl|NC_003423.3_cds_NP_595566.1_2873	0.677675	0.810661	0.420524	0.600943
lcl|NC_003423.3_cds_NP_595567.1_2874	0.654233	0.802891	0.42392	0.583838
lcl|NC_003423.3_cds_NP_595568.1_2875	0.420039	0.462559	0.238649	0.370849
lcl|NC_003423.3_cds_NP_595569.1_2876	0.534461	0.657829	0.309254	0.47174
lcl|NC_003423.3_cds_NP_595570.1_2877	0.413344	0.494259	0.220622	0.361179
lcl|NC_003423.3_cds_NP_595571.1_2878	0.451129	0.48068	0.236428	0.396811
lcl|NC_003423.3_cds_NP_595572.1_2879	0.475841	0.541894	0.257437	0.417283
lcl|NC_003423.3_cds_NP_595573.1_2881	0.446391	0.480121	0.253187	0.401574
lcl|NC_003423.3_cds_NP_595574.1_2882	0.41119	0.434669	0.22975	0.364945
lcl|NC_003423.3_cds_NP_595575.1_2883	0.421964	0.500908	0.226236	0.371046
lcl|NC_003423.3_cds_NP_595576.1_2884	0.441224	0.476611	0.259761	0.395262
lcl|NC_003423.3_cds_NP_595578.1_2886	0.392526	0.424602	0.227832	0.349866
lcl|NC_003423.3_cds_NP_595579.2_2887	0.46328	0.531562	0.24557	0.410357
lcl|NC_003423.3_cds_NP_595580.1_2888	0.633214	0.826469	0.350252	0.558178
lcl|NC_003423.3_cds_NP_595581.1_2889	0.391745	0.423753	0.217501	0.348995
lcl|NC_003423.3_cds_NP_595582.1_2890	0.472092	0.531952	0.277488	0.420012
lcl|NC_003423.3_cds_NP_595583.2_2891	0.466798	0.539549	0.269405	0.415758
lcl|NC_003423.3_cds_NP_595584.1_2892	0.441323	0.506684	0.219942	0.374848
lcl|NC_003423.3_cds_NP_595585.2_2893	0.439152	0.510752	0.22498	0.384328
lcl|NC_003423.3_cds_NP_595586.1_2894	0.497233	0.605986	0.26676	0.437493
lcl|NC_003423.3_cds_NP_595587.1_2895	0.435831	0.490004	0.234597	0.384167
lcl|NC_003423.3_cds_NP_595588.1_2896	0.411239	0.464681	0.22287	0.365349
lcl|NC_003423.3_cds_NP_595589.1_2897	0.519137	0.594821	0.267546	0.450391
lcl|NC_003423.3_cds_NP_595590.1_2898	0.399692	0.447766	0.208711	0.349644
lcl|NC_003423.3_cds_NP_595591.1_2899	0.418695	0.472239	0.234883	0.36689
lcl|NC_003423.3_cds_NP_595592.1_2900	0.41877	0.480021	0.257363	0.373837
lcl|NC_003423.3_cds_NP_595594.1_2902	0.419673	0.481398	0.23817	0.373012
lcl|NC_003423.3_cds_NP_595595.1_2903	0.415144	0.468386	0.228565	0.367795
lcl|NC_003423.3_cds_NP_595596.1_2904	0.440424	0.475283	0.262782	0.39567
lcl|NC_003423.3_cds_NP_595599.1_2906	0.461603	0.516374	0.269704	0.411747
lcl|NC_003423.3_cds_NP_595600.1_2907	0.461119	0.517049	0.239749	0.407868
lcl|NC_003423.3_cds_NP_595602.1_2909	0.428377	0.480935	0.236722	0.377457
lcl|NC_003423.3_cds_NP_595603.1_2910	0.44587	0.502589	0.228149	0.392109
lcl|NC_003423.3_cds_NP_595604.1_2911	0.448921	0.489025	0.238827	0.392447
lcl|NC_003423.3_cds_NP_595605.1_2912	0.636459	0.779203	0.386415	0.56839
lcl|NC_003423.3_cds_NP_595607.1_2914	0.403082	0.450399	0.233854	0.358516
lcl|NC_003423.3_cds_NP_595608.1_2915	0.477649	0.529321	0.285145	0.429541
lcl|NC_003423.3_cds_NP_595609.1_2917	0.541104	0.656417	0.281277	0.47222
lcl|NC_003423.3_cds_NP_595611.1_2919	0.487624	0.507014	0.306009	0.437742
lcl|NC_003423.3_cds_NP_595612.1_2920	0.398694	0.469118	0.241881	0.356797
lcl|NC_003423.3_cds_NP_595613.1_2921	0.439382	0.460921	0.244963	0.388316
lcl|NC_003423.3_cds_NP_595614.2_2922	0.420061	0.498636	0.212481	0.36666
lcl|NC_003423.3_cds_NP_595615.1_2923	0.411925	0.506886	0.211497	0.359627
lcl|NC_003423.3_cds_NP_595616.1_2924	0.436028	0.481663	0.255162	0.388886
lcl|NC_003423.3_cds_NP_595617.1_2925	0.417271	0.468651	0.207893	0.36193
lcl|NC_003423.3_cds_NP_595618.1_2926	0.614139	0.806831	0.364861	0.544186
lcl|NC_003423.3_cds_NP_595619.1_2927	0.431486	0.486833	0.231046	0.378984
lcl|NC_003423.3_cds_NP_595621.3_2928	0.434814	0.478841	0.246617	0.383797
lcl|NC_003423.3_cds_NP_595622.1_2929	0.48697	0.578193	0.267362	0.428657
lcl|NC_003423.3_cds_NP_595623.2_2930	0.390061	0.444404	0.218159	0.346293
lcl|NC_003423.3_cds_NP_595624.1_2931	0.392683	0.438264	0.229332	0.351189
lcl|NC_003423.3_cds_NP_595625.1_2932	0.419801	0.462906	0.226693	0.37096
lcl|NC_003423.3_cds_NP_595627.1_2934	0.429352	0.451604	0.242967	0.377801
lcl|NC_003423.3_cds_NP_595628.1_2935	0.499192	0.573012	0.243429	0.434006
lcl|NC_003423.3_cds_NP_595630.3_2937	0.493966	0.526313	0.270624	0.434356
lcl|NC_003423.3_cds_NP_595631.1_2938	0.418312	0.462284	0.257352	0.373892
lcl|NC_003423.3_cds_NP_595632.1_2939	0.439196	0.525656	0.255885	0.391531
lcl|NC_003423.3_cds_NP_595633.2_2940	0.435428	0.489365	0.264755	0.387575
lcl|NC_003423.3_cds_NP_595634.1_2941	0.584366	0.672549	0.373748	0.517027
lcl|NC_003423.3_cds_NP_595635.1_2942	0.420291	0.463983	0.231088	0.372386
lcl|NC_003423.3_cds_NP_595636.1_2943	0.476804	0.556116	0.259806	0.426313
lcl|NC_003423.3_cds_NP_595637.1_2944	0.42192	0.457752	0.241095	0.376881
lcl|NC_003423.3_cds_NP_595638.2_2945	0.394459	0.45029	0.223754	0.348401
lcl|NC_003423.3_cds_NP_595639.1_2946	0.434858	0.488917	0.235497	0.382998
lcl|NC_003423.3_cds_NP_595640.1_2947	0.47167	0.510214	0.278987	0.418965
lcl|NC_003423.3_cds_NP_595641.1_2948	0.431506	0.47138	0.22368	0.379917
lcl|NC_003423.3_cds_NP_595642.1_2949	0.431021	0.504432	0.246968	0.383866
lcl|NC_003423.3_cds_NP_595643.2_2950	0.43779	0.507037	0.242421	0.38327
lcl|NC_003423.3_cds_NP_595644.1_2951	0.410265	0.471042	0.175909	0.348775
lcl|NC_003423.3_cds_NP_595645.1_2952	0.552518	0.637789	0.318505	0.490746
lcl|NC_003423.3_cds_NP_595646.1_2953	0.437729	0.478668	0.272731	0.395985
lcl|NC_003423.3_cds_NP_595647.1_2954	0.435361	0.491188	0.254284	0.387
lcl|NC_003423.3_cds_NP_595648.1_2955	0.463689	0.528218	0.257092	0.412108
lcl|NC_003423.3_cds_NP_595649.1_2956	0.435391	0.521811	0.225523	0.380891
lcl|NC_003423.3_cds_NP_595650.1_2957	0.533991	0.580808	0.337542	0.47207
lcl|NC_003423.3_cds_NP_595651.1_2958	0.444438	0.524409	0.250103	0.394395
lcl|NC_003423.3_cds_NP_595653.1_2960	0.508498	0.590143	0.261584	0.445127
lcl|NC_003423.3_cds_NP_595654.1_2961	0.640901	0.671068	0.445313	0.585464
lcl|NC_003423.3_cds_NP_595655.1_2962	0.449562	0.509422	0.251597	0.399624
lcl|NC_003423.3_cds_NP_595656.1_2963	0.465182	0.524476	0.254553	0.410918
lcl|NC_003423.3_cds_NP_595657.1_2964	0.424508	0.470208	0.227628	0.37649
lcl|NC_003423.3_cds_NP_595658.1_2965	0.438735	0.520729	0.248855	0.389501
lcl|NC_003423.3_cds_NP_595659.1_2966	0.450733	0.508412	0.262346	0.403865
lcl|NC_003423.3_cds_NP_595660.1_2967	0.383317	0.450529	0.197179	0.331047
lcl|NC_003423.3_cds_NP_595661.1_2968	0.437663	0.421609	0.260602	0.390199
lcl|NC_003423.3_cds_NP_595662.2_2969	0.562079	0.668705	0.323298	0.499526
lcl|NC_003423.3_cds_NP_595663.1_2970	0.496601	0.539597	0.310884	0.446524
lcl|NC_003423.3_cds_NP_595664.1_2971	0.63972	0.767696	0.338279	0.557314
lcl|NC_003423.3_cds_NP_595665.1_2972	0.41443	0.475526	0.26711	0.375217
lcl|NC_003423.3_cds_NP_595666.1_2973	0.424669	0.492845	0.239008	0.376895
lcl|NC_003423.3_cds_NP_595667.1_2974	0.425431	0.466864	0.244543	0.37516
lcl|NC_003423.3_cds_NP_595668.1_2975	0.423899	0.468855	0.259668	0.379031
lcl|NC_003423.3_cds_NP_595669.1_2976	0.414528	0.459276	0.232948	0.369104
lcl|NC_003423.3_cds_NP_595670.1_2977	0.4765	0.535085	0.255315	0.418816
lcl|NC_003423.3_cds_NP_595671.1_2978	0.434078	0.491173	0.247774	0.389089
lcl|NC_003423.3_cds_NP_595672.1_2979	0.463972	0.479048	0.330804	0.425813
lcl|NC_003423.3_cds_NP_595673.1_2980	0.469772	0.522543	0.261642	0.41514
lcl|NC_003423.3_cds_NP_595674.1_2981	0.403195	0.44072	0.232607	0.356103
lcl|NC_003423.3_cds_NP_595675.1_2982	0.434435	0.50521	0.264835	0.383599
lcl|NC_003423.3_cds_NP_595676.1_2983	0.428294	0.449128	0.278767	0.384532
lcl|NC_003423.3_cds_NP_595677.1_2984	0.619836	0.730283	0.397827	0.552579
lcl|NC_003423.3_cds_NP_595678.1_2986	0.419071	0.478544	0.214887	0.366055
lcl|NC_003423.3_cds_NP_595679.1_2987	0.54672	0.68263	0.262215	0.472032
lcl|NC_003423.3_cds_NP_595680.1_2988	0.496913	0.590891	0.212856	0.418736
lcl|NC_003423.3_cds_NP_595681.1_2989	0.405611	0.460411	0.225301	0.358652
lcl|NC_003423.3_cds_NP_595682.1_2990	0.423138	0.472008	0.219567	0.371187
lcl|NC_003423.3_cds_NP_595683.1_2991	0.526034	0.652013	0.294868	0.452708
lcl|NC_003423.3_cds_NP_595684.1_2993	0.468562	0.490059	0.284483	0.421271
lcl|NC_003423.3_cds_NP_595685.2_2994	0.448154	0.509489	0.239934	0.391495
lcl|NC_003423.3_cds_NP_595686.2_2995	0.436257	0.493724	0.258546	0.39019
lcl|NC_003423.3_cds_NP_595687.1_2996	0.402986	0.441249	0.20796	0.353503
lcl|NC_003423.3_cds_NP_595688.1_2997	0.445183	0.444459	0.246002	0.398096
lcl|NC_003423.3_cds_NP_595689.1_2998	0.447719	0.54785	0.250479	0.39424
lcl|NC_003423.3_cds_NP_595690.1_2999	0.42877	0.479773	0.229478	0.376662
lcl|NC_003423.3_cds_NP_595691.1_3000	0.408682	0.46639	0.212956	0.361113
lcl|NC_003423.3_cds_NP_595692.1_3001	0.651046	0.822818	0.412538	0.584907
lcl|NC_003423.3_cds_NP_595693.1_3002	0.404029	0.458412	0.218574	0.357915
lcl|NC_003423.3_cds_NP_595694.1_3003	0.480125	0.555159	0.295801	0.429048
lcl|NC_003423.3_cds_NP_595695.1_3004	0.425789	0.460504	0.231949	0.378495
lcl|NC_003423.3_cds_NP_595696.1_3005	0.459781	0.506929	0.27452	0.411143
lcl|NC_003423.3_cds_NP_595697.1_3006	0.439314	0.485715	0.230146	0.380276
lcl|NC_003423.3_cds_NP_595698.1_3007	0.423747	0.460481	0.235272	0.373105
lcl|NC_003423.3_cds_NP_595699.1_3008	0.489854	0.523164	0.264388	0.432813
lcl|NC_003423.3_cds_NP_595700.1_3009	0.427355	0.486769	0.261589	0.375281
lcl|NC_003423.3_cds_NP_595701.1_3010	0.435908	0.507137	0.230006	0.383743
lcl|NC_003423.3_cds_NP_595702.1_3011	0.595701	0.725563	0.330574	0.524461
lcl|NC_003423.3_cds_NP_595703.1_3012	0.451265	0.496164	0.256004	0.399088
lcl|NC_003423.3_cds_NP_595704.1_3013	0.414246	0.450151	0.229803	0.366693
lcl|NC_003423.3_cds_NP_595705.1_3015	0.460308	0.516682	0.274808	0.408925
lcl|NC_003423.3_cds_NP_595707.1_3017	0.425186	0.46844	0.213632	0.370705
lcl|NC_003423.3_cds_NP_595708.1_3018	0.428359	0.486689	0.215601	0.371885
lcl|NC_003423.3_cds_NP_595709.1_3019	0.648889	0.78814	0.366703	0.570739
lcl|NC_003423.3_cds_NP_595710.1_3020	0.453996	0.517197	0.260781	0.404123
lcl|NC_003423.3_cds_NP_595711.1_3021	0.635032	0.705004	0.434619	0.573385
lcl|NC_003423.3_cds_NP_595712.1_3022	0.434969	0.496366	0.241639	0.385941
lcl|NC_003423.3_cds_NP_595713.1_3023	0.424186	0.450688	0.239549	0.374695
lcl|NC_003423.3_cds_NP_595714.2_3024	0.420714	0.45308	0.255155	0.380509
lcl|NC_003423.3_cds_NP_595715.1_3025	0.540581	0.565762	0.349261	0.487409
lcl|NC_003423.3_cds_NP_595716.1_3026	0.475875	0.55868	0.280437	0.429496
lcl|NC_003423.3_cds_NP_595717.1_3027	0.452034	0.46971	0.252392	0.40441
lcl|NC_003423.3_cds_NP_595719.1_3029	0.449903	0.525529	0.302671	0.406152
lcl|NC_003423.3_cds_NP_595720.1_3030	0.463332	0.507407	0.241492	0.408358
lcl|NC_003423.3_cds_NP_595721.1_3031	0.510259	0.59831	0.298159	0.457162
lcl|NC_003423.3_cds_NP_595722.1_3032	0.424794	0.495202	0.233351	0.376855
lcl|NC_003423.3_cds_NP_595723.1_3033	0.436753	0.477195	0.293745	0.400248
lcl|NC_003423.3_cds_NP_595724.1_3034	0.425671	0.47284	0.267804	0.381921
lcl|NC_003423.3_cds_NP_595725.2_3035	0.433325	0.501662	0.255434	0.38643
lcl|NC_003423.3_cds_NP_595726.1_3036	0.523862	0.634553	0.292698	0.462247
lcl|NC_003423.3_cds_NP_595727.1_3037	0.521816	0.582891	0.262903	0.458991
lcl|NC_003423.3_cds_NP_595728.1_3038	0.561043	0.619815	0.342646	0.500588
lcl|NC_003423.3_cds_NP_595729.1_3039	0.425631	0.474043	0.231451	0.37381
lcl|NC_003423.3_cds_NP_595730.1_3040	0.422627	0.472378	0.218819	0.366163
lcl|NC_003423.3_cds_NP_595731.1_3041	0.408677	0.466756	0.25268	0.366338
lcl|NC_003423.3_cds_NP_595733.2_3043	0.420015	0.481927	0.220988	0.370627
lcl|NC_003423.3_cds_NP_595734.2_3044	0.40401	0.429656	0.237842	0.363182
lcl|NC_003423.3_cds_NP_595735.1_3045	0.40867	0.463327	0.233368	0.365873
lcl|NC_003423.3_cds_NP_595736.1_3046	0.626777	0.75378	0.412728	0.56643
lcl|NC_003423.3_cds_NP_595737.1_3047	0.700184	0.815245	0.407453	0.615579
lcl|NC_003423.3_cds_NP_595738.1_3048	0.6564	0.771174	0.379967	0.583664
lcl|NC_003423.3_cds_NP_595739.1_3049	0.434415	0.504801	0.260064	0.386417
lcl|NC_003423.3_cds_NP_595741.1_3051	0.425389	0.486029	0.247609	0.377527
lcl|NC_003423.3_cds_NP_595742.2_3052	0.405301	0.451798	0.230705	0.358438
lcl|NC_003423.3_cds_NP_595743.2_3053	0.415622	0.465484	0.234734	0.370516
lcl|NC_003423.3_cds_NP_595744.1_3054	0.431356	0.480339	0.245609	0.386106
lcl|NC_003423.3_cds_NP_595745.1_3056	0.484009	0.558635	0.271201	0.425403
lcl|NC_003423.3_cds_NP_595746.1_3057	0.548697	0.629223	0.310603	0.48339
lcl|NC_003423.3_cds_NP_595747.1_3058	0.462298	0.503935	0.234111	0.409615
lcl|NC_003423.3_cds_NP_595748.2_3059	0.426313	0.436867	0.220699	0.372607
lcl|NC_003423.3_cds_NP_595749.1_3060	0.418655	0.45454	0.23305	0.373138
lcl|NC_003423.3_cds_NP_595750.1_3061	0.51791	0.586541	0.288873	0.460136
lcl|NC_003423.3_cds_NP_595751.1_3062	0.417371	0.425394	0.234763	0.369791
lcl|NC_003423.3_cds_NP_595752.1_3063	0.484837	0.563716	0.263072	0.428018
lcl|NC_003423.3_cds_NP_595753.1_3064	0.448428	0.52004	0.250237	0.39497
lcl|NC_003423.3_cds_NP_595754.1_3065	0.423165	0.454451	0.214462	0.370536
lcl|NC_003423.3_cds_NP_595755.1_3066	0.416924	0.464524	0.253528	0.370645
lcl|NC_003423.3_cds_NP_595756.1_3067	0.430799	0.485681	0.236576	0.380226
lcl|NC_003423.3_cds_NP_595757.1_3068	0.41589	0.484332	0.232258	0.36839
lcl|NC_003423.3_cds_NP_595758.1_3069	0.462727	0.499288	0.273552	0.409731
lcl|NC_003423.3_cds_NP_595759.2_3070	0.437628	0.508586	0.23374	0.384455
lcl|NC_003423.3_cds_NP_595760.1_3071	0.473901	0.54347	0.265092	0.422368
lcl|NC_003423.3_cds_NP_595761.1_3072	0.447783	0.523794	0.25473	0.394116
lcl|NC_003423.3_cds_NP_595762.1_3073	0.443546	0.486002	0.258662	0.394571
lcl|NC_003423.3_cds_NP_595763.1_3074	0.426553	0.47889	0.247636	0.380603
lcl|NC_003423.3_cds_NP_595764.1_3075	0.452078	0.530014	0.230271	0.395369
lcl|NC_003423.3_cds_NP_595765.1_3077	0.408235	0.451516	0.241356	0.36704
lcl|NC_003423.3_cds_NP_595766.1_3078	0.440385	0.529271	0.2247	0.383983
lcl|NC_003423.3_cds_NP_595767.1_3079	0.43045	0.451288	0.240497	0.375863
lcl|NC_003423.3_cds_NP_595768.1_3080	0.467621	0.499337	0.292575	0.423349
lcl|NC_003423.3_cds_NP_595769.1_3081	0.411115	0.435704	0.229472	0.367344
lcl|NC_003423.3_cds_NP_595770.1_3082	0.439532	0.519801	0.216108	0.380366
lcl|NC_003423.3_cds_NP_595771.1_3083	0.437426	0.474171	0.221561	0.382426
lcl|NC_003423.3_cds_NP_595772.1_3084	0.50808	0.612854	0.274378	0.445869
lcl|NC_003423.3_cds_NP_595773.1_3085	0.504055	0.569378	0.259884	0.438568
lcl|NC_003423.3_cds_NP_595776.1_3087	0.439397	0.543185	0.257451	0.389011
lcl|NC_003423.3_cds_NP_595777.1_3088	0.427732	0.498243	0.242723	0.378682
lcl|NC_003423.3_cds_NP_595778.1_3089	0.429518	0.473014	0.231821	0.382897
lcl|NC_003423.3_cds_NP_595779.1_3090	0.440421	0.51293	0.212835	0.380228
lcl|NC_003423.3_cds_NP_595780.1_3091	0.436836	0.481002	0.229445	0.384643
lcl|NC_003423.3_cds_NP_595781.1_3092	0.481165	0.560522	0.272277	0.423468
lcl|NC_003423.3_cds_NP_595782.1_3093	0.412781	0.457081	0.230253	0.36838
lcl|NC_003423.3_cds_NP_595783.2_3094	0.469472	0.503298	0.312569	0.431015
lcl|NC_003423.3_cds_NP_595784.1_3095	0.484181	0.528723	0.284353	0.431269
lcl|NC_003423.3_cds_NP_595785.1_3096	0.409415	0.459037	0.23217	0.364643
lcl|NC_003423.3_cds_NP_595787.1_3098	0.523403	0.630572	0.272231	0.457423
lcl|NC_003423.3_cds_NP_595788.1_3099	0.42291	0.439005	0.226132	0.371101
lcl|NC_003423.3_cds_NP_595789.1_3100	0.431551	0.524605	0.240368	0.380325
lcl|NC_003423.3_cds_NP_595790.1_3101	0.419538	0.485259	0.24688	0.372845
lcl|NC_003423.3_cds_NP_595791.1_3102	0.478222	0.543424	0.262635	0.422082
lcl|NC_003423.3_cds_NP_595792.1_3103	0.445896	0.483637	0.262024	0.396458
lcl|NC_003423.3_cds_NP_595793.1_3104	0.4638	0.504252	0.242872	0.406984
lcl|NC_003423.3_cds_NP_595794.1_3105	0.468365	0.508605	0.2509	0.410712
lcl|NC_003423.3_cds_NP_595795.1_3106	0.480589	0.554197	0.256192	0.422029
lcl|NC_003423.3_cds_NP_595796.1_3107	0.413895	0.467465	0.229409	0.365687
lcl|NC_003423.3_cds_NP_595797.1_3108	0.482138	0.521919	0.35675	0.454776
lcl|NC_003423.3_cds_NP_595798.1_3111	0.347122	0.362086	0.20348	0.318984
lcl|NC_003423.3_cds_NP_595799.2_3112	0.420069	0.449488	0.217717	0.371325
lcl|NC_003423.3_cds_NP_595801.1_3114	0.43848	0.528647	0.232654	0.3859
lcl|NC_003423.3_cds_NP_595802.1_3115	0.602343	0.677725	0.387581	0.535372
lcl|NC_003423.3_cds_NP_595803.1_3116	0.377343	0.402548	0.214636	0.339004
lcl|NC_003423.3_cds_NP_595804.2_3117	0.575138	0.697731	0.348591	0.510472
lcl|NC_003423.3_cds_NP_595805.1_3118	0.463052	0.502767	0.254215	0.409717
lcl|NC_003423.3_cds_NP_595806.1_3119	0.446599	0.51844	0.229934	0.388273
lcl|NC_003423.3_cds_NP_595808.3_3121	0.402389	0.447516	0.215297	0.354373
lcl|NC_003423.3_cds_NP_595809.1_3122	0.469856	0.511299	0.238927	0.407659
lcl|NC_003423.3_cds_NP_595810.1_3123	0.494833	0.54208	0.283061	0.43785
lcl|NC_003423.3_cds_NP_595811.1_3124	0.452491	0.530969	0.293682	0.410735
lcl|NC_003423.3_cds_NP_595812.1_3125	0.44993	0.509026	0.253473	0.396392
lcl|NC_003423.3_cds_NP_595813.2_3126	0.42541	0.505054	0.231477	0.374781
lcl|NC_003423.3_cds_NP_595814.1_3127	0.428448	0.489049	0.223019	0.375254
lcl|NC_003423.3_cds_NP_595815.1_3128	0.3422	0.352901	0.22209	0.316487
lcl|NC_003423.3_cds_NP_595817.1_3130	0.411116	0.455143	0.244185	0.363094
lcl|NC_003423.3_cds_NP_595818.1_3132	0.387191	0.380526	0.241748	0.353441
lcl|NC_003423.3_cds_NP_595819.2_3133	0.50671	0.593285	0.265203	0.443777
lcl|NC_003423.3_cds_NP_595820.1_3134	0.428565	0.484487	0.232738	0.381301
lcl|NC_003423.3_cds_NP_595821.1_3135	0.443732	0.496115	0.245155	0.39222
lcl|NC_003423.3_cds_NP_595822.1_3136	0.437211	0.496687	0.250459	0.38877
lcl|NC_003423.3_cds_NP_595823.1_3137	0.559223	0.664859	0.300538	0.488161
lcl|NC_003423.3_cds_NP_595824.1_3138	0.40092	0.440854	0.263666	0.360302
lcl|NC_003423.3_cds_NP_595825.1_3139	0.405015	0.430012	0.234581	0.35982
lcl|NC_003423.3_cds_NP_595826.1_3140	0.436914	0.485429	0.272107	0.391404
lcl|NC_003423.3_cds_NP_595827.1_3141	0.511462	0.577725	0.303856	0.456727
lcl|NC_003423.3_cds_NP_595828.2_3142	0.498013	0.593809	0.332629	0.44962
lcl|NC_003423.3_cds_NP_595829.1_3144	0.448578	0.479018	0.254342	0.398271
lcl|NC_003423.3_cds_NP_595830.1_3145	0.493926	0.574128	0.290861	0.440455
lcl|NC_003423.3_cds_NP_595831.1_3146	0.438751	0.512243	0.243489	0.388088
lcl|NC_003423.3_cds_NP_595832.1_3147	0.656489	0.76754	0.474526	0.600624
lcl|NC_003423.3_cds_NP_595833.1_3148	0.375791	0.407221	0.197036	0.329526
lcl|NC_003423.3_cds_NP_595834.2_3149	0.458874	0.516025	0.247803	0.404886
lcl|NC_003423.3_cds_NP_595835.2_3150	0.455861	0.528848	0.262404	0.406623
lcl|NC_003423.3_cds_NP_595836.2_3151	0.433953	0.496383	0.265583	0.389369
lcl|NC_003423.3_cds_NP_595837.1_3152	0.490367	0.589346	0.280233	0.432238
lcl|NC_003423.3_cds_NP_595838.1_3153	0.483263	0.58182	0.296809	0.427003
lcl|NC_003423.3_cds_NP_595839.1_3154	0.403168	0.427758	0.225375	0.359163
lcl|NC_003423.3_cds_NP_595840.1_3155	0.607326	0.758622	0.356433	0.542354
lcl|NC_003423.3_cds_NP_595841.1_3156	0.416347	0.450309	0.227622	0.368728
lcl|NC_003423.3_cds_NP_595842.1_3157	0.394288	0.435246	0.213854	0.347924
lcl|NC_003423.3_cds_NP_595843.1_3158	0.437104	0.503003	0.234507	0.387696
lcl|NC_003423.3_cds_NP_595844.1_3159	0.489407	0.568909	0.315473	0.438932
lcl|NC_003423.3_cds_NP_595845.1_3160	0.423749	0.4829	0.25422	0.378702
lcl|NC_003423.3_cds_NP_595846.1_3161	0.502431	0.595181	0.25863	0.435911
lcl|NC_003423.3_cds_NP_595847.1_3162	0.460134	0.526967	0.222275	0.40103
lcl|NC_003423.3_cds_NP_595848.1_3163	0.480686	0.571898	0.257982	0.42286
lcl|NC_003423.3_cds_NP_595849.1_3164	0.437285	0.501398	0.271776	0.391673
lcl|NC_003423.3_cds_NP_595850.1_3165	0.616486	0.802275	0.381152	0.547904
lcl|NC_003423.3_cds_NP_595851.1_3166	0.400401	0.459427	0.213153	0.350431
lcl|NC_003423.3_cds_NP_595852.1_3167	0.613349	0.706137	0.404012	0.552505
lcl|NC_003423.3_cds_NP_595853.1_3168	0.467215	0.501125	0.290153	0.420028
lcl|NC_003423.3_cds_NP_595854.1_3169	0.411701	0.445224	0.240544	0.362526
lcl|NC_003423.3_cds_NP_595855.3_3170	0.391141	0.437513	0.196776	0.336478
lcl|NC_003423.3_cds_NP_595856.1_3171	0.385597	0.444659	0.186075	0.340432
lcl|NC_003423.3_cds_NP_595857.1_3172	0.404807	0.438518	0.216208	0.353392
lcl|NC_003423.3_cds_NP_595858.1_3173	0.462965	0.515733	0.262783	0.406489
lcl|NC_003423.3_cds_NP_595859.2_3174	0.403233	0.441134	0.226407	0.358057
lcl|NC_003423.3_cds_NP_595860.2_3175	0.400468	0.420959	0.232968	0.361252
lcl|NC_003423.3_cds_NP_595861.1_3176	0.432002	0.517548	0.187139	0.37027
lcl|NC_003423.3_cds_NP_595862.1_3177	0.4169	0.463538	0.236474	0.369198
lcl|NC_003423.3_cds_NP_595863.1_3178	0.579562	0.728412	0.307449	0.507556
lcl|NC_003423.3_cds_NP_595864.3_3179	0.435159	0.482225	0.264909	0.385323
lcl|NC_003423.3_cds_NP_595865.1_3180	0.413732	0.485153	0.251218	0.363912
lcl|NC_003423.3_cds_NP_595866.1_3181	0.481288	0.552432	0.290208	0.42488
lcl|NC_003423.3_cds_NP_595867.1_3183	0.444196	0.504528	0.266906	0.394686
lcl|NC_003423.3_cds_NP_595868.1_3184	0.423792	0.433216	0.242466	0.382212
lcl|NC_003423.3_cds_NP_595869.1_3185	0.41402	0.45921	0.294083	0.373812
lcl|NC_003423.3_cds_NP_595870.1_3186	0.495885	0.557434	0.290805	0.440954
lcl|NC_003423.3_cds_NP_595871.1_3187	0.461823	0.501962	0.268413	0.406823
lcl|NC_003423.3_cds_NP_595872.1_3188	0.413874	0.505592	0.297011	0.384599
lcl|NC_003423.3_cds_NP_595873.1_3189	0.524987	0.563769	0.342839	0.469102
lcl|NC_003423.3_cds_NP_595874.1_3190	0.415419	0.529019	0.289508	0.364718
lcl|NC_003423.3_cds_NP_595875.1_3191	0.444196	0.504528	0.266906	0.394686
lcl|NC_003423.3_cds_NP_595876.1_3192	0.429107	0.467171	0.271217	0.385425
lcl|NC_003423.3_cds_NP_595877.1_3193	0.487522	0.544519	0.24698	0.428538
lcl|NC_003423.3_cds_NP_595878.1_3194	0.478909	0.535985	0.254133	0.415421
lcl|NC_003423.3_cds_NP_595879.1_3195	0.623818	0.738954	0.395857	0.556869
lcl|NC_003423.3_cds_NP_595880.1_3197	0.488515	0.563578	0.266301	0.430221
lcl|NC_003423.3_cds_NP_595881.1_3198	0.520507	0.601073	0.298112	0.460456
lcl|NC_003423.3_cds_NP_595882.2_3199	0.419958	0.489341	0.227636	0.365606
lcl|NC_003423.3_cds_NP_595883.2_3200	0.456977	0.517895	0.239804	0.401709
lcl|NC_003423.3_cds_NP_595884.1_3201	0.448514	0.537022	0.243619	0.396257
lcl|NC_003423.3_cds_NP_595885.1_3202	0.440731	0.50565	0.232647	0.38484
lcl|NC_003423.3_cds_NP_595886.1_3203	0.477424	0.510088	0.290155	0.429649
lcl|NC_003423.3_cds_NP_595887.1_3204	0.422646	0.464427	0.243647	0.374424
lcl|NC_003423.3_cds_NP_595889.1_3206	0.470285	0.536774	0.244942	0.412476
lcl|NC_003423.3_cds_NP_595890.2_3207	0.447051	0.488477	0.242882	0.395179
lcl|NC_003423.3_cds_NP_595891.1_3208	0.452018	0.518786	0.246012	0.397697
lcl|NC_003423.3_cds_NP_595892.1_3209	0.540759	0.666583	0.30956	0.478336
lcl|NC_003423.3_cds_NP_595893.1_3210	0.419035	0.514792	0.229114	0.370107
lcl|NC_003423.3_cds_NP_595894.1_3211	0.421408	0.484593	0.204887	0.364409
lcl|NC_003423.3_cds_NP_595895.1_3212	0.462663	0.577286	0.256718	0.408687
lcl|NC_003423.3_cds_NP_595896.1_3213	0.620322	0.698911	0.412986	0.562357
lcl|NC_003423.3_cds_NP_595897.1_3214	0.438856	0.498073	0.241614	0.388636
lcl|NC_003423.3_cds_NP_595898.1_3215	0.535152	0.631003	0.309482	0.475353
lcl|NC_003423.3_cds_NP_595899.1_3216	0.645904	0.781715	0.37796	0.575824
lcl|NC_003423.3_cds_NP_595900.1_3217	0.55778	0.664371	0.301952	0.489886
lcl|NC_003423.3_cds_NP_595901.1_3218	0.40806	0.455064	0.239481	0.362403
lcl|NC_003423.3_cds_NP_595902.1_3219	0.402723	0.433629	0.237192	0.356947
lcl|NC_003423.3_cds_NP_595903.1_3220	0.669378	0.818913	0.400142	0.598309
lcl|NC_003423.3_cds_NP_595904.2_3221	0.436319	0.44461	0.272769	0.390113
lcl|NC_003423.3_cds_NP_595905.1_3222	0.460528	0.492155	0.279384	0.410266
lcl|NC_003423.3_cds_NP_595906.1_3223	0.537579	0.638252	0.285573	0.472091
lcl|NC_003423.3_cds_NP_595907.1_3224	0.524252	0.60255	0.317711	0.471062
lcl|NC_003423.3_cds_NP_595908.1_3225	0.481584	0.547545	0.253501	0.422041
lcl|NC_003423.3_cds_NP_595909.1_3226	0.50451	0.578211	0.292689	0.448321
lcl|NC_003423.3_cds_NP_595910.1_3227	0.428022	0.487816	0.246766	0.378428
lcl|NC_003423.3_cds_NP_595912.3_3229	0.406815	0.446703	0.249517	0.364601
lcl|NC_003423.3_cds_NP_595914.2_3231	0.402644	0.416416	0.201457	0.34505
lcl|NC_003423.3_cds_NP_595915.1_3232	0.449198	0.506454	0.241033	0.393781
lcl|NC_003423.3_cds_NP_595916.1_3233	0.423813	0.517282	0.209419	0.368172
lcl|NC_003423.3_cds_NP_595917.1_3234	0.462077	0.544665	0.265405	0.411163
lcl|NC_003423.3_cds_NP_595918.1_3235	0.425666	0.468342	0.229323	0.372024
lcl|NC_003423.3_cds_NP_595919.1_3236	0.448289	0.499994	0.272688	0.403023
lcl|NC_003423.3_cds_NP_595920.1_3237	0.449904	0.496741	0.240684	0.39592
lcl|NC_003423.3_cds_NP_595921.2_3238	0.415318	0.504845	0.237851	0.370855
lcl|NC_003423.3_cds_NP_595922.2_3239	0.437269	0.504955	0.235729	0.382806
lcl|NC_003423.3_cds_NP_595923.1_3240	0.417792	0.4841	0.220225	0.366416
lcl|NC_003423.3_cds_NP_595924.1_3241	0.497345	0.579448	0.27183	0.43399
lcl|NC_003423.3_cds_NP_595925.1_3242	0.440767	0.494188	0.249292	0.389327
lcl|NC_003423.3_cds_NP_595926.1_3243	0.433475	0.481179	0.210487	0.376986
lcl|NC_003423.3_cds_NP_595927.1_3244	0.444761	0.478173	0.214628	0.3871
lcl|NC_003423.3_cds_NP_595928.1_3245	0.461141	0.558783	0.210505	0.397569
lcl|NC_003423.3_cds_NP_595929.1_3246	0.435057	0.47767	0.225675	0.383138
lcl|NC_003423.3_cds_NP_595930.1_3247	0.403286	0.445785	0.221481	0.35696
lcl|NC_003423.3_cds_NP_595931.1_3248	0.432409	0.504305	0.235815	0.379553
lcl|NC_003423.3_cds_NP_595932.1_3249	0.446843	0.481578	0.256754	0.398188
lcl|NC_003423.3_cds_NP_595933.1_3250	0.397668	0.451246	0.229024	0.353598
lcl|NC_003423.3_cds_NP_595935.2_3252	0.45683	0.508909	0.257628	0.406511
lcl|NC_003423.3_cds_NP_595936.1_3253	0.437621	0.481978	0.248851	0.389568
lcl|NC_003423.3_cds_NP_595937.1_3254	0.466229	0.547689	0.25673	0.410494
lcl|NC_003423.3_cds_NP_595938.1_3255	0.384116	0.45031	0.185934	0.3316
lcl|NC_003423.3_cds_NP_595939.1_3256	0.526407	0.632563	0.3075	0.468499
lcl|NC_003423.3_cds_NP_595940.1_3257	0.448198	0.513396	0.224797	0.387933
lcl|NC_003423.3_cds_NP_595941.1_3258	0.501623	0.549561	0.30249	0.451415
lcl|NC_003423.3_cds_NP_595942.1_3259	0.390569	0.438208	0.249659	0.351349
lcl|NC_003423.3_cds_NP_595944.2_3261	0.473818	0.562294	0.292002	0.42493
lcl|NC_003423.3_cds_NP_595945.1_3262	0.457781	0.525452	0.248357	0.398948
lcl|NC_003423.3_cds_NP_595946.1_3263	0.630786	0.788563	0.357871	0.554297
lcl|NC_003423.3_cds_NP_595947.2_3264	0.412486	0.447762	0.239576	0.369215
lcl|NC_003423.3_cds_NP_595948.1_3265	0.405109	0.424129	0.239089	0.363098
lcl|NC_003423.3_cds_NP_595949.1_3266	0.498978	0.543128	0.287535	0.442613
lcl|NC_003423.3_cds_NP_595950.1_3267	0.463681	0.540314	0.255957	0.408578
lcl|NC_003423.3_cds_NP_595952.1_3269	0.404847	0.434962	0.2094	0.354918
lcl|NC_003423.3_cds_NP_595953.1_3270	0.427392	0.521948	0.233594	0.374297
lcl|NC_003423.3_cds_NP_595954.2_3271	0.480902	0.546974	0.270713	0.424677
lcl|NC_003423.3_cds_NP_595955.1_3272	0.443287	0.466626	0.281678	0.403653
lcl|NC_003423.3_cds_NP_595956.1_3273	0.406096	0.434293	0.24628	0.362863
lcl|NC_003423.3_cds_NP_595957.1_3274	0.404828	0.438849	0.22136	0.359004
lcl|NC_003423.3_cds_NP_595959.1_3276	0.422794	0.473778	0.24229	0.378236
lcl|NC_003423.3_cds_NP_595960.1_3277	0.426426	0.48682	0.219173	0.37167
lcl|NC_003423.3_cds_NP_595961.1_3278	0.40542	0.46596	0.234422	0.364515
lcl|NC_003423.3_cds_NP_595962.1_3279	0.432209	0.486618	0.219024	0.375201
lcl|NC_003423.3_cds_NP_595963.1_3280	0.520521	0.613016	0.275034	0.456272
lcl|NC_003423.3_cds_NP_595965.1_3283	0.405784	0.484371	0.202283	0.351644
lcl|NC_003423.3_cds_NP_595969.1_3286	0.625534	0.68359	0.439746	0.567141
lcl|NC_003423.3_cds_NP_595970.1_3287	0.433791	0.496654	0.261297	0.386722
lcl|NC_003423.3_cds_NP_595971.1_3288	0.458367	0.547098	0.234097	0.400341
lcl|NC_003423.3_cds_NP_595973.1_3290	0.439663	0.533752	0.247085	0.385546
lcl|NC_003423.3_cds_NP_595974.1_3291	0.416353	0.452867	0.235457	0.368322
lcl|NC_003423.3_cds_NP_595975.1_3292	0.434277	0.465959	0.229255	0.382392
lcl|NC_003423.3_cds_NP_595976.2_3293	0.473286	0.53016	0.287709	0.424577
lcl|NC_003423.3_cds_NP_595979.1_3295	0.445702	0.466186	0.241437	0.393172
lcl|NC_003423.3_cds_NP_595980.1_3296	0.397332	0.438628	0.226408	0.353007
lcl|NC_003423.3_cds_NP_595981.1_3297	0.415078	0.43327	0.245683	0.371269
lcl|NC_003423.3_cds_NP_595982.1_3299	0.488309	0.547657	0.292958	0.436681
lcl|NC_003423.3_cds_NP_595983.2_3300	0.466736	0.553925	0.264053	0.410946
lcl|NC_003423.3_cds_NP_595984.1_3301	0.443898	0.511984	0.229305	0.389708
lcl|NC_003423.3_cds_NP_595985.1_3302	0.452595	0.523	0.241586	0.398988
lcl|NC_003423.3_cds_NP_595986.1_3303	0.45255	0.510762	0.248571	0.396535
lcl|NC_003423.3_cds_NP_595987.1_3304	0.40901	0.484173	0.175913	0.352026
lcl|NC_003423.3_cds_NP_595988.2_3305	0.41929	0.474879	0.228453	0.373849
lcl|NC_003423.3_cds_NP_595989.1_3306	0.44166	0.466144	0.272183	0.403031
lcl|NC_003423.3_cds_NP_595991.2_3308	0.431501	0.486911	0.243064	0.38237
lcl|NC_003423.3_cds_NP_595992.2_3309	0.415007	0.474895	0.227279	0.369553
lcl|NC_003423.3_cds_NP_595993.1_3310	0.416712	0.458205	0.233552	0.368061
lcl|NC_003423.3_cds_NP_595995.1_3312	0.42603	0.482611	0.244176	0.380272
lcl|NC_003423.3_cds_NP_595996.1_3313	0.434763	0.465513	0.26777	0.389954
lcl|NC_003423.3_cds_NP_595997.1_3314	0.354196	0.381807	0.207171	0.316315
lcl|NC_003423.3_cds_NP_595998.1_3315	0.526755	0.62842	0.287361	0.462461
lcl|NC_003423.3_cds_NP_595999.1_3316	0.447709	0.512105	0.226999	0.395615
lcl|NC_003423.3_cds_NP_596000.2_3317	0.397729	0.418162	0.227757	0.353058
[truncated: 3,133 more rows]

## Sheet: Aspergillus fumigatus
gene id	gtAI	CAI	StAI	tAI
lcl|NC_007194.1_cds_XP_001481690.1_1	0.316547	0.38816	0.23149	0.273424
lcl|NC_007194.1_cds_XP_001481691.1_80	0.410362	0.608823	0.298505	0.357372
lcl|NC_007194.1_cds_XP_001481692.1_81	0.466008	0.686133	0.366447	0.435218
lcl|NC_007194.1_cds_XP_001481693.1_90	0.362444	0.407611	0.294592	0.344575
lcl|NC_007194.1_cds_XP_001481694.1_184	0.455251	0.56646	0.360669	0.424229
lcl|NC_007194.1_cds_XP_001481695.1_185	0.413546	0.46806	0.338441	0.39183
lcl|NC_007194.1_cds_XP_001481696.1_254	0.397251	0.518879	0.301776	0.356839
lcl|NC_007194.1_cds_XP_001481697.1_255	0.356681	0.401861	0.271185	0.324665
lcl|NC_007194.1_cds_XP_001481698.1_261	0.393549	0.458357	0.293461	0.355005
lcl|NC_007194.1_cds_XP_001481699.1_262	0.491635	0.685631	0.399119	0.456811
lcl|NC_007194.1_cds_XP_001481700.1_291	0.390773	0.49006	0.305567	0.366072
lcl|NC_007194.1_cds_XP_001481701.1_352	0.3444	0.387479	0.274968	0.321539
lcl|NC_007194.1_cds_XP_001481702.1_355	0.51789	0.769079	0.41228	0.470733
lcl|NC_007194.1_cds_XP_001481703.1_356	0.355291	0.392524	0.285063	0.336305
lcl|NC_007194.1_cds_XP_001481704.1_395	0.390654	0.465673	0.309803	0.362462
lcl|NC_007194.1_cds_XP_001481705.1_399	0.333745	0.393554	0.261024	0.301067
lcl|NC_007194.1_cds_XP_001481706.1_504	0.39272	0.46425	0.316802	0.366606
lcl|NC_007194.1_cds_XP_001481707.1_505	0.353466	0.439022	0.283715	0.33958
lcl|NC_007194.1_cds_XP_001481708.1_511	0.354071	0.414413	0.280546	0.332943
lcl|NC_007194.1_cds_XP_001481709.1_512	0.353912	0.394088	0.278692	0.335366
lcl|NC_007194.1_cds_XP_001481710.1_554	0.345389	0.436849	0.257331	0.308269
lcl|NC_007194.1_cds_XP_001481711.1_555	0.397391	0.488439	0.299017	0.358242
lcl|NC_007194.1_cds_XP_001481712.1_622	0.345357	0.375927	0.27902	0.328875
lcl|NC_007194.1_cds_XP_001481713.1_695	0.348529	0.423765	0.273996	0.32251
lcl|NC_007194.1_cds_XP_001481714.1_696	0.346281	0.385129	0.277569	0.32603
lcl|NC_007194.1_cds_XP_001481715.1_704	0.316762	0.347648	0.248388	0.29528
lcl|NC_007194.1_cds_XP_001481716.1_722	0.326905	0.35414	0.265565	0.307468
lcl|NC_007194.1_cds_XP_001481717.1_818	0.364021	0.478281	0.29616	0.353298
lcl|NC_007194.1_cds_XP_001481718.1_819	0.33556	0.397819	0.275347	0.321638
lcl|NC_007194.1_cds_XP_001481719.1_842	0.379532	0.416765	0.309965	0.356852
lcl|NC_007194.1_cds_XP_001481720.1_876	0.385163	0.474142	0.309235	0.358874
lcl|NC_007194.1_cds_XP_001481721.1_893	0.371172	0.458952	0.294538	0.346431
lcl|NC_007194.1_cds_XP_001481722.1_905	0.325092	0.411501	0.221582	0.280598
lcl|NC_007194.1_cds_XP_001481723.1_906	0.401497	0.505849	0.311897	0.363812
lcl|NC_007194.1_cds_XP_001481724.1_1012	0.365802	0.397271	0.295823	0.343178
lcl|NC_007194.1_cds_XP_001481725.1_1013	0.326938	0.398842	0.259617	0.306295
lcl|NC_007194.1_cds_XP_001481726.1_1075	0.398192	0.493264	0.323963	0.378026
lcl|NC_007194.1_cds_XP_001481727.1_1129	0.32832	0.343294	0.260625	0.309468
lcl|NC_007194.1_cds_XP_001481728.1_1162	0.452858	0.590317	0.359541	0.424236
lcl|NC_007194.1_cds_XP_001481729.1_1309	0.381655	0.452238	0.303068	0.358209
lcl|NC_007194.1_cds_XP_001481730.1_1310	0.376916	0.391302	0.312754	0.35363
lcl|NC_007194.1_cds_XP_001481731.1_1334	0.350645	0.449483	0.280261	0.329107
lcl|NC_007194.1_cds_XP_001481732.1_1335	0.381253	0.478024	0.299788	0.361608
lcl|NC_007194.1_cds_XP_001481733.1_1494	0.33427	0.384479	0.271636	0.323003
lcl|NC_007194.1_cds_XP_001481734.1_1502	0.390342	0.468381	0.317784	0.371315
lcl|NC_007194.1_cds_XP_001481735.1_1503	0.361358	0.440452	0.280898	0.333834
lcl|NC_007194.1_cds_XP_001481736.1_1608	0.362588	0.407346	0.287586	0.352849
lcl|NC_007194.1_cds_XP_749763.1_2	0.402535	0.520535	0.326667	0.382396
lcl|NC_007194.1_cds_XP_749764.1_3	0.341976	0.421878	0.292098	0.33369
lcl|NC_007194.1_cds_XP_749765.1_4	0.37654	0.396522	0.307912	0.366706
lcl|NC_007194.1_cds_XP_749767.1_5	0.332129	0.381153	0.273687	0.322848
lcl|NC_007194.1_cds_XP_749768.1_6	0.363831	0.456088	0.286236	0.329168
lcl|NC_007194.1_cds_XP_749769.1_7	0.316054	0.419109	0.264056	0.309978
lcl|NC_007194.1_cds_XP_749770.1_8	0.340733	0.416361	0.263643	0.311735
lcl|NC_007194.1_cds_XP_749772.1_9	0.342621	0.390228	0.271467	0.318993
lcl|NC_007194.1_cds_XP_749773.1_10	0.330091	0.389378	0.262343	0.312469
lcl|NC_007194.1_cds_XP_749774.1_11	0.341234	0.384837	0.270036	0.316658
lcl|NC_007194.1_cds_XP_749775.1_12	0.354448	0.409054	0.279687	0.324129
lcl|NC_007194.1_cds_XP_749777.2_13	0.334321	0.378002	0.263537	0.313541
lcl|NC_007194.1_cds_XP_749779.1_14	0.377273	0.404035	0.300186	0.352451
lcl|NC_007194.1_cds_XP_749780.1_15	0.35015	0.400994	0.286976	0.330988
lcl|NC_007194.1_cds_XP_749783.2_16	0.403722	0.492427	0.327968	0.387337
lcl|NC_007194.1_cds_XP_749784.1_17	0.406252	0.439948	0.34291	0.38948
lcl|NC_007194.1_cds_XP_749785.1_18	0.355398	0.465282	0.27469	0.335866
lcl|NC_007194.1_cds_XP_749786.1_19	0.325649	0.360204	0.263019	0.307054
lcl|NC_007194.1_cds_XP_749787.2_20	0.330122	0.382877	0.25315	0.294802
lcl|NC_007194.1_cds_XP_749792.1_21	0.314886	0.325066	0.238454	0.276862
lcl|NC_007194.1_cds_XP_749794.2_22	0.403739	0.520035	0.325258	0.384456
lcl|NC_007194.1_cds_XP_749796.1_23	0.403678	0.520391	0.319814	0.381213
lcl|NC_007194.1_cds_XP_749797.1_24	0.395109	0.495047	0.304163	0.358385
lcl|NC_007194.1_cds_XP_749799.1_25	0.385601	0.435502	0.305898	0.362532
lcl|NC_007194.1_cds_XP_749800.1_26	0.373297	0.413631	0.305319	0.357367
lcl|NC_007194.1_cds_XP_749801.1_27	0.342506	0.389396	0.264573	0.310148
lcl|NC_007194.1_cds_XP_749802.1_28	0.359504	0.421279	0.280256	0.331104
lcl|NC_007194.1_cds_XP_749803.1_29	0.359661	0.383431	0.287577	0.341529
lcl|NC_007194.1_cds_XP_749804.1_30	0.346924	0.399219	0.27429	0.323617
lcl|NC_007194.1_cds_XP_749805.1_31	0.441557	0.578603	0.359779	0.411787
lcl|NC_007194.1_cds_XP_749807.1_32	0.330797	0.382012	0.267075	0.313201
lcl|NC_007194.1_cds_XP_749808.2_33	0.3178	0.347414	0.252919	0.302823
lcl|NC_007194.1_cds_XP_749810.2_34	0.334272	0.425696	0.259007	0.298477
lcl|NC_007194.1_cds_XP_749813.1_35	0.338732	0.399683	0.26869	0.317185
lcl|NC_007194.1_cds_XP_749815.1_36	0.344763	0.40357	0.275958	0.323009
lcl|NC_007194.1_cds_XP_749816.1_37	0.37676	0.456766	0.305906	0.36736
lcl|NC_007194.1_cds_XP_749817.1_38	0.350909	0.401194	0.279985	0.340069
lcl|NC_007194.1_cds_XP_749818.1_39	0.361991	0.413949	0.288392	0.336065
lcl|NC_007194.1_cds_XP_749819.1_40	0.381216	0.43364	0.318951	0.375345
lcl|NC_007194.1_cds_XP_749821.1_41	0.432954	0.471884	0.364673	0.416518
lcl|NC_007194.1_cds_XP_749822.1_42	0.343202	0.400735	0.26669	0.315802
lcl|NC_007194.1_cds_XP_749823.1_43	0.355834	0.410513	0.287627	0.333423
lcl|NC_007194.1_cds_XP_749824.1_44	0.365628	0.414467	0.310179	0.357256
lcl|NC_007194.1_cds_XP_749825.1_45	0.351049	0.411822	0.281272	0.336306
lcl|NC_007194.1_cds_XP_749826.1_46	0.351797	0.426467	0.285071	0.333989
lcl|NC_007194.1_cds_XP_749827.1_47	0.342126	0.380908	0.272499	0.323757
lcl|NC_007194.1_cds_XP_749828.1_48	0.418829	0.469719	0.336805	0.384633
lcl|NC_007194.1_cds_XP_749829.1_49	0.353244	0.437742	0.267411	0.319238
lcl|NC_007194.1_cds_XP_749830.1_50	0.367047	0.398141	0.297609	0.341593
lcl|NC_007194.1_cds_XP_749831.1_51	0.33938	0.374277	0.272992	0.315359
lcl|NC_007194.1_cds_XP_749832.2_52	0.336412	0.397392	0.261511	0.305982
lcl|NC_007194.1_cds_XP_749833.1_53	0.433608	0.549214	0.335149	0.390308
lcl|NC_007194.1_cds_XP_749834.1_54	0.34908	0.38533	0.285911	0.322568
lcl|NC_007194.1_cds_XP_749835.1_55	0.371536	0.407436	0.309029	0.360544
lcl|NC_007194.1_cds_XP_749836.1_56	0.31987	0.359099	0.251548	0.293854
lcl|NC_007194.1_cds_XP_749837.1_57	0.341158	0.38337	0.275741	0.321745
lcl|NC_007194.1_cds_XP_749839.2_58	0.359283	0.410642	0.294303	0.349419
lcl|NC_007194.1_cds_XP_749841.1_59	0.358365	0.415455	0.299506	0.353775
lcl|NC_007194.1_cds_XP_749842.2_60	0.357362	0.374283	0.291021	0.348136
lcl|NC_007194.1_cds_XP_749843.1_61	0.362204	0.420599	0.277282	0.336155
lcl|NC_007194.1_cds_XP_749845.1_62	0.328203	0.364476	0.266019	0.298408
lcl|NC_007194.1_cds_XP_749847.1_63	0.379713	0.485339	0.286576	0.343822
lcl|NC_007194.1_cds_XP_749848.1_64	0.413956	0.537305	0.324119	0.380359
lcl|NC_007194.1_cds_XP_749849.1_65	0.423253	0.548771	0.312645	0.385525
lcl|NC_007194.1_cds_XP_749850.1_66	0.434429	0.603974	0.329	0.394579
lcl|NC_007194.1_cds_XP_749851.1_67	0.402222	0.508831	0.312241	0.368954
lcl|NC_007194.1_cds_XP_749852.1_68	0.330862	0.383814	0.256758	0.307119
lcl|NC_007194.1_cds_XP_749854.2_69	0.338773	0.370643	0.256989	0.313333
lcl|NC_007194.1_cds_XP_749855.1_70	0.361442	0.389585	0.297009	0.340517
lcl|NC_007194.1_cds_XP_749857.1_71	0.364029	0.45984	0.289913	0.341249
lcl|NC_007194.1_cds_XP_749858.1_72	0.353042	0.360313	0.292227	0.341496
lcl|NC_007194.1_cds_XP_749859.1_73	0.363938	0.420017	0.295065	0.343531
lcl|NC_007194.1_cds_XP_749860.1_74	0.358584	0.387734	0.297965	0.343786
lcl|NC_007194.1_cds_XP_749861.1_75	0.369848	0.445907	0.28504	0.332219
lcl|NC_007194.1_cds_XP_749862.1_76	0.436046	0.582363	0.354553	0.426474
lcl|NC_007194.1_cds_XP_749863.1_77	0.359711	0.457276	0.264715	0.31611
lcl|NC_007194.1_cds_XP_749864.1_78	0.37085	0.439724	0.299562	0.346877
lcl|NC_007194.1_cds_XP_749865.2_79	0.371272	0.438501	0.29278	0.349697
lcl|NC_007194.1_cds_XP_749869.1_82	0.43096	0.603386	0.319266	0.387808
lcl|NC_007194.1_cds_XP_749870.1_83	0.403149	0.568841	0.311515	0.370761
lcl|NC_007194.1_cds_XP_749871.1_84	0.333067	0.455166	0.256449	0.30618
lcl|NC_007194.1_cds_XP_749872.1_85	0.412389	0.567368	0.322248	0.381997
lcl|NC_007194.1_cds_XP_749873.1_86	0.36394	0.464451	0.285985	0.337421
lcl|NC_007194.1_cds_XP_749874.1_87	0.361224	0.451643	0.283428	0.336252
lcl|NC_007194.1_cds_XP_749875.1_88	0.361753	0.460796	0.285868	0.33679
lcl|NC_007194.1_cds_XP_749876.2_89	0.402876	0.524446	0.314065	0.368763
lcl|NC_007194.1_cds_XP_749877.1_91	0.367314	0.477608	0.278591	0.330025
lcl|NC_007194.1_cds_XP_749879.1_92	0.359133	0.413999	0.269966	0.322536
lcl|NC_007194.1_cds_XP_749880.1_93	0.416013	0.531991	0.3357	0.388874
lcl|NC_007194.1_cds_XP_749881.1_94	0.348698	0.420131	0.268321	0.32447
lcl|NC_007194.1_cds_XP_749882.1_95	0.394668	0.51821	0.297306	0.358741
lcl|NC_007194.1_cds_XP_749883.1_96	0.392195	0.460238	0.315169	0.366429
lcl|NC_007194.1_cds_XP_749884.1_97	0.360646	0.465578	0.271368	0.323499
lcl|NC_007194.1_cds_XP_749885.2_98	0.354329	0.39414	0.285066	0.336284
lcl|NC_007194.1_cds_XP_749886.1_99	0.396857	0.551108	0.293446	0.351126
lcl|NC_007194.1_cds_XP_749887.1_100	0.390681	0.478587	0.298427	0.358025
lcl|NC_007194.1_cds_XP_749888.1_101	0.369953	0.499492	0.282954	0.340947
lcl|NC_007194.1_cds_XP_749889.1_102	0.334858	0.39527	0.263606	0.306727
lcl|NC_007194.1_cds_XP_749890.1_103	0.373275	0.472364	0.312683	0.37258
lcl|NC_007194.1_cds_XP_749891.1_104	0.36253	0.440828	0.292874	0.342742
lcl|NC_007194.1_cds_XP_749892.1_105	0.398073	0.507726	0.31346	0.368396
lcl|NC_007194.1_cds_XP_749893.2_106	0.395455	0.484946	0.311038	0.363892
lcl|NC_007194.1_cds_XP_749894.1_107	0.353658	0.408365	0.289156	0.3425
lcl|NC_007194.1_cds_XP_749895.1_108	0.376283	0.445607	0.288776	0.343942
lcl|NC_007194.1_cds_XP_749896.1_109	0.50066	0.660843	0.390324	0.450653
lcl|NC_007194.1_cds_XP_749897.1_110	0.354035	0.4195	0.275843	0.319437
lcl|NC_007194.1_cds_XP_749899.1_111	0.422859	0.558614	0.327049	0.38301
lcl|NC_007194.1_cds_XP_749900.1_112	0.393259	0.535751	0.285154	0.335952
lcl|NC_007194.1_cds_XP_749901.2_113	0.454428	0.613896	0.355045	0.425952
lcl|NC_007194.1_cds_XP_749903.1_114	0.43392	0.585468	0.309106	0.383393
lcl|NC_007194.1_cds_XP_749904.1_115	0.44586	0.611887	0.339099	0.407913
lcl|NC_007194.1_cds_XP_749905.1_116	0.391497	0.526881	0.284634	0.340949
lcl|NC_007194.1_cds_XP_749906.1_117	0.40839	0.54473	0.31418	0.37054
lcl|NC_007194.1_cds_XP_749907.1_118	0.391303	0.485291	0.299024	0.353864
lcl|NC_007194.1_cds_XP_749908.1_119	0.339751	0.451774	0.257004	0.292566
lcl|NC_007194.1_cds_XP_749909.1_120	0.373032	0.47817	0.285169	0.343118
lcl|NC_007194.1_cds_XP_749910.1_121	0.377631	0.469058	0.297886	0.359626
lcl|NC_007194.1_cds_XP_749911.1_122	0.407051	0.582886	0.296547	0.354908
lcl|NC_007194.1_cds_XP_749912.1_123	0.336209	0.414532	0.25798	0.305008
lcl|NC_007194.1_cds_XP_749913.1_124	0.421988	0.551519	0.322882	0.391141
lcl|NC_007194.1_cds_XP_749914.1_125	0.411711	0.53585	0.308522	0.372558
lcl|NC_007194.1_cds_XP_749915.1_126	0.345548	0.459477	0.261142	0.309963
lcl|NC_007194.1_cds_XP_749916.1_127	0.403692	0.518415	0.298091	0.359975
lcl|NC_007194.1_cds_XP_749917.1_128	0.39762	0.516714	0.294877	0.35962
lcl|NC_007194.1_cds_XP_749918.1_129	0.426683	0.588021	0.307264	0.38295
lcl|NC_007194.1_cds_XP_749919.1_130	0.477687	0.680569	0.360131	0.427356
lcl|NC_007194.1_cds_XP_749920.1_131	0.406746	0.493141	0.316858	0.371083
lcl|NC_007194.1_cds_XP_749921.1_132	0.322446	0.385305	0.264734	0.33113
lcl|NC_007194.1_cds_XP_749922.1_133	0.380673	0.487277	0.29246	0.345999
lcl|NC_007194.1_cds_XP_749923.1_134	0.402939	0.51074	0.315704	0.37897
lcl|NC_007194.1_cds_XP_749924.1_135	0.464459	0.575441	0.367846	0.426994
lcl|NC_007194.1_cds_XP_749925.1_136	0.407152	0.516923	0.314655	0.36827
lcl|NC_007194.1_cds_XP_749926.1_137	0.362965	0.453019	0.287794	0.335487
lcl|NC_007194.1_cds_XP_749927.1_138	0.386227	0.461895	0.291566	0.343598
lcl|NC_007194.1_cds_XP_749928.1_139	0.399089	0.495056	0.310109	0.365211
lcl|NC_007194.1_cds_XP_749929.1_140	0.390433	0.503432	0.284681	0.351459
lcl|NC_007194.1_cds_XP_749930.2_141	0.39966	0.488779	0.320112	0.378787
lcl|NC_007194.1_cds_XP_749932.1_142	0.360727	0.436897	0.289174	0.336586
lcl|NC_007194.1_cds_XP_749933.2_143	0.357099	0.421646	0.265579	0.32427
lcl|NC_007194.1_cds_XP_749935.2_144	0.345446	0.39214	0.277733	0.327889
lcl|NC_007194.1_cds_XP_749936.2_145	0.344991	0.408923	0.269981	0.322291
lcl|NC_007194.1_cds_XP_749937.1_146	0.392137	0.477471	0.312646	0.36752
lcl|NC_007194.1_cds_XP_749938.1_147	0.384195	0.440064	0.29775	0.354426
lcl|NC_007194.1_cds_XP_749940.1_148	0.391218	0.478977	0.303255	0.363331
lcl|NC_007194.1_cds_XP_749941.1_149	0.32542	0.395724	0.251832	0.301364
lcl|NC_007194.1_cds_XP_749942.1_150	0.357576	0.435736	0.284356	0.333573
lcl|NC_007194.1_cds_XP_749943.1_151	0.365625	0.453869	0.284289	0.331016
lcl|NC_007194.1_cds_XP_749944.1_152	0.350242	0.393707	0.289002	0.340028
lcl|NC_007194.1_cds_XP_749945.1_153	0.4211	0.496158	0.335227	0.396268
lcl|NC_007194.1_cds_XP_749946.1_154	0.348629	0.415043	0.278444	0.324546
lcl|NC_007194.1_cds_XP_749947.1_155	0.393013	0.475765	0.309436	0.373276
lcl|NC_007194.1_cds_XP_749948.1_156	0.390554	0.517774	0.290118	0.354384
lcl|NC_007194.1_cds_XP_749949.1_157	0.377181	0.440468	0.305889	0.353972
lcl|NC_007194.1_cds_XP_749950.2_158	0.359536	0.393901	0.289918	0.337228
lcl|NC_007194.1_cds_XP_749951.1_159	0.379992	0.455228	0.304916	0.36003
lcl|NC_007194.1_cds_XP_749952.2_160	0.385947	0.426402	0.32102	0.367979
lcl|NC_007194.1_cds_XP_749953.1_161	0.462008	0.579704	0.374305	0.430158
lcl|NC_007194.1_cds_XP_749954.1_162	0.329179	0.386845	0.245164	0.305637
lcl|NC_007194.1_cds_XP_749955.2_163	0.36144	0.418988	0.283089	0.331901
lcl|NC_007194.1_cds_XP_749956.2_164	0.326046	0.397206	0.244068	0.287403
lcl|NC_007194.1_cds_XP_749957.1_165	0.511262	0.702377	0.40417	0.471767
lcl|NC_007194.1_cds_XP_749958.1_166	0.356216	0.43103	0.271687	0.320619
lcl|NC_007194.1_cds_XP_749959.2_167	0.399202	0.426938	0.329557	0.382085
lcl|NC_007194.1_cds_XP_749960.1_168	0.334897	0.375668	0.267741	0.317556
lcl|NC_007194.1_cds_XP_749961.2_169	0.452126	0.552446	0.366894	0.430588
lcl|NC_007194.1_cds_XP_749962.1_170	0.348592	0.404025	0.282384	0.331531
lcl|NC_007194.1_cds_XP_749963.1_171	0.361556	0.420003	0.286106	0.335213
lcl|NC_007194.1_cds_XP_749964.1_172	0.361105	0.430773	0.285719	0.340086
lcl|NC_007194.1_cds_XP_749965.1_173	0.41238	0.51552	0.324891	0.380476
lcl|NC_007194.1_cds_XP_749966.1_174	0.364155	0.431339	0.285154	0.339281
lcl|NC_007194.1_cds_XP_749967.1_175	0.343201	0.386742	0.271144	0.316738
lcl|NC_007194.1_cds_XP_749968.1_176	0.322558	0.373847	0.253469	0.301991
lcl|NC_007194.1_cds_XP_749969.1_177	0.451043	0.559315	0.358744	0.417799
lcl|NC_007194.1_cds_XP_749970.1_178	0.377575	0.459747	0.296811	0.353401
lcl|NC_007194.1_cds_XP_749971.1_179	0.429642	0.514411	0.351982	0.414239
lcl|NC_007194.1_cds_XP_749972.1_180	0.351365	0.418666	0.282912	0.349055
lcl|NC_007194.1_cds_XP_749973.1_181	0.391547	0.457906	0.322665	0.365627
lcl|NC_007194.1_cds_XP_749974.1_182	0.363711	0.409203	0.29321	0.342762
lcl|NC_007194.1_cds_XP_749975.1_183	0.389824	0.438707	0.320439	0.367296
lcl|NC_007194.1_cds_XP_749977.1_186	0.351178	0.396583	0.275723	0.325746
lcl|NC_007194.1_cds_XP_749978.1_187	0.347972	0.39621	0.282616	0.335218
lcl|NC_007194.1_cds_XP_749979.1_188	0.441632	0.590928	0.360311	0.419752
lcl|NC_007194.1_cds_XP_749980.1_189	0.395306	0.448187	0.333044	0.374329
lcl|NC_007194.1_cds_XP_749981.1_190	0.451845	0.538214	0.361995	0.421406
lcl|NC_007194.1_cds_XP_749982.1_191	0.416616	0.509266	0.31865	0.39156
lcl|NC_007194.1_cds_XP_749983.2_192	0.344974	0.450213	0.260107	0.304836
lcl|NC_007194.1_cds_XP_749984.1_193	0.419448	0.55164	0.335682	0.388838
lcl|NC_007194.1_cds_XP_749985.2_194	0.346414	0.407195	0.270649	0.320676
lcl|NC_007194.1_cds_XP_749986.1_195	0.378876	0.445736	0.298685	0.347632
lcl|NC_007194.1_cds_XP_749987.1_196	0.433968	0.543286	0.341686	0.395813
lcl|NC_007194.1_cds_XP_749988.1_197	0.446073	0.560136	0.34439	0.402015
lcl|NC_007194.1_cds_XP_749989.1_198	0.332474	0.391875	0.262028	0.30587
lcl|NC_007194.1_cds_XP_749990.1_199	0.335517	0.365702	0.270551	0.310771
lcl|NC_007194.1_cds_XP_749991.1_200	0.433877	0.473214	0.349436	0.407731
lcl|NC_007194.1_cds_XP_749992.1_201	0.381905	0.406051	0.314552	0.366835
lcl|NC_007194.1_cds_XP_749993.1_202	0.362899	0.40976	0.280286	0.335956
lcl|NC_007194.1_cds_XP_749994.1_203	0.346396	0.426802	0.269972	0.320192
lcl|NC_007194.1_cds_XP_749995.1_204	0.369359	0.440945	0.291604	0.339741
lcl|NC_007194.1_cds_XP_749996.1_205	0.413078	0.507105	0.333911	0.393735
lcl|NC_007194.1_cds_XP_749997.1_206	0.385129	0.442802	0.304704	0.356916
lcl|NC_007194.1_cds_XP_749999.1_207	0.321151	0.377626	0.251521	0.294276
lcl|NC_007194.1_cds_XP_750000.2_208	0.39142	0.502791	0.288205	0.342905
lcl|NC_007194.1_cds_XP_750001.1_209	0.396866	0.495846	0.324213	0.373449
lcl|NC_007194.1_cds_XP_750002.1_210	0.359003	0.411955	0.283745	0.348296
lcl|NC_007194.1_cds_XP_750003.1_211	0.432705	0.597672	0.319996	0.373268
lcl|NC_007194.1_cds_XP_750004.1_212	0.393265	0.433174	0.31558	0.3676
lcl|NC_007194.1_cds_XP_750005.1_213	0.531197	0.783541	0.428931	0.493365
lcl|NC_007194.1_cds_XP_750006.1_214	0.363219	0.457795	0.274414	0.323882
lcl|NC_007194.1_cds_XP_750007.1_215	0.440743	0.560047	0.346969	0.408865
lcl|NC_007194.1_cds_XP_750008.1_216	0.376099	0.495959	0.293506	0.344526
lcl|NC_007194.1_cds_XP_750009.1_217	0.385593	0.493913	0.295863	0.351663
lcl|NC_007194.1_cds_XP_750010.1_218	0.369501	0.449299	0.285697	0.334322
lcl|NC_007194.1_cds_XP_750011.2_219	0.359265	0.391156	0.296861	0.343487
lcl|NC_007194.1_cds_XP_750012.1_220	0.403455	0.483689	0.325795	0.376533
lcl|NC_007194.1_cds_XP_750013.1_221	0.446048	0.561019	0.360185	0.41876
lcl|NC_007194.1_cds_XP_750014.1_222	0.341718	0.404215	0.263969	0.310809
lcl|NC_007194.1_cds_XP_750015.1_223	0.436485	0.519942	0.361494	0.416007
lcl|NC_007194.1_cds_XP_750016.2_224	0.327381	0.375764	0.254041	0.296848
lcl|NC_007194.1_cds_XP_750017.1_225	0.388222	0.450454	0.314219	0.366949
lcl|NC_007194.1_cds_XP_750018.1_226	0.407326	0.503907	0.325886	0.379353
lcl|NC_007194.1_cds_XP_750020.1_227	0.343038	0.395195	0.26992	0.311295
lcl|NC_007194.1_cds_XP_750021.1_228	0.35637	0.402898	0.280331	0.33294
lcl|NC_007194.1_cds_XP_750022.1_229	0.419348	0.621548	0.313974	0.376979
lcl|NC_007194.1_cds_XP_750023.1_230	0.443375	0.534975	0.348468	0.424927
lcl|NC_007194.1_cds_XP_750024.1_231	0.369601	0.459791	0.28782	0.339695
lcl|NC_007194.1_cds_XP_750025.1_232	0.363935	0.393238	0.297381	0.350323
lcl|NC_007194.1_cds_XP_750026.1_233	0.37139	0.440608	0.295484	0.346431
lcl|NC_007194.1_cds_XP_750027.2_234	0.408673	0.53562	0.323598	0.378266
lcl|NC_007194.1_cds_XP_750028.1_235	0.493854	0.679062	0.373118	0.433981
lcl|NC_007194.1_cds_XP_750029.2_236	0.347869	0.444122	0.2641	0.324016
lcl|NC_007194.1_cds_XP_750031.1_237	0.341008	0.438249	0.262781	0.311467
lcl|NC_007194.1_cds_XP_750032.1_238	0.545894	0.771085	0.435887	0.507114
lcl|NC_007194.1_cds_XP_750033.1_239	0.359703	0.468111	0.274782	0.324094
lcl|NC_007194.1_cds_XP_750034.1_240	0.358054	0.391139	0.291521	0.345393
lcl|NC_007194.1_cds_XP_750035.1_241	0.361888	0.446882	0.289328	0.339563
lcl|NC_007194.1_cds_XP_750036.1_242	0.367093	0.499229	0.284621	0.328319
lcl|NC_007194.1_cds_XP_750037.1_243	0.322713	0.376377	0.251023	0.296913
lcl|NC_007194.1_cds_XP_750038.1_244	0.40276	0.535145	0.302261	0.352704
lcl|NC_007194.1_cds_XP_750039.1_245	0.402504	0.485625	0.305076	0.360334
lcl|NC_007194.1_cds_XP_750040.1_246	0.398785	0.528299	0.293114	0.348014
lcl|NC_007194.1_cds_XP_750041.1_247	0.381386	0.565511	0.282098	0.335171
lcl|NC_007194.1_cds_XP_750042.1_248	0.369426	0.454399	0.286267	0.335967
lcl|NC_007194.1_cds_XP_750043.1_249	0.346722	0.363315	0.282277	0.343542
lcl|NC_007194.1_cds_XP_750044.1_250	0.367555	0.45261	0.281089	0.331033
lcl|NC_007194.1_cds_XP_750045.2_251	0.373718	0.471355	0.290938	0.339163
lcl|NC_007194.1_cds_XP_750046.2_252	0.348368	0.418243	0.290989	0.340157
lcl|NC_007194.1_cds_XP_750047.1_253	0.416061	0.515263	0.312797	0.37746
lcl|NC_007194.1_cds_XP_750049.1_256	0.367287	0.446565	0.290187	0.350928
lcl|NC_007194.1_cds_XP_750050.1_257	0.39794	0.530239	0.29918	0.359847
lcl|NC_007194.1_cds_XP_750051.1_258	0.38414	0.447705	0.312759	0.364862
lcl|NC_007194.1_cds_XP_750052.1_259	0.373065	0.439184	0.284927	0.332568
lcl|NC_007194.1_cds_XP_750053.1_260	0.354365	0.412508	0.285235	0.338783
lcl|NC_007194.1_cds_XP_750055.1_263	0.368417	0.414532	0.299684	0.35254
lcl|NC_007194.1_cds_XP_750056.1_264	0.414193	0.528225	0.32037	0.382287
lcl|NC_007194.1_cds_XP_750057.1_265	0.408947	0.480735	0.335921	0.39107
lcl|NC_007194.1_cds_XP_750058.1_266	0.374762	0.477839	0.285294	0.338285
lcl|NC_007194.1_cds_XP_750059.1_267	0.435744	0.567747	0.338759	0.393207
lcl|NC_007194.1_cds_XP_750060.1_268	0.539264	0.68345	0.440212	0.501886
lcl|NC_007194.1_cds_XP_750061.1_269	0.566285	0.798314	0.473476	0.523048
lcl|NC_007194.1_cds_XP_750062.1_270	0.370267	0.46766	0.274341	0.327397
lcl|NC_007194.1_cds_XP_750063.1_271	0.381815	0.436199	0.303562	0.355593
lcl|NC_007194.1_cds_XP_750064.1_272	0.403294	0.504763	0.316267	0.373234
lcl|NC_007194.1_cds_XP_750065.1_273	0.372307	0.452476	0.297463	0.351459
lcl|NC_007194.1_cds_XP_750066.1_274	0.296485	0.337325	0.223085	0.261739
lcl|NC_007194.1_cds_XP_750067.1_275	0.396876	0.499914	0.306431	0.371173
lcl|NC_007194.1_cds_XP_750068.1_276	0.344827	0.446578	0.275394	0.318454
lcl|NC_007194.1_cds_XP_750069.1_277	0.368323	0.421751	0.28246	0.343222
lcl|NC_007194.1_cds_XP_750070.2_278	0.310003	0.379735	0.2482	0.275781
lcl|NC_007194.1_cds_XP_750071.1_279	0.397805	0.524522	0.313929	0.36181
lcl|NC_007194.1_cds_XP_750072.1_280	0.431339	0.42216	0.355538	0.402735
lcl|NC_007194.1_cds_XP_750073.1_281	0.352694	0.432701	0.275582	0.323364
lcl|NC_007194.1_cds_XP_750074.1_282	0.352592	0.38466	0.288216	0.33674
lcl|NC_007194.1_cds_XP_750075.1_283	0.371981	0.446285	0.288509	0.34256
lcl|NC_007194.1_cds_XP_750076.1_284	0.335017	0.390404	0.25737	0.305029
lcl|NC_007194.1_cds_XP_750077.1_285	0.398021	0.460289	0.317268	0.377084
lcl|NC_007194.1_cds_XP_750078.1_286	0.389234	0.459265	0.309283	0.360227
lcl|NC_007194.1_cds_XP_750079.1_287	0.364348	0.391137	0.29482	0.360142
lcl|NC_007194.1_cds_XP_750080.1_288	0.359969	0.431442	0.286179	0.340136
lcl|NC_007194.1_cds_XP_750081.1_289	0.395804	0.519858	0.306116	0.348545
lcl|NC_007194.1_cds_XP_750082.1_290	0.342273	0.359252	0.277631	0.324845
lcl|NC_007194.1_cds_XP_750086.2_292	0.327138	0.38141	0.249766	0.297856
lcl|NC_007194.1_cds_XP_750087.1_293	0.365001	0.434446	0.291482	0.343211
lcl|NC_007194.1_cds_XP_750088.1_294	0.363444	0.433233	0.284172	0.3416
lcl|NC_007194.1_cds_XP_750089.2_295	0.523968	0.681355	0.415982	0.491088
lcl|NC_007194.1_cds_XP_750090.2_296	0.416504	0.517001	0.338261	0.394834
lcl|NC_007194.1_cds_XP_750091.2_297	0.370596	0.450635	0.301167	0.352895
lcl|NC_007194.1_cds_XP_750092.1_298	0.378568	0.450263	0.295242	0.342149
lcl|NC_007194.1_cds_XP_750093.1_299	0.384573	0.457697	0.305599	0.357763
lcl|NC_007194.1_cds_XP_750094.1_300	0.403496	0.447221	0.323341	0.375482
lcl|NC_007194.1_cds_XP_750095.1_301	0.341924	0.395991	0.270982	0.319171
lcl|NC_007194.1_cds_XP_750096.1_302	0.343568	0.381326	0.279516	0.329651
lcl|NC_007194.1_cds_XP_750097.1_303	0.348978	0.423742	0.270232	0.321608
lcl|NC_007194.1_cds_XP_750098.1_304	0.353812	0.416735	0.284495	0.326226
lcl|NC_007194.1_cds_XP_750099.2_305	0.385207	0.473839	0.31033	0.359116
lcl|NC_007194.1_cds_XP_750100.1_306	0.417707	0.486273	0.343743	0.398279
lcl|NC_007194.1_cds_XP_750101.2_307	0.550182	0.706392	0.446985	0.506353
lcl|NC_007194.1_cds_XP_750102.1_308	0.407126	0.494073	0.335457	0.393327
lcl|NC_007194.1_cds_XP_750103.2_309	0.42072	0.498485	0.334694	0.391385
lcl|NC_007194.1_cds_XP_750104.1_310	0.376232	0.420931	0.306564	0.361819
lcl|NC_007194.1_cds_XP_750105.1_311	0.391752	0.46346	0.304536	0.365674
lcl|NC_007194.1_cds_XP_750106.1_312	0.35856	0.403712	0.289724	0.333321
lcl|NC_007194.1_cds_XP_750107.1_313	0.410854	0.526326	0.330932	0.388364
lcl|NC_007194.1_cds_XP_750108.1_314	0.367598	0.427948	0.291792	0.347154
lcl|NC_007194.1_cds_XP_750109.1_315	0.371994	0.434908	0.293724	0.340107
lcl|NC_007194.1_cds_XP_750110.1_316	0.399141	0.491802	0.32242	0.375775
lcl|NC_007194.1_cds_XP_750111.1_317	0.447319	0.562463	0.355561	0.410717
lcl|NC_007194.1_cds_XP_750112.1_318	0.416869	0.500361	0.32946	0.384127
lcl|NC_007194.1_cds_XP_750113.1_319	0.517651	0.699529	0.402319	0.46225
lcl|NC_007194.1_cds_XP_750114.1_320	0.403057	0.440023	0.290112	0.342555
lcl|NC_007194.1_cds_XP_750115.1_321	0.381778	0.481797	0.306222	0.357107
lcl|NC_007194.1_cds_XP_750116.1_322	0.379242	0.496829	0.294288	0.34236
lcl|NC_007194.1_cds_XP_750117.1_323	0.345867	0.426066	0.266363	0.312346
lcl|NC_007194.1_cds_XP_750118.1_324	0.399742	0.425047	0.323092	0.371054
lcl|NC_007194.1_cds_XP_750119.1_325	0.385196	0.388926	0.318341	0.36415
lcl|NC_007194.1_cds_XP_750120.1_326	0.379355	0.430043	0.306382	0.357682
lcl|NC_007194.1_cds_XP_750121.1_327	0.366827	0.390005	0.300463	0.351492
lcl|NC_007194.1_cds_XP_750122.1_328	0.363816	0.494406	0.254136	0.308329
lcl|NC_007194.1_cds_XP_750123.1_329	0.394648	0.478806	0.308377	0.368346
lcl|NC_007194.1_cds_XP_750124.2_330	0.375222	0.471147	0.294582	0.35536
lcl|NC_007194.1_cds_XP_750125.1_331	0.369106	0.419342	0.299815	0.351128
lcl|NC_007194.1_cds_XP_750126.1_332	0.384228	0.435719	0.30293	0.352348
lcl|NC_007194.1_cds_XP_750127.1_333	0.36371	0.404508	0.301712	0.357988
lcl|NC_007194.1_cds_XP_750128.1_334	0.351124	0.412426	0.280646	0.325976
lcl|NC_007194.1_cds_XP_750129.1_335	0.357936	0.416779	0.293085	0.342233
lcl|NC_007194.1_cds_XP_750130.1_336	0.358718	0.416709	0.290411	0.343346
lcl|NC_007194.1_cds_XP_750131.1_337	0.336656	0.434451	0.251967	0.308645
lcl|NC_007194.1_cds_XP_750132.1_338	0.388391	0.43573	0.316201	0.368947
lcl|NC_007194.1_cds_XP_750133.1_339	0.390609	0.435395	0.331602	0.37687
lcl|NC_007194.1_cds_XP_750134.1_340	0.411383	0.484173	0.34035	0.395198
lcl|NC_007194.1_cds_XP_750135.1_341	0.372452	0.475407	0.288426	0.33757
lcl|NC_007194.1_cds_XP_750137.1_342	0.324154	0.365431	0.256501	0.29835
lcl|NC_007194.1_cds_XP_750138.1_343	0.329825	0.38982	0.25258	0.300023
lcl|NC_007194.1_cds_XP_750139.1_344	0.375523	0.4465	0.295841	0.346792
lcl|NC_007194.1_cds_XP_750141.2_345	0.384488	0.50826	0.295627	0.343547
lcl|NC_007194.1_cds_XP_750142.2_346	0.398112	0.446232	0.325696	0.377359
lcl|NC_007194.1_cds_XP_750143.1_347	0.362297	0.403095	0.295039	0.346316
lcl|NC_007194.1_cds_XP_750144.1_348	0.373208	0.424981	0.303574	0.354076
lcl|NC_007194.1_cds_XP_750145.1_349	0.44798	0.581224	0.364155	0.416366
lcl|NC_007194.1_cds_XP_750146.1_350	0.392597	0.459592	0.297955	0.355472
lcl|NC_007194.1_cds_XP_750147.1_351	0.490252	0.580581	0.400538	0.455486
lcl|NC_007194.1_cds_XP_750150.1_353	0.329086	0.379108	0.260272	0.302416
lcl|NC_007194.1_cds_XP_750151.1_354	0.385381	0.522103	0.301913	0.357133
lcl|NC_007194.1_cds_XP_750156.1_357	0.482808	0.673814	0.385431	0.447067
lcl|NC_007194.1_cds_XP_750157.2_358	0.365736	0.415557	0.2978	0.350338
lcl|NC_007194.1_cds_XP_750158.2_359	0.421378	0.545707	0.308737	0.373091
lcl|NC_007194.1_cds_XP_750159.1_360	0.369692	0.492984	0.289431	0.347026
lcl|NC_007194.1_cds_XP_750160.2_361	0.35168	0.409527	0.280147	0.330667
lcl|NC_007194.1_cds_XP_750161.1_362	0.49392	0.676926	0.38482	0.453906
lcl|NC_007194.1_cds_XP_750162.2_363	0.450594	0.592278	0.345934	0.414294
lcl|NC_007194.1_cds_XP_750163.2_364	0.332274	0.384309	0.277406	0.322727
lcl|NC_007194.1_cds_XP_750164.1_365	0.389992	0.428101	0.31379	0.361624
lcl|NC_007194.1_cds_XP_750165.1_366	0.391943	0.49024	0.301626	0.360949
lcl|NC_007194.1_cds_XP_750166.1_367	0.382725	0.506582	0.296942	0.348758
lcl|NC_007194.1_cds_XP_750167.1_368	0.566668	0.757251	0.459497	0.5282
lcl|NC_007194.1_cds_XP_750168.1_369	0.36402	0.426247	0.285005	0.334873
lcl|NC_007194.1_cds_XP_750169.1_370	0.338664	0.379497	0.271193	0.321654
lcl|NC_007194.1_cds_XP_750170.1_371	0.40805	0.478293	0.332694	0.391164
lcl|NC_007194.1_cds_XP_750171.1_372	0.39312	0.447297	0.318716	0.368585
lcl|NC_007194.1_cds_XP_750172.1_373	0.336668	0.463538	0.266487	0.314047
lcl|NC_007194.1_cds_XP_750173.1_374	0.364399	0.432054	0.291479	0.34399
lcl|NC_007194.1_cds_XP_750174.2_375	0.417918	0.538646	0.326959	0.38523
lcl|NC_007194.1_cds_XP_750175.2_376	0.425376	0.542106	0.341226	0.394153
lcl|NC_007194.1_cds_XP_750176.1_377	0.385568	0.474442	0.298998	0.358042
lcl|NC_007194.1_cds_XP_750177.1_378	0.387484	0.46642	0.309281	0.36112
lcl|NC_007194.1_cds_XP_750178.1_379	0.402835	0.469914	0.339119	0.392998
lcl|NC_007194.1_cds_XP_750179.1_380	0.377119	0.504919	0.26849	0.327306
lcl|NC_007194.1_cds_XP_750180.1_381	0.550606	0.797114	0.430594	0.498052
lcl|NC_007194.1_cds_XP_750181.1_382	0.360381	0.448939	0.269382	0.333655
lcl|NC_007194.1_cds_XP_750182.1_383	0.397729	0.49665	0.31371	0.369136
lcl|NC_007194.1_cds_XP_750183.1_384	0.371219	0.466678	0.285406	0.336967
lcl|NC_007194.1_cds_XP_750184.2_385	0.373901	0.433786	0.298085	0.346209
lcl|NC_007194.1_cds_XP_750185.1_386	0.427256	0.5366	0.351805	0.404675
lcl|NC_007194.1_cds_XP_750186.1_387	0.358654	0.428016	0.282167	0.335901
lcl|NC_007194.1_cds_XP_750187.2_388	0.339656	0.384377	0.26893	0.314507
lcl|NC_007194.1_cds_XP_750188.1_389	0.441037	0.582353	0.36558	0.417229
lcl|NC_007194.1_cds_XP_750189.1_390	0.33863	0.363366	0.268142	0.309304
lcl|NC_007194.1_cds_XP_750190.1_391	0.352977	0.404214	0.285433	0.328874
lcl|NC_007194.1_cds_XP_750191.1_392	0.342222	0.383705	0.268966	0.307872
lcl|NC_007194.1_cds_XP_750192.1_393	0.380084	0.480841	0.292407	0.3424
lcl|NC_007194.1_cds_XP_750193.1_394	0.390028	0.478813	0.313948	0.363862
lcl|NC_007194.1_cds_XP_750194.2_396	0.373908	0.448445	0.298858	0.348311
lcl|NC_007194.1_cds_XP_750195.1_397	0.534189	0.704612	0.442031	0.494729
lcl|NC_007194.1_cds_XP_750196.1_398	0.352729	0.401453	0.282143	0.330743
lcl|NC_007194.1_cds_XP_750199.2_400	0.397847	0.507442	0.315703	0.362071
lcl|NC_007194.1_cds_XP_750200.1_401	0.363894	0.433672	0.285539	0.334715
lcl|NC_007194.1_cds_XP_750201.1_402	0.560937	0.822308	0.436671	0.499134
lcl|NC_007194.1_cds_XP_750202.1_403	0.517399	0.723328	0.414523	0.474102
lcl|NC_007194.1_cds_XP_750203.1_404	0.503049	0.634151	0.399609	0.467285
lcl|NC_007194.1_cds_XP_750204.1_405	0.454532	0.604851	0.350204	0.414526
lcl|NC_007194.1_cds_XP_750205.1_406	0.373785	0.465162	0.293463	0.340239
lcl|NC_007194.1_cds_XP_750206.1_407	0.390682	0.448783	0.317651	0.362586
lcl|NC_007194.1_cds_XP_750207.1_408	0.391309	0.534934	0.301885	0.355868
lcl|NC_007194.1_cds_XP_750208.1_409	0.460438	0.565542	0.372009	0.430104
lcl|NC_007194.1_cds_XP_750209.1_410	0.314401	0.395259	0.232986	0.2814
lcl|NC_007194.1_cds_XP_750210.1_411	0.376663	0.462146	0.285332	0.348558
lcl|NC_007194.1_cds_XP_750211.1_412	0.515269	0.732733	0.416384	0.487384
lcl|NC_007194.1_cds_XP_750212.1_413	0.326618	0.377553	0.256414	0.305883
lcl|NC_007194.1_cds_XP_750213.1_414	0.334257	0.399519	0.260669	0.313109
lcl|NC_007194.1_cds_XP_750215.1_415	0.514575	0.698713	0.424459	0.479284
lcl|NC_007194.1_cds_XP_750216.1_416	0.390025	0.446912	0.323235	0.383252
lcl|NC_007194.1_cds_XP_750217.1_417	0.400093	0.466847	0.314065	0.36544
lcl|NC_007194.1_cds_XP_750218.1_418	0.342844	0.434193	0.267002	0.312558
lcl|NC_007194.1_cds_XP_750219.2_419	0.359629	0.432813	0.285974	0.335258
lcl|NC_007194.1_cds_XP_750220.1_420	0.392961	0.509941	0.300151	0.355891
lcl|NC_007194.1_cds_XP_750221.1_421	0.486383	0.696951	0.391821	0.454039
lcl|NC_007194.1_cds_XP_750222.1_422	0.465014	0.684646	0.36987	0.424547
lcl|NC_007194.1_cds_XP_750223.1_423	0.350526	0.407484	0.265661	0.314325
lcl|NC_007194.1_cds_XP_750224.1_424	0.43686	0.55855	0.354825	0.406038
lcl|NC_007194.1_cds_XP_750225.1_425	0.420121	0.570121	0.317391	0.380157
lcl|NC_007194.1_cds_XP_750226.1_426	0.375789	0.456872	0.295825	0.349524
lcl|NC_007194.1_cds_XP_750227.1_427	0.376621	0.451609	0.293127	0.343575
lcl|NC_007194.1_cds_XP_750228.1_428	0.366832	0.433257	0.293288	0.342092
lcl|NC_007194.1_cds_XP_750229.1_429	0.37276	0.487695	0.280752	0.33674
lcl|NC_007194.1_cds_XP_750230.1_430	0.361517	0.491924	0.257596	0.308342
lcl|NC_007194.1_cds_XP_750231.1_431	0.516415	0.736308	0.420156	0.47886
lcl|NC_007194.1_cds_XP_750232.1_432	0.364808	0.456726	0.293865	0.347502
lcl|NC_007194.1_cds_XP_750233.1_433	0.365946	0.403062	0.295804	0.343997
lcl|NC_007194.1_cds_XP_750234.2_434	0.430056	0.51897	0.357142	0.408788
lcl|NC_007194.1_cds_XP_750235.2_435	0.347495	0.417903	0.290319	0.340925
lcl|NC_007194.1_cds_XP_750236.2_436	0.392766	0.449428	0.314303	0.365305
lcl|NC_007194.1_cds_XP_750237.1_437	0.381878	0.467303	0.293623	0.341582
lcl|NC_007194.1_cds_XP_750238.1_438	0.494723	0.617054	0.398388	0.46446
lcl|NC_007194.1_cds_XP_750239.1_439	0.428448	0.56688	0.332963	0.37802
lcl|NC_007194.1_cds_XP_750240.1_440	0.358529	0.420363	0.282617	0.328195
lcl|NC_007194.1_cds_XP_750241.1_441	0.319869	0.360971	0.256871	0.300245
lcl|NC_007194.1_cds_XP_750242.1_442	0.397942	0.476652	0.31918	0.370814
lcl|NC_007194.1_cds_XP_750243.1_443	0.443426	0.629019	0.335455	0.396775
lcl|NC_007194.1_cds_XP_750244.1_444	0.410013	0.525398	0.340146	0.395727
lcl|NC_007194.1_cds_XP_750245.1_445	0.361193	0.443793	0.288631	0.334452
lcl|NC_007194.1_cds_XP_750246.1_446	0.364911	0.445795	0.285479	0.339059
lcl|NC_007194.1_cds_XP_750247.1_447	0.385533	0.457492	0.307751	0.362962
lcl|NC_007194.1_cds_XP_750248.2_448	0.409345	0.521217	0.314417	0.370544
lcl|NC_007194.1_cds_XP_750249.1_449	0.362873	0.438511	0.248521	0.313383
lcl|NC_007194.1_cds_XP_750250.1_450	0.376524	0.461421	0.285906	0.340352
lcl|NC_007194.1_cds_XP_750251.1_451	0.424433	0.558938	0.329578	0.391208
lcl|NC_007194.1_cds_XP_750253.1_452	0.4834	0.623931	0.398074	0.467943
lcl|NC_007194.1_cds_XP_750254.1_453	0.46084	0.543923	0.370342	0.43004
lcl|NC_007194.1_cds_XP_750255.1_454	0.44296	0.542324	0.36385	0.419838
lcl|NC_007194.1_cds_XP_750256.1_455	0.371206	0.413193	0.303313	0.356153
lcl|NC_007194.1_cds_XP_750257.1_456	0.573452	0.770899	0.46158	0.525749
lcl|NC_007194.1_cds_XP_750259.1_457	0.393074	0.4942	0.302059	0.361455
lcl|NC_007194.1_cds_XP_750260.1_458	0.379659	0.433504	0.301052	0.357234
lcl|NC_007194.1_cds_XP_750261.1_459	0.451904	0.622092	0.36434	0.413499
lcl|NC_007194.1_cds_XP_750262.1_460	0.369057	0.440458	0.293113	0.345495
lcl|NC_007194.1_cds_XP_750263.1_461	0.390915	0.498752	0.30871	0.359978
lcl|NC_007194.1_cds_XP_750264.1_462	0.373652	0.502545	0.289516	0.348355
lcl|NC_007194.1_cds_XP_750265.1_463	0.409645	0.491808	0.325687	0.391493
lcl|NC_007194.1_cds_XP_750266.1_464	0.364921	0.457504	0.27963	0.33185
lcl|NC_007194.1_cds_XP_750267.1_465	0.395124	0.523256	0.306817	0.366705
lcl|NC_007194.1_cds_XP_750268.1_466	0.368489	0.46291	0.274068	0.321681
lcl|NC_007194.1_cds_XP_750269.2_467	0.533636	0.688333	0.422327	0.481434
lcl|NC_007194.1_cds_XP_750270.2_468	0.445848	0.544151	0.362889	0.430213
lcl|NC_007194.1_cds_XP_750271.1_469	0.344053	0.389931	0.263068	0.329771
lcl|NC_007194.1_cds_XP_750272.2_470	0.371761	0.463687	0.291293	0.34949
lcl|NC_007194.1_cds_XP_750273.1_471	0.365096	0.437505	0.289139	0.343362
lcl|NC_007194.1_cds_XP_750275.1_472	0.360504	0.402575	0.285127	0.33491
lcl|NC_007194.1_cds_XP_750276.1_473	0.410774	0.589079	0.300914	0.365644
lcl|NC_007194.1_cds_XP_750277.1_474	0.377895	0.450461	0.29903	0.353543
lcl|NC_007194.1_cds_XP_750278.1_475	0.463207	0.661795	0.364115	0.429255
lcl|NC_007194.1_cds_XP_750279.1_476	0.35244	0.423487	0.279024	0.330114
lcl|NC_007194.1_cds_XP_750280.1_477	0.430043	0.549835	0.341903	0.39465
lcl|NC_007194.1_cds_XP_750281.1_478	0.408323	0.528905	0.313229	0.365296
lcl|NC_007194.1_cds_XP_750282.1_479	0.354775	0.417263	0.282594	0.33547
lcl|NC_007194.1_cds_XP_750283.1_480	0.450199	0.57544	0.352189	0.413264
lcl|NC_007194.1_cds_XP_750284.1_481	0.370381	0.470167	0.266511	0.318512
lcl|NC_007194.1_cds_XP_750285.1_482	0.415179	0.504916	0.337233	0.390771
lcl|NC_007194.1_cds_XP_750286.1_483	0.402348	0.453709	0.326658	0.380092
lcl|NC_007194.1_cds_XP_750287.1_484	0.38226	0.420577	0.309456	0.348343
lcl|NC_007194.1_cds_XP_750288.1_485	0.559405	0.739791	0.45996	0.535423
lcl|NC_007194.1_cds_XP_750289.2_486	0.337018	0.321793	0.268144	0.308388
lcl|NC_007194.1_cds_XP_750290.1_487	0.425971	0.50055	0.346367	0.402012
lcl|NC_007194.1_cds_XP_750291.1_488	0.352206	0.397121	0.286677	0.334997
lcl|NC_007194.1_cds_XP_750292.1_489	0.369156	0.451028	0.287093	0.336234
lcl|NC_007194.1_cds_XP_750293.1_490	0.398378	0.468778	0.317397	0.368857
lcl|NC_007194.1_cds_XP_750294.1_491	0.397278	0.453025	0.31354	0.377086
lcl|NC_007194.1_cds_XP_750295.1_492	0.33567	0.42077	0.256344	0.299123
lcl|NC_007194.1_cds_XP_750296.1_493	0.350282	0.406606	0.279642	0.3281
lcl|NC_007194.1_cds_XP_750298.1_494	0.36521	0.409983	0.289113	0.341389
lcl|NC_007194.1_cds_XP_750299.1_495	0.579037	0.834233	0.44763	0.524872
lcl|NC_007194.1_cds_XP_750300.1_496	0.369248	0.422405	0.297798	0.354524
lcl|NC_007194.1_cds_XP_750301.1_497	0.435914	0.565248	0.337954	0.401164
lcl|NC_007194.1_cds_XP_750302.1_498	0.360125	0.410622	0.277775	0.331049
lcl|NC_007194.1_cds_XP_750303.1_499	0.333475	0.366356	0.262675	0.305934
lcl|NC_007194.1_cds_XP_750304.1_500	0.359234	0.425901	0.286748	0.331799
lcl|NC_007194.1_cds_XP_750305.1_501	0.383816	0.472086	0.299007	0.355231
lcl|NC_007194.1_cds_XP_750306.1_502	0.313282	0.383567	0.244869	0.29815
lcl|NC_007194.1_cds_XP_750307.1_503	0.346363	0.380532	0.278272	0.328819
lcl|NC_007194.1_cds_XP_750309.1_506	0.39857	0.470342	0.317382	0.379676
lcl|NC_007194.1_cds_XP_750310.1_507	0.396651	0.460047	0.315038	0.36255
lcl|NC_007194.1_cds_XP_750311.1_508	0.427615	0.545016	0.342536	0.392639
lcl|NC_007194.1_cds_XP_750312.1_509	0.582619	0.809378	0.448541	0.526291
lcl|NC_007194.1_cds_XP_750313.1_510	0.345008	0.400498	0.275609	0.326944
lcl|NC_007194.1_cds_XP_750315.1_513	0.379175	0.460374	0.300191	0.348189
lcl|NC_007194.1_cds_XP_750316.1_514	0.415869	0.552745	0.327956	0.374695
lcl|NC_007194.1_cds_XP_750317.1_515	0.364405	0.46335	0.278487	0.327053
lcl|NC_007194.1_cds_XP_750318.1_516	0.388161	0.467781	0.300223	0.353839
lcl|NC_007194.1_cds_XP_750319.1_517	0.453673	0.555711	0.352237	0.413031
lcl|NC_007194.1_cds_XP_750320.1_518	0.358064	0.446753	0.274384	0.322541
lcl|NC_007194.1_cds_XP_750321.1_519	0.404197	0.537716	0.315866	0.373166
lcl|NC_007194.1_cds_XP_750322.1_520	0.383112	0.46968	0.30799	0.367666
lcl|NC_007194.1_cds_XP_750323.1_521	0.360327	0.423209	0.285631	0.339003
lcl|NC_007194.1_cds_XP_750324.1_522	0.358359	0.429279	0.280645	0.333306
lcl|NC_007194.1_cds_XP_750325.1_523	0.337371	0.392629	0.269123	0.309213
lcl|NC_007194.1_cds_XP_750326.2_524	0.336227	0.408244	0.252816	0.293172
lcl|NC_007194.1_cds_XP_750327.1_525	0.456593	0.585349	0.372415	0.438562
lcl|NC_007194.1_cds_XP_750328.1_526	0.379658	0.48766	0.299361	0.359754
lcl|NC_007194.1_cds_XP_750329.1_527	0.553931	0.727099	0.434312	0.494123
lcl|NC_007194.1_cds_XP_750330.1_528	0.388843	0.480839	0.316341	0.36784
lcl|NC_007194.1_cds_XP_750331.1_529	0.376891	0.452929	0.291659	0.340484
lcl|NC_007194.1_cds_XP_750332.2_530	0.42095	0.547404	0.326382	0.390326
lcl|NC_007194.1_cds_XP_750333.1_531	0.404366	0.505342	0.318053	0.370072
lcl|NC_007194.1_cds_XP_750334.1_532	0.43032	0.528991	0.344443	0.399083
lcl|NC_007194.1_cds_XP_750335.1_533	0.458736	0.62597	0.354981	0.423199
lcl|NC_007194.1_cds_XP_750336.1_534	0.409851	0.549318	0.299086	0.368449
lcl|NC_007194.1_cds_XP_750337.1_535	0.382247	0.450759	0.28863	0.345027
lcl|NC_007194.1_cds_XP_750338.1_536	0.412174	0.503339	0.340808	0.402514
lcl|NC_007194.1_cds_XP_750339.1_537	0.324327	0.472845	0.249503	0.300201
lcl|NC_007194.1_cds_XP_750340.1_538	0.454281	0.592768	0.36239	0.42232
lcl|NC_007194.1_cds_XP_750341.1_539	0.36823	0.445418	0.274092	0.336935
lcl|NC_007194.1_cds_XP_750342.1_540	0.395265	0.450533	0.31296	0.365903
lcl|NC_007194.1_cds_XP_750343.1_541	0.393622	0.483168	0.308077	0.36367
lcl|NC_007194.1_cds_XP_750344.1_542	0.424648	0.533594	0.31304	0.373673
lcl|NC_007194.1_cds_XP_750345.2_543	0.461482	0.687963	0.344706	0.403148
lcl|NC_007194.1_cds_XP_750346.1_544	0.411197	0.565196	0.312875	0.376366
lcl|NC_007194.1_cds_XP_750347.1_545	0.357531	0.471475	0.274214	0.326438
lcl|NC_007194.1_cds_XP_750348.1_546	0.395165	0.465017	0.312588	0.368362
lcl|NC_007194.1_cds_XP_750349.2_547	0.540699	0.717108	0.444299	0.497085
lcl|NC_007194.1_cds_XP_750350.2_548	0.328664	0.41054	0.246476	0.290088
lcl|NC_007194.1_cds_XP_750352.1_549	0.386968	0.467861	0.308345	0.364354
lcl|NC_007194.1_cds_XP_750353.1_550	0.400406	0.489933	0.313213	0.368216
lcl|NC_007194.1_cds_XP_750354.1_551	0.356834	0.49081	0.272197	0.317323
lcl|NC_007194.1_cds_XP_750355.2_552	0.424041	0.494876	0.345134	0.398819
lcl|NC_007194.1_cds_XP_750356.1_553	0.39147	0.441445	0.31728	0.370144
lcl|NC_007194.1_cds_XP_750358.1_556	0.367819	0.430423	0.294484	0.34723
lcl|NC_007194.1_cds_XP_750359.1_557	0.401095	0.531187	0.302791	0.368664
lcl|NC_007194.1_cds_XP_750360.1_558	0.409644	0.52001	0.309135	0.37117
lcl|NC_007194.1_cds_XP_750361.1_559	0.387133	0.463449	0.32357	0.382161
lcl|NC_007194.1_cds_XP_750362.1_560	0.358355	0.408552	0.28257	0.338029
lcl|NC_007194.1_cds_XP_750363.1_561	0.33834	0.39396	0.277297	0.33077
lcl|NC_007194.1_cds_XP_750364.1_562	0.316841	0.382272	0.243245	0.2867
lcl|NC_007194.1_cds_XP_750365.2_563	0.35314	0.441783	0.276978	0.326777
lcl|NC_007194.1_cds_XP_750366.1_564	0.452702	0.54024	0.370693	0.434431
lcl|NC_007194.1_cds_XP_750367.1_565	0.34381	0.420626	0.277453	0.322259
lcl|NC_007194.1_cds_XP_750368.2_566	0.46146	0.567317	0.378309	0.439649
lcl|NC_007194.1_cds_XP_750369.1_567	0.332378	0.397047	0.260052	0.306657
lcl|NC_007194.1_cds_XP_750370.1_568	0.43549	0.499369	0.356946	0.417468
lcl|NC_007194.1_cds_XP_750371.1_569	0.360976	0.430355	0.275112	0.320418
lcl|NC_007194.1_cds_XP_750372.1_570	0.379774	0.432576	0.307363	0.354978
lcl|NC_007194.1_cds_XP_750373.1_571	0.396011	0.446854	0.311282	0.365508
lcl|NC_007194.1_cds_XP_750374.1_572	0.369698	0.411983	0.29128	0.347884
lcl|NC_007194.1_cds_XP_750375.2_573	0.328776	0.361024	0.268023	0.314319
lcl|NC_007194.1_cds_XP_750376.1_574	0.345356	0.430735	0.267346	0.312286
lcl|NC_007194.1_cds_XP_750377.1_575	0.351635	0.397973	0.274364	0.320318
lcl|NC_007194.1_cds_XP_750378.1_576	0.366486	0.433367	0.294506	0.349108
lcl|NC_007194.1_cds_XP_750379.1_577	0.386721	0.462046	0.306625	0.361842
lcl|NC_007194.1_cds_XP_750380.1_578	0.372355	0.449401	0.283117	0.328493
lcl|NC_007194.1_cds_XP_750381.1_579	0.388375	0.516396	0.295979	0.349211
lcl|NC_007194.1_cds_XP_750382.1_580	0.379564	0.430089	0.30049	0.34822
lcl|NC_007194.1_cds_XP_750383.2_581	0.467686	0.619685	0.372963	0.416874
lcl|NC_007194.1_cds_XP_750384.1_582	0.399691	0.511073	0.321224	0.366449
lcl|NC_007194.1_cds_XP_750385.1_583	0.380434	0.430758	0.290615	0.348924
lcl|NC_007194.1_cds_XP_750386.1_584	0.431208	0.5603	0.353357	0.408332
lcl|NC_007194.1_cds_XP_750387.1_585	0.379425	0.495784	0.311336	0.378296
lcl|NC_007194.1_cds_XP_750388.2_586	0.529159	0.771028	0.407869	0.474422
lcl|NC_007194.1_cds_XP_750389.1_587	0.412991	0.523481	0.326663	0.386204
lcl|NC_007194.1_cds_XP_750390.1_588	0.412491	0.507642	0.321438	0.376013
lcl|NC_007194.1_cds_XP_750391.1_589	0.478319	0.57206	0.384664	0.440114
lcl|NC_007194.1_cds_XP_750392.1_590	0.347919	0.397996	0.265298	0.316047
lcl|NC_007194.1_cds_XP_750393.1_591	0.42767	0.550585	0.336079	0.393714
lcl|NC_007194.1_cds_XP_750394.1_592	0.426458	0.539313	0.328136	0.384867
lcl|NC_007194.1_cds_XP_750395.1_593	0.470119	0.578666	0.367137	0.426609
lcl|NC_007194.1_cds_XP_750396.1_594	0.38932	0.493868	0.306886	0.367063
lcl|NC_007194.1_cds_XP_750397.1_595	0.35215	0.367396	0.278102	0.325601
lcl|NC_007194.1_cds_XP_750398.1_596	0.369406	0.476291	0.278111	0.331153
lcl|NC_007194.1_cds_XP_750399.1_597	0.347392	0.413758	0.263769	0.314535
lcl|NC_007194.1_cds_XP_750400.1_598	0.360619	0.481151	0.264617	0.318327
lcl|NC_007194.1_cds_XP_750401.1_599	0.401262	0.457886	0.322165	0.377398
lcl|NC_007194.1_cds_XP_750402.1_600	0.432492	0.588263	0.33716	0.401728
lcl|NC_007194.1_cds_XP_750403.1_601	0.358173	0.447126	0.279627	0.328497
lcl|NC_007194.1_cds_XP_750404.1_602	0.372235	0.457255	0.295986	0.347099
lcl|NC_007194.1_cds_XP_750405.1_603	0.399363	0.491326	0.324995	0.381505
lcl|NC_007194.1_cds_XP_750406.1_604	0.380998	0.430816	0.311012	0.356043
lcl|NC_007194.1_cds_XP_750407.1_605	0.439062	0.599713	0.376254	0.440977
lcl|NC_007194.1_cds_XP_750408.1_606	0.336982	0.421457	0.262257	0.313215
lcl|NC_007194.1_cds_XP_750409.1_607	0.449411	0.531001	0.366691	0.42085
lcl|NC_007194.1_cds_XP_750410.1_608	0.441746	0.561313	0.359497	0.410842
lcl|NC_007194.1_cds_XP_750411.1_609	0.454778	0.547712	0.374138	0.429613
lcl|NC_007194.1_cds_XP_750412.1_610	0.408704	0.475891	0.332932	0.393474
lcl|NC_007194.1_cds_XP_750413.1_611	0.410373	0.53787	0.311302	0.364484
lcl|NC_007194.1_cds_XP_750414.1_612	0.343928	0.393189	0.272299	0.322257
lcl|NC_007194.1_cds_XP_750415.1_613	0.343077	0.406521	0.271346	0.319949
lcl|NC_007194.1_cds_XP_750416.2_614	0.39744	0.491253	0.318646	0.371913
lcl|NC_007194.1_cds_XP_750417.1_615	0.38841	0.471555	0.306873	0.36048
lcl|NC_007194.1_cds_XP_750418.2_616	0.390539	0.457859	0.312213	0.366511
lcl|NC_007194.1_cds_XP_750419.2_617	0.415052	0.553055	0.327531	0.389205
lcl|NC_007194.1_cds_XP_750420.2_618	0.451236	0.573599	0.355754	0.421511
lcl|NC_007194.1_cds_XP_750421.1_619	0.35687	0.436912	0.280829	0.34359
lcl|NC_007194.1_cds_XP_750422.2_620	0.326837	0.383269	0.244485	0.288288
lcl|NC_007194.1_cds_XP_750423.1_621	0.375727	0.431764	0.304241	0.357379
lcl|NC_007194.1_cds_XP_750426.1_623	0.553735	0.776613	0.449431	0.502854
lcl|NC_007194.1_cds_XP_750427.1_624	0.411867	0.494772	0.330868	0.387694
lcl|NC_007194.1_cds_XP_750428.1_625	0.455363	0.584886	0.369662	0.423787
lcl|NC_007194.1_cds_XP_750429.1_626	0.422737	0.566401	0.309841	0.370136
lcl|NC_007194.1_cds_XP_750430.1_627	0.460075	0.619097	0.362903	0.425152
lcl|NC_007194.1_cds_XP_750431.1_628	0.385589	0.458256	0.311376	0.357499
lcl|NC_007194.1_cds_XP_750432.1_629	0.637129	0.798859	0.504992	0.579017
lcl|NC_007194.1_cds_XP_750433.1_630	0.391133	0.498277	0.304453	0.361344
lcl|NC_007194.1_cds_XP_750434.1_631	0.38656	0.452734	0.308104	0.365611
lcl|NC_007194.1_cds_XP_750435.1_632	0.399934	0.475804	0.319708	0.374641
lcl|NC_007194.1_cds_XP_750436.1_633	0.403539	0.43454	0.349272	0.395843
lcl|NC_007194.1_cds_XP_750437.1_634	0.366888	0.408775	0.295894	0.331812
lcl|NC_007194.1_cds_XP_750438.1_635	0.429965	0.559274	0.335589	0.391632
lcl|NC_007194.1_cds_XP_750439.1_636	0.381622	0.486197	0.302951	0.364981
lcl|NC_007194.1_cds_XP_750440.1_637	0.405349	0.562542	0.314063	0.364613
lcl|NC_007194.1_cds_XP_750441.1_638	0.377439	0.449279	0.297714	0.352192
lcl|NC_007194.1_cds_XP_750442.1_639	0.368733	0.415565	0.29846	0.34867
lcl|NC_007194.1_cds_XP_750443.1_640	0.47731	0.657156	0.364812	0.427128
lcl|NC_007194.1_cds_XP_750444.1_641	0.352612	0.430907	0.277411	0.32811
lcl|NC_007194.1_cds_XP_750445.1_642	0.523397	0.733041	0.416982	0.492247
lcl|NC_007194.1_cds_XP_750446.1_643	0.389751	0.477931	0.300584	0.358161
lcl|NC_007194.1_cds_XP_750447.1_644	0.432631	0.517374	0.349305	0.40473
lcl|NC_007194.1_cds_XP_750448.1_645	0.357317	0.416912	0.275372	0.323098
lcl|NC_007194.1_cds_XP_750449.1_646	0.429091	0.562591	0.347095	0.409091
lcl|NC_007194.1_cds_XP_750450.1_647	0.385077	0.48447	0.296361	0.343529
lcl|NC_007194.1_cds_XP_750451.1_648	0.397131	0.499914	0.317596	0.377727
lcl|NC_007194.1_cds_XP_750452.1_649	0.387679	0.481945	0.282742	0.348678
lcl|NC_007194.1_cds_XP_750453.1_650	0.379283	0.450564	0.296745	0.350923
lcl|NC_007194.1_cds_XP_750454.1_651	0.376861	0.448411	0.293626	0.351547
lcl|NC_007194.1_cds_XP_750455.1_652	0.367857	0.423639	0.286132	0.330695
lcl|NC_007194.1_cds_XP_750456.1_653	0.426942	0.507101	0.347051	0.398564
lcl|NC_007194.1_cds_XP_750457.1_654	0.379734	0.486827	0.297179	0.354373
lcl|NC_007194.1_cds_XP_750458.1_655	0.364364	0.462347	0.282842	0.335029
lcl|NC_007194.1_cds_XP_750459.1_656	0.403252	0.528139	0.326036	0.384361
lcl|NC_007194.1_cds_XP_750461.2_657	0.412243	0.524827	0.33549	0.395235
lcl|NC_007194.1_cds_XP_750462.1_658	0.358435	0.406324	0.288629	0.342574
lcl|NC_007194.1_cds_XP_750463.1_659	0.365539	0.416427	0.295231	0.343613
lcl|NC_007194.1_cds_XP_750464.1_660	0.389956	0.469733	0.30273	0.357342
lcl|NC_007194.1_cds_XP_750465.1_661	0.384974	0.416001	0.309562	0.366161
lcl|NC_007194.1_cds_XP_750466.2_662	0.384774	0.502308	0.300856	0.346441
lcl|NC_007194.1_cds_XP_750467.1_663	0.409672	0.489894	0.332102	0.389511
lcl|NC_007194.1_cds_XP_750468.1_664	0.393421	0.447961	0.318674	0.374396
lcl|NC_007194.1_cds_XP_750469.1_665	0.416894	0.472832	0.333978	0.390612
lcl|NC_007194.1_cds_XP_750470.1_666	0.407864	0.510558	0.319627	0.375883
lcl|NC_007194.1_cds_XP_750471.1_667	0.451428	0.558644	0.339565	0.410664
lcl|NC_007194.1_cds_XP_750472.1_668	0.324271	0.376856	0.258333	0.307338
lcl|NC_007194.1_cds_XP_750473.1_669	0.396638	0.493847	0.317281	0.370974
lcl|NC_007194.1_cds_XP_750474.1_670	0.335881	0.373739	0.274567	0.319363
lcl|NC_007194.1_cds_XP_750475.1_671	0.328258	0.361724	0.275658	0.307042
lcl|NC_007194.1_cds_XP_750476.1_672	0.450925	0.518942	0.362509	0.419647
lcl|NC_007194.1_cds_XP_750477.1_673	0.360287	0.456866	0.266764	0.314394
lcl|NC_007194.1_cds_XP_750478.1_674	0.330918	0.428254	0.241302	0.290147
lcl|NC_007194.1_cds_XP_750479.1_675	0.377413	0.430115	0.30203	0.358933
lcl|NC_007194.1_cds_XP_750480.1_676	0.358418	0.397603	0.279156	0.33157
lcl|NC_007194.1_cds_XP_750481.1_677	0.372363	0.410108	0.301728	0.352997
lcl|NC_007194.1_cds_XP_750482.1_678	0.360852	0.420766	0.284184	0.330283
lcl|NC_007194.1_cds_XP_750483.1_679	0.370983	0.45587	0.301902	0.346963
lcl|NC_007194.1_cds_XP_750484.1_680	0.385844	0.530315	0.310762	0.348335
lcl|NC_007194.1_cds_XP_750485.1_681	0.461007	0.579517	0.374167	0.438904
lcl|NC_007194.1_cds_XP_750486.1_682	0.413572	0.492938	0.326404	0.391401
lcl|NC_007194.1_cds_XP_750488.1_683	0.430995	0.511937	0.349867	0.417983
lcl|NC_007194.1_cds_XP_750489.2_684	0.542001	0.645333	0.458033	0.533362
lcl|NC_007194.1_cds_XP_750490.1_685	0.579248	0.783708	0.460655	0.535208
lcl|NC_007194.1_cds_XP_750491.2_686	0.449501	0.564825	0.363519	0.418393
lcl|NC_007194.1_cds_XP_750493.1_687	0.480772	0.611485	0.385991	0.44335
lcl|NC_007194.1_cds_XP_750494.1_688	0.370567	0.438955	0.30021	0.354046
lcl|NC_007194.1_cds_XP_750495.1_689	0.371512	0.436371	0.294388	0.341987
lcl|NC_007194.1_cds_XP_750496.1_690	0.373452	0.475625	0.295649	0.351496
lcl|NC_007194.1_cds_XP_750497.1_691	0.381382	0.418784	0.303989	0.354625
lcl|NC_007194.1_cds_XP_750498.1_692	0.452886	0.595546	0.347397	0.41352
lcl|NC_007194.1_cds_XP_750499.1_693	0.524757	0.675512	0.433533	0.494184
lcl|NC_007194.1_cds_XP_750500.1_694	0.408157	0.456746	0.331798	0.3863
lcl|NC_007194.1_cds_XP_750502.1_697	0.392077	0.477998	0.31414	0.361909
lcl|NC_007194.1_cds_XP_750503.1_698	0.361324	0.426983	0.295488	0.34414
lcl|NC_007194.1_cds_XP_750504.1_699	0.370135	0.434179	0.287946	0.335344
lcl|NC_007194.1_cds_XP_750505.2_700	0.356564	0.40431	0.283323	0.340093
lcl|NC_007194.1_cds_XP_750506.1_701	0.345811	0.392437	0.273397	0.322811
lcl|NC_007194.1_cds_XP_750507.1_702	0.331943	0.371995	0.258818	0.30727
lcl|NC_007194.1_cds_XP_750508.1_703	0.348668	0.391747	0.283622	0.329648
lcl|NC_007194.1_cds_XP_750509.1_705	0.416399	0.556354	0.359219	0.421719
lcl|NC_007194.1_cds_XP_750510.1_706	0.359739	0.396807	0.290579	0.338942
lcl|NC_007194.1_cds_XP_750511.1_707	0.363416	0.410754	0.285814	0.337005
lcl|NC_007194.1_cds_XP_750512.1_708	0.315606	0.359991	0.250076	0.293166
lcl|NC_007194.1_cds_XP_750513.1_709	0.353091	0.403871	0.278005	0.329356
lcl|NC_007194.1_cds_XP_750514.2_710	0.387606	0.415758	0.317982	0.378664
lcl|NC_007194.1_cds_XP_750515.1_711	0.360022	0.428649	0.292297	0.34713
lcl|NC_007194.1_cds_XP_750516.1_712	0.363038	0.417661	0.284885	0.339681
lcl|NC_007194.1_cds_XP_750517.2_713	0.342144	0.37949	0.274486	0.323127
lcl|NC_007194.1_cds_XP_750518.1_714	0.372601	0.410045	0.306022	0.353901
lcl|NC_007194.1_cds_XP_750519.1_715	0.335544	0.383844	0.271121	0.326755
lcl|NC_007194.1_cds_XP_750520.1_716	0.355575	0.385909	0.293977	0.346582
lcl|NC_007194.1_cds_XP_750521.1_717	0.341633	0.380724	0.276305	0.324353
lcl|NC_007194.1_cds_XP_752242.1_718	0.35296	0.392481	0.283042	0.340422
lcl|NC_007194.1_cds_XP_752243.1_719	0.394235	0.45984	0.319985	0.379682
lcl|NC_007194.1_cds_XP_752244.1_720	0.320363	0.344671	0.271282	0.314468
lcl|NC_007194.1_cds_XP_752246.1_721	0.369201	0.42424	0.297965	0.34986
lcl|NC_007194.1_cds_XP_752247.1_723	0.363362	0.414867	0.296405	0.343435
lcl|NC_007194.1_cds_XP_752248.1_724	0.397081	0.457554	0.321846	0.374353
lcl|NC_007194.1_cds_XP_752249.1_725	0.36445	0.440307	0.290528	0.345076
lcl|NC_007194.1_cds_XP_752250.1_726	0.355356	0.406221	0.285255	0.328783
lcl|NC_007194.1_cds_XP_752251.1_727	0.381219	0.434263	0.306943	0.366066
lcl|NC_007194.1_cds_XP_752252.1_728	0.413962	0.494175	0.33784	0.396937
lcl|NC_007194.1_cds_XP_752253.1_729	0.358096	0.383081	0.294653	0.348481
lcl|NC_007194.1_cds_XP_752254.1_730	0.335446	0.360187	0.270185	0.316576
lcl|NC_007194.1_cds_XP_752255.1_731	0.416149	0.505173	0.337359	0.39797
lcl|NC_007194.1_cds_XP_752256.1_732	0.342645	0.419526	0.257892	0.291857
lcl|NC_007194.1_cds_XP_752257.1_733	0.33453	0.398473	0.272329	0.326587
lcl|NC_007194.1_cds_XP_752258.2_734	0.361006	0.422023	0.291131	0.347492
lcl|NC_007194.1_cds_XP_752259.1_735	0.375831	0.418538	0.306088	0.352634
lcl|NC_007194.1_cds_XP_752260.1_736	0.394144	0.491431	0.302835	0.360951
lcl|NC_007194.1_cds_XP_752261.1_737	0.381103	0.482321	0.29815	0.353573
lcl|NC_007194.1_cds_XP_752262.1_738	0.362262	0.438352	0.28393	0.340043
lcl|NC_007194.1_cds_XP_752263.1_739	0.392829	0.501016	0.320229	0.389367
lcl|NC_007194.1_cds_XP_752264.1_740	0.358012	0.434813	0.280735	0.326611
lcl|NC_007194.1_cds_XP_752265.2_741	0.413965	0.500944	0.336299	0.399613
lcl|NC_007194.1_cds_XP_752266.1_742	0.364414	0.433028	0.290783	0.3452
lcl|NC_007194.1_cds_XP_752267.1_743	0.388577	0.434742	0.315536	0.369257
lcl|NC_007194.1_cds_XP_752268.1_744	0.424666	0.522658	0.346365	0.402759
lcl|NC_007194.1_cds_XP_752269.1_745	0.376215	0.462912	0.303741	0.357812
lcl|NC_007194.1_cds_XP_752270.1_746	0.478499	0.578751	0.39736	0.443977
lcl|NC_007194.1_cds_XP_752271.1_747	0.352802	0.415345	0.27444	0.326045
lcl|NC_007194.1_cds_XP_752272.1_748	0.45035	0.5668	0.376306	0.428099
lcl|NC_007194.1_cds_XP_752273.1_749	0.345813	0.395292	0.268457	0.317159
lcl|NC_007194.1_cds_XP_752274.1_750	0.350187	0.392901	0.273715	0.31741
lcl|NC_007194.1_cds_XP_752275.1_751	0.345359	0.381976	0.273697	0.323535
lcl|NC_007194.1_cds_XP_752276.1_752	0.376701	0.406821	0.304403	0.35324
lcl|NC_007194.1_cds_XP_752277.1_753	0.532532	0.72134	0.418922	0.484229
lcl|NC_007194.1_cds_XP_752278.1_754	0.362084	0.436423	0.283795	0.339325
lcl|NC_007194.1_cds_XP_752279.1_755	0.407313	0.600851	0.288521	0.344497
lcl|NC_007194.1_cds_XP_752280.1_756	0.405451	0.522709	0.322475	0.381631
lcl|NC_007194.1_cds_XP_752281.1_757	0.386434	0.436242	0.317762	0.369496
lcl|NC_007194.1_cds_XP_752282.1_758	0.372226	0.44238	0.298251	0.349435
lcl|NC_007194.1_cds_XP_752283.1_759	0.406694	0.445259	0.326107	0.385056
lcl|NC_007194.1_cds_XP_752284.1_760	0.387012	0.490864	0.313134	0.367193
lcl|NC_007194.1_cds_XP_752285.1_761	0.40332	0.445454	0.326248	0.38286
lcl|NC_007194.1_cds_XP_752286.1_762	0.333589	0.381444	0.267276	0.316065
lcl|NC_007194.1_cds_XP_752287.1_763	0.41737	0.482698	0.351089	0.408755
lcl|NC_007194.1_cds_XP_752288.1_764	0.374269	0.43879	0.296888	0.34644
lcl|NC_007194.1_cds_XP_752289.1_765	0.388904	0.401598	0.321737	0.36396
lcl|NC_007194.1_cds_XP_752290.1_766	0.36294	0.403987	0.298239	0.351181
lcl|NC_007194.1_cds_XP_752291.1_767	0.34204	0.367656	0.2755	0.317047
lcl|NC_007194.1_cds_XP_752292.1_768	0.39075	0.439592	0.324925	0.377487
lcl|NC_007194.1_cds_XP_752293.1_769	0.389599	0.411982	0.335652	0.381843
lcl|NC_007194.1_cds_XP_752294.1_770	0.340733	0.412518	0.270935	0.319731
lcl|NC_007194.1_cds_XP_752295.1_771	0.394717	0.472984	0.314053	0.375589
lcl|NC_007194.1_cds_XP_752296.1_772	0.376476	0.444913	0.295796	0.353694
lcl|NC_007194.1_cds_XP_752297.1_773	0.447894	0.633004	0.34877	0.404806
lcl|NC_007194.1_cds_XP_752298.1_774	0.376014	0.468401	0.291527	0.342352
lcl|NC_007194.1_cds_XP_752299.1_775	0.369038	0.461272	0.291365	0.341406
lcl|NC_007194.1_cds_XP_752300.1_776	0.468645	0.559653	0.378133	0.43425
lcl|NC_007194.1_cds_XP_752301.1_777	0.34433	0.364064	0.284236	0.326245
lcl|NC_007194.1_cds_XP_752302.1_778	0.39421	0.441059	0.330245	0.38896
lcl|NC_007194.1_cds_XP_752303.1_779	0.35801	0.413213	0.285884	0.324344
lcl|NC_007194.1_cds_XP_752304.1_780	0.350528	0.392738	0.281101	0.331513
lcl|NC_007194.1_cds_XP_752305.1_781	0.393118	0.40801	0.313369	0.363022
lcl|NC_007194.1_cds_XP_752306.1_782	0.296478	0.319387	0.245496	0.287927
lcl|NC_007194.1_cds_XP_752307.1_783	0.337043	0.380924	0.271485	0.325013
lcl|NC_007194.1_cds_XP_752308.1_784	0.363488	0.434166	0.2791	0.324504
lcl|NC_007194.1_cds_XP_752309.1_785	0.342636	0.377937	0.259086	0.303664
lcl|NC_007194.1_cds_XP_752310.1_786	0.356237	0.3824	0.281875	0.33044
lcl|NC_007194.1_cds_XP_752311.1_787	0.557294	0.762455	0.448655	0.52335
lcl|NC_007194.1_cds_XP_752312.1_788	0.406037	0.48738	0.322491	0.377578
lcl|NC_007194.1_cds_XP_752313.1_789	0.347006	0.404308	0.276283	0.327516
lcl|NC_007194.1_cds_XP_752314.1_790	0.470752	0.606648	0.374116	0.432684
lcl|NC_007194.1_cds_XP_752315.1_791	0.382613	0.47097	0.294824	0.355139
lcl|NC_007194.1_cds_XP_752316.1_792	0.439669	0.486761	0.358518	0.419172
lcl|NC_007194.1_cds_XP_752317.1_793	0.395846	0.488481	0.314798	0.375927
lcl|NC_007194.1_cds_XP_752318.1_794	0.42124	0.531388	0.327155	0.383512
lcl|NC_007194.1_cds_XP_752319.1_795	0.364516	0.428031	0.280818	0.329794
lcl|NC_007194.1_cds_XP_752320.1_796	0.357281	0.415187	0.282933	0.336579
lcl|NC_007194.1_cds_XP_752321.1_797	0.41713	0.521571	0.325197	0.375653
lcl|NC_007194.1_cds_XP_752322.1_798	0.404369	0.473238	0.327106	0.380549
lcl|NC_007194.1_cds_XP_752323.1_799	0.366277	0.437025	0.285139	0.343193
lcl|NC_007194.1_cds_XP_752324.1_800	0.337912	0.388947	0.272255	0.321973
lcl|NC_007194.1_cds_XP_752325.1_801	0.363391	0.450131	0.278627	0.326431
lcl|NC_007194.1_cds_XP_752326.1_802	0.388849	0.49571	0.304093	0.360535
lcl|NC_007194.1_cds_XP_752327.1_803	0.439148	0.564301	0.345957	0.410584
lcl|NC_007194.1_cds_XP_752328.1_804	0.360614	0.406964	0.293806	0.346696
lcl|NC_007194.1_cds_XP_752329.1_805	0.344063	0.401778	0.268341	0.318741
lcl|NC_007194.1_cds_XP_752330.1_806	0.39515	0.45434	0.324222	0.380216
lcl|NC_007194.1_cds_XP_752331.1_807	0.368035	0.407718	0.29523	0.344022
lcl|NC_007194.1_cds_XP_752332.1_808	0.36226	0.429872	0.286339	0.347825
lcl|NC_007194.1_cds_XP_752333.1_809	0.485983	0.676286	0.380067	0.44291
lcl|NC_007194.1_cds_XP_752334.1_810	0.412462	0.534111	0.332475	0.393695
lcl|NC_007194.1_cds_XP_752335.2_811	0.30947	0.415239	0.22356	0.258096
lcl|NC_007194.1_cds_XP_752336.1_812	0.390867	0.489123	0.30581	0.361515
lcl|NC_007194.1_cds_XP_752337.1_813	0.345946	0.406899	0.257232	0.305231
lcl|NC_007194.1_cds_XP_752338.1_814	0.315697	0.369233	0.248033	0.284441
lcl|NC_007194.1_cds_XP_752339.1_815	0.307982	0.36829	0.240444	0.276133
lcl|NC_007194.1_cds_XP_752340.1_816	0.333886	0.363943	0.265583	0.316007
lcl|NC_007194.1_cds_XP_752341.1_817	0.399842	0.49272	0.326931	0.378371
lcl|NC_007194.1_cds_XP_752343.2_820	0.37118	0.432869	0.295127	0.347391
lcl|NC_007194.1_cds_XP_752344.1_821	0.399935	0.455955	0.33001	0.382161
lcl|NC_007194.1_cds_XP_752345.1_822	0.397603	0.455115	0.304797	0.360652
lcl|NC_007194.1_cds_XP_752346.1_823	0.37265	0.429133	0.296435	0.350983
lcl|NC_007194.1_cds_XP_752347.1_824	0.502053	0.667911	0.400112	0.467099
lcl|NC_007194.1_cds_XP_752348.1_825	0.359712	0.423776	0.267822	0.330758
lcl|NC_007194.1_cds_XP_752349.1_826	0.340773	0.394852	0.26951	0.317031
lcl|NC_007194.1_cds_XP_752350.1_827	0.473625	0.569938	0.387217	0.450062
lcl|NC_007194.1_cds_XP_752351.1_828	0.418066	0.471891	0.344191	0.396004
lcl|NC_007194.1_cds_XP_752352.1_829	0.373753	0.432913	0.312472	0.369265
lcl|NC_007194.1_cds_XP_752354.1_830	0.366527	0.431605	0.289371	0.340786
lcl|NC_007194.1_cds_XP_752355.1_831	0.317374	0.346388	0.262936	0.297597
lcl|NC_007194.1_cds_XP_752356.1_832	0.404801	0.549983	0.311197	0.376732
lcl|NC_007194.1_cds_XP_752357.1_833	0.434631	0.55142	0.351823	0.412941
lcl|NC_007194.1_cds_XP_752358.1_834	0.401374	0.512798	0.323181	0.379023
lcl|NC_007194.1_cds_XP_752359.1_835	0.35312	0.385386	0.283099	0.321126
lcl|NC_007194.1_cds_XP_752360.1_836	0.434173	0.549177	0.356056	0.414157
lcl|NC_007194.1_cds_XP_752361.1_837	0.399656	0.463466	0.327429	0.389172
lcl|NC_007194.1_cds_XP_752362.1_838	0.439643	0.573296	0.361833	0.433698
lcl|NC_007194.1_cds_XP_752363.2_839	0.375081	0.426046	0.292	0.350992
lcl|NC_007194.1_cds_XP_752364.1_840	0.479473	0.654647	0.392904	0.443778
lcl|NC_007194.1_cds_XP_752365.1_841	0.394002	0.498656	0.302775	0.362967
lcl|NC_007194.1_cds_XP_752368.2_843	0.394834	0.470287	0.330397	0.374835
lcl|NC_007194.1_cds_XP_752369.1_844	0.356502	0.46732	0.274956	0.324962
lcl|NC_007194.1_cds_XP_752370.1_845	0.377936	0.426169	0.301913	0.343074
lcl|NC_007194.1_cds_XP_752371.1_846	0.397146	0.445662	0.321014	0.377835
lcl|NC_007194.1_cds_XP_752372.1_847	0.325262	0.391736	0.234817	0.287096
lcl|NC_007194.1_cds_XP_752374.1_848	0.317297	0.44172	0.247869	0.303694
lcl|NC_007194.1_cds_XP_752375.1_849	0.380177	0.494276	0.277435	0.329865
lcl|NC_007194.1_cds_XP_752376.1_850	0.422475	0.592387	0.300583	0.370541
lcl|NC_007194.1_cds_XP_752377.1_851	0.425602	0.527302	0.304713	0.378586
lcl|NC_007194.1_cds_XP_752378.1_852	0.400834	0.529103	0.286611	0.344495
lcl|NC_007194.1_cds_XP_752379.1_853	0.574506	0.794999	0.456432	0.529057
lcl|NC_007194.1_cds_XP_752380.1_854	0.398441	0.504153	0.30132	0.362954
lcl|NC_007194.1_cds_XP_752381.1_855	0.372577	0.447548	0.295898	0.353684
lcl|NC_007194.1_cds_XP_752382.1_856	0.381063	0.452745	0.299638	0.351634
lcl|NC_007194.1_cds_XP_752383.1_857	0.419313	0.550267	0.322119	0.382419
lcl|NC_007194.1_cds_XP_752384.1_858	0.3628	0.450563	0.278374	0.33202
lcl|NC_007194.1_cds_XP_752385.1_859	0.383146	0.474077	0.284388	0.336704
lcl|NC_007194.1_cds_XP_752386.1_860	0.443299	0.576149	0.348077	0.410879
lcl|NC_007194.1_cds_XP_752387.1_861	0.386349	0.498332	0.30034	0.355844
lcl|NC_007194.1_cds_XP_752388.1_862	0.379346	0.485991	0.29435	0.35039
lcl|NC_007194.1_cds_XP_752389.1_863	0.358982	0.446496	0.290609	0.345988
lcl|NC_007194.1_cds_XP_752390.1_864	0.339078	0.367482	0.297771	0.338195
lcl|NC_007194.1_cds_XP_752391.1_865	0.359535	0.403436	0.312782	0.354544
lcl|NC_007194.1_cds_XP_752392.1_866	0.337444	0.470417	0.251501	0.304533
lcl|NC_007194.1_cds_XP_752393.1_867	0.432417	0.55928	0.338648	0.390774
lcl|NC_007194.1_cds_XP_752394.1_868	0.404516	0.541784	0.313308	0.366069
lcl|NC_007194.1_cds_XP_752395.1_869	0.412508	0.487257	0.333567	0.390254
lcl|NC_007194.1_cds_XP_752396.1_870	0.376403	0.438135	0.305385	0.347194
lcl|NC_007194.1_cds_XP_752397.1_871	0.466124	0.574705	0.385669	0.45167
lcl|NC_007194.1_cds_XP_752398.1_872	0.408018	0.470643	0.331842	0.387625
lcl|NC_007194.1_cds_XP_752399.1_873	0.310763	0.34811	0.243966	0.28657
lcl|NC_007194.1_cds_XP_752400.2_874	0.393794	0.482971	0.313641	0.360851
lcl|NC_007194.1_cds_XP_752401.1_875	0.549661	0.775482	0.437197	0.503973
lcl|NC_007194.1_cds_XP_752402.2_877	0.374962	0.448809	0.297877	0.352292
lcl|NC_007194.1_cds_XP_752403.2_878	0.411409	0.536419	0.315294	0.365308
lcl|NC_007194.1_cds_XP_752404.1_879	0.373836	0.44083	0.304187	0.353058
lcl|NC_007194.1_cds_XP_752405.2_880	0.350064	0.406136	0.27643	0.31702
lcl|NC_007194.1_cds_XP_752406.1_881	0.374449	0.457311	0.296129	0.346538
lcl|NC_007194.1_cds_XP_752407.1_882	0.36322	0.426994	0.278095	0.335439
lcl|NC_007194.1_cds_XP_752408.1_883	0.345218	0.391427	0.282945	0.330832
lcl|NC_007194.1_cds_XP_752409.2_884	0.355724	0.430379	0.292919	0.338976
lcl|NC_007194.1_cds_XP_752410.2_885	0.431815	0.544272	0.338066	0.393558
lcl|NC_007194.1_cds_XP_752411.2_886	0.373784	0.45544	0.289716	0.345593
lcl|NC_007194.1_cds_XP_752412.2_887	0.425913	0.573825	0.323479	0.38886
lcl|NC_007194.1_cds_XP_752413.2_888	0.420607	0.533683	0.341481	0.396794
lcl|NC_007194.1_cds_XP_752414.1_889	0.349921	0.409107	0.272705	0.320981
lcl|NC_007194.1_cds_XP_752415.1_890	0.342874	0.418508	0.272118	0.315703
lcl|NC_007194.1_cds_XP_752416.2_891	0.404046	0.479728	0.308505	0.368723
lcl|NC_007194.1_cds_XP_752417.2_892	0.448206	0.580265	0.344265	0.39531
lcl|NC_007194.1_cds_XP_752420.1_894	0.399884	0.509664	0.320326	0.371386
lcl|NC_007194.1_cds_XP_752421.1_895	0.398644	0.476122	0.288966	0.35559
lcl|NC_007194.1_cds_XP_752422.1_896	0.463788	0.618219	0.366508	0.428584
lcl|NC_007194.1_cds_XP_752423.1_897	0.413855	0.563069	0.307904	0.368751
lcl|NC_007194.1_cds_XP_752424.1_898	0.390147	0.478453	0.31475	0.366293
lcl|NC_007194.1_cds_XP_752425.1_899	0.372589	0.473866	0.274812	0.34103
lcl|NC_007194.1_cds_XP_752426.2_900	0.410182	0.511236	0.316002	0.377873
lcl|NC_007194.1_cds_XP_752427.1_901	0.428191	0.558105	0.334757	0.388737
lcl|NC_007194.1_cds_XP_752428.1_902	0.391074	0.467552	0.30683	0.360016
lcl|NC_007194.1_cds_XP_752429.1_903	0.556256	0.76501	0.435059	0.518682
lcl|NC_007194.1_cds_XP_752430.1_904	0.39089	0.51414	0.301883	0.368157
lcl|NC_007194.1_cds_XP_752432.1_907	0.353571	0.432395	0.270945	0.324345
lcl|NC_007194.1_cds_XP_752433.1_908	0.377889	0.481122	0.283917	0.329728
lcl|NC_007194.1_cds_XP_752434.1_909	0.369106	0.402989	0.294484	0.337513
lcl|NC_007194.1_cds_XP_752435.1_910	0.352129	0.415079	0.274242	0.334413
lcl|NC_007194.1_cds_XP_752436.1_911	0.409497	0.511177	0.332405	0.383505
lcl|NC_007194.1_cds_XP_752437.1_912	0.376968	0.420925	0.30191	0.355343
lcl|NC_007194.1_cds_XP_752438.1_913	0.3733	0.431687	0.302871	0.350673
lcl|NC_007194.1_cds_XP_752439.1_914	0.384366	0.467065	0.295705	0.362581
lcl|NC_007194.1_cds_XP_752440.1_915	0.361917	0.432562	0.282366	0.328389
lcl|NC_007194.1_cds_XP_752441.1_916	0.416129	0.510672	0.336939	0.390193
lcl|NC_007194.1_cds_XP_752442.1_917	0.397997	0.498662	0.314349	0.374318
lcl|NC_007194.1_cds_XP_752443.1_918	0.448947	0.609661	0.335526	0.39121
lcl|NC_007194.1_cds_XP_752444.1_919	0.380087	0.47647	0.302786	0.357557
lcl|NC_007194.1_cds_XP_752445.2_920	0.402283	0.480158	0.315584	0.36986
lcl|NC_007194.1_cds_XP_752446.1_921	0.419874	0.523831	0.328048	0.390907
lcl|NC_007194.1_cds_XP_752447.1_922	0.458746	0.619425	0.335281	0.407479
lcl|NC_007194.1_cds_XP_752448.2_923	0.361972	0.402501	0.283553	0.329907
lcl|NC_007194.1_cds_XP_752449.1_924	0.398684	0.436956	0.302977	0.357433
lcl|NC_007194.1_cds_XP_752450.1_925	0.490332	0.661881	0.402595	0.458549
lcl|NC_007194.1_cds_XP_752451.1_926	0.391678	0.474831	0.309396	0.3655
lcl|NC_007194.1_cds_XP_752452.1_927	0.432044	0.594593	0.317182	0.387395
lcl|NC_007194.1_cds_XP_752453.1_928	0.402641	0.474259	0.323206	0.377854
lcl|NC_007194.1_cds_XP_752454.1_929	0.366074	0.413346	0.28828	0.344889
lcl|NC_007194.1_cds_XP_752455.1_930	0.416178	0.540842	0.320968	0.36902
lcl|NC_007194.1_cds_XP_752456.1_931	0.535574	0.745767	0.43747	0.502235
lcl|NC_007194.1_cds_XP_752457.1_932	0.387688	0.438613	0.313518	0.362526
lcl|NC_007194.1_cds_XP_752458.1_933	0.419194	0.513266	0.342408	0.397379
lcl|NC_007194.1_cds_XP_752459.1_934	0.379057	0.448291	0.303118	0.351086
lcl|NC_007194.1_cds_XP_752460.1_935	0.37191	0.4257	0.311163	0.360119
lcl|NC_007194.1_cds_XP_752461.1_936	0.379306	0.498003	0.291132	0.356382
lcl|NC_007194.1_cds_XP_752462.1_937	0.409269	0.485777	0.327294	0.376941
lcl|NC_007194.1_cds_XP_752463.1_938	0.38514	0.432321	0.304558	0.36327
lcl|NC_007194.1_cds_XP_752464.1_939	0.433111	0.557317	0.337943	0.398709
lcl|NC_007194.1_cds_XP_752465.1_940	0.339937	0.404482	0.263451	0.317043
lcl|NC_007194.1_cds_XP_752466.1_941	0.390678	0.420779	0.303709	0.368965
lcl|NC_007194.1_cds_XP_752467.1_942	0.381501	0.449032	0.302025	0.354493
lcl|NC_007194.1_cds_XP_752468.1_943	0.381189	0.469285	0.303668	0.358861
lcl|NC_007194.1_cds_XP_752469.1_944	0.338075	0.378228	0.271434	0.311697
lcl|NC_007194.1_cds_XP_752470.1_945	0.394598	0.477262	0.308163	0.358523
lcl|NC_007194.1_cds_XP_752471.1_946	0.410077	0.508059	0.315094	0.380458
lcl|NC_007194.1_cds_XP_752472.1_947	0.360373	0.404172	0.282301	0.33126
lcl|NC_007194.1_cds_XP_752473.1_948	0.378206	0.44824	0.301128	0.36036
lcl|NC_007194.1_cds_XP_752474.2_949	0.392696	0.516017	0.311917	0.368703
lcl|NC_007194.1_cds_XP_752475.1_950	0.394137	0.498967	0.297864	0.360063
lcl|NC_007194.1_cds_XP_752476.1_951	0.361291	0.43177	0.28347	0.338174
lcl|NC_007194.1_cds_XP_752477.1_952	0.352195	0.410992	0.276115	0.322277
lcl|NC_007194.1_cds_XP_752478.1_953	0.557289	0.747524	0.451533	0.508272
lcl|NC_007194.1_cds_XP_752479.1_954	0.375486	0.456084	0.29278	0.346302
lcl|NC_007194.1_cds_XP_752480.2_955	0.408899	0.475333	0.335113	0.393363
lcl|NC_007194.1_cds_XP_752481.1_956	0.430396	0.495376	0.342248	0.396331
lcl|NC_007194.1_cds_XP_752482.2_957	0.360624	0.402105	0.289073	0.343219
lcl|NC_007194.1_cds_XP_752483.1_958	0.392325	0.454822	0.307257	0.357124
lcl|NC_007194.1_cds_XP_752484.2_959	0.579626	0.735936	0.483904	0.54994
lcl|NC_007194.1_cds_XP_752485.1_960	0.346126	0.43134	0.262364	0.305125
lcl|NC_007194.1_cds_XP_752486.1_961	0.35606	0.403274	0.282949	0.333233
lcl|NC_007194.1_cds_XP_752487.1_962	0.513016	0.639001	0.404553	0.455817
lcl|NC_007194.1_cds_XP_752488.1_963	0.34744	0.400369	0.267945	0.313501
lcl|NC_007194.1_cds_XP_752489.1_964	0.367058	0.434925	0.282056	0.326149
lcl|NC_007194.1_cds_XP_752490.1_965	0.391454	0.480749	0.301241	0.361214
lcl|NC_007194.1_cds_XP_752491.1_966	0.507762	0.736365	0.413133	0.475637
lcl|NC_007194.1_cds_XP_752492.1_967	0.422644	0.579677	0.31517	0.375983
lcl|NC_007194.1_cds_XP_752493.1_968	0.443475	0.629088	0.334496	0.404674
lcl|NC_007194.1_cds_XP_752494.1_969	0.403349	0.575992	0.303272	0.362638
lcl|NC_007194.1_cds_XP_752495.1_970	0.400895	0.57845	0.29736	0.347333
lcl|NC_007194.1_cds_XP_752496.2_971	0.425021	0.58309	0.312343	0.375697
lcl|NC_007194.1_cds_XP_752497.1_972	0.400957	0.543027	0.303354	0.364708
lcl|NC_007194.1_cds_XP_752498.1_973	0.447629	0.653751	0.34076	0.405167
lcl|NC_007194.1_cds_XP_752499.1_974	0.403234	0.518362	0.306363	0.369801
lcl|NC_007194.1_cds_XP_752500.1_975	0.431788	0.591626	0.327149	0.392418
lcl|NC_007194.1_cds_XP_752501.1_976	0.442161	0.634786	0.335844	0.405597
lcl|NC_007194.1_cds_XP_752502.2_977	0.413686	0.540762	0.312545	0.376603
lcl|NC_007194.1_cds_XP_752503.1_978	0.405031	0.563236	0.297302	0.356039
lcl|NC_007194.1_cds_XP_752504.1_979	0.41587	0.572264	0.304052	0.361631
lcl|NC_007194.1_cds_XP_752505.1_980	0.427883	0.557313	0.336816	0.393094
lcl|NC_007194.1_cds_XP_752506.2_981	0.386595	0.519744	0.293891	0.343634
lcl|NC_007194.1_cds_XP_752507.1_982	0.424393	0.518215	0.344106	0.401218
lcl|NC_007194.1_cds_XP_752508.1_983	0.313029	0.297951	0.275277	0.314457
lcl|NC_007194.1_cds_XP_752509.1_984	0.392043	0.430232	0.316512	0.363453
lcl|NC_007194.1_cds_XP_752510.1_985	0.391965	0.461373	0.315308	0.367312
lcl|NC_007194.1_cds_XP_752511.1_986	0.481117	0.633379	0.3954	0.457266
lcl|NC_007194.1_cds_XP_752512.1_987	0.387447	0.516355	0.319738	0.365153
lcl|NC_007194.1_cds_XP_752513.1_988	0.389271	0.505731	0.307535	0.370049
lcl|NC_007194.1_cds_XP_752514.1_989	0.357472	0.422447	0.290462	0.341333
lcl|NC_007194.1_cds_XP_752515.1_990	0.346559	0.390929	0.280198	0.324066
lcl|NC_007194.1_cds_XP_752516.1_991	0.344638	0.394369	0.274737	0.325474
lcl|NC_007194.1_cds_XP_752517.1_992	0.349722	0.402955	0.273534	0.321934
lcl|NC_007194.1_cds_XP_752518.1_993	0.432705	0.48942	0.330409	0.411774
lcl|NC_007194.1_cds_XP_752519.1_994	0.438559	0.554308	0.342526	0.393341
lcl|NC_007194.1_cds_XP_752520.1_995	0.422547	0.56523	0.324711	0.384632
lcl|NC_007194.1_cds_XP_752521.1_996	0.398234	0.496457	0.317375	0.370736
lcl|NC_007194.1_cds_XP_752522.1_997	0.427951	0.602632	0.316862	0.377461
lcl|NC_007194.1_cds_XP_752523.1_998	0.419022	0.553559	0.306962	0.370698
lcl|NC_007194.1_cds_XP_752524.1_999	0.436832	0.577937	0.345451	0.406863
lcl|NC_007194.1_cds_XP_752525.1_1000	0.419637	0.546014	0.31379	0.366789
lcl|NC_007194.1_cds_XP_752526.1_1001	0.396767	0.476989	0.295932	0.361206
lcl|NC_007194.1_cds_XP_752527.1_1002	0.41023	0.549119	0.302382	0.367637
lcl|NC_007194.1_cds_XP_752528.1_1003	0.351949	0.41037	0.273579	0.323142
lcl|NC_007194.1_cds_XP_752529.1_1004	0.355729	0.420977	0.278824	0.332454
lcl|NC_007194.1_cds_XP_752530.1_1005	0.363802	0.483716	0.280496	0.330515
lcl|NC_007194.1_cds_XP_752531.1_1006	0.399161	0.513658	0.304912	0.362572
lcl|NC_007194.1_cds_XP_752532.1_1007	0.385075	0.473397	0.309303	0.365698
lcl|NC_007194.1_cds_XP_752533.1_1008	0.379244	0.469141	0.293212	0.34523
lcl|NC_007194.1_cds_XP_752534.1_1009	0.322393	0.338609	0.266341	0.305272
lcl|NC_007194.1_cds_XP_752536.1_1010	0.386785	0.446849	0.31141	0.354398
lcl|NC_007194.1_cds_XP_752537.1_1011	0.558522	0.804616	0.450014	0.512299
lcl|NC_007194.1_cds_XP_752539.1_1014	0.449694	0.649179	0.351964	0.409654
lcl|NC_007194.1_cds_XP_752540.1_1015	0.394079	0.552939	0.280469	0.338993
lcl|NC_007194.1_cds_XP_752542.1_1016	0.339442	0.409308	0.276035	0.316438
lcl|NC_007194.1_cds_XP_752543.1_1017	0.43802	0.577825	0.35374	0.409364
lcl|NC_007194.1_cds_XP_752544.1_1018	0.455105	0.568426	0.360461	0.417818
lcl|NC_007194.1_cds_XP_752545.1_1019	0.365239	0.469053	0.269991	0.320529
lcl|NC_007194.1_cds_XP_752546.1_1020	0.389119	0.445756	0.309702	0.359739
lcl|NC_007194.1_cds_XP_752547.1_1021	0.358648	0.405109	0.283429	0.340011
lcl|NC_007194.1_cds_XP_752548.1_1022	0.380913	0.490304	0.285935	0.348174
lcl|NC_007194.1_cds_XP_752549.1_1023	0.446792	0.563438	0.360811	0.418678
lcl|NC_007194.1_cds_XP_752550.1_1024	0.32064	0.349013	0.274479	0.32165
lcl|NC_007194.1_cds_XP_752551.1_1025	0.34622	0.410839	0.271724	0.318147
lcl|NC_007194.1_cds_XP_752552.1_1026	0.471402	0.565872	0.377374	0.436463
lcl|NC_007194.1_cds_XP_752553.1_1027	0.396216	0.487346	0.308644	0.356056
lcl|NC_007194.1_cds_XP_752554.1_1028	0.365759	0.440516	0.292953	0.348015
lcl|NC_007194.1_cds_XP_752555.1_1029	0.401629	0.482222	0.32391	0.380704
lcl|NC_007194.1_cds_XP_752556.1_1030	0.358206	0.473176	0.269629	0.30782
lcl|NC_007194.1_cds_XP_752557.1_1031	0.31663	0.428423	0.242668	0.313546
lcl|NC_007194.1_cds_XP_752558.1_1032	0.363966	0.415951	0.294271	0.351288
lcl|NC_007194.1_cds_XP_752559.1_1033	0.364243	0.431947	0.289481	0.340616
lcl|NC_007194.1_cds_XP_752560.1_1034	0.434184	0.561576	0.343164	0.399582
lcl|NC_007194.1_cds_XP_752561.1_1035	0.357513	0.424811	0.286733	0.334069
lcl|NC_007194.1_cds_XP_752562.1_1036	0.476292	0.605898	0.386045	0.444415
lcl|NC_007194.1_cds_XP_752563.1_1037	0.370704	0.435939	0.287965	0.336924
lcl|NC_007194.1_cds_XP_752564.1_1038	0.362923	0.461005	0.27812	0.330347
lcl|NC_007194.1_cds_XP_752565.1_1039	0.373102	0.435745	0.295528	0.351345
lcl|NC_007194.1_cds_XP_752566.1_1040	0.387944	0.476084	0.311474	0.364534
lcl|NC_007194.1_cds_XP_752567.1_1041	0.369991	0.391172	0.300326	0.361354
lcl|NC_007194.1_cds_XP_752568.1_1042	0.359025	0.433927	0.282643	0.328028
lcl|NC_007194.1_cds_XP_752569.1_1043	0.40373	0.516743	0.319916	0.376408
lcl|NC_007194.1_cds_XP_752570.1_1044	0.355023	0.39165	0.286641	0.339211
lcl|NC_007194.1_cds_XP_752571.1_1045	0.356925	0.459196	0.271235	0.322947
lcl|NC_007194.1_cds_XP_752572.1_1046	0.362302	0.438822	0.284842	0.348663
lcl|NC_007194.1_cds_XP_752573.1_1047	0.358796	0.419934	0.278318	0.336027
lcl|NC_007194.1_cds_XP_752574.1_1048	0.452563	0.54514	0.368747	0.420832
lcl|NC_007194.1_cds_XP_752575.1_1049	0.474185	0.617112	0.370948	0.43217
lcl|NC_007194.1_cds_XP_752576.1_1050	0.348265	0.402879	0.267758	0.317373
lcl|NC_007194.1_cds_XP_752577.1_1051	0.340909	0.392068	0.269489	0.318546
lcl|NC_007194.1_cds_XP_752578.1_1052	0.357392	0.446778	0.275688	0.332928
lcl|NC_007194.1_cds_XP_752579.1_1053	0.404216	0.479371	0.322309	0.355608
lcl|NC_007194.1_cds_XP_752580.1_1054	0.369756	0.390769	0.301241	0.351962
lcl|NC_007194.1_cds_XP_752581.1_1055	0.340944	0.467213	0.266077	0.309083
lcl|NC_007194.1_cds_XP_752582.1_1056	0.369121	0.439328	0.290411	0.340911
lcl|NC_007194.1_cds_XP_752583.1_1057	0.414475	0.475643	0.348874	0.403063
lcl|NC_007194.1_cds_XP_752584.1_1058	0.319281	0.352522	0.249039	0.290633
lcl|NC_007194.1_cds_XP_752585.1_1059	0.513094	0.649541	0.423382	0.482191
lcl|NC_007194.1_cds_XP_752586.1_1060	0.400252	0.471231	0.322705	0.381873
lcl|NC_007194.1_cds_XP_752587.2_1061	0.355274	0.436333	0.274911	0.326565
lcl|NC_007194.1_cds_XP_752588.2_1062	0.364273	0.488639	0.268628	0.309928
lcl|NC_007194.1_cds_XP_752589.1_1063	0.415538	0.519921	0.328646	0.388245
lcl|NC_007194.1_cds_XP_752590.2_1064	0.347116	0.419432	0.272849	0.323363
lcl|NC_007194.1_cds_XP_752591.2_1065	0.355662	0.417619	0.274502	0.323672
lcl|NC_007194.1_cds_XP_752592.2_1066	0.418989	0.510911	0.344212	0.395322
lcl|NC_007194.1_cds_XP_752593.1_1067	0.464941	0.61955	0.342681	0.413857
lcl|NC_007194.1_cds_XP_752594.2_1068	0.438794	0.493219	0.359492	0.41636
lcl|NC_007194.1_cds_XP_752595.1_1069	0.373012	0.493844	0.272256	0.319188
lcl|NC_007194.1_cds_XP_752596.2_1070	0.371233	0.429338	0.290559	0.344723
lcl|NC_007194.1_cds_XP_752597.1_1071	0.423066	0.6311	0.323826	0.381392
lcl|NC_007194.1_cds_XP_752598.1_1072	0.393293	0.498121	0.298966	0.358363
lcl|NC_007194.1_cds_XP_752599.1_1073	0.426177	0.570579	0.323053	0.387764
lcl|NC_007194.1_cds_XP_752600.1_1074	0.328451	0.401419	0.249343	0.286245
lcl|NC_007194.1_cds_XP_752603.1_1076	0.383246	0.478479	0.301695	0.355146
lcl|NC_007194.1_cds_XP_752604.1_1077	0.442404	0.58379	0.356006	0.411015
lcl|NC_007194.1_cds_XP_752605.1_1078	0.314801	0.413735	0.232965	0.289382
lcl|NC_007194.1_cds_XP_752606.1_1079	0.364744	0.430249	0.290465	0.343405
lcl|NC_007194.1_cds_XP_752607.1_1080	0.358827	0.425744	0.282501	0.332412
lcl|NC_007194.1_cds_XP_752608.1_1081	0.407609	0.45479	0.336558	0.393063
lcl|NC_007194.1_cds_XP_752609.1_1082	0.398114	0.480532	0.317395	0.381301
lcl|NC_007194.1_cds_XP_752610.1_1083	0.433157	0.58445	0.333162	0.394791
lcl|NC_007194.1_cds_XP_752611.1_1084	0.382283	0.434678	0.314335	0.366907
lcl|NC_007194.1_cds_XP_752613.1_1085	0.451938	0.598822	0.327553	0.388328
lcl|NC_007194.1_cds_XP_752614.1_1086	0.368346	0.412567	0.286205	0.34017
lcl|NC_007194.1_cds_XP_752615.1_1087	0.395383	0.495837	0.309704	0.357903
lcl|NC_007194.1_cds_XP_752616.1_1088	0.403158	0.496973	0.328145	0.389779
lcl|NC_007194.1_cds_XP_752618.1_1089	0.371634	0.455179	0.289694	0.340444
lcl|NC_007194.1_cds_XP_752619.1_1090	0.386953	0.480964	0.308633	0.357905
lcl|NC_007194.1_cds_XP_752620.1_1091	0.342848	0.355703	0.290983	0.337066
lcl|NC_007194.1_cds_XP_752621.1_1092	0.412024	0.494753	0.324395	0.377941
lcl|NC_007194.1_cds_XP_752622.1_1093	0.354093	0.424969	0.267624	0.314706
lcl|NC_007194.1_cds_XP_752623.1_1094	0.47601	0.679306	0.378826	0.436362
lcl|NC_007194.1_cds_XP_752624.1_1095	0.383232	0.452489	0.299807	0.356378
lcl|NC_007194.1_cds_XP_752625.1_1096	0.381296	0.461023	0.303495	0.355974
lcl|NC_007194.1_cds_XP_752626.1_1097	0.491898	0.659874	0.410708	0.46818
lcl|NC_007194.1_cds_XP_752627.1_1098	0.403234	0.466965	0.32757	0.377106
lcl|NC_007194.1_cds_XP_752628.1_1099	0.427925	0.515404	0.324264	0.408419
lcl|NC_007194.1_cds_XP_752629.1_1100	0.5251	0.648291	0.427725	0.485498
lcl|NC_007194.1_cds_XP_752630.1_1101	0.372648	0.443094	0.303236	0.355248
lcl|NC_007194.1_cds_XP_752631.1_1102	0.549604	0.713831	0.439238	0.508285
lcl|NC_007194.1_cds_XP_752632.1_1103	0.455979	0.617933	0.345993	0.408197
lcl|NC_007194.1_cds_XP_752633.1_1104	0.383764	0.494186	0.299649	0.3545
lcl|NC_007194.1_cds_XP_752634.1_1105	0.396156	0.514297	0.291635	0.356498
lcl|NC_007194.1_cds_XP_752635.1_1106	0.474308	0.642995	0.356221	0.419585
lcl|NC_007194.1_cds_XP_752636.1_1107	0.370029	0.422259	0.300154	0.359452
lcl|NC_007194.1_cds_XP_752637.1_1108	0.369148	0.448914	0.288791	0.335181
lcl|NC_007194.1_cds_XP_752638.1_1109	0.384654	0.464884	0.308116	0.362721
lcl|NC_007194.1_cds_XP_752639.1_1110	0.376357	0.455323	0.295291	0.348129
lcl|NC_007194.1_cds_XP_752640.1_1111	0.363054	0.417307	0.291656	0.342476
lcl|NC_007194.1_cds_XP_752641.1_1112	0.320005	0.409761	0.240794	0.270067
lcl|NC_007194.1_cds_XP_752642.1_1113	0.351049	0.426803	0.279232	0.33389
lcl|NC_007194.1_cds_XP_752643.1_1114	0.383105	0.451112	0.308304	0.355431
lcl|NC_007194.1_cds_XP_752644.1_1115	0.445501	0.522409	0.370732	0.430544
lcl|NC_007194.1_cds_XP_752645.1_1116	0.344776	0.403448	0.274306	0.320672
lcl|NC_007194.1_cds_XP_752646.1_1117	0.424214	0.511989	0.344868	0.397998
lcl|NC_007194.1_cds_XP_752647.1_1118	0.331957	0.392152	0.26705	0.313561
lcl|NC_007194.1_cds_XP_752648.1_1119	0.369933	0.426494	0.299869	0.342642
lcl|NC_007194.1_cds_XP_752649.1_1120	0.355566	0.416254	0.277159	0.323779
lcl|NC_007194.1_cds_XP_752650.1_1121	0.510031	0.671981	0.41907	0.483563
lcl|NC_007194.1_cds_XP_752651.1_1122	0.370345	0.446939	0.293094	0.337225
lcl|NC_007194.1_cds_XP_752652.1_1123	0.34405	0.39487	0.27263	0.323745
lcl|NC_007194.1_cds_XP_752653.1_1124	0.383273	0.434908	0.314865	0.363486
lcl|NC_007194.1_cds_XP_752654.1_1125	0.406287	0.489401	0.327079	0.384736
lcl|NC_007194.1_cds_XP_752655.1_1126	0.405059	0.483116	0.330985	0.380374
lcl|NC_007194.1_cds_XP_752656.1_1127	0.390866	0.49527	0.29478	0.36275
lcl|NC_007194.1_cds_XP_752657.2_1128	0.397555	0.488679	0.311555	0.365973
lcl|NC_007194.1_cds_XP_752658.2_1130	0.358639	0.425822	0.283159	0.329093
lcl|NC_007194.1_cds_XP_752659.1_1131	0.56218	0.768608	0.440625	0.510539
lcl|NC_007194.1_cds_XP_752660.2_1132	0.376932	0.426363	0.30609	0.361165
lcl|NC_007194.1_cds_XP_752661.1_1133	0.404819	0.536372	0.304906	0.352706
lcl|NC_007194.1_cds_XP_752662.2_1134	0.398103	0.485385	0.320727	0.377997
lcl|NC_007194.1_cds_XP_752663.1_1135	0.3132	0.370648	0.242079	0.291232
lcl|NC_007194.1_cds_XP_752664.1_1136	0.391638	0.475938	0.317953	0.36263
lcl|NC_007194.1_cds_XP_752665.1_1137	0.354912	0.411203	0.286641	0.331337
lcl|NC_007194.1_cds_XP_752666.1_1138	0.394845	0.494332	0.316478	0.365434
lcl|NC_007194.1_cds_XP_752667.1_1139	0.395988	0.488804	0.321257	0.371112
lcl|NC_007194.1_cds_XP_752668.1_1140	0.315514	0.359066	0.246464	0.286802
lcl|NC_007194.1_cds_XP_752669.1_1141	0.351099	0.397603	0.28177	0.323855
lcl|NC_007194.1_cds_XP_752670.1_1142	0.355698	0.385643	0.27125	0.316994
lcl|NC_007194.1_cds_XP_752671.1_1143	0.4082	0.478351	0.330269	0.384333
lcl|NC_007194.1_cds_XP_752672.1_1144	0.400189	0.479986	0.309504	0.359103
lcl|NC_007194.1_cds_XP_752673.1_1145	0.349314	0.385831	0.286022	0.334019
lcl|NC_007194.1_cds_XP_752674.1_1146	0.368754	0.426075	0.300273	0.355431
lcl|NC_007194.1_cds_XP_752675.1_1147	0.383682	0.453821	0.313692	0.367581
lcl|NC_007194.1_cds_XP_752676.1_1148	0.400005	0.485649	0.327022	0.382874
lcl|NC_007194.1_cds_XP_752677.1_1149	0.401894	0.471694	0.313169	0.367483
lcl|NC_007194.1_cds_XP_752678.1_1150	0.401464	0.439749	0.332393	0.390578
lcl|NC_007194.1_cds_XP_752679.1_1151	0.387767	0.45585	0.311543	0.368543
lcl|NC_007194.1_cds_XP_752680.1_1152	0.347716	0.401182	0.271357	0.315751
lcl|NC_007194.1_cds_XP_752681.1_1153	0.387034	0.475413	0.302989	0.356331
lcl|NC_007194.1_cds_XP_752682.1_1154	0.375998	0.45388	0.301358	0.347602
lcl|NC_007194.1_cds_XP_752683.1_1155	0.399691	0.430825	0.309491	0.35776
lcl|NC_007194.1_cds_XP_752684.1_1156	0.475126	0.629843	0.381632	0.44524
lcl|NC_007194.1_cds_XP_752685.1_1157	0.409702	0.551379	0.298713	0.375741
lcl|NC_007194.1_cds_XP_752686.1_1158	0.404124	0.513486	0.318883	0.382973
lcl|NC_007194.1_cds_XP_752687.1_1159	0.34078	0.422992	0.25073	0.300116
lcl|NC_007194.1_cds_XP_752688.1_1160	0.316029	0.416199	0.229804	0.272587
lcl|NC_007194.1_cds_XP_752689.1_1161	0.343205	0.437601	0.274809	0.332039
lcl|NC_007194.1_cds_XP_752690.1_1163	0.367923	0.452898	0.283278	0.333014
lcl|NC_007194.1_cds_XP_752691.1_1164	0.38535	0.498278	0.301996	0.358674
lcl|NC_007194.1_cds_XP_752692.2_1165	0.357414	0.418893	0.28177	0.327779
lcl|NC_007194.1_cds_XP_752693.1_1166	0.409211	0.541055	0.316941	0.371492
lcl|NC_007194.1_cds_XP_752694.2_1167	0.408735	0.591929	0.295661	0.360126
lcl|NC_007194.1_cds_XP_752695.1_1168	0.378433	0.449396	0.306616	0.360579
lcl|NC_007194.1_cds_XP_752696.1_1169	0.415732	0.507195	0.316075	0.380606
lcl|NC_007194.1_cds_XP_752697.1_1170	0.41463	0.55513	0.320325	0.381679
lcl|NC_007194.1_cds_XP_752698.1_1171	0.411034	0.507087	0.323685	0.384044
lcl|NC_007194.1_cds_XP_752699.1_1172	0.392532	0.464184	0.307534	0.358679
lcl|NC_007194.1_cds_XP_752700.1_1173	0.35495	0.398883	0.277669	0.328051
lcl|NC_007194.1_cds_XP_752701.1_1174	0.362304	0.464812	0.275849	0.334138
lcl|NC_007194.1_cds_XP_752702.1_1175	0.390597	0.524566	0.286878	0.341287
lcl|NC_007194.1_cds_XP_752703.1_1176	0.448764	0.606303	0.350195	0.403053
lcl|NC_007194.1_cds_XP_752704.2_1177	0.378741	0.473905	0.288984	0.340039
lcl|NC_007194.1_cds_XP_752705.1_1178	0.347679	0.404908	0.273855	0.317637
lcl|NC_007194.1_cds_XP_752706.1_1179	0.340085	0.392218	0.263178	0.304165
lcl|NC_007194.1_cds_XP_752707.1_1180	0.384671	0.474575	0.29963	0.352631
lcl|NC_007194.1_cds_XP_752708.1_1181	0.326444	0.358006	0.254055	0.29916
lcl|NC_007194.1_cds_XP_752709.1_1182	0.378413	0.458249	0.297763	0.352712
lcl|NC_007194.1_cds_XP_752710.1_1183	0.424285	0.58576	0.353161	0.404566
lcl|NC_007194.1_cds_XP_752711.1_1184	0.410075	0.508221	0.316765	0.368616
lcl|NC_007194.1_cds_XP_752712.1_1185	0.340855	0.416408	0.268156	0.31719
lcl|NC_007194.1_cds_XP_752713.1_1186	0.344824	0.392909	0.275207	0.333749
lcl|NC_007194.1_cds_XP_752714.1_1187	0.371723	0.454286	0.289929	0.345865
lcl|NC_007194.1_cds_XP_752715.1_1188	0.356059	0.402679	0.292902	0.342596
lcl|NC_007194.1_cds_XP_752716.1_1189	0.355397	0.411637	0.266671	0.330389
lcl|NC_007194.1_cds_XP_752717.1_1190	0.469828	0.586788	0.367651	0.435091
lcl|NC_007194.1_cds_XP_752718.1_1191	0.485192	0.639088	0.408025	0.449377
lcl|NC_007194.1_cds_XP_752719.1_1192	0.53755	0.793641	0.42729	0.49285
lcl|NC_007194.1_cds_XP_752720.1_1193	0.533645	0.770048	0.425351	0.493775
lcl|NC_007194.1_cds_XP_752721.1_1194	0.364906	0.438817	0.292434	0.340569
lcl|NC_007194.1_cds_XP_752722.1_1195	0.353024	0.396448	0.274537	0.320739
lcl|NC_007194.1_cds_XP_752723.1_1196	0.376277	0.427253	0.298222	0.342966
lcl|NC_007194.1_cds_XP_752724.1_1197	0.346272	0.393395	0.277355	0.328422
lcl|NC_007194.1_cds_XP_752725.1_1198	0.417755	0.4746	0.339861	0.38849
lcl|NC_007194.1_cds_XP_752726.1_1199	0.45103	0.563466	0.376878	0.435152
lcl|NC_007194.1_cds_XP_752727.1_1200	0.451632	0.541206	0.36263	0.419746
lcl|NC_007194.1_cds_XP_752728.1_1201	0.398285	0.472575	0.312928	0.358577
lcl|NC_007194.1_cds_XP_752729.1_1202	0.361993	0.41039	0.285105	0.337154
lcl|NC_007194.1_cds_XP_752730.1_1203	0.366355	0.438378	0.287712	0.347128
lcl|NC_007194.1_cds_XP_752731.1_1204	0.390676	0.431842	0.314267	0.367392
lcl|NC_007194.1_cds_XP_752732.1_1205	0.392014	0.486957	0.297906	0.348028
lcl|NC_007194.1_cds_XP_752733.1_1206	0.34354	0.407417	0.268319	0.319357
lcl|NC_007194.1_cds_XP_752734.1_1207	0.377889	0.389285	0.294486	0.348093
lcl|NC_007194.1_cds_XP_752735.1_1208	0.357573	0.408477	0.29313	0.34505
lcl|NC_007194.1_cds_XP_752736.1_1209	0.375378	0.438794	0.302474	0.354082
lcl|NC_007194.1_cds_XP_752737.1_1210	0.447668	0.562037	0.371355	0.421635
lcl|NC_007194.1_cds_XP_752738.1_1211	0.381934	0.509545	0.300101	0.355036
lcl|NC_007194.1_cds_XP_752739.1_1212	0.370075	0.442076	0.293166	0.347933
lcl|NC_007194.1_cds_XP_752740.1_1213	0.361485	0.39918	0.292254	0.341678
lcl|NC_007194.1_cds_XP_752741.1_1214	0.444536	0.559581	0.366027	0.421598
lcl|NC_007194.1_cds_XP_752742.1_1215	0.349063	0.392128	0.275626	0.320239
lcl|NC_007194.1_cds_XP_752743.1_1216	0.393536	0.469637	0.320032	0.377509
lcl|NC_007194.1_cds_XP_752744.1_1217	0.431325	0.531676	0.343091	0.399047
lcl|NC_007194.1_cds_XP_752745.1_1218	0.374543	0.486615	0.301212	0.351915
lcl|NC_007194.1_cds_XP_752746.1_1219	0.371175	0.431379	0.298929	0.349387
lcl|NC_007194.1_cds_XP_752748.1_1220	0.561238	0.7028	0.45473	0.531155
lcl|NC_007194.1_cds_XP_752749.1_1221	0.589552	0.792057	0.470616	0.53427
lcl|NC_007194.1_cds_XP_752750.1_1222	0.435555	0.541795	0.3472	0.404661
lcl|NC_007194.1_cds_XP_752751.1_1223	0.43182	0.487961	0.347205	0.421227
lcl|NC_007194.1_cds_XP_752752.1_1224	0.350134	0.449006	0.26609	0.326246
lcl|NC_007194.1_cds_XP_752753.1_1225	0.332372	0.358071	0.254048	0.291768
lcl|NC_007194.1_cds_XP_752754.1_1226	0.347357	0.410969	0.283696	0.328013
lcl|NC_007194.1_cds_XP_752755.1_1227	0.378268	0.455912	0.296265	0.350891
lcl|NC_007194.1_cds_XP_752756.1_1228	0.396676	0.506387	0.311023	0.361059
lcl|NC_007194.1_cds_XP_752757.1_1229	0.335779	0.390313	0.258765	0.304395
lcl|NC_007194.1_cds_XP_752758.1_1230	0.383249	0.429118	0.318099	0.372412
lcl|NC_007194.1_cds_XP_752759.1_1231	0.387922	0.430512	0.321335	0.368891
lcl|NC_007194.1_cds_XP_752760.1_1232	0.421387	0.501832	0.346854	0.40528
lcl|NC_007194.1_cds_XP_752761.1_1233	0.345522	0.410119	0.269807	0.315369
lcl|NC_007194.1_cds_XP_752762.1_1234	0.338383	0.396566	0.265	0.309334
lcl|NC_007194.1_cds_XP_752763.1_1235	0.349375	0.40067	0.260559	0.313845
lcl|NC_007194.1_cds_XP_752764.1_1236	0.434408	0.585984	0.342912	0.400241
lcl|NC_007194.1_cds_XP_752765.1_1237	0.438601	0.588966	0.324223	0.381797
lcl|NC_007194.1_cds_XP_752766.1_1238	0.448494	0.583255	0.327247	0.395317
lcl|NC_007194.1_cds_XP_752767.1_1239	0.389005	0.504169	0.29906	0.35241
lcl|NC_007194.1_cds_XP_752768.1_1240	0.377339	0.496506	0.294003	0.352789
lcl|NC_007194.1_cds_XP_752769.1_1241	0.444574	0.601767	0.372271	0.421323
lcl|NC_007194.1_cds_XP_752770.1_1242	0.3722	0.463183	0.29155	0.350359
lcl|NC_007194.1_cds_XP_752771.1_1243	0.35305	0.453676	0.273182	0.331082
lcl|NC_007194.1_cds_XP_752772.1_1244	0.377645	0.422068	0.307717	0.355987
lcl|NC_007194.1_cds_XP_752773.1_1245	0.405816	0.443119	0.333816	0.383861
lcl|NC_007194.1_cds_XP_752774.1_1246	0.420428	0.567266	0.317399	0.373027
lcl|NC_007194.1_cds_XP_752775.1_1247	0.330768	0.419529	0.260031	0.30822
lcl|NC_007194.1_cds_XP_752776.1_1248	0.386805	0.457259	0.310004	0.363484
lcl|NC_007194.1_cds_XP_752777.1_1249	0.356618	0.392024	0.292983	0.337312
lcl|NC_007194.1_cds_XP_752778.1_1250	0.368347	0.455482	0.288939	0.342023
lcl|NC_007194.1_cds_XP_752779.1_1251	0.397864	0.498481	0.312202	0.365273
lcl|NC_007194.1_cds_XP_752780.1_1252	0.353976	0.420465	0.281517	0.332281
lcl|NC_007194.1_cds_XP_752781.1_1253	0.376762	0.488197	0.290391	0.348023
lcl|NC_007194.1_cds_XP_752782.1_1254	0.546445	0.683732	0.444088	0.507599
lcl|NC_007194.1_cds_XP_752783.1_1255	0.36637	0.441846	0.280343	0.336323
lcl|NC_007194.1_cds_XP_752784.1_1256	0.350211	0.418469	0.272718	0.327144
lcl|NC_007194.1_cds_XP_752785.1_1257	0.401189	0.519026	0.347279	0.403443
lcl|NC_007194.1_cds_XP_752786.1_1258	0.363038	0.446814	0.277717	0.323966
lcl|NC_007194.1_cds_XP_752787.1_1259	0.403919	0.517821	0.324387	0.380726
lcl|NC_007194.1_cds_XP_752788.1_1260	0.437844	0.523005	0.358509	0.413524
lcl|NC_007194.1_cds_XP_752789.1_1261	0.410861	0.589306	0.342058	0.3937
lcl|NC_007194.1_cds_XP_752790.1_1262	0.519174	0.71063	0.41276	0.469128
lcl|NC_007194.1_cds_XP_752791.1_1263	0.380615	0.473979	0.283446	0.340848
lcl|NC_007194.1_cds_XP_752792.1_1264	0.525362	0.66048	0.426172	0.510633
lcl|NC_007194.1_cds_XP_752793.1_1265	0.351595	0.427908	0.277076	0.3246
lcl|NC_007194.1_cds_XP_752794.1_1266	0.367015	0.441762	0.284981	0.333887
lcl|NC_007194.1_cds_XP_752795.1_1267	0.331165	0.365846	0.260576	0.309909
lcl|NC_007194.1_cds_XP_752796.1_1268	0.35504	0.412362	0.276592	0.327321
lcl|NC_007194.1_cds_XP_752797.1_1269	0.468561	0.644769	0.356814	0.426089
lcl|NC_007194.1_cds_XP_752798.1_1270	0.37657	0.468726	0.291231	0.347669
lcl|NC_007194.1_cds_XP_752799.1_1271	0.42119	0.533418	0.342059	0.407179
lcl|NC_007194.1_cds_XP_752800.1_1272	0.413816	0.570828	0.322007	0.378506
lcl|NC_007194.1_cds_XP_752801.1_1273	0.373266	0.478277	0.302377	0.350541
lcl|NC_007194.1_cds_XP_752802.1_1274	0.365053	0.431866	0.279745	0.327722
lcl|NC_007194.1_cds_XP_752803.1_1275	0.425709	0.549482	0.340887	0.398248
lcl|NC_007194.1_cds_XP_752804.1_1276	0.41677	0.573472	0.320921	0.377967
lcl|NC_007194.1_cds_XP_752805.1_1277	0.38418	0.451436	0.30152	0.355738
lcl|NC_007194.1_cds_XP_752806.2_1278	0.366011	0.438812	0.289503	0.346455
lcl|NC_007194.1_cds_XP_752808.1_1279	0.424516	0.470784	0.340285	0.401017
lcl|NC_007194.1_cds_XP_752809.1_1280	0.451547	0.607856	0.32999	0.395492
lcl|NC_007194.1_cds_XP_752810.1_1281	0.400504	0.49259	0.307978	0.362488
lcl|NC_007194.1_cds_XP_752811.1_1282	0.570834	0.79151	0.453497	0.517245
lcl|NC_007194.1_cds_XP_752812.1_1283	0.360777	0.442221	0.280605	0.330853
lcl|NC_007194.1_cds_XP_752813.1_1284	0.519865	0.749105	0.417731	0.477356
lcl|NC_007194.1_cds_XP_752814.1_1285	0.453165	0.656139	0.33951	0.400306
lcl|NC_007194.1_cds_XP_752815.1_1286	0.433266	0.569384	0.343889	0.402451
lcl|NC_007194.1_cds_XP_752816.1_1287	0.344256	0.418793	0.261983	0.313497
lcl|NC_007194.1_cds_XP_752817.1_1288	0.389041	0.45887	0.313147	0.372727
lcl|NC_007194.1_cds_XP_752818.1_1289	0.394573	0.501395	0.301691	0.366516
lcl|NC_007194.1_cds_XP_752819.1_1290	0.380287	0.503409	0.295593	0.350627
lcl|NC_007194.1_cds_XP_752820.1_1291	0.425905	0.578666	0.323779	0.388567
lcl|NC_007194.1_cds_XP_752821.1_1292	0.391511	0.508395	0.284105	0.351521
lcl|NC_007194.1_cds_XP_752822.1_1293	0.448373	0.61129	0.332208	0.394812
lcl|NC_007194.1_cds_XP_752823.1_1294	0.419669	0.567233	0.309782	0.371452
lcl|NC_007194.1_cds_XP_752824.1_1295	0.411067	0.575782	0.316236	0.37503
lcl|NC_007194.1_cds_XP_752825.1_1296	0.403355	0.544264	0.312664	0.377606
lcl|NC_007194.1_cds_XP_752826.1_1297	0.468612	0.628618	0.36466	0.426906
lcl|NC_007194.1_cds_XP_752827.1_1298	0.439806	0.541283	0.332316	0.396535
lcl|NC_007194.1_cds_XP_752828.1_1299	0.336336	0.368005	0.261908	0.306686
lcl|NC_007194.1_cds_XP_752829.1_1300	0.391417	0.443991	0.291411	0.363807
lcl|NC_007194.1_cds_XP_752830.1_1301	0.39157	0.465388	0.313057	0.374587
lcl|NC_007194.1_cds_XP_752831.1_1302	0.372925	0.441368	0.295838	0.348163
lcl|NC_007194.1_cds_XP_752832.1_1303	0.33649	0.40575	0.260163	0.310288
lcl|NC_007194.1_cds_XP_752833.1_1304	0.429354	0.486165	0.348865	0.411586
lcl|NC_007194.1_cds_XP_752834.1_1305	0.413729	0.528507	0.319648	0.381796
lcl|NC_007194.1_cds_XP_752835.1_1306	0.365966	0.438868	0.292173	0.348085
lcl|NC_007194.1_cds_XP_752836.1_1307	0.367928	0.470673	0.270846	0.321502
lcl|NC_007194.1_cds_XP_752837.1_1308	0.420207	0.507036	0.340368	0.399731
lcl|NC_007194.1_cds_XP_752839.1_1311	0.396003	0.499051	0.310297	0.363534
lcl|NC_007194.1_cds_XP_752840.1_1312	0.454581	0.60368	0.37166	0.43175
lcl|NC_007194.1_cds_XP_752841.1_1313	0.385969	0.452603	0.309986	0.365419
lcl|NC_007194.1_cds_XP_752842.1_1314	0.386338	0.470265	0.317259	0.371166
lcl|NC_007194.1_cds_XP_752843.1_1315	0.373137	0.444785	0.292855	0.346376
lcl|NC_007194.1_cds_XP_752844.1_1316	0.359278	0.432371	0.286131	0.344089
lcl|NC_007194.1_cds_XP_752846.1_1317	0.378766	0.450416	0.306587	0.36149
lcl|NC_007194.1_cds_XP_752847.1_1318	0.479551	0.540572	0.400018	0.449525
lcl|NC_007194.1_cds_XP_752848.1_1319	0.378093	0.46154	0.290139	0.350524
lcl|NC_007194.1_cds_XP_752849.1_1320	0.371523	0.484994	0.292231	0.344968
lcl|NC_007194.1_cds_XP_752850.1_1321	0.364748	0.432752	0.288922	0.341332
lcl|NC_007194.1_cds_XP_752851.1_1322	0.375074	0.523987	0.304712	0.357377
lcl|NC_007194.1_cds_XP_752852.1_1323	0.38677	0.444713	0.307458	0.363979
lcl|NC_007194.1_cds_XP_752853.1_1324	0.337169	0.41696	0.266025	0.316429
lcl|NC_007194.1_cds_XP_752854.1_1325	0.469262	0.611191	0.367367	0.430532
lcl|NC_007194.1_cds_XP_752855.1_1326	0.347886	0.413684	0.280415	0.325657
lcl|NC_007194.1_cds_XP_752856.1_1327	0.345234	0.415318	0.260215	0.305513
lcl|NC_007194.1_cds_XP_752857.1_1328	0.411282	0.511322	0.316526	0.368936
lcl|NC_007194.1_cds_XP_752858.2_1329	0.359272	0.412645	0.282947	0.333748
lcl|NC_007194.1_cds_XP_752860.2_1330	0.378933	0.445764	0.30305	0.35835
lcl|NC_007194.1_cds_XP_752861.1_1331	0.352578	0.413745	0.273705	0.327158
lcl|NC_007194.1_cds_XP_752862.1_1332	0.357382	0.493473	0.275323	0.338392
lcl|NC_007194.1_cds_XP_752863.1_1333	0.423647	0.514326	0.341689	0.394198
lcl|NC_007194.1_cds_XP_752865.1_1336	0.357481	0.401045	0.289817	0.33596
lcl|NC_007194.1_cds_XP_752866.1_1337	0.321681	0.326019	0.260538	0.305322
lcl|NC_007194.1_cds_XP_752867.1_1338	0.363297	0.407315	0.299795	0.351557
lcl|NC_007194.1_cds_XP_752868.1_1339	0.432929	0.490549	0.353764	0.415992
lcl|NC_007194.1_cds_XP_752869.1_1340	0.439775	0.577153	0.355433	0.41262
lcl|NC_007194.1_cds_XP_752870.1_1341	0.375168	0.427677	0.302973	0.356232
lcl|NC_007194.1_cds_XP_752871.1_1342	0.548427	0.720809	0.440275	0.502815
lcl|NC_007194.1_cds_XP_752872.1_1343	0.407411	0.473285	0.328169	0.380173
lcl|NC_007194.1_cds_XP_752873.1_1344	0.402649	0.493201	0.320782	0.381952
lcl|NC_007194.1_cds_XP_752874.1_1345	0.409668	0.481067	0.326701	0.379224
lcl|NC_007194.1_cds_XP_752876.1_1346	0.319723	0.3685	0.246759	0.295874
lcl|NC_007194.1_cds_XP_752877.1_1347	0.320386	0.351229	0.254472	0.29284
lcl|NC_007194.1_cds_XP_752878.1_1348	0.398416	0.493525	0.311812	0.357529
lcl|NC_007194.1_cds_XP_752879.1_1349	0.32095	0.401366	0.253494	0.301997
lcl|NC_007194.1_cds_XP_752880.1_1350	0.356685	0.400201	0.289309	0.335925
lcl|NC_007194.1_cds_XP_752881.1_1351	0.352806	0.421275	0.278104	0.318886
lcl|NC_007194.1_cds_XP_752882.1_1352	0.375144	0.464727	0.294146	0.345345
lcl|NC_007194.1_cds_XP_752883.1_1353	0.551717	0.744584	0.443932	0.516815
lcl|NC_007194.1_cds_XP_752884.1_1354	0.345557	0.412981	0.281361	0.332854
lcl|NC_007194.1_cds_XP_752885.1_1355	0.377141	0.492863	0.278802	0.333193
lcl|NC_007194.1_cds_XP_752886.1_1356	0.384338	0.515379	0.278985	0.330491
lcl|NC_007194.1_cds_XP_752887.1_1357	0.405372	0.516554	0.314433	0.365012
lcl|NC_007194.1_cds_XP_752888.1_1358	0.37854	0.471483	0.298223	0.351446
lcl|NC_007194.1_cds_XP_752889.1_1359	0.401815	0.514164	0.315079	0.373461
lcl|NC_007194.1_cds_XP_752890.1_1360	0.386316	0.517321	0.303047	0.357143
lcl|NC_007194.1_cds_XP_752891.1_1361	0.359749	0.402424	0.276117	0.319472
lcl|NC_007194.1_cds_XP_752892.1_1362	0.354945	0.410771	0.2846	0.336386
lcl|NC_007194.1_cds_XP_752893.1_1363	0.440647	0.533542	0.347464	0.404002
lcl|NC_007194.1_cds_XP_752894.1_1364	0.423636	0.576256	0.325201	0.389421
lcl|NC_007194.1_cds_XP_752895.2_1365	0.453012	0.623282	0.352436	0.411767
lcl|NC_007194.1_cds_XP_752896.1_1366	0.452213	0.582796	0.352116	0.410153
lcl|NC_007194.1_cds_XP_752897.1_1367	0.418347	0.539061	0.321187	0.375388
lcl|NC_007194.1_cds_XP_752898.1_1368	0.382639	0.478802	0.296237	0.353061
lcl|NC_007194.1_cds_XP_752899.1_1369	0.432989	0.56688	0.342324	0.3985
lcl|NC_007194.1_cds_XP_752900.1_1370	0.386925	0.47795	0.299843	0.352214
lcl|NC_007194.1_cds_XP_752901.1_1371	0.399772	0.506264	0.299262	0.354512
lcl|NC_007194.1_cds_XP_752902.1_1372	0.387929	0.459842	0.306177	0.362993
lcl|NC_007194.1_cds_XP_752903.1_1373	0.362853	0.444605	0.292611	0.342969
lcl|NC_007194.1_cds_XP_752904.1_1374	0.419929	0.491553	0.344362	0.403454
lcl|NC_007194.1_cds_XP_752905.1_1375	0.326511	0.383226	0.256999	0.305413
lcl|NC_007194.1_cds_XP_752906.1_1376	0.361638	0.407549	0.291812	0.341649
lcl|NC_007194.1_cds_XP_752907.1_1377	0.436831	0.539906	0.339281	0.392089
lcl|NC_007194.1_cds_XP_752908.1_1378	0.378692	0.474333	0.296966	0.356379
lcl|NC_007194.1_cds_XP_752909.1_1379	0.339239	0.384598	0.273164	0.328005
lcl|NC_007194.1_cds_XP_752910.2_1380	0.353279	0.457432	0.281973	0.326574
lcl|NC_007194.1_cds_XP_752911.1_1381	0.3502	0.412255	0.278768	0.330653
lcl|NC_007194.1_cds_XP_752912.1_1382	0.396039	0.504387	0.314484	0.372896
lcl|NC_007194.1_cds_XP_752913.1_1383	0.480867	0.646672	0.381462	0.451559
lcl|NC_007194.1_cds_XP_752914.1_1384	0.374176	0.436678	0.296574	0.355815
lcl|NC_007194.1_cds_XP_752915.1_1385	0.363645	0.423203	0.284642	0.340746
lcl|NC_007194.1_cds_XP_752916.1_1386	0.388287	0.468349	0.309746	0.360278
lcl|NC_007194.1_cds_XP_752917.1_1387	0.364236	0.404013	0.298966	0.347232
lcl|NC_007194.1_cds_XP_752918.1_1388	0.400115	0.508776	0.31643	0.368825
lcl|NC_007194.1_cds_XP_752919.1_1389	0.353178	0.409226	0.275371	0.325883
lcl|NC_007194.1_cds_XP_752920.1_1390	0.392755	0.458549	0.316814	0.375206
lcl|NC_007194.1_cds_XP_752921.1_1391	0.366793	0.427487	0.281663	0.337802
lcl|NC_007194.1_cds_XP_752922.1_1392	0.372289	0.443236	0.303633	0.356748
lcl|NC_007194.1_cds_XP_752923.1_1393	0.382728	0.43313	0.294947	0.35627
lcl|NC_007194.1_cds_XP_752924.1_1394	0.33018	0.378724	0.258932	0.312922
lcl|NC_007194.1_cds_XP_752925.1_1395	0.413973	0.526009	0.303913	0.374437
lcl|NC_007194.1_cds_XP_752926.1_1396	0.457676	0.658721	0.366327	0.413543
lcl|NC_007194.1_cds_XP_752927.1_1397	0.534116	0.755314	0.426518	0.492292
lcl|NC_007194.1_cds_XP_752928.1_1398	0.405653	0.496026	0.319622	0.372537
lcl|NC_007194.1_cds_XP_752929.1_1399	0.341113	0.438236	0.272921	0.313456
lcl|NC_007194.1_cds_XP_752930.1_1400	0.35455	0.369001	0.28695	0.335392
lcl|NC_007194.1_cds_XP_752931.1_1401	0.376876	0.417228	0.313108	0.361266
lcl|NC_007194.1_cds_XP_752932.1_1402	0.393768	0.431203	0.325198	0.378021
lcl|NC_007194.1_cds_XP_752933.1_1403	0.350373	0.41853	0.277907	0.330137
lcl|NC_007194.1_cds_XP_752934.1_1404	0.371024	0.468785	0.287225	0.337077
lcl|NC_007194.1_cds_XP_752935.1_1405	0.416776	0.535081	0.317632	0.385806
lcl|NC_007194.1_cds_XP_752936.1_1406	0.360506	0.434228	0.286134	0.33552
lcl|NC_007194.1_cds_XP_752937.1_1407	0.363622	0.451548	0.28076	0.337188
lcl|NC_007194.1_cds_XP_752938.1_1408	0.46728	0.591098	0.371346	0.43127
lcl|NC_007194.1_cds_XP_752939.1_1409	0.570954	0.851904	0.449157	0.51198
lcl|NC_007194.1_cds_XP_752940.1_1410	0.391004	0.520861	0.280313	0.339524
lcl|NC_007194.1_cds_XP_752941.1_1411	0.366842	0.40763	0.287833	0.333204
lcl|NC_007194.1_cds_XP_752942.1_1412	0.36115	0.417631	0.290514	0.342076
lcl|NC_007194.1_cds_XP_752943.1_1413	0.394806	0.463899	0.30914	0.364231
lcl|NC_007194.1_cds_XP_752944.1_1414	0.52478	0.690591	0.414109	0.480551
lcl|NC_007194.1_cds_XP_752945.1_1415	0.392141	0.491937	0.31986	0.365482
lcl|NC_007194.1_cds_XP_752946.1_1416	0.374118	0.459759	0.290787	0.344715
lcl|NC_007194.1_cds_XP_752947.1_1417	0.412753	0.473239	0.341111	0.40169
lcl|NC_007194.1_cds_XP_752948.1_1418	0.345792	0.437407	0.268162	0.322653
lcl|NC_007194.1_cds_XP_752949.1_1419	0.347357	0.414743	0.26845	0.319386
lcl|NC_007194.1_cds_XP_752950.1_1420	0.32217	0.375044	0.252821	0.297387
lcl|NC_007194.1_cds_XP_752951.1_1421	0.332355	0.391805	0.270481	0.317163
lcl|NC_007194.1_cds_XP_752952.1_1422	0.387741	0.448968	0.31112	0.360664
lcl|NC_007194.1_cds_XP_752953.1_1423	0.378765	0.43178	0.30113	0.369947
lcl|NC_007194.1_cds_XP_752954.1_1424	0.377581	0.450295	0.297634	0.360946
lcl|NC_007194.1_cds_XP_752955.1_1425	0.379075	0.442349	0.302588	0.355128
lcl|NC_007194.1_cds_XP_752956.1_1426	0.405885	0.523446	0.320645	0.37942
lcl|NC_007194.1_cds_XP_752957.1_1427	0.384818	0.483657	0.307825	0.355763
lcl|NC_007194.1_cds_XP_752958.1_1428	0.444359	0.582241	0.32247	0.391365
lcl|NC_007194.1_cds_XP_752959.1_1429	0.391612	0.461625	0.311318	0.365853
lcl|NC_007194.1_cds_XP_752960.1_1430	0.354053	0.440839	0.272972	0.318246
lcl|NC_007194.1_cds_XP_752961.1_1431	0.381889	0.438339	0.305558	0.365637
lcl|NC_007194.1_cds_XP_752962.1_1432	0.493768	0.653657	0.393458	0.467111
lcl|NC_007194.1_cds_XP_752963.1_1433	0.407337	0.482467	0.320037	0.374599
lcl|NC_007194.1_cds_XP_752964.1_1434	0.367361	0.423077	0.295305	0.354931
lcl|NC_007194.1_cds_XP_752965.1_1435	0.360146	0.421344	0.294612	0.34886
lcl|NC_007194.1_cds_XP_752966.1_1436	0.333167	0.348304	0.272433	0.320094
lcl|NC_007194.1_cds_XP_752967.1_1437	0.334358	0.408602	0.2611	0.306051
lcl|NC_007194.1_cds_XP_752968.1_1438	0.363193	0.401151	0.280117	0.332449
lcl|NC_007194.1_cds_XP_752969.1_1439	0.387113	0.448322	0.326306	0.385437
lcl|NC_007194.1_cds_XP_752970.1_1440	0.342362	0.408401	0.258818	0.308177
lcl|NC_007194.1_cds_XP_752971.1_1441	0.350771	0.412948	0.275018	0.330417
lcl|NC_007194.1_cds_XP_752972.1_1442	0.367315	0.455234	0.291356	0.332809
lcl|NC_007194.1_cds_XP_752973.1_1443	0.34978	0.403619	0.26999	0.316666
lcl|NC_007194.1_cds_XP_752974.1_1444	0.327862	0.375521	0.261227	0.310763
lcl|NC_007194.1_cds_XP_752975.1_1445	0.44957	0.528577	0.353965	0.408955
lcl|NC_007194.1_cds_XP_752976.1_1446	0.369503	0.407354	0.291004	0.337893
lcl|NC_007194.1_cds_XP_752977.1_1447	0.379675	0.445515	0.295981	0.358095
lcl|NC_007194.1_cds_XP_752978.1_1448	0.350825	0.383736	0.284479	0.337806
lcl|NC_007194.1_cds_XP_752979.1_1449	0.332982	0.390581	0.262827	0.311395
lcl|NC_007194.1_cds_XP_752980.1_1450	0.408172	0.472442	0.329319	0.380334
lcl|NC_007194.1_cds_XP_752981.1_1451	0.333077	0.40462	0.279067	0.330726
lcl|NC_007194.1_cds_XP_752982.1_1452	0.359993	0.437561	0.282769	0.332198
lcl|NC_007194.1_cds_XP_752983.1_1453	0.346593	0.387052	0.28959	0.338483
lcl|NC_007194.1_cds_XP_752984.1_1454	0.362248	0.43566	0.293874	0.343755
lcl|NC_007194.1_cds_XP_752985.1_1455	0.485347	0.650472	0.391973	0.439939
lcl|NC_007194.1_cds_XP_752986.1_1456	0.372708	0.439621	0.289601	0.331895
lcl|NC_007194.1_cds_XP_752987.1_1457	0.375084	0.470464	0.286715	0.339565
lcl|NC_007194.1_cds_XP_752988.1_1458	0.364096	0.46371	0.282113	0.334586
lcl|NC_007194.1_cds_XP_752989.1_1459	0.422782	0.564246	0.321751	0.379286
lcl|NC_007194.1_cds_XP_752990.1_1460	0.377289	0.476115	0.279741	0.332574
lcl|NC_007194.1_cds_XP_752991.1_1461	0.471673	0.663336	0.375017	0.437737
lcl|NC_007194.1_cds_XP_752992.1_1462	0.363532	0.412804	0.295977	0.342881
lcl|NC_007194.1_cds_XP_752993.1_1463	0.462786	0.613428	0.369184	0.428066
lcl|NC_007194.1_cds_XP_752994.1_1464	0.490268	0.641954	0.393296	0.452927
lcl|NC_007194.1_cds_XP_752995.1_1465	0.397267	0.48253	0.310813	0.364397
lcl|NC_007194.1_cds_XP_752996.1_1466	0.402836	0.469911	0.310448	0.381642
lcl|NC_007194.1_cds_XP_752997.1_1467	0.362827	0.44617	0.275943	0.315103
lcl|NC_007194.1_cds_XP_752998.1_1468	0.370937	0.463894	0.277866	0.321799
lcl|NC_007194.1_cds_XP_752999.1_1469	0.447333	0.564869	0.348332	0.408753
lcl|NC_007194.1_cds_XP_753000.1_1470	0.360501	0.459859	0.277587	0.330921
lcl|NC_007194.1_cds_XP_753001.1_1471	0.392839	0.451385	0.332659	0.384247
lcl|NC_007194.1_cds_XP_753002.1_1472	0.31173	0.369817	0.259482	0.296388
lcl|NC_007194.1_cds_XP_753003.1_1473	0.373032	0.422245	0.294003	0.350369
lcl|NC_007194.1_cds_XP_753004.1_1474	0.400625	0.520882	0.301034	0.361293
lcl|NC_007194.1_cds_XP_753005.1_1475	0.400437	0.533633	0.305016	0.362735
lcl|NC_007194.1_cds_XP_753006.1_1476	0.364988	0.451077	0.289176	0.350011
lcl|NC_007194.1_cds_XP_753007.1_1477	0.329237	0.404343	0.250432	0.293338
lcl|NC_007194.1_cds_XP_753008.1_1478	0.406901	0.515723	0.324771	0.382978
lcl|NC_007194.1_cds_XP_753009.1_1479	0.406994	0.524327	0.315922	0.376266
lcl|NC_007194.1_cds_XP_753010.1_1480	0.383581	0.474385	0.289779	0.344421
lcl|NC_007194.1_cds_XP_753011.1_1481	0.375438	0.453157	0.309662	0.356093
lcl|NC_007194.1_cds_XP_753012.1_1482	0.400882	0.477221	0.31986	0.368029
lcl|NC_007194.1_cds_XP_753013.1_1483	0.416678	0.53789	0.319299	0.376665
lcl|NC_007194.1_cds_XP_753014.1_1484	0.418053	0.548854	0.32286	0.383011
lcl|NC_007194.1_cds_XP_753015.1_1485	0.348077	0.419616	0.265027	0.312271
lcl|NC_007194.1_cds_XP_753016.1_1486	0.35202	0.423814	0.272205	0.323171
lcl|NC_007194.1_cds_XP_753017.1_1487	0.417367	0.546412	0.326022	0.378671
lcl|NC_007194.1_cds_XP_753018.2_1488	0.593132	0.77453	0.464811	0.520557
lcl|NC_007194.1_cds_XP_753019.2_1489	0.324941	0.37838	0.259129	0.308392
lcl|NC_007194.1_cds_XP_753020.1_1490	0.368687	0.419843	0.299223	0.354575
lcl|NC_007194.1_cds_XP_753021.2_1491	0.374943	0.391897	0.302289	0.355502
lcl|NC_007194.1_cds_XP_753022.2_1492	0.349203	0.382112	0.27291	0.326378
lcl|NC_007194.1_cds_XP_753023.1_1493	0.367286	0.402047	0.304413	0.349368
lcl|NC_007194.1_cds_XP_753024.2_1495	0.359468	0.401441	0.285518	0.33049
lcl|NC_007194.1_cds_XP_753025.2_1496	0.371994	0.422802	0.299612	0.34907
lcl|NC_007194.1_cds_XP_753026.1_1497	0.405619	0.552429	0.324475	0.378113
lcl|NC_007194.1_cds_XP_753027.1_1498	0.409946	0.563309	0.337685	0.394858
lcl|NC_007194.1_cds_XP_753028.1_1499	0.425361	0.487777	0.341165	0.398716
lcl|NC_007194.1_cds_XP_753029.1_1500	0.316166	0.360217	0.252365	0.294831
lcl|NC_007194.1_cds_XP_753030.1_1501	0.416114	0.49979	0.33016	0.391035
lcl|NC_007194.1_cds_XP_753032.1_1504	0.419211	0.468311	0.339329	0.398991
lcl|NC_007194.1_cds_XP_753033.1_1505	0.394159	0.485028	0.308488	0.362343
lcl|NC_007194.1_cds_XP_753034.1_1506	0.362198	0.438291	0.273802	0.324843
lcl|NC_007194.1_cds_XP_753035.1_1507	0.371701	0.433225	0.300278	0.349733
lcl|NC_007194.1_cds_XP_753036.1_1508	0.444327	0.54924	0.362161	0.419366
lcl|NC_007194.1_cds_XP_753037.1_1509	0.416411	0.524	0.332699	0.389968
lcl|NC_007194.1_cds_XP_753038.1_1510	0.455686	0.577477	0.366222	0.420747
lcl|NC_007194.1_cds_XP_753039.1_1511	0.324213	0.361659	0.258478	0.297027
lcl|NC_007194.1_cds_XP_753040.1_1512	0.419606	0.525884	0.334051	0.393632
lcl|NC_007194.1_cds_XP_753041.1_1513	0.415132	0.50613	0.329019	0.402616
lcl|NC_007194.1_cds_XP_753042.1_1514	0.361231	0.4222	0.285737	0.338267
lcl|NC_007194.1_cds_XP_753043.1_1515	0.402666	0.499558	0.311735	0.366228
lcl|NC_007194.1_cds_XP_753044.2_1516	0.385316	0.414809	0.287448	0.361282
lcl|NC_007194.1_cds_XP_753045.1_1517	0.344651	0.408666	0.258735	0.304814
lcl|NC_007194.1_cds_XP_753046.1_1518	0.380687	0.471841	0.301371	0.351535
lcl|NC_007194.1_cds_XP_753047.1_1519	0.342465	0.369993	0.271369	0.313548
lcl|NC_007194.1_cds_XP_753048.1_1520	0.381093	0.420111	0.304621	0.359962
lcl|NC_007194.1_cds_XP_753049.1_1521	0.405984	0.487919	0.315565	0.371898
lcl|NC_007194.1_cds_XP_753050.1_1522	0.438791	0.499084	0.36188	0.418066
lcl|NC_007194.1_cds_XP_753051.1_1523	0.357109	0.418279	0.282571	0.331793
lcl|NC_007194.1_cds_XP_753052.1_1524	0.584692	0.804846	0.477941	0.556666
lcl|NC_007194.1_cds_XP_753053.1_1525	0.373615	0.456693	0.298037	0.350637
lcl|NC_007194.1_cds_XP_753054.1_1526	0.387042	0.496739	0.303753	0.352533
lcl|NC_007194.1_cds_XP_753055.1_1527	0.33703	0.394407	0.261894	0.315232
lcl|NC_007194.1_cds_XP_753056.1_1528	0.36257	0.430715	0.282113	0.331011
lcl|NC_007194.1_cds_XP_753057.1_1529	0.342735	0.42575	0.259867	0.311312
[truncated: 8,100 more rows]

## Sheet: Saccharomyces cerevisiae
gene id	gtAI	CAI	StAI	tAI
[truncated: 6,008 more rows]
