# Supplementary material for: gtAI: an improved species-specific tRNA adaptation index using the genetic algorithm
Source: Front Mol Biosci. 2023 Jul 4;10:1218518. doi: 10.3389/fmolb.2023.1218518 (PMC10352787; doi:10.3389/fmolb.2023.1218518)
Supplement: Supplementary file 6 [file Table1.XLSX]

## Sheet: Table S1
Table S1: The taxonomic information of the 12 model organisms used in the study.
Organism	RefSeq/BioProject	Taxonomy ID	Lineage
Archaea
Ferroglobus placidus	RefSeq: NC_013849.1	54261	cellular organisms; Archaea; Euryarchaeota; Archaeoglobi; Archaeoglobales; Archaeoglobaceae; Ferroglobus
Halomicrobium mukohataei	RefSeq: NC_013202.1	57705	cellular organisms; Archaea; Euryarchaeota; Stenosarchaea group; Halobacteria; Halobacteriales; Haloarculaceae; Halomicrobium
Methanocaldococcus jannaschii	RefSeq: NC_000909.1	2190	cellular organisms; Archaea; Euryarchaeota; Methanomada group; Methanococci; Methanococcales; Methanocaldococcaceae; Methanocaldococcus
Bacteria
Escherichia coli	RefSeq: NZ_CP014225.1/CP014225.1	562	cellular organisms; Bacteria; Proteobacteria; Gammaproteobacteria; Enterobacterales; Enterobacteriaceae; Escherichia
Neisseria meningitidis	RefSeq: NC_003116.1/AL157959.1	487	cellular organisms; Bacteria; Proteobacteria; Betaproteobacteria; Neisseriales; Neisseriaceae; Neisseria
Vibrio cholerae	RefSeq: chromosome I: NC_012582.1/CP001235.1	666	cellular organisms; Bacteria; Proteobacteria; Gammaproteobacteria; Vibrionales; Vibrionaceae; Vibrio
Eukarya (Non-fungal)
Caenorhabditis elegans	BioProject: PRJNA13758	6239	cellular organisms; Eukaryota; Opisthokonta; Metazoa; Eumetazoa; Bilateria; Protostomia; Ecdysozoa; Nematoda; Chromadorea; Rhabditida; Rhabditina; Rhabditomorpha; Rhabditoidea; Rhabditidae; Peloderinae; Caenorhabditis
Drosophila melanogaster	BioProject: PRJNA13669	7227	cellular organisms; Eukaryota; Opisthokonta; Metazoa; Eumetazoa; Bilateria; Protostomia; Ecdysozoa; Panarthropoda; Arthropoda; Mandibulata; Pancrustacea; Hexapoda; Insecta; Dicondylia; Pterygota; Neoptera; Holometabola; Diptera; Brachycera; Muscomorpha; Eremoneura; Cyclorrhapha; Schizophora; Acalyptratae; Ephydroidea; Drosophilidae; Drosophilinae; Drosophilini; Drosophila; Sophophora; melanogaste…
Eukarya (Fungal)
Aspergillus fumigatus	BioProject: PRJNA131	746128	cellular organisms; Eukaryota; Opisthokonta; Fungi; Dikarya; Ascomycota; saccharomyceta; Pezizomycotina; leotiomyceta; Eurotiomycetes; Eurotiomycetidae; Eurotiales; Aspergillaceae; Aspergillus
Aspergillus nidulans	chromosome I: GenBank: BN001301.1	162425	cellular organisms; Eukaryota; Opisthokonta; Fungi; Dikarya; Ascomycota; saccharomyceta; Pezizomycotina; leotiomyceta; Eurotiomycetes; Eurotiomycetidae; Eurotiales; Aspergillaceae; Aspergillus
Saccharomyces cerevisiae	BioProject: PRJNA43747	4932	cellular organisms; Eukaryota; Opisthokonta; Fungi; Dikarya; Ascomycota; saccharomyceta; Saccharomycotina; Saccharomycetes; Saccharomycetales; Saccharomycetaceae; Saccharomyces
Schizosaccharomyces pombe	BioProject: PRJNA13836	4896	cellular organisms; Eukaryota; Opisthokonta; Fungi; Dikarya; Ascomycota; Taphrinomycotina; Schizosaccharomycetes; Schizosaccharomycetales; Schizosaccharomycetaceae; Schizosaccharomyces
