# Supplementary material for: gtAI: an improved species-specific tRNA adaptation index using the genetic algorithm
Source: Front Mol Biosci. 2023 Jul 4;10:1218518. doi: 10.3389/fmolb.2023.1218518 (PMC10352787; doi:10.3389/fmolb.2023.1218518)
Supplement: Supplementary file 8 [file Table5.XLSX]

## Sheet: Caenorhabditis elegans
gene id	gtAI	CAI	StAI
lcl|NC_001328.1_cds_NP_006953.1_30153	0.199533	0.422654	0.272604
lcl|NC_001328.1_cds_NP_006954.1_30154	0.210188	0.420666	0.283219
lcl|NC_001328.1_cds_NP_006955.1_30155	0.248897	0.488575	0.30481
lcl|NC_001328.1_cds_NP_006956.1_30156	0.255427	0.513565	0.313652
lcl|NC_001328.1_cds_NP_006957.1_30157	0.235802	0.482228	0.293721
lcl|NC_001328.1_cds_NP_006958.1_30158	0.217171	0.414351	0.273486
lcl|NC_001328.1_cds_NP_006959.1_30159	0.224734	0.462306	0.291797
lcl|NC_001328.1_cds_NP_006960.1_30160	0.21381	0.427333	0.272331
lcl|NC_001328.1_cds_NP_006961.1_30161	0.233588	0.450494	0.293292
lcl|NC_001328.1_cds_NP_006962.1_30162	0.227566	0.47803	0.29595
lcl|NC_001328.1_cds_NP_006963.1_30163	0.227086	0.440687	0.277479
lcl|NC_001328.1_cds_NP_006964.1_30164	0.202809	0.422301	0.266084
lcl|NC_003279.8_cds_1029	0.320216	0.568315	0.348213
lcl|NC_003279.8_cds_1222	0.374239	0.625703	0.399328
lcl|NC_003279.8_cds_1404	0.350333	0.584345	0.386362
lcl|NC_003279.8_cds_1515	0.317098	0.57643	0.3573
lcl|NC_003279.8_cds_1517	0.308073	0.567519	0.359896
lcl|NC_003279.8_cds_1848	0.369144	0.597567	0.399289
lcl|NC_003279.8_cds_1936	0.323235	0.561256	0.353593
lcl|NC_003279.8_cds_1946	0.316345	0.567731	0.355944
lcl|NC_003279.8_cds_1953	0.315572	0.57049	0.36409
lcl|NC_003279.8_cds_1965	0.300498	0.554341	0.338155
lcl|NC_003279.8_cds_1969	0.308418	0.543371	0.329499
lcl|NC_003279.8_cds_2166	0.318772	0.569475	0.352788
lcl|NC_003279.8_cds_2182	0.304423	0.600171	0.371952
lcl|NC_003279.8_cds_2183	0.343645	0.574251	0.391409
lcl|NC_003279.8_cds_2215	0.31165	0.603934	0.361619
lcl|NC_003279.8_cds_2377	0.316349	0.530528	0.362379
lcl|NC_003279.8_cds_2691	0.33805	0.55077	0.377349
lcl|NC_003279.8_cds_2763	0.340256	0.593573	0.374141
lcl|NC_003279.8_cds_2803	0.323772	0.50023	0.348242
lcl|NC_003279.8_cds_2941	0.346704	0.459301	0.390781
lcl|NC_003279.8_cds_2961	0.343011	0.593532	0.368492
lcl|NC_003279.8_cds_2963	0.358461	0.637857	0.400506
lcl|NC_003279.8_cds_2971	0.289523	0.467275	0.326149
lcl|NC_003279.8_cds_2977	0.246359	0.451253	0.281397
lcl|NC_003279.8_cds_3032	0.310228	0.597912	0.361352
lcl|NC_003279.8_cds_3060	0.300837	0.590524	0.349232
lcl|NC_003279.8_cds_3153	0.313156	0.565614	0.343532
lcl|NC_003279.8_cds_3206	0.289555	0.508938	0.343642
lcl|NC_003279.8_cds_3222	0.260003	0.460286	0.292412
lcl|NC_003279.8_cds_3256	0.302667	0.558768	0.36321
lcl|NC_003279.8_cds_3263	0.302528	0.541063	0.349518
lcl|NC_003279.8_cds_3265	0.286892	0.524174	0.320699
lcl|NC_003279.8_cds_3266	0.358968	0.602233	0.379139
lcl|NC_003279.8_cds_3273	0.320198	0.514363	0.347877
lcl|NC_003279.8_cds_3312	0.296791	0.526134	0.342349
lcl|NC_003279.8_cds_3316	0.327183	0.550332	0.355266
lcl|NC_003279.8_cds_3318	0.348805	0.607326	0.387025
lcl|NC_003279.8_cds_3332	0.340493	0.588882	0.374127
lcl|NC_003279.8_cds_335	0.29938	0.571733	0.343445
lcl|NC_003279.8_cds_3356	0.487051	0.726978	0.516114
lcl|NC_003279.8_cds_3383	0.27772	0.472116	0.310521
lcl|NC_003279.8_cds_3384	0.285569	0.480353	0.32397
lcl|NC_003279.8_cds_3393	0.298831	0.51566	0.358827
lcl|NC_003279.8_cds_3402	0.293549	0.528601	0.334102
lcl|NC_003279.8_cds_3404	0.30555	0.550953	0.344522
lcl|NC_003279.8_cds_3406	0.325544	0.583615	0.371708
lcl|NC_003279.8_cds_3408	0.316772	0.539896	0.362225
lcl|NC_003279.8_cds_3409	0.335974	0.53288	0.362936
lcl|NC_003279.8_cds_3441	0.317041	0.572194	0.349838
lcl|NC_003279.8_cds_3455	0.318004	0.548307	0.362224
lcl|NC_003279.8_cds_3458	0.32937	0.610353	0.373105
lcl|NC_003279.8_cds_3459	0.298369	0.536526	0.33066
lcl|NC_003279.8_cds_3473	0.282672	0.479252	0.312618
lcl|NC_003279.8_cds_3474	0.297614	0.494433	0.332738
lcl|NC_003279.8_cds_3480	0.33525	0.580784	0.373721
lcl|NC_003279.8_cds_3481	0.339719	0.597153	0.384875
lcl|NC_003279.8_cds_3482	0.326959	0.597881	0.37325
lcl|NC_003279.8_cds_3499	0.353659	0.575363	0.37986
lcl|NC_003279.8_cds_3507	0.30638	0.548358	0.344322
lcl|NC_003279.8_cds_3509	0.298138	0.491583	0.35736
lcl|NC_003279.8_cds_3513	0.301742	0.530596	0.353671
lcl|NC_003279.8_cds_3521	0.28147	0.525255	0.331236
lcl|NC_003279.8_cds_3523	0.320669	0.537695	0.371825
lcl|NC_003279.8_cds_3551	0.283401	0.512974	0.337139
lcl|NC_003279.8_cds_3553	0.305101	0.503954	0.354977
lcl|NC_003279.8_cds_3559	0.288961	0.577581	0.327895
lcl|NC_003279.8_cds_3561	0.306748	0.502209	0.35241
lcl|NC_003279.8_cds_3584	0.27959	0.47858	0.316527
lcl|NC_003279.8_cds_3613	0.297039	0.528326	0.343906
lcl|NC_003279.8_cds_3625	0.286466	0.513451	0.32024
lcl|NC_003279.8_cds_363	0.302641	0.577024	0.340029
lcl|NC_003279.8_cds_3676	0.30023	0.537819	0.345306
lcl|NC_003279.8_cds_3680	0.282279	0.510061	0.324346
lcl|NC_003279.8_cds_3681	0.322599	0.568351	0.359566
lcl|NC_003279.8_cds_3686	0.294555	0.546022	0.344076
lcl|NC_003279.8_cds_3689	0.294555	0.546022	0.344076
lcl|NC_003279.8_cds_3691	0.279515	0.496559	0.321436
lcl|NC_003279.8_cds_3692	0.285683	0.498739	0.333105
lcl|NC_003279.8_cds_3693	0.27991	0.492484	0.313861
lcl|NC_003279.8_cds_3694	0.32624	0.607972	0.373341
lcl|NC_003279.8_cds_3700	0.295619	0.540671	0.324108
lcl|NC_003279.8_cds_3709	0.320269	0.578159	0.354211
lcl|NC_003279.8_cds_3712	0.378239	0.641607	0.410757
lcl|NC_003279.8_cds_3714	0.286685	0.564022	0.329001
lcl|NC_003279.8_cds_3716	0.270733	0.54009	0.306467
lcl|NC_003279.8_cds_3721	0.339653	0.606645	0.381606
lcl|NC_003279.8_cds_3730	0.290954	0.484365	0.321665
lcl|NC_003279.8_cds_3737	0.285315	0.527343	0.34572
lcl|NC_003279.8_cds_3762	0.31169	0.535312	0.355331
lcl|NC_003279.8_cds_3763	0.349955	0.642792	0.387696
lcl|NC_003279.8_cds_3767	0.30404	0.536306	0.337294
lcl|NC_003279.8_cds_3811	0.316623	0.517883	0.360927
lcl|NC_003279.8_cds_3812	0.302333	0.578378	0.342404
lcl|NC_003279.8_cds_3815	0.301588	0.536417	0.355906
lcl|NC_003279.8_cds_3816	0.293688	0.496994	0.343716
lcl|NC_003279.8_cds_3817	0.300616	0.514775	0.348835
lcl|NC_003279.8_cds_3818	0.321769	0.555615	0.35872
lcl|NC_003279.8_cds_3819	0.287435	0.567906	0.346715
lcl|NC_003279.8_cds_3820	0.269913	0.53081	0.332583
lcl|NC_003279.8_cds_3832	0.339096	0.594872	0.370705
lcl|NC_003279.8_cds_3836	0.347493	0.57735	0.371611
lcl|NC_003279.8_cds_3844	0.300836	0.534171	0.330637
lcl|NC_003279.8_cds_3864	0.304053	0.522731	0.358456
lcl|NC_003279.8_cds_3865	0.299366	0.499619	0.346124
lcl|NC_003279.8_cds_3869	0.272684	0.404226	0.317767
lcl|NC_003279.8_cds_3870	0.317575	0.558987	0.348058
lcl|NC_003279.8_cds_3878	0.291089	0.565735	0.34553
lcl|NC_003279.8_cds_3880	0.325637	0.598792	0.370148
lcl|NC_003279.8_cds_3885	0.305922	0.55098	0.346708
lcl|NC_003279.8_cds_3929	0.295821	0.523032	0.334529
lcl|NC_003279.8_cds_3969	0.294625	0.534444	0.330525
lcl|NC_003279.8_cds_3978	0.310659	0.522522	0.362621
lcl|NC_003279.8_cds_3987	0.288159	0.516242	0.325343
lcl|NC_003279.8_cds_4001	0.268034	0.490993	0.301129
lcl|NC_003279.8_cds_4012	0.283027	0.489473	0.315533
lcl|NC_003279.8_cds_4038	0.30254	0.507116	0.343346
lcl|NC_003279.8_cds_4039	0.300444	0.501616	0.339906
lcl|NC_003279.8_cds_4040	0.342024	0.547398	0.373885
lcl|NC_003279.8_cds_4041	0.281049	0.474106	0.315073
lcl|NC_003279.8_cds_4042	0.350536	0.634801	0.382874
lcl|NC_003279.8_cds_4047	0.292927	0.518204	0.328559
lcl|NC_003279.8_cds_4061	0.300471	0.495125	0.336865
lcl|NC_003279.8_cds_4065	0.296056	0.48888	0.345453
lcl|NC_003279.8_cds_4075	0.300221	0.542371	0.335665
lcl|NC_003279.8_cds_4128	0.312172	0.561271	0.358067
lcl|NC_003279.8_cds_4151	0.310413	0.571078	0.352288
lcl|NC_003279.8_cds_4215	0.358767	0.59173	0.383171
lcl|NC_003279.8_cds_4261	0.284643	0.529899	0.333048
lcl|NC_003279.8_cds_4262	0.285112	0.534443	0.330906
lcl|NC_003279.8_cds_4263	0.286386	0.532741	0.339365
lcl|NC_003279.8_cds_430	0.319891	0.551496	0.359221
lcl|NC_003279.8_cds_4303	0.307313	0.420262	0.329704
lcl|NC_003279.8_cds_443	0.289636	0.51313	0.335569
lcl|NC_003279.8_cds_52	0.341058	0.584359	0.372005
lcl|NC_003279.8_cds_55	0.35035	0.556352	0.369388
lcl|NC_003279.8_cds_56	0.334872	0.553976	0.366848
lcl|NC_003279.8_cds_565	0.469236	0.808695	0.44178
lcl|NC_003279.8_cds_58	0.301746	0.562231	0.34522
lcl|NC_003279.8_cds_59	0.330514	0.553661	0.363104
lcl|NC_003279.8_cds_591	0.287773	0.506592	0.324161
lcl|NC_003279.8_cds_592	0.279409	0.49777	0.309797
lcl|NC_003279.8_cds_593	0.317555	0.567313	0.35105
lcl|NC_003279.8_cds_594	0.334652	0.557616	0.362976
lcl|NC_003279.8_cds_608	0.293176	0.538965	0.340824
lcl|NC_003279.8_cds_609	0.279684	0.529783	0.334324
lcl|NC_003279.8_cds_613	0.399087	0.602377	0.434693
lcl|NC_003279.8_cds_638	0.314773	0.523415	0.355496
lcl|NC_003279.8_cds_639	0.303894	0.506081	0.334328
lcl|NC_003279.8_cds_641	0.305243	0.50942	0.34787
lcl|NC_003279.8_cds_693	0.301566	0.552367	0.334888
lcl|NC_003279.8_cds_77	0.326376	0.552098	0.364508
lcl|NC_003279.8_cds_8	0.29954	0.485813	0.324706
lcl|NC_003279.8_cds_832	0.29163	0.522123	0.335303
lcl|NC_003279.8_cds_86	0.31993	0.547754	0.358821
lcl|NC_003279.8_cds_870	0.302813	0.512702	0.334247
lcl|NC_003279.8_cds_NP_001020953.1_1614	0.337281	0.601923	0.374009
lcl|NC_003279.8_cds_NP_001020954.1_1613	0.331116	0.597262	0.369944
lcl|NC_003279.8_cds_NP_001020957.2_1193	0.344213	0.563465	0.410505
lcl|NC_003279.8_cds_NP_001020958.1_1197	0.364055	0.641534	0.399797
lcl|NC_003279.8_cds_NP_001020959.1_3132	0.351738	0.581366	0.402118
lcl|NC_003279.8_cds_NP_001020960.1_3128	0.267137	0.496601	0.313513
lcl|NC_003279.8_cds_NP_001020961.1_3127	0.261065	0.491963	0.305786
lcl|NC_003279.8_cds_NP_001020962.1_1595	0.336924	0.61471	0.364526
lcl|NC_003279.8_cds_NP_001020963.1_1594	0.335198	0.617833	0.36734
lcl|NC_003279.8_cds_NP_001020964.1_1596	0.346773	0.640314	0.374701
lcl|NC_003279.8_cds_NP_001020965.1_1586	0.301686	0.527756	0.344769
lcl|NC_003279.8_cds_NP_001020966.2_1585	0.300291	0.532369	0.349428
lcl|NC_003279.8_cds_NP_001020968.1_1369	0.413107	0.710322	0.445774
lcl|NC_003279.8_cds_NP_001020972.1_1533	0.311806	0.588827	0.347973
lcl|NC_003279.8_cds_NP_001020975.1_2001	0.341226	0.589981	0.385403
lcl|NC_003279.8_cds_NP_001020976.1_2003	0.342023	0.592465	0.38692
lcl|NC_003279.8_cds_NP_001020977.1_2000	0.343618	0.589245	0.387777
lcl|NC_003279.8_cds_NP_001020979.1_2795	0.35034	0.603246	0.391484
lcl|NC_003279.8_cds_NP_001020980.1_2796	0.351361	0.604312	0.393835
lcl|NC_003279.8_cds_NP_001020982.2_1603	0.344575	0.639296	0.384475
lcl|NC_003279.8_cds_NP_001020983.1_99	0.312399	0.551667	0.344953
lcl|NC_003279.8_cds_NP_001020984.1_1012	0.422307	0.704033	0.448326
lcl|NC_003279.8_cds_NP_001020985.1_1007	0.413505	0.692899	0.440626
lcl|NC_003279.8_cds_NP_001020988.1_1015	0.420738	0.712957	0.447387
lcl|NC_003279.8_cds_NP_001020989.1_1011	0.411521	0.698989	0.439228
lcl|NC_003279.8_cds_NP_001020991.1_1441	0.335645	0.574321	0.376121
lcl|NC_003279.8_cds_NP_001020992.1_1442	0.340894	0.603629	0.383577
lcl|NC_003279.8_cds_NP_001020993.1_2277	0.32577	0.582349	0.374002
lcl|NC_003279.8_cds_NP_001020994.1_2278	0.326078	0.58264	0.374125
lcl|NC_003279.8_cds_NP_001020996.1_2279	0.322695	0.519021	0.364514
lcl|NC_003279.8_cds_NP_001020998.1_2675	0.356365	0.619711	0.397138
lcl|NC_003279.8_cds_NP_001020999.1_2674	0.356602	0.619331	0.397258
lcl|NC_003279.8_cds_NP_001021001.1_2699	0.310451	0.58124	0.358458
lcl|NC_003279.8_cds_NP_001021002.1_3840	0.350315	0.617328	0.393956
lcl|NC_003279.8_cds_NP_001021003.1_3833	0.333522	0.575431	0.379343
lcl|NC_003279.8_cds_NP_001021004.1_2951	0.42915	0.684397	0.444965
lcl|NC_003279.8_cds_NP_001021005.1_2950	0.407753	0.659554	0.427713
lcl|NC_003279.8_cds_NP_001021008.1_2099	0.351464	0.594598	0.389094
lcl|NC_003279.8_cds_NP_001021009.1_2100	0.344002	0.556933	0.385684
lcl|NC_003279.8_cds_NP_001021011.1_2106	0.327712	0.59949	0.360872
lcl|NC_003279.8_cds_NP_001021012.1_1624	0.380077	0.63762	0.409218
lcl|NC_003279.8_cds_NP_001021013.1_2581	0.34632	0.617047	0.393985
lcl|NC_003279.8_cds_NP_001021014.1_931	0.364221	0.634246	0.404966
lcl|NC_003279.8_cds_NP_001021015.1_929	0.352179	0.628663	0.388913
lcl|NC_003279.8_cds_NP_001021016.1_932	0.362803	0.632912	0.403867
lcl|NC_003279.8_cds_NP_001021017.1_925	0.513862	0.83908	0.504147
lcl|NC_003279.8_cds_NP_001021021.1_1539	0.417175	0.73511	0.448
lcl|NC_003279.8_cds_NP_001021022.1_1540	0.414994	0.73405	0.449483
lcl|NC_003279.8_cds_NP_001021023.1_2491	0.335421	0.594333	0.372467
lcl|NC_003279.8_cds_NP_001021024.1_2492	0.334773	0.594165	0.372079
lcl|NC_003279.8_cds_NP_001021025.1_2490	0.33585	0.59355	0.373111
lcl|NC_003279.8_cds_NP_001021026.1_2480	0.272901	0.529135	0.327702
lcl|NC_003279.8_cds_NP_001021027.1_1876	0.351489	0.642042	0.394223
lcl|NC_003279.8_cds_NP_001021028.1_1877	0.351957	0.641642	0.394559
lcl|NC_003279.8_cds_NP_001021029.1_1872	0.347108	0.574245	0.378088
lcl|NC_003279.8_cds_NP_001021034.1_2728	0.349726	0.592332	0.389593
lcl|NC_003279.8_cds_NP_001021036.1_2735	0.319587	0.58187	0.359812
lcl|NC_003279.8_cds_NP_001021037.1_2736	0.323119	0.594182	0.363659
lcl|NC_003279.8_cds_NP_001021041.1_1075	0.362478	0.616746	0.399617
lcl|NC_003279.8_cds_NP_001021042.2_770	0.3129	0.534816	0.34389
lcl|NC_003279.8_cds_NP_001021043.2_771	0.314731	0.534843	0.34501
lcl|NC_003279.8_cds_NP_001021044.1_2641	0.347132	0.648021	0.388543
lcl|NC_003279.8_cds_NP_001021045.1_1307	0.313731	0.595008	0.357889
lcl|NC_003279.8_cds_NP_001021046.1_1308	0.30703	0.579334	0.351218
lcl|NC_003279.8_cds_NP_001021047.1_1301	0.31952	0.540167	0.356306
lcl|NC_003279.8_cds_NP_001021048.1_1300	0.313024	0.5026	0.349146
lcl|NC_003279.8_cds_NP_001021049.1_1297	0.323265	0.518719	0.359718
lcl|NC_003279.8_cds_NP_001021050.1_3783	0.503605	0.868322	0.493834
lcl|NC_003279.8_cds_NP_001021051.1_3788	0.377018	0.646754	0.411134
lcl|NC_003279.8_cds_NP_001021052.1_3787	0.377013	0.646702	0.410908
lcl|NC_003279.8_cds_NP_001021053.1_1912	0.333495	0.603329	0.372162
lcl|NC_003279.8_cds_NP_001021054.1_1911	0.3324	0.599439	0.371964
lcl|NC_003279.8_cds_NP_001021055.1_4110	0.331381	0.549393	0.364725
lcl|NC_003279.8_cds_NP_001021056.1_4111	0.334802	0.558144	0.367712
lcl|NC_003279.8_cds_NP_001021061.1_3624	0.370983	0.619776	0.407813
lcl|NC_003279.8_cds_NP_001021067.1_1166	0.304445	0.551551	0.343021
lcl|NC_003279.8_cds_NP_001021068.1_1164	0.293354	0.532879	0.329521
lcl|NC_003279.8_cds_NP_001021069.1_1165	0.281442	0.500001	0.317471
lcl|NC_003279.8_cds_NP_001021070.2_1158	0.320571	0.510784	0.350273
lcl|NC_003279.8_cds_NP_001021071.1_1160	0.316735	0.54889	0.350138
lcl|NC_003279.8_cds_NP_001021072.1_1161	0.31093	0.538406	0.347356
lcl|NC_003279.8_cds_NP_001021074.1_2134	0.297996	0.572484	0.344502
lcl|NC_003279.8_cds_NP_001021075.1_2123	0.314948	0.568264	0.340651
lcl|NC_003279.8_cds_NP_001021076.1_2118	0.35109	0.606785	0.389362
lcl|NC_003279.8_cds_NP_001021077.1_2119	0.36844	0.633411	0.400571
lcl|NC_003279.8_cds_NP_001021080.1_2494	0.350877	0.610964	0.381686
lcl|NC_003279.8_cds_NP_001021081.1_1031	0.2973	0.523663	0.34599
lcl|NC_003279.8_cds_NP_001021083.1_2373	0.342914	0.631197	0.387438
lcl|NC_003279.8_cds_NP_001021084.1_2372	0.348357	0.634031	0.389956
lcl|NC_003279.8_cds_NP_001021085.1_2365	0.314761	0.553	0.362309
lcl|NC_003279.8_cds_NP_001021087.1_2300	0.311218	0.559613	0.358012
lcl|NC_003279.8_cds_NP_001021088.1_2294	0.283551	0.523499	0.322728
lcl|NC_003279.8_cds_NP_001021089.1_3771	0.367056	0.63409	0.401557
lcl|NC_003279.8_cds_NP_001021090.1_3773	0.367729	0.642001	0.401678
lcl|NC_003279.8_cds_NP_001021092.1_1871	0.432926	0.731203	0.459865
lcl|NC_003279.8_cds_NP_001021093.1_1870	0.480642	0.815377	0.498614
lcl|NC_003279.8_cds_NP_001021097.1_2912	0.312267	0.574499	0.364108
lcl|NC_003279.8_cds_NP_001021098.1_2911	0.313036	0.562025	0.360702
lcl|NC_003279.8_cds_NP_001021102.1_2035	0.322998	0.577773	0.366806
lcl|NC_003279.8_cds_NP_001021103.1_2043	0.310349	0.543199	0.344764
lcl|NC_003279.8_cds_NP_001021104.1_2044	0.311249	0.545344	0.345832
lcl|NC_003279.8_cds_NP_001021106.1_2661	0.380596	0.665823	0.414166
lcl|NC_003279.8_cds_NP_001021107.1_2660	0.372875	0.656217	0.411324
lcl|NC_003279.8_cds_NP_001021108.1_3544	0.297561	0.528329	0.334599
lcl|NC_003279.8_cds_NP_001021388.1_2686	0.324963	0.590642	0.364847
lcl|NC_003279.8_cds_NP_001021389.1_2685	0.328807	0.599694	0.368731
lcl|NC_003279.8_cds_NP_001021390.1_2687	0.313681	0.566349	0.355241
lcl|NC_003279.8_cds_NP_001021391.2_2935	0.303526	0.534967	0.341982
lcl|NC_003279.8_cds_NP_001021392.1_2936	0.365015	0.636612	0.407286
lcl|NC_003279.8_cds_NP_001021393.2_3860	0.326128	0.54683	0.353875
lcl|NC_003279.8_cds_NP_001021395.1_2275	0.331354	0.609146	0.372639
lcl|NC_003279.8_cds_NP_001021396.1_2272	0.324831	0.607863	0.364305
lcl|NC_003279.8_cds_NP_001021398.1_2030	0.314222	0.59858	0.361163
lcl|NC_003279.8_cds_NP_001021399.1_2029	0.314718	0.599874	0.361742
lcl|NC_003279.8_cds_NP_001021401.1_1258	0.323099	0.516286	0.363698
lcl|NC_003279.8_cds_NP_001021404.1_1968	0.324803	0.559881	0.371395
lcl|NC_003279.8_cds_NP_001021405.1_1960	0.401736	0.707123	0.435212
lcl|NC_003279.8_cds_NP_001021407.2_2633	0.314841	0.579384	0.371871
lcl|NC_003279.8_cds_NP_001021408.2_2636	0.294665	0.571413	0.36297
lcl|NC_003279.8_cds_NP_001021409.2_2635	0.306324	0.581501	0.367252
lcl|NC_003279.8_cds_NP_001021410.2_2632	0.321792	0.595352	0.378666
lcl|NC_003279.8_cds_NP_001021411.1_2626	0.443663	0.789805	0.469294
lcl|NC_003279.8_cds_NP_001021412.1_2624	0.442098	0.783426	0.467051
lcl|NC_003279.8_cds_NP_001021418.1_1425	0.319637	0.558667	0.358396
lcl|NC_003279.8_cds_NP_001021419.1_1424	0.318337	0.557794	0.357788
lcl|NC_003279.8_cds_NP_001021420.1_1423	0.473387	0.781621	0.470658
lcl|NC_003279.8_cds_NP_001021421.1_1422	0.460493	0.755542	0.460668
lcl|NC_003279.8_cds_NP_001021422.1_2167	0.326725	0.567739	0.362736
lcl|NC_003279.8_cds_NP_001021423.1_1272	0.309321	0.514676	0.354308
lcl|NC_003279.8_cds_NP_001021424.1_3242	0.285958	0.478594	0.325226
lcl|NC_003279.8_cds_NP_001021425.1_3243	0.287513	0.487462	0.325293
lcl|NC_003279.8_cds_NP_001021426.1_991	0.347988	0.577461	0.383451
lcl|NC_003279.8_cds_NP_001021427.1_992	0.347604	0.600852	0.384779
lcl|NC_003279.8_cds_NP_001021429.1_2714	0.36262	0.640021	0.407395
lcl|NC_003279.8_cds_NP_001021430.1_2718	0.384243	0.625514	0.415848
lcl|NC_003279.8_cds_NP_001021433.1_4317	0.349064	0.581655	0.384857
lcl|NC_003279.8_cds_NP_001021434.1_4316	0.349471	0.582343	0.38516
lcl|NC_003279.8_cds_NP_001021435.1_4322	0.329421	0.559212	0.369544
lcl|NC_003279.8_cds_NP_001021436.1_4269	0.37965	0.59477	0.405875
lcl|NC_003279.8_cds_NP_001021437.1_4271	0.367027	0.580807	0.393615
lcl|NC_003279.8_cds_NP_001021438.1_4270	0.380198	0.595127	0.405889
lcl|NC_003279.8_cds_NP_001021439.1_4267	0.3512	0.53108	0.375746
lcl|NC_003279.8_cds_NP_001021440.2_3340	0.362029	0.585063	0.40013
lcl|NC_003279.8_cds_NP_001021441.1_3344	0.339004	0.559305	0.379303
lcl|NC_003279.8_cds_NP_001021442.1_2553	0.285301	0.54872	0.332723
lcl|NC_003279.8_cds_NP_001021443.1_3669	0.330657	0.546136	0.368441
lcl|NC_003279.8_cds_NP_001021444.1_3668	0.331683	0.547937	0.369152
lcl|NC_003279.8_cds_NP_001021445.1_3672	0.329783	0.537598	0.369844
lcl|NC_003279.8_cds_NP_001021446.1_3677	0.328354	0.532675	0.339869
lcl|NC_003279.8_cds_NP_001021448.1_2840	0.330277	0.632042	0.386432
lcl|NC_003279.8_cds_NP_001021449.1_2841	0.33987	0.631772	0.387266
lcl|NC_003279.8_cds_NP_001021450.1_2839	0.313913	0.601037	0.370605
lcl|NC_003279.8_cds_NP_001021451.1_2517	0.368586	0.612805	0.416844
lcl|NC_003279.8_cds_NP_001021452.1_3275	0.317121	0.479758	0.34979
lcl|NC_003279.8_cds_NP_001021453.1_3280	0.377504	0.60989	0.404094
lcl|NC_003279.8_cds_NP_001021455.1_2568	0.320245	0.532126	0.355344
lcl|NC_003279.8_cds_NP_001021456.1_2573	0.259859	0.563587	0.339052
lcl|NC_003279.8_cds_NP_001021457.1_2645	0.333527	0.606178	0.366473
lcl|NC_003279.8_cds_NP_001021458.1_2643	0.332189	0.601215	0.365013
lcl|NC_003279.8_cds_NP_001021460.2_2648	0.282558	0.548642	0.327143
lcl|NC_003279.8_cds_NP_001021463.1_4249	0.328401	0.573195	0.36669
lcl|NC_003279.8_cds_NP_001021465.1_2996	0.333995	0.578498	0.379317
lcl|NC_003279.8_cds_NP_001021466.1_2997	0.32927	0.566938	0.373927
lcl|NC_003279.8_cds_NP_001021467.1_2709	0.316058	0.577108	0.353305
lcl|NC_003279.8_cds_NP_001021468.1_2708	0.318711	0.572369	0.354174
lcl|NC_003279.8_cds_NP_001021474.1_1386	0.326143	0.586657	0.371921
lcl|NC_003279.8_cds_NP_001021475.1_2053	0.329995	0.607258	0.370285
lcl|NC_003279.8_cds_NP_001021478.1_2342	0.313156	0.564989	0.357238
lcl|NC_003279.8_cds_NP_001021479.1_2343	0.315122	0.58388	0.362233
lcl|NC_003279.8_cds_NP_001021480.1_2339	0.335021	0.606452	0.37611
lcl|NC_003279.8_cds_NP_001021482.1_2862	0.317032	0.568518	0.363736
lcl|NC_003279.8_cds_NP_001021485.1_2869	0.363325	0.609353	0.417267
lcl|NC_003279.8_cds_NP_001021486.2_2870	0.322031	0.586001	0.375144
lcl|NC_003279.8_cds_NP_001021488.1_943	0.344082	0.584496	0.372481
lcl|NC_003279.8_cds_NP_001021489.1_36	0.379125	0.607459	0.40347
lcl|NC_003279.8_cds_NP_001021492.1_1287	0.32435	0.566535	0.364348
lcl|NC_003279.8_cds_NP_001021493.1_1288	0.327104	0.571122	0.367153
lcl|NC_003279.8_cds_NP_001021494.1_1399	0.313661	0.560449	0.355789
lcl|NC_003279.8_cds_NP_001021495.1_1400	0.232122	0.445041	0.285949
lcl|NC_003279.8_cds_NP_001021496.1_997	0.32904	0.559725	0.368134
lcl|NC_003279.8_cds_NP_001021497.1_1006	0.326128	0.566574	0.36688
lcl|NC_003279.8_cds_NP_001021498.1_998	0.333097	0.547702	0.368717
lcl|NC_003279.8_cds_NP_001021499.1_1003	0.348149	0.558098	0.378041
lcl|NC_003279.8_cds_NP_001021500.1_1002	0.338851	0.53428	0.371254
lcl|NC_003279.8_cds_NP_001021501.2_1001	0.340656	0.541404	0.369827
lcl|NC_003279.8_cds_NP_001021502.1_2524	0.308377	0.573579	0.366468
lcl|NC_003279.8_cds_NP_001021503.1_2525	0.311263	0.58873	0.371137
lcl|NC_003279.8_cds_NP_001021504.1_143	0.296819	0.545327	0.343514
lcl|NC_003279.8_cds_NP_001021506.4_1654	0.347134	0.5863	0.391145
lcl|NC_003279.8_cds_NP_001021510.1_3298	0.388026	0.708773	0.419839
lcl|NC_003279.8_cds_NP_001021512.2_1519	0.333908	0.551919	0.368133
lcl|NC_003279.8_cds_NP_001021516.1_3495	0.316386	0.551441	0.352664
lcl|NC_003279.8_cds_NP_001021517.1_3496	0.298933	0.535368	0.339858
lcl|NC_003279.8_cds_NP_001021518.1_3491	0.301936	0.51411	0.345663
lcl|NC_003279.8_cds_NP_001021519.1_3490	0.301294	0.519842	0.345767
lcl|NC_003279.8_cds_NP_001021520.1_3489	0.328671	0.517076	0.356587
lcl|NC_003279.8_cds_NP_001021521.1_1448	0.387476	0.61358	0.41082
lcl|NC_003279.8_cds_NP_001021522.1_3055	0.312132	0.530172	0.362684
lcl|NC_003279.8_cds_NP_001021526.1_3696	0.5274	0.879863	0.511078
lcl|NC_003279.8_cds_NP_001021529.1_3697	0.527993	0.880504	0.513
lcl|NC_003279.8_cds_NP_001021531.1_2290	0.354972	0.621009	0.399972
lcl|NC_003279.8_cds_NP_001021532.1_2615	0.306026	0.576008	0.368399
lcl|NC_003279.8_cds_NP_001021535.1_840	0.408918	0.669779	0.442953
lcl|NC_003279.8_cds_NP_001021536.1_841	0.405526	0.688295	0.44335
lcl|NC_003279.8_cds_NP_001021537.2_838	0.33176	0.552664	0.366965
lcl|NC_003279.8_cds_NP_001021540.1_1734	0.339531	0.612707	0.377194
lcl|NC_003279.8_cds_NP_001021541.1_1730	0.335696	0.61477	0.377018
lcl|NC_003279.8_cds_NP_001021542.1_1729	0.333539	0.615142	0.379514
lcl|NC_003279.8_cds_NP_001021543.1_1728	0.3342	0.613479	0.382432
lcl|NC_003279.8_cds_NP_001021544.2_1736	0.338577	0.612934	0.378506
lcl|NC_003279.8_cds_NP_001021545.1_1737	0.339748	0.611915	0.3789
lcl|NC_003279.8_cds_NP_001021547.1_2267	0.321444	0.578311	0.363138
lcl|NC_003279.8_cds_NP_001021551.1_2766	0.323488	0.580161	0.377434
lcl|NC_003279.8_cds_NP_001021553.1_2756	0.390973	0.644304	0.424718
lcl|NC_003279.8_cds_NP_001021555.2_2460	0.33348	0.581164	0.37338
lcl|NC_003279.8_cds_NP_001021556.2_2459	0.334828	0.585387	0.374769
lcl|NC_003279.8_cds_NP_001021559.2_624	0.32833	0.560594	0.360319
lcl|NC_003279.8_cds_NP_001021562.1_625	0.358775	0.590088	0.388574
lcl|NC_003279.8_cds_NP_001021564.1_2849	0.345757	0.637211	0.380142
lcl|NC_003279.8_cds_NP_001021565.1_2850	0.343368	0.630017	0.378358
lcl|NC_003279.8_cds_NP_001021568.2_3647	0.34309	0.550512	0.372953
lcl|NC_003279.8_cds_NP_001021570.2_768	0.33507	0.596517	0.377106
lcl|NC_003279.8_cds_NP_001021574.1_436	0.330759	0.559965	0.363832
lcl|NC_003279.8_cds_NP_001021575.1_1467	0.362345	0.673255	0.4047
lcl|NC_003279.8_cds_NP_001021578.1_3892	0.377052	0.637627	0.421447
lcl|NC_003279.8_cds_NP_001021580.1_2409	0.313397	0.584628	0.357719
lcl|NC_003279.8_cds_NP_001021581.1_1994	0.344885	0.596065	0.385311
lcl|NC_003279.8_cds_NP_001021583.1_2013	0.337072	0.610429	0.380832
lcl|NC_003279.8_cds_NP_001021584.1_3460	0.371989	0.604851	0.414595
lcl|NC_003279.8_cds_NP_001021585.1_3461	0.394013	0.596928	0.429374
lcl|NC_003279.8_cds_NP_001021587.1_2207	0.487195	0.863997	0.501646
lcl|NC_003279.8_cds_NP_001021588.1_2206	0.462109	0.832358	0.486332
lcl|NC_003279.8_cds_NP_001021589.1_2210	0.489118	0.869655	0.503727
lcl|NC_003279.8_cds_NP_001021590.1_2208	0.489112	0.865361	0.504133
lcl|NC_003279.8_cds_NP_001021592.1_1050	0.295292	0.530244	0.346146
lcl|NC_003279.8_cds_NP_001021593.1_3148	0.35065	0.591376	0.392676
lcl|NC_003279.8_cds_NP_001021594.1_3145	0.354051	0.614136	0.392895
lcl|NC_003279.8_cds_NP_001021595.1_3144	0.353391	0.61538	0.392157
lcl|NC_003279.8_cds_NP_001021596.1_3142	0.355806	0.634238	0.397324
lcl|NC_003279.8_cds_NP_001021597.1_3150	0.365437	0.636796	0.405079
lcl|NC_003279.8_cds_NP_001021598.2_3140	0.3532	0.624991	0.393915
lcl|NC_003279.8_cds_NP_001021600.1_1134	0.314267	0.552699	0.35636
lcl|NC_003279.8_cds_NP_001021602.1_2418	0.359086	0.628552	0.392709
lcl|NC_003279.8_cds_NP_001021603.1_2421	0.347699	0.617296	0.384036
lcl|NC_003279.8_cds_NP_001021606.1_962	0.299878	0.550766	0.331403
lcl|NC_003279.8_cds_NP_001021610.1_2781	0.36178	0.59911	0.39748
lcl|NC_003279.8_cds_NP_001021611.1_196	0.338171	0.547986	0.36939
lcl|NC_003279.8_cds_NP_001021612.1_197	0.335184	0.542595	0.366359
lcl|NC_003279.8_cds_NP_001021613.1_3729	0.309361	0.494438	0.352868
lcl|NC_003279.8_cds_NP_001021614.1_3723	0.366424	0.612979	0.396399
lcl|NC_003279.8_cds_NP_001021615.1_3722	0.370635	0.616761	0.398691
lcl|NC_003279.8_cds_NP_001021621.1_2358	0.391799	0.669451	0.424708
lcl|NC_003279.8_cds_NP_001021625.1_1908	0.346818	0.623044	0.382768
lcl|NC_003279.8_cds_NP_001021626.1_1906	0.348825	0.630099	0.387765
lcl|NC_003279.8_cds_NP_001021627.1_1907	0.341782	0.619418	0.38339
lcl|NC_003279.8_cds_NP_001021628.2_3080	0.334004	0.590879	0.375064
lcl|NC_003279.8_cds_NP_001021629.1_3081	0.33669	0.602312	0.377818
lcl|NC_003279.8_cds_NP_001021631.1_2234	0.326316	0.602258	0.362878
lcl|NC_003279.8_cds_NP_001021632.1_2235	0.324619	0.598088	0.361102
lcl|NC_003279.8_cds_NP_001021633.1_2233	0.30449	0.582396	0.356902
lcl|NC_003279.8_cds_NP_001021637.2_2158	0.31771	0.561115	0.361933
lcl|NC_003279.8_cds_NP_001021638.1_2155	0.353721	0.620936	0.384846
lcl|NC_003279.8_cds_NP_001021639.3_2883	0.331516	0.593989	0.374561
lcl|NC_003279.8_cds_NP_001021640.2_2882	0.330005	0.591187	0.372628
lcl|NC_003279.8_cds_NP_001021641.1_3707	0.298562	0.493546	0.330307
lcl|NC_003279.8_cds_NP_001021643.2_2286	0.332878	0.590564	0.369967
lcl|NC_003279.8_cds_NP_001021644.1_887	0.372572	0.65243	0.415662
lcl|NC_003279.8_cds_NP_001021645.1_888	0.37201	0.609201	0.419182
lcl|NC_003279.8_cds_NP_001021646.1_1951	0.411083	0.709115	0.426922
lcl|NC_003279.8_cds_NP_001021647.1_1952	0.421231	0.727985	0.435932
lcl|NC_003279.8_cds_NP_001021649.2_3225	0.338281	0.574948	0.383215
lcl|NC_003279.8_cds_NP_001021650.1_3224	0.334111	0.566661	0.374088
lcl|NC_003279.8_cds_NP_001021652.1_1864	0.333022	0.594322	0.369042
lcl|NC_003279.8_cds_NP_001021657.2_524	0.323345	0.53973	0.358117
lcl|NC_003279.8_cds_NP_001021659.1_523	0.312852	0.505264	0.356797
lcl|NC_003279.8_cds_NP_001021660.2_509	0.315281	0.532042	0.356402
lcl|NC_003279.8_cds_NP_001021661.2_512	0.316383	0.535021	0.35821
lcl|NC_003279.8_cds_NP_001021663.2_1275	0.325837	0.533278	0.351764
lcl|NC_003279.8_cds_NP_001021664.2_1280	0.303004	0.551262	0.339556
lcl|NC_003279.8_cds_NP_001021665.1_3984	0.280608	0.448007	0.328926
lcl|NC_003279.8_cds_NP_001021666.1_106	0.372461	0.646888	0.394094
lcl|NC_003279.8_cds_NP_001021667.1_3805	0.33699	0.573171	0.363621
lcl|NC_003279.8_cds_NP_001021668.1_3806	0.336618	0.566145	0.359135
lcl|NC_003279.8_cds_NP_001021670.1_4005	0.325246	0.529683	0.366408
lcl|NC_003279.8_cds_NP_001021671.2_4003	0.301286	0.486168	0.348288
lcl|NC_003279.8_cds_NP_001021672.1_4004	0.28081	0.489318	0.33681
lcl|NC_003279.8_cds_NP_001021673.1_4007	0.36049	0.601343	0.376373
lcl|NC_003279.8_cds_NP_001021675.1_717	0.362656	0.616846	0.384438
lcl|NC_003279.8_cds_NP_001021677.3_2598	0.337958	0.601968	0.380964
lcl|NC_003279.8_cds_NP_001021678.3_2602	0.340285	0.604747	0.379867
lcl|NC_003279.8_cds_NP_001021679.3_2601	0.346548	0.611256	0.383934
lcl|NC_003279.8_cds_NP_001021680.1_4147	0.307945	0.512487	0.353321
lcl|NC_003279.8_cds_NP_001021681.1_4148	0.308598	0.51042	0.353573
lcl|NC_003279.8_cds_NP_001021682.1_4149	0.308968	0.511001	0.354025
lcl|NC_003279.8_cds_NP_001021685.1_4168	0.310305	0.520306	0.353519
lcl|NC_003279.8_cds_NP_001021686.1_4169	0.309856	0.5193	0.354014
lcl|NC_003279.8_cds_NP_001021687.1_4154	0.322048	0.563593	0.355873
lcl|NC_003279.8_cds_NP_001021688.3_4164	0.321247	0.530698	0.350532
lcl|NC_003279.8_cds_NP_001021690.1_4138	0.283139	0.397254	0.321818
lcl|NC_003279.8_cds_NP_001021691.1_4140	0.304731	0.505536	0.353074
lcl|NC_003279.8_cds_NP_001021692.1_4141	0.307889	0.509162	0.354779
lcl|NC_003279.8_cds_NP_001021693.1_4144	0.327542	0.58605	0.359393
lcl|NC_003279.8_cds_NP_001021694.1_4143	0.303201	0.547866	0.337346
lcl|NC_003279.8_cds_NP_001021695.1_4183	0.526578	0.880918	0.514303
lcl|NC_003279.8_cds_NP_001021696.1_4197	0.510886	0.858843	0.501713
lcl|NC_003279.8_cds_NP_001021697.1_4195	0.450439	0.787734	0.457276
lcl|NC_003279.8_cds_NP_001021698.1_4193	0.519387	0.86549	0.510205
lcl|NC_003279.8_cds_NP_001021699.1_4200	0.496328	0.83681	0.488877
lcl|NC_003279.8_cds_NP_001021700.1_4201	0.391293	0.623121	0.401319
lcl|NC_003279.8_cds_NP_001021701.1_4182	0.39186	0.657996	0.406856
lcl|NC_003279.8_cds_NP_001021702.1_4202	0.315034	0.547175	0.350033
lcl|NC_003279.8_cds_NP_001021703.1_4203	0.323077	0.561847	0.36158
lcl|NC_003279.8_cds_NP_001021704.1_4211	0.321673	0.583829	0.369771
lcl|NC_003279.8_cds_NP_001021705.2_4212	0.326833	0.588561	0.377282
lcl|NC_003279.8_cds_NP_001021706.1_2928	0.311526	0.600882	0.359684
lcl|NC_003279.8_cds_NP_001021709.1_3016	0.460771	0.739345	0.478376
lcl|NC_003279.8_cds_NP_001021710.1_3014	0.465146	0.748958	0.484394
lcl|NC_003279.8_cds_NP_001021711.1_3015	0.460584	0.74033	0.479112
lcl|NC_003279.8_cds_NP_001021714.1_1334	0.322515	0.603045	0.358323
lcl|NC_003279.8_cds_NP_001021715.1_1335	0.307951	0.584977	0.351281
lcl|NC_003279.8_cds_NP_001021718.1_1332	0.321584	0.586272	0.359033
lcl|NC_003279.8_cds_NP_001021719.1_1333	0.322482	0.586977	0.359288
lcl|NC_003279.8_cds_NP_001021720.1_1145	0.327746	0.481068	0.363128
lcl|NC_003279.8_cds_NP_001021722.1_3765	0.540599	0.807637	0.532619
lcl|NC_003279.8_cds_NP_001021723.1_3769	0.313065	0.560908	0.35265
lcl|NC_003279.8_cds_NP_001021724.1_3756	0.306773	0.492478	0.361763
lcl|NC_003279.8_cds_NP_001021725.1_3764	0.379574	0.589525	0.412404
lcl|NC_003279.8_cds_NP_001021726.2_3741	0.317974	0.572415	0.356397
lcl|NC_003279.8_cds_NP_001021728.1_3747	0.313824	0.546347	0.35278
lcl|NC_003279.8_cds_NP_001021729.1_3748	0.314428	0.549591	0.353366
lcl|NC_003279.8_cds_NP_001021730.1_3750	0.30486	0.551862	0.344747
lcl|NC_003279.8_cds_NP_001021731.1_3751	0.305549	0.55304	0.346567
lcl|NC_003279.8_cds_NP_001021732.1_3749	0.309118	0.55315	0.347512
lcl|NC_003279.8_cds_NP_001021733.2_166	0.283047	0.496161	0.327946
lcl|NC_003279.8_cds_NP_001021734.2_187	0.308174	0.515581	0.34119
lcl|NC_003279.8_cds_NP_001021736.1_478	0.313431	0.509214	0.345744
lcl|NC_003279.8_cds_NP_001021738.1_3822	0.30996	0.564168	0.372656
lcl|NC_003279.8_cds_NP_001021739.3_3824	0.290141	0.575827	0.329361
lcl|NC_003279.8_cds_NP_001021741.1_248	0.392879	0.628517	0.412755
lcl|NC_003279.8_cds_NP_001021744.1_234	0.325852	0.555529	0.355881
lcl|NC_003279.8_cds_NP_001021745.1_507	0.357436	0.615031	0.393396
lcl|NC_003279.8_cds_NP_001021746.1_506	0.357887	0.614207	0.393657
lcl|NC_003279.8_cds_NP_001021748.2_3177	0.332523	0.574765	0.372294
lcl|NC_003279.8_cds_NP_001021750.2_3178	0.29307	0.526027	0.347012
lcl|NC_003279.8_cds_NP_001021751.1_3179	0.34363	0.60637	0.377534
lcl|NC_003279.8_cds_NP_001021752.1_3996	0.318853	0.552759	0.354458
lcl|NC_003279.8_cds_NP_001021753.1_3997	0.323758	0.557347	0.358059
lcl|NC_003279.8_cds_NP_001021756.1_563	0.320622	0.540929	0.363311
lcl|NC_003279.8_cds_NP_001021761.1_851	0.337224	0.611017	0.375041
lcl|NC_003279.8_cds_NP_001021762.2_860	0.344222	0.61019	0.37458
lcl|NC_003279.8_cds_NP_001021763.2_862	0.348981	0.607301	0.377694
lcl|NC_003279.8_cds_NP_001021764.1_869	0.346224	0.572138	0.375136
lcl|NC_003279.8_cds_NP_001021765.1_871	0.350381	0.590912	0.392012
lcl|NC_003279.8_cds_NP_001021766.1_861	0.330374	0.493787	0.356958
lcl|NC_003279.8_cds_NP_001021767.1_878	0.339018	0.577282	0.371089
lcl|NC_003279.8_cds_NP_001021768.1_885	0.303355	0.510799	0.342263
lcl|NC_003279.8_cds_NP_001021769.1_855	0.319913	0.552403	0.349794
lcl|NC_003279.8_cds_NP_001021770.1_856	0.31623	0.545239	0.347393
lcl|NC_003279.8_cds_NP_001021772.1_3447	0.316785	0.532783	0.379351
lcl|NC_003279.8_cds_NP_001021773.1_3446	0.314607	0.527727	0.378537
lcl|NC_003279.8_cds_NP_001021775.1_3936	0.311832	0.515208	0.362199
lcl|NC_003279.8_cds_NP_001021776.2_51	0.289172	0.5339	0.344472
lcl|NC_003279.8_cds_NP_001021777.1_11	0.322296	0.516762	0.362121
lcl|NC_003279.8_cds_NP_001021778.1_16	0.297932	0.508433	0.337338
lcl|NC_003279.8_cds_NP_001021779.1_303	0.316789	0.535248	0.351885
lcl|NC_003279.8_cds_NP_001021781.2_467	0.313752	0.550003	0.336829
lcl|NC_003279.8_cds_NP_001021782.1_3208	0.294268	0.531525	0.346985
lcl|NC_003279.8_cds_NP_001021783.1_3209	0.299494	0.536568	0.348889
lcl|NC_003279.8_cds_NP_001021784.2_3210	0.319894	0.534425	0.363499
lcl|NC_003279.8_cds_NP_001021785.2_3211	0.324979	0.544558	0.367006
lcl|NC_003279.8_cds_NP_001021788.1_3303	0.340349	0.554886	0.369757
lcl|NC_003279.8_cds_NP_001021789.1_3302	0.339913	0.551948	0.368071
lcl|NC_003279.8_cds_NP_001021791.1_795	0.370068	0.644169	0.399963
lcl|NC_003279.8_cds_NP_001021792.1_794	0.358195	0.625972	0.393546
lcl|NC_003279.8_cds_NP_001021793.1_784	0.392053	0.632006	0.438146
lcl|NC_003279.8_cds_NP_001021797.1_139	0.318753	0.53199	0.356738
lcl|NC_003279.8_cds_NP_001021798.2_3965	0.31404	0.548439	0.354512
lcl|NC_003279.8_cds_NP_001021799.1_3966	0.307736	0.523534	0.349561
lcl|NC_003279.8_cds_NP_001021801.1_3994	0.335396	0.538959	0.364554
lcl|NC_003279.8_cds_NP_001021802.1_3993	0.338678	0.541129	0.367676
lcl|NC_003279.8_cds_NP_001021804.2_4046	0.31291	0.551675	0.345084
lcl|NC_003279.8_cds_NP_001021806.1_741	0.352172	0.615989	0.380448
lcl|NC_003279.8_cds_NP_001021807.1_742	0.354548	0.626687	0.387841
lcl|NC_003279.8_cds_NP_001021809.1_745	0.317201	0.569984	0.358542
lcl|NC_003279.8_cds_NP_001021811.1_682	0.32311	0.561158	0.362316
lcl|NC_003279.8_cds_NP_001021813.1_663	0.332898	0.545709	0.367178
lcl|NC_003279.8_cds_NP_001021818.1_400	0.365529	0.589826	0.39774
lcl|NC_003279.8_cds_NP_001021820.1_378	0.304476	0.487724	0.358028
lcl|NC_003279.8_cds_NP_001021821.2_387	0.31151	0.470026	0.345193
lcl|NC_003279.8_cds_NP_001021822.2_386	0.288854	0.477977	0.326291
lcl|NC_003279.8_cds_NP_001021823.2_425	0.341354	0.55917	0.388039
lcl|NC_003279.8_cds_NP_001021825.2_423	0.338269	0.601422	0.380292
lcl|NC_003279.8_cds_NP_001021826.2_382	0.333876	0.602246	0.36791
lcl|NC_003279.8_cds_NP_001021829.1_366	0.320788	0.560804	0.363427
lcl|NC_003279.8_cds_NP_001021830.1_598	0.320135	0.551956	0.357466
lcl|NC_003279.8_cds_NP_001021831.1_3956	0.298908	0.505829	0.344733
lcl|NC_003279.8_cds_NP_001021832.1_3955	0.305478	0.532979	0.348954
lcl|NC_003279.8_cds_NP_001021833.1_3943	0.295303	0.486479	0.330623
lcl|NC_003279.8_cds_NP_001021834.1_3946	0.313572	0.544356	0.35805
lcl|NC_003279.8_cds_NP_001021835.1_3945	0.350686	0.612884	0.385462
lcl|NC_003279.8_cds_NP_001021836.1_3949	0.35587	0.533919	0.396963
lcl|NC_003279.8_cds_NP_001021837.1_3960	0.377919	0.660515	0.413978
lcl|NC_003279.8_cds_NP_001021838.1_3959	0.380629	0.657297	0.415156
lcl|NC_003279.8_cds_NP_001021842.1_208	0.332067	0.537762	0.360726
lcl|NC_003279.8_cds_NP_001021844.1_1752	0.322605	0.592347	0.363774
lcl|NC_003279.8_cds_NP_001021845.1_1750	0.332382	0.590708	0.374021
lcl|NC_003279.8_cds_NP_001021846.1_4053	0.307851	0.539901	0.343622
lcl|NC_003279.8_cds_NP_001021847.1_4055	0.361249	0.572198	0.375772
lcl|NC_003279.8_cds_NP_001021848.1_4050	0.332065	0.549692	0.358311
lcl|NC_003279.8_cds_NP_001021849.1_4054	0.310771	0.541681	0.347969
lcl|NC_003279.8_cds_NP_001021850.1_4051	0.327707	0.549318	0.351525
lcl|NC_003279.8_cds_NP_001021851.2_2994	0.338414	0.601601	0.377504
lcl|NC_003279.8_cds_NP_001021852.2_2995	0.34218	0.613824	0.381369
lcl|NC_003279.8_cds_NP_001021853.1_3427	0.420667	0.723626	0.43953
lcl|NC_003279.8_cds_NP_001021854.1_3417	0.377964	0.641313	0.406977
lcl|NC_003279.8_cds_NP_001021855.1_3418	0.377962	0.641486	0.406976
lcl|NC_003279.8_cds_NP_001021856.1_3423	0.42065	0.724928	0.439769
lcl|NC_003279.8_cds_NP_001021857.1_3424	0.423846	0.728706	0.442058
lcl|NC_003279.8_cds_NP_001021858.1_3426	0.422891	0.728531	0.441559
lcl|NC_003279.8_cds_NP_001021859.1_3416	0.378321	0.644285	0.407574
lcl|NC_003279.8_cds_NP_001021860.1_3795	0.350182	0.596317	0.380311
lcl|NC_003279.8_cds_NP_001021861.1_3796	0.350861	0.593476	0.385061
lcl|NC_003279.8_cds_NP_001021862.1_3794	0.346542	0.58488	0.377122
lcl|NC_003279.8_cds_NP_001021863.1_2313	0.311828	0.575934	0.356125
lcl|NC_003279.8_cds_NP_001021864.1_2314	0.30774	0.574309	0.352216
lcl|NC_003279.8_cds_NP_001021865.1_2322	0.361886	0.667343	0.39712
lcl|NC_003279.8_cds_NP_001021866.1_4278	0.391336	0.656038	0.420526
lcl|NC_003279.8_cds_NP_001021867.1_4305	0.349638	0.595161	0.384382
lcl|NC_003279.8_cds_NP_001021868.4_3231	0.305178	0.469733	0.336358
lcl|NC_003279.8_cds_NP_001021871.1_2081	0.333508	0.596718	0.377486
lcl|NC_003279.8_cds_NP_001021872.1_2084	0.338077	0.607821	0.380658
lcl|NC_003279.8_cds_NP_001021873.1_2079	0.329057	0.583085	0.372959
lcl|NC_003279.8_cds_NP_001021874.1_2080	0.333529	0.596528	0.377433
lcl|NC_003279.8_cds_NP_001021875.1_2089	0.344588	0.592025	0.383662
lcl|NC_003279.8_cds_NP_001021877.2_4102	0.326459	0.501863	0.357524
lcl|NC_003279.8_cds_NP_001021878.2_4101	0.325436	0.500208	0.3565
lcl|NC_003279.8_cds_NP_001021879.1_4103	0.379705	0.650956	0.422683
lcl|NC_003279.8_cds_NP_001021881.1_2606	0.340896	0.612594	0.378096
lcl|NC_003279.8_cds_NP_001021882.2_4300	0.337291	0.581474	0.375939
lcl|NC_003279.8_cds_NP_001025227.1_2638	0.322168	0.597178	0.379791
lcl|NC_003279.8_cds_NP_001025228.2_2634	0.316869	0.573371	0.372874
lcl|NC_003279.8_cds_NP_001032969.1_1999	0.343665	0.589361	0.387814
lcl|NC_003279.8_cds_NP_001032970.1_2004	0.3519	0.601816	0.394374
lcl|NC_003279.8_cds_NP_001032971.1_2002	0.342065	0.592545	0.386952
lcl|NC_003279.8_cds_NP_001032972.1_2479	0.332188	0.520597	0.38807
lcl|NC_003279.8_cds_NP_001032973.1_1829	0.328918	0.587781	0.369336
lcl|NC_003279.8_cds_NP_001032975.1_2572	0.351267	0.598717	0.388774
lcl|NC_003279.8_cds_NP_001032976.1_2571	0.362659	0.620088	0.401841
lcl|NC_003279.8_cds_NP_001032977.1_2821	0.32045	0.622536	0.37104
lcl|NC_003279.8_cds_NP_001032978.1_1494	0.347689	0.646887	0.398894
lcl|NC_003279.8_cds_NP_001032980.2_1767	0.353417	0.588487	0.383228
lcl|NC_003279.8_cds_NP_001032981.2_1639	0.304085	0.57558	0.335774
lcl|NC_003279.8_cds_NP_001032982.1_828	0.357307	0.552377	0.380983
lcl|NC_003279.8_cds_NP_001032983.2_833	0.335634	0.544465	0.369591
lcl|NC_003279.8_cds_NP_001032984.2_836	0.328687	0.540909	0.372775
lcl|NC_003279.8_cds_NP_001032985.1_505	0.35601	0.602317	0.378898
lcl|NC_003279.8_cds_NP_001032986.1_482	0.326796	0.546587	0.363822
lcl|NC_003279.8_cds_NP_001032987.1_483	0.328511	0.544727	0.364644
lcl|NC_003279.8_cds_NP_001032988.1_456	0.321558	0.540761	0.353591
lcl|NC_003279.8_cds_NP_001032989.1_457	0.33159	0.540382	0.361735
lcl|NC_003279.8_cds_NP_001032990.1_333	0.345639	0.564231	0.37806
lcl|NC_003279.8_cds_NP_001032991.1_334	0.37568	0.581314	0.399149
lcl|NC_003279.8_cds_NP_001032992.1_230	0.345558	0.575526	0.371212
lcl|NC_003279.8_cds_NP_001032993.1_229	0.346058	0.574339	0.371818
lcl|NC_003279.8_cds_NP_001040626.1_1186	0.322686	0.572119	0.37023
lcl|NC_003279.8_cds_NP_001040627.1_1187	0.321867	0.568145	0.370365
lcl|NC_003279.8_cds_NP_001040628.2_3124	0.340221	0.598221	0.37923
lcl|NC_003279.8_cds_NP_001040629.2_3125	0.342198	0.604008	0.381712
lcl|NC_003279.8_cds_NP_001040630.1_3130	0.307738	0.5666	0.37899
lcl|NC_003279.8_cds_NP_001040631.1_3129	0.33507	0.575049	0.397942
lcl|NC_003279.8_cds_NP_001040632.1_1359	0.325102	0.58072	0.362099
lcl|NC_003279.8_cds_NP_001040633.1_1360	0.332057	0.578025	0.36504
lcl|NC_003279.8_cds_NP_001040634.1_1364	0.364957	0.639081	0.401184
lcl|NC_003279.8_cds_NP_001040635.1_1365	0.384352	0.637825	0.426779
lcl|NC_003279.8_cds_NP_001040636.1_3835	0.311964	0.558389	0.352103
lcl|NC_003279.8_cds_NP_001040637.1_3829	0.31585	0.554435	0.347387
lcl|NC_003279.8_cds_NP_001040638.2_2109	0.3077	0.593908	0.360953
lcl|NC_003279.8_cds_NP_001040639.2_2110	0.300247	0.586319	0.35551
lcl|NC_003279.8_cds_NP_001040640.1_1418	0.363736	0.648845	0.401587
lcl|NC_003279.8_cds_NP_001040641.1_1417	0.362308	0.64822	0.400404
lcl|NC_003279.8_cds_NP_001040642.1_1081	0.344189	0.581088	0.367768
lcl|NC_003279.8_cds_NP_001040643.1_1082	0.348788	0.580277	0.365567
lcl|NC_003279.8_cds_NP_001040644.1_431	0.332439	0.517228	0.364262
lcl|NC_003279.8_cds_NP_001040645.1_2249	0.347613	0.63425	0.383714
lcl|NC_003279.8_cds_NP_001040646.1_2251	0.365079	0.652082	0.390185
lcl|NC_003279.8_cds_NP_001040647.2_2376	0.396131	0.703466	0.432322
lcl|NC_003279.8_cds_NP_001040648.2_2375	0.390891	0.695786	0.426085
lcl|NC_003279.8_cds_NP_001040649.1_3772	0.370246	0.639267	0.404113
lcl|NC_003279.8_cds_NP_001040650.1_3853	0.339854	0.606573	0.375549
lcl|NC_003279.8_cds_NP_001040651.1_1966	0.353165	0.57607	0.382541
lcl|NC_003279.8_cds_NP_001040654.1_1716	0.333128	0.61624	0.376817
lcl|NC_003279.8_cds_NP_001040656.2_2168	0.40228	0.677208	0.436795
lcl|NC_003279.8_cds_NP_001040657.1_2169	0.499915	0.848613	0.508941
lcl|NC_003279.8_cds_NP_001040658.2_1273	0.377219	0.648805	0.411783
lcl|NC_003279.8_cds_NP_001040659.1_1274	0.38571	0.663076	0.421476
lcl|NC_003279.8_cds_NP_001040660.1_3076	0.353438	0.603067	0.392767
lcl|NC_003279.8_cds_NP_001040661.1_3077	0.324962	0.536363	0.369301
lcl|NC_003279.8_cds_NP_001040663.1_2837	0.328684	0.574756	0.368052
lcl|NC_003279.8_cds_NP_001040664.1_2838	0.326553	0.574759	0.372061
lcl|NC_003279.8_cds_NP_001040665.1_2644	0.33353	0.604903	0.36621
lcl|NC_003279.8_cds_NP_001040666.1_3192	0.327239	0.58592	0.367201
lcl|NC_003279.8_cds_NP_001040667.1_3193	0.340915	0.605856	0.378067
lcl|NC_003279.8_cds_NP_001040668.1_2061	0.33486	0.575279	0.373428
lcl|NC_003279.8_cds_NP_001040669.2_3058	0.323831	0.559945	0.365036
lcl|NC_003279.8_cds_NP_001040670.2_3059	0.31895	0.557281	0.361929
lcl|NC_003279.8_cds_NP_001040671.1_2401	0.296392	0.560115	0.344258
lcl|NC_003279.8_cds_NP_001040672.1_2400	0.299667	0.561582	0.343453
lcl|NC_003279.8_cds_NP_001040673.1_2404	0.373795	0.739788	0.429423
lcl|NC_003279.8_cds_NP_001040674.1_843	0.435523	0.758967	0.479855
lcl|NC_003279.8_cds_NP_001040675.1_3644	0.332927	0.523436	0.364606
lcl|NC_003279.8_cds_NP_001040676.1_3646	0.338336	0.503101	0.393901
lcl|NC_003279.8_cds_NP_001040677.2_3648	0.325612	0.509439	0.361935
lcl|NC_003279.8_cds_NP_001040678.1_3651	0.323138	0.504913	0.367434
lcl|NC_003279.8_cds_NP_001040680.1_1200	0.356692	0.611603	0.387622
lcl|NC_003279.8_cds_NP_001040681.1_1201	0.365856	0.6004	0.399033
lcl|NC_003279.8_cds_NP_001040682.2_1923	0.336823	0.611599	0.379707
lcl|NC_003279.8_cds_NP_001040683.2_1924	0.333994	0.606138	0.37536
lcl|NC_003279.8_cds_NP_001040684.1_2973	0.365937	0.635986	0.39366
lcl|NC_003279.8_cds_NP_001040685.1_2974	0.376235	0.654378	0.404413
lcl|NC_003279.8_cds_NP_001040686.1_2975	0.422245	0.700831	0.440323
lcl|NC_003279.8_cds_NP_001040687.1_3704	0.359597	0.59267	0.396295
lcl|NC_003279.8_cds_NP_001040688.1_3705	0.374166	0.581514	0.408827
lcl|NC_003279.8_cds_NP_001040689.1_3634	0.323278	0.528631	0.368398
lcl|NC_003279.8_cds_NP_001040690.1_3637	0.337201	0.528205	0.374716
lcl|NC_003279.8_cds_NP_001040691.1_3636	0.322629	0.514277	0.360352
lcl|NC_003279.8_cds_NP_001040692.2_2287	0.318199	0.583218	0.360121
lcl|NC_003279.8_cds_NP_001040693.2_2288	0.317988	0.58613	0.359844
lcl|NC_003279.8_cds_NP_001040695.1_706	0.324383	0.554304	0.37436
lcl|NC_003279.8_cds_NP_001040698.1_4013	0.32633	0.545276	0.364545
lcl|NC_003279.8_cds_NP_001040699.1_1140	0.307343	0.576546	0.347064
lcl|NC_003279.8_cds_NP_001040701.2_189	0.342708	0.460387	0.382134
lcl|NC_003279.8_cds_NP_001040702.2_504	0.330006	0.559848	0.380059
lcl|NC_003279.8_cds_NP_001040703.1_805	0.326634	0.545372	0.367039
lcl|NC_003279.8_cds_NP_001040704.1_3449	0.335303	0.591391	0.37967
lcl|NC_003279.8_cds_NP_001040705.1_3450	0.349959	0.588566	0.389187
lcl|NC_003279.8_cds_NP_001040706.1_3475	0.336938	0.585716	0.386127
lcl|NC_003279.8_cds_NP_001040707.1_799	0.351672	0.575386	0.38178
lcl|NC_003279.8_cds_NP_001040708.1_4048	0.316866	0.576559	0.356256
lcl|NC_003279.8_cds_NP_001040709.1_4049	0.312744	0.569647	0.351476
lcl|NC_003279.8_cds_NP_001040712.1_372	0.377229	0.594848	0.40957
lcl|NC_003279.8_cds_NP_001040713.1_373	0.363601	0.60089	0.39803
lcl|NC_003279.8_cds_NP_001040714.1_912	0.369238	0.538318	0.426003
lcl|NC_003279.8_cds_NP_001040715.1_913	0.377356	0.547794	0.431703
lcl|NC_003279.8_cds_NP_001040716.1_1759	0.343888	0.617097	0.382579
lcl|NC_003279.8_cds_NP_001040717.1_1760	0.347651	0.630371	0.383551
lcl|NC_003279.8_cds_NP_001040718.1_3321	0.307571	0.534919	0.351899
lcl|NC_003279.8_cds_NP_001040719.1_3320	0.307391	0.531395	0.350752
lcl|NC_003279.8_cds_NP_001040720.1_3874	0.333133	0.610025	0.377638
lcl|NC_003279.8_cds_NP_001040721.1_3425	0.421375	0.724521	0.439896
lcl|NC_003279.8_cds_NP_001076597.1_1795	0.32737	0.619168	0.388422
lcl|NC_003279.8_cds_NP_001076598.1_1796	0.319209	0.605626	0.380577
lcl|NC_003279.8_cds_NP_001076599.1_1154	0.371936	0.610796	0.40948
lcl|NC_003279.8_cds_NP_001076600.1_1153	0.32791	0.543685	0.368978
lcl|NC_003279.8_cds_NP_001076601.1_1167	0.28741	0.518941	0.32961
lcl|NC_003279.8_cds_NP_001076602.1_30	0.348483	0.612618	0.372184
lcl|NC_003279.8_cds_NP_001076603.1_2175	0.364626	0.624759	0.397888
lcl|NC_003279.8_cds_NP_001076604.1_2176	0.372115	0.639403	0.404143
lcl|NC_003279.8_cds_NP_001076605.1_2753	0.362729	0.650228	0.389175
lcl|NC_003279.8_cds_NP_001076606.3_314	0.325972	0.497679	0.3587
lcl|NC_003279.8_cds_NP_001076607.1_318	0.334521	0.525202	0.354958
lcl|NC_003279.8_cds_NP_001076608.1_319	0.312612	0.513864	0.354509
lcl|NC_003279.8_cds_NP_001076609.2_442	0.282813	0.460248	0.315723
lcl|NC_003279.8_cds_NP_001076611.1_3591	0.304144	0.538448	0.348503
lcl|NC_003279.8_cds_NP_001076612.1_1901	0.318963	0.557363	0.35172
lcl|NC_003279.8_cds_NP_001076613.1_3078	0.394188	0.740344	0.425984
lcl|NC_003279.8_cds_NP_001076614.1_3079	0.384661	0.724896	0.415822
lcl|NC_003279.8_cds_NP_001076615.1_2153	0.357588	0.622186	0.388505
lcl|NC_003279.8_cds_NP_001076616.1_1949	0.32715	0.50492	0.360316
lcl|NC_003279.8_cds_NP_001076617.1_1947	0.30187	0.588691	0.357512
lcl|NC_003279.8_cds_NP_001076618.1_1328	0.307771	0.568587	0.350789
lcl|NC_003279.8_cds_NP_001076619.1_262	0.315526	0.476932	0.34796
lcl|NC_003279.8_cds_NP_001076620.1_261	0.310801	0.478824	0.348241
lcl|NC_003279.8_cds_NP_001076621.1_3445	0.237764	0.412315	0.285029
lcl|NC_003279.8_cds_NP_001076622.2_3304	0.346608	0.556897	0.390289
lcl|NC_003279.8_cds_NP_001076623.1_3306	0.313011	0.563244	0.353595
lcl|NC_003279.8_cds_NP_001076625.1_746	0.347458	0.517481	0.368781
lcl|NC_003279.8_cds_NP_001122411.1_2922	0.299712	0.539136	0.34339
lcl|NC_003279.8_cds_NP_001122412.2_3915	0.394309	0.621151	0.405297
lcl|NC_003279.8_cds_NP_001122413.1_1370	0.357526	0.598798	0.395041
lcl|NC_003279.8_cds_NP_001122414.1_2007	0.350618	0.573157	0.38485
lcl|NC_003279.8_cds_NP_001122415.1_2008	0.329596	0.607225	0.367171
lcl|NC_003279.8_cds_NP_001122416.1_2009	0.345341	0.633958	0.389486
lcl|NC_003279.8_cds_NP_001122417.1_2804	0.361224	0.67914	0.410172
lcl|NC_003279.8_cds_NP_001122418.1_1213	0.325969	0.575424	0.364974
lcl|NC_003279.8_cds_NP_001122419.1_2673	0.308103	0.595613	0.367832
lcl|NC_003279.8_cds_NP_001122420.1_2812	0.31577	0.564241	0.356483
lcl|NC_003279.8_cds_NP_001122421.1_2813	0.309479	0.555236	0.340736
lcl|NC_003279.8_cds_NP_001122422.1_1070	0.307205	0.546503	0.349031
lcl|NC_003279.8_cds_NP_001122423.1_2944	0.367128	0.595214	0.386366
lcl|NC_003279.8_cds_NP_001122424.1_2949	0.319294	0.581369	0.355267
lcl|NC_003279.8_cds_NP_001122425.1_2105	0.322523	0.609407	0.358441
lcl|NC_003279.8_cds_NP_001122426.1_2482	0.288775	0.565893	0.348153
lcl|NC_003279.8_cds_NP_001122427.1_2745	0.334312	0.60491	0.376326
lcl|NC_003279.8_cds_NP_001122428.1_2749	0.342852	0.637849	0.391375
lcl|NC_003279.8_cds_NP_001122429.1_4097	0.292791	0.483303	0.333865
lcl|NC_003279.8_cds_NP_001122430.1_2738	0.308763	0.567292	0.360861
lcl|NC_003279.8_cds_NP_001122435.1_3666	0.327563	0.547611	0.361754
lcl|NC_003279.8_cds_NP_001122436.2_2387	0.323676	0.589209	0.362426
lcl|NC_003279.8_cds_NP_001122437.1_2388	0.276545	0.511208	0.334667
lcl|NC_003279.8_cds_NP_001122438.1_2395	0.335531	0.5914	0.372974
lcl|NC_003279.8_cds_NP_001122439.1_1037	0.365237	0.638547	0.397002
lcl|NC_003279.8_cds_NP_001122440.1_1040	0.34043	0.639559	0.384758
lcl|NC_003279.8_cds_NP_001122441.1_2374	0.343776	0.632991	0.388465
lcl|NC_003279.8_cds_NP_001122442.1_2368	0.338632	0.602296	0.380157
lcl|NC_003279.8_cds_NP_001122443.1_2370	0.305183	0.51068	0.338294
lcl|NC_003279.8_cds_NP_001122444.1_2371	0.321291	0.519054	0.348863
lcl|NC_003279.8_cds_NP_001122445.1_2298	0.3093	0.552395	0.355453
lcl|NC_003279.8_cds_NP_001122446.1_3779	0.293412	0.547182	0.337119
lcl|NC_003279.8_cds_NP_001122447.1_3777	0.31347	0.552465	0.348819
lcl|NC_003279.8_cds_NP_001122448.1_2906	0.328215	0.596647	0.371851
lcl|NC_003279.8_cds_NP_001122449.1_2905	0.326692	0.596279	0.369703
lcl|NC_003279.8_cds_NP_001122450.1_2913	0.328494	0.611975	0.366655
lcl|NC_003279.8_cds_NP_001122451.1_2049	0.366758	0.640568	0.405133
lcl|NC_003279.8_cds_NP_001122452.1_2050	0.39695	0.685258	0.419513
lcl|NC_003279.8_cds_NP_001122453.2_2040	0.402717	0.674034	0.428308
lcl|NC_003279.8_cds_NP_001122454.2_2039	0.404254	0.669668	0.428923
lcl|NC_003279.8_cds_NP_001122455.1_3355	0.279562	0.527712	0.359173
lcl|NC_003279.8_cds_NP_001122456.2_2684	0.32399	0.588838	0.364356
lcl|NC_003279.8_cds_NP_001122457.1_3855	0.326451	0.595174	0.363907
lcl|NC_003279.8_cds_NP_001122458.1_2027	0.325169	0.59572	0.361621
lcl|NC_003279.8_cds_NP_001122460.2_2831	0.324545	0.598963	0.373048
lcl|NC_003279.8_cds_NP_001122461.1_2164	0.338068	0.536829	0.36978
lcl|NC_003279.8_cds_NP_001122462.1_2172	0.322839	0.570003	0.36338
lcl|NC_003279.8_cds_NP_001122463.1_2171	0.366861	0.645137	0.404663
lcl|NC_003279.8_cds_NP_001122464.1_2715	0.318168	0.619775	0.369695
lcl|NC_003279.8_cds_NP_001122465.1_2716	0.35762	0.662476	0.402845
lcl|NC_003279.8_cds_NP_001122466.1_2713	0.304429	0.553451	0.347297
lcl|NC_003279.8_cds_NP_001122467.1_2197	0.338912	0.643179	0.372359
lcl|NC_003279.8_cds_NP_001122468.1_2198	0.336988	0.6466	0.371521
lcl|NC_003279.8_cds_NP_001122469.1_2199	0.311491	0.546535	0.348637
lcl|NC_003279.8_cds_NP_001122470.1_2562	0.276878	0.520738	0.333702
lcl|NC_003279.8_cds_NP_001122471.1_2507	0.332301	0.586537	0.374071
lcl|NC_003279.8_cds_NP_001122472.1_2508	0.331662	0.585934	0.373829
lcl|NC_003279.8_cds_NP_001122473.1_3042	0.313619	0.570036	0.357697
lcl|NC_003279.8_cds_NP_001122474.1_2471	0.337643	0.574171	0.381516
lcl|NC_003279.8_cds_NP_001122475.1_2432	0.324127	0.553832	0.356461
lcl|NC_003279.8_cds_NP_001122476.1_2433	0.297327	0.48218	0.321552
lcl|NC_003279.8_cds_NP_001122477.1_2440	0.369378	0.613632	0.40164
lcl|NC_003279.8_cds_NP_001122479.1_3003	0.318649	0.544939	0.357367
lcl|NC_003279.8_cds_NP_001122480.2_3198	0.352677	0.62427	0.388517
lcl|NC_003279.8_cds_NP_001122481.2_3200	0.401274	0.673861	0.420135
lcl|NC_003279.8_cds_NP_001122482.2_2217	0.318718	0.574017	0.368816
lcl|NC_003279.8_cds_NP_001122483.2_2216	0.317729	0.569332	0.369233
lcl|NC_003279.8_cds_NP_001122484.1_2526	0.325258	0.609616	0.387051
lcl|NC_003279.8_cds_NP_001122485.1_46	0.343623	0.590352	0.364602
lcl|NC_003279.8_cds_NP_001122486.1_1655	0.349779	0.650369	0.39434
lcl|NC_003279.8_cds_NP_001122487.2_1653	0.332229	0.59209	0.388296
lcl|NC_003279.8_cds_NP_001122489.1_1240	0.318918	0.584018	0.369508
lcl|NC_003279.8_cds_NP_001122490.1_1740	0.328782	0.599913	0.367757
lcl|NC_003279.8_cds_NP_001122491.1_1741	0.331484	0.60361	0.369351
lcl|NC_003279.8_cds_NP_001122492.1_2266	0.312001	0.550394	0.355619
lcl|NC_003279.8_cds_NP_001122493.1_776	0.345188	0.635192	0.378637
lcl|NC_003279.8_cds_NP_001122494.1_1461	0.328061	0.587612	0.368697
lcl|NC_003279.8_cds_NP_001122495.1_1462	0.327946	0.585735	0.368583
lcl|NC_003279.8_cds_NP_001122496.1_3887	0.330421	0.543533	0.370948
lcl|NC_003279.8_cds_NP_001122497.1_3889	0.330809	0.544864	0.370889
lcl|NC_003279.8_cds_NP_001122498.1_2677	0.330532	0.608318	0.385689
lcl|NC_003279.8_cds_NP_001122499.1_2678	0.327664	0.612102	0.384117
lcl|NC_003279.8_cds_NP_001122500.1_3535	0.325037	0.566258	0.364491
lcl|NC_003279.8_cds_NP_001122501.1_2018	0.329138	0.58127	0.376454
lcl|NC_003279.8_cds_NP_001122502.1_2022	0.3187	0.615265	0.370422
lcl|NC_003279.8_cds_NP_001122504.1_2417	0.358408	0.630155	0.392735
lcl|NC_003279.8_cds_NP_001122505.1_2415	0.326354	0.550594	0.368141
lcl|NC_003279.8_cds_NP_001122506.1_2412	0.322384	0.572471	0.367841
lcl|NC_003279.8_cds_NP_001122507.1_2413	0.322151	0.571717	0.367419
lcl|NC_003279.8_cds_NP_001122508.1_2305	0.353219	0.600183	0.384446
lcl|NC_003279.8_cds_NP_001122509.1_2306	0.35696	0.603459	0.385329
lcl|NC_003279.8_cds_NP_001122510.1_2307	0.369725	0.649623	0.407798
lcl|NC_003279.8_cds_NP_001122511.1_956	0.382002	0.670255	0.413784
lcl|NC_003279.8_cds_NP_001122512.1_1199	0.355458	0.611048	0.387442
lcl|NC_003279.8_cds_NP_001122513.1_1198	0.35536	0.611332	0.388085
lcl|NC_003279.8_cds_NP_001122514.1_2777	0.359003	0.630004	0.389867
lcl|NC_003279.8_cds_NP_001122515.2_2595	0.363212	0.630964	0.395299
lcl|NC_003279.8_cds_NP_001122516.1_3727	0.355495	0.620749	0.389416
lcl|NC_003279.8_cds_NP_001122517.1_2536	0.351014	0.613368	0.389605
lcl|NC_003279.8_cds_NP_001122518.1_2353	0.353289	0.594987	0.382769
lcl|NC_003279.8_cds_NP_001122519.1_2360	0.314972	0.553049	0.360548
lcl|NC_003279.8_cds_NP_001122520.2_976	0.299817	0.527429	0.341905
lcl|NC_003279.8_cds_NP_001122521.1_1851	0.358194	0.644527	0.402521
lcl|NC_003279.8_cds_NP_001122522.1_2154	0.414624	0.650919	0.436443
lcl|NC_003279.8_cds_NP_001122523.1_3186	0.377509	0.694379	0.416467
lcl|NC_003279.8_cds_NP_001122524.1_3631	0.317879	0.561543	0.354136
lcl|NC_003279.8_cds_NP_001122525.1_3635	0.319768	0.502931	0.363202
lcl|NC_003279.8_cds_NP_001122526.1_1950	0.410913	0.709489	0.427559
lcl|NC_003279.8_cds_NP_001122527.1_810	0.31923	0.506859	0.345829
lcl|NC_003279.8_cds_NP_001122528.1_4152	0.332984	0.5231	0.364933
lcl|NC_003279.8_cds_NP_001122529.1_4153	0.332309	0.51886	0.364792
lcl|NC_003279.8_cds_NP_001122530.1_4159	0.32905	0.542707	0.368914
lcl|NC_003279.8_cds_NP_001122531.1_4173	0.310875	0.553521	0.350092
lcl|NC_003279.8_cds_NP_001122532.1_4174	0.310403	0.552699	0.349887
lcl|NC_003279.8_cds_NP_001122534.1_2878	0.366539	0.653275	0.402043
lcl|NC_003279.8_cds_NP_001122535.1_3814	0.281206	0.500924	0.32986
lcl|NC_003279.8_cds_NP_001122536.2_3825	0.329786	0.600781	0.358554
lcl|NC_003279.8_cds_NP_001122537.1_492	0.359346	0.607843	0.391666
lcl|NC_003279.8_cds_NP_001122538.2_4002	0.318301	0.581619	0.34962
lcl|NC_003279.8_cds_NP_001122539.2_859	0.344252	0.61255	0.374889
lcl|NC_003279.8_cds_NP_001122540.1_880	0.386043	0.661603	0.410233
lcl|NC_003279.8_cds_NP_001122541.1_872	0.341468	0.520477	0.373997
lcl|NC_003279.8_cds_NP_001122542.1_82	0.3268	0.536585	0.361825
lcl|NC_003279.8_cds_NP_001122543.1_83	0.327237	0.538173	0.362195
lcl|NC_003279.8_cds_NP_001122544.1_3479	0.343978	0.599467	0.3754
lcl|NC_003279.8_cds_NP_001122545.2_3249	0.319918	0.451204	0.365524
lcl|NC_003279.8_cds_NP_001122546.1_3251	0.31312	0.573693	0.372161
lcl|NC_003279.8_cds_NP_001122547.1_3250	0.314194	0.571544	0.372772
lcl|NC_003279.8_cds_NP_001122548.1_118	0.380293	0.632769	0.416843
lcl|NC_003279.8_cds_NP_001122549.1_119	0.360383	0.585399	0.410901
lcl|NC_003279.8_cds_NP_001122551.1_740	0.39224	0.60884	0.42317
lcl|NC_003279.8_cds_NP_001122552.1_743	0.316479	0.574503	0.361901
lcl|NC_003279.8_cds_NP_001122553.2_680	0.315346	0.507345	0.353001
lcl|NC_003279.8_cds_NP_001122554.2_451	0.311254	0.551829	0.34392
lcl|NC_003279.8_cds_NP_001122555.1_213	0.304247	0.486146	0.33707
lcl|NC_003279.8_cds_NP_001122556.1_226	0.345465	0.572191	0.372096
lcl|NC_003279.8_cds_NP_001122557.1_228	0.343393	0.569469	0.368761
lcl|NC_003279.8_cds_NP_001122558.1_227	0.34386	0.568214	0.369331
lcl|NC_003279.8_cds_NP_001122559.1_225	0.345958	0.57098	0.372708
lcl|NC_003279.8_cds_NP_001122560.2_3203	0.313619	0.559786	0.35942
lcl|NC_003279.8_cds_NP_001122561.1_1746	0.33478	0.621683	0.376342
lcl|NC_003279.8_cds_NP_001122562.1_4056	0.31324	0.571864	0.354054
lcl|NC_003279.8_cds_NP_001122563.1_2987	0.323293	0.582973	0.37288
lcl|NC_003279.8_cds_NP_001122564.1_2988	0.341794	0.645233	0.396224
lcl|NC_003279.8_cds_NP_001122565.1_3428	0.374809	0.642628	0.402578
lcl|NC_003279.8_cds_NP_001122566.1_3238	0.327801	0.595033	0.371373
lcl|NC_003279.8_cds_NP_001122567.1_1632	0.396901	0.63854	0.424908
lcl|NC_003279.8_cds_NP_001122568.1_1633	0.301873	0.555851	0.362315
lcl|NC_003279.8_cds_NP_001122569.1_4100	0.328472	0.504574	0.357502
lcl|NC_003279.8_cds_NP_001129748.1_3921	0.32763	0.570137	0.373052
lcl|NC_003279.8_cds_NP_001129749.1_2281	0.327189	0.533545	0.368711
lcl|NC_003279.8_cds_NP_001129750.1_3364	0.321973	0.557724	0.377605
lcl|NC_003279.8_cds_NP_001129751.1_3374	0.288111	0.491002	0.337594
lcl|NC_003279.8_cds_NP_001129752.1_2693	0.350026	0.563425	0.386846
lcl|NC_003279.8_cds_NP_001129753.1_2704	0.350766	0.606335	0.386143
lcl|NC_003279.8_cds_NP_001129754.1_1060	0.396957	0.676734	0.428675
lcl|NC_003279.8_cds_NP_001129755.1_2104	0.301775	0.518264	0.33675
lcl|NC_003279.8_cds_NP_001129756.1_2580	0.312996	0.576279	0.358252
lcl|NC_003279.8_cds_NP_001129757.1_2584	0.348704	0.613545	0.392253
lcl|NC_003279.8_cds_NP_001129758.1_1118	0.312693	0.550079	0.356415
lcl|NC_003279.8_cds_NP_001129760.1_2389	0.371387	0.698618	0.414094
lcl|NC_003279.8_cds_NP_001129761.1_2392	0.291326	0.532466	0.339498
lcl|NC_003279.8_cds_NP_001129762.1_2190	0.347451	0.598208	0.386884
lcl|NC_003279.8_cds_NP_001129763.1_2069	0.507015	0.89013	0.498605
lcl|NC_003279.8_cds_NP_001129764.1_2037	0.307508	0.570116	0.352366
lcl|NC_003279.8_cds_NP_001129765.1_2690	0.297864	0.534951	0.348472
lcl|NC_003279.8_cds_NP_001129766.1_3852	0.289563	0.563993	0.355208
lcl|NC_003279.8_cds_NP_001129767.1_2617	0.355697	0.60842	0.406454
lcl|NC_003279.8_cds_NP_001129768.1_3673	0.37322	0.609059	0.395227
lcl|NC_003279.8_cds_NP_001129769.1_3670	0.332524	0.553359	0.370458
lcl|NC_003279.8_cds_NP_001129770.1_4314	0.305105	0.534693	0.333268
lcl|NC_003279.8_cds_NP_001129771.1_3269	0.336909	0.572927	0.380492
lcl|NC_003279.8_cds_NP_001129772.1_2576	0.364104	0.651475	0.396941
lcl|NC_003279.8_cds_NP_001129774.1_4126	0.309855	0.544566	0.337427
lcl|NC_003279.8_cds_NP_001129775.1_2055	0.306981	0.546148	0.35705
lcl|NC_003279.8_cds_NP_001129776.1_2337	0.358002	0.637389	0.39494
lcl|NC_003279.8_cds_NP_001129777.2_2338	0.35623	0.637504	0.392832
lcl|NC_003279.8_cds_NP_001129778.1_3494	0.407045	0.494638	0.476206
lcl|NC_003279.8_cds_NP_001129779.1_3492	0.303816	0.525956	0.350314
lcl|NC_003279.8_cds_NP_001129780.1_3050	0.365474	0.711559	0.403946
lcl|NC_003279.8_cds_NP_001129781.1_2264	0.285728	0.549429	0.336592
lcl|NC_003279.8_cds_NP_001129783.1_3331	0.295893	0.52402	0.346632
lcl|NC_003279.8_cds_NP_001129784.1_3334	0.346018	0.587509	0.377966
lcl|NC_003279.8_cds_NP_001129785.1_2680	0.341273	0.621087	0.399827
lcl|NC_003279.8_cds_NP_001129786.2_2682	0.327775	0.557387	0.367188
lcl|NC_003279.8_cds_NP_001129787.1_3294	0.311513	0.5479	0.345038
lcl|NC_003279.8_cds_NP_001129788.1_2414	0.324245	0.581312	0.369193
lcl|NC_003279.8_cds_NP_001129789.2_3440	0.305368	0.561555	0.348632
lcl|NC_003279.8_cds_NP_001129790.1_3898	0.35219	0.59586	0.382262
lcl|NC_003279.8_cds_NP_001129792.1_2160	0.379211	0.596772	0.381662
lcl|NC_003279.8_cds_NP_001129794.1_3226	0.350434	0.59858	0.393662
lcl|NC_003279.8_cds_NP_001129795.1_4015	0.31601	0.508757	0.344326
lcl|NC_003279.8_cds_NP_001129796.1_4010	0.26838	0.419254	0.314657
lcl|NC_003279.8_cds_NP_001129797.1_4162	0.31207	0.54091	0.359242
lcl|NC_003279.8_cds_NP_001129798.1_1148	0.320327	0.564781	0.361231
lcl|NC_003279.8_cds_NP_001129799.1_2844	0.333634	0.600109	0.380958
lcl|NC_003279.8_cds_NP_001129801.1_3991	0.3406	0.690788	0.37392
lcl|NC_003279.8_cds_NP_001129802.1_4052	0.338488	0.609247	0.393952
lcl|NC_003279.8_cds_NP_001129803.1_2090	0.348992	0.594139	0.3847
lcl|NC_003279.8_cds_NP_001129804.1_2611	0.365988	0.664135	0.400269
lcl|NC_003279.8_cds_NP_001248789.2_24	0.329358	0.547843	0.375094
lcl|NC_003279.8_cds_NP_001248830.1_72	0.292839	0.494941	0.330559
lcl|NC_003279.8_cds_NP_001248847.1_93	0.32285	0.546647	0.360088
lcl|NC_003279.8_cds_NP_001248848.1_94	0.322925	0.5468	0.359886
lcl|NC_003279.8_cds_NP_001248866.1_120	0.37643	0.578989	0.406513
lcl|NC_003279.8_cds_NP_001248879.1_145	0.315806	0.542154	0.358416
lcl|NC_003279.8_cds_NP_001248880.1_146	0.315966	0.541452	0.358394
lcl|NC_003279.8_cds_NP_001248958.1_270	0.312607	0.584774	0.36285
lcl|NC_003279.8_cds_NP_001248959.1_271	0.322811	0.589258	0.371072
lcl|NC_003279.8_cds_NP_001248972.1_295	0.484377	0.823414	0.501562
lcl|NC_003279.8_cds_NP_001248981.1_315	0.285781	0.448787	0.326335
lcl|NC_003279.8_cds_NP_001248982.1_317	0.321748	0.526345	0.354114
lcl|NC_003279.8_cds_NP_001249009.1_359	0.290247	0.491921	0.332175
lcl|NC_003279.8_cds_NP_001249010.2_358	0.294051	0.510011	0.33578
lcl|NC_003279.8_cds_NP_001249029.1_388	0.313805	0.521361	0.348442
lcl|NC_003279.8_cds_NP_001249039.1_403	0.369546	0.632611	0.392183
lcl|NC_003279.8_cds_NP_001249078.1_454	0.314668	0.525589	0.342978
lcl|NC_003279.8_cds_NP_001249132.1_547	0.343106	0.552695	0.371948
lcl|NC_003279.8_cds_NP_001249133.1_548	0.34558	0.565355	0.374167
lcl|NC_003279.8_cds_NP_001249139.1_558	0.339547	0.560062	0.377828
lcl|NC_003279.8_cds_NP_001249145.1_566	0.312067	0.579579	0.35477
lcl|NC_003279.8_cds_NP_001249150.1_573	0.368416	0.616319	0.399538
lcl|NC_003279.8_cds_NP_001249151.1_574	0.369113	0.615098	0.400046
lcl|NC_003279.8_cds_NP_001249159.1_589	0.32607	0.551955	0.365733
lcl|NC_003279.8_cds_NP_001249160.1_590	0.343539	0.541614	0.380138
lcl|NC_003279.8_cds_NP_001249181.1_616	0.295615	0.53483	0.344686
lcl|NC_003279.8_cds_NP_001249242.1_698	0.344998	0.571438	0.384539
lcl|NC_003279.8_cds_NP_001249243.1_699	0.338514	0.555434	0.382575
lcl|NC_003279.8_cds_NP_001249244.2_700	0.333144	0.568774	0.376355
lcl|NC_003279.8_cds_NP_001249245.2_702	0.335722	0.574081	0.378641
lcl|NC_003279.8_cds_NP_001249296.1_762	0.317811	0.572745	0.353322
lcl|NC_003279.8_cds_NP_001249297.1_763	0.318607	0.57061	0.353799
lcl|NC_003279.8_cds_NP_001249306.1_772	0.31021	0.585667	0.358326
lcl|NC_003279.8_cds_NP_001249308.1_774	0.349923	0.628331	0.38395
lcl|NC_003279.8_cds_NP_001249353.1_826	0.352142	0.580965	0.390381
lcl|NC_003279.8_cds_NP_001249358.1_835	0.330804	0.548486	0.374029
lcl|NC_003279.8_cds_NP_001249361.1_834	0.329529	0.541139	0.373329
lcl|NC_003279.8_cds_NP_001249362.1_837	0.335799	0.547665	0.367632
lcl|NC_003279.8_cds_NP_001249366.1_842	0.419888	0.710217	0.451234
lcl|NC_003279.8_cds_NP_001249436.1_917	0.313005	0.566993	0.353454
lcl|NC_003279.8_cds_NP_001249512.1_999	0.32944	0.535253	0.36736
lcl|NC_003279.8_cds_NP_001249513.1_1000	0.344262	0.552445	0.37322
lcl|NC_003279.8_cds_NP_001249517.1_1004	0.331931	0.566532	0.369765
lcl|NC_003279.8_cds_NP_001249613.1_1115	0.335445	0.611032	0.387947
lcl|NC_003279.8_cds_NP_001249622.1_1126	0.338724	0.606822	0.382066
lcl|NC_003279.8_cds_NP_001249623.1_1127	0.349289	0.628053	0.391623
lcl|NC_003279.8_cds_NP_001249624.1_1128	0.34611	0.620556	0.391481
lcl|NC_003279.8_cds_NP_001249625.1_1125	0.345577	0.61919	0.389677
lcl|NC_003279.8_cds_NP_001249627.1_1131	0.321294	0.548013	0.354979
lcl|NC_003279.8_cds_NP_001249628.1_1133	0.310073	0.548677	0.352475
lcl|NC_003279.8_cds_NP_001249682.1_1188	0.339334	0.555833	0.405211
lcl|NC_003279.8_cds_NP_001249686.1_1195	0.308616	0.457141	0.350631
lcl|NC_003279.8_cds_NP_001249708.1_1217	0.338935	0.586397	0.380821
lcl|NC_003279.8_cds_NP_001249709.1_1218	0.336795	0.589146	0.381451
lcl|NC_003279.8_cds_NP_001249716.1_1226	0.383205	0.701585	0.418382
lcl|NC_003279.8_cds_NP_001249717.1_1227	0.383205	0.701585	0.418382
lcl|NC_003279.8_cds_NP_001249720.1_1233	0.297454	0.553563	0.340784
lcl|NC_003279.8_cds_NP_001249721.1_1234	0.300229	0.560329	0.338626
lcl|NC_003279.8_cds_NP_001249733.1_1247	0.340157	0.550462	0.376604
lcl|NC_003279.8_cds_NP_001249762.1_1282	0.309125	0.579314	0.359066
lcl|NC_003279.8_cds_NP_001249776.1_1296	0.318729	0.522541	0.356257
lcl|NC_003279.8_cds_NP_001249778.1_1298	0.318738	0.51762	0.353961
lcl|NC_003279.8_cds_NP_001249840.1_1367	0.331341	0.619297	0.370982
lcl|NC_003279.8_cds_NP_001249861.1_1389	0.301552	0.54825	0.405234
lcl|NC_003279.8_cds_NP_001249887.1_1415	0.329057	0.588461	0.370766
lcl|NC_003279.8_cds_NP_001249910.1_1438	0.323705	0.536352	0.373766
lcl|NC_003279.8_cds_NP_001249919.1_1450	0.323186	0.572083	0.359586
lcl|NC_003279.8_cds_NP_001249920.1_1451	0.35814	0.633961	0.396353
lcl|NC_003279.8_cds_NP_001249921.1_1452	0.285254	0.565196	0.332502
lcl|NC_003279.8_cds_NP_001249971.1_1504	0.333774	0.625596	0.378608
lcl|NC_003279.8_cds_NP_001249972.1_1505	0.329217	0.618107	0.375909
lcl|NC_003279.8_cds_NP_001249983.1_1516	0.305978	0.58479	0.36007
lcl|NC_003279.8_cds_NP_001250022.1_1570	0.457808	0.820598	0.476716
lcl|NC_003279.8_cds_NP_001250062.1_1610	0.363157	0.578254	0.391907
lcl|NC_003279.8_cds_NP_001250114.1_1662	0.348876	0.626156	0.395249
lcl|NC_003279.8_cds_NP_001250115.1_1663	0.344827	0.632874	0.398147
lcl|NC_003279.8_cds_NP_001250131.1_1679	0.301483	0.580921	0.356865
lcl|NC_003279.8_cds_NP_001250158.1_1705	0.313381	0.548895	0.355373
lcl|NC_003279.8_cds_NP_001250159.1_1706	0.311369	0.544053	0.352956
lcl|NC_003279.8_cds_NP_001250167.1_1714	0.330178	0.505189	0.360762
lcl|NC_003279.8_cds_NP_001250179.1_1727	0.43547	0.778701	0.433457
lcl|NC_003279.8_cds_NP_001250274.1_1833	0.340654	0.531395	0.387584
lcl|NC_003279.8_cds_NP_001250287.1_1850	0.357556	0.643408	0.401769
lcl|NC_003279.8_cds_NP_001250340.1_1905	0.351497	0.623028	0.386526
lcl|NC_003279.8_cds_NP_001250369.1_1934	0.347778	0.61458	0.387381
lcl|NC_003279.8_cds_NP_001250370.1_1935	0.358837	0.587821	0.394436
lcl|NC_003279.8_cds_NP_001250391.1_1962	0.350811	0.639434	0.388414
lcl|NC_003279.8_cds_NP_001250392.1_1963	0.348018	0.637008	0.388752
lcl|NC_003279.8_cds_NP_001250402.1_1975	0.327288	0.613075	0.430403
lcl|NC_003279.8_cds_NP_001250414.1_1987	0.316899	0.622311	0.374971
lcl|NC_003279.8_cds_NP_001250471.1_2048	0.396928	0.641853	0.415194
lcl|NC_003279.8_cds_NP_001250502.1_2077	0.333291	0.595897	0.377167
lcl|NC_003279.8_cds_NP_001250545.1_2129	0.315224	0.56706	0.366493
lcl|NC_003279.8_cds_NP_001250552.1_2138	0.386502	0.699406	0.4205
lcl|NC_003279.8_cds_NP_001250553.1_2139	0.421486	0.729803	0.452904
lcl|NC_003279.8_cds_NP_001250554.1_2140	0.427145	0.720649	0.471027
lcl|NC_003279.8_cds_NP_001250555.1_2141	0.331287	0.593826	0.373435
lcl|NC_003279.8_cds_NP_001250556.1_2142	0.330368	0.590475	0.372466
lcl|NC_003279.8_cds_NP_001250565.1_2152	0.328821	0.575388	0.359075
lcl|NC_003279.8_cds_NP_001250623.1_2213	0.324452	0.594928	0.358749
lcl|NC_003279.8_cds_NP_001250624.1_2214	0.328063	0.601231	0.363961
lcl|NC_003279.8_cds_NP_001250628.1_2219	0.330097	0.568774	0.364054
lcl|NC_003279.8_cds_NP_001250629.1_2220	0.344818	0.556127	0.368236
lcl|NC_003279.8_cds_NP_001250692.1_2292	0.30825	0.555889	0.35403
lcl|NC_003279.8_cds_NP_001250693.1_2295	0.308294	0.554736	0.354746
lcl|NC_003279.8_cds_NP_001250694.1_2296	0.307678	0.557927	0.35444
lcl|NC_003279.8_cds_NP_001250706.1_2309	0.33866	0.571152	0.381013
lcl|NC_003279.8_cds_NP_001250710.1_2315	0.334487	0.613538	0.368247
lcl|NC_003279.8_cds_NP_001250711.1_2316	0.341777	0.640241	0.371862
lcl|NC_003279.8_cds_NP_001250721.1_2326	0.322271	0.570778	0.366898
lcl|NC_003279.8_cds_NP_001250722.1_2327	0.313684	0.554001	0.348968
lcl|NC_003279.8_cds_NP_001250777.1_2383	0.404601	0.695874	0.435579
lcl|NC_003279.8_cds_NP_001250778.1_2384	0.411078	0.71884	0.442312
lcl|NC_003279.8_cds_NP_001250801.1_2406	0.311192	0.548271	0.352787
lcl|NC_003279.8_cds_NP_001250802.1_2407	0.310617	0.547809	0.352151
lcl|NC_003279.8_cds_NP_001250832.1_2437	0.324177	0.578381	0.352073
lcl|NC_003279.8_cds_NP_001250839.1_2444	0.33869	0.599614	0.376845
lcl|NC_003279.8_cds_NP_001250840.1_2445	0.324147	0.596617	0.365995
lcl|NC_003279.8_cds_NP_001250849.1_2454	0.348013	0.623414	0.365451
lcl|NC_003279.8_cds_NP_001250850.1_2455	0.307459	0.566504	0.334851
lcl|NC_003279.8_cds_NP_001250851.1_2456	0.322202	0.588085	0.343158
lcl|NC_003279.8_cds_NP_001250878.1_2487	0.327347	0.584822	0.374739
lcl|NC_003279.8_cds_NP_001250918.1_2527	0.318349	0.60096	0.386239
lcl|NC_003279.8_cds_NP_001250919.1_2528	0.321758	0.528928	0.374918
lcl|NC_003279.8_cds_NP_001250933.1_2542	0.317928	0.585094	0.369273
lcl|NC_003279.8_cds_NP_001250938.1_2547	0.374854	0.632039	0.411647
lcl|NC_003279.8_cds_NP_001250939.1_2548	0.391815	0.651937	0.427089
lcl|NC_003279.8_cds_NP_001250941.1_2550	0.377015	0.553044	0.426161
lcl|NC_003279.8_cds_NP_001250947.1_2556	0.325307	0.597575	0.382657
lcl|NC_003279.8_cds_NP_001250948.1_2557	0.33036	0.609968	0.383896
lcl|NC_003279.8_cds_NP_001250949.1_2558	0.33017	0.611582	0.383813
lcl|NC_003279.8_cds_NP_001251008.1_2619	0.348588	0.601096	0.384369
lcl|NC_003279.8_cds_NP_001251009.1_2620	0.353896	0.60934	0.384771
lcl|NC_003279.8_cds_NP_001251010.1_2621	0.504424	0.855458	0.506327
lcl|NC_003279.8_cds_NP_001251011.1_2622	0.505804	0.858219	0.507755
lcl|NC_003279.8_cds_NP_001251014.1_2625	0.386173	0.686585	0.422404
lcl|NC_003279.8_cds_NP_001251033.2_2646	0.324611	0.585752	0.371504
lcl|NC_003279.8_cds_NP_001251034.2_2647	0.32409	0.591471	0.370528
lcl|NC_003279.8_cds_NP_001251036.1_2649	0.311019	0.576482	0.35386
lcl|NC_003279.8_cds_NP_001251038.1_2652	0.330422	0.586263	0.377845
lcl|NC_003279.8_cds_NP_001251039.1_2653	0.32444	0.577209	0.370524
lcl|NC_003279.8_cds_NP_001251040.1_2654	0.328761	0.584839	0.375335
lcl|NC_003279.8_cds_NP_001251041.1_2655	0.325802	0.582175	0.373961
lcl|NC_003279.8_cds_NP_001251042.1_2656	0.329898	0.585181	0.376123
lcl|NC_003279.8_cds_NP_001251043.1_2657	0.327101	0.579892	0.373894
lcl|NC_003279.8_cds_NP_001251044.1_2658	0.330523	0.586098	0.377666
lcl|NC_003279.8_cds_NP_001251078.1_2694	0.343373	0.6342	0.390483
lcl|NC_003279.8_cds_NP_001251080.1_2696	0.343331	0.625261	0.379694
lcl|NC_003279.8_cds_NP_001251103.1_2719	0.295217	0.574393	0.341629
lcl|NC_003279.8_cds_NP_001251105.1_2721	0.373585	0.634466	0.39952
lcl|NC_003279.8_cds_NP_001251106.1_2722	0.373585	0.634466	0.39952
lcl|NC_003279.8_cds_NP_001251116.1_2731	0.395377	0.675948	0.430159
lcl|NC_003279.8_cds_NP_001251117.1_2732	0.400131	0.672789	0.427813
lcl|NC_003279.8_cds_NP_001251125.1_2740	0.317071	0.57005	0.36622
lcl|NC_003279.8_cds_NP_001251129.1_2744	0.337588	0.605525	0.379789
lcl|NC_003279.8_cds_NP_001251131.1_2746	0.338415	0.612931	0.381483
lcl|NC_003279.8_cds_NP_001251132.1_2747	0.343221	0.61636	0.386566
lcl|NC_003279.8_cds_NP_001251147.1_2762	0.303315	0.547749	0.357981
lcl|NC_003279.8_cds_NP_001251148.1_2764	0.336024	0.6407	0.385963
lcl|NC_003279.8_cds_NP_001251149.1_2765	0.395654	0.764546	0.441542
lcl|NC_003279.8_cds_NP_001251167.1_2786	0.35816	0.621953	0.401318
lcl|NC_003279.8_cds_NP_001251187.1_2807	0.33059	0.489394	0.352783
lcl|NC_003279.8_cds_NP_001251212.1_2833	0.473914	0.834537	0.481998
lcl|NC_003279.8_cds_NP_001251213.1_2834	0.473889	0.833285	0.482045
lcl|NC_003279.8_cds_NP_001251226.1_2847	0.33299	0.630618	0.363779
lcl|NC_003279.8_cds_NP_001251227.1_2848	0.33923	0.57637	0.352652
lcl|NC_003279.8_cds_NP_001251234.1_2855	0.336228	0.599833	0.375076
lcl|NC_003279.8_cds_NP_001251235.1_2857	0.31508	0.572799	0.353124
lcl|NC_003279.8_cds_NP_001251236.1_2856	0.317741	0.576289	0.354689
lcl|NC_003279.8_cds_NP_001251237.1_2858	0.313983	0.576183	0.351418
lcl|NC_003279.8_cds_NP_001251245.1_2866	0.393739	0.678364	0.419617
lcl|NC_003279.8_cds_NP_001251246.1_2867	0.393398	0.667862	0.421437
lcl|NC_003279.8_cds_NP_001251250.1_2871	0.348096	0.615169	0.38468
lcl|NC_003279.8_cds_NP_001251251.1_2872	0.35242	0.622181	0.388897
lcl|NC_003279.8_cds_NP_001251254.1_2875	0.309173	0.598716	0.355546
lcl|NC_003279.8_cds_NP_001251255.1_2876	0.311788	0.6114	0.359699
lcl|NC_003279.8_cds_NP_001251277.1_2902	0.379691	0.62078	0.414112
lcl|NC_003279.8_cds_NP_001251278.1_2903	0.388806	0.654861	0.415738
lcl|NC_003279.8_cds_NP_001251292.1_2917	0.371514	0.682632	0.408706
lcl|NC_003279.8_cds_NP_001251317.2_2946	0.330544	0.60036	0.368709
lcl|NC_003279.8_cds_NP_001251318.1_2945	0.356594	0.629141	0.388467
lcl|NC_003279.8_cds_NP_001251326.1_2957	0.335765	0.609064	0.382341
lcl|NC_003279.8_cds_NP_001251327.1_2958	0.334475	0.606786	0.380842
lcl|NC_003279.8_cds_NP_001251356.1_2991	0.337709	0.582539	0.37416
lcl|NC_003279.8_cds_NP_001251357.1_2992	0.338228	0.589058	0.374703
lcl|NC_003279.8_cds_NP_001251358.1_2993	0.342727	0.601499	0.378315
lcl|NC_003279.8_cds_NP_001251364.1_2999	0.346785	0.613555	0.390596
lcl|NC_003279.8_cds_NP_001251370.1_3009	0.323214	0.560812	0.374697
lcl|NC_003279.8_cds_NP_001251371.1_3010	0.321807	0.558091	0.373413
lcl|NC_003279.8_cds_NP_001251372.1_3011	0.373407	0.573616	0.399048
lcl|NC_003279.8_cds_NP_001251397.1_3047	0.356301	0.637525	0.388201
lcl|NC_003279.8_cds_NP_001251398.1_3048	0.34048	0.610518	0.375907
lcl|NC_003279.8_cds_NP_001251401.1_3051	0.418275	0.781023	0.448428
lcl|NC_003279.8_cds_NP_001251433.1_3084	0.306351	0.530215	0.357851
lcl|NC_003279.8_cds_NP_001251442.2_3096	0.309242	0.533928	0.348182
lcl|NC_003279.8_cds_NP_001251443.1_3095	0.303717	0.537879	0.34871
lcl|NC_003279.8_cds_NP_001251445.1_3098	0.344088	0.548577	0.369177
lcl|NC_003279.8_cds_NP_001251447.1_3100	0.345616	0.54733	0.371111
lcl|NC_003279.8_cds_NP_001251450.1_3103	0.33158	0.592706	0.369981
lcl|NC_003279.8_cds_NP_001251455.1_3108	0.323652	0.580891	0.364603
lcl|NC_003279.8_cds_NP_001251456.1_3109	0.323788	0.581424	0.364337
lcl|NC_003279.8_cds_NP_001251466.1_3119	0.385189	0.639323	0.418283
lcl|NC_003279.8_cds_NP_001251467.1_3120	0.338753	0.604345	0.378846
lcl|NC_003279.8_cds_NP_001251490.1_3139	0.352529	0.626666	0.393078
lcl|NC_003279.8_cds_NP_001251492.1_3149	0.364323	0.637715	0.40322
lcl|NC_003279.8_cds_NP_001251514.1_3172	0.366142	0.641286	0.409326
lcl|NC_003279.8_cds_NP_001251515.2_3171	0.364791	0.642305	0.40829
lcl|NC_003279.8_cds_NP_001251523.1_3181	0.315231	0.591839	0.364981
lcl|NC_003279.8_cds_NP_001251524.1_3180	0.318339	0.586926	0.363117
lcl|NC_003279.8_cds_NP_001251536.1_3194	0.311347	0.465585	0.344693
lcl|NC_003279.8_cds_NP_001251556.1_3220	0.366881	0.524295	0.388363
lcl|NC_003279.8_cds_NP_001251557.1_3221	0.335707	0.510354	0.349801
lcl|NC_003279.8_cds_NP_001251561.1_3227	0.345321	0.58794	0.389027
lcl|NC_003279.8_cds_NP_001251562.1_3228	0.344656	0.589626	0.388853
lcl|NC_003279.8_cds_NP_001251579.1_3245	0.314379	0.580354	0.350408
lcl|NC_003279.8_cds_NP_001251580.1_3246	0.301297	0.56782	0.33917
lcl|NC_003279.8_cds_NP_001251581.1_3247	0.329173	0.536272	0.360655
lcl|NC_003279.8_cds_NP_001251586.1_3252	0.342684	0.558494	0.370304
lcl|NC_003279.8_cds_NP_001251587.1_3253	0.34219	0.558964	0.368395
lcl|NC_003279.8_cds_NP_001251588.1_3254	0.357156	0.563587	0.372701
lcl|NC_003279.8_cds_NP_001251596.1_3264	0.309697	0.538674	0.346625
lcl|NC_003279.8_cds_NP_001251601.1_3271	0.339282	0.607167	0.368324
lcl|NC_003279.8_cds_NP_001251602.1_3272	0.339282	0.607167	0.368324
lcl|NC_003279.8_cds_NP_001251605.1_3276	0.304426	0.530433	0.350145
lcl|NC_003279.8_cds_NP_001251608.1_3279	0.276361	0.523417	0.318486
lcl|NC_003279.8_cds_NP_001251617.1_3288	0.351345	0.568908	0.378124
lcl|NC_003279.8_cds_NP_001251622.1_3293	0.321999	0.590878	0.361304
lcl|NC_003279.8_cds_NP_001251634.1_3305	0.346292	0.556686	0.390155
lcl|NC_003279.8_cds_NP_001251665.1_3341	0.324321	0.546413	0.360577
lcl|NC_003279.8_cds_NP_001251666.1_3342	0.33664	0.548089	0.374871
lcl|NC_003279.8_cds_NP_001251667.1_3343	0.36179	0.583033	0.400028
lcl|NC_003279.8_cds_NP_001251691.1_3378	0.360676	0.602507	0.3969
lcl|NC_003279.8_cds_NP_001251696.1_3385	0.312063	0.541955	0.370533
lcl|NC_003279.8_cds_NP_001251702.1_3391	0.302901	0.587706	0.348915
lcl|NC_003279.8_cds_NP_001251705.1_3396	0.362817	0.593137	0.404866
lcl|NC_003279.8_cds_NP_001251731.1_3435	0.307801	0.586691	0.350719
lcl|NC_003279.8_cds_NP_001251732.1_3436	0.305402	0.577253	0.346794
lcl|NC_003279.8_cds_NP_001251733.1_3437	0.299613	0.578374	0.342671
lcl|NC_003279.8_cds_NP_001251734.1_3438	0.308619	0.593771	0.353332
lcl|NC_003279.8_cds_NP_001251761.1_3468	0.307788	0.50439	0.350599
lcl|NC_003279.8_cds_NP_001251762.1_3469	0.342449	0.554625	0.387712
lcl|NC_003279.8_cds_NP_001251914.1_3645	0.329192	0.50555	0.362813
lcl|NC_003279.8_cds_NP_001251918.1_3649	0.325516	0.513421	0.363235
lcl|NC_003279.8_cds_NP_001251919.1_3650	0.322448	0.508001	0.362821
lcl|NC_003279.8_cds_NP_001251921.1_3652	0.320695	0.514193	0.366567
lcl|NC_003279.8_cds_NP_001251922.1_3653	0.358761	0.588344	0.392344
lcl|NC_003279.8_cds_NP_001251923.1_3654	0.381569	0.601046	0.411411
lcl|NC_003279.8_cds_NP_001251924.1_3655	0.373496	0.606388	0.397553
lcl|NC_003279.8_cds_NP_001251925.1_3656	0.366449	0.598358	0.390335
lcl|NC_003279.8_cds_NP_001251926.1_3657	0.371548	0.605903	0.394089
lcl|NC_003279.8_cds_NP_001251937.1_3671	0.333207	0.599018	0.369576
lcl|NC_003279.8_cds_NP_001252032.1_3782	0.326452	0.576773	0.369724
lcl|NC_003279.8_cds_NP_001252047.1_3797	0.310759	0.490014	0.346815
lcl|NC_003279.8_cds_NP_001252048.1_3798	0.313782	0.489059	0.348513
lcl|NC_003279.8_cds_NP_001252049.1_3799	0.280956	0.42807	0.313776
lcl|NC_003279.8_cds_NP_001252050.1_3800	0.315613	0.490641	0.353196
lcl|NC_003279.8_cds_NP_001252051.1_3801	0.318915	0.506139	0.351711
lcl|NC_003279.8_cds_NP_001252052.1_3802	0.32485	0.540346	0.367203
lcl|NC_003279.8_cds_NP_001252053.1_3803	0.330112	0.541035	0.370243
lcl|NC_003279.8_cds_NP_001252085.1_3846	0.327683	0.534665	0.35833
lcl|NC_003279.8_cds_NP_001252086.1_3847	0.325212	0.530565	0.356618
lcl|NC_003279.8_cds_NP_001252087.1_3848	0.322663	0.521676	0.354725
lcl|NC_003279.8_cds_NP_001252088.2_3850	0.325754	0.542719	0.356191
lcl|NC_003279.8_cds_NP_001252089.1_3851	0.320495	0.527046	0.352688
lcl|NC_003279.8_cds_NP_001252092.1_3854	0.307243	0.506382	0.367285
lcl|NC_003279.8_cds_NP_001252095.1_3857	0.328424	0.58889	0.375778
lcl|NC_003279.8_cds_NP_001252096.1_3858	0.31782	0.550096	0.36423
lcl|NC_003279.8_cds_NP_001252131.1_3899	0.351076	0.616438	0.394371
lcl|NC_003279.8_cds_NP_001252133.1_3901	0.343253	0.581479	0.395836
lcl|NC_003279.8_cds_NP_001252134.1_3902	0.322805	0.57361	0.380133
lcl|NC_003279.8_cds_NP_001252138.1_3907	0.442191	0.706224	0.468971
lcl|NC_003279.8_cds_NP_001252140.1_3908	0.308779	0.493888	0.348209
lcl|NC_003279.8_cds_NP_001252141.1_3909	0.310364	0.436405	0.352037
lcl|NC_003279.8_cds_NP_001252143.1_3911	0.324898	0.519219	0.376675
lcl|NC_003279.8_cds_NP_001252144.1_3912	0.328096	0.516671	0.376922
lcl|NC_003279.8_cds_NP_001252145.1_3913	0.327202	0.510043	0.376963
lcl|NC_003279.8_cds_NP_001252154.1_3922	0.304066	0.50872	0.340853
lcl|NC_003279.8_cds_NP_001252155.1_3923	0.326182	0.585778	0.361844
lcl|NC_003279.8_cds_NP_001252156.1_3924	0.335817	0.541446	0.362209
lcl|NC_003279.8_cds_NP_001252157.1_3925	0.362644	0.575116	0.373353
lcl|NC_003279.8_cds_NP_001252158.1_3926	0.293872	0.470551	0.329479
lcl|NC_003279.8_cds_NP_001252159.1_3928	0.294136	0.487999	0.336376
lcl|NC_003279.8_cds_NP_001252168.1_3937	0.310838	0.531745	0.344823
lcl|NC_003279.8_cds_NP_001252169.1_3938	0.301894	0.518318	0.33693
lcl|NC_003279.8_cds_NP_001252171.1_3940	0.361108	0.637162	0.401124
lcl|NC_003279.8_cds_NP_001252172.1_3941	0.377254	0.683117	0.414556
lcl|NC_003279.8_cds_NP_001252179.1_3948	0.309627	0.514293	0.349245
lcl|NC_003279.8_cds_NP_001252206.1_3974	0.323966	0.538508	0.355587
lcl|NC_003279.8_cds_NP_001252207.1_3975	0.335709	0.545561	0.363536
lcl|NC_003279.8_cds_NP_001252208.1_3976	0.33062	0.550142	0.35933
lcl|NC_003279.8_cds_NP_001252210.1_3979	0.329796	0.57616	0.362371
lcl|NC_003279.8_cds_NP_001252220.1_3990	0.340192	0.585436	0.372783
lcl|NC_003279.8_cds_NP_001252247.1_4020	0.355494	0.624602	0.385346
lcl|NC_003279.8_cds_NP_001252248.1_4021	0.325027	0.523715	0.36295
lcl|NC_003279.8_cds_NP_001252249.1_4022	0.316044	0.505481	0.353372
lcl|NC_003279.8_cds_NP_001252256.1_4029	0.296782	0.521762	0.347192
lcl|NC_003279.8_cds_NP_001252257.1_4030	0.287375	0.558433	0.349591
lcl|NC_003279.8_cds_NP_001252258.1_4031	0.35805	0.580293	0.397287
lcl|NC_003279.8_cds_NP_001252262.1_4037	0.34027	0.57602	0.366992
lcl|NC_003279.8_cds_NP_001252264.2_4044	0.315392	0.553548	0.348001
lcl|NC_003279.8_cds_NP_001252265.2_4045	0.315578	0.553497	0.348296
lcl|NC_003279.8_cds_NP_001252300.1_4089	0.450084	0.726683	0.473165
lcl|NC_003279.8_cds_NP_001252301.1_4090	0.474048	0.773512	0.493905
lcl|NC_003279.8_cds_NP_001252303.1_4092	0.383719	0.606567	0.414212
lcl|NC_003279.8_cds_NP_001252349.1_4142	0.311163	0.50953	0.351416
lcl|NC_003279.8_cds_NP_001252361.1_4155	0.350106	0.61898	0.376192
lcl|NC_003279.8_cds_NP_001252362.1_4156	0.383911	0.629652	0.396817
lcl|NC_003279.8_cds_NP_001252371.1_4165	0.334134	0.589162	0.375136
lcl|NC_003279.8_cds_NP_001252372.1_4166	0.339188	0.59079	0.376126
lcl|NC_003279.8_cds_NP_001252376.1_4170	0.313552	0.529528	0.355307
lcl|NC_003279.8_cds_NP_001252377.1_4171	0.311443	0.525259	0.353052
lcl|NC_003279.8_cds_NP_001252378.1_4172	0.309057	0.520401	0.35104
lcl|NC_003279.8_cds_NP_001252399.1_4209	0.319551	0.579559	0.368633
lcl|NC_003279.8_cds_NP_001252408.1_4221	0.317096	0.509091	0.359807
lcl|NC_003279.8_cds_NP_001252409.1_4222	0.324017	0.522494	0.356672
lcl|NC_003279.8_cds_NP_001252410.1_4223	0.314998	0.526068	0.357405
lcl|NC_003279.8_cds_NP_001252411.1_4224	0.34512	0.58247	0.389227
lcl|NC_003279.8_cds_NP_001252414.1_4226	0.329868	0.490129	0.360303
lcl|NC_003279.8_cds_NP_001252415.1_4227	0.29165	0.439142	0.323585
lcl|NC_003279.8_cds_NP_001252416.1_4228	0.263087	0.368329	0.277355
lcl|NC_003279.8_cds_NP_001252425.1_4237	0.343947	0.611995	0.376615
lcl|NC_003279.8_cds_NP_001252426.1_4238	0.345271	0.612797	0.37725
lcl|NC_003279.8_cds_NP_001252431.1_4243	0.316687	0.538346	0.348034
lcl|NC_003279.8_cds_NP_001252456.1_4272	0.37879	0.592999	0.40458
lcl|NC_003279.8_cds_NP_001254005.1_2151	0.314184	0.548223	0.348546
lcl|NC_003279.8_cds_NP_001254006.1_3906	0.426019	0.722115	0.44933
lcl|NC_003279.8_cds_NP_001263448.1_1378	0.336697	0.531923	0.381673
lcl|NC_003279.8_cds_NP_001263449.1_1580	0.317921	0.585784	0.358106
lcl|NC_003279.8_cds_NP_001263451.1_1938	0.357302	0.657804	0.393999
lcl|NC_003279.8_cds_NP_001263452.1_1939	0.35297	0.652879	0.393119
lcl|NC_003279.8_cds_NP_001263461.1_2289	0.330422	0.6084	0.373751
lcl|NC_003279.8_cds_NP_001263463.1_2608	0.339712	0.616097	0.387864
lcl|NC_003279.8_cds_NP_001263470.1_2962	0.318143	0.482692	0.359824
lcl|NC_003279.8_cds_NP_001263474.1_2983	0.353864	0.590867	0.402244
lcl|NC_003279.8_cds_NP_001263476.1_3018	0.531827	0.876784	0.514199
lcl|NC_003279.8_cds_NP_001263477.1_3021	0.317469	0.536583	0.347086
lcl|NC_003279.8_cds_NP_001263478.1_3022	0.320119	0.544502	0.350713
lcl|NC_003279.8_cds_NP_001263479.1_3023	0.314878	0.53442	0.346444
lcl|NC_003279.8_cds_NP_001263480.1_3025	0.318988	0.547483	0.350306
lcl|NC_003279.8_cds_NP_001263481.1_3026	0.321891	0.554786	0.354044
lcl|NC_003279.8_cds_NP_001263482.1_3027	0.315564	0.543294	0.349066
lcl|NC_003279.8_cds_NP_001263483.1_3028	0.31879	0.550637	0.352626
lcl|NC_003279.8_cds_NP_001263487.1_3213	0.344895	0.503696	0.362518
lcl|NC_003279.8_cds_NP_001263488.1_3214	0.291915	0.530747	0.325176
lcl|NC_003279.8_cds_NP_001263496.1_3309	0.2927	0.53285	0.347242
lcl|NC_003279.8_cds_NP_001263510.1_3430	0.295061	0.46576	0.344676
lcl|NC_003279.8_cds_NP_001263511.1_3431	0.28947	0.462693	0.337056
lcl|NC_003279.8_cds_NP_001263512.1_3432	0.284291	0.45743	0.332182
lcl|NC_003279.8_cds_NP_001263527.1_3526	0.347513	0.588062	0.373443
lcl|NC_003279.8_cds_NP_001263528.1_3527	0.340724	0.584264	0.366036
lcl|NC_003279.8_cds_NP_001263529.1_3528	0.351605	0.601133	0.376185
lcl|NC_003279.8_cds_NP_001263530.1_3529	0.352468	0.601418	0.37633
lcl|NC_003279.8_cds_NP_001263531.1_3530	0.340676	0.548859	0.371976
lcl|NC_003279.8_cds_NP_001263539.1_3629	0.300298	0.495879	0.352964
lcl|NC_003279.8_cds_NP_001263565.1_3828	0.308628	0.545551	0.343649
lcl|NC_003279.8_cds_NP_001263575.1_3951	0.351667	0.582351	0.384635
lcl|NC_003279.8_cds_NP_001263581.1_4035	0.531744	0.881608	0.512219
lcl|NC_003279.8_cds_NP_001263582.1_4036	0.550122	0.903723	0.523488
lcl|NC_003279.8_cds_NP_001263593.1_4132	0.38357	0.608889	0.422753
lcl|NC_003279.8_cds_NP_001263595.1_4194	0.507646	0.847863	0.504853
lcl|NC_003279.8_cds_NP_001263596.1_4198	0.493955	0.833421	0.493976
lcl|NC_003279.8_cds_NP_001263597.1_4199	0.508026	0.856694	0.500419
lcl|NC_003279.8_cds_NP_001293152.1_1021	0.297228	0.529434	0.353347
lcl|NC_003279.8_cds_NP_001293153.1_2086	0.334998	0.587648	0.374248
lcl|NC_003279.8_cds_NP_001293154.1_3735	0.344701	0.578942	0.384294
lcl|NC_003279.8_cds_NP_001293155.1_3738	0.361276	0.662486	0.409001
lcl|NC_003279.8_cds_NP_001293156.1_3736	0.333348	0.611406	0.375648
lcl|NC_003279.8_cds_NP_001293157.1_267	0.368478	0.615658	0.391718
lcl|NC_003279.8_cds_NP_001293158.1_3353	0.317801	0.527222	0.363506
lcl|NC_003279.8_cds_NP_001293159.1_3354	0.329026	0.527469	0.368687
lcl|NC_003279.8_cds_NP_001293160.1_4210	0.321456	0.58326	0.369399
lcl|NC_003279.8_cds_NP_001293161.1_4213	0.334977	0.60304	0.380453
lcl|NC_003279.8_cds_NP_001293162.1_15	0.298552	0.510941	0.337391
lcl|NC_003279.8_cds_NP_001293163.1_17	0.320864	0.52142	0.350382
lcl|NC_003279.8_cds_NP_001293164.1_13	0.309073	0.560171	0.353535
lcl|NC_003279.8_cds_NP_001293165.1_18	0.324149	0.540359	0.356034
lcl|NC_003279.8_cds_NP_001293166.1_21	0.302416	0.464731	0.326203
lcl|NC_003279.8_cds_NP_001293167.1_25	0.340812	0.551574	0.376148
lcl|NC_003279.8_cds_NP_001293168.1_26	0.340695	0.552048	0.376214
lcl|NC_003279.8_cds_NP_001293169.1_180	0.320772	0.523817	0.348022
lcl|NC_003279.8_cds_NP_001293170.1_179	0.322976	0.530221	0.349748
lcl|NC_003279.8_cds_NP_001293171.1_178	0.323067	0.536421	0.349536
lcl|NC_003279.8_cds_NP_001293172.1_176	0.317402	0.531833	0.348381
lcl|NC_003279.8_cds_NP_001293173.1_185	0.351296	0.562595	0.379931
lcl|NC_003279.8_cds_NP_001293174.1_184	0.339234	0.535736	0.366042
lcl|NC_003279.8_cds_NP_001293175.1_186	0.345942	0.514333	0.36679
lcl|NC_003279.8_cds_NP_001293176.1_182	0.327359	0.521391	0.341408
lcl|NC_003279.8_cds_NP_001293177.1_194	0.337815	0.593983	0.377456
lcl|NC_003279.8_cds_NP_001293178.1_168	0.345625	0.543529	0.387305
lcl|NC_003279.8_cds_NP_001293179.1_169	0.321618	0.504787	0.364922
lcl|NC_003279.8_cds_NP_001293180.1_170	0.346614	0.52014	0.384236
lcl|NC_003279.8_cds_NP_001293181.1_190	0.348417	0.46699	0.398926
lcl|NC_003279.8_cds_NP_001293182.1_191	0.345603	0.446825	0.399086
lcl|NC_003279.8_cds_NP_001293183.1_188	0.316585	0.581595	0.352454
lcl|NC_003279.8_cds_NP_001293184.1_107	0.384077	0.662221	0.402932
lcl|NC_003279.8_cds_NP_001293185.1_103	0.350451	0.499123	0.380058
lcl|NC_003279.8_cds_NP_001293186.1_222	0.36248	0.615542	0.393051
lcl|NC_003279.8_cds_NP_001293187.1_223	0.367996	0.618085	0.395763
lcl|NC_003279.8_cds_NP_001293188.1_214	0.306018	0.505213	0.34815
lcl|NC_003279.8_cds_NP_001293189.1_215	0.294015	0.473946	0.33458
lcl|NC_003279.8_cds_NP_001293190.1_212	0.321029	0.522319	0.351492
lcl|NC_003279.8_cds_NP_001293191.1_218	0.329086	0.567724	0.365602
lcl|NC_003279.8_cds_NP_001293192.1_220	0.330606	0.536903	0.365306
lcl|NC_003279.8_cds_NP_001293193.1_112	0.367533	0.615262	0.398591
lcl|NC_003279.8_cds_NP_001293194.1_109	0.315635	0.541212	0.347345
lcl|NC_003279.8_cds_NP_001293195.1_117	0.384027	0.620454	0.410754
lcl|NC_003279.8_cds_NP_001293196.1_115	0.382321	0.617925	0.409986
lcl|NC_003279.8_cds_NP_001293197.1_114	0.314164	0.542708	0.352746
lcl|NC_003279.8_cds_NP_001293198.1_246	0.344787	0.589154	0.413424
lcl|NC_003279.8_cds_NP_001293199.1_277	0.352351	0.56867	0.37809
lcl|NC_003279.8_cds_NP_001293200.1_273	0.319821	0.565845	0.360066
lcl|NC_003279.8_cds_NP_001293201.1_274	0.325659	0.568389	0.361907
lcl|NC_003279.8_cds_NP_001293202.1_275	0.322932	0.607662	0.374877
lcl|NC_003279.8_cds_NP_001293203.1_2297	0.314584	0.560507	0.362447
lcl|NC_003279.8_cds_NP_001293204.1_2291	0.312835	0.550787	0.357677
lcl|NC_003279.8_cds_NP_001293205.1_2293	0.31281	0.559206	0.359366
lcl|NC_003279.8_cds_NP_001293206.1_3	0.378267	0.654985	0.390931
lcl|NC_003279.8_cds_NP_001293207.1_6	0.348833	0.5999	0.384598
lcl|NC_003279.8_cds_NP_001293208.1_7	0.365992	0.604988	0.397068
lcl|NC_003279.8_cds_NP_001293209.1_150	0.334877	0.525039	0.369348
lcl|NC_003279.8_cds_NP_001293210.1_148	0.329356	0.525047	0.360718
lcl|NC_003279.8_cds_NP_001293211.1_149	0.330038	0.526169	0.36369
lcl|NC_003279.8_cds_NP_001293212.1_144	0.335962	0.612304	0.371388
lcl|NC_003279.8_cds_NP_001293213.1_43	0.348669	0.585317	0.380468
lcl|NC_003279.8_cds_NP_001293214.1_49	0.323537	0.554071	0.356279
lcl|NC_003279.8_cds_NP_001293215.1_50	0.325527	0.551774	0.358743
lcl|NC_003279.8_cds_NP_001293216.1_64	0.29395	0.510936	0.339678
lcl|NC_003279.8_cds_NP_001293217.1_65	0.291677	0.508168	0.335579
lcl|NC_003279.8_cds_NP_001293218.1_68	0.300502	0.514654	0.341357
lcl|NC_003279.8_cds_NP_001293219.1_69	0.295749	0.486073	0.345785
lcl|NC_003279.8_cds_NP_001293220.1_66	0.278317	0.468497	0.335682
lcl|NC_003279.8_cds_NP_001293221.1_75	0.32669	0.505075	0.357865
lcl|NC_003279.8_cds_NP_001293222.1_291	0.37656	0.628621	0.406736
lcl|NC_003279.8_cds_NP_001293223.1_292	0.377768	0.639567	0.412697
lcl|NC_003279.8_cds_NP_001293224.1_293	0.380811	0.624468	0.413764
lcl|NC_003279.8_cds_NP_001293225.1_278	0.322903	0.563376	0.365709
lcl|NC_003279.8_cds_NP_001293226.1_279	0.321208	0.560581	0.363116
lcl|NC_003279.8_cds_NP_001293227.1_280	0.320104	0.557835	0.361968
lcl|NC_003279.8_cds_NP_001293228.1_281	0.321629	0.558055	0.361779
lcl|NC_003279.8_cds_NP_001293229.1_282	0.348034	0.547023	0.377069
lcl|NC_003279.8_cds_NP_001293230.1_287	0.327551	0.534935	0.360404
lcl|NC_003279.8_cds_NP_001293231.1_288	0.319153	0.531598	0.351506
lcl|NC_003279.8_cds_NP_001293232.1_88	0.379241	0.63175	0.415054
lcl|NC_003279.8_cds_NP_001293233.1_200	0.334195	0.544774	0.368258
lcl|NC_003279.8_cds_NP_001293234.1_201	0.336413	0.544086	0.367469
lcl|NC_003279.8_cds_NP_001293235.1_202	0.335949	0.543893	0.367302
lcl|NC_003279.8_cds_NP_001293236.1_203	0.33509	0.542837	0.366879
lcl|NC_003279.8_cds_NP_001293237.1_204	0.334253	0.536526	0.366905
lcl|NC_003279.8_cds_NP_001293238.1_205	0.33973	0.555853	0.374246
lcl|NC_003279.8_cds_NP_001293239.1_3348	0.340574	0.572387	0.371235
lcl|NC_003279.8_cds_NP_001293240.1_3350	0.335671	0.565152	0.368516
lcl|NC_003279.8_cds_NP_001293241.1_3351	0.328969	0.561423	0.363935
lcl|NC_003279.8_cds_NP_001293242.1_3345	0.340072	0.571376	0.370866
lcl|NC_003279.8_cds_NP_001293243.1_3347	0.340506	0.572434	0.371157
lcl|NC_003279.8_cds_NP_001293244.1_3349	0.335557	0.565184	0.368397
lcl|NC_003279.8_cds_NP_001293245.1_157	0.323552	0.562066	0.369291
lcl|NC_003279.8_cds_NP_001293246.1_158	0.318301	0.552986	0.364342
lcl|NC_003279.8_cds_NP_001293247.1_155	0.396821	0.627756	0.416742
lcl|NC_003279.8_cds_NP_001293248.1_161	0.30018	0.506537	0.357233
lcl|NC_003279.8_cds_NP_001293249.1_164	0.377402	0.560784	0.413707
lcl|NC_003279.8_cds_NP_001293250.1_165	0.353253	0.531856	0.388783
lcl|NC_003279.8_cds_NP_001293251.1_236	0.316234	0.562353	0.344321
lcl|NC_003279.8_cds_NP_001293252.1_251	0.326394	0.54899	0.355382
lcl|NC_003279.8_cds_NP_001293253.1_253	0.324381	0.54343	0.354247
lcl|NC_003279.8_cds_NP_001293254.1_255	0.340919	0.561571	0.370586
lcl|NC_003279.8_cds_NP_001293255.1_256	0.340258	0.53531	0.368885
lcl|NC_003279.8_cds_NP_001293256.1_252	0.325873	0.548353	0.354938
lcl|NC_003279.8_cds_NP_001293257.1_254	0.323802	0.542711	0.353754
lcl|NC_003279.8_cds_NP_001293258.1_258	0.332174	0.52419	0.375031
lcl|NC_003279.8_cds_NP_001293259.1_259	0.401104	0.574231	0.437255
lcl|NC_003279.8_cds_NP_001293260.1_263	0.320828	0.487603	0.347956
lcl|NC_003279.8_cds_NP_001293261.1_79	0.344562	0.551486	0.377303
lcl|NC_003279.8_cds_NP_001293262.1_96	0.303732	0.554115	0.351912
lcl|NC_003279.8_cds_NP_001293263.1_37	0.367075	0.619068	0.39586
lcl|NC_003279.8_cds_NP_001293264.1_33	0.430417	0.532386	0.47613
lcl|NC_003279.8_cds_NP_001293265.1_29	0.333562	0.55215	0.358774
lcl|NC_003279.8_cds_NP_001293266.1_137	0.333344	0.605934	0.380021
lcl|NC_003279.8_cds_NP_001293267.1_136	0.332271	0.606425	0.379989
lcl|NC_003279.8_cds_NP_001293268.1_132	0.323152	0.588128	0.367857
lcl|NC_003279.8_cds_NP_001293269.1_135	0.323068	0.572904	0.36557
lcl|NC_003279.8_cds_NP_001293270.1_134	0.32262	0.575379	0.366436
lcl|NC_003279.8_cds_NP_001293271.1_129	0.355905	0.607959	0.390664
lcl|NC_003279.8_cds_NP_001293272.1_130	0.35756	0.609283	0.391958
lcl|NC_003279.8_cds_NP_001293273.1_125	0.51419	0.82678	0.506455
lcl|NC_003279.8_cds_NP_001293274.1_126	0.463156	0.753214	0.465421
lcl|NC_003279.8_cds_NP_001293275.1_141	0.497623	0.769298	0.498753
lcl|NC_003279.8_cds_NP_001293276.1_2965	0.309954	0.543919	0.346537
lcl|NC_003279.8_cds_NP_001293277.1_121	0.390317	0.664304	0.407985
lcl|NC_003279.8_cds_NP_001293278.1_3201	0.322624	0.522284	0.366312
lcl|NC_003279.8_cds_NP_001293279.1_508	0.353165	0.54645	0.36932
lcl|NC_003279.8_cds_NP_001293280.1_1874	0.345871	0.57359	0.377917
lcl|NC_003279.8_cds_NP_001293281.1_1875	0.350171	0.570234	0.384289
lcl|NC_003279.8_cds_NP_001293282.1_2131	0.319794	0.580091	0.370205
lcl|NC_003279.8_cds_NP_001293283.1_2132	0.319301	0.580184	0.370227
lcl|NC_003279.8_cds_NP_001293284.1_603	0.416316	0.673895	0.448615
lcl|NC_003279.8_cds_NP_001293285.1_600	0.279909	0.469336	0.316702
lcl|NC_003279.8_cds_NP_001293286.1_634	0.308114	0.428785	0.3256
lcl|NC_003279.8_cds_NP_001293287.1_631	0.387582	0.685202	0.400004
lcl|NC_003279.8_cds_NP_001293288.1_637	0.372437	0.641952	0.407693
lcl|NC_003279.8_cds_NP_001293289.1_605	0.351733	0.558221	0.382769
lcl|NC_003279.8_cds_NP_001293290.1_606	0.347024	0.553725	0.379284
lcl|NC_003279.8_cds_NP_001293291.1_617	0.296556	0.54594	0.345005
lcl|NC_003279.8_cds_NP_001293292.1_352	0.335643	0.560198	0.37807
lcl|NC_003279.8_cds_NP_001293293.1_640	0.263268	0.459223	0.295519
lcl|NC_003279.8_cds_NP_001293294.1_1062	0.372509	0.616453	0.413342
lcl|NC_003279.8_cds_NP_001293295.1_2793	0.374931	0.620295	0.417759
lcl|NC_003279.8_cds_NP_001293296.1_2260	0.36111	0.627068	0.397601
lcl|NC_003279.8_cds_NP_001293298.1_1263	0.32451	0.55622	0.36452
lcl|NC_003279.8_cds_NP_001293299.1_1267	0.324774	0.560706	0.364833
lcl|NC_003279.8_cds_NP_001293300.1_1269	0.329109	0.567505	0.368288
lcl|NC_003279.8_cds_NP_001293301.1_1268	0.325011	0.560765	0.364846
lcl|NC_003279.8_cds_NP_001293302.1_1264	0.324727	0.556268	0.364531
lcl|NC_003279.8_cds_NP_001293304.1_1265	0.323859	0.547334	0.363701
lcl|NC_003279.8_cds_NP_001293305.1_1266	0.324078	0.547372	0.363711
lcl|NC_003279.8_cds_NP_001293306.1_599	0.336263	0.581671	0.378808
lcl|NC_003279.8_cds_NP_001293307.1_652	0.357182	0.622094	0.387606
lcl|NC_003279.8_cds_NP_001293308.1_653	0.357802	0.622489	0.388173
lcl|NC_003279.8_cds_NP_001293309.1_654	0.357708	0.623006	0.38799
lcl|NC_003279.8_cds_NP_001293310.1_647	0.340317	0.596765	0.372007
lcl|NC_003279.8_cds_NP_001293311.1_648	0.340766	0.597089	0.372421
lcl|NC_003279.8_cds_NP_001293312.1_649	0.340626	0.597316	0.372227
lcl|NC_003279.8_cds_NP_001293313.1_581	0.514921	0.81679	0.510547
lcl|NC_003279.8_cds_NP_001293314.1_578	0.257506	0.438123	0.29468
lcl|NC_003279.8_cds_NP_001293315.1_579	0.259075	0.45457	0.292809
lcl|NC_003279.8_cds_NP_001293316.1_587	0.309996	0.568821	0.358407
lcl|NC_003279.8_cds_NP_001293317.1_588	0.327704	0.529009	0.377148
lcl|NC_003279.8_cds_NP_001293318.1_575	0.373388	0.646452	0.404012
lcl|NC_003279.8_cds_NP_001293319.1_576	0.374871	0.644025	0.405093
lcl|NC_003279.8_cds_NP_001293320.1_567	0.304607	0.503751	0.346708
lcl|NC_003279.8_cds_NP_001293321.1_568	0.304154	0.501707	0.346347
lcl|NC_003279.8_cds_NP_001293322.1_557	0.384595	0.673602	0.411225
lcl|NC_003279.8_cds_NP_001293323.1_572	0.341452	0.51359	0.377275
lcl|NC_003279.8_cds_NP_001293324.1_559	0.287556	0.501944	0.318978
lcl|NC_003279.8_cds_NP_001293325.1_1379	0.335225	0.529429	0.380182
lcl|NC_003279.8_cds_NP_001293326.1_526	0.3482	0.580692	0.396267
lcl|NC_003279.8_cds_NP_001293327.1_528	0.310887	0.530609	0.349409
lcl|NC_003279.8_cds_NP_001293328.1_527	0.311287	0.530498	0.349768
lcl|NC_003279.8_cds_NP_001293329.1_510	0.316453	0.535312	0.35823
lcl|NC_003279.8_cds_NP_001293330.1_514	0.313556	0.523277	0.355153
lcl|NC_003279.8_cds_NP_001293331.1_515	0.314846	0.526523	0.357276
lcl|NC_003279.8_cds_NP_001293332.1_516	0.311323	0.521013	0.35342
lcl|NC_003279.8_cds_NP_001293333.1_517	0.312493	0.524228	0.355503
lcl|NC_003279.8_cds_NP_001293334.1_518	0.309447	0.516882	0.351923
lcl|NC_003279.8_cds_NP_001293335.1_519	0.310547	0.519973	0.354041
lcl|NC_003279.8_cds_NP_001293336.1_521	0.31025	0.514406	0.351715
lcl|NC_003279.8_cds_NP_001293337.1_522	0.311513	0.517492	0.353979
lcl|NC_003279.8_cds_NP_001293338.1_477	0.361738	0.563025	0.388554
lcl|NC_003279.8_cds_NP_001293339.1_474	0.293837	0.516037	0.335192
lcl|NC_003279.8_cds_NP_001293340.1_484	0.312179	0.485544	0.344289
lcl|NC_003279.8_cds_NP_001293341.1_485	0.315211	0.481327	0.345527
lcl|NC_003279.8_cds_NP_001293342.1_494	0.362899	0.613474	0.3913
lcl|NC_003279.8_cds_NP_001293343.1_495	0.368772	0.627701	0.397185
lcl|NC_003279.8_cds_NP_001293344.1_496	0.371585	0.636645	0.399065
lcl|NC_003279.8_cds_NP_001293345.1_497	0.388015	0.69988	0.415951
lcl|NC_003279.8_cds_NP_001293346.1_498	0.265454	0.500773	0.295771
lcl|NC_003279.8_cds_NP_001293347.1_499	0.411661	0.748113	0.429721
lcl|NC_003279.8_cds_NP_001293348.1_491	0.353601	0.596279	0.385935
lcl|NC_003279.8_cds_NP_001293349.1_500	0.303271	0.53173	0.335095
lcl|NC_003279.8_cds_NP_001293350.1_501	0.307544	0.540101	0.346021
lcl|NC_003279.8_cds_NP_001293351.1_503	0.349321	0.609293	0.382764
lcl|NC_003279.8_cds_NP_001293352.1_449	0.32004	0.493998	0.353497
lcl|NC_003279.8_cds_NP_001293353.1_539	0.364885	0.678715	0.414315
lcl|NC_003279.8_cds_NP_001293354.1_445	0.346797	0.624536	0.37619
lcl|NC_003279.8_cds_NP_001293355.1_446	0.334366	0.606104	0.363675
lcl|NC_003279.8_cds_NP_001293356.1_441	0.341176	0.59792	0.384157
lcl|NC_003279.8_cds_NP_001293357.1_437	0.363052	0.589548	0.388341
lcl|NC_003279.8_cds_NP_001293358.1_535	0.296304	0.52433	0.343193
lcl|NC_003279.8_cds_NP_001293359.1_531	0.303802	0.54114	0.341134
lcl|NC_003279.8_cds_NP_001293360.1_532	0.302821	0.53958	0.339955
lcl|NC_003279.8_cds_NP_001293361.1_537	0.328803	0.554552	0.362356
lcl|NC_003279.8_cds_NP_001293362.1_554	0.332841	0.530059	0.366547
lcl|NC_003279.8_cds_NP_001293363.1_546	0.355178	0.559846	0.38408
lcl|NC_003279.8_cds_NP_001293364.1_550	0.340934	0.549553	0.370198
lcl|NC_003279.8_cds_NP_001293365.1_551	0.334647	0.543788	0.364784
lcl|NC_003279.8_cds_NP_001293366.1_676	0.269947	0.363488	0.291298
lcl|NC_003279.8_cds_NP_001293367.1_665	0.332213	0.550636	0.367675
lcl|NC_003279.8_cds_NP_001293368.1_668	0.323588	0.556611	0.35783
lcl|NC_003279.8_cds_NP_001293369.1_669	0.321966	0.549481	0.356166
lcl|NC_003279.8_cds_NP_001293370.1_671	0.343836	0.609151	0.376327
lcl|NC_003279.8_cds_NP_001293371.1_672	0.368646	0.675685	0.400488
lcl|NC_003279.8_cds_NP_001293372.1_678	0.363202	0.60866	0.38175
lcl|NC_003279.8_cds_NP_001293373.1_684	0.336612	0.521739	0.379273
lcl|NC_003279.8_cds_NP_001293374.1_685	0.341373	0.513415	0.385541
lcl|NC_003279.8_cds_NP_001293375.1_686	0.341355	0.513513	0.385263
lcl|NC_003279.8_cds_NP_001293376.1_687	0.348371	0.418434	0.39014
lcl|NC_003279.8_cds_NP_001293377.1_667	0.376632	0.568514	0.397532
lcl|NC_003279.8_cds_NP_001293378.1_3837	0.320261	0.566324	0.354115
lcl|NC_003279.8_cds_NP_001293379.1_3834	0.307304	0.554818	0.349801
lcl|NC_003279.8_cds_NP_001293380.1_710	0.29602	0.519889	0.337696
lcl|NC_003279.8_cds_NP_001293381.1_711	0.295267	0.522428	0.336641
lcl|NC_003279.8_cds_NP_001293382.1_701	0.336247	0.574644	0.378665
lcl|NC_003279.8_cds_NP_001293383.1_703	0.33586	0.573174	0.378441
lcl|NC_003279.8_cds_NP_001293384.1_704	0.33527	0.572525	0.37841
lcl|NC_003279.8_cds_NP_001293385.1_694	0.303842	0.524871	0.343284
lcl|NC_003279.8_cds_NP_001293386.1_1582	0.345211	0.606094	0.389825
lcl|NC_003279.8_cds_NP_001293387.1_1581	0.345258	0.606273	0.389915
lcl|NC_003279.8_cds_NP_001293388.1_1117	0.312492	0.524092	0.349817
lcl|NC_003279.8_cds_NP_001293389.1_1116	0.312488	0.523867	0.349813
lcl|NC_003279.8_cds_NP_001293390.1_656	0.299527	0.513973	0.343997
lcl|NC_003279.8_cds_NP_001293391.1_658	0.442977	0.715838	0.473949
lcl|NC_003279.8_cds_NP_001293392.1_471	0.347726	0.607071	0.387129
lcl|NC_003279.8_cds_NP_001293393.1_472	0.349915	0.601399	0.390724
lcl|NC_003279.8_cds_NP_001293394.1_469	0.312719	0.496075	0.357038
lcl|NC_003279.8_cds_NP_001293395.1_458	0.326709	0.53924	0.35821
lcl|NC_003279.8_cds_NP_001293396.1_459	0.3688	0.579838	0.395233
lcl|NC_003279.8_cds_NP_001293397.1_460	0.387677	0.586904	0.398166
lcl|NC_003279.8_cds_NP_001293398.1_462	0.315167	0.555898	0.352448
lcl|NC_003279.8_cds_NP_001293399.1_464	0.317892	0.555056	0.351996
lcl|NC_003279.8_cds_NP_001293400.1_465	0.31708	0.551267	0.349195
lcl|NC_003279.8_cds_NP_001293401.1_466	0.315914	0.516403	0.33433
lcl|NC_003279.8_cds_NP_001293402.1_461	0.283921	0.519041	0.336187
lcl|NC_003279.8_cds_NP_001293403.1_1534	0.310195	0.579555	0.345524
lcl|NC_003279.8_cds_NP_001293404.1_1522	0.400983	0.671317	0.426009
lcl|NC_003279.8_cds_NP_001293405.1_360	0.289109	0.512409	0.328518
lcl|NC_003279.8_cds_NP_001293406.1_361	0.280902	0.48785	0.319261
lcl|NC_003279.8_cds_NP_001293407.1_371	0.318685	0.515855	0.356488
lcl|NC_003279.8_cds_NP_001293408.1_367	0.313643	0.564796	0.364445
lcl|NC_003279.8_cds_NP_001293409.1_368	0.31467	0.577355	0.366481
lcl|NC_003279.8_cds_NP_001293410.1_369	0.325343	0.577936	0.38169
lcl|NC_003279.8_cds_NP_001293411.1_304	0.318093	0.506613	0.357221
lcl|NC_003279.8_cds_NP_001293412.1_306	0.328946	0.484617	0.352103
lcl|NC_003279.8_cds_NP_001293413.1_323	0.378458	0.572227	0.394993
lcl|NC_003279.8_cds_NP_001293414.1_316	0.315359	0.512823	0.352549
lcl|NC_003279.8_cds_NP_001293415.1_311	0.315398	0.536748	0.350453
lcl|NC_003279.8_cds_NP_001293416.1_312	0.315505	0.535645	0.349815
lcl|NC_003279.8_cds_NP_001293417.1_313	0.326497	0.557069	0.359142
lcl|NC_003279.8_cds_NP_001293418.1_320	0.277418	0.52433	0.336214
lcl|NC_003279.8_cds_NP_001293419.1_346	0.307629	0.521426	0.33445
lcl|NC_003279.8_cds_NP_001293420.1_354	0.333844	0.546218	0.372039
lcl|NC_003279.8_cds_NP_001293421.1_356	0.335512	0.548143	0.373977
lcl|NC_003279.8_cds_NP_001293422.1_357	0.339737	0.531307	0.379296
lcl|NC_003279.8_cds_NP_001293423.1_349	0.314823	0.526993	0.352174
lcl|NC_003279.8_cds_NP_001293424.1_350	0.31197	0.527216	0.350408
lcl|NC_003279.8_cds_NP_001293425.1_351	0.315334	0.52834	0.355202
lcl|NC_003279.8_cds_NP_001293426.1_348	0.325167	0.57433	0.363317
lcl|NC_003279.8_cds_NP_001293428.1_325	0.337763	0.565217	0.367311
lcl|NC_003279.8_cds_NP_001293429.1_345	0.288602	0.489477	0.328897
lcl|NC_003279.8_cds_NP_001293430.1_340	0.394057	0.668217	0.426641
lcl|NC_003279.8_cds_NP_001293431.1_341	0.395977	0.677526	0.428801
lcl|NC_003279.8_cds_NP_001293432.1_299	0.353668	0.612616	0.389459
lcl|NC_003279.8_cds_NP_001293433.1_300	0.355116	0.614041	0.388317
lcl|NC_003279.8_cds_NP_001293434.1_301	0.362236	0.617882	0.392157
lcl|NC_003279.8_cds_NP_001293435.1_302	0.353836	0.597207	0.381064
lcl|NC_003279.8_cds_NP_001293436.2_298	0.345797	0.567622	0.375352
lcl|NC_003279.8_cds_NP_001293437.1_418	0.36505	0.643101	0.405543
lcl|NC_003279.8_cds_NP_001293438.1_411	0.326809	0.556486	0.364691
lcl|NC_003279.8_cds_NP_001293439.1_404	0.374916	0.643174	0.39788
lcl|NC_003279.8_cds_NP_001293440.1_397	0.344913	0.58389	0.376346
lcl|NC_003279.8_cds_NP_001293441.1_393	0.397567	0.642702	0.445955
lcl|NC_003279.8_cds_NP_001293442.1_380	0.341795	0.611474	0.386538
lcl|NC_003279.8_cds_NP_001293443.1_376	0.319193	0.554151	0.363039
lcl|NC_003279.8_cds_NP_001293444.1_377	0.322893	0.567953	0.36476
lcl|NC_003279.8_cds_NP_001293445.1_407	0.327342	0.575593	0.360245
lcl|NC_003279.8_cds_NP_001293446.1_414	0.387618	0.706573	0.402935
lcl|NC_003279.8_cds_NP_001293447.1_416	0.328065	0.484532	0.376331
lcl|NC_003279.8_cds_NP_001293448.1_426	0.341723	0.573016	0.390085
lcl|NC_003279.8_cds_NP_001293449.1_427	0.33185	0.543672	0.385781
lcl|NC_003279.8_cds_NP_001293450.1_390	0.327026	0.515566	0.355921
lcl|NC_003279.8_cds_NP_001293451.1_391	0.3515	0.564115	0.376371
lcl|NC_003279.8_cds_NP_001293452.1_383	0.336081	0.598137	0.366714
lcl|NC_003279.8_cds_NP_001293453.1_1023	0.37854	0.647742	0.410223
lcl|NC_003279.8_cds_NP_001293454.1_1022	0.378578	0.648242	0.410302
lcl|NC_003279.8_cds_NP_001293455.1_1715	0.35381	0.497687	0.395549
lcl|NC_003279.8_cds_NP_001293456.1_1130	0.331336	0.542806	0.376508
lcl|NC_003279.8_cds_NP_001293457.1_339	0.357526	0.596159	0.397997
lcl|NC_003279.8_cds_NP_001293458.1_520	0.309722	0.511874	0.350056
lcl|NC_003279.8_cds_NP_001293459.1_3808	0.321297	0.530746	0.358279
lcl|NC_003279.8_cds_NP_001293460.1_1242	0.342392	0.598209	0.373363
lcl|NC_003279.8_cds_NP_001293461.1_3086	0.339658	0.5744	0.380429
lcl|NC_003279.8_cds_NP_001293462.1_3087	0.338706	0.557665	0.37657
lcl|NC_003279.8_cds_NP_001293463.1_3033	0.319398	0.588811	0.362174
lcl|NC_003279.8_cds_NP_001293464.1_3034	0.317517	0.589378	0.361797
lcl|NC_003279.8_cds_NP_001293465.1_3035	0.315409	0.601731	0.36199
lcl|NC_003279.8_cds_NP_001293466.1_2025	0.320402	0.594918	0.365829
lcl|NC_003279.8_cds_NP_001300389.1_1445	0.387476	0.61358	0.41082
lcl|NC_003279.8_cds_NP_001300390.1_2930	0.337356	0.598698	0.371119
lcl|NC_003279.8_cds_NP_001300391.1_2931	0.339188	0.607526	0.372925
lcl|NC_003279.8_cds_NP_001300392.1_3223	0.327585	0.549176	0.380584
lcl|NC_003279.8_cds_NP_001300393.1_3849	0.325632	0.543065	0.356083
lcl|NC_003279.8_cds_NP_001300394.1_2631	0.323868	0.595937	0.377581
lcl|NC_003279.8_cds_NP_001300395.1_2630	0.324851	0.598955	0.377941
lcl|NC_003279.8_cds_NP_001300396.1_3006	0.315938	0.565479	0.355593
lcl|NC_003279.8_cds_NP_001300397.1_3004	0.316266	0.570263	0.357994
lcl|NC_003279.8_cds_NP_001300398.1_2464	0.358496	0.604368	0.39442
lcl|NC_003279.8_cds_NP_001300399.1_2463	0.353827	0.596788	0.391641
lcl|NC_003279.8_cds_NP_001300400.1_2465	0.363956	0.60597	0.395871
lcl|NC_003279.8_cds_NP_001300401.1_3640	0.347477	0.541076	0.373286
lcl|NC_003279.8_cds_NP_001300402.1_3141	0.35385	0.623799	0.394653
lcl|NC_003279.8_cds_NP_001300403.1_3143	0.356512	0.632996	0.398128
lcl|NC_003279.8_cds_NP_001300404.1_4175	0.325978	0.567228	0.366163
lcl|NC_003279.8_cds_NP_001300405.1_4181	0.319437	0.558895	0.360498
lcl|NC_003279.8_cds_NP_001300406.1_3094	0.338771	0.597676	0.375092
lcl|NC_003279.8_cds_NP_001300407.1_3367	0.329415	0.534967	0.365395
lcl|NC_003279.8_cds_NP_001300408.1_3368	0.341838	0.550806	0.372884
lcl|NC_003279.8_cds_NP_001300409.1_3369	0.339384	0.55367	0.370648
lcl|NC_003279.8_cds_NP_001300410.1_1572	0.338615	0.614852	0.383393
lcl|NC_003279.8_cds_NP_001300411.1_1574	0.339455	0.615414	0.383681
lcl|NC_003279.8_cds_NP_001300412.1_1575	0.341499	0.619493	0.385358
lcl|NC_003279.8_cds_NP_001300413.1_1310	0.354677	0.597128	0.387162
lcl|NC_003279.8_cds_NP_001300414.1_1313	0.351843	0.597211	0.384544
lcl|NC_003279.8_cds_NP_001300415.1_1312	0.35496	0.597937	0.3875
lcl|NC_003279.8_cds_NP_001300416.1_1317	0.340883	0.576419	0.375985
lcl|NC_003279.8_cds_NP_001300417.1_1315	0.340552	0.575675	0.375639
lcl|NC_003279.8_cds_NP_001300418.1_1316	0.34213	0.574848	0.377372
lcl|NC_003279.8_cds_NP_001300419.1_1314	0.341777	0.574013	0.377003
lcl|NC_003279.8_cds_NP_001300420.1_2637	0.289639	0.54772	0.353668
lcl|NC_003279.8_cds_NP_001300421.1_1449	0.373902	0.569291	0.395737
lcl|NC_003279.8_cds_NP_001300422.1_1446	0.373902	0.569291	0.395737
lcl|NC_003279.8_cds_NP_001300423.1_1776	0.346564	0.594714	0.378174
lcl|NC_003279.8_cds_NP_001300424.1_1778	0.342033	0.601432	0.374803
lcl|NC_003279.8_cds_NP_001300425.1_2466	0.361524	0.597274	0.394867
lcl|NC_003279.8_cds_NP_001300426.1_2467	0.363581	0.610231	0.400696
lcl|NC_003279.8_cds_NP_001300427.1_1458	0.325729	0.583767	0.367618
lcl|NC_003279.8_cds_NP_001300428.1_1460	0.325493	0.582811	0.367479
lcl|NC_003279.8_cds_NP_001300429.1_1459	0.325634	0.582101	0.36752
lcl|NC_003279.8_cds_NP_001300430.1_1991	0.374357	0.641117	0.413223
lcl|NC_003279.8_cds_NP_001300431.1_1990	0.368297	0.645481	0.40787
lcl|NC_003279.8_cds_NP_001300432.1_1992	0.412355	0.655472	0.446932
lcl|NC_003279.8_cds_NP_001300433.1_3146	0.361654	0.643787	0.401103
lcl|NC_003279.8_cds_NP_001300434.1_3147	0.362543	0.642318	0.402095
lcl|NC_003279.8_cds_NP_001300435.1_1806	0.363988	0.638985	0.403997
lcl|NC_003279.8_cds_NP_001300436.1_1847	0.323167	0.575324	0.362467
lcl|NC_003279.8_cds_NP_001300437.1_2888	0.316687	0.578314	0.359934
lcl|NC_003279.8_cds_NP_001300438.1_2894	0.305751	0.541976	0.346851
lcl|NC_003279.8_cds_NP_001300439.1_2881	0.329438	0.590623	0.372414
lcl|NC_003279.8_cds_NP_001300440.1_889	0.378361	0.673839	0.409619
lcl|NC_003279.8_cds_NP_001300441.1_1948	0.318237	0.64639	0.374306
lcl|NC_003279.8_cds_NP_001300442.1_809	0.320486	0.521169	0.346069
lcl|NC_003279.8_cds_NP_001300443.1_808	0.319508	0.506859	0.346092
lcl|NC_003279.8_cds_NP_001300444.1_831	0.390503	0.674537	0.417822
lcl|NC_003279.8_cds_NP_001300445.1_827	0.34102	0.577575	0.381552
lcl|NC_003279.8_cds_NP_001300446.1_713	0.343301	0.607097	0.383095
lcl|NC_003279.8_cds_NP_001300447.1_714	0.342249	0.606351	0.378031
lcl|NC_003279.8_cds_NP_001300448.1_4177	0.332594	0.574234	0.369642
lcl|NC_003279.8_cds_NP_001300449.1_4179	0.334135	0.583763	0.368454
lcl|NC_003279.8_cds_NP_001300450.1_4180	0.334685	0.586369	0.368089
lcl|NC_003279.8_cds_NP_001300451.1_4178	0.333097	0.575658	0.370687
lcl|NC_003279.8_cds_NP_001300452.1_4176	0.32533	0.570532	0.366809
lcl|NC_003279.8_cds_NP_001300453.1_4190	0.495897	0.84032	0.488906
lcl|NC_003279.8_cds_NP_001300454.1_4189	0.457365	0.803482	0.461354
lcl|NC_003279.8_cds_NP_001300455.1_4191	0.521346	0.881289	0.507665
lcl|NC_003279.8_cds_NP_001300456.1_4192	0.521027	0.8846	0.507831
lcl|NC_003279.8_cds_NP_001300457.1_4184	0.514675	0.863041	0.508909
lcl|NC_003279.8_cds_NP_001300458.1_4186	0.472484	0.821676	0.477299
lcl|NC_003279.8_cds_NP_001300459.1_4188	0.508206	0.855878	0.502908
lcl|NC_003279.8_cds_NP_001300460.1_4185	0.483412	0.838696	0.482358
lcl|NC_003279.8_cds_NP_001300461.1_4187	0.51996	0.873607	0.508239
lcl|NC_003279.8_cds_NP_001300462.1_821	0.322152	0.581337	0.364944
lcl|NC_003279.8_cds_NP_001300463.1_822	0.340263	0.555046	0.369237
lcl|NC_003279.8_cds_NP_001300464.1_873	0.320724	0.546638	0.361001
lcl|NC_003279.8_cds_NP_001300465.1_875	0.320666	0.546786	0.360999
lcl|NC_003279.8_cds_NP_001300466.1_874	0.320716	0.546682	0.36099
lcl|NC_003279.8_cds_NP_001300467.1_876	0.320658	0.546829	0.360988
lcl|NC_003279.8_cds_NP_001300468.1_54	0.352414	0.609897	0.387593
lcl|NC_003279.8_cds_NP_001300469.1_796	0.370401	0.644761	0.399932
lcl|NC_003279.8_cds_NP_001300470.1_797	0.40055	0.662602	0.425095
lcl|NC_003279.8_cds_NP_001300471.1_735	0.352224	0.641944	0.400299
lcl|NC_003279.8_cds_NP_001300472.1_734	0.356565	0.628386	0.399502
lcl|NC_003279.8_cds_NP_001300473.1_733	0.343959	0.612462	0.391948
lcl|NC_003279.8_cds_NP_001300474.1_401	0.371963	0.629156	0.395444
lcl|NC_003279.8_cds_NP_001300475.1_402	0.364591	0.599348	0.391001
lcl|NC_003279.8_cds_NP_001300476.1_405	0.394399	0.606308	0.40721
lcl|NC_003279.8_cds_NP_001300477.1_1748	0.332331	0.591294	0.374918
lcl|NC_003279.8_cds_NP_001300478.1_1751	0.332673	0.59693	0.375268
lcl|NC_003279.8_cds_NP_001303778.1_1735	0.335279	0.595667	0.374404
lcl|NC_003279.8_cds_NP_001303779.1_1733	0.341734	0.605002	0.378793
lcl|NC_003279.8_cds_NP_001303780.1_1732	0.335722	0.597914	0.375225
lcl|NC_003279.8_cds_NP_001303781.1_1731	0.338273	0.609487	0.377007
lcl|NC_003279.8_cds_NP_001303782.1_1230	0.471301	0.706692	0.47513
lcl|NC_003279.8_cds_NP_001303783.1_1231	0.471432	0.728189	0.479898
lcl|NC_003279.8_cds_NP_001305199.1_1476	0.32664	0.594146	0.372446
lcl|NC_003279.8_cds_NP_001305200.1_1174	0.33311	0.610277	0.374429
lcl|NC_003279.8_cds_NP_001305201.1_4129	0.333359	0.521239	0.37864
lcl|NC_003279.8_cds_NP_001305202.1_1478	0.333479	0.602576	0.381241
lcl|NC_003279.8_cds_NP_001305203.1_1479	0.325126	0.5726	0.365649
lcl|NC_003279.8_cds_NP_001305204.1_1481	0.326014	0.561433	0.367557
lcl|NC_003279.8_cds_NP_001305205.1_2320	0.342031	0.631849	0.401869
lcl|NC_003279.8_cds_NP_001305206.1_2321	0.335424	0.604684	0.408502
lcl|NC_003279.8_cds_NP_001309450.1_1981	0.322481	0.578134	0.361836
lcl|NC_003279.8_cds_NP_001309456.1_4277	0.339839	0.555038	0.37665
lcl|NC_003279.8_cds_NP_001309477.1_1024	0.327822	0.587577	0.372936
lcl|NC_003279.8_cds_NP_001309486.1_1397	0.347641	0.620093	0.382813
lcl|NC_003279.8_cds_NP_001309491.1_1543	0.320068	0.574663	0.359673
lcl|NC_003279.8_cds_NP_001309516.1_4106	0.324378	0.583964	0.364618
lcl|NC_003279.8_cds_NP_001309517.1_4107	0.357694	0.649922	0.412107
lcl|NC_003279.8_cds_NP_001309518.1_1786	0.341336	0.596803	0.371216
lcl|NC_003279.8_cds_NP_001309519.1_4265	0.307872	0.557809	0.353503
lcl|NC_003279.8_cds_NP_001309520.1_1544	0.311287	0.496847	0.353415
lcl|NC_003279.8_cds_NP_001309521.1_1545	0.26365	0.449176	0.327081
lcl|NC_003279.8_cds_NP_001309522.1_1547	0.344141	0.685063	0.367701
lcl|NC_003279.8_cds_NP_001309523.1_1554	0.332701	0.609412	0.375484
lcl|NC_003279.8_cds_NP_001309524.1_1557	0.332838	0.614146	0.377223
lcl|NC_003279.8_cds_NP_001309525.1_1556	0.333254	0.612251	0.37695
lcl|NC_003279.8_cds_NP_001309526.1_1558	0.34678	0.637699	0.392059
lcl|NC_003279.8_cds_NP_001309527.1_1561	0.337469	0.632089	0.390577
lcl|NC_003279.8_cds_NP_001309528.1_1560	0.340512	0.630806	0.393896
lcl|NC_003279.8_cds_NP_001309529.1_1562	0.334649	0.626188	0.383998
lcl|NC_003279.8_cds_NP_001309530.1_1563	0.334734	0.636471	0.393699
lcl|NC_003279.8_cds_NP_001309531.1_4084	0.310078	0.477763	0.342354
lcl|NC_003279.8_cds_NP_001309533.1_4087	0.292116	0.403573	0.315094
lcl|NC_003279.8_cds_NP_001317729.1_3728	0.308906	0.554719	0.340001
lcl|NC_003279.8_cds_NP_001317755.1_3187	0.345635	0.629779	0.379001
lcl|NC_003279.8_cds_NP_001317756.1_3182	0.315597	0.58859	0.357294
lcl|NC_003279.8_cds_NP_001317768.1_4085	0.308874	0.472102	0.341004
lcl|NC_003279.8_cds_NP_001317769.1_4086	0.297019	0.424801	0.321112
lcl|NC_003279.8_cds_NP_001317773.1_1111	0.380226	0.690992	0.408137
lcl|NC_003279.8_cds_NP_001317774.1_3184	0.343534	0.608099	0.381193
lcl|NC_003279.8_cds_NP_001317862.1_1228	0.308707	0.54352	0.35215
lcl|NC_003279.8_cds_NP_001317863.1_2085	0.338061	0.608083	0.380731
lcl|NC_003279.8_cds_NP_001317864.1_2078	0.33327	0.596085	0.37722
lcl|NC_003279.8_cds_NP_001317865.1_2082	0.332851	0.594829	0.376807
lcl|NC_003279.8_cds_NP_001317866.1_2083	0.33309	0.595463	0.377074
lcl|NC_003279.8_cds_NP_001317867.1_2087	0.334976	0.587861	0.374307
lcl|NC_003279.8_cds_NP_001333545.1_2059	0.325903	0.556529	0.363004
lcl|NC_003279.8_cds_NP_001333546.1_2060	0.328163	0.560848	0.363311
lcl|NC_003279.8_cds_NP_001333547.1_3533	0.29928	0.48299	0.343075
lcl|NC_003279.8_cds_NP_001333548.1_3534	0.302697	0.484798	0.348313
lcl|NC_003279.8_cds_NP_001334193.1_3843	0.310001	0.563044	0.34523
lcl|NC_003279.8_cds_NP_001334202.1_2269	0.319413	0.578138	0.360812
lcl|NC_003279.8_cds_NP_001335509.1_2054	0.326864	0.604676	0.374704
lcl|NC_003279.8_cds_NP_001335517.1_1838	0.318577	0.585046	0.359216
lcl|NC_003279.8_cds_NP_001335518.1_1839	0.319116	0.592835	0.359865
lcl|NC_003279.8_cds_NP_001335519.1_3415	0.378306	0.641674	0.407136
lcl|NC_003279.8_cds_NP_001335520.1_3414	0.37933	0.642992	0.408016
lcl|NC_003279.8_cds_NP_001335521.1_3420	0.375627	0.636303	0.405145
lcl|NC_003279.8_cds_NP_001335522.1_3419	0.376556	0.637453	0.405952
lcl|NC_003279.8_cds_NP_001335523.1_3421	0.37551	0.634007	0.406126
lcl|NC_003279.8_cds_NP_001335524.1_3422	0.377814	0.63808	0.408356
lcl|NC_003279.8_cds_NP_001335525.1_2651	0.327602	0.571254	0.374834
lcl|NC_003279.8_cds_NP_001335526.1_2650	0.330089	0.575424	0.377119
lcl|NC_003279.8_cds_NP_001335527.1_2770	0.331761	0.60017	0.375541
lcl|NC_003279.8_cds_NP_001335528.1_2771	0.333909	0.606288	0.377488
lcl|NC_003279.8_cds_NP_001335529.1_2772	0.331194	0.603	0.374345
lcl|NC_003279.8_cds_NP_001335530.1_1094	0.341159	0.602063	0.380936
lcl|NC_003279.8_cds_NP_001335531.1_1841	0.318955	0.591731	0.359864
lcl|NC_003279.8_cds_NP_001337275.1_1821	0.306243	0.553098	0.354192
lcl|NC_003279.8_cds_NP_001337280.1_2240	0.330386	0.578431	0.371226
lcl|NC_003279.8_cds_NP_001337281.1_2242	0.329335	0.577486	0.370448
lcl|NC_003279.8_cds_NP_001337282.1_2243	0.331015	0.579584	0.371783
lcl|NC_003279.8_cds_NP_001337283.1_3392	0.368662	0.692311	0.38611
lcl|NC_003279.8_cds_NP_001337284.1_2241	0.330097	0.574827	0.370662
lcl|NC_003279.8_cds_NP_001337285.1_2238	0.347068	0.620817	0.393902
lcl|NC_003279.8_cds_NP_001337286.1_839	0.323896	0.52409	0.366322
lcl|NC_003279.8_cds_NP_001337287.1_2095	0.302403	0.555735	0.342751
lcl|NC_003279.8_cds_NP_001337288.1_2097	0.342048	0.634481	0.365751
lcl|NC_003279.8_cds_NP_001337289.1_4196	0.488387	0.823997	0.484584
lcl|NC_003279.8_cds_NP_001338806.1_2664	0.332631	0.555806	0.370548
lcl|NC_003279.8_cds_NP_001338807.1_1801	0.357979	0.628504	0.388617
lcl|NC_003279.8_cds_NP_001343605.1_1190	0.33958	0.555181	0.405596
lcl|NC_003279.8_cds_NP_001343617.1_1016	0.417427	0.698412	0.444203
lcl|NC_003279.8_cds_NP_001343631.1_1299	0.321853	0.520833	0.358441
lcl|NC_003279.8_cds_NP_001343707.1_1098	0.415836	0.713385	0.433739
lcl|NC_003279.8_cds_NP_001343708.1_1189	0.341418	0.556791	0.406697
lcl|NC_003279.8_cds_NP_001343709.1_1191	0.341678	0.556123	0.407097
lcl|NC_003279.8_cds_NP_001343710.1_1194	0.345771	0.563735	0.411941
lcl|NC_003279.8_cds_NP_001343711.1_1018	0.416957	0.69734	0.444194
lcl|NC_003279.8_cds_NP_001343712.1_1019	0.417652	0.698512	0.444371
lcl|NC_003279.8_cds_NP_001343713.1_1020	0.415648	0.70549	0.443027
lcl|NC_003279.8_cds_NP_001343714.1_1010	0.413705	0.692978	0.440773
lcl|NC_003279.8_cds_NP_001343715.1_1014	0.422585	0.704168	0.448534
lcl|NC_003279.8_cds_NP_001343716.1_1009	0.412771	0.691487	0.440346
lcl|NC_003279.8_cds_NP_001343717.1_1008	0.412771	0.690339	0.439312
lcl|NC_003279.8_cds_NP_001343718.1_1013	0.422457	0.702165	0.447604
lcl|NC_003279.8_cds_NP_001343719.1_1017	0.417047	0.696234	0.443161
lcl|NC_003279.8_cds_NP_001343720.1_3165	0.314031	0.593476	0.372261
lcl|NC_003279.8_cds_NP_001343721.1_769	0.313841	0.536116	0.344532
lcl|NC_003279.8_cds_NP_001343722.1_242	0.32314	0.551835	0.361955
lcl|NC_003279.8_cds_NP_001343723.1_243	0.337913	0.649565	0.37248
lcl|NC_003279.8_cds_NP_001343724.1_3388	0.354521	0.691948	0.383544
lcl|NC_003279.8_cds_NP_001343725.1_938	0.411919	0.657137	0.43633
lcl|NC_003279.8_cds_NP_001343726.1_940	0.424149	0.67859	0.448922
lcl|NC_003279.8_cds_NP_001343727.1_941	0.442141	0.64922	0.472617
lcl|NC_003279.8_cds_NP_001343728.1_40	0.34809	0.649142	0.381139
lcl|NC_003279.8_cds_NP_001343729.1_268	0.345544	0.615134	0.369299
lcl|NC_003279.8_cds_NP_001343730.1_1132	0.377883	0.622023	0.398665
lcl|NC_003279.8_cds_NP_001343731.1_813	0.363473	0.525512	0.389115
lcl|NC_003279.8_cds_NP_001343732.1_513	0.311915	0.51554	0.353056
lcl|NC_003279.8_cds_NP_001343733.1_307	0.257742	0.354343	0.338383
lcl|NC_003279.8_cds_NP_001343734.1_792	0.35029	0.602141	0.383254
lcl|NC_003279.8_cds_NP_001343735.1_1100	0.424767	0.726249	0.44088
lcl|NC_003279.8_cds_NP_001348646.1_62	0.300386	0.51659	0.34412
lcl|NC_003279.8_cds_NP_001348651.1_744	0.271568	0.547646	0.340199
lcl|NC_003279.8_cds_NP_001348659.1_1185	0.260018	0.528964	0.296845
lcl|NC_003279.8_cds_NP_001348660.1_1183	0.309453	0.55725	0.344796
lcl|NC_003279.8_cds_NP_001348661.1_2811	0.371566	0.631589	0.409292
lcl|NC_003279.8_cds_NP_001348662.1_2953	0.334273	0.558291	0.371027
lcl|NC_003279.8_cds_NP_001348663.1_2955	0.336014	0.563277	0.375621
lcl|NC_003279.8_cds_NP_001348664.1_2954	0.336873	0.562938	0.37632
lcl|NC_003279.8_cds_NP_001348665.1_920	0.28493	0.424944	0.337316
lcl|NC_003279.8_cds_NP_001348666.1_2248	0.347025	0.632764	0.383616
lcl|NC_003279.8_cds_NP_001348667.1_2250	0.346509	0.633336	0.38293
lcl|NC_003279.8_cds_NP_001348668.1_1783	0.312794	0.571406	0.355985
lcl|NC_003279.8_cds_NP_001348669.1_1149	0.307459	0.565274	0.351137
lcl|NC_003279.8_cds_NP_001348670.1_1150	0.307803	0.565156	0.351216
lcl|NC_003279.8_cds_NP_001348671.1_1151	0.303439	0.559144	0.352536
lcl|NC_003279.8_cds_NP_001348672.1_2042	0.308813	0.515391	0.344891
lcl|NC_003279.8_cds_NP_001348673.2_2165	0.290215	0.548643	0.348748
lcl|NC_003279.8_cds_NP_001348674.1_1565	0.290025	0.447448	0.348194
lcl|NC_003279.8_cds_NP_001348675.1_3000	0.364391	0.657769	0.39024
lcl|NC_003279.8_cds_NP_001348676.1_3001	0.332244	0.559913	0.390007
lcl|NC_003279.8_cds_NP_001348677.1_4064	0.352108	0.399896	0.339507
lcl|NC_003279.8_cds_NP_001348678.2_945	0.391672	0.797593	0.388146
lcl|NC_003279.8_cds_NP_001348679.2_944	0.363906	0.54225	0.382474
lcl|NC_003279.8_cds_NP_001348680.2_947	0.330929	0.564762	0.321626
lcl|NC_003279.8_cds_NP_001348681.1_946	0.384067	0.667833	0.39844
lcl|NC_003279.8_cds_NP_001348682.1_434	0.287484	0.541406	0.324655
lcl|NC_003279.8_cds_NP_001348683.2_2593	0.309339	0.448709	0.331635
lcl|NC_003279.8_cds_NP_001348684.2_2880	0.293508	0.387552	0.310442
lcl|NC_003279.8_cds_NP_001348685.2_1854	0.324126	0.460551	0.332208
lcl|NC_003279.8_cds_NP_001348686.1_1853	0.298456	0.519361	0.332273
lcl|NC_003279.8_cds_NP_001348688.1_817	0.452498	0.735808	0.434332
lcl|NC_003279.8_cds_NP_001348689.1_1096	0.34814	0.584067	0.367291
lcl|NC_003279.8_cds_NP_001348690.1_447	0.270792	0.58633	0.323517
lcl|NC_003279.8_cds_NP_001348691.1_326	0.246925	0.488114	0.280441
lcl|NC_003279.8_cds_NP_001348692.1_3205	0.292575	0.471804	0.330881
lcl|NC_003279.8_cds_NP_001348693.1_1754	0.301598	0.673333	0.335301
lcl|NC_003279.8_cds_NP_001348694.2_1755	0.286667	0.594369	0.308024
lcl|NC_003279.8_cds_NP_001350967.1_2976	0.319521	0.586067	0.356153
lcl|NC_003279.8_cds_NP_001350972.1_80	0.359545	0.587575	0.387592
lcl|NC_003279.8_cds_NP_001350973.1_199	0.344082	0.537205	0.369837
lcl|NC_003279.8_cds_NP_001350974.1_177	0.316914	0.528228	0.34682
lcl|NC_003279.8_cds_NP_001350977.1_4008	0.269949	0.441353	0.300432
lcl|NC_003279.8_cds_NP_001350982.1_4283	0.34839	0.573871	0.38282
lcl|NC_003279.8_cds_NP_001355369.1_4027	0.296313	0.519054	0.345923
lcl|NC_003279.8_cds_NP_001355382.1_1904	0.35164	0.605162	0.389934
lcl|NC_003279.8_cds_NP_001355385.1_1822	0.31777	0.56299	0.356538
lcl|NC_003279.8_cds_NP_001355495.1_904	0.315626	0.545366	0.359033
lcl|NC_003279.8_cds_NP_001355496.1_3199	0.402249	0.67569	0.421279
lcl|NC_003279.8_cds_NP_001355497.1_175	0.334931	0.529549	0.373482
lcl|NC_003279.8_cds_NP_001355498.1_4072	0.305918	0.546149	0.348057
lcl|NC_003279.8_cds_NP_490660.1_1	0.334169	0.550627	0.372673
lcl|NC_003279.8_cds_NP_490661.1_2	0.373906	0.61215	0.400863
lcl|NC_003279.8_cds_NP_490662.1_5	0.349242	0.597942	0.384779
lcl|NC_003279.8_cds_NP_490663.1_4	0.349277	0.597669	0.384646
lcl|NC_003279.8_cds_NP_490664.2_9	0.325126	0.585888	0.369889
lcl|NC_003279.8_cds_NP_490665.2_10	0.330998	0.598493	0.374402
lcl|NC_003279.8_cds_NP_490666.2_12	0.304103	0.524943	0.344612
lcl|NC_003279.8_cds_NP_490668.4_14	0.326049	0.573185	0.364084
lcl|NC_003279.8_cds_NP_490670.1_19	0.324216	0.544382	0.359861
lcl|NC_003279.8_cds_NP_490671.2_22	0.359861	0.518637	0.389637
lcl|NC_003279.8_cds_NP_490672.2_23	0.323795	0.498183	0.357422
lcl|NC_003279.8_cds_NP_490675.1_27	0.400913	0.658034	0.422742
lcl|NC_003279.8_cds_NP_490676.1_28	0.513185	0.855431	0.506533
lcl|NC_003279.8_cds_NP_490678.3_31	0.356895	0.499675	0.403356
lcl|NC_003279.8_cds_NP_490679.1_32	0.409888	0.549514	0.449254
lcl|NC_003279.8_cds_NP_490680.1_34	0.35375	0.568254	0.387842
lcl|NC_003279.8_cds_NP_490681.2_35	0.374605	0.600048	0.400601
lcl|NC_003279.8_cds_NP_490683.4_38	0.313293	0.490384	0.345205
lcl|NC_003279.8_cds_NP_490684.1_39	0.322744	0.583459	0.365908
lcl|NC_003279.8_cds_NP_490686.3_41	0.328188	0.591491	0.370124
lcl|NC_003279.8_cds_NP_490687.1_42	0.338448	0.572643	0.371636
lcl|NC_003279.8_cds_NP_490688.1_45	0.346818	0.562501	0.390357
lcl|NC_003279.8_cds_NP_490689.2_47	0.342785	0.587218	0.361713
lcl|NC_003279.8_cds_NP_490690.1_48	0.334447	0.511655	0.368557
lcl|NC_003279.8_cds_NP_490695.2_53	0.341908	0.542729	0.36453
lcl|NC_003279.8_cds_NP_490703.1_57	0.305647	0.445183	0.32114
lcl|NC_003279.8_cds_NP_490706.2_60	0.352529	0.559887	0.380171
lcl|NC_003279.8_cds_NP_490708.3_61	0.361184	0.581447	0.382939
lcl|NC_003279.8_cds_NP_490709.1_63	0.353744	0.554883	0.409289
lcl|NC_003279.8_cds_NP_490711.2_67	0.302248	0.516937	0.344859
lcl|NC_003279.8_cds_NP_490712.1_70	0.294779	0.495036	0.334881
lcl|NC_003279.8_cds_NP_490713.1_71	0.290823	0.487229	0.329445
lcl|NC_003279.8_cds_NP_490714.1_74	0.32654	0.50185	0.359711
lcl|NC_003279.8_cds_NP_490715.1_76	0.448256	0.776882	0.457559
lcl|NC_003279.8_cds_NP_490716.1_78	0.347823	0.562081	0.372958
lcl|NC_003279.8_cds_NP_490719.1_81	0.327766	0.553823	0.362694
lcl|NC_003279.8_cds_NP_490721.1_84	0.356649	0.535165	0.370897
lcl|NC_003279.8_cds_NP_490722.3_85	0.327229	0.544887	0.366275
lcl|NC_003279.8_cds_NP_490724.1_87	0.36224	0.58906	0.398341
lcl|NC_003279.8_cds_NP_490725.3_89	0.323251	0.540315	0.361043
lcl|NC_003279.8_cds_NP_490726.1_90	0.35393	0.568468	0.385372
lcl|NC_003279.8_cds_NP_490727.1_91	0.365015	0.585183	0.404039
lcl|NC_003279.8_cds_NP_490728.2_92	0.312732	0.44066	0.34569
lcl|NC_003279.8_cds_NP_490730.2_95	0.305041	0.546762	0.35029
lcl|NC_003279.8_cds_NP_490731.3_97	0.311552	0.5354	0.343251
lcl|NC_003279.8_cds_NP_490732.2_98	0.307874	0.538007	0.347751
lcl|NC_003279.8_cds_NP_490734.1_100	0.413322	0.592854	0.433484
lcl|NC_003279.8_cds_NP_490735.3_101	0.311341	0.517255	0.346862
lcl|NC_003279.8_cds_NP_490736.2_102	0.316329	0.518731	0.361059
lcl|NC_003279.8_cds_NP_490737.2_104	0.310401	0.548924	0.354263
lcl|NC_003279.8_cds_NP_490738.1_105	0.392132	0.626537	0.407114
lcl|NC_003279.8_cds_NP_490740.3_108	0.318589	0.54835	0.349535
lcl|NC_003279.8_cds_NP_490741.1_110	0.315285	0.517432	0.340608
lcl|NC_003279.8_cds_NP_490742.1_111	0.370209	0.620626	0.401483
lcl|NC_003279.8_cds_NP_490743.2_113	0.309101	0.522867	0.349189
lcl|NC_003279.8_cds_NP_490744.1_116	0.384394	0.622379	0.410059
lcl|NC_003279.8_cds_NP_490748.1_122	0.352915	0.576168	0.382845
lcl|NC_003279.8_cds_NP_490749.1_124	0.514334	0.832674	0.505664
lcl|NC_003279.8_cds_NP_490751.1_131	0.342935	0.56515	0.371457
lcl|NC_003279.8_cds_NP_490752.2_133	0.323537	0.586786	0.367241
lcl|NC_003279.8_cds_NP_490753.1_138	0.403052	0.687492	0.419543
lcl|NC_003279.8_cds_NP_490754.1_140	0.503524	0.780929	0.504696
lcl|NC_003279.8_cds_NP_490757.3_147	0.330718	0.529287	0.362169
lcl|NC_003279.8_cds_NP_490758.1_151	0.398579	0.671387	0.427506
lcl|NC_003279.8_cds_NP_490759.1_153	0.314282	0.531926	0.360403
lcl|NC_003279.8_cds_NP_490761.2_154	0.399165	0.617238	0.41394
lcl|NC_003279.8_cds_NP_490762.1_156	0.354535	0.544154	0.379197
lcl|NC_003279.8_cds_NP_490763.1_159	0.322359	0.559845	0.368167
lcl|NC_003279.8_cds_NP_490764.1_160	0.326811	0.554248	0.375072
lcl|NC_003279.8_cds_NP_490765.1_162	0.354124	0.560456	0.402921
lcl|NC_003279.8_cds_NP_490766.2_163	0.329274	0.520514	0.355551
lcl|NC_003279.8_cds_NP_490768.3_171	0.330159	0.57765	0.36748
lcl|NC_003279.8_cds_NP_490769.2_172	0.367557	0.585146	0.393158
lcl|NC_003279.8_cds_NP_490770.1_173	0.327135	0.503222	0.363451
lcl|NC_003279.8_cds_NP_490771.2_174	0.347712	0.556111	0.381152
lcl|NC_003279.8_cds_NP_490773.3_181	0.332046	0.498972	0.354468
lcl|NC_003279.8_cds_NP_490774.2_183	0.336647	0.535943	0.363314
lcl|NC_003279.8_cds_NP_490776.2_192	0.338144	0.593203	0.369676
lcl|NC_003279.8_cds_NP_490777.2_193	0.339435	0.648516	0.388504
lcl|NC_003279.8_cds_NP_490778.1_195	0.376431	0.549533	0.391402
lcl|NC_003279.8_cds_NP_490782.1_206	0.359068	0.602703	0.398294
lcl|NC_003279.8_cds_NP_490783.3_207	0.325297	0.527448	0.359608
lcl|NC_003279.8_cds_NP_490785.3_210	0.330217	0.513384	0.368683
lcl|NC_003279.8_cds_NP_490787.1_211	0.309599	0.492881	0.340759
lcl|NC_003279.8_cds_NP_490788.1_216	0.322815	0.535404	0.363835
lcl|NC_003279.8_cds_NP_490789.3_219	0.327974	0.56677	0.365239
lcl|NC_003279.8_cds_NP_490790.1_221	0.366234	0.598107	0.387594
lcl|NC_003279.8_cds_NP_490791.3_224	0.322054	0.551757	0.365126
lcl|NC_003279.8_cds_NP_490794.1_231	0.378965	0.562834	0.416274
lcl|NC_003279.8_cds_NP_490795.4_232	0.357629	0.555934	0.396341
lcl|NC_003279.8_cds_NP_490796.2_233	0.326177	0.554566	0.355928
lcl|NC_003279.8_cds_NP_490798.1_235	0.322229	0.54016	0.35141
lcl|NC_003279.8_cds_NP_490799.2_237	0.317647	0.513022	0.350877
lcl|NC_003279.8_cds_NP_490800.2_238	0.309065	0.504843	0.344737
lcl|NC_003279.8_cds_NP_490803.1_239	0.344119	0.559232	0.369795
lcl|NC_003279.8_cds_NP_490804.3_240	0.301521	0.494619	0.343839
lcl|NC_003279.8_cds_NP_490805.5_241	0.308642	0.540486	0.348161
lcl|NC_003279.8_cds_NP_490806.1_245	0.334669	0.579344	0.375841
lcl|NC_003279.8_cds_NP_490807.1_244	0.335027	0.578496	0.377072
lcl|NC_003279.8_cds_NP_490808.1_249	0.360255	0.592794	0.397377
lcl|NC_003279.8_cds_NP_490809.2_250	0.345637	0.533343	0.371823
lcl|NC_003279.8_cds_NP_490811.3_257	0.327405	0.524155	0.369672
lcl|NC_003279.8_cds_NP_490812.1_260	0.421795	0.638226	0.428122
lcl|NC_003279.8_cds_NP_490815.2_265	0.3397	0.555551	0.350065
lcl|NC_003279.8_cds_NP_490816.4_264	0.36764	0.577784	0.396046
lcl|NC_003279.8_cds_NP_490817.4_266	0.375047	0.596608	0.395006
lcl|NC_003279.8_cds_NP_490819.3_269	0.33976	0.597244	0.362812
lcl|NC_003279.8_cds_NP_490820.1_272	0.309896	0.501821	0.344853
lcl|NC_003279.8_cds_NP_490823.1_276	0.331052	0.544908	0.363287
lcl|NC_003279.8_cds_NP_490827.2_285	0.323699	0.527708	0.352504
lcl|NC_003279.8_cds_NP_490828.3_286	0.324217	0.526706	0.355047
lcl|NC_003279.8_cds_NP_490829.1_289	0.336768	0.574603	0.37485
lcl|NC_003279.8_cds_NP_490830.3_290	0.372867	0.628903	0.411279
lcl|NC_003279.8_cds_NP_490834.1_294	0.348786	0.587032	0.387412
lcl|NC_003279.8_cds_NP_490835.1_296	0.531021	0.821563	0.551861
lcl|NC_003279.8_cds_NP_490836.1_297	0.350535	0.58126	0.3786
lcl|NC_003279.8_cds_NP_490837.2_305	0.322241	0.505506	0.360364
lcl|NC_003279.8_cds_NP_490838.3_308	0.32481	0.528112	0.357553
lcl|NC_003279.8_cds_NP_490839.1_309	0.352795	0.568929	0.396931
lcl|NC_003279.8_cds_NP_490840.2_310	0.317875	0.543071	0.351964
lcl|NC_003279.8_cds_NP_490842.1_321	0.462247	0.719859	0.471802
lcl|NC_003279.8_cds_NP_490843.1_322	0.381886	0.587523	0.402062
lcl|NC_003279.8_cds_NP_490846.4_328	0.307222	0.518389	0.34856
lcl|NC_003279.8_cds_NP_490847.2_329	0.294087	0.489358	0.349423
lcl|NC_003279.8_cds_NP_490848.2_330	0.316746	0.523139	0.356278
lcl|NC_003279.8_cds_NP_490849.4_331	0.335723	0.537116	0.375019
[truncated: 28,165 more rows]

## Sheet: Drosophila melanogaster
Table S5: The gtAI, stAI, and CAI values for the two eukaryotic (non-fungal) organisms used in the study.
gene id	gtAI	CAI	StAI
lcl|NC_004353.4_cds_NP_001014685.1_30236	0.408388	0.310035	0.36387
lcl|NC_004353.4_cds_NP_001014687.3_30324	0.4159	0.296152	0.372904
lcl|NC_004353.4_cds_NP_001014688.3_30315	0.41693	0.301876	0.375076
lcl|NC_004353.4_cds_NP_001014689.3_30322	0.417218	0.303026	0.37722
lcl|NC_004353.4_cds_NP_001014691.2_30386	0.42054	0.33642	0.375797
lcl|NC_004353.4_cds_NP_001014693.1_30401	0.414677	0.351767	0.356608
lcl|NC_004353.4_cds_NP_001014694.1_30403	0.412826	0.352981	0.352918
lcl|NC_004353.4_cds_NP_001014695.1_30412	0.402714	0.330605	0.346951
lcl|NC_004353.4_cds_NP_001014696.1_30463	0.397021	0.297205	0.363801
lcl|NC_004353.4_cds_NP_001014697.1_30479	0.378809	0.306751	0.334066
lcl|NC_004353.4_cds_NP_001014698.1_30482	0.382853	0.314256	0.332572
lcl|NC_004353.4_cds_NP_001014699.1_30481	0.379546	0.308278	0.332542
lcl|NC_004353.4_cds_NP_001014701.1_30478	0.381796	0.311699	0.33472
lcl|NC_004353.4_cds_NP_001014702.1_30501	0.406795	0.278633	0.37139
lcl|NC_004353.4_cds_NP_001014703.1_30499	0.406068	0.275622	0.371231
lcl|NC_004353.4_cds_NP_001014705.1_30502	0.406795	0.278633	0.37139
lcl|NC_004353.4_cds_NP_001027029.2_30513	0.40495	0.278361	0.363685
lcl|NC_004353.4_cds_NP_001027030.1_30515	0.403505	0.27746	0.361052
lcl|NC_004353.4_cds_NP_001027031.1_30516	0.404745	0.279725	0.363831
lcl|NC_004353.4_cds_NP_001033798.1_30238	0.411651	0.300841	0.364311
lcl|NC_004353.4_cds_NP_001033801.3_30260	0.393736	0.272467	0.356951
lcl|NC_004353.4_cds_NP_001033802.2_30297	0.381513	0.256446	0.333433
lcl|NC_004353.4_cds_NP_001033803.3_30321	0.417218	0.303026	0.37722
lcl|NC_004353.4_cds_NP_001033805.1_30503	0.417899	0.309182	0.381603
lcl|NC_004353.4_cds_NP_001033806.1_30504	0.417899	0.309182	0.381603
lcl|NC_004353.4_cds_NP_001033807.1_30505	0.396573	0.284503	0.350978
lcl|NC_004353.4_cds_NP_001033808.1_30506	0.396573	0.284503	0.350978
lcl|NC_004353.4_cds_NP_001033810.1_30509	0.394518	0.285317	0.348837
lcl|NC_004353.4_cds_NP_001033812.1_30510	0.394518	0.285317	0.348837
lcl|NC_004353.4_cds_NP_001033814.1_30511	0.394518	0.285317	0.348837
lcl|NC_004353.4_cds_NP_001036250.1_30383	0.404637	0.292497	0.337753
lcl|NC_004353.4_cds_NP_001036251.2_30382	0.404229	0.292078	0.337372
lcl|NC_004353.4_cds_NP_001096849.1_30244	0.390209	0.277794	0.35178
lcl|NC_004353.4_cds_NP_001096850.2_30292	0.392827	0.267262	0.338178
lcl|NC_004353.4_cds_NP_001096851.2_30293	0.390555	0.262098	0.331906
lcl|NC_004353.4_cds_NP_001096852.1_30430	0.399981	0.294575	0.351042
lcl|NC_004353.4_cds_NP_001104092.2_30222	0.394444	0.262145	0.356188
lcl|NC_004353.4_cds_NP_001137855.2_30310	0.379375	0.28572	0.326128
lcl|NC_004353.4_cds_NP_001137857.1_30429	0.402568	0.292902	0.350792
lcl|NC_004353.4_cds_NP_001162819.1_30240	0.403231	0.297282	0.358307
lcl|NC_004353.4_cds_NP_001162821.1_30284	0.397956	0.28582	0.364158
lcl|NC_004353.4_cds_NP_001162822.1_30285	0.397956	0.28582	0.364158
lcl|NC_004353.4_cds_NP_001162823.1_30289	0.392884	0.284352	0.358948
lcl|NC_004353.4_cds_NP_001162824.1_30378	0.398639	0.285408	0.35281
lcl|NC_004353.4_cds_NP_001162825.1_30405	0.435838	0.330899	0.392521
lcl|NC_004353.4_cds_NP_001162827.1_30419	0.410398	0.310603	0.353678
lcl|NC_004353.4_cds_NP_001162828.1_30420	0.410398	0.310603	0.353678
lcl|NC_004353.4_cds_NP_001162829.1_30439	0.409141	0.315661	0.374579
lcl|NC_004353.4_cds_NP_001162830.1_30441	0.409763	0.317678	0.375479
lcl|NC_004353.4_cds_NP_001162831.1_30456	0.396255	0.297345	0.361724
lcl|NC_004353.4_cds_NP_001162832.1_30464	0.39487	0.29603	0.361579
lcl|NC_004353.4_cds_NP_001162833.1_30466	0.394324	0.295411	0.361011
lcl|NC_004353.4_cds_NP_001162834.1_30483	0.387884	0.312908	0.343981
lcl|NC_004353.4_cds_NP_001162835.1_30494	0.387578	0.265972	0.34113
lcl|NC_004353.4_cds_NP_001188514.1_30318	0.417406	0.302673	0.376047
lcl|NC_004353.4_cds_NP_001188515.1_30314	0.41687	0.302288	0.375331
lcl|NC_004353.4_cds_NP_001188516.1_30319	0.416436	0.30131	0.374657
lcl|NC_004353.4_cds_NP_001188517.1_30320	0.416919	0.302114	0.375632
lcl|NC_004353.4_cds_NP_001188518.1_30323	0.417218	0.303026	0.37722
lcl|NC_004353.4_cds_NP_001245400.1_30224	0.393538	0.284316	0.355759
lcl|NC_004353.4_cds_NP_001245401.1_30227	0.391987	0.301105	0.35523
lcl|NC_004353.4_cds_NP_001245402.1_30226	0.388392	0.286507	0.335747
lcl|NC_004353.4_cds_NP_001245404.1_30229	0.466682	0.382833	0.435929
lcl|NC_004353.4_cds_NP_001245405.1_30237	0.400558	0.301779	0.35283
lcl|NC_004353.4_cds_NP_001245406.1_30234	0.405276	0.305079	0.367646
lcl|NC_004353.4_cds_NP_001245407.1_30259	0.393736	0.272467	0.356951
lcl|NC_004353.4_cds_NP_001245408.1_30262	0.400857	0.274472	0.374699
lcl|NC_004353.4_cds_NP_001245409.1_30269	0.39454	0.274	0.347443
lcl|NC_004353.4_cds_NP_001245410.1_30271	0.390335	0.290779	0.340621
lcl|NC_004353.4_cds_NP_001245411.1_30275	0.395335	0.28609	0.327957
lcl|NC_004353.4_cds_NP_001245412.1_30277	0.387797	0.281316	0.312043
lcl|NC_004353.4_cds_NP_001245413.1_30288	0.39316	0.28304	0.359612
lcl|NC_004353.4_cds_NP_001245414.1_30287	0.393165	0.282304	0.360131
lcl|NC_004353.4_cds_NP_001245416.1_30294	0.382908	0.25912	0.335845
lcl|NC_004353.4_cds_NP_001245417.1_30300	0.382268	0.258411	0.316195
lcl|NC_004353.4_cds_NP_001245420.1_30325	0.409719	0.304362	0.368135
lcl|NC_004353.4_cds_NP_001245421.1_30331	0.429339	0.396777	0.401944
lcl|NC_004353.4_cds_NP_001245422.1_30333	0.425535	0.389316	0.403597
lcl|NC_004353.4_cds_NP_001245425.1_30352	0.413978	0.337963	0.365844
lcl|NC_004353.4_cds_NP_001245426.1_30423	0.406928	0.301538	0.368017
lcl|NC_004353.4_cds_NP_001245427.1_30427	0.408286	0.296812	0.366387
lcl|NC_004353.4_cds_NP_001245428.1_30444	0.402489	0.288816	0.353048
lcl|NC_004353.4_cds_NP_001245429.2_30451	0.456814	0.378979	0.38842
lcl|NC_004353.4_cds_NP_001245430.1_30471	0.38727	0.272312	0.355768
lcl|NC_004353.4_cds_NP_001245435.2_30500	0.400344	0.269541	0.36345
lcl|NC_004353.4_cds_NP_001245436.1_30508	0.40117	0.283223	0.360187
lcl|NC_004353.4_cds_NP_001245437.1_30507	0.399745	0.287772	0.353175
lcl|NC_004353.4_cds_NP_001245439.1_30512	0.404498	0.279525	0.363543
lcl|NC_004353.4_cds_NP_001245440.1_30514	0.404895	0.279957	0.364677
lcl|NC_004353.4_cds_NP_001259043.1_30251	0.390483	0.27783	0.353236
lcl|NC_004353.4_cds_NP_001259044.1_30258	0.378323	0.260432	0.343574
lcl|NC_004353.4_cds_NP_001259045.1_30257	0.377811	0.260245	0.343036
lcl|NC_004353.4_cds_NP_001259046.1_30256	0.378132	0.260621	0.343331
lcl|NC_004353.4_cds_NP_001259047.1_30263	0.371594	0.240703	0.35191
lcl|NC_004353.4_cds_NP_001259049.1_30286	0.399976	0.286852	0.371356
lcl|NC_004353.4_cds_NP_001259050.1_30295	0.383764	0.259301	0.338301
lcl|NC_004353.4_cds_NP_001259051.1_30298	0.39114	0.276421	0.351161
lcl|NC_004353.4_cds_NP_001259052.1_30306	0.412305	0.299972	0.383452
lcl|NC_004353.4_cds_NP_001259053.1_30313	0.392194	0.280289	0.339241
lcl|NC_004353.4_cds_NP_001259054.1_30346	0.398631	0.301066	0.330342
lcl|NC_004353.4_cds_NP_001259055.1_30344	0.401601	0.292374	0.335631
lcl|NC_004353.4_cds_NP_001259056.1_30342	0.402599	0.298762	0.33689
lcl|NC_004353.4_cds_NP_001259057.1_30345	0.400408	0.299661	0.332698
lcl|NC_004353.4_cds_NP_001259058.1_30348	0.399032	0.29288	0.330775
lcl|NC_004353.4_cds_NP_001259059.1_30353	0.413641	0.338133	0.366117
lcl|NC_004353.4_cds_NP_001259060.1_30355	0.391702	0.316033	0.345999
lcl|NC_004353.4_cds_NP_001259061.1_30361	0.417744	0.282968	0.347496
lcl|NC_004353.4_cds_NP_001259062.1_30358	0.42012	0.285297	0.357536
lcl|NC_004353.4_cds_NP_001259063.1_30363	0.41976	0.278262	0.347755
lcl|NC_004353.4_cds_NP_001259064.1_30365	0.451875	0.357097	0.347906
lcl|NC_004353.4_cds_NP_001259065.1_30372	0.426038	0.366455	0.363303
lcl|NC_004353.4_cds_NP_001259066.1_30392	0.402771	0.297733	0.353094
lcl|NC_004353.4_cds_NP_001259067.1_30393	0.405917	0.306922	0.365253
lcl|NC_004353.4_cds_NP_001259068.1_30394	0.398219	0.284377	0.353289
lcl|NC_004353.4_cds_NP_001259069.1_30395	0.398219	0.284377	0.353289
lcl|NC_004353.4_cds_NP_001259070.1_30396	0.398219	0.284377	0.353289
lcl|NC_004353.4_cds_NP_001259071.1_30409	0.435963	0.332346	0.392002
lcl|NC_004353.4_cds_NP_001259072.1_30408	0.435685	0.331261	0.392348
lcl|NC_004353.4_cds_NP_001259073.1_30414	0.402668	0.333956	0.348435
lcl|NC_004353.4_cds_NP_001259074.1_30415	0.402668	0.333956	0.348435
lcl|NC_004353.4_cds_NP_001259075.1_30421	0.405375	0.299797	0.36703
lcl|NC_004353.4_cds_NP_001259076.1_30432	0.396354	0.289731	0.356489
lcl|NC_004353.4_cds_NP_001259077.1_30433	0.401188	0.294043	0.353682
lcl|NC_004353.4_cds_NP_001259078.1_30435	0.397097	0.300226	0.356964
lcl|NC_004353.4_cds_NP_001259079.1_30440	0.409141	0.315661	0.374579
lcl|NC_004353.4_cds_NP_001259080.1_30443	0.391707	0.287736	0.32822
lcl|NC_004353.4_cds_NP_001259081.1_30452	0.481559	0.403905	0.429714
lcl|NC_004353.4_cds_NP_001259082.1_30455	0.396428	0.297935	0.361394
lcl|NC_004353.4_cds_NP_001259083.1_30460	0.394437	0.296227	0.360577
lcl|NC_004353.4_cds_NP_001259084.1_30459	0.394085	0.296843	0.35948
lcl|NC_004353.4_cds_NP_001259085.1_30473	0.415777	0.307403	0.382007
lcl|NC_004353.4_cds_NP_001259086.1_30487	0.397816	0.292416	0.362077
lcl|NC_004353.4_cds_NP_001259087.1_30489	0.426263	0.298983	0.39511
lcl|NC_004353.4_cds_NP_001284709.1_30255	0.446464	0.32507	0.428008
lcl|NC_004353.4_cds_NP_001284710.1_30276	0.387136	0.264197	0.289511
lcl|NC_004353.4_cds_NP_001284711.1_30278	0.428342	0.341646	0.333065
lcl|NC_004353.4_cds_NP_001284712.1_30280	0.404325	0.324198	0.36075
lcl|NC_004353.4_cds_NP_001284713.1_30309	0.390749	0.285768	0.322327
lcl|NC_004353.4_cds_NP_001284714.1_30349	0.399032	0.29288	0.330775
lcl|NC_004353.4_cds_NP_001284715.1_30356	0.391702	0.316033	0.345999
lcl|NC_004353.4_cds_NP_001284716.1_30407	0.436179	0.33139	0.392095
lcl|NC_004353.4_cds_NP_001284717.1_30424	0.407355	0.3029	0.368366
lcl|NC_004353.4_cds_NP_001284718.1_30434	0.379557	0.281296	0.33923
lcl|NC_004353.4_cds_NP_001284719.1_30454	0.483203	0.407389	0.431091
lcl|NC_004353.4_cds_NP_001284720.1_30474	0.415777	0.307403	0.382007
lcl|NC_004353.4_cds_NP_001284721.1_30475	0.415777	0.307403	0.382007
lcl|NC_004353.4_cds_NP_001284722.1_30486	0.398182	0.292802	0.362404
lcl|NC_004353.4_cds_NP_001284723.1_30495	0.387578	0.265972	0.34113
lcl|NC_004353.4_cds_NP_001334686.1_30341	0.412708	0.290386	0.360831
lcl|NC_004353.4_cds_NP_524616.2_30223	0.393538	0.284316	0.355759
lcl|NC_004353.4_cds_NP_524617.3_30225	0.387113	0.286877	0.337656
lcl|NC_004353.4_cds_NP_524618.1_30228	0.466682	0.382833	0.435929
lcl|NC_004353.4_cds_NP_524619.3_30233	0.405276	0.305079	0.367646
lcl|NC_004353.4_cds_NP_524621.2_30326	0.409719	0.303955	0.368367
lcl|NC_004353.4_cds_NP_524622.1_30335	0.427275	0.331646	0.383996
lcl|NC_004353.4_cds_NP_524623.2_30351	0.41403	0.338011	0.365918
lcl|NC_004353.4_cds_NP_524624.1_30357	0.42012	0.285297	0.357536
lcl|NC_004353.4_cds_NP_524625.3_30373	0.397516	0.283468	0.350555
lcl|NC_004353.4_cds_NP_524626.1_30379	0.382894	0.286803	0.349701
lcl|NC_004353.4_cds_NP_524628.2_30402	0.414549	0.353446	0.356319
lcl|NC_004353.4_cds_NP_524630.1_30497	0.387607	0.278275	0.342825
lcl|NC_004353.4_cds_NP_524631.1_30488	0.426263	0.298983	0.39511
lcl|NC_004353.4_cds_NP_524632.1_30484	0.398182	0.292802	0.362404
lcl|NC_004353.4_cds_NP_524633.3_30477	0.378904	0.306628	0.334273
lcl|NC_004353.4_cds_NP_524634.2_30472	0.415777	0.307403	0.382007
lcl|NC_004353.4_cds_NP_524635.3_30457	0.396255	0.297345	0.361724
lcl|NC_004353.4_cds_NP_524637.2_30445	0.402542	0.288935	0.353338
lcl|NC_004353.4_cds_NP_524638.3_30442	0.392206	0.288703	0.330012
lcl|NC_004353.4_cds_NP_524639.2_30431	0.396354	0.289731	0.356489
lcl|NC_004353.4_cds_NP_524640.3_30428	0.402568	0.292902	0.350792
lcl|NC_004353.4_cds_NP_524842.2_30371	0.426038	0.366455	0.363303
lcl|NC_004353.4_cds_NP_651905.1_30261	0.402027	0.27558	0.375803
lcl|NC_004353.4_cds_NP_651906.1_30264	0.39454	0.274	0.347443
lcl|NC_004353.4_cds_NP_651908.1_30272	0.39814	0.289632	0.33176
lcl|NC_004353.4_cds_NP_651912.3_30281	0.401915	0.302001	0.378918
lcl|NC_004353.4_cds_NP_651913.1_30282	0.402545	0.29433	0.372059
lcl|NC_004353.4_cds_NP_651914.3_30296	0.381636	0.257624	0.33336
lcl|NC_004353.4_cds_NP_651918.2_30305	0.412305	0.299972	0.383452
lcl|NC_004353.4_cds_NP_651919.3_30308	0.390749	0.285768	0.322327
lcl|NC_004353.4_cds_NP_651922.1_30334	0.404043	0.319787	0.346317
lcl|NC_004353.4_cds_NP_651923.2_30340	0.397364	0.272159	0.351919
lcl|NC_004353.4_cds_NP_651924.2_30343	0.401996	0.297866	0.336466
lcl|NC_004353.4_cds_NP_651925.1_30354	0.391702	0.316033	0.345999
lcl|NC_004353.4_cds_NP_651926.1_30364	0.451875	0.357097	0.347906
lcl|NC_004353.4_cds_NP_651927.1_30366	0.402549	0.312553	0.32796
lcl|NC_004353.4_cds_NP_651928.1_30369	0.412341	0.319856	0.350276
lcl|NC_004353.4_cds_NP_651930.2_30380	0.4171	0.3084	0.365363
lcl|NC_004353.4_cds_NP_651931.1_30384	0.397062	0.292876	0.31888
lcl|NC_004353.4_cds_NP_651933.1_30391	0.400034	0.29685	0.345797
lcl|NC_004353.4_cds_NP_651934.2_30397	0.398219	0.284377	0.353289
lcl|NC_004353.4_cds_NP_651936.1_30410	0.38918	0.282636	0.352747
lcl|NC_004353.4_cds_NP_651939.4_30496	0.383128	0.25282	0.346644
lcl|NC_004353.4_cds_NP_651941.2_30491	0.390643	0.274984	0.353767
lcl|NC_004353.4_cds_NP_651942.2_30476	0.398326	0.304867	0.35191
lcl|NC_004353.4_cds_NP_651943.2_30450	0.456814	0.378979	0.38842
lcl|NC_004353.4_cds_NP_651944.1_30448	0.452562	0.424905	0.351869
lcl|NC_004353.4_cds_NP_651949.2_30422	0.406928	0.301538	0.368017
lcl|NC_004353.4_cds_NP_651950.3_30417	0.409835	0.310287	0.352977
lcl|NC_004353.4_cds_NP_651951.1_30416	0.408777	0.331633	0.355954
lcl|NC_004353.4_cds_NP_652015.1_30469	0.385819	0.271311	0.352316
lcl|NC_004353.4_cds_NP_726518.1_30230	0.456585	0.369	0.427006
lcl|NC_004353.4_cds_NP_726522.1_30231	0.405276	0.305079	0.367646
lcl|NC_004353.4_cds_NP_726524.1_30232	0.405276	0.305079	0.367646
lcl|NC_004353.4_cds_NP_726527.2_30235	0.40774	0.306158	0.36985
lcl|NC_004353.4_cds_NP_726528.2_30239	0.398138	0.286534	0.358366
lcl|NC_004353.4_cds_NP_726532.1_30245	0.38292	0.271988	0.343255
lcl|NC_004353.4_cds_NP_726533.1_30247	0.380593	0.268373	0.339507
lcl|NC_004353.4_cds_NP_726534.2_30248	0.39027	0.278245	0.353207
lcl|NC_004353.4_cds_NP_726535.1_30250	0.381171	0.271568	0.344546
lcl|NC_004353.4_cds_NP_726536.2_30249	0.39027	0.278245	0.353207
lcl|NC_004353.4_cds_NP_726537.1_30252	0.381278	0.270218	0.344205
lcl|NC_004353.4_cds_NP_726538.1_30253	0.396298	0.271824	0.353291
lcl|NC_004353.4_cds_NP_726539.1_30254	0.446464	0.32507	0.428008
lcl|NC_004353.4_cds_NP_726542.1_30265	0.39454	0.274	0.347443
lcl|NC_004353.4_cds_NP_726543.1_30266	0.39454	0.274	0.347443
lcl|NC_004353.4_cds_NP_726544.1_30267	0.39454	0.274	0.347443
lcl|NC_004353.4_cds_NP_726546.1_30268	0.39454	0.274	0.347443
lcl|NC_004353.4_cds_NP_726548.1_30270	0.391326	0.289627	0.343293
lcl|NC_004353.4_cds_NP_726549.1_30273	0.39814	0.289632	0.33176
lcl|NC_004353.4_cds_NP_726550.1_30274	0.39684	0.28782	0.325912
lcl|NC_004353.4_cds_NP_726551.2_30279	0.404325	0.324198	0.36075
lcl|NC_004353.4_cds_NP_726553.2_30290	0.39464	0.290315	0.365537
lcl|NC_004353.4_cds_NP_726554.2_30283	0.397956	0.28582	0.364158
lcl|NC_004353.4_cds_NP_726557.3_30301	0.379423	0.254529	0.32016
lcl|NC_004353.4_cds_NP_726558.2_30304	0.381683	0.259985	0.311617
lcl|NC_004353.4_cds_NP_726560.5_30302	0.379423	0.254529	0.32016
lcl|NC_004353.4_cds_NP_726561.1_30307	0.398621	0.285506	0.36768
lcl|NC_004353.4_cds_NP_726563.1_30312	0.393434	0.28281	0.340456
lcl|NC_004353.4_cds_NP_726564.5_30316	0.417406	0.302673	0.376047
lcl|NC_004353.4_cds_NP_726565.5_30317	0.417406	0.302673	0.376047
lcl|NC_004353.4_cds_NP_726566.1_30327	0.409719	0.303955	0.368367
lcl|NC_004353.4_cds_NP_726567.2_30329	0.408591	0.302128	0.366181
lcl|NC_004353.4_cds_NP_726568.2_30330	0.429619	0.396741	0.402307
lcl|NC_004353.4_cds_NP_726569.1_30336	0.427275	0.331646	0.383996
lcl|NC_004353.4_cds_NP_726570.1_30337	0.427275	0.331646	0.383996
lcl|NC_004353.4_cds_NP_726571.2_30338	0.432152	0.333812	0.394917
lcl|NC_004353.4_cds_NP_726574.1_30339	0.431776	0.334987	0.396392
lcl|NC_004353.4_cds_NP_726576.2_30347	0.399769	0.298701	0.332253
lcl|NC_004353.4_cds_NP_726577.2_30350	0.399622	0.29619	0.327219
lcl|NC_004353.4_cds_NP_726579.1_30359	0.417744	0.282968	0.347496
lcl|NC_004353.4_cds_NP_726580.1_30360	0.417744	0.282968	0.347496
lcl|NC_004353.4_cds_NP_726581.1_30362	0.422278	0.280709	0.358392
lcl|NC_004353.4_cds_NP_726583.1_30367	0.402549	0.312553	0.32796
lcl|NC_004353.4_cds_NP_726584.1_30368	0.402549	0.312553	0.32796
lcl|NC_004353.4_cds_NP_726586.1_30370	0.412341	0.319856	0.350276
lcl|NC_004353.4_cds_NP_726588.2_30376	0.397531	0.284272	0.351333
lcl|NC_004353.4_cds_NP_726589.2_30374	0.397178	0.284138	0.349638
lcl|NC_004353.4_cds_NP_726590.2_30375	0.397178	0.284138	0.349638
lcl|NC_004353.4_cds_NP_726591.2_30377	0.39731	0.284118	0.350885
lcl|NC_004353.4_cds_NP_726594.2_30381	0.417378	0.308772	0.366946
lcl|NC_004353.4_cds_NP_726596.1_30387	0.420245	0.33647	0.375542
lcl|NC_004353.4_cds_NP_726597.1_30388	0.420245	0.33647	0.375542
lcl|NC_004353.4_cds_NP_726599.2_30385	0.420368	0.336407	0.375684
lcl|NC_004353.4_cds_NP_726600.1_30389	0.420245	0.33647	0.375542
lcl|NC_004353.4_cds_NP_726601.1_30390	0.420245	0.33647	0.375542
lcl|NC_004353.4_cds_NP_726604.1_30398	0.391759	0.284617	0.348555
lcl|NC_004353.4_cds_NP_726605.1_30399	0.391759	0.284617	0.348555
lcl|NC_004353.4_cds_NP_726606.1_30400	0.391759	0.284617	0.348555
lcl|NC_004353.4_cds_NP_726607.1_30404	0.414354	0.358433	0.359398
lcl|NC_004353.4_cds_NP_726610.1_30411	0.38918	0.282636	0.352747
lcl|NC_004353.4_cds_NP_726612.1_30413	0.402668	0.333956	0.348435
lcl|NC_004353.4_cds_NP_726614.2_30425	0.407422	0.303017	0.368465
lcl|NC_004353.4_cds_NP_726615.1_30426	0.408226	0.296703	0.366297
lcl|NC_004353.4_cds_NP_726618.3_30438	0.396696	0.299709	0.356976
lcl|NC_004353.4_cds_NP_726619.2_30436	0.396696	0.299709	0.356976
lcl|NC_004353.4_cds_NP_726620.2_30437	0.396696	0.299709	0.356976
lcl|NC_004353.4_cds_NP_726627.1_30446	0.403759	0.286408	0.349883
lcl|NC_004353.4_cds_NP_726628.1_30447	0.403759	0.286408	0.349883
lcl|NC_004353.4_cds_NP_726630.2_30449	0.450645	0.369179	0.377905
lcl|NC_004353.4_cds_NP_726631.1_30453	0.483203	0.407389	0.431091
lcl|NC_004353.4_cds_NP_726633.2_30458	0.396255	0.297345	0.361724
lcl|NC_004353.4_cds_NP_726634.1_30461	0.396554	0.296375	0.362897
lcl|NC_004353.4_cds_NP_726635.2_30465	0.39487	0.29603	0.361579
lcl|NC_004353.4_cds_NP_726636.2_30462	0.396554	0.296375	0.362897
lcl|NC_004353.4_cds_NP_726638.1_30467	0.386433	0.272201	0.35185
lcl|NC_004353.4_cds_NP_726639.1_30468	0.385589	0.270813	0.351663
lcl|NC_004353.4_cds_NP_726642.1_30470	0.385819	0.271311	0.352316
lcl|NC_004353.4_cds_NP_726645.3_30480	0.380904	0.313502	0.332297
lcl|NC_004353.4_cds_NP_726646.1_30485	0.398182	0.292802	0.362404
lcl|NC_004353.4_cds_NP_726648.2_30492	0.390229	0.275879	0.349952
lcl|NC_004353.4_cds_NP_726649.3_30490	0.390643	0.274984	0.353767
lcl|NC_004353.4_cds_NP_726650.2_30493	0.387578	0.265972	0.34113
lcl|NC_004353.4_cds_NP_726651.1_30498	0.387607	0.278275	0.342825
lcl|NC_004353.4_cds_NP_787122.1_30243	0.403231	0.297282	0.358307
lcl|NC_004353.4_cds_NP_787123.1_30241	0.403231	0.297282	0.358307
lcl|NC_004353.4_cds_NP_787124.1_30242	0.403231	0.297282	0.358307
lcl|NC_004353.4_cds_NP_995587.1_30246	0.389525	0.276448	0.35052
lcl|NC_004353.4_cds_NP_995588.1_30291	0.391656	0.282366	0.367731
lcl|NC_004353.4_cds_NP_995592.2_30299	0.391017	0.276739	0.35098
lcl|NC_004353.4_cds_NP_995593.2_30303	0.379098	0.258503	0.330125
lcl|NC_004353.4_cds_NP_995594.1_30311	0.379375	0.28572	0.326128
lcl|NC_004353.4_cds_NP_995595.1_30328	0.409719	0.303955	0.368367
lcl|NC_004353.4_cds_NP_995596.1_30332	0.429339	0.396777	0.401944
lcl|NC_004353.4_cds_NP_995598.1_30406	0.43615	0.331197	0.392211
lcl|NC_004353.4_cds_NP_995600.2_30418	0.409835	0.310287	0.352977
lcl|NC_004354.4_cds_NP_001014706.2_29	0.46111	0.445108	0.38486
lcl|NC_004354.4_cds_NP_001014707.1_35	0.442728	0.403569	0.39793
lcl|NC_004354.4_cds_NP_001014708.1_32	0.456628	0.421206	0.412733
lcl|NC_004354.4_cds_NP_001014709.1_36	0.446369	0.418173	0.405254
lcl|NC_004354.4_cds_NP_001014710.1_43	0.452199	0.420425	0.40856
lcl|NC_004354.4_cds_NP_001014711.1_34	0.457228	0.431747	0.416763
lcl|NC_004354.4_cds_NP_001014712.1_42	0.449596	0.402655	0.400332
lcl|NC_004354.4_cds_NP_001014713.1_103	0.479795	0.473888	0.413939
lcl|NC_004354.4_cds_NP_001014714.1_364	0.526357	0.592611	0.460622
lcl|NC_004354.4_cds_NP_001014715.1_367	0.531435	0.609327	0.458419
lcl|NC_004354.4_cds_NP_001014716.1_368	0.531435	0.609327	0.458419
lcl|NC_004354.4_cds_NP_001014717.1_609	0.503518	0.562	0.387915
lcl|NC_004354.4_cds_NP_001014718.1_607	0.499098	0.512412	0.412389
lcl|NC_004354.4_cds_NP_001014719.2_928	0.551184	0.567583	0.494659
lcl|NC_004354.4_cds_NP_001014720.1_1035	0.520964	0.512676	0.480202
lcl|NC_004354.4_cds_NP_001014721.1_1036	0.520964	0.512676	0.480202
lcl|NC_004354.4_cds_NP_001014722.1_1068	0.499017	0.543101	0.448615
lcl|NC_004354.4_cds_NP_001014723.1_1105	0.425999	0.386701	0.383748
lcl|NC_004354.4_cds_NP_001014724.1_1106	0.425999	0.386701	0.383748
lcl|NC_004354.4_cds_NP_001014725.1_1331	0.595333	0.751439	0.583632
lcl|NC_004354.4_cds_NP_001014726.1_1332	0.595333	0.751439	0.583632
lcl|NC_004354.4_cds_NP_001014727.2_2006	0.463655	0.515076	0.425498
lcl|NC_004354.4_cds_NP_001014728.1_2237	0.483137	0.487559	0.447797
lcl|NC_004354.4_cds_NP_001014729.1_2241	0.476445	0.472427	0.437623
lcl|NC_004354.4_cds_NP_001014730.1_2302	0.437256	0.41026	0.395466
lcl|NC_004354.4_cds_NP_001014731.1_2787	0.467603	0.436992	0.437294
lcl|NC_004354.4_cds_NP_001014732.1_2858	0.439345	0.373784	0.380397
lcl|NC_004354.4_cds_NP_001014733.1_2851	0.439346	0.376295	0.376835
lcl|NC_004354.4_cds_NP_001014734.1_2849	0.439409	0.376085	0.376846
lcl|NC_004354.4_cds_NP_001014735.1_2857	0.439408	0.373575	0.38041
lcl|NC_004354.4_cds_NP_001014736.2_3098	0.454795	0.461077	0.389483
lcl|NC_004354.4_cds_NP_001014737.1_3192	0.65723	0.656611	0.636569
lcl|NC_004354.4_cds_NP_001014738.2_3188	0.65674	0.654825	0.635419
lcl|NC_004354.4_cds_NP_001014739.1_3181	0.660879	0.664516	0.639219
lcl|NC_004354.4_cds_NP_001014740.1_3260	0.498322	0.523667	0.444514
lcl|NC_004354.4_cds_NP_001014741.1_3261	0.498322	0.523667	0.444514
lcl|NC_004354.4_cds_NP_001014742.1_3536	0.529153	0.576386	0.467996
lcl|NC_004354.4_cds_NP_001014743.1_3564	0.44609	0.430093	0.398243
lcl|NC_004354.4_cds_NP_001014744.1_3560	0.450487	0.446781	0.40079
lcl|NC_004354.4_cds_NP_001014745.1_3609	0.473015	0.494045	0.399231
lcl|NC_004354.4_cds_NP_001014746.1_3889	0.460746	0.417311	0.413407
lcl|NC_004354.4_cds_NP_001014747.1_3941	0.495546	0.464152	0.424269
lcl|NC_004354.4_cds_NP_001014749.1_4324	0.490045	0.505645	0.447242
lcl|NC_004354.4_cds_NP_001014750.1_4417	0.496148	0.535058	0.41375
lcl|NC_004354.4_cds_NP_001014752.2_4775	0.518469	0.532701	0.466129
lcl|NC_004354.4_cds_NP_001014753.1_4776	0.519264	0.533757	0.466848
lcl|NC_004354.4_cds_NP_001014754.1_4777	0.540134	0.599947	0.481127
lcl|NC_004354.4_cds_NP_001014755.1_4778	0.540134	0.599947	0.481127
lcl|NC_004354.4_cds_NP_001014756.1_4779	0.540134	0.599947	0.481127
lcl|NC_004354.4_cds_NP_001014757.2_4962	0.484027	0.507059	0.403063
lcl|NC_004354.4_cds_NP_001014758.2_4966	0.48162	0.503139	0.401178
lcl|NC_004354.4_cds_NP_001014759.1_4967	0.501754	0.530677	0.437432
lcl|NC_004354.4_cds_NP_001014760.2_4964	0.481715	0.50299	0.401149
lcl|NC_004354.4_cds_NP_001015241.3_5387	0.478794	0.43732	0.410844
lcl|NC_004354.4_cds_NP_001015254.1_5376	0.460542	0.430325	0.35811
lcl|NC_004354.4_cds_NP_001015255.1_5375	0.490543	0.562514	0.472141
lcl|NC_004354.4_cds_NP_001015256.2_5372	0.482074	0.471211	0.439533
lcl|NC_004354.4_cds_NP_001015257.2_5370	0.481211	0.469729	0.438667
lcl|NC_004354.4_cds_NP_001015258.3_5369	0.433003	0.356146	0.396572
lcl|NC_004354.4_cds_NP_001015260.3_5361	0.462116	0.441357	0.417347
lcl|NC_004354.4_cds_NP_001015261.3_5362	0.459236	0.435934	0.4105
lcl|NC_004354.4_cds_NP_001015262.1_5363	0.462196	0.44178	0.417176
lcl|NC_004354.4_cds_NP_001015263.1_5365	0.473451	0.465655	0.424707
lcl|NC_004354.4_cds_NP_001027032.1_16	0.476743	0.453119	0.441912
lcl|NC_004354.4_cds_NP_001027033.3_697	0.480004	0.482656	0.434878
lcl|NC_004354.4_cds_NP_001027034.1_701	0.477642	0.486475	0.432489
lcl|NC_004354.4_cds_NP_001027035.3_689	0.481255	0.486104	0.43572
lcl|NC_004354.4_cds_NP_001027036.3_703	0.479185	0.48297	0.437698
lcl|NC_004354.4_cds_NP_001027037.3_690	0.480791	0.484786	0.435483
lcl|NC_004354.4_cds_NP_001027038.3_699	0.4794	0.485026	0.432844
lcl|NC_004354.4_cds_NP_001027039.2_797	0.484626	0.529928	0.430014
lcl|NC_004354.4_cds_NP_001027041.1_1430	0.563893	0.65022	0.474778
lcl|NC_004354.4_cds_NP_001027042.2_1461	0.412714	0.287689	0.394484
lcl|NC_004354.4_cds_NP_001027043.2_1462	0.416617	0.29336	0.397764
lcl|NC_004354.4_cds_NP_001027044.2_1463	0.412211	0.288536	0.393218
lcl|NC_004354.4_cds_NP_001027045.2_1467	0.414032	0.287261	0.396085
lcl|NC_004354.4_cds_NP_001027046.2_1468	0.412691	0.289543	0.393658
lcl|NC_004354.4_cds_NP_001027047.2_1469	0.417132	0.293683	0.397914
lcl|NC_004354.4_cds_NP_001027048.1_1523	0.542784	0.62202	0.51712
lcl|NC_004354.4_cds_NP_001027049.1_1530	0.47983	0.510027	0.422381
lcl|NC_004354.4_cds_NP_001027050.1_1531	0.47983	0.510027	0.422381
lcl|NC_004354.4_cds_NP_001027051.1_1532	0.47983	0.510027	0.422381
lcl|NC_004354.4_cds_NP_001027052.1_1533	0.47983	0.510027	0.422381
lcl|NC_004354.4_cds_NP_001027053.1_1534	0.47983	0.510027	0.422381
lcl|NC_004354.4_cds_NP_001027054.1_1535	0.47983	0.510027	0.422381
lcl|NC_004354.4_cds_NP_001027058.1_1613	0.436145	0.420235	0.367617
lcl|NC_004354.4_cds_NP_001027059.1_1608	0.484031	0.522709	0.433643
lcl|NC_004354.4_cds_NP_001027060.1_1615	0.429957	0.414264	0.366636
lcl|NC_004354.4_cds_NP_001027062.1_1652	0.478052	0.469783	0.398462
lcl|NC_004354.4_cds_NP_001027063.1_1656	0.476276	0.477106	0.393592
lcl|NC_004354.4_cds_NP_001027064.1_1672	0.407912	0.39287	0.381081
lcl|NC_004354.4_cds_NP_001027065.1_1661	0.474728	0.475468	0.392861
lcl|NC_004354.4_cds_NP_001027066.1_1669	0.431018	0.4154	0.404424
lcl|NC_004354.4_cds_NP_001027068.1_4244	0.45178	0.416267	0.403703
lcl|NC_004354.4_cds_NP_001027069.3_4246	0.438889	0.429162	0.354154
lcl|NC_004354.4_cds_NP_001027070.1_4517	0.487485	0.542688	0.423392
lcl|NC_004354.4_cds_NP_001027071.1_4824	0.497013	0.550822	0.441985
lcl|NC_004354.4_cds_NP_001027072.1_4825	0.497013	0.550822	0.441985
lcl|NC_004354.4_cds_NP_001027073.1_4826	0.497013	0.550822	0.441985
lcl|NC_004354.4_cds_NP_001027074.1_4832	0.538382	0.536452	0.519129
lcl|NC_004354.4_cds_NP_001027075.1_4833	0.538382	0.536452	0.519129
lcl|NC_004354.4_cds_NP_001027078.1_4908	0.533311	0.634109	0.503351
lcl|NC_004354.4_cds_NP_001027079.1_4910	0.522691	0.665152	0.490641
lcl|NC_004354.4_cds_NP_001027080.2_4963	0.48338	0.504552	0.40221
lcl|NC_004354.4_cds_NP_001027081.1_5159	0.46451	0.482764	0.394116
lcl|NC_004354.4_cds_NP_001027082.1_5153	0.453997	0.488844	0.397738
lcl|NC_004354.4_cds_NP_001027083.1_5194	0.512248	0.543894	0.467769
lcl|NC_004354.4_cds_NP_001027084.1_5195	0.512248	0.543894	0.467769
lcl|NC_004354.4_cds_NP_001027085.1_5192	0.480837	0.494202	0.396579
lcl|NC_004354.4_cds_NP_001027086.1_5193	0.480837	0.494202	0.396579
lcl|NC_004354.4_cds_NP_001027087.1_5218	0.472622	0.442919	0.435935
lcl|NC_004354.4_cds_NP_001027088.1_5219	0.472622	0.442919	0.435935
lcl|NC_004354.4_cds_NP_001027089.1_5215	0.477084	0.480662	0.393603
lcl|NC_004354.4_cds_NP_001033815.1_17	0.476743	0.453119	0.441912
lcl|NC_004354.4_cds_NP_001033816.1_107	0.490723	0.503325	0.413616
lcl|NC_004354.4_cds_NP_001033817.1_108	0.490723	0.503325	0.413616
lcl|NC_004354.4_cds_NP_001033818.1_163	0.570877	0.598223	0.546923
lcl|NC_004354.4_cds_NP_001033820.1_350	0.500806	0.567704	0.42341
lcl|NC_004354.4_cds_NP_001033821.1_428	0.446567	0.377845	0.421401
lcl|NC_004354.4_cds_NP_001033823.1_512	0.462636	0.505833	0.385483
lcl|NC_004354.4_cds_NP_001033827.1_681	0.499445	0.506557	0.458397
lcl|NC_004354.4_cds_NP_001033829.2_950	0.481422	0.527796	0.404299
lcl|NC_004354.4_cds_NP_001033831.1_1152	0.453821	0.488728	0.401989
lcl|NC_004354.4_cds_NP_001033832.1_1235	0.460888	0.487419	0.410126
lcl|NC_004354.4_cds_NP_001033834.1_1371	0.511652	0.538223	0.4559
lcl|NC_004354.4_cds_NP_001033835.2_1879	0.453578	0.464042	0.406101
lcl|NC_004354.4_cds_NP_001033836.1_1890	0.493835	0.51721	0.438764
lcl|NC_004354.4_cds_NP_001033837.1_1945	0.537229	0.616829	0.487659
lcl|NC_004354.4_cds_NP_001033838.1_2210	0.424395	0.351883	0.381348
lcl|NC_004354.4_cds_NP_001033839.1_2212	0.436227	0.353331	0.410617
lcl|NC_004354.4_cds_NP_001033841.1_3148	0.46117	0.440873	0.377173
lcl|NC_004354.4_cds_NP_001033842.1_3272	0.497561	0.586534	0.457858
lcl|NC_004354.4_cds_NP_001033843.1_3333	0.493157	0.494629	0.42853
lcl|NC_004354.4_cds_NP_001033845.1_3510	0.478479	0.523415	0.427325
lcl|NC_004354.4_cds_NP_001033847.1_3873	0.46986	0.534043	0.408475
lcl|NC_004354.4_cds_NP_001033848.1_3992	0.468764	0.476353	0.42037
lcl|NC_004354.4_cds_NP_001033850.2_4133	0.496454	0.555615	0.454163
lcl|NC_004354.4_cds_NP_001033852.1_4374	0.52562	0.520078	0.483211
lcl|NC_004354.4_cds_NP_001033853.1_4506	0.489612	0.456471	0.455927
lcl|NC_004354.4_cds_NP_001033855.1_4945	0.471437	0.478884	0.418266
lcl|NC_004354.4_cds_NP_001033857.1_5302	0.459967	0.43098	0.382649
lcl|NC_004354.4_cds_NP_001033858.1_5307	0.458815	0.427402	0.378327
lcl|NC_004354.4_cds_NP_001033859.1_5308	0.458815	0.427402	0.378327
lcl|NC_004354.4_cds_NP_001033860.1_5336	0.441504	0.385742	0.380265
lcl|NC_004354.4_cds_NP_001036253.1_115	0.462998	0.520241	0.397687
lcl|NC_004354.4_cds_NP_001036254.1_118	0.474638	0.443765	0.408231
lcl|NC_004354.4_cds_NP_001036255.1_207	0.45832	0.520595	0.391543
lcl|NC_004354.4_cds_NP_001036256.2_246	0.457615	0.476321	0.38269
lcl|NC_004354.4_cds_NP_001036259.2_741	0.464564	0.447554	0.425506
lcl|NC_004354.4_cds_NP_001036260.3_891	0.429467	0.387097	0.379924
lcl|NC_004354.4_cds_NP_001036261.3_1162	0.464039	0.46522	0.421621
lcl|NC_004354.4_cds_NP_001036262.2_1643	0.470956	0.491704	0.407438
lcl|NC_004354.4_cds_NP_001036263.1_1887	0.492005	0.520113	0.436373
lcl|NC_004354.4_cds_NP_001036264.2_2062	0.50788	0.55232	0.446261
lcl|NC_004354.4_cds_NP_001036265.1_2219	0.487784	0.500166	0.418828
lcl|NC_004354.4_cds_NP_001036266.1_2330	0.448145	0.424341	0.404926
lcl|NC_004354.4_cds_NP_001036267.1_2332	0.443937	0.42373	0.399532
lcl|NC_004354.4_cds_NP_001036268.2_2500	0.474766	0.448673	0.44522
lcl|NC_004354.4_cds_NP_001036269.2_2536	0.485586	0.502622	0.421856
lcl|NC_004354.4_cds_NP_001036273.2_2890	0.443816	0.422856	0.367173
lcl|NC_004354.4_cds_NP_001036275.1_3466	0.462788	0.456366	0.390348
lcl|NC_004354.4_cds_NP_001036276.1_3486	0.503391	0.537611	0.456447
lcl|NC_004354.4_cds_NP_001036277.2_3488	0.491376	0.487887	0.44435
lcl|NC_004354.4_cds_NP_001036278.1_3782	0.495855	0.458215	0.4454
lcl|NC_004354.4_cds_NP_001036279.1_3783	0.495855	0.458215	0.4454
lcl|NC_004354.4_cds_NP_001036280.1_4050	0.467841	0.430834	0.416896
lcl|NC_004354.4_cds_NP_001036281.1_4052	0.468884	0.431426	0.42053
lcl|NC_004354.4_cds_NP_001036282.1_4203	0.497475	0.503409	0.435187
lcl|NC_004354.4_cds_NP_001036283.1_4258	0.470006	0.486538	0.409251
lcl|NC_004354.4_cds_NP_001036284.1_4282	0.4922	0.550006	0.428482
lcl|NC_004354.4_cds_NP_001036285.2_5085	0.482363	0.550463	0.389467
lcl|NC_004354.4_cds_NP_001036286.1_5170	0.471574	0.468296	0.405465
lcl|NC_004354.4_cds_NP_001036287.1_5168	0.466101	0.453509	0.398679
lcl|NC_004354.4_cds_NP_001036303.2_5338	0.442656	0.410064	0.366006
lcl|NC_004354.4_cds_NP_001036306.3_5337	0.442656	0.410064	0.366006
lcl|NC_004354.4_cds_NP_001036309.1_5340	0.471343	0.478558	0.375019
lcl|NC_004354.4_cds_NP_001036311.2_5342	0.49703	0.530618	0.432798
lcl|NC_004354.4_cds_NP_001036312.1_5341	0.49703	0.530618	0.432798
lcl|NC_004354.4_cds_NP_001036313.1_5343	0.484776	0.496013	0.419462
lcl|NC_004354.4_cds_NP_001036314.1_5345	0.469593	0.450505	0.415013
lcl|NC_004354.4_cds_NP_001036316.1_5350	0.468981	0.405054	0.423135
lcl|NC_004354.4_cds_NP_001036317.1_5351	0.468981	0.405054	0.423135
lcl|NC_004354.4_cds_NP_001036318.2_5348	0.470484	0.435564	0.411619
lcl|NC_004354.4_cds_NP_001036319.2_5347	0.470484	0.435564	0.411619
lcl|NC_004354.4_cds_NP_001036320.3_5354	0.406104	0.327576	0.318043
lcl|NC_004354.4_cds_NP_001036321.2_5355	0.478605	0.475062	0.363082
lcl|NC_004354.4_cds_NP_001036322.1_5357	0.479032	0.467296	0.350158
lcl|NC_004354.4_cds_NP_001036323.1_5358	0.524809	0.51041	0.441355
lcl|NC_004354.4_cds_NP_001036324.1_5360	0.532388	0.532419	0.473929
lcl|NC_004354.4_cds_NP_001096854.1_1	0.447748	0.397819	0.381039
lcl|NC_004354.4_cds_NP_001096855.1_5	0.451449	0.390645	0.387286
lcl|NC_004354.4_cds_NP_001096856.1_6	0.451449	0.390645	0.387286
lcl|NC_004354.4_cds_NP_001096858.1_73	0.506675	0.523194	0.455638
lcl|NC_004354.4_cds_NP_001096859.1_183	0.462104	0.474135	0.378284
lcl|NC_004354.4_cds_NP_001096860.2_200	0.45909	0.46432	0.395138
lcl|NC_004354.4_cds_NP_001096861.1_203	0.461643	0.46262	0.392116
lcl|NC_004354.4_cds_NP_001096862.1_250	0.52123	0.591338	0.453747
lcl|NC_004354.4_cds_NP_001096864.1_330	0.477951	0.390586	0.434861
lcl|NC_004354.4_cds_NP_001096865.1_567	0.456172	0.433771	0.421499
lcl|NC_004354.4_cds_NP_001096866.1_640	0.404811	0.298273	0.385325
lcl|NC_004354.4_cds_NP_001096867.3_652	0.466985	0.466188	0.412219
lcl|NC_004354.4_cds_NP_001096868.3_677	0.463468	0.460867	0.392126
lcl|NC_004354.4_cds_NP_001096869.3_684	0.479209	0.480917	0.433315
lcl|NC_004354.4_cds_NP_001096870.1_746	0.477425	0.477191	0.435158
lcl|NC_004354.4_cds_NP_001096871.1_793	0.450174	0.471156	0.384018
lcl|NC_004354.4_cds_NP_001096873.1_920	0.464096	0.474255	0.407727
lcl|NC_004354.4_cds_NP_001096877.1_936	0.474341	0.486298	0.40932
lcl|NC_004354.4_cds_NP_001096879.2_1126	0.491703	0.591118	0.415947
lcl|NC_004354.4_cds_NP_001096880.1_1136	0.455771	0.451154	0.419116
lcl|NC_004354.4_cds_NP_001096881.1_1137	0.455771	0.451154	0.419116
lcl|NC_004354.4_cds_NP_001096882.1_1138	0.455771	0.451154	0.419116
lcl|NC_004354.4_cds_NP_001096883.3_1189	0.506008	0.503411	0.462006
lcl|NC_004354.4_cds_NP_001096884.1_1186	0.506008	0.503411	0.462006
lcl|NC_004354.4_cds_NP_001096885.2_1205	0.438057	0.359657	0.376798
lcl|NC_004354.4_cds_NP_001096887.1_1240	0.499202	0.420571	0.45447
lcl|NC_004354.4_cds_NP_001096888.2_1363	0.49246	0.526141	0.422885
lcl|NC_004354.4_cds_NP_001096889.1_1387	0.482143	0.501109	0.406262
lcl|NC_004354.4_cds_NP_001096890.1_1410	0.526587	0.605137	0.443254
lcl|NC_004354.4_cds_NP_001096891.1_1436	0.466114	0.458227	0.41519
lcl|NC_004354.4_cds_NP_001096892.1_1491	0.487122	0.519123	0.431933
lcl|NC_004354.4_cds_NP_001096893.1_1483	0.474931	0.441477	0.432379
lcl|NC_004354.4_cds_NP_001096895.1_1485	0.476002	0.442465	0.433512
lcl|NC_004354.4_cds_NP_001096896.1_1486	0.466004	0.428705	0.422702
lcl|NC_004354.4_cds_NP_001096897.1_1583	0.510158	0.537065	0.451857
lcl|NC_004354.4_cds_NP_001096899.2_1681	0.496945	0.537733	0.449841
lcl|NC_004354.4_cds_NP_001096900.3_1683	0.497533	0.541318	0.452646
lcl|NC_004354.4_cds_NP_001096901.1_1715	0.453587	0.395771	0.394556
lcl|NC_004354.4_cds_NP_001096903.2_1748	0.416297	0.365435	0.373952
lcl|NC_004354.4_cds_NP_001096905.1_1919	0.460943	0.407873	0.409832
lcl|NC_004354.4_cds_NP_001096906.1_1932	0.534075	0.596986	0.496267
lcl|NC_004354.4_cds_NP_001096907.1_1931	0.513531	0.563818	0.475662
lcl|NC_004354.4_cds_NP_001096908.1_1958	0.46542	0.466137	0.422006
lcl|NC_004354.4_cds_NP_001096910.1_1964	0.479495	0.506308	0.428572
lcl|NC_004354.4_cds_NP_001096911.1_1959	0.46542	0.466137	0.422006
lcl|NC_004354.4_cds_NP_001096912.1_1960	0.46542	0.466137	0.422006
lcl|NC_004354.4_cds_NP_001096913.1_1983	0.4798	0.532484	0.426426
lcl|NC_004354.4_cds_NP_001096914.1_1984	0.4798	0.532484	0.426426
lcl|NC_004354.4_cds_NP_001096916.1_2063	0.512723	0.548766	0.4378
lcl|NC_004354.4_cds_NP_001096917.1_2076	0.505373	0.545132	0.430435
lcl|NC_004354.4_cds_NP_001096918.1_2118	0.492794	0.525076	0.428855
lcl|NC_004354.4_cds_NP_001096919.1_2190	0.475526	0.527978	0.434958
lcl|NC_004354.4_cds_NP_001096921.1_2196	0.476961	0.505777	0.41999
lcl|NC_004354.4_cds_NP_001096922.1_2200	0.480681	0.526211	0.411737
lcl|NC_004354.4_cds_NP_001096923.1_2199	0.47325	0.455882	0.403746
lcl|NC_004354.4_cds_NP_001096924.2_2203	0.497885	0.546394	0.45696
lcl|NC_004354.4_cds_NP_001096927.2_2251	0.464794	0.526547	0.410994
lcl|NC_004354.4_cds_NP_001096928.1_2276	0.466224	0.42783	0.411435
lcl|NC_004354.4_cds_NP_001096929.2_2277	0.466224	0.42783	0.411435
lcl|NC_004354.4_cds_NP_001096930.1_2285	0.484438	0.493498	0.446505
lcl|NC_004354.4_cds_NP_001096931.1_2287	0.445522	0.408216	0.397739
lcl|NC_004354.4_cds_NP_001096932.1_2293	0.475594	0.437922	0.421207
lcl|NC_004354.4_cds_NP_001096933.1_2304	0.456702	0.413217	0.402868
lcl|NC_004354.4_cds_NP_001096934.2_2311	0.472293	0.423345	0.443587
lcl|NC_004354.4_cds_NP_001096935.1_2333	0.426985	0.398317	0.32485
lcl|NC_004354.4_cds_NP_001096936.1_2336	0.511615	0.58754	0.460797
lcl|NC_004354.4_cds_NP_001096938.1_2349	0.467992	0.486377	0.412694
lcl|NC_004354.4_cds_NP_001096941.2_2432	0.47101	0.477682	0.409787
lcl|NC_004354.4_cds_NP_001096944.1_2434	0.482235	0.484678	0.412982
lcl|NC_004354.4_cds_NP_001096945.1_2476	0.518061	0.613211	0.486608
lcl|NC_004354.4_cds_NP_001096946.1_2477	0.518061	0.613211	0.486608
lcl|NC_004354.4_cds_NP_001096947.1_2478	0.518061	0.613211	0.486608
lcl|NC_004354.4_cds_NP_001096948.2_2530	0.467892	0.476309	0.415735
lcl|NC_004354.4_cds_NP_001096949.1_2616	0.438757	0.385336	0.373027
lcl|NC_004354.4_cds_NP_001096950.2_2623	0.520594	0.563188	0.486113
lcl|NC_004354.4_cds_NP_001096951.3_2620	0.511047	0.542156	0.478299
lcl|NC_004354.4_cds_NP_001096954.1_2625	0.501352	0.551513	0.422898
lcl|NC_004354.4_cds_NP_001096955.1_2649	0.496752	0.508429	0.438167
lcl|NC_004354.4_cds_NP_001096956.1_2640	0.495414	0.501295	0.441293
lcl|NC_004354.4_cds_NP_001096957.1_2766	0.505965	0.548406	0.472486
lcl|NC_004354.4_cds_NP_001096958.1_2767	0.452075	0.471451	0.394264
lcl|NC_004354.4_cds_NP_001096959.1_2768	0.475958	0.494437	0.418415
lcl|NC_004354.4_cds_NP_001096960.1_2770	0.502058	0.56619	0.419299
lcl|NC_004354.4_cds_NP_001096961.1_2869	0.49596	0.532711	0.428057
lcl|NC_004354.4_cds_NP_001096962.1_2888	0.440554	0.383749	0.341793
lcl|NC_004354.4_cds_NP_001096963.1_2947	0.452983	0.421603	0.405661
lcl|NC_004354.4_cds_NP_001096964.1_2950	0.447212	0.408156	0.398526
lcl|NC_004354.4_cds_NP_001096965.1_3017	0.482322	0.466589	0.426773
lcl|NC_004354.4_cds_NP_001096966.2_3073	0.448502	0.434528	0.394414
lcl|NC_004354.4_cds_NP_001096967.1_3081	0.484916	0.458772	0.431394
lcl|NC_004354.4_cds_NP_001096969.1_3115	0.523921	0.581347	0.49055
lcl|NC_004354.4_cds_NP_001096972.1_3159	0.464836	0.44105	0.445233
lcl|NC_004354.4_cds_NP_001096973.1_3177	0.513522	0.534836	0.448764
lcl|NC_004354.4_cds_NP_001096974.1_3213	0.454531	0.462477	0.414558
lcl|NC_004354.4_cds_NP_001096975.1_3238	0.492517	0.496696	0.431627
lcl|NC_004354.4_cds_NP_001096977.1_3251	0.516227	0.542462	0.454374
lcl|NC_004354.4_cds_NP_001096978.1_3304	0.449453	0.4337	0.396683
lcl|NC_004354.4_cds_NP_001096980.2_3341	0.491626	0.540379	0.446487
lcl|NC_004354.4_cds_NP_001096981.2_3365	0.482591	0.516021	0.414434
lcl|NC_004354.4_cds_NP_001096983.2_3499	0.465476	0.465668	0.399509
lcl|NC_004354.4_cds_NP_001096984.1_3516	0.489159	0.544988	0.426507
lcl|NC_004354.4_cds_NP_001096985.2_3517	0.46322	0.449759	0.408617
lcl|NC_004354.4_cds_NP_001096987.2_3682	0.488996	0.48444	0.437389
lcl|NC_004354.4_cds_NP_001096988.2_3700	0.446651	0.413895	0.385221
lcl|NC_004354.4_cds_NP_001096989.1_3705	0.457316	0.410451	0.413482
lcl|NC_004354.4_cds_NP_001096990.1_3711	0.457142	0.413846	0.410658
lcl|NC_004354.4_cds_NP_001096991.1_3712	0.457142	0.413846	0.410658
lcl|NC_004354.4_cds_NP_001096992.1_3713	0.457142	0.413846	0.410658
lcl|NC_004354.4_cds_NP_001096993.1_3727	0.507085	0.516065	0.454813
lcl|NC_004354.4_cds_NP_001096994.1_3728	0.507085	0.516065	0.454813
lcl|NC_004354.4_cds_NP_001096996.1_3900	0.440533	0.40272	0.392147
lcl|NC_004354.4_cds_NP_001096997.1_3901	0.440156	0.402616	0.391674
lcl|NC_004354.4_cds_NP_001096998.1_3902	0.440156	0.402616	0.391674
lcl|NC_004354.4_cds_NP_001096999.1_3903	0.440156	0.402616	0.391674
lcl|NC_004354.4_cds_NP_001097000.1_3910	0.467065	0.418364	0.404861
lcl|NC_004354.4_cds_NP_001097001.1_4062	0.516535	0.519456	0.448555
lcl|NC_004354.4_cds_NP_001097002.1_4079	0.450521	0.412383	0.393709
lcl|NC_004354.4_cds_NP_001097003.1_4137	0.514865	0.622807	0.449421
lcl|NC_004354.4_cds_NP_001097004.1_4173	0.501309	0.537088	0.451784
lcl|NC_004354.4_cds_NP_001097005.1_4170	0.493689	0.524832	0.445897
lcl|NC_004354.4_cds_NP_001097006.1_4176	0.486553	0.563839	0.417027
lcl|NC_004354.4_cds_NP_001097008.2_4218	0.482608	0.507452	0.405254
lcl|NC_004354.4_cds_NP_001097009.1_4234	0.482022	0.473996	0.443119
lcl|NC_004354.4_cds_NP_001097010.1_4273	0.493386	0.490159	0.468499
lcl|NC_004354.4_cds_NP_001097011.1_4322	0.486065	0.485752	0.446805
lcl|NC_004354.4_cds_NP_001097012.1_4380	0.476891	0.507677	0.402234
lcl|NC_004354.4_cds_NP_001097013.1_4458	0.487053	0.468787	0.414036
lcl|NC_004354.4_cds_NP_001097014.1_4521	0.503412	0.549313	0.434084
lcl|NC_004354.4_cds_NP_001097015.1_4522	0.496731	0.556555	0.395753
lcl|NC_004354.4_cds_NP_001097016.2_4538	0.504968	0.567705	0.440157
lcl|NC_004354.4_cds_NP_001097017.1_4534	0.495122	0.553653	0.413393
lcl|NC_004354.4_cds_NP_001097018.1_4536	0.504968	0.567705	0.440157
lcl|NC_004354.4_cds_NP_001097019.1_4553	0.476536	0.48194	0.413324
lcl|NC_004354.4_cds_NP_001097020.1_4566	0.472795	0.472506	0.391772
lcl|NC_004354.4_cds_NP_001097021.1_4614	0.480618	0.52766	0.394843
lcl|NC_004354.4_cds_NP_001097022.2_4616	0.491957	0.482457	0.427765
lcl|NC_004354.4_cds_NP_001097023.1_4619	0.482212	0.53848	0.443794
lcl|NC_004354.4_cds_NP_001097027.1_4662	0.493743	0.527441	0.405392
lcl|NC_004354.4_cds_NP_001097028.1_4668	0.449097	0.424856	0.43027
lcl|NC_004354.4_cds_NP_001097029.1_4671	0.558406	0.703708	0.550053
lcl|NC_004354.4_cds_NP_001097030.1_4717	0.522005	0.59418	0.456366
lcl|NC_004354.4_cds_NP_001097031.2_4725	0.495102	0.528871	0.435995
lcl|NC_004354.4_cds_NP_001097032.2_4974	0.482964	0.617035	0.439945
lcl|NC_004354.4_cds_NP_001097033.1_4978	0.437061	0.36821	0.404844
lcl|NC_004354.4_cds_NP_001097034.2_5040	0.462788	0.385105	0.370129
lcl|NC_004354.4_cds_NP_001097038.2_5113	0.411655	0.289912	0.362453
lcl|NC_004354.4_cds_NP_001097040.1_5134	0.453024	0.472943	0.392116
lcl|NC_004354.4_cds_NP_001097041.2_5312	0.447291	0.404788	0.388104
lcl|NC_004354.4_cds_NP_001097042.1_5339	0.462165	0.463855	0.380532
lcl|NC_004354.4_cds_NP_001104071.2_5272	0.504056	0.5002	0.445309
lcl|NC_004354.4_cds_NP_001104090.1_5273	0.501006	0.495522	0.443008
lcl|NC_004354.4_cds_NP_001104467.2_5368	0.432097	0.356248	0.397868
lcl|NC_004354.4_cds_NP_001104470.1_5378	0.432896	0.339157	0.3957
lcl|NC_004354.4_cds_NP_001104471.1_5379	0.432896	0.339157	0.3957
lcl|NC_004354.4_cds_NP_001104472.1_5380	0.432896	0.339157	0.3957
lcl|NC_004354.4_cds_NP_001104473.1_5381	0.432896	0.339157	0.3957
lcl|NC_004354.4_cds_NP_001104474.1_5385	0.426461	0.366349	0.367442
lcl|NC_004354.4_cds_NP_001104479.1_5388	0.480534	0.443058	0.409877
lcl|NC_004354.4_cds_NP_001104480.2_5389	0.480534	0.443058	0.409877
lcl|NC_004354.4_cds_NP_001104481.2_5390	0.436853	0.419254	0.340633
lcl|NC_004354.4_cds_NP_001137539.1_5382	0.432896	0.339157	0.3957
lcl|NC_004354.4_cds_NP_001138136.1_23	0.489552	0.451243	0.40689
lcl|NC_004354.4_cds_NP_001138137.1_24	0.489552	0.451243	0.40689
lcl|NC_004354.4_cds_NP_001138139.1_54	0.415339	0.335978	0.368253
lcl|NC_004354.4_cds_NP_001138140.1_55	0.415339	0.335978	0.368253
lcl|NC_004354.4_cds_NP_001138141.1_98	0.469338	0.455408	0.395108
lcl|NC_004354.4_cds_NP_001138142.1_102	0.479795	0.473888	0.413939
lcl|NC_004354.4_cds_NP_001138143.2_150	0.529765	0.609769	0.517112
lcl|NC_004354.4_cds_NP_001138144.1_382	0.482876	0.561179	0.43142
lcl|NC_004354.4_cds_NP_001138145.1_456	0.464475	0.523079	0.450628
lcl|NC_004354.4_cds_NP_001138149.1_761	0.515047	0.608646	0.476396
lcl|NC_004354.4_cds_NP_001138150.1_871	0.466944	0.464859	0.409747
lcl|NC_004354.4_cds_NP_001138151.2_892	0.430315	0.400979	0.373477
lcl|NC_004354.4_cds_NP_001138152.1_914	0.470642	0.481988	0.406419
lcl|NC_004354.4_cds_NP_001138153.1_921	0.453503	0.445395	0.398988
lcl|NC_004354.4_cds_NP_001138154.1_915	0.470642	0.481988	0.406419
lcl|NC_004354.4_cds_NP_001138155.1_923	0.472096	0.48787	0.410858
lcl|NC_004354.4_cds_NP_001138156.1_1111	0.454991	0.414178	0.370113
lcl|NC_004354.4_cds_NP_001138157.2_1163	0.46854	0.467964	0.426017
lcl|NC_004354.4_cds_NP_001138158.2_1161	0.467687	0.463526	0.425701
lcl|NC_004354.4_cds_NP_001138159.2_1164	0.472552	0.478533	0.430263
lcl|NC_004354.4_cds_NP_001138160.2_1253	0.48019	0.496689	0.416246
lcl|NC_004354.4_cds_NP_001138161.2_1254	0.478354	0.4939	0.414499
lcl|NC_004354.4_cds_NP_001138162.1_1339	0.560642	0.653345	0.51906
lcl|NC_004354.4_cds_NP_001138163.1_1374	0.494754	0.56713	0.415962
lcl|NC_004354.4_cds_NP_001138164.1_1441	0.451092	0.448927	0.4106
lcl|NC_004354.4_cds_NP_001138165.1_1465	0.47171	0.474826	0.400839
lcl|NC_004354.4_cds_NP_001138166.1_1581	0.489354	0.523114	0.430793
lcl|NC_004354.4_cds_NP_001138167.1_1574	0.48794	0.528254	0.426877
lcl|NC_004354.4_cds_NP_001138168.1_1576	0.486104	0.520051	0.424821
lcl|NC_004354.4_cds_NP_001138169.1_1579	0.491614	0.532744	0.43344
lcl|NC_004354.4_cds_NP_001138171.1_1637	0.504409	0.524558	0.495404
lcl|NC_004354.4_cds_NP_001138172.1_1638	0.504409	0.524558	0.495404
lcl|NC_004354.4_cds_NP_001138173.1_1710	0.423029	0.328336	0.346724
lcl|NC_004354.4_cds_NP_001138175.1_1765	0.438018	0.388011	0.373695
lcl|NC_004354.4_cds_NP_001138176.1_1766	0.468214	0.470169	0.386127
lcl|NC_004354.4_cds_NP_001138177.1_1767	0.458123	0.463951	0.381793
lcl|NC_004354.4_cds_NP_001138179.1_2109	0.51601	0.570703	0.474543
lcl|NC_004354.4_cds_NP_001138180.1_2107	0.517293	0.569553	0.474555
lcl|NC_004354.4_cds_NP_001138182.3_2220	0.453611	0.481671	0.377027
lcl|NC_004354.4_cds_NP_001138183.1_2355	0.468646	0.477939	0.411823
lcl|NC_004354.4_cds_NP_001138184.1_2353	0.46945	0.481365	0.412204
lcl|NC_004354.4_cds_NP_001138185.2_2445	0.493977	0.554332	0.441271
lcl|NC_004354.4_cds_NP_001138186.1_2624	0.518865	0.557479	0.484899
lcl|NC_004354.4_cds_NP_001138187.1_2727	0.483946	0.505891	0.419956
lcl|NC_004354.4_cds_NP_001138189.1_2897	0.489394	0.537043	0.439775
lcl|NC_004354.4_cds_NP_001138190.1_2901	0.493659	0.542522	0.444166
lcl|NC_004354.4_cds_NP_001138191.1_2913	0.461654	0.454286	0.399518
lcl|NC_004354.4_cds_NP_001138192.1_2938	0.478931	0.523133	0.452339
lcl|NC_004354.4_cds_NP_001138193.1_3093	0.462875	0.409795	0.383317
lcl|NC_004354.4_cds_NP_001138194.1_3094	0.462875	0.409795	0.383317
lcl|NC_004354.4_cds_NP_001138195.1_3275	0.462461	0.464782	0.390246
lcl|NC_004354.4_cds_NP_001138196.1_3277	0.45613	0.446089	0.412448
lcl|NC_004354.4_cds_NP_001138197.2_3420	0.510066	0.556023	0.457035
lcl|NC_004354.4_cds_NP_001138198.1_3555	0.451721	0.441056	0.401253
lcl|NC_004354.4_cds_NP_001138199.1_3635	0.492216	0.572052	0.405759
lcl|NC_004354.4_cds_NP_001138200.1_3810	0.459034	0.466057	0.410552
lcl|NC_004354.4_cds_NP_001138201.1_3860	0.48082	0.455673	0.412601
lcl|NC_004354.4_cds_NP_001138202.1_3861	0.48082	0.455673	0.412601
lcl|NC_004354.4_cds_NP_001138203.1_3930	0.495924	0.487304	0.446972
lcl|NC_004354.4_cds_NP_001138204.1_3983	0.476019	0.484204	0.416344
lcl|NC_004354.4_cds_NP_001138205.1_4010	0.469226	0.435065	0.418035
lcl|NC_004354.4_cds_NP_001138206.1_4081	0.450278	0.410299	0.394195
lcl|NC_004354.4_cds_NP_001138209.1_4095	0.600409	0.691321	0.590078
lcl|NC_004354.4_cds_NP_001138210.1_4129	0.488682	0.545926	0.437815
lcl|NC_004354.4_cds_NP_001138211.1_4127	0.488261	0.546971	0.433432
lcl|NC_004354.4_cds_NP_001138212.1_4212	0.480802	0.51528	0.40259
lcl|NC_004354.4_cds_NP_001138213.1_4214	0.475285	0.412722	0.430443
lcl|NC_004354.4_cds_NP_001138214.2_4232	0.504479	0.559906	0.461628
lcl|NC_004354.4_cds_NP_001138215.1_4242	0.45178	0.416267	0.403703
lcl|NC_004354.4_cds_NP_001138216.1_4276	0.546884	0.539585	0.509118
lcl|NC_004354.4_cds_NP_001138217.1_4345	0.491599	0.465577	0.457514
lcl|NC_004354.4_cds_NP_001138218.1_4556	0.483947	0.563742	0.433012
lcl|NC_004354.4_cds_NP_001138219.1_4555	0.489524	0.556385	0.433505
lcl|NC_004354.4_cds_NP_001138220.1_4684	0.509531	0.537979	0.44385
lcl|NC_004354.4_cds_NP_001138221.1_4680	0.498785	0.522822	0.461712
lcl|NC_004354.4_cds_NP_001138222.1_5111	0.413801	0.293674	0.376741
lcl|NC_004354.4_cds_NP_001138223.2_5130	0.482797	0.503853	0.384694
lcl|NC_004354.4_cds_NP_001138224.1_5169	0.46576	0.453935	0.397958
lcl|NC_004354.4_cds_NP_001138225.1_5242	0.46878	0.434219	0.358725
lcl|NC_004354.4_cds_NP_001138226.1_5243	0.46878	0.434219	0.358725
lcl|NC_004354.4_cds_NP_001162626.1_8	0.44441	0.384077	0.391012
lcl|NC_004354.4_cds_NP_001162627.1_11	0.430019	0.364958	0.377911
lcl|NC_004354.4_cds_NP_001162628.1_46	0.484607	0.459784	0.443417
lcl|NC_004354.4_cds_NP_001162629.1_76	0.500293	0.564876	0.435741
lcl|NC_004354.4_cds_NP_001162630.1_166	0.406713	0.342244	0.321097
lcl|NC_004354.4_cds_NP_001162631.1_167	0.406713	0.342244	0.321097
lcl|NC_004354.4_cds_NP_001162632.2_331	0.477951	0.390586	0.434861
lcl|NC_004354.4_cds_NP_001162633.1_333	0.481773	0.531019	0.423648
lcl|NC_004354.4_cds_NP_001162634.1_342	0.511511	0.544307	0.465051
lcl|NC_004354.4_cds_NP_001162635.1_366	0.531435	0.609327	0.458419
lcl|NC_004354.4_cds_NP_001162636.1_365	0.527163	0.600504	0.453674
lcl|NC_004354.4_cds_NP_001162637.1_369	0.52583	0.593739	0.459653
lcl|NC_004354.4_cds_NP_001162638.2_380	0.472312	0.546123	0.417371
lcl|NC_004354.4_cds_NP_001162639.2_418	0.460714	0.459353	0.346937
lcl|NC_004354.4_cds_NP_001162640.1_416	0.460714	0.459353	0.346937
lcl|NC_004354.4_cds_NP_001162641.1_417	0.460714	0.459353	0.346937
lcl|NC_004354.4_cds_NP_001162642.1_450	0.532371	0.588246	0.500668
lcl|NC_004354.4_cds_NP_001162644.1_569	0.456571	0.426928	0.418157
lcl|NC_004354.4_cds_NP_001162645.1_639	0.524684	0.511146	0.497164
lcl|NC_004354.4_cds_NP_001162646.1_668	0.462705	0.488089	0.385
lcl|NC_004354.4_cds_NP_001162647.1_666	0.466656	0.488621	0.393955
lcl|NC_004354.4_cds_NP_001162648.3_696	0.480147	0.486693	0.433761
lcl|NC_004354.4_cds_NP_001162649.1_747	0.459208	0.444535	0.422058
lcl|NC_004354.4_cds_NP_001162650.1_749	0.458628	0.443758	0.410289
lcl|NC_004354.4_cds_NP_001162651.1_901	0.42937	0.401234	0.371624
lcl|NC_004354.4_cds_NP_001162652.1_909	0.438623	0.430091	0.375276
lcl|NC_004354.4_cds_NP_001162653.1_904	0.429816	0.401955	0.37203
lcl|NC_004354.4_cds_NP_001162654.1_910	0.439258	0.431192	0.375839
lcl|NC_004354.4_cds_NP_001162655.1_916	0.470642	0.481988	0.406419
lcl|NC_004354.4_cds_NP_001162657.1_993	0.476169	0.47208	0.4171
lcl|NC_004354.4_cds_NP_001162658.2_994	0.476169	0.47208	0.4171
lcl|NC_004354.4_cds_NP_001162659.2_1002	0.477606	0.480419	0.415377
lcl|NC_004354.4_cds_NP_001162660.1_997	0.477606	0.480419	0.415377
lcl|NC_004354.4_cds_NP_001162661.1_1040	0.523452	0.518965	0.485046
lcl|NC_004354.4_cds_NP_001162662.1_1046	0.446959	0.456522	0.402254
lcl|NC_004354.4_cds_NP_001162663.1_1047	0.446959	0.456522	0.402254
lcl|NC_004354.4_cds_NP_001162664.2_1054	0.475192	0.479545	0.424346
lcl|NC_004354.4_cds_NP_001162665.1_1088	0.477565	0.509683	0.398812
lcl|NC_004354.4_cds_NP_001162666.2_1086	0.480538	0.524022	0.421029
lcl|NC_004354.4_cds_NP_001162667.1_1121	0.477704	0.493946	0.414849
lcl|NC_004354.4_cds_NP_001162668.2_1120	0.481428	0.502435	0.421283
lcl|NC_004354.4_cds_NP_001162669.1_1141	0.46847	0.474509	0.404179
lcl|NC_004354.4_cds_NP_001162670.1_1142	0.46847	0.474509	0.404179
lcl|NC_004354.4_cds_NP_001162671.2_1139	0.464453	0.471936	0.401747
lcl|NC_004354.4_cds_NP_001162672.1_1143	0.46847	0.474509	0.404179
lcl|NC_004354.4_cds_NP_001162673.1_1150	0.457298	0.485788	0.396248
lcl|NC_004354.4_cds_NP_001162674.1_1156	0.456276	0.499365	0.412312
lcl|NC_004354.4_cds_NP_001162675.1_1157	0.456276	0.499365	0.412312
lcl|NC_004354.4_cds_NP_001162676.1_1247	0.500859	0.563139	0.444328
lcl|NC_004354.4_cds_NP_001162677.1_1269	0.452786	0.447553	0.398473
lcl|NC_004354.4_cds_NP_001162678.1_1276	0.480377	0.541929	0.357034
lcl|NC_004354.4_cds_NP_001162679.1_1479	0.476101	0.44182	0.433144
lcl|NC_004354.4_cds_NP_001162680.1_1487	0.466004	0.428705	0.422702
lcl|NC_004354.4_cds_NP_001162681.1_1538	0.472447	0.475314	0.398396
lcl|NC_004354.4_cds_NP_001162682.2_1597	0.467509	0.520131	0.394113
lcl|NC_004354.4_cds_NP_001162683.1_1600	0.471602	0.501833	0.376347
lcl|NC_004354.4_cds_NP_001162684.1_1631	0.534769	0.658438	0.496573
lcl|NC_004354.4_cds_NP_001162686.1_1655	0.479582	0.478379	0.396597
lcl|NC_004354.4_cds_NP_001162687.1_1667	0.431018	0.4154	0.404424
lcl|NC_004354.4_cds_NP_001162688.1_1651	0.481298	0.480145	0.39745
lcl|NC_004354.4_cds_NP_001162689.1_1666	0.479695	0.482882	0.409168
lcl|NC_004354.4_cds_NP_001162690.1_1660	0.474728	0.475468	0.392861
lcl|NC_004354.4_cds_NP_001162692.1_1736	0.431408	0.400448	0.382724
lcl|NC_004354.4_cds_NP_001162693.1_1774	0.535333	0.535861	0.464053
lcl|NC_004354.4_cds_NP_001162694.1_1775	0.535333	0.535861	0.464053
lcl|NC_004354.4_cds_NP_001162697.1_1812	0.519812	0.592415	0.459913
lcl|NC_004354.4_cds_NP_001162699.1_1822	0.478748	0.469492	0.410197
lcl|NC_004354.4_cds_NP_001162700.1_1916	0.371497	0.308398	0.319824
lcl|NC_004354.4_cds_NP_001162701.1_1920	0.460943	0.407873	0.409832
lcl|NC_004354.4_cds_NP_001162702.1_1927	0.498526	0.529151	0.425766
lcl|NC_004354.4_cds_NP_001162703.1_1951	0.521175	0.617584	0.505038
lcl|NC_004354.4_cds_NP_001162704.1_1970	0.509577	0.536953	0.46521
lcl|NC_004354.4_cds_NP_001162705.1_1967	0.504468	0.531132	0.461675
lcl|NC_004354.4_cds_NP_001162706.1_1971	0.509577	0.536953	0.46521
lcl|NC_004354.4_cds_NP_001162707.1_1989	0.493651	0.551689	0.411283
lcl|NC_004354.4_cds_NP_001162708.1_1993	0.515984	0.563833	0.45641
lcl|NC_004354.4_cds_NP_001162709.1_1994	0.515984	0.563833	0.45641
lcl|NC_004354.4_cds_NP_001162710.2_2001	0.500183	0.555761	0.445332
lcl|NC_004354.4_cds_NP_001162711.1_2081	0.486923	0.519234	0.438506
lcl|NC_004354.4_cds_NP_001162712.1_2080	0.503701	0.565005	0.455442
lcl|NC_004354.4_cds_NP_001162713.1_2095	0.532987	0.563149	0.471884
lcl|NC_004354.4_cds_NP_001162714.2_2098	0.488221	0.500257	0.453726
lcl|NC_004354.4_cds_NP_001162715.1_2463	0.517139	0.599875	0.445425
lcl|NC_004354.4_cds_NP_001162716.1_2467	0.495847	0.539265	0.437264
lcl|NC_004354.4_cds_NP_001162717.1_2494	0.487677	0.474898	0.456246
lcl|NC_004354.4_cds_NP_001162718.1_2648	0.489611	0.495106	0.433521
lcl|NC_004354.4_cds_NP_001162719.1_2657	0.483203	0.490766	0.439127
lcl|NC_004354.4_cds_NP_001162720.1_2645	0.429368	0.386181	0.376078
lcl|NC_004354.4_cds_NP_001162721.1_2673	0.534008	0.559481	0.476352
lcl|NC_004354.4_cds_NP_001162722.1_2671	0.531827	0.556867	0.475123
lcl|NC_004354.4_cds_NP_001162723.1_2689	0.488254	0.536624	0.433338
lcl|NC_004354.4_cds_NP_001162724.1_2690	0.488254	0.536624	0.433338
lcl|NC_004354.4_cds_NP_001162725.1_2708	0.516502	0.571542	0.446276
lcl|NC_004354.4_cds_NP_001162726.1_2769	0.542447	0.606199	0.522088
lcl|NC_004354.4_cds_NP_001162727.1_2841	0.425769	0.388352	0.387731
lcl|NC_004354.4_cds_NP_001162729.1_2906	0.494632	0.543867	0.445978
lcl|NC_004354.4_cds_NP_001162730.2_2898	0.489394	0.537043	0.439775
lcl|NC_004354.4_cds_NP_001162731.1_2903	0.493659	0.542522	0.444166
lcl|NC_004354.4_cds_NP_001162732.2_2896	0.489132	0.536656	0.439655
lcl|NC_004354.4_cds_NP_001162733.1_2940	0.463625	0.459333	0.404458
lcl|NC_004354.4_cds_NP_001162734.1_2943	0.458746	0.445073	0.400032
lcl|NC_004354.4_cds_NP_001162735.1_2962	0.456429	0.413465	0.409414
lcl|NC_004354.4_cds_NP_001162736.2_2965	0.443875	0.404808	0.401047
lcl|NC_004354.4_cds_NP_001162737.1_2972	0.537628	0.606797	0.483402
lcl|NC_004354.4_cds_NP_001162738.1_3129	0.544784	0.636216	0.508101
lcl|NC_004354.4_cds_NP_001162739.1_3156	0.496859	0.593731	0.458125
lcl|NC_004354.4_cds_NP_001162740.1_3158	0.477688	0.442169	0.402017
lcl|NC_004354.4_cds_NP_001162741.1_3182	0.64038	0.623531	0.6185
lcl|NC_004354.4_cds_NP_001162742.1_3194	0.63761	0.61914	0.61674
lcl|NC_004354.4_cds_NP_001162743.1_3191	0.641694	0.628937	0.620128
lcl|NC_004354.4_cds_NP_001162744.1_3187	0.661362	0.666033	0.639313
lcl|NC_004354.4_cds_NP_001162745.1_3214	0.454326	0.458804	0.414013
lcl|NC_004354.4_cds_NP_001162746.1_3211	0.455709	0.455843	0.420364
lcl|NC_004354.4_cds_NP_001162747.1_3216	0.465466	0.473385	0.411016
lcl|NC_004354.4_cds_NP_001162748.1_3269	0.499081	0.526202	0.444537
lcl|NC_004354.4_cds_NP_001162749.1_3265	0.497407	0.523155	0.442985
lcl|NC_004354.4_cds_NP_001162750.1_3266	0.498351	0.524291	0.443812
lcl|NC_004354.4_cds_NP_001162751.1_3263	0.495931	0.520102	0.441826
lcl|NC_004354.4_cds_NP_001162752.1_3307	0.522176	0.572007	0.461298
lcl|NC_004354.4_cds_NP_001162753.1_3393	0.486514	0.518482	0.425486
lcl|NC_004354.4_cds_NP_001162754.1_3394	0.486514	0.518482	0.425486
lcl|NC_004354.4_cds_NP_001162755.1_3395	0.486514	0.518482	0.425486
lcl|NC_004354.4_cds_NP_001162756.1_3422	0.480374	0.519654	0.428779
lcl|NC_004354.4_cds_NP_001162757.1_3423	0.480374	0.519654	0.428779
lcl|NC_004354.4_cds_NP_001162758.1_3458	0.543547	0.573033	0.491823
lcl|NC_004354.4_cds_NP_001162759.1_3460	0.553591	0.591594	0.493144
lcl|NC_004354.4_cds_NP_001162760.1_3549	0.505583	0.591377	0.424959
lcl|NC_004354.4_cds_NP_001162761.1_3718	0.457757	0.412004	0.411316
lcl|NC_004354.4_cds_NP_001162762.1_3719	0.457757	0.412004	0.411316
lcl|NC_004354.4_cds_NP_001162763.1_3742	0.4061	0.388331	0.376044
lcl|NC_004354.4_cds_NP_001162764.1_3761	0.43872	0.413425	0.357863
lcl|NC_004354.4_cds_NP_001162765.1_3770	0.486837	0.453981	0.445808
lcl|NC_004354.4_cds_NP_001162766.1_3777	0.497076	0.463589	0.447957
lcl|NC_004354.4_cds_NP_001162767.1_3774	0.496425	0.461742	0.447803
lcl|NC_004354.4_cds_NP_001162768.1_3780	0.495177	0.456326	0.445257
lcl|NC_004354.4_cds_NP_001162769.1_3792	0.463619	0.453782	0.419897
lcl|NC_004354.4_cds_NP_001162770.1_3795	0.442797	0.393599	0.392577
lcl|NC_004354.4_cds_NP_001162771.1_3856	0.431006	0.408967	0.38821
lcl|NC_004354.4_cds_NP_001162772.1_3858	0.429586	0.406775	0.387774
lcl|NC_004354.4_cds_NP_001162773.1_3950	0.449349	0.418215	0.400323
lcl|NC_004354.4_cds_NP_001162774.1_3949	0.462519	0.471413	0.419303
lcl|NC_004354.4_cds_NP_001162775.1_4101	0.509701	0.569294	0.439049
lcl|NC_004354.4_cds_NP_001162776.1_4098	0.495045	0.449794	0.469046
lcl|NC_004354.4_cds_NP_001162777.1_4151	0.504712	0.561334	0.454423
lcl|NC_004354.4_cds_NP_001162778.1_4152	0.504712	0.561334	0.454423
lcl|NC_004354.4_cds_NP_001162779.1_4182	0.447035	0.432664	0.372398
lcl|NC_004354.4_cds_NP_001162780.2_4316	0.482242	0.516053	0.416388
lcl|NC_004354.4_cds_NP_001162781.1_4340	0.483697	0.477229	0.431944
lcl|NC_004354.4_cds_NP_001162782.1_4424	0.523645	0.598612	0.473078
lcl|NC_004354.4_cds_NP_001162783.1_4427	0.493676	0.50065	0.403279
lcl|NC_004354.4_cds_NP_001162784.1_4425	0.523645	0.598612	0.473078
lcl|NC_004354.4_cds_NP_001162786.1_4434	0.493676	0.50065	0.403279
lcl|NC_004354.4_cds_NP_001162787.1_4433	0.529127	0.576435	0.455806
lcl|NC_004354.4_cds_NP_001162788.1_4453	0.381534	0.277277	0.318666
lcl|NC_004354.4_cds_NP_001162791.1_4598	0.553605	0.628593	0.487239
lcl|NC_004354.4_cds_NP_001162792.1_4639	0.492124	0.580237	0.43274
lcl|NC_004354.4_cds_NP_001162794.1_4728	0.522413	0.575921	0.47521
lcl|NC_004354.4_cds_NP_001162795.1_4736	0.433948	0.374922	0.377739
lcl|NC_004354.4_cds_NP_001162796.1_4749	0.502444	0.538931	0.447028
lcl|NC_004354.4_cds_NP_001162797.1_4791	0.494438	0.521645	0.435902
lcl|NC_004354.4_cds_NP_001162798.1_4786	0.497407	0.527934	0.437849
lcl|NC_004354.4_cds_NP_001162799.1_4890	0.513724	0.560328	0.425572
lcl|NC_004354.4_cds_NP_001162800.1_4971	0.430125	0.357025	0.398034
lcl|NC_004354.4_cds_NP_001162803.1_4977	0.454424	0.360382	0.42571
lcl|NC_004354.4_cds_NP_001162804.1_4994	0.577533	0.68869	0.512432
lcl|NC_004354.4_cds_NP_001162805.1_5031	0.515305	0.613217	0.448077
lcl|NC_004354.4_cds_NP_001162806.1_5032	0.422394	0.33334	0.377139
lcl|NC_004354.4_cds_NP_001162807.1_5066	0.425658	0.334407	0.381741
lcl|NC_004354.4_cds_NP_001162808.1_5069	0.521228	0.5856	0.48584
lcl|NC_004354.4_cds_NP_001162809.1_5072	0.458683	0.48054	0.398053
lcl|NC_004354.4_cds_NP_001162810.1_5081	0.453825	0.353566	0.403406
lcl|NC_004354.4_cds_NP_001162811.1_5083	0.452696	0.35308	0.401387
lcl|NC_004354.4_cds_NP_001162812.2_5095	0.485306	0.406545	0.452206
lcl|NC_004354.4_cds_NP_001162813.1_5211	0.489952	0.534196	0.416941
lcl|NC_004354.4_cds_NP_001162814.1_5268	0.532546	0.554935	0.460431
lcl|NC_004354.4_cds_NP_001162815.1_5269	0.532546	0.554935	0.460431
lcl|NC_004354.4_cds_NP_001162816.1_5271	0.542161	0.58007	0.467872
lcl|NC_004354.4_cds_NP_001162817.1_5270	0.532546	0.554935	0.460431
lcl|NC_004354.4_cds_NP_001163862.1_5377	0.436534	0.376087	0.413087
lcl|NC_004354.4_cds_NP_001188370.1_5386	0.426461	0.366349	0.367442
lcl|NC_004354.4_cds_NP_001188520.1_245	0.475446	0.443363	0.394862
lcl|NC_004354.4_cds_NP_001188522.1_287	0.508247	0.53033	0.449278
lcl|NC_004354.4_cds_NP_001188523.1_303	0.514983	0.597838	0.457456
lcl|NC_004354.4_cds_NP_001188524.1_374	0.439658	0.331777	0.402571
lcl|NC_004354.4_cds_NP_001188525.1_379	0.526558	0.64191	0.514677
lcl|NC_004354.4_cds_NP_001188526.1_387	0.503111	0.572847	0.462016
lcl|NC_004354.4_cds_NP_001188527.1_388	0.503111	0.572847	0.462016
lcl|NC_004354.4_cds_NP_001188528.1_437	0.478593	0.518535	0.413481
lcl|NC_004354.4_cds_NP_001188529.1_442	0.479346	0.528411	0.41112
lcl|NC_004354.4_cds_NP_001188530.1_518	0.461492	0.411628	0.395752
lcl|NC_004354.4_cds_NP_001188531.1_519	0.461492	0.411628	0.395752
lcl|NC_004354.4_cds_NP_001188532.1_523	0.586678	0.688454	0.557135
lcl|NC_004354.4_cds_NP_001188533.1_524	0.586678	0.688454	0.557135
lcl|NC_004354.4_cds_NP_001188534.1_534	0.464931	0.48112	0.390515
lcl|NC_004354.4_cds_NP_001188535.1_537	0.461155	0.483425	0.354708
lcl|NC_004354.4_cds_NP_001188536.1_538	0.461155	0.483425	0.354708
lcl|NC_004354.4_cds_NP_001188537.1_550	0.521537	0.550319	0.452768
lcl|NC_004354.4_cds_NP_001188538.1_648	0.44923	0.470516	0.405011
lcl|NC_004354.4_cds_NP_001188539.1_649	0.44923	0.470516	0.405011
lcl|NC_004354.4_cds_NP_001188540.1_675	0.460285	0.458341	0.388831
lcl|NC_004354.4_cds_NP_001188541.1_676	0.460285	0.458341	0.388831
lcl|NC_004354.4_cds_NP_001188542.1_711	0.522018	0.602896	0.447162
lcl|NC_004354.4_cds_NP_001188543.1_712	0.522018	0.602896	0.447162
lcl|NC_004354.4_cds_NP_001188544.1_713	0.522018	0.602896	0.447162
lcl|NC_004354.4_cds_NP_001188545.1_1171	0.493812	0.479944	0.459816
lcl|NC_004354.4_cds_NP_001188547.1_1302	0.52584	0.563561	0.45436
lcl|NC_004354.4_cds_NP_001188548.1_1492	0.4749	0.441563	0.432093
lcl|NC_004354.4_cds_NP_001188549.1_1489	0.465873	0.428755	0.423588
lcl|NC_004354.4_cds_NP_001188550.1_1562	0.521238	0.56972	0.488799
lcl|NC_004354.4_cds_NP_001188551.1_1563	0.521238	0.56972	0.488799
lcl|NC_004354.4_cds_NP_001188553.1_1691	0.466146	0.416359	0.436595
lcl|NC_004354.4_cds_NP_001188554.1_1698	0.41943	0.322485	0.367381
lcl|NC_004354.4_cds_NP_001188555.1_1707	0.456557	0.544937	0.450748
lcl|NC_004354.4_cds_NP_001188556.1_1712	0.416647	0.364675	0.393321
lcl|NC_004354.4_cds_NP_001188557.1_1713	0.402953	0.315948	0.383725
lcl|NC_004354.4_cds_NP_001188558.1_1878	0.483348	0.502538	0.423689
lcl|NC_004354.4_cds_NP_001188559.1_1876	0.483041	0.50224	0.423013
lcl|NC_004354.4_cds_NP_001188560.1_1877	0.483041	0.50224	0.423013
lcl|NC_004354.4_cds_NP_001188562.1_1939	0.493111	0.565545	0.461026
lcl|NC_004354.4_cds_NP_001188563.1_1946	0.515808	0.539603	0.454653
lcl|NC_004354.4_cds_NP_001188564.1_2061	0.506168	0.549368	0.445427
lcl|NC_004354.4_cds_NP_001188565.1_2071	0.498145	0.519005	0.442296
lcl|NC_004354.4_cds_NP_001188566.1_2078	0.49533	0.54059	0.449682
lcl|NC_004354.4_cds_NP_001188567.1_2082	0.486923	0.519234	0.438506
lcl|NC_004354.4_cds_NP_001188568.1_2180	0.492519	0.482649	0.414283
lcl|NC_004354.4_cds_NP_001188569.1_2181	0.505356	0.524766	0.435404
lcl|NC_004354.4_cds_NP_001188570.1_2183	0.479119	0.465152	0.407116
lcl|NC_004354.4_cds_NP_001188571.1_2228	0.541178	0.59439	0.498754
lcl|NC_004354.4_cds_NP_001188572.1_2230	0.477845	0.48773	0.430426
lcl|NC_004354.4_cds_NP_001188573.1_2235	0.473696	0.475233	0.433981
lcl|NC_004354.4_cds_NP_001188574.1_2239	0.476445	0.472427	0.437623
lcl|NC_004354.4_cds_NP_001188575.1_2247	0.48539	0.499231	0.440863
lcl|NC_004354.4_cds_NP_001188576.1_2246	0.485565	0.499585	0.441051
lcl|NC_004354.4_cds_NP_001188578.1_2612	0.49086	0.533108	0.417722
lcl|NC_004354.4_cds_NP_001188579.1_2752	0.515152	0.530228	0.471566
lcl|NC_004354.4_cds_NP_001188580.1_2753	0.515152	0.530228	0.471566
lcl|NC_004354.4_cds_NP_001188581.1_2754	0.515152	0.530228	0.471566
lcl|NC_004354.4_cds_NP_001188582.1_2755	0.515152	0.530228	0.471566
lcl|NC_004354.4_cds_NP_001188583.1_2760	0.551299	0.600875	0.527074
lcl|NC_004354.4_cds_NP_001188584.1_2761	0.551299	0.600875	0.527074
lcl|NC_004354.4_cds_NP_001188585.1_3144	0.487522	0.35673	0.480364
lcl|NC_004354.4_cds_NP_001188586.1_3285	0.471558	0.476417	0.391595
lcl|NC_004354.4_cds_NP_001188587.1_3287	0.470294	0.474491	0.390691
lcl|NC_004354.4_cds_NP_001188588.1_3294	0.507562	0.559911	0.45665
lcl|NC_004354.4_cds_NP_001188589.1_3300	0.448597	0.443729	0.393178
lcl|NC_004354.4_cds_NP_001188590.1_3462	0.527513	0.591909	0.471512
lcl|NC_004354.4_cds_NP_001188591.1_3471	0.472092	0.483007	0.396264
lcl|NC_004354.4_cds_NP_001188592.1_3469	0.463193	0.457015	0.390771
lcl|NC_004354.4_cds_NP_001188593.1_3532	0.470176	0.494839	0.383931
lcl|NC_004354.4_cds_NP_001188594.1_3802	0.432268	0.354442	0.40572
lcl|NC_004354.4_cds_NP_001188595.1_3797	0.432329	0.354406	0.405872
lcl|NC_004354.4_cds_NP_001188596.1_3801	0.432702	0.353416	0.401997
lcl|NC_004354.4_cds_NP_001188597.1_3800	0.428046	0.344211	0.402529
lcl|NC_004354.4_cds_NP_001188598.1_3819	0.416717	0.35878	0.375511
lcl|NC_004354.4_cds_NP_001188599.1_3820	0.41897	0.348092	0.355264
lcl|NC_004354.4_cds_NP_001188600.1_4043	0.467698	0.429121	0.419104
lcl|NC_004354.4_cds_NP_001188601.1_4051	0.469115	0.432197	0.420447
lcl|NC_004354.4_cds_NP_001188602.1_4031	0.468688	0.430965	0.419755
lcl|NC_004354.4_cds_NP_001188603.1_4012	0.467917	0.430309	0.419144
lcl|NC_004354.4_cds_NP_001188604.1_4026	0.468759	0.430881	0.419654
lcl|NC_004354.4_cds_NP_001188605.1_4040	0.469186	0.432119	0.42035
lcl|NC_004354.4_cds_NP_001188606.1_4021	0.470513	0.434382	0.421029
lcl|NC_004354.4_cds_NP_001188607.1_4035	0.470122	0.434086	0.421113
lcl|NC_004354.4_cds_NP_001188608.1_4037	0.467764	0.429031	0.419002
lcl|NC_004354.4_cds_NP_001188609.1_4034	0.468837	0.431266	0.420059
lcl|NC_004354.4_cds_NP_001188610.1_4028	0.468908	0.431183	0.41996
lcl|NC_004354.4_cds_NP_001188611.1_4047	0.467851	0.429427	0.419409
lcl|NC_004354.4_cds_NP_001188612.1_4020	0.46907	0.431242	0.419664
lcl|NC_004354.4_cds_NP_001188613.1_4030	0.470198	0.434014	0.421017
lcl|NC_004354.4_cds_NP_001188614.1_4036	0.470263	0.434371	0.42141
lcl|NC_004354.4_cds_NP_001188615.1_4038	0.467392	0.427984	0.418795
lcl|NC_004354.4_cds_NP_001188616.1_4045	0.467328	0.428077	0.418897
lcl|NC_004354.4_cds_NP_001188617.1_4032	0.468309	0.429896	0.419542
lcl|NC_004354.4_cds_NP_001188618.1_4029	0.468529	0.430115	0.419747
lcl|NC_004354.4_cds_NP_001188619.1_4041	0.468641	0.431379	0.420319
lcl|NC_004354.4_cds_NP_001188620.1_4042	0.468788	0.431672	0.420615
lcl|NC_004354.4_cds_NP_001188621.1_4023	0.470652	0.434668	0.421328
lcl|NC_004354.4_cds_NP_001188622.1_4024	0.468998	0.431325	0.419764
lcl|NC_004354.4_cds_NP_001188623.1_4022	0.470122	0.433282	0.420808
lcl|NC_004354.4_cds_NP_001188624.1_4025	0.468998	0.431325	0.419764
lcl|NC_004354.4_cds_NP_001188625.1_4005	0.4689	0.433613	0.417228
lcl|NC_004354.4_cds_NP_001188626.1_4044	0.46806	0.431598	0.416774
lcl|NC_004354.4_cds_NP_001188627.1_4018	0.46807	0.430611	0.419451
lcl|NC_004354.4_cds_NP_001188628.1_4008	0.469064	0.432477	0.420104
lcl|NC_004354.4_cds_NP_001188629.1_4015	0.467544	0.429251	0.418936
lcl|NC_004354.4_cds_NP_001188630.1_4004	0.468533	0.431097	0.419585
lcl|NC_004354.4_cds_NP_001188631.1_4016	0.467023	0.428552	0.418922
lcl|NC_004354.4_cds_NP_001188632.1_4013	0.467917	0.430309	0.419144
lcl|NC_004354.4_cds_NP_001188633.1_4006	0.467993	0.430366	0.419563
lcl|NC_004354.4_cds_NP_001188634.1_4003	0.468843	0.431457	0.419594
lcl|NC_004354.4_cds_NP_001188635.1_4046	0.466812	0.427398	0.418883
lcl|NC_004354.4_cds_NP_001188636.1_4039	0.467917	0.429339	0.419309
lcl|NC_004354.4_cds_NP_001188637.1_4033	0.468674	0.432391	0.417198
lcl|NC_004354.4_cds_NP_001188638.1_4027	0.468378	0.429809	0.419441
lcl|NC_004354.4_cds_NP_001188639.1_4057	0.434262	0.351466	0.367871
lcl|NC_004354.4_cds_NP_001188640.1_4001	0.46943	0.434357	0.420075
lcl|NC_004354.4_cds_NP_001188641.1_4000	0.470065	0.435187	0.420528
lcl|NC_004354.4_cds_NP_001188642.1_4054	0.467963	0.436425	0.414051
lcl|NC_004354.4_cds_NP_001188643.1_4053	0.468089	0.436309	0.413826
lcl|NC_004354.4_cds_NP_001188644.1_4002	0.469859	0.43336	0.420258
lcl|NC_004354.4_cds_NP_001188645.1_4009	0.46761	0.429161	0.418833
lcl|NC_004354.4_cds_NP_001188646.1_4017	0.46738	0.430998	0.416619
lcl|NC_004354.4_cds_NP_001188647.1_4007	0.468355	0.432848	0.417234
lcl|NC_004354.4_cds_NP_001188648.1_4019	0.468421	0.431589	0.420249
lcl|NC_004354.4_cds_NP_001188649.1_4014	0.467744	0.431727	0.418322
lcl|NC_004354.4_cds_NP_001188650.1_4055	0.477493	0.450599	0.418514
lcl|NC_004354.4_cds_NP_001188651.1_4011	0.468125	0.432825	0.418531
lcl|NC_004354.4_cds_NP_001188652.1_4056	0.471728	0.439969	0.415577
lcl|NC_004354.4_cds_NP_001188653.1_4178	0.486553	0.563839	0.417027
lcl|NC_004354.4_cds_NP_001188654.1_4237	0.477154	0.465925	0.424836
lcl|NC_004354.4_cds_NP_001188655.1_4238	0.477154	0.465925	0.424836
lcl|NC_004354.4_cds_NP_001188656.1_4239	0.46358	0.445316	0.415175
lcl|NC_004354.4_cds_NP_001188657.1_4243	0.45178	0.416267	0.403703
lcl|NC_004354.4_cds_NP_001188658.1_4281	0.492294	0.559479	0.432622
lcl|NC_004354.4_cds_NP_001188659.1_4286	0.496685	0.561627	0.436631
lcl|NC_004354.4_cds_NP_001188660.1_4283	0.48964	0.543659	0.428051
lcl|NC_004354.4_cds_NP_001188661.1_4279	0.44012	0.330712	0.364196
lcl|NC_004354.4_cds_NP_001188662.1_4386	0.464723	0.481691	0.398307
lcl|NC_004354.4_cds_NP_001188663.1_4378	0.47704	0.507369	0.40255
lcl|NC_004354.4_cds_NP_001188664.1_4399	0.528481	0.577124	0.495686
lcl|NC_004354.4_cds_NP_001188665.1_4410	0.550412	0.69232	0.461205
lcl|NC_004354.4_cds_NP_001188666.1_4411	0.550412	0.69232	0.461205
lcl|NC_004354.4_cds_NP_001188667.1_4409	0.513572	0.595122	0.448615
lcl|NC_004354.4_cds_NP_001188668.1_4446	0.417688	0.344649	0.366215
lcl|NC_004354.4_cds_NP_001188669.1_4515	0.487485	0.542688	0.423392
lcl|NC_004354.4_cds_NP_001188670.1_4516	0.487485	0.542688	0.423392
lcl|NC_004354.4_cds_NP_001188671.1_4772	0.51432	0.533713	0.442216
lcl|NC_004354.4_cds_NP_001188672.1_4798	0.506845	0.535793	0.441582
lcl|NC_004354.4_cds_NP_001188673.1_4800	0.533223	0.540521	0.460431
lcl|NC_004354.4_cds_NP_001188674.1_4931	0.486272	0.517856	0.423236
lcl|NC_004354.4_cds_NP_001188675.1_4933	0.485705	0.521202	0.420279
lcl|NC_004354.4_cds_NP_001188676.1_4982	0.528247	0.688859	0.45128
lcl|NC_004354.4_cds_NP_001188677.2_4981	0.532466	0.711667	0.470893
lcl|NC_004354.4_cds_NP_001188678.1_4984	0.518221	0.570166	0.430755
lcl|NC_004354.4_cds_NP_001245399.1_5374	0.48959	0.559778	0.471402
lcl|NC_004354.4_cds_NP_001245441.1_3	0.443738	0.384602	0.37563
lcl|NC_004354.4_cds_NP_001245442.1_2	0.444627	0.392052	0.371409
lcl|NC_004354.4_cds_NP_001245443.1_40	0.43353	0.397903	0.360327
lcl|NC_004354.4_cds_NP_001245444.1_41	0.438162	0.410815	0.372511
lcl|NC_004354.4_cds_NP_001245445.1_61	0.393173	0.295223	0.356072
lcl|NC_004354.4_cds_NP_001245446.1_62	0.445087	0.378738	0.420651
lcl|NC_004354.4_cds_NP_001245447.1_101	0.480678	0.473543	0.415101
lcl|NC_004354.4_cds_NP_001245448.1_112	0.523017	0.557541	0.465064
lcl|NC_004354.4_cds_NP_001245449.1_114	0.524039	0.563001	0.464175
lcl|NC_004354.4_cds_NP_001245450.1_109	0.522998	0.557482	0.465286
lcl|NC_004354.4_cds_NP_001245451.1_113	0.524643	0.560391	0.466625
lcl|NC_004354.4_cds_NP_001245452.1_110	0.524292	0.558835	0.466676
lcl|NC_004354.4_cds_NP_001245453.1_154	0.459022	0.450133	0.406755
lcl|NC_004354.4_cds_NP_001245456.1_221	0.557317	0.715617	0.509041
lcl|NC_004354.4_cds_NP_001245457.1_240	0.480077	0.464018	0.401753
lcl|NC_004354.4_cds_NP_001245458.1_241	0.484172	0.484853	0.407119
lcl|NC_004354.4_cds_NP_001245459.1_247	0.457615	0.476321	0.38269
lcl|NC_004354.4_cds_NP_001245460.1_279	0.461042	0.488703	0.375941
lcl|NC_004354.4_cds_NP_001245461.1_332	0.477951	0.390586	0.434861
lcl|NC_004354.4_cds_NP_001245462.1_390	0.507022	0.613459	0.461914
lcl|NC_004354.4_cds_NP_001245464.1_396	0.504027	0.52542	0.433272
lcl|NC_004354.4_cds_NP_001245465.1_402	0.495755	0.508451	0.426295
lcl|NC_004354.4_cds_NP_001245466.1_400	0.501698	0.521555	0.432627
lcl|NC_004354.4_cds_NP_001245467.1_404	0.514761	0.538104	0.441075
lcl|NC_004354.4_cds_NP_001245468.1_406	0.498062	0.509602	0.453603
lcl|NC_004354.4_cds_NP_001245469.1_424	0.450412	0.387831	0.389842
lcl|NC_004354.4_cds_NP_001245470.1_421	0.449345	0.375665	0.420117
lcl|NC_004354.4_cds_NP_001245471.1_425	0.449976	0.377872	0.420405
lcl|NC_004354.4_cds_NP_001245472.2_427	0.452533	0.38437	0.42285
lcl|NC_004354.4_cds_NP_001245473.1_430	0.441576	0.367241	0.415395
lcl|NC_004354.4_cds_NP_001245474.1_419	0.448861	0.381974	0.390039
lcl|NC_004354.4_cds_NP_001245475.1_426	0.449976	0.377872	0.420405
lcl|NC_004354.4_cds_NP_001245476.1_429	0.448907	0.384575	0.388288
lcl|NC_004354.4_cds_NP_001245477.1_431	0.45029	0.385481	0.388453
lcl|NC_004354.4_cds_NP_001245478.1_444	0.48244	0.536097	0.41293
lcl|NC_004354.4_cds_NP_001245479.1_445	0.48244	0.536097	0.41293
lcl|NC_004354.4_cds_NP_001245480.1_446	0.48244	0.536097	0.41293
lcl|NC_004354.4_cds_NP_001245481.1_438	0.478593	0.518535	0.413481
lcl|NC_004354.4_cds_NP_001245482.1_434	0.502381	0.467644	0.433643
lcl|NC_004354.4_cds_NP_001245483.1_489	0.482583	0.453337	0.403346
lcl|NC_004354.4_cds_NP_001245484.1_514	0.461215	0.411541	0.39628
lcl|NC_004354.4_cds_NP_001245485.1_515	0.461215	0.411541	0.39628
lcl|NC_004354.4_cds_NP_001245486.2_624	0.493375	0.532233	0.336637
lcl|NC_004354.4_cds_NP_001245487.1_645	0.503924	0.437738	0.46205
lcl|NC_004354.4_cds_NP_001245488.1_658	0.459402	0.399365	0.418534
lcl|NC_004354.4_cds_NP_001245489.1_659	0.459402	0.399365	0.418534
lcl|NC_004354.4_cds_NP_001245490.1_673	0.5223	0.568193	0.469142
lcl|NC_004354.4_cds_NP_001245491.2_698	0.479423	0.485189	0.433309
lcl|NC_004354.4_cds_NP_001245492.2_685	0.481439	0.484131	0.436809
lcl|NC_004354.4_cds_NP_001245493.2_695	0.480411	0.487562	0.434761
lcl|NC_004354.4_cds_NP_001245494.2_682	0.479818	0.482407	0.433648
lcl|NC_004354.4_cds_NP_001245495.2_700	0.477813	0.487357	0.432311
lcl|NC_004354.4_cds_NP_001245496.2_686	0.481447	0.484666	0.434735
lcl|NC_004354.4_cds_NP_001245497.2_691	0.480815	0.484296	0.435398
lcl|NC_004354.4_cds_NP_001245498.2_688	0.480483	0.483771	0.434154
lcl|NC_004354.4_cds_NP_001245499.2_694	0.480152	0.485549	0.434295
lcl|NC_004354.4_cds_NP_001245500.2_692	0.478741	0.481751	0.431695
lcl|NC_004354.4_cds_NP_001245501.1_704	0.4484	0.418291	0.393132
lcl|NC_004354.4_cds_NP_001245502.1_714	0.522682	0.6313	0.429529
lcl|NC_004354.4_cds_NP_001245503.1_717	0.499138	0.594187	0.454891
lcl|NC_004354.4_cds_NP_001245504.1_727	0.533132	0.641418	0.472702
lcl|NC_004354.4_cds_NP_001245505.1_817	0.476677	0.477684	0.43914
lcl|NC_004354.4_cds_NP_001245506.1_818	0.476677	0.477684	0.43914
lcl|NC_004354.4_cds_NP_001245507.1_819	0.476677	0.477684	0.43914
lcl|NC_004354.4_cds_NP_001245508.1_820	0.476677	0.477684	0.43914
lcl|NC_004354.4_cds_NP_001245509.1_783	0.499724	0.520311	0.432494
lcl|NC_004354.4_cds_NP_001245510.1_823	0.468965	0.49851	0.415936
lcl|NC_004354.4_cds_NP_001245511.1_899	0.452509	0.412084	0.395298
lcl|NC_004354.4_cds_NP_001245512.1_903	0.430017	0.402426	0.372233
lcl|NC_004354.4_cds_NP_001245513.1_906	0.438886	0.430723	0.375547
lcl|NC_004354.4_cds_NP_001245516.1_982	0.603954	0.689424	0.580652
lcl|NC_004354.4_cds_NP_001245517.1_998	0.477606	0.480419	0.415377
lcl|NC_004354.4_cds_NP_001245518.1_999	0.477606	0.480419	0.415377
lcl|NC_004354.4_cds_NP_001245519.1_995	0.476169	0.47208	0.4171
lcl|NC_004354.4_cds_NP_001245520.1_1000	0.477606	0.480419	0.415377
lcl|NC_004354.4_cds_NP_001245521.1_1001	0.477606	0.480419	0.415377
lcl|NC_004354.4_cds_NP_001245522.1_1011	0.519285	0.464382	0.451353
lcl|NC_004354.4_cds_NP_001245523.1_1017	0.44653	0.36306	0.444082
lcl|NC_004354.4_cds_NP_001245524.1_1018	0.44653	0.36306	0.444082
lcl|NC_004354.4_cds_NP_001245525.1_1019	0.432853	0.320764	0.420536
lcl|NC_004354.4_cds_NP_001245526.1_1042	0.435291	0.371771	0.338034
lcl|NC_004354.4_cds_NP_001245527.1_1044	0.446494	0.456051	0.401756
lcl|NC_004354.4_cds_NP_001245528.1_1049	0.447549	0.458278	0.402749
lcl|NC_004354.4_cds_NP_001245529.1_1051	0.468268	0.464844	0.422688
lcl|NC_004354.4_cds_NP_001245530.1_1097	0.537425	0.536556	0.51494
lcl|NC_004354.4_cds_NP_001245531.1_1196	0.54044	0.634333	0.463085
lcl|NC_004354.4_cds_NP_001245532.1_1215	0.483193	0.506419	0.447422
lcl|NC_004354.4_cds_NP_001245533.1_1244	0.57961	0.741009	0.56044
lcl|NC_004354.4_cds_NP_001245534.1_1265	0.495518	0.544294	0.463313
lcl|NC_004354.4_cds_NP_001245535.1_1285	0.466946	0.491484	0.385222
lcl|NC_004354.4_cds_NP_001245536.1_1303	0.52584	0.563561	0.45436
lcl|NC_004354.4_cds_NP_001245537.1_1306	0.488243	0.500075	0.4362
lcl|NC_004354.4_cds_NP_001245538.1_1318	0.415753	0.365005	0.370272
lcl|NC_004354.4_cds_NP_001245539.1_1319	0.449254	0.403402	0.354504
lcl|NC_004354.4_cds_NP_001245540.1_1360	0.485061	0.458	0.415012
lcl|NC_004354.4_cds_NP_001245541.1_1362	0.560345	0.652845	0.551218
lcl|NC_004354.4_cds_NP_001245542.1_1368	0.40515	0.34588	0.34805
lcl|NC_004354.4_cds_NP_001245543.1_1370	0.49892	0.528851	0.462373
lcl|NC_004354.4_cds_NP_001245544.1_1386	0.482991	0.502841	0.407537
lcl|NC_004354.4_cds_NP_001245545.1_1385	0.482259	0.501664	0.406269
lcl|NC_004354.4_cds_NP_001245546.1_1393	0.420629	0.327424	0.396346
lcl|NC_004354.4_cds_NP_001245547.1_1406	0.481005	0.49078	0.438272
lcl|NC_004354.4_cds_NP_001245548.1_1419	0.540829	0.589678	0.522197
lcl|NC_004354.4_cds_NP_001245549.1_1429	0.479891	0.5232	0.402802
lcl|NC_004354.4_cds_NP_001245550.1_1508	0.465302	0.448716	0.421843
lcl|NC_004354.4_cds_NP_001245551.1_1517	0.467065	0.510397	0.438045
lcl|NC_004354.4_cds_NP_001245552.1_1515	0.468235	0.512346	0.440745
lcl|NC_004354.4_cds_NP_001245553.1_1516	0.468235	0.512346	0.440745
lcl|NC_004354.4_cds_NP_001245554.1_1582	0.510342	0.537235	0.452308
lcl|NC_004354.4_cds_NP_001245557.1_1623	0.534413	0.640941	0.489723
lcl|NC_004354.4_cds_NP_001245558.1_1624	0.534413	0.640941	0.489723
lcl|NC_004354.4_cds_NP_001245561.1_1722	0.403273	0.31368	0.388752
lcl|NC_004354.4_cds_NP_001245563.1_1724	0.435586	0.36491	0.35094
lcl|NC_004354.4_cds_NP_001245565.1_1730	0.468203	0.452887	0.418202
lcl|NC_004354.4_cds_NP_001245567.1_1741	0.485674	0.507935	0.413232
lcl|NC_004354.4_cds_NP_001245568.1_1743	0.506013	0.511844	0.452423
lcl|NC_004354.4_cds_NP_001245569.1_1760	0.480263	0.419212	0.44189
lcl|NC_004354.4_cds_NP_001245570.1_1757	0.489401	0.438895	0.448567
lcl|NC_004354.4_cds_NP_001245571.1_1759	0.496027	0.438317	0.46363
lcl|NC_004354.4_cds_NP_001245572.1_1764	0.453955	0.403063	0.396542
lcl|NC_004354.4_cds_NP_001245573.1_1786	0.495147	0.544342	0.424219
lcl|NC_004354.4_cds_NP_001245574.1_1883	0.472155	0.497489	0.420525
lcl|NC_004354.4_cds_NP_001245575.1_1891	0.494543	0.511664	0.44486
lcl|NC_004354.4_cds_NP_001245576.1_1881	0.458735	0.477117	0.407836
lcl|NC_004354.4_cds_NP_001245577.1_1902	0.485341	0.511193	0.39055
lcl|NC_004354.4_cds_NP_001245578.1_1904	0.518672	0.544192	0.47122
lcl|NC_004354.4_cds_NP_001245579.1_1917	0.371497	0.308398	0.319824
lcl|NC_004354.4_cds_NP_001245580.1_1918	0.371497	0.308398	0.319824
lcl|NC_004354.4_cds_NP_001245581.1_1974	0.505525	0.528456	0.463073
lcl|NC_004354.4_cds_NP_001245582.1_2034	0.483275	0.491445	0.392028
lcl|NC_004354.4_cds_NP_001245583.1_2048	0.577089	0.613797	0.536483
lcl|NC_004354.4_cds_NP_001245584.1_2045	0.590332	0.640769	0.553311
lcl|NC_004354.4_cds_NP_001245585.1_2066	0.417665	0.317943	0.363277
lcl|NC_004354.4_cds_NP_001245586.1_2096	0.532987	0.563149	0.471884
lcl|NC_004354.4_cds_NP_001245587.1_2105	0.5074	0.548881	0.463577
lcl|NC_004354.4_cds_NP_001245588.1_2106	0.508136	0.549186	0.464378
lcl|NC_004354.4_cds_NP_001245589.1_2119	0.492794	0.525076	0.428855
lcl|NC_004354.4_cds_NP_001245590.1_2115	0.492912	0.524504	0.429126
lcl|NC_004354.4_cds_NP_001245591.1_2168	0.464441	0.50227	0.374939
lcl|NC_004354.4_cds_NP_001245592.1_2201	0.479141	0.516533	0.406797
lcl|NC_004354.4_cds_NP_001245593.1_2260	0.479667	0.524547	0.430615
lcl|NC_004354.4_cds_NP_001245595.1_2292	0.496568	0.521894	0.464062
lcl|NC_004354.4_cds_NP_001245596.1_2297	0.50746	0.567607	0.48688
lcl|NC_004354.4_cds_NP_001245597.1_2300	0.433936	0.393368	0.369279
lcl|NC_004354.4_cds_NP_001245598.1_2305	0.455496	0.385361	0.422858
lcl|NC_004354.4_cds_NP_001245599.1_2308	0.473648	0.44244	0.429727
lcl|NC_004354.4_cds_NP_001245600.1_2307	0.472772	0.433828	0.433885
lcl|NC_004354.4_cds_NP_001245601.1_2310	0.470343	0.415913	0.443083
lcl|NC_004354.4_cds_NP_001245602.1_2306	0.452102	0.377243	0.416796
lcl|NC_004354.4_cds_NP_001245603.1_2321	0.454075	0.466715	0.386991
lcl|NC_004354.4_cds_NP_001245604.1_2320	0.460186	0.476228	0.385969
lcl|NC_004354.4_cds_NP_001245605.1_2319	0.447566	0.433092	0.385706
lcl|NC_004354.4_cds_NP_001245606.1_2325	0.461035	0.44682	0.400839
lcl|NC_004354.4_cds_NP_001245607.1_2324	0.473166	0.45952	0.419794
lcl|NC_004354.4_cds_NP_001245608.1_2326	0.464572	0.453822	0.405705
lcl|NC_004354.4_cds_NP_001245609.1_2365	0.49672	0.537766	0.405133
lcl|NC_004354.4_cds_NP_001245610.1_2362	0.48036	0.504264	0.379766
lcl|NC_004354.4_cds_NP_001245611.1_2363	0.49763	0.541379	0.41043
lcl|NC_004354.4_cds_NP_001245612.1_2366	0.496456	0.536129	0.405191
lcl|NC_004354.4_cds_NP_001245614.1_2413	0.474308	0.492718	0.425435
lcl|NC_004354.4_cds_NP_001245615.1_2415	0.525752	0.598614	0.492867
lcl|NC_004354.4_cds_NP_001245616.1_2495	0.480603	0.454959	0.450445
lcl|NC_004354.4_cds_NP_001245617.1_2583	0.492161	0.556592	0.452527
lcl|NC_004354.4_cds_NP_001245618.1_2585	0.50133	0.568694	0.456602
lcl|NC_004354.4_cds_NP_001245621.1_2627	0.491752	0.526312	0.44612
lcl|NC_004354.4_cds_NP_001245622.1_2651	0.482648	0.488659	0.439191
lcl|NC_004354.4_cds_NP_001245623.1_2654	0.483418	0.489529	0.439851
lcl|NC_004354.4_cds_NP_001245624.1_2661	0.443706	0.38974	0.37505
lcl|NC_004354.4_cds_NP_001245625.1_2718	0.451285	0.393734	0.40022
lcl|NC_004354.4_cds_NP_001245626.1_2715	0.453197	0.40238	0.402051
lcl|NC_004354.4_cds_NP_001245627.1_2716	0.450942	0.393371	0.399898
lcl|NC_004354.4_cds_NP_001245628.1_2786	0.467603	0.436992	0.437294
lcl|NC_004354.4_cds_NP_001245629.1_2779	0.472901	0.447935	0.442628
lcl|NC_004354.4_cds_NP_001245630.1_2781	0.455723	0.419124	0.427447
lcl|NC_004354.4_cds_NP_001245631.1_2797	0.484167	0.516293	0.427493
lcl|NC_004354.4_cds_NP_001245632.1_2800	0.494624	0.469431	0.444462
lcl|NC_004354.4_cds_NP_001245633.1_2820	0.497431	0.532129	0.43978
lcl|NC_004354.4_cds_NP_001245634.1_2835	0.360837	0.289738	0.306853
lcl|NC_004354.4_cds_NP_001245635.1_2838	0.504731	0.559019	0.453869
lcl|NC_004354.4_cds_NP_001245636.1_2852	0.437311	0.374468	0.373079
lcl|NC_004354.4_cds_NP_001245637.1_2850	0.441633	0.382425	0.380156
lcl|NC_004354.4_cds_NP_001245638.1_2846	0.439895	0.374955	0.372551
lcl|NC_004354.4_cds_NP_001245639.1_2854	0.439359	0.376439	0.376826
lcl|NC_004354.4_cds_NP_001245640.1_2904	0.493659	0.542522	0.444166
lcl|NC_004354.4_cds_NP_001245641.1_2899	0.493349	0.542065	0.444017
lcl|NC_004354.4_cds_NP_001245642.1_2900	0.493349	0.542065	0.444017
lcl|NC_004354.4_cds_NP_001245643.1_2958	0.449672	0.447711	0.401287
lcl|NC_004354.4_cds_NP_001245644.1_2967	0.447442	0.407715	0.403641
lcl|NC_004354.4_cds_NP_001245645.1_3004	0.456606	0.420852	0.397642
lcl|NC_004354.4_cds_NP_001245646.1_3019	0.482322	0.466589	0.426773
lcl|NC_004354.4_cds_NP_001245647.1_3023	0.483312	0.468468	0.428082
lcl|NC_004354.4_cds_NP_001245648.1_3020	0.482322	0.466589	0.426773
lcl|NC_004354.4_cds_NP_001245649.2_3024	0.483312	0.468468	0.428082
lcl|NC_004354.4_cds_NP_001245651.1_3097	0.456058	0.462774	0.388477
lcl|NC_004354.4_cds_NP_001245652.1_3180	0.640763	0.62272	0.618853
lcl|NC_004354.4_cds_NP_001245653.1_3195	0.637454	0.617122	0.614982
lcl|NC_004354.4_cds_NP_001245654.1_3204	0.49105	0.522908	0.423758
lcl|NC_004354.4_cds_NP_001245655.1_3234	0.4944	0.497081	0.430904
lcl|NC_004354.4_cds_NP_001245656.1_3240	0.488606	0.488588	0.421727
lcl|NC_004354.4_cds_NP_001245657.1_3237	0.495016	0.503532	0.427137
lcl|NC_004354.4_cds_NP_001245659.1_3297	0.494135	0.480297	0.43967
lcl|NC_004354.4_cds_NP_001245660.1_3292	0.509325	0.565493	0.457645
lcl|NC_004354.4_cds_NP_001245661.1_3302	0.446623	0.440633	0.391574
lcl|NC_004354.4_cds_NP_001245662.1_3303	0.446623	0.440633	0.391574
lcl|NC_004354.4_cds_NP_001245663.1_3308	0.522176	0.572007	0.461298
lcl|NC_004354.4_cds_NP_001245664.1_3326	0.512062	0.494779	0.494237
lcl|NC_004354.4_cds_NP_001245665.1_3358	0.467006	0.40724	0.4065
lcl|NC_004354.4_cds_NP_001245666.1_3354	0.469767	0.412882	0.408673
lcl|NC_004354.4_cds_NP_001245667.1_3389	0.470543	0.503716	0.375458
lcl|NC_004354.4_cds_NP_001245668.1_3396	0.486514	0.518482	0.425486
lcl|NC_004354.4_cds_NP_001245669.1_3397	0.486514	0.518482	0.425486
lcl|NC_004354.4_cds_NP_001245670.1_3399	0.417244	0.319341	0.381087
lcl|NC_004354.4_cds_NP_001245671.1_3407	0.497864	0.541302	0.461094
lcl|NC_004354.4_cds_NP_001245672.1_3409	0.48412	0.539631	0.427778
lcl|NC_004354.4_cds_NP_001245673.1_3463	0.527513	0.591909	0.471512
lcl|NC_004354.4_cds_NP_001245674.1_3476	0.467695	0.47706	0.401583
lcl|NC_004354.4_cds_NP_001245675.1_3504	0.465515	0.466136	0.399579
lcl|NC_004354.4_cds_NP_001245676.1_3506	0.469552	0.468219	0.404855
lcl|NC_004354.4_cds_NP_001245677.1_3522	0.420246	0.36749	0.359538
lcl|NC_004354.4_cds_NP_001245678.1_3523	0.419334	0.334868	0.372096
lcl|NC_004354.4_cds_NP_001245679.1_3537	0.529695	0.578277	0.471112
lcl|NC_004354.4_cds_NP_001245680.1_3548	0.498707	0.563186	0.414748
lcl|NC_004354.4_cds_NP_001245681.1_3546	0.49801	0.556895	0.414529
lcl|NC_004354.4_cds_NP_001245682.1_3563	0.445933	0.434952	0.3977
lcl|NC_004354.4_cds_NP_001245683.1_3553	0.451661	0.446706	0.40072
lcl|NC_004354.4_cds_NP_001245684.1_3556	0.450585	0.437168	0.400636
lcl|NC_004354.4_cds_NP_001245685.1_3554	0.450502	0.442654	0.400095
lcl|NC_004354.4_cds_NP_001245686.1_3561	0.449372	0.442855	0.400184
lcl|NC_004354.4_cds_NP_001245687.1_3557	0.446903	0.434521	0.397544
lcl|NC_004354.4_cds_NP_001245688.1_3559	0.447047	0.429527	0.398104
lcl|NC_004354.4_cds_NP_001245689.1_3558	0.44584	0.430845	0.396972
lcl|NC_004354.4_cds_NP_001245690.1_3571	0.466965	0.473364	0.393434
lcl|NC_004354.4_cds_NP_001245691.1_3573	0.46682	0.473374	0.393647
lcl|NC_004354.4_cds_NP_001245694.1_3641	0.514174	0.600568	0.473301
lcl|NC_004354.4_cds_NP_001245695.1_3704	0.475355	0.448245	0.404524
lcl|NC_004354.4_cds_NP_001245696.1_3706	0.457316	0.410451	0.413482
lcl|NC_004354.4_cds_NP_001245697.1_3715	0.457142	0.413846	0.410658
lcl|NC_004354.4_cds_NP_001245698.1_3724	0.45905	0.411864	0.412882
lcl|NC_004354.4_cds_NP_001245699.1_3720	0.457757	0.412004	0.411316
lcl|NC_004354.4_cds_NP_001245700.1_3725	0.45905	0.411864	0.412882
lcl|NC_004354.4_cds_NP_001245701.1_3707	0.457316	0.410451	0.413482
lcl|NC_004354.4_cds_NP_001245702.1_3708	0.457316	0.410451	0.413482
lcl|NC_004354.4_cds_NP_001245703.1_3805	0.390997	0.382637	0.368164
lcl|NC_004354.4_cds_NP_001245704.1_3816	0.471587	0.470973	0.420271
lcl|NC_004354.4_cds_NP_001245705.1_3815	0.473603	0.474076	0.421545
lcl|NC_004354.4_cds_NP_001245706.1_3887	0.418179	0.337916	0.370961
lcl|NC_004354.4_cds_NP_001245707.1_3881	0.404931	0.326306	0.350621
lcl|NC_004354.4_cds_NP_001245708.1_3934	0.476544	0.448584	0.41369
lcl|NC_004354.4_cds_NP_001245709.1_3935	0.479731	0.452325	0.424575
lcl|NC_004354.4_cds_NP_001245710.1_3933	0.47723	0.453494	0.413521
lcl|NC_004354.4_cds_NP_001245711.1_3967	0.489028	0.510838	0.430121
lcl|NC_004354.4_cds_NP_001245712.1_3966	0.489069	0.511816	0.429896
lcl|NC_004354.4_cds_NP_001245713.1_3972	0.503717	0.534688	0.428661
lcl|NC_004354.4_cds_NP_001245714.1_3973	0.503717	0.534688	0.428661
lcl|NC_004354.4_cds_NP_001245715.1_4066	0.532955	0.648482	0.455991
lcl|NC_004354.4_cds_NP_001245716.1_4067	0.532955	0.648482	0.455991
lcl|NC_004354.4_cds_NP_001245717.1_4068	0.520297	0.609555	0.447724
lcl|NC_004354.4_cds_NP_001245718.1_4130	0.490648	0.550315	0.439592
lcl|NC_004354.4_cds_NP_001245719.1_4160	0.477174	0.45804	0.400267
lcl|NC_004354.4_cds_NP_001245720.1_4163	0.526889	0.580621	0.462757
lcl|NC_004354.4_cds_NP_001245721.1_4175	0.48834	0.561642	0.422301
lcl|NC_004354.4_cds_NP_001245722.1_4181	0.483367	0.513471	0.415371
lcl|NC_004354.4_cds_NP_001245723.1_4205	0.491956	0.504154	0.436313
lcl|NC_004354.4_cds_NP_001245724.1_4216	0.421535	0.331188	0.384819
lcl|NC_004354.4_cds_NP_001245725.1_4220	0.482359	0.507054	0.405111
lcl|NC_004354.4_cds_NP_001245726.1_4454	0.384208	0.275284	0.314382
lcl|NC_004354.4_cds_NP_001245727.1_4448	0.417074	0.343857	0.365708
lcl|NC_004354.4_cds_NP_001245728.1_4468	0.451574	0.417595	0.38079
lcl|NC_004354.4_cds_NP_001245729.1_4470	0.579189	0.70333	0.5591
lcl|NC_004354.4_cds_NP_001245730.1_4472	0.492543	0.545738	0.427061
lcl|NC_004354.4_cds_NP_001245731.1_4478	0.492097	0.522564	0.456987
lcl|NC_004354.4_cds_NP_001245732.1_4493	0.572129	0.505358	0.552079
lcl|NC_004354.4_cds_NP_001245733.1_4491	0.574486	0.536278	0.557433
lcl|NC_004354.4_cds_NP_001245734.1_4492	0.585489	0.5386	0.567496
lcl|NC_004354.4_cds_NP_001245735.1_4494	0.423719	0.390976	0.382681
lcl|NC_004354.4_cds_NP_001245736.1_4497	0.515332	0.561041	0.460667
lcl|NC_004354.4_cds_NP_001245737.1_4502	0.442733	0.467379	0.328726
lcl|NC_004354.4_cds_NP_001245738.1_4501	0.43321	0.399131	0.338643
lcl|NC_004354.4_cds_NP_001245739.1_4528	0.490921	0.521704	0.393678
lcl|NC_004354.4_cds_NP_001245740.1_4539	0.463256	0.5045	0.416437
lcl|NC_004354.4_cds_NP_001245742.1_4627	0.531399	0.581668	0.460757
lcl|NC_004354.4_cds_NP_001245743.1_4626	0.483682	0.494829	0.433287
lcl|NC_004354.4_cds_NP_001245744.1_4700	0.401992	0.415959	0.241071
lcl|NC_004354.4_cds_NP_001245746.1_4740	0.502532	0.570075	0.428144
lcl|NC_004354.4_cds_NP_001245748.1_4767	0.491913	0.486614	0.437922
lcl|NC_004354.4_cds_NP_001245749.1_4768	0.491856	0.486435	0.437865
lcl|NC_004354.4_cds_NP_001245750.1_4762	0.545229	0.652892	0.490546
lcl|NC_004354.4_cds_NP_001245751.1_4763	0.545229	0.652892	0.490546
lcl|NC_004354.4_cds_NP_001245752.1_4764	0.545229	0.652892	0.490546
lcl|NC_004354.4_cds_NP_001245753.1_4773	0.51432	0.533713	0.442216
lcl|NC_004354.4_cds_NP_001245754.1_4774	0.51432	0.533713	0.442216
lcl|NC_004354.4_cds_NP_001245755.1_4781	0.49473	0.47488	0.449477
lcl|NC_004354.4_cds_NP_001245756.1_4803	0.476409	0.512654	0.412996
lcl|NC_004354.4_cds_NP_001245757.1_4805	0.474687	0.413487	0.392598
lcl|NC_004354.4_cds_NP_001245758.1_4812	0.568264	0.729271	0.559505
lcl|NC_004354.4_cds_NP_001245759.1_4815	0.597978	0.68004	0.552698
lcl|NC_004354.4_cds_NP_001245760.1_4819	0.510985	0.554032	0.477305
lcl|NC_004354.4_cds_NP_001245761.1_4871	0.494607	0.517496	0.432313
lcl|NC_004354.4_cds_NP_001245762.1_4882	0.553623	0.630903	0.514413
lcl|NC_004354.4_cds_NP_001245763.1_4883	0.553623	0.630903	0.514413
lcl|NC_004354.4_cds_NP_001245765.1_4885	0.505854	0.562781	0.408812
lcl|NC_004354.4_cds_NP_001245766.1_4887	0.55755	0.64387	0.463189
lcl|NC_004354.4_cds_NP_001245767.1_4902	0.621557	0.847727	0.575153
lcl|NC_004354.4_cds_NP_001245768.1_4923	0.483204	0.546239	0.429927
lcl|NC_004354.4_cds_NP_001245769.1_4922	0.483325	0.545954	0.428516
lcl|NC_004354.4_cds_NP_001245770.1_4937	0.474613	0.515733	0.417212
lcl|NC_004354.4_cds_NP_001245771.1_4939	0.488897	0.492064	0.424634
lcl|NC_004354.4_cds_NP_001245772.1_4943	0.471437	0.478884	0.418266
lcl|NC_004354.4_cds_NP_001245773.1_4944	0.471437	0.478884	0.418266
lcl|NC_004354.4_cds_NP_001245774.1_4946	0.476502	0.474694	0.417623
lcl|NC_004354.4_cds_NP_001245775.1_4959	0.521573	0.565612	0.454469
lcl|NC_004354.4_cds_NP_001245776.1_4960	0.521573	0.565612	0.454469
lcl|NC_004354.4_cds_NP_001245777.1_4996	0.509385	0.563614	0.468103
lcl|NC_004354.4_cds_NP_001245778.1_5023	0.584784	0.76429	0.570004
lcl|NC_004354.4_cds_NP_001245779.1_5026	0.559547	0.745863	0.527096
lcl|NC_004354.4_cds_NP_001245780.1_5074	0.458992	0.481151	0.39846
lcl|NC_004354.4_cds_NP_001245781.1_5097	0.484946	0.406483	0.451871
lcl|NC_004354.4_cds_NP_001245782.1_5093	0.485306	0.406545	0.452206
lcl|NC_004354.4_cds_NP_001245783.1_5094	0.484946	0.406483	0.451871
lcl|NC_004354.4_cds_NP_001245784.1_5096	0.484946	0.406483	0.451871
lcl|NC_004354.4_cds_NP_001245785.1_5098	0.484946	0.406483	0.451871
lcl|NC_004354.4_cds_NP_001245786.1_5102	0.497746	0.59489	0.444935
lcl|NC_004354.4_cds_NP_001245787.1_5107	0.405228	0.300252	0.364824
lcl|NC_004354.4_cds_NP_001245788.1_5108	0.405228	0.300252	0.364824
lcl|NC_004354.4_cds_NP_001245790.1_5156	0.467378	0.419151	0.397895
lcl|NC_004354.4_cds_NP_001245791.1_5231	0.537826	0.581392	0.485962
lcl|NC_004354.4_cds_NP_001245792.1_5223	0.532506	0.561448	0.47597
lcl|NC_004354.4_cds_NP_001245793.1_5224	0.532506	0.561448	0.47597
lcl|NC_004354.4_cds_NP_001245794.1_5225	0.532506	0.561448	0.47597
lcl|NC_004354.4_cds_NP_001245795.1_5232	0.537826	0.581392	0.485962
lcl|NC_004354.4_cds_NP_001245796.1_5221	0.530537	0.559961	0.469732
lcl|NC_004354.4_cds_NP_001245797.1_5282	0.469269	0.467113	0.382055
lcl|NC_004354.4_cds_NP_001245798.1_5283	0.469269	0.467113	0.382055
lcl|NC_004354.4_cds_NP_001245799.1_5291	0.447957	0.435772	0.377695
lcl|NC_004354.4_cds_NP_001245800.1_5292	0.447957	0.435772	0.377695
lcl|NC_004354.4_cds_NP_001259088.1_21	0.436385	0.362752	0.379685
lcl|NC_004354.4_cds_NP_001259089.1_28	0.443544	0.383937	0.389355
lcl|NC_004354.4_cds_NP_001259090.1_31	0.462633	0.45162	0.384392
lcl|NC_004354.4_cds_NP_001259091.1_30	0.457012	0.439478	0.371338
lcl|NC_004354.4_cds_NP_001259092.1_38	0.438463	0.409742	0.374941
lcl|NC_004354.4_cds_NP_001259093.1_37	0.438711	0.40817	0.373727
lcl|NC_004354.4_cds_NP_001259094.1_44	0.437696	0.381927	0.389933
lcl|NC_004354.4_cds_NP_001259095.1_77	0.500293	0.564876	0.435741
lcl|NC_004354.4_cds_NP_001259096.1_80	0.495997	0.56838	0.423442
lcl|NC_004354.4_cds_NP_001259097.1_81	0.495997	0.56838	0.423442
lcl|NC_004354.4_cds_NP_001259099.1_104	0.491965	0.504777	0.414691
lcl|NC_004354.4_cds_NP_001259100.1_130	0.544207	0.564455	0.49642
lcl|NC_004354.4_cds_NP_001259101.1_127	0.542382	0.557822	0.495579
lcl|NC_004354.4_cds_NP_001259102.1_185	0.474282	0.492599	0.419982
lcl|NC_004354.4_cds_NP_001259103.1_192	0.53003	0.556367	0.491351
lcl|NC_004354.4_cds_NP_001259104.1_197	0.459994	0.458567	0.391183
lcl|NC_004354.4_cds_NP_001259105.1_201	0.464756	0.464578	0.393233
lcl|NC_004354.4_cds_NP_001259106.1_199	0.46278	0.46669	0.39646
lcl|NC_004354.4_cds_NP_001259107.2_195	0.463019	0.460494	0.39277
lcl|NC_004354.4_cds_NP_001259108.1_194	0.463019	0.460494	0.39277
lcl|NC_004354.4_cds_NP_001259109.1_196	0.461775	0.459982	0.392619
lcl|NC_004354.4_cds_NP_001259110.1_206	0.470558	0.473156	0.413208
lcl|NC_004354.4_cds_NP_001259113.1_210	0.460114	0.494234	0.400508
lcl|NC_004354.4_cds_NP_001259114.1_211	0.479615	0.490013	0.408511
lcl|NC_004354.4_cds_NP_001259115.1_222	0.557317	0.715617	0.509041
lcl|NC_004354.4_cds_NP_001259116.1_242	0.498219	0.506801	0.413575
lcl|NC_004354.4_cds_NP_001259118.1_249	0.518868	0.585274	0.450644
lcl|NC_004354.4_cds_NP_001259119.1_252	0.52123	0.591338	0.453747
lcl|NC_004354.4_cds_NP_001259120.1_256	0.50978	0.535889	0.467503
lcl|NC_004354.4_cds_NP_001259121.1_262	0.465335	0.491242	0.414263
lcl|NC_004354.4_cds_NP_001259122.2_272	0.4411	0.444681	0.366783
lcl|NC_004354.4_cds_NP_001259124.1_277	0.466457	0.497863	0.378641
lcl|NC_004354.4_cds_NP_001259125.1_282	0.49031	0.555343	0.438912
lcl|NC_004354.4_cds_NP_001259126.1_289	0.514303	0.528493	0.445191
lcl|NC_004354.4_cds_NP_001259128.1_298	0.489538	0.495866	0.390767
lcl|NC_004354.4_cds_NP_001259129.1_300	0.487297	0.523717	0.39639
lcl|NC_004354.4_cds_NP_001259131.1_304	0.504891	0.559999	0.439446
lcl|NC_004354.4_cds_NP_001259132.1_328	0.554182	0.631844	0.440452
lcl|NC_004354.4_cds_NP_001259133.1_327	0.539681	0.607812	0.434287
lcl|NC_004354.4_cds_NP_001259134.1_385	0.482876	0.561179	0.43142
lcl|NC_004354.4_cds_NP_001259135.1_394	0.477581	0.496016	0.431692
lcl|NC_004354.4_cds_NP_001259136.1_395	0.503972	0.522787	0.434143
lcl|NC_004354.4_cds_NP_001259137.1_399	0.50092	0.52061	0.435148
lcl|NC_004354.4_cds_NP_001259138.1_403	0.510139	0.535508	0.437775
lcl|NC_004354.4_cds_NP_001259139.1_398	0.503038	0.522887	0.436145
lcl|NC_004354.4_cds_NP_001259140.1_397	0.503567	0.523955	0.435848
lcl|NC_004354.4_cds_NP_001259141.1_411	0.467416	0.484739	0.387014
lcl|NC_004354.4_cds_NP_001259142.1_412	0.467416	0.484739	0.387014
lcl|NC_004354.4_cds_NP_001259143.1_447	0.48244	0.536097	0.41293
lcl|NC_004354.4_cds_NP_001259144.1_449	0.519499	0.51884	0.471601
lcl|NC_004354.4_cds_NP_001259146.1_468	0.53241	0.545633	0.459098
lcl|NC_004354.4_cds_NP_001259147.1_470	0.464192	0.473426	0.37799
lcl|NC_004354.4_cds_NP_001259148.1_474	0.553515	0.623396	0.516532
lcl|NC_004354.4_cds_NP_001259149.1_478	0.497813	0.501925	0.448154
lcl|NC_004354.4_cds_NP_001259150.1_483	0.444067	0.413665	0.382158
lcl|NC_004354.4_cds_NP_001259151.1_481	0.451486	0.422697	0.396339
lcl|NC_004354.4_cds_NP_001259152.1_485	0.480694	0.447798	0.400522
lcl|NC_004354.4_cds_NP_001259153.1_496	0.532302	0.586251	0.451373
lcl|NC_004354.4_cds_NP_001259154.1_500	0.487092	0.473929	0.389978
lcl|NC_004354.4_cds_NP_001259155.1_501	0.487092	0.473929	0.389978
lcl|NC_004354.4_cds_NP_001259156.1_504	0.462078	0.49685	0.391192
lcl|NC_004354.4_cds_NP_001259157.1_509	0.458762	0.485368	0.38588
lcl|NC_004354.4_cds_NP_001259158.1_508	0.467531	0.513024	0.394853
lcl|NC_004354.4_cds_NP_001259159.1_505	0.462984	0.504681	0.386213
lcl|NC_004354.4_cds_NP_001259160.1_511	0.456507	0.480168	0.386905
lcl|NC_004354.4_cds_NP_001259161.1_510	0.450163	0.451478	0.38599
lcl|NC_004354.4_cds_NP_001259162.1_506	0.467302	0.512557	0.394655
lcl|NC_004354.4_cds_NP_001259163.1_507	0.467302	0.512557	0.394655
lcl|NC_004354.4_cds_NP_001259164.1_521	0.58362	0.684822	0.549642
lcl|NC_004354.4_cds_NP_001259165.1_526	0.580574	0.677759	0.551117
lcl|NC_004354.4_cds_NP_001259166.1_527	0.580574	0.677759	0.551117
lcl|NC_004354.4_cds_NP_001259167.1_528	0.580574	0.677759	0.551117
lcl|NC_004354.4_cds_NP_001259168.1_530	0.521689	0.585571	0.455519
lcl|NC_004354.4_cds_NP_001259169.1_532	0.451407	0.463892	0.38789
lcl|NC_004354.4_cds_NP_001259170.1_535	0.464931	0.48112	0.390515
lcl|NC_004354.4_cds_NP_001259171.1_536	0.464931	0.48112	0.390515
lcl|NC_004354.4_cds_NP_001259172.1_560	0.556368	0.628257	0.515346
lcl|NC_004354.4_cds_NP_001259173.1_561	0.569189	0.655351	0.535116
lcl|NC_004354.4_cds_NP_001259174.1_563	0.498129	0.532865	0.425574
lcl|NC_004354.4_cds_NP_001259175.1_576	0.567511	0.659223	0.543124
lcl|NC_004354.4_cds_NP_001259176.1_586	0.498277	0.467446	0.456762
lcl|NC_004354.4_cds_NP_001259177.1_584	0.498248	0.473862	0.458079
lcl|NC_004354.4_cds_NP_001259178.1_585	0.498248	0.473862	0.458079
lcl|NC_004354.4_cds_NP_001259179.1_590	0.497888	0.47072	0.456384
lcl|NC_004354.4_cds_NP_001259180.1_603	0.432118	0.380045	0.389132
lcl|NC_004354.4_cds_NP_001259181.1_614	0.457151	0.554606	0.41351
lcl|NC_004354.4_cds_NP_001259182.1_616	0.454537	0.435874	0.395105
lcl|NC_004354.4_cds_NP_001259183.2_615	0.454605	0.436094	0.395203
lcl|NC_004354.4_cds_NP_001259184.1_643	0.495119	0.552217	0.439479
lcl|NC_004354.4_cds_NP_001259185.1_650	0.44923	0.470516	0.405011
lcl|NC_004354.4_cds_NP_001259186.1_654	0.499358	0.506568	0.416783
lcl|NC_004354.4_cds_NP_001259187.1_664	0.475438	0.48693	0.404542
lcl|NC_004354.4_cds_NP_001259188.1_663	0.474423	0.486765	0.400621
lcl|NC_004354.4_cds_NP_001259189.1_665	0.473642	0.493345	0.397033
lcl|NC_004354.4_cds_NP_001259190.1_679	0.500016	0.509365	0.454007
lcl|NC_004354.4_cds_NP_001259191.1_731	0.499688	0.55568	0.442097
lcl|NC_004354.4_cds_NP_001259192.1_744	0.474571	0.473028	0.43942
lcl|NC_004354.4_cds_NP_001259193.1_743	0.473635	0.476148	0.434653
lcl|NC_004354.4_cds_NP_001259194.1_753	0.507162	0.557818	0.427691
lcl|NC_004354.4_cds_NP_001259195.1_780	0.499125	0.479665	0.456075
lcl|NC_004354.4_cds_NP_001259196.1_821	0.476677	0.477684	0.43914
lcl|NC_004354.4_cds_NP_001259197.1_791	0.549229	0.588343	0.509989
lcl|NC_004354.4_cds_NP_001259198.1_796	0.484687	0.529634	0.429919
lcl|NC_004354.4_cds_NP_001259199.1_810	0.499889	0.486846	0.438462
lcl|NC_004354.4_cds_NP_001259200.1_814	0.481056	0.488294	0.423378
lcl|NC_004354.4_cds_NP_001259201.1_851	0.466408	0.449412	0.433943
lcl|NC_004354.4_cds_NP_001259202.1_844	0.46288	0.446531	0.43067
lcl|NC_004354.4_cds_NP_001259203.1_837	0.464971	0.448149	0.42896
lcl|NC_004354.4_cds_NP_001259204.1_855	0.484229	0.500679	0.444905
lcl|NC_004354.4_cds_NP_001259205.1_857	0.444122	0.440125	0.403001
lcl|NC_004354.4_cds_NP_001259206.1_859	0.444122	0.440125	0.403001
lcl|NC_004354.4_cds_NP_001259207.1_862	0.467029	0.416589	0.429528
lcl|NC_004354.4_cds_NP_001259210.1_865	0.442519	0.372949	0.40969
lcl|NC_004354.4_cds_NP_001259211.1_867	0.438363	0.428365	0.392599
lcl|NC_004354.4_cds_NP_001259212.1_876	0.493012	0.488391	0.461861
lcl|NC_004354.4_cds_NP_001259213.1_880	0.451756	0.401026	0.415246
lcl|NC_004354.4_cds_NP_001259214.1_881	0.451756	0.401026	0.415246
lcl|NC_004354.4_cds_NP_001259215.1_882	0.451756	0.401026	0.415246
lcl|NC_004354.4_cds_NP_001259216.1_879	0.455675	0.406638	0.416581
lcl|NC_004354.4_cds_NP_001259217.1_888	0.471308	0.465917	0.426998
lcl|NC_004354.4_cds_NP_001259218.1_887	0.470189	0.470614	0.416366
lcl|NC_004354.4_cds_NP_001259219.1_894	0.465849	0.427823	0.430573
lcl|NC_004354.4_cds_NP_001259220.1_919	0.471509	0.485971	0.409176
lcl|NC_004354.4_cds_NP_001259221.1_917	0.46015	0.469095	0.399128
lcl|NC_004354.4_cds_NP_001259222.1_924	0.472096	0.48787	0.410858
lcl|NC_004354.4_cds_NP_001259224.1_948	0.481422	0.527796	0.404299
lcl|NC_004354.4_cds_NP_001259225.1_949	0.482672	0.528064	0.404886
lcl|NC_004354.4_cds_NP_001259226.1_953	0.467931	0.476056	0.406603
lcl|NC_004354.4_cds_NP_001259227.1_974	0.448121	0.449493	0.394291
lcl|NC_004354.4_cds_NP_001259228.1_972	0.444451	0.447674	0.388883
lcl|NC_004354.4_cds_NP_001259229.1_970	0.446725	0.4561	0.389883
lcl|NC_004354.4_cds_NP_001259230.1_968	0.445107	0.454624	0.386756
lcl|NC_004354.4_cds_NP_001259231.1_987	0.47903	0.456608	0.377567
lcl|NC_004354.4_cds_NP_001259232.1_988	0.47903	0.456608	0.377567
lcl|NC_004354.4_cds_NP_001259233.1_991	0.478123	0.474849	0.417552
lcl|NC_004354.4_cds_NP_001259234.1_990	0.486613	0.491293	0.422927
lcl|NC_004354.4_cds_NP_001259235.1_1004	0.507507	0.519117	0.46439
lcl|NC_004354.4_cds_NP_001259237.1_1007	0.507628	0.518664	0.464532
lcl|NC_004354.4_cds_NP_001259238.1_1043	0.45039	0.462086	0.405921
lcl|NC_004354.4_cds_NP_001259239.1_1053	0.475192	0.479545	0.424346
lcl|NC_004354.4_cds_NP_001259240.1_1070	0.441758	0.379324	0.377871
lcl|NC_004354.4_cds_NP_001259243.1_1078	0.450858	0.429731	0.340981
lcl|NC_004354.4_cds_NP_001259245.1_1115	0.413143	0.304367	0.368225
lcl|NC_004354.4_cds_NP_001259246.1_1114	0.412972	0.303975	0.366812
lcl|NC_004354.4_cds_NP_001259247.1_1132	0.455543	0.450567	0.418907
lcl|NC_004354.4_cds_NP_001259248.1_1133	0.455543	0.450567	0.418907
lcl|NC_004354.4_cds_NP_001259249.1_1154	0.456269	0.499377	0.412356
lcl|NC_004354.4_cds_NP_001259250.1_1158	0.456276	0.499365	0.412312
lcl|NC_004354.4_cds_NP_001259251.1_1203	0.431444	0.374786	0.36439
lcl|NC_004354.4_cds_NP_001259252.1_1202	0.428325	0.371999	0.362483
lcl|NC_004354.4_cds_NP_001259253.1_1197	0.42937	0.375856	0.36059
lcl|NC_004354.4_cds_NP_001259254.1_1249	0.499547	0.562895	0.442699
lcl|NC_004354.4_cds_NP_001259255.1_1248	0.499495	0.562773	0.439995
lcl|NC_004354.4_cds_NP_001259256.1_1251	0.500997	0.56251	0.441509
lcl|NC_004354.4_cds_NP_001259257.1_1246	0.503021	0.570223	0.445468
lcl|NC_004354.4_cds_NP_001259258.1_1283	0.506863	0.551688	0.449362
lcl|NC_004354.4_cds_NP_001259259.1_1288	0.467232	0.483125	0.401368
lcl|NC_004354.4_cds_NP_001259260.1_1289	0.467232	0.483125	0.401368
lcl|NC_004354.4_cds_NP_001259261.1_1290	0.467232	0.483125	0.401368
lcl|NC_004354.4_cds_NP_001259262.1_1292	0.49186	0.497679	0.420776
lcl|NC_004354.4_cds_NP_001259263.1_1316	0.456799	0.389693	0.429191
lcl|NC_004354.4_cds_NP_001259264.1_1335	0.503365	0.561526	0.427121
lcl|NC_004354.4_cds_NP_001259265.1_1367	0.45481	0.456851	0.351023
lcl|NC_004354.4_cds_NP_001259266.1_1372	0.494847	0.567615	0.416171
lcl|NC_004354.4_cds_NP_001259267.1_1389	0.482036	0.500239	0.406467
lcl|NC_004354.4_cds_NP_001259269.1_1440	0.448734	0.434868	0.372964
lcl|NC_004354.4_cds_NP_001259270.1_1444	0.492918	0.538158	0.401603
lcl|NC_004354.4_cds_NP_001259271.1_1445	0.492918	0.538158	0.401603
lcl|NC_004354.4_cds_NP_001259272.1_1458	0.538712	0.623199	0.488055
lcl|NC_004354.4_cds_NP_001259273.1_1459	0.538712	0.623199	0.488055
lcl|NC_004354.4_cds_NP_001259274.1_1460	0.538712	0.623199	0.488055
lcl|NC_004354.4_cds_NP_001259275.1_1466	0.47171	0.474826	0.400839
lcl|NC_004354.4_cds_NP_001259276.1_1493	0.482663	0.484411	0.434135
lcl|NC_004354.4_cds_NP_001259277.1_1495	0.483441	0.488715	0.437528
lcl|NC_004354.4_cds_NP_001259278.1_1496	0.480409	0.4675	0.442115
lcl|NC_004354.4_cds_NP_001259279.1_1490	0.475276	0.442246	0.432315
lcl|NC_004354.4_cds_NP_001259280.1_1481	0.46557	0.427863	0.422516
lcl|NC_004354.4_cds_NP_001259281.1_1482	0.477472	0.443911	0.435655
lcl|NC_004354.4_cds_NP_001259282.1_1480	0.46607	0.428857	0.423071
lcl|NC_004354.4_cds_NP_001259283.1_1488	0.466004	0.428705	0.422702
lcl|NC_004354.4_cds_NP_001259284.1_1484	0.47506	0.441674	0.432508
lcl|NC_004354.4_cds_NP_001259285.1_1504	0.474219	0.471904	0.417012
lcl|NC_004354.4_cds_NP_001259286.1_1503	0.474736	0.472442	0.4175
lcl|NC_004354.4_cds_NP_001259287.1_1544	0.449402	0.450488	0.34395
lcl|NC_004354.4_cds_NP_001259288.1_1546	0.481741	0.500171	0.427195
lcl|NC_004354.4_cds_NP_001259289.1_1547	0.481741	0.500171	0.427195
lcl|NC_004354.4_cds_NP_001259290.1_1548	0.481741	0.500171	0.427195
lcl|NC_004354.4_cds_NP_001259291.1_1573	0.486364	0.521422	0.425811
lcl|NC_004354.4_cds_NP_001259292.1_1580	0.491614	0.532744	0.43344
lcl|NC_004354.4_cds_NP_001259293.1_1575	0.48351	0.519449	0.424102
lcl|NC_004354.4_cds_NP_001259294.1_1609	0.488559	0.520976	0.442419
lcl|NC_004354.4_cds_NP_001259295.1_1612	0.493692	0.534405	0.447333
lcl|NC_004354.4_cds_NP_001259296.1_1605	0.449498	0.448164	0.399385
lcl|NC_004354.4_cds_NP_001259297.1_1614	0.413238	0.380275	0.355111
lcl|NC_004354.4_cds_NP_001259298.1_1606	0.457052	0.463466	0.400258
lcl|NC_004354.4_cds_NP_001259299.1_1625	0.534413	0.640941	0.489723
lcl|NC_004354.4_cds_NP_001259300.1_1626	0.534413	0.640941	0.489723
lcl|NC_004354.4_cds_NP_001259301.1_1632	0.534769	0.658438	0.496573
lcl|NC_004354.4_cds_NP_001259302.1_1634	0.507676	0.568362	0.452662
lcl|NC_004354.4_cds_NP_001259303.1_1649	0.445972	0.429278	0.393836
lcl|NC_004354.4_cds_NP_001259304.1_1650	0.44553	0.431638	0.392632
lcl|NC_004354.4_cds_NP_001259305.1_1668	0.431018	0.4154	0.404424
lcl|NC_004354.4_cds_NP_001259306.1_1671	0.407912	0.39287	0.381081
lcl|NC_004354.4_cds_NP_001259308.1_1676	0.483752	0.490918	0.415362
lcl|NC_004354.4_cds_NP_001259309.1_1700	0.451823	0.431109	0.389243
lcl|NC_004354.4_cds_NP_001259310.1_1729	0.472726	0.461055	0.424803
lcl|NC_004354.4_cds_NP_001259311.1_1733	0.433149	0.428944	0.389785
lcl|NC_004354.4_cds_NP_001259312.1_1731	0.433415	0.429336	0.390071
lcl|NC_004354.4_cds_NP_001259313.1_1745	0.510105	0.571928	0.469471
lcl|NC_004354.4_cds_NP_001259314.1_1749	0.428278	0.374973	0.397033
lcl|NC_004354.4_cds_NP_001259315.1_1750	0.426257	0.373894	0.395025
lcl|NC_004354.4_cds_NP_001259316.1_1795	0.513158	0.541739	0.401629
lcl|NC_004354.4_cds_NP_001259317.1_1800	0.472313	0.474327	0.415122
lcl|NC_004354.4_cds_NP_001259318.1_1802	0.471857	0.473428	0.414428
lcl|NC_004354.4_cds_NP_001259321.1_1819	0.478269	0.47468	0.416271
lcl|NC_004354.4_cds_NP_001259322.1_1820	0.478883	0.469872	0.410109
lcl|NC_004354.4_cds_NP_001259323.1_1826	0.479307	0.469601	0.410923
lcl|NC_004354.4_cds_NP_001259324.1_1863	0.495003	0.544612	0.418558
lcl|NC_004354.4_cds_NP_001259325.1_1872	0.448471	0.445318	0.371938
lcl|NC_004354.4_cds_NP_001259326.1_1880	0.455924	0.470075	0.408272
lcl|NC_004354.4_cds_NP_001259327.1_1889	0.470078	0.483174	0.42673
lcl|NC_004354.4_cds_NP_001259329.1_1922	0.461078	0.407894	0.409985
lcl|NC_004354.4_cds_NP_001259330.1_1921	0.460943	0.407873	0.409832
lcl|NC_004354.4_cds_NP_001259332.1_1953	0.470243	0.445189	0.409688
lcl|NC_004354.4_cds_NP_001259333.1_1954	0.470243	0.445189	0.409688
lcl|NC_004354.4_cds_NP_001259334.1_1961	0.46542	0.466137	0.422006
lcl|NC_004354.4_cds_NP_001259335.1_1962	0.469566	0.471992	0.42573
lcl|NC_004354.4_cds_NP_001259336.1_1972	0.509577	0.536953	0.46521
lcl|NC_004354.4_cds_NP_001259337.1_1968	0.504468	0.531132	0.461675
lcl|NC_004354.4_cds_NP_001259338.1_1976	0.444675	0.388773	0.384172
lcl|NC_004354.4_cds_NP_001259340.1_1981	0.47017	0.507551	0.412547
lcl|NC_004354.4_cds_NP_001259341.1_1986	0.542638	0.60272	0.430566
lcl|NC_004354.4_cds_NP_001259342.1_1990	0.493651	0.551689	0.411283
lcl|NC_004354.4_cds_NP_001259343.1_1998	0.489113	0.555109	0.40811
lcl|NC_004354.4_cds_NP_001259344.1_1999	0.491161	0.511477	0.470813
lcl|NC_004354.4_cds_NP_001259345.1_2007	0.463655	0.515076	0.425498
lcl|NC_004354.4_cds_NP_001259346.1_2008	0.463655	0.515076	0.425498
lcl|NC_004354.4_cds_NP_001259347.1_2005	0.462971	0.515135	0.424844
lcl|NC_004354.4_cds_NP_001259348.1_2011	0.465075	0.479376	0.423349
lcl|NC_004354.4_cds_NP_001259349.1_2013	0.509834	0.568529	0.47365
lcl|NC_004354.4_cds_NP_001259350.1_2014	0.509834	0.568529	0.47365
lcl|NC_004354.4_cds_NP_001259351.1_2015	0.509834	0.568529	0.47365
lcl|NC_004354.4_cds_NP_001259352.1_2021	0.482668	0.530291	0.397811
lcl|NC_004354.4_cds_NP_001259353.1_2024	0.542604	0.626998	0.485712
lcl|NC_004354.4_cds_NP_001259354.1_2025	0.542604	0.626998	0.485712
lcl|NC_004354.4_cds_NP_001259355.1_2026	0.542604	0.626998	0.485712
lcl|NC_004354.4_cds_NP_001259357.1_2027	0.542604	0.626998	0.485712
lcl|NC_004354.4_cds_NP_001259358.1_2033	0.473473	0.491811	0.396571
lcl|NC_004354.4_cds_NP_001259359.1_2038	0.482907	0.491675	0.39099
lcl|NC_004354.4_cds_NP_001259360.1_2035	0.483275	0.491445	0.392028
lcl|NC_004354.4_cds_NP_001259361.1_2047	0.588122	0.63532	0.551174
lcl|NC_004354.4_cds_NP_001259362.1_2053	0.467997	0.480537	0.384444
lcl|NC_004354.4_cds_NP_001259363.1_2058	0.525752	0.575804	0.503012
lcl|NC_004354.4_cds_NP_001259364.1_2059	0.525752	0.575804	0.503012
lcl|NC_004354.4_cds_NP_001259365.1_2060	0.525752	0.575804	0.503012
lcl|NC_004354.4_cds_NP_001259366.1_2072	0.497942	0.518147	0.440509
lcl|NC_004354.4_cds_NP_001259367.1_2070	0.497745	0.51752	0.440281
lcl|NC_004354.4_cds_NP_001259368.1_2065	0.457504	0.454319	0.387605
lcl|NC_004354.4_cds_NP_001259370.1_2111	0.530713	0.555218	0.461162
lcl|NC_004354.4_cds_NP_001259371.1_2120	0.492794	0.525076	0.428855
lcl|NC_004354.4_cds_NP_001259372.1_2123	0.44461	0.451474	0.367632
lcl|NC_004354.4_cds_NP_001259374.1_2130	0.574009	0.591314	0.564923
lcl|NC_004354.4_cds_NP_001259375.1_2132	0.503868	0.557702	0.490306
lcl|NC_004354.4_cds_NP_001259376.1_2142	0.483127	0.540935	0.440683
lcl|NC_004354.4_cds_NP_001259377.1_2139	0.480829	0.53562	0.436172
lcl|NC_004354.4_cds_NP_001259378.1_2143	0.483127	0.540935	0.440683
lcl|NC_004354.4_cds_NP_001259379.1_2146	0.541373	0.661406	0.527742
lcl|NC_004354.4_cds_NP_001259381.1_2192	0.494891	0.513402	0.437912
lcl|NC_004354.4_cds_NP_001259382.1_2194	0.471447	0.498352	0.411868
lcl|NC_004354.4_cds_NP_001259384.1_2223	0.528178	0.618054	0.465092
lcl|NC_004354.4_cds_NP_001259385.1_2231	0.504417	0.528549	0.463622
lcl|NC_004354.4_cds_NP_001259386.1_2240	0.476445	0.472427	0.437623
lcl|NC_004354.4_cds_NP_001259387.1_2244	0.485911	0.500302	0.441351
lcl|NC_004354.4_cds_NP_001259388.1_2249	0.465164	0.529935	0.412137
lcl|NC_004354.4_cds_NP_001259389.1_2257	0.583999	0.678464	0.558742
lcl|NC_004354.4_cds_NP_001259390.1_2261	0.479667	0.524547	0.430615
lcl|NC_004354.4_cds_NP_001259391.1_2283	0.461452	0.437134	0.427507
lcl|NC_004354.4_cds_NP_001259392.1_2289	0.429875	0.377354	0.404698
lcl|NC_004354.4_cds_NP_001259393.1_2334	0.425694	0.393302	0.322955
lcl|NC_004354.4_cds_NP_001259394.1_2338	0.511615	0.58754	0.460797
lcl|NC_004354.4_cds_NP_001259395.1_2339	0.511615	0.58754	0.460797
lcl|NC_004354.4_cds_NP_001259396.1_2340	0.511615	0.58754	0.460797
lcl|NC_004354.4_cds_NP_001259397.1_2342	0.581617	0.691603	0.575509
lcl|NC_004354.4_cds_NP_001259398.1_2346	0.503346	0.644187	0.488186
lcl|NC_004354.4_cds_NP_001259399.1_2368	0.488531	0.507495	0.416121
lcl|NC_004354.4_cds_NP_001259400.1_2361	0.492866	0.517677	0.42017
lcl|NC_004354.4_cds_NP_001259401.1_2360	0.469655	0.476408	0.395602
lcl|NC_004354.4_cds_NP_001259402.1_2378	0.494883	0.482893	0.448214
lcl|NC_004354.4_cds_NP_001259403.1_2382	0.506335	0.54967	0.480708
lcl|NC_004354.4_cds_NP_001259404.1_2385	0.457988	0.47322	0.41161
lcl|NC_004354.4_cds_NP_001259405.1_2383	0.467123	0.46624	0.408176
lcl|NC_004354.4_cds_NP_001259406.1_2397	0.533052	0.631241	0.453012
lcl|NC_004354.4_cds_NP_001259407.1_2402	0.52983	0.580494	0.473462
lcl|NC_004354.4_cds_NP_001259408.1_2409	0.623756	0.715017	0.612233
lcl|NC_004354.4_cds_NP_001259409.1_2410	0.474182	0.492322	0.425302
lcl|NC_004354.4_cds_NP_001259410.1_2420	0.53331	0.473286	0.48682
lcl|NC_004354.4_cds_NP_001259412.1_2422	0.510853	0.58982	0.474748
lcl|NC_004354.4_cds_NP_001259413.1_2430	0.467185	0.47541	0.410343
lcl|NC_004354.4_cds_NP_001259414.1_2431	0.467185	0.47541	0.410343
lcl|NC_004354.4_cds_NP_001259415.1_2423	0.461013	0.458385	0.401409
lcl|NC_004354.4_cds_NP_001259416.1_2424	0.461013	0.458385	0.401409
lcl|NC_004354.4_cds_NP_001259417.1_2427	0.469361	0.474024	0.41038
lcl|NC_004354.4_cds_NP_001259418.1_2426	0.459944	0.459904	0.402581
lcl|NC_004354.4_cds_NP_001259419.1_2435	0.489328	0.506823	0.424927
lcl|NC_004354.4_cds_NP_001259420.1_2433	0.481991	0.488703	0.405777
lcl|NC_004354.4_cds_NP_001259421.1_2428	0.469361	0.474024	0.41038
lcl|NC_004354.4_cds_NP_001259422.1_2437	0.462136	0.382741	0.40752
lcl|NC_004354.4_cds_NP_001259423.1_2442	0.512314	0.556481	0.483676
lcl|NC_004354.4_cds_NP_001259424.1_2444	0.495275	0.557214	0.442385
lcl|NC_004354.4_cds_NP_001259425.2_2453	0.470095	0.494812	0.408622
lcl|NC_004354.4_cds_NP_001259426.1_2455	0.445726	0.450609	0.397104
lcl|NC_004354.4_cds_NP_001259427.1_2459	0.534764	0.577359	0.491771
lcl|NC_004354.4_cds_NP_001259428.1_2461	0.463097	0.44615	0.371401
lcl|NC_004354.4_cds_NP_001259429.1_2464	0.517139	0.599875	0.445425
lcl|NC_004354.4_cds_NP_001259430.1_2468	0.495847	0.539265	0.437264
lcl|NC_004354.4_cds_NP_001259431.1_2475	0.491048	0.520749	0.453532
lcl|NC_004354.4_cds_NP_001259432.1_2483	0.537841	0.561924	0.50125
lcl|NC_004354.4_cds_NP_001259433.1_2513	0.482093	0.475522	0.401552
lcl|NC_004354.4_cds_NP_001259434.1_2531	0.468082	0.477736	0.414865
lcl|NC_004354.4_cds_NP_001259435.1_2541	0.501922	0.556581	0.44588
lcl|NC_004354.4_cds_NP_001259436.1_2547	0.494754	0.524756	0.416916
lcl|NC_004354.4_cds_NP_001259437.1_2562	0.527755	0.613735	0.481483
lcl|NC_004354.4_cds_NP_001259438.1_2564	0.502238	0.538591	0.454516
lcl|NC_004354.4_cds_NP_001259439.1_2579	0.499288	0.572158	0.412142
lcl|NC_004354.4_cds_NP_001259440.1_2593	0.497393	0.50347	0.45829
lcl|NC_004354.4_cds_NP_001259441.1_2594	0.497393	0.50347	0.45829
lcl|NC_004354.4_cds_NP_001259442.1_2596	0.532494	0.595698	0.478344
lcl|NC_004354.4_cds_NP_001259443.1_2598	0.541355	0.64343	0.479172
lcl|NC_004354.4_cds_NP_001259444.1_2613	0.490241	0.533759	0.41739
lcl|NC_004354.4_cds_NP_001259445.2_2621	0.510989	0.541257	0.478264
lcl|NC_004354.4_cds_NP_001259446.1_2650	0.480318	0.479006	0.437057
lcl|NC_004354.4_cds_NP_001259447.1_2658	0.483203	0.490766	0.439127
lcl|NC_004354.4_cds_NP_001259448.1_2653	0.483044	0.489287	0.438277
lcl|NC_004354.4_cds_NP_001259449.1_2646	0.433831	0.393878	0.379065
lcl|NC_004354.4_cds_NP_001259450.1_2674	0.534008	0.559481	0.476352
lcl|NC_004354.4_cds_NP_001259451.1_2679	0.461945	0.422984	0.415866
lcl|NC_004354.4_cds_NP_001259452.1_2704	0.448063	0.416398	0.414785
lcl|NC_004354.4_cds_NP_001259453.1_2729	0.479995	0.50051	0.416616
lcl|NC_004354.4_cds_NP_001259454.1_2728	0.483946	0.505891	0.419956
lcl|NC_004354.4_cds_NP_001259455.1_2735	0.462009	0.442843	0.393653
lcl|NC_004354.4_cds_NP_001259456.1_2738	0.463683	0.447202	0.401406
lcl|NC_004354.4_cds_NP_001259457.1_2737	0.456056	0.437211	0.392263
lcl|NC_004354.4_cds_NP_001259458.1_2756	0.515152	0.530228	0.471566
lcl|NC_004354.4_cds_NP_001259459.1_2757	0.515152	0.530228	0.471566
lcl|NC_004354.4_cds_NP_001259460.1_2762	0.556041	0.606489	0.528393
lcl|NC_004354.4_cds_NP_001259461.1_2765	0.498019	0.512428	0.43272
lcl|NC_004354.4_cds_NP_001259462.1_2780	0.47011	0.436063	0.441596
lcl|NC_004354.4_cds_NP_001259463.1_2798	0.484167	0.516293	0.427493
lcl|NC_004354.4_cds_NP_001259464.1_2803	0.487316	0.523393	0.410264
lcl|NC_004354.4_cds_NP_001259465.1_2806	0.500013	0.55896	0.423887
lcl|NC_004354.4_cds_NP_001259466.1_2810	0.493386	0.517707	0.433333
lcl|NC_004354.4_cds_NP_001259467.1_2816	0.529611	0.624329	0.463427
lcl|NC_004354.4_cds_NP_001259468.1_2817	0.478381	0.51044	0.445203
lcl|NC_004354.4_cds_NP_001259469.1_2821	0.497431	0.532129	0.43978
lcl|NC_004354.4_cds_NP_001259470.2_2824	0.497335	0.53305	0.438953
lcl|NC_004354.4_cds_NP_001259472.1_2823	0.500253	0.543888	0.440235
lcl|NC_004354.4_cds_NP_001259473.2_2818	0.500305	0.54275	0.441068
lcl|NC_004354.4_cds_NP_001259474.1_2827	0.477185	0.447438	0.416691
lcl|NC_004354.4_cds_NP_001259475.1_2839	0.427552	0.382936	0.35637
lcl|NC_004354.4_cds_NP_001259477.1_2853	0.44088	0.380338	0.377047
lcl|NC_004354.4_cds_NP_001259478.1_2861	0.469285	0.490694	0.422003
lcl|NC_004354.4_cds_NP_001259479.1_2863	0.469796	0.490772	0.422694
lcl|NC_004354.4_cds_NP_001259480.1_2864	0.48245	0.542216	0.458896
lcl|NC_004354.4_cds_NP_001259482.1_2894	0.404867	0.30467	0.359078
lcl|NC_004354.4_cds_NP_001259483.1_2905	0.493659	0.542522	0.444166
lcl|NC_004354.4_cds_NP_001259484.1_2930	0.466515	0.473222	0.395229
lcl|NC_004354.4_cds_NP_001259485.1_2935	0.472962	0.476423	0.427235
lcl|NC_004354.4_cds_NP_001259486.1_2936	0.485976	0.534201	0.464473
lcl|NC_004354.4_cds_NP_001259489.1_2952	0.468512	0.445048	0.392654
lcl|NC_004354.4_cds_NP_001259490.1_2976	0.493697	0.576461	0.467784
lcl|NC_004354.4_cds_NP_001259491.1_2981	0.449592	0.434517	0.396001
lcl|NC_004354.4_cds_NP_001259492.1_2987	0.44902	0.411174	0.380974
lcl|NC_004354.4_cds_NP_001259493.1_2988	0.513556	0.557307	0.465969
lcl|NC_004354.4_cds_NP_001259494.1_2994	0.482136	0.471763	0.454865
lcl|NC_004354.4_cds_NP_001259495.1_3001	0.470836	0.493177	0.410451
lcl|NC_004354.4_cds_NP_001259496.1_3002	0.470836	0.493177	0.410451
lcl|NC_004354.4_cds_NP_001259497.1_3021	0.482322	0.466589	0.426773
lcl|NC_004354.4_cds_NP_001259498.1_3022	0.482322	0.466589	0.426773
lcl|NC_004354.4_cds_NP_001259499.1_3037	0.478102	0.418604	0.434586
lcl|NC_004354.4_cds_NP_001259500.1_3045	0.453387	0.448215	0.395887
lcl|NC_004354.4_cds_NP_001259501.1_3049	0.490525	0.505872	0.421825
lcl|NC_004354.4_cds_NP_001259502.1_3084	0.516141	0.552069	0.448449
lcl|NC_004354.4_cds_NP_001259503.1_3086	0.467106	0.474223	0.412799
lcl|NC_004354.4_cds_NP_001259504.1_3088	0.46288	0.471117	0.402287
lcl|NC_004354.4_cds_NP_001259505.1_3090	0.465748	0.476658	0.410379
lcl|NC_004354.4_cds_NP_001259506.1_3096	0.527738	0.541997	0.478449
lcl|NC_004354.4_cds_NP_001259507.1_3100	0.455162	0.458148	0.388909
lcl|NC_004354.4_cds_NP_001259508.1_3104	0.45436	0.460603	0.386813
lcl|NC_004354.4_cds_NP_001259509.1_3101	0.45557	0.462035	0.386822
lcl|NC_004354.4_cds_NP_001259510.1_3102	0.45557	0.462035	0.386822
lcl|NC_004354.4_cds_NP_001259511.1_3106	0.506322	0.561401	0.448482
lcl|NC_004354.4_cds_NP_001259512.1_3112	0.514801	0.531755	0.443657
lcl|NC_004354.4_cds_NP_001259513.1_3133	0.463989	0.460567	0.404843
lcl|NC_004354.4_cds_NP_001259514.1_3169	0.462446	0.429625	0.382957
lcl|NC_004354.4_cds_NP_001259515.1_3166	0.460788	0.424857	0.377705
lcl|NC_004354.4_cds_NP_001259516.1_3167	0.460788	0.424857	0.377705
lcl|NC_004354.4_cds_NP_001259517.1_3172	0.518308	0.596053	0.429472
lcl|NC_004354.4_cds_NP_001259518.1_3174	0.498563	0.513833	0.43103
lcl|NC_004354.4_cds_NP_001259519.1_3178	0.513522	0.534836	0.448764
lcl|NC_004354.4_cds_NP_001259520.1_3176	0.501989	0.51852	0.43325
lcl|NC_004354.4_cds_NP_001259521.1_3179	0.513522	0.534836	0.448764
lcl|NC_004354.4_cds_NP_001259522.1_3189	0.656329	0.655543	0.635035
lcl|NC_004354.4_cds_NP_001259523.1_3186	0.657629	0.65734	0.636818
lcl|NC_004354.4_cds_NP_001259524.1_3183	0.662276	0.668646	0.64075
lcl|NC_004354.4_cds_NP_001259525.1_3207	0.510578	0.550046	0.442281
lcl|NC_004354.4_cds_NP_001259526.2_3212	0.469293	0.467876	0.424515
lcl|NC_004354.4_cds_NP_001259527.1_3220	0.446996	0.483109	0.363931
lcl|NC_004354.4_cds_NP_001259528.1_3244	0.492244	0.478183	0.435594
lcl|NC_004354.4_cds_NP_001259529.1_3245	0.489659	0.47503	0.428848
lcl|NC_004354.4_cds_NP_001259530.1_3248	0.51003	0.526586	0.463126
lcl|NC_004354.4_cds_NP_001259531.1_3250	0.656009	0.771253	0.646055
lcl|NC_004354.4_cds_NP_001259532.1_3253	0.516227	0.542462	0.454374
lcl|NC_004354.4_cds_NP_001259533.1_3254	0.516227	0.542462	0.454374
lcl|NC_004354.4_cds_NP_001259534.1_3262	0.49689	0.524056	0.443524
lcl|NC_004354.4_cds_NP_001259535.1_3267	0.498221	0.524663	0.445506
lcl|NC_004354.4_cds_NP_001259536.2_3271	0.50632	0.591787	0.484482
lcl|NC_004354.4_cds_NP_001259537.2_3283	0.530848	0.589068	0.470715
lcl|NC_004354.4_cds_NP_001259539.1_3301	0.448597	0.443729	0.393178
lcl|NC_004354.4_cds_NP_001259540.1_3309	0.522176	0.572007	0.461298
lcl|NC_004354.4_cds_NP_001259541.1_3310	0.522176	0.572007	0.461298
lcl|NC_004354.4_cds_NP_001259543.1_3343	0.487495	0.538814	0.448447
lcl|NC_004354.4_cds_NP_001259544.1_3360	0.465568	0.402038	0.404369
lcl|NC_004354.4_cds_NP_001259545.1_3357	0.46847	0.419451	0.402505
lcl|NC_004354.4_cds_NP_001259546.1_3398	0.488605	0.524866	0.430275
lcl|NC_004354.4_cds_NP_001259547.1_3408	0.497864	0.541302	0.461094
lcl|NC_004354.4_cds_NP_001259548.1_3410	0.481599	0.535421	0.421682
lcl|NC_004354.4_cds_NP_001259549.1_3411	0.481809	0.535223	0.422408
lcl|NC_004354.4_cds_NP_001259550.1_3414	0.46842	0.503376	0.410098
lcl|NC_004354.4_cds_NP_001259551.1_3415	0.466385	0.50007	0.404011
lcl|NC_004354.4_cds_NP_001259552.1_3433	0.526374	0.54346	0.479803
lcl|NC_004354.4_cds_NP_001259553.1_3429	0.523595	0.539957	0.477357
lcl|NC_004354.4_cds_NP_001259554.1_3428	0.527075	0.537432	0.481023
lcl|NC_004354.4_cds_NP_001259555.1_3432	0.52606	0.542134	0.479585
lcl|NC_004354.4_cds_NP_001259556.1_3472	0.472737	0.485404	0.396451
lcl|NC_004354.4_cds_NP_001259557.1_3470	0.469097	0.4767	0.394038
lcl|NC_004354.4_cds_NP_001259558.1_3468	0.463539	0.457198	0.390456
lcl|NC_004354.4_cds_NP_001259559.1_3507	0.469325	0.467693	0.40462
lcl|NC_004354.4_cds_NP_001259560.1_3498	0.465634	0.466471	0.396795
lcl|NC_004354.4_cds_NP_001259561.1_3512	0.596583	0.788492	0.579605
lcl|NC_004354.4_cds_NP_001259562.1_3513	0.502113	0.556959	0.45282
lcl|NC_004354.4_cds_NP_001259563.2_3529	0.457672	0.402917	0.415694
lcl|NC_004354.4_cds_NP_001259564.1_3533	0.470176	0.494839	0.383931
lcl|NC_004354.4_cds_NP_001259566.1_3534	0.470176	0.494839	0.383931
lcl|NC_004354.4_cds_NP_001259568.1_3541	0.469719	0.491521	0.412984
lcl|NC_004354.4_cds_NP_001259569.1_3543	0.495765	0.557647	0.411551
lcl|NC_004354.4_cds_NP_001259571.2_3572	0.46762	0.476244	0.393746
lcl|NC_004354.4_cds_NP_001259572.1_3577	0.504788	0.555624	0.440662
lcl|NC_004354.4_cds_NP_001259573.1_3581	0.554864	0.697027	0.490179
lcl|NC_004354.4_cds_NP_001259574.1_3602	0.457627	0.411269	0.386966
lcl|NC_004354.4_cds_NP_001259575.1_3607	0.473127	0.494421	0.399718
lcl|NC_004354.4_cds_NP_001259576.1_3629	0.502705	0.565636	0.449775
lcl|NC_004354.4_cds_NP_001259578.1_3630	0.502705	0.565636	0.449775
lcl|NC_004354.4_cds_NP_001259579.1_3662	0.500243	0.483274	0.395299
lcl|NC_004354.4_cds_NP_001259580.1_3686	0.426125	0.431426	0.331241
lcl|NC_004354.4_cds_NP_001259581.1_3721	0.42127	0.389727	0.380204
lcl|NC_004354.4_cds_NP_001259582.1_3716	0.457142	0.413846	0.410658
lcl|NC_004354.4_cds_NP_001259583.1_3717	0.457142	0.413846	0.410658
lcl|NC_004354.4_cds_NP_001259584.1_3758	0.577378	0.700106	0.567113
lcl|NC_004354.4_cds_NP_001259585.1_3766	0.422455	0.376997	0.364278
lcl|NC_004354.4_cds_NP_001259586.1_3767	0.422455	0.376997	0.364278
lcl|NC_004354.4_cds_NP_001259587.1_3771	0.486837	0.453981	0.445808
lcl|NC_004354.4_cds_NP_001259588.1_3773	0.494192	0.455355	0.446013
lcl|NC_004354.4_cds_NP_001259589.1_3781	0.495662	0.457616	0.445514
lcl|NC_004354.4_cds_NP_001259590.1_3812	0.460541	0.46772	0.413886
lcl|NC_004354.4_cds_NP_001259591.1_3814	0.469234	0.476704	0.422108
lcl|NC_004354.4_cds_NP_001259592.1_3838	0.518357	0.502001	0.489412
lcl|NC_004354.4_cds_NP_001259593.1_3839	0.518357	0.502001	0.489412
lcl|NC_004354.4_cds_NP_001259595.1_3863	0.48082	0.455673	0.412601
lcl|NC_004354.4_cds_NP_001259596.1_3864	0.48082	0.455673	0.412601
lcl|NC_004354.4_cds_NP_001259597.1_3865	0.480652	0.456007	0.412633
lcl|NC_004354.4_cds_NP_001259598.1_3869	0.439682	0.454665	0.387459
lcl|NC_004354.4_cds_NP_001259599.1_3870	0.439682	0.454665	0.387459
lcl|NC_004354.4_cds_NP_001259600.1_3871	0.439682	0.454665	0.387459
lcl|NC_004354.4_cds_NP_001259601.1_3894	0.570634	0.640393	0.546227
lcl|NC_004354.4_cds_NP_001259602.1_3895	0.412876	0.38215	0.225249
lcl|NC_004354.4_cds_NP_001259603.1_3907	0.451924	0.416066	0.409966
lcl|NC_004354.4_cds_NP_001259604.1_3911	0.467065	0.418364	0.404861
lcl|NC_004354.4_cds_NP_001259605.1_3915	0.501147	0.546011	0.444844
lcl|NC_004354.4_cds_NP_001259606.1_3917	0.452536	0.436985	0.413713
lcl|NC_004354.4_cds_NP_001259607.1_3916	0.460578	0.449691	0.412567
lcl|NC_004354.4_cds_NP_001259608.1_3922	0.508858	0.440754	0.489956
lcl|NC_004354.4_cds_NP_001259609.1_3923	0.508858	0.440754	0.489956
lcl|NC_004354.4_cds_NP_001259610.1_3964	0.467996	0.463225	0.418927
lcl|NC_004354.4_cds_NP_001259611.1_3965	0.467996	0.463225	0.418927
lcl|NC_004354.4_cds_NP_001259612.1_3974	0.503717	0.534688	0.428661
lcl|NC_004354.4_cds_NP_001259613.1_3975	0.503717	0.534688	0.428661
lcl|NC_004354.4_cds_NP_001259614.1_3977	0.552196	0.59804	0.503939
lcl|NC_004354.4_cds_NP_001259615.1_3982	0.55344	0.597438	0.502862
lcl|NC_004354.4_cds_NP_001259616.1_3980	0.481636	0.507201	0.390597
lcl|NC_004354.4_cds_NP_001259617.1_3978	0.552196	0.59804	0.503939
lcl|NC_004354.4_cds_NP_001259618.1_3981	0.481636	0.507201	0.390597
lcl|NC_004354.4_cds_NP_001259619.1_3998	0.467293	0.428439	0.419148
lcl|NC_004354.4_cds_NP_001259620.1_4061	0.444048	0.375405	0.382265
lcl|NC_004354.4_cds_NP_001259621.1_4064	0.51363	0.517264	0.446038
lcl|NC_004354.4_cds_NP_001259622.1_4069	0.520297	0.609555	0.447724
lcl|NC_004354.4_cds_NP_001259623.1_4076	0.486006	0.530068	0.365864
lcl|NC_004354.4_cds_NP_001259624.1_4078	0.486051	0.533206	0.364169
lcl|NC_004354.4_cds_NP_001259625.1_4108	0.533621	0.570618	0.447705
lcl|NC_004354.4_cds_NP_001259626.1_4109	0.533621	0.570618	0.447705
lcl|NC_004354.4_cds_NP_001259627.1_4110	0.533621	0.570618	0.447705
lcl|NC_004354.4_cds_NP_001259628.1_4174	0.499997	0.53272	0.444568
lcl|NC_004354.4_cds_NP_001259629.1_4183	0.447035	0.432664	0.372398
lcl|NC_004354.4_cds_NP_001259630.1_4190	0.56418	0.58903	0.505995
lcl|NC_004354.4_cds_NP_001259631.1_4192	0.480674	0.473965	0.421884
lcl|NC_004354.4_cds_NP_001259632.1_4211	0.483928	0.522207	0.406563
lcl|NC_004354.4_cds_NP_001259633.1_4213	0.480802	0.51528	0.40259
lcl|NC_004354.4_cds_NP_001259634.1_4215	0.538593	0.551269	0.474572
lcl|NC_004354.4_cds_NP_001259635.1_4221	0.481628	0.505927	0.404667
lcl|NC_004354.4_cds_NP_001259636.1_4222	0.479218	0.501266	0.408395
lcl|NC_004354.4_cds_NP_001259637.1_4217	0.482169	0.507226	0.406593
lcl|NC_004354.4_cds_NP_001259638.1_4228	0.497348	0.537624	0.456837
lcl|NC_004354.4_cds_NP_001259639.1_4231	0.504479	0.559906	0.461628
lcl|NC_004354.4_cds_NP_001259640.1_4235	0.482022	0.473996	0.443119
lcl|NC_004354.4_cds_NP_001259641.1_4302	0.50608	0.514729	0.411008
lcl|NC_004354.4_cds_NP_001259642.1_4304	0.463696	0.496976	0.394213
lcl|NC_004354.4_cds_NP_001259643.1_4315	0.478306	0.50337	0.408557
lcl|NC_004354.4_cds_NP_001259644.1_4319	0.487236	0.519205	0.42663
lcl|NC_004354.4_cds_NP_001259645.1_4313	0.486931	0.522327	0.420669
lcl|NC_004354.4_cds_NP_001259646.1_4321	0.492909	0.505878	0.452701
lcl|NC_004354.4_cds_NP_001259647.1_4338	0.463864	0.471721	0.389618
lcl|NC_004354.4_cds_NP_001259648.1_4337	0.464087	0.46978	0.389952
lcl|NC_004354.4_cds_NP_001259649.1_4336	0.463848	0.467809	0.390504
lcl|NC_004354.4_cds_NP_001259650.1_4335	0.46334	0.469289	0.389381
lcl|NC_004354.4_cds_NP_001259651.1_4329	0.45426	0.406748	0.398215
lcl|NC_004354.4_cds_NP_001259652.1_4331	0.454079	0.40562	0.39795
lcl|NC_004354.4_cds_NP_001259653.1_4332	0.454079	0.40562	0.39795
lcl|NC_004354.4_cds_NP_001259654.1_4341	0.483697	0.477229	0.431944
lcl|NC_004354.4_cds_NP_001259655.2_4342	0.484252	0.478518	0.432311
lcl|NC_004354.4_cds_NP_001259656.1_4358	0.5234	0.563037	0.470449
lcl|NC_004354.4_cds_NP_001259657.1_4359	0.521807	0.561854	0.467129
lcl|NC_004354.4_cds_NP_001259658.1_4360	0.517921	0.551621	0.464681
lcl|NC_004354.4_cds_NP_001259659.1_4354	0.521024	0.55576	0.467057
lcl|NC_004354.4_cds_NP_001259660.1_4362	0.580158	0.662767	0.544356
lcl|NC_004354.4_cds_NP_001259661.1_4364	0.581389	0.669701	0.544001
lcl|NC_004354.4_cds_NP_001259662.1_4393	0.485362	0.546998	0.425658
lcl|NC_004354.4_cds_NP_001259663.1_4414	0.55868	0.673529	0.510262
lcl|NC_004354.4_cds_NP_001259664.1_4451	0.405821	0.312114	0.338505
lcl|NC_004354.4_cds_NP_001259665.2_4443	0.416464	0.341533	0.352128
lcl|NC_004354.4_cds_NP_001259666.2_4444	0.409429	0.328872	0.360192
lcl|NC_004354.4_cds_NP_001259667.1_4465	0.517607	0.548592	0.474036
lcl|NC_004354.4_cds_NP_001259668.1_4488	0.585045	0.559689	0.568811
lcl|NC_004354.4_cds_NP_001259669.1_4489	0.585045	0.559689	0.568811
lcl|NC_004354.4_cds_NP_001259670.1_4490	0.585045	0.559689	0.568811
lcl|NC_004354.4_cds_NP_001259671.1_4498	0.515332	0.561041	0.460667
lcl|NC_004354.4_cds_NP_001259672.1_4499	0.515332	0.561041	0.460667
lcl|NC_004354.4_cds_NP_001259673.1_4504	0.489612	0.456471	0.455927
lcl|NC_004354.4_cds_NP_001259674.1_4505	0.489612	0.456471	0.455927
lcl|NC_004354.4_cds_NP_001259675.1_4509	0.535904	0.531513	0.466143
lcl|NC_004354.4_cds_NP_001259676.1_4514	0.499342	0.569224	0.445316
lcl|NC_004354.4_cds_NP_001259677.1_4535	0.495122	0.553653	0.413393
lcl|NC_004354.4_cds_NP_001259678.1_4537	0.504968	0.567705	0.440157
lcl|NC_004354.4_cds_NP_001259679.1_4541	0.491024	0.568886	0.404771
lcl|NC_004354.4_cds_NP_001259680.1_4542	0.491024	0.568886	0.404771
lcl|NC_004354.4_cds_NP_001259681.1_4561	0.434327	0.408295	0.379918
lcl|NC_004354.4_cds_NP_001259682.1_4563	0.500292	0.575908	0.419046
lcl|NC_004354.4_cds_NP_001259683.1_4564	0.502738	0.463999	0.457997
lcl|NC_004354.4_cds_NP_001259684.2_4567	0.472795	0.472506	0.391772
lcl|NC_004354.4_cds_NP_001259685.1_4585	0.526205	0.5576	0.478842
lcl|NC_004354.4_cds_NP_001259686.1_4586	0.526205	0.5576	0.478842
lcl|NC_004354.4_cds_NP_001259687.1_4592	0.507805	0.556907	0.434515
lcl|NC_004354.4_cds_NP_001259688.2_4587	0.521199	0.581407	0.450078
lcl|NC_004354.4_cds_NP_001259689.1_4622	0.554918	0.606819	0.489012
lcl|NC_004354.4_cds_NP_001259691.1_4634	0.480448	0.485236	0.427555
lcl|NC_004354.4_cds_NP_001259693.1_4644	0.503987	0.597596	0.448525
lcl|NC_004354.4_cds_NP_001259694.1_4648	0.535175	0.566923	0.462002
lcl|NC_004354.4_cds_NP_001259695.1_4650	0.48446	0.514938	0.428844
lcl|NC_004354.4_cds_NP_001259697.1_4664	0.489789	0.553932	0.433464
lcl|NC_004354.4_cds_NP_001259698.1_4666	0.489079	0.564983	0.436124
lcl|NC_004354.4_cds_NP_001259699.1_4690	0.48675	0.569069	0.433316
lcl|NC_004354.4_cds_NP_001259700.1_4697	0.496507	0.575615	0.462237
lcl|NC_004354.4_cds_NP_001259701.1_4707	0.453994	0.475416	0.390629
lcl|NC_004354.4_cds_NP_001259702.1_4713	0.500148	0.601862	0.393816
lcl|NC_004354.4_cds_NP_001259703.1_4718	0.52336	0.596474	0.455735
lcl|NC_004354.4_cds_NP_001259704.1_4723	0.553002	0.638243	0.453509
lcl|NC_004354.4_cds_NP_001259705.1_4771	0.573798	0.675596	0.534054
lcl|NC_004354.4_cds_NP_001259706.1_4780	0.543248	0.602127	0.48295
lcl|NC_004354.4_cds_NP_001259707.1_4792	0.517855	0.584828	0.435475
lcl|NC_004354.4_cds_NP_001259708.1_4795	0.506513	0.535458	0.441266
lcl|NC_004354.4_cds_NP_001259709.1_4802	0.484595	0.529049	0.421511
lcl|NC_004354.4_cds_NP_001259710.1_4807	0.474535	0.484245	0.423455
lcl|NC_004354.4_cds_NP_001259711.1_4830	0.474291	0.451598	0.412157
lcl|NC_004354.4_cds_NP_001259712.1_4831	0.474291	0.451598	0.412157
lcl|NC_004354.4_cds_NP_001259713.1_4834	0.53767	0.567859	0.480951
lcl|NC_004354.4_cds_NP_001259714.1_4836	0.502295	0.516586	0.455716
lcl|NC_004354.4_cds_NP_001259715.1_4838	0.49249	0.500542	0.443376
lcl|NC_004354.4_cds_NP_001259716.1_4839	0.49249	0.500542	0.443376
lcl|NC_004354.4_cds_NP_001259717.1_4841	0.508964	0.571436	0.444485
lcl|NC_004354.4_cds_NP_001259718.1_4843	0.476704	0.474078	0.414955
lcl|NC_004354.4_cds_NP_001259719.1_4846	0.476372	0.473242	0.414838
lcl|NC_004354.4_cds_NP_001259720.1_4847	0.476417	0.474078	0.41472
lcl|NC_004354.4_cds_NP_001259721.1_4844	0.476704	0.474078	0.414955
lcl|NC_004354.4_cds_NP_001259722.1_4850	0.529401	0.624213	0.48761
lcl|NC_004354.4_cds_NP_001259723.1_4862	0.452345	0.514817	0.40328
lcl|NC_004354.4_cds_NP_001259724.1_4863	0.452345	0.514817	0.40328
lcl|NC_004354.4_cds_NP_001259725.1_4866	0.561899	0.617575	0.516672
lcl|NC_004354.4_cds_NP_001259726.1_4879	0.499372	0.57093	0.39011
lcl|NC_004354.4_cds_NP_001259728.1_4894	0.487589	0.526189	0.442882
lcl|NC_004354.4_cds_NP_001259730.1_4906	0.507262	0.510299	0.449724
lcl|NC_004354.4_cds_NP_001259731.1_4913	0.545965	0.626615	0.525193
lcl|NC_004354.4_cds_NP_001259732.1_4916	0.55041	0.646789	0.533708
lcl|NC_004354.4_cds_NP_001259733.1_4918	0.545947	0.643228	0.528899
lcl|NC_004354.4_cds_NP_001259734.1_4917	0.55041	0.646789	0.533708
lcl|NC_004354.4_cds_NP_001259735.1_4920	0.522246	0.570771	0.439716
[truncated: 28,561 more rows]
